# Supplementary material for: Design, synthesis, docking, MD simulations, and anti-proliferative evaluation of thieno[2,3-d]pyrimidine derivatives as new EGFR inhibitors
Source: PubMed Central journal article supplement — J Enzyme Inhib Med Chem. 2023 Jun 8;38(1):2220579. doi: 10.1080/14756366.2023.2220579 (PMC10251802; doi:10.1080/14756366.2023.2220579), 2023-06-08
Supplement: IENZ_A_2220579_SM0701.pdf [file IENZ_A_2220579_SM0701.pdf]

**Design, synthesis, docking, MD simulations, and anti-proliferative evaluation of thieno[2,3-d]pyrimidine derivatives as new EGFR inhibitors**

Eman A. Sobh<sup>a\*</sup>, Mohammed A. Dahab<sup>b\*</sup>, Eslam B. Elkaeed<sup>c</sup>, Aisha A. Alsouk<sup>d</sup>, Ibrahim M.

Ibrahim<sup>e</sup>, Ahmed M. Metwaly<sup>f, g</sup>, Ibrahim H. Eissa<sup>b\*</sup>.

<sup>a</sup> Department of Pharmaceutical Chemistry, Faculty of Pharmacy, Menoufia University, Menoufia, Shibin-El-Kom, Gamal Abd Al-Nasir Street, Egypt.

<sup>b</sup> Pharmaceutical Medicinal Chemistry & Drug Design Department, Faculty of Pharmacy (Boys), Al-Azhar University, Cairo, 11884, Egypt.

<sup>c</sup> Department of Pharmaceutical Sciences, College of Pharmacy, AlMaarefa University, Riyadh 13713, Saudi Arabia.

<sup>e</sup> Department of Pharmaceutical Sciences, College of Pharmacy, Princess Nourah bint Abdulrahman University, P.O. Box 84428, Riyadh 11671, Saudi Arabia.

<sup>f</sup> Biophysics Department, Faculty of Science, Cairo University. Cairo 12613, Egypt.

<sup>f</sup> Pharmacognosy and Medicinal Plants Department, Faculty of Pharmacy (Boys), Al-Azhar University, Cairo, Egypt

<sup>g</sup> Biopharmaceutical Products Research Department, Genetic Engineering and Biotechnology Research Institute, City of Scientific Research and Technological Applications (SRTA-City), Alexandria 21934, Egypt

**\* Corresponding authors:**

**Eman A. Sobh**

Pharmaceutical Chemistry Department, Faculty of Pharmacy, Menoufia University, Menoufia, Egypt.

E-mail: [Eman\\_abd-elfattah@phrm.menoufia.edu.eg](mailto:Eman_abd-elfattah@phrm.menoufia.edu.eg)

**Mohammed A. Dahab**

Pharmaceutical Medicinal Chemistry & Drug Design Department, Faculty of Pharmacy (Boys), Al-Azhar University, Cairo, 11884, Egypt

E-mail: [mohammeddahab@azhar.edu.eg](mailto:mohammeddahab@azhar.edu.eg)

**Ibrahim H. Eissa**

Pharmaceutical Medicinal Chemistry & Drug Design Department, Faculty of Pharmacy (Boys), Al-Azhar University, Cairo, 11884, Egypt

Email: [Ibrahimeissa@azhar.edu.eg](mailto:Ibrahimeissa@azhar.edu.eg)

| Content                     |
|-----------------------------|
| 1. Chemistry                |
| 2. Biology                  |
| 3. <i>In silico</i> studies |
| 4. Spectral data            |

## 1. Chemistry

All commercially available materials were purchased from commercial sources and used without further purification. All reactions were performed in a temperature-controlled oil/wax bath. Reactions were monitored by analytical thin layer chromatography (TLC), using aluminum-backed plates, cut to size. TLC visualization was achieved by UV. <sup>1</sup>H NMR and <sup>13</sup>C NMR spectra were recorded on Bruker AVANCE 400 MHz spectrometers at ambient temperature. Spectral data is reported in ppm, coupling constants (*J*) in Hz. IR spectra were recorded as KBr pellets on a PerkinElmer Spectrum one FT-IR spectrometer. Mass spectroscopy (MS) was performed at NAWAH scientific Mass Spectroscopy Centre on Advion compact mass spectrometer (CMS) NY | USA for APCI. All melting points were taken on a Gallenkamp melting point apparatus and are uncorrected. Nomenclature was determined using ChemBioDraw Ultra 14.0.

### *Ethyl 2-amino-6-methyl-4,5,6,7-tetrahydro[1]benzothiophene-3-carboxylate (2)*

A mixture of 4-methylcyclohexanone (**1**) (4.48 g, 40 mmol), ethyl cyanoacetate (4.52 g, 40 mmol), sulphur (1.28 g, 40 mmol) and morpholine (5 mL) in absolute ethanol (25 mL) was heated on water-bath at 40°C for 4 h. The reaction mixture was allowed to cool to room temperature, the formed solid was filtered, dried and crystallized from ethanol to give **2**.

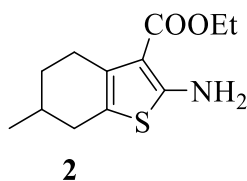

### 6-Methyl-5,6,7,8-tetrahydro[1]benzothieno[2,3-d]pyrimidin-4(3H)-one (3)

A mixture of ethyl 2-amino-6-methyl-4,5,6,7-tetrahydro[1]benzothiophene-3-carboxylate (2) (0.24 g, 1 mmol) and formamide (99.5%) (15 mL) was heated under reflux for 5 h. The solvent was then evaporated under reduced pressure and the residue was crystallized isopropanol.

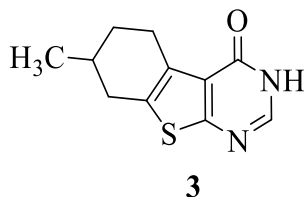

## 2. Biological testing

### 2.1. In vitro antiproliferative activity

The *in vitro* antiproliferative activities of all the synthesized compounds against a panel of four human tumor cell lines namely, A549 and MCF-7 cell were evaluated quantitatively as described in the literature, using MTT assay protocol. Two commercially available drugs (erlotinib) were used in this test as positive controls. The anti-proliferative activity was assessed quantitatively as follows.

Human cancer cell lines were dropped in 96-well plates at a density of  $3-8 \times 10^3$  cells/well. Next, the wells were incubated for 12 h in a 5% CO<sub>2</sub> incubator at 37 °C. Then, for each well, the growth medium was exchanged with 0.1 ml of fresh medium containing graded concentrations of the test compounds to be or equal DMSO and incubated for two days. Then 10 µl MTT solution (5 µg/ml) was added to each well, and the cells were incubated for additional 4 h. The crystals of MTT-formazan were dissolved in 100 µl of DMSO; the absorbance of each well was measured at 490 nm using an automatic ELISA reader system (TECAN, CHE). The IC<sub>50</sub> values were calculated using the nonlinear regression fitting models (Graph Pad, Prism Version 5). The data represented the mean of three independent experiments in triplicate and were expressed as means ± SD. The IC<sub>50</sub> value was defined as the concentration at which 50% of the cells could survive.

### 2.2. Safety assay

The normal cell lines, W138, were utilized. MTT assay was applied as described before.

### **2.3. *In vitro* EGFR inhibition**

The tested compounds were examined for their inhibitory activities against both EGFR<sup>WT</sup> and EGFR<sup>T790M</sup>. Homogeneous time resolved fluorescence (HTRF) assay was applied in this test. EGFR<sup>WT</sup>, EGFR<sup>T790M</sup> (Sigma). firstly, the EGFR<sup>WT</sup> and/or EGFR<sup>T790M</sup> and their substrates were incubated with the tested compounds in enzymatic buffer for 5 min. ATP (1.65  $\mu$ M) was added into the reaction mixture to allow starting the enzymatic reaction. The assay was conducted for 30 min at room temperature. The reaction was stopped by addition of detection reagents which contain EDTA. The detection step continued for 1 h, and then the IC<sub>50</sub> values were determined by GraphPad Prism 5.0. Three independent experiments were performed for each concentration.

### **2.4. Cell cycle analysis**

A549 cells were exposed to compound **5b** at a concentration of 17.79  $\mu$ M  $\mu$ M for 72h. Then, the tested cells were collected by trypsinization and washed in PBS. Ice-cold absolute ethanol was used for fixation of the collected cells. The cells were stained with Cycle TESTTM PLUS DNA Reagent Kit (BD Biosciences, San Jose, CA) according to the manufacturer's instructions. Cell-cycle distribution was evaluated using a flow cytometer.

### **2.5. Apoptosis analysis**

To detect the apoptosis induced by compound **5b**, A549 cells were seeded and incubated overnight and then treated with compound **5b** at concentrations of 17.79  $\mu$ M for 72 h. DMSO was chosen as the negative control. After that, the cells were collected and washed with PBS two successive times. The cells were exposed to centrifugation. Apoptosis detection kit (BD Biosciences, San Jose, CA) was used in this test. According to the manufacturer's protocol the cells were stained by Annexin V-FITC and propidium iodide (PI) in the binding buffer for 20min at room temperature in the dark. Using a flow cytometer, Annexin V-FITC and PI binding were analyzed. flowjo software was used to analyze the frequencies in all quadrants.

### **2.6. Quantitative Real Time Reverse-Transcriptase PCR technique (determination of BAX and Bcl-2)**

The quantity of BAX and Bcl-2 mRNA in control and compound 5b (at the IC<sub>50</sub> concentration)-treated A549 cells was assessed by qRT-PCR (reference). Total RNA from vehicle-treated control (0.01% DMSO) and 10k-treated HepG2 cells were extracted as-per the manufacturer instructions (RNeasy mini kit, Qiagen, Germany). After RNA extraction, cDNA was prepared



using the Revert Aid First Strand cDNA Synthesis kit (Thermo Scientific, USA). Amplification of target cDNA for apoptosis markers and GAPDH [as a normalization (housekeeping) gene] was done using one-step RT-PCR SYBR® Green kit Master Mix (Bio-Rad Laboratories, USA) on Rotor-Gene Q real-time PCR thermal cycler instrument. cDNA (2 µl aliquots) was mixed with 1 µl of forward primer, 1 µl reverse primer, 10 µl master mixture, and the reaction volume was completed to 20 µl with nuclease-free water. All experiments were performed in triplicates.

The sequences for primers used in quantitative Real Time Reverse-Transcriptase PCR (qRT-PCR)

| Gene         | Primer sequence                       |
|--------------|---------------------------------------|
| <b>BAX</b>   | F: 5'- CCCGAGAGGTCTTTTCCGAG -3'       |
|              | R: 5'- CCAGCCCATGATGGTTCTGAT -3'      |
| <b>Bcl-2</b> | F: 5'- TTGTGGCCTTCTTTGAGTTCGGTG -3'   |
|              | R: 5'- GGTGCCGGTTCAGGTA CT CAGTCA -3' |
| <b>GABDH</b> | F: 5'- GACCCCTTCAT GACCTCAAC -3'      |
|              | R: 5'- CTTCTCCATGGTGGT GAAGA -3'      |

### 3. *In silico* studies

#### 3.1. Docking studies

The crystal structures of the target enzymes EGFR<sup>WT</sup> (PDB ID: 4HJO, resolution 2.75 Å and EGFR<sup>T790M</sup> (PDB ID: 3W2O, resolution 2.35 Å) were downloaded from Protein Data Bank (<http://www.pdb.org>). Molecular Operating Environment (MOE) was used for the docking analysis [91]. In these studies, the free energies and binding modes of the designed molecules against EGFR<sup>WT</sup> and EGFR<sup>T790M</sup> were determined. At first, the water molecules were removed from the crystal structures of EGFR<sup>WT</sup> and EGFR<sup>T790M</sup>, retaining only one chain in each enzyme. Erlotinib and TAK-285 (The co-crystallized ligands) were utilized as references in the docking processes against both EGFR<sup>WT</sup> and EGFR<sup>T790M</sup>, respectively. After that, in order to prepare the target molecules for binding with the designed compounds, the target proteins were subjected to protonation step. Then, the hydrogen atoms were hidden to make the areas

of interaction clearer. Next, the energy of all systems was minimized followed by identification the binding pockets of the target proteins.

The structures of the designed compounds and the co-crystallized ligands, erlotinib and TAK-285 were drawn using ChemBioDraw Ultra 14.0 and saved as SDF format. Then, the saved files were opened using MOE and 3D structures were protonated. Next, the energy of the molecules was minimized. Validation process was performed for each target by running the docking process for only the co-crystallized ligand. Low RMSD values between docked and crystal conformations indicate valid performance. The docking procedures were carried out utilizing a default protocol. In each case, 10 docked structures were generated using genetic algorithm searches. The output from of MOE was further analyzed and visualized using Discovery Studio 4.0 software.

### **3.2.M D simulations**

Molecular dynamics simulation of the protein-ligand complexes was performed using GROMACS 2021 and Linux 5.4 package. The GROMOS96 54a7 forcefield was selected as the force field for proteins and the ligand topologies were generated from the PRODRG server. All the complexes were solvated using simple point charge (SPC) water molecules in a rectangular box. To make the simulation system electrically neutral, required number of Na<sup>+</sup> and Cl<sup>-</sup> ions were added while 0.15 mol/L salt concentrations were set in all the systems. Using the steepest descent method, all the solvated systems were subjected to energy minimization for 5000 steps. Afterwards, NVT (constant number of particles, volume, and temperature) series, NPT (constant number of particles, pressure, and temperature) series, and the production run were conducted in the MD simulation. The NVT and the NPT series were conducted at a 300 K temperature and 1 atm pressure for the duration of 300 ps. V-rescale thermostat and Parrinello-Rahman barostat were selected of the performed simulation. Finally, the production run was performed at 300 K for a duration of 100 ns (nanoseconds). Thereafter, a comparative analysis was performed measuring root mean square deviation (RMSD), root mean square fluctuation (RMSF), radius of gyration (Rg), solvent accessible surface area (SASA) and hydrogen bonds to analyze their stability. The Xmgrace program was used to represent the analyses in the form of plots.

### 3.3.MM-GBSA

The `g_mmpbsa` package of GROMACS was utilized to calculate the MM/PBSA (Molecular Mechanics/Poisson Boltzmann Surface Area) binding free energies followed by final MD production run to get a detailed overview of the molecular interactions between the protein and ligand. The free solvation energy (polar and nonpolar solvation energies) and potential energy (electrostatic and Van der Waals interactions) of each protein-ligand complex were analyzed to determine the total  $\Delta G_{\text{bind}}$  of the complex. The binding energies were calculated using the following equation in this method:

$$\Delta G_{\text{binding}} = G_{\text{complex}} - (G_{\text{protein}} + G_{\text{ligand}})$$

Here, the  $\Delta G_{\text{binding}}$  = the total binding energy of the protein-ligand complex,  $G_{\text{protein}}$  = the binding energy of free protein, and  $G_{\text{ligand}}$  = the binding energy of unbounded ligand.

### 3.4.ADMET studies

ADMET descriptors (absorption, distribution, metabolism, excretion and toxicity) of the tested compounds were determined using Discovery studio 4.0. At first, the CHARMM force field was applied then the tested compounds were prepared and minimized according to the preparation of small molecule protocol. Then ADMET descriptors protocol was applied to carry out these studies.

### 3.5.Toxicity studies

The toxicity parameters of the synthesized compounds were calculated using Discovery studio 4.0. Sorafenib was used as a reference drug. At first, the CHARMM force field was applied then the compounds were prepared and minimized according to the preparation of small molecule protocol. Then different parameters were calculated from toxicity prediction (extensible) protocol.

# $^1\text{H}$ NMR of compound 4

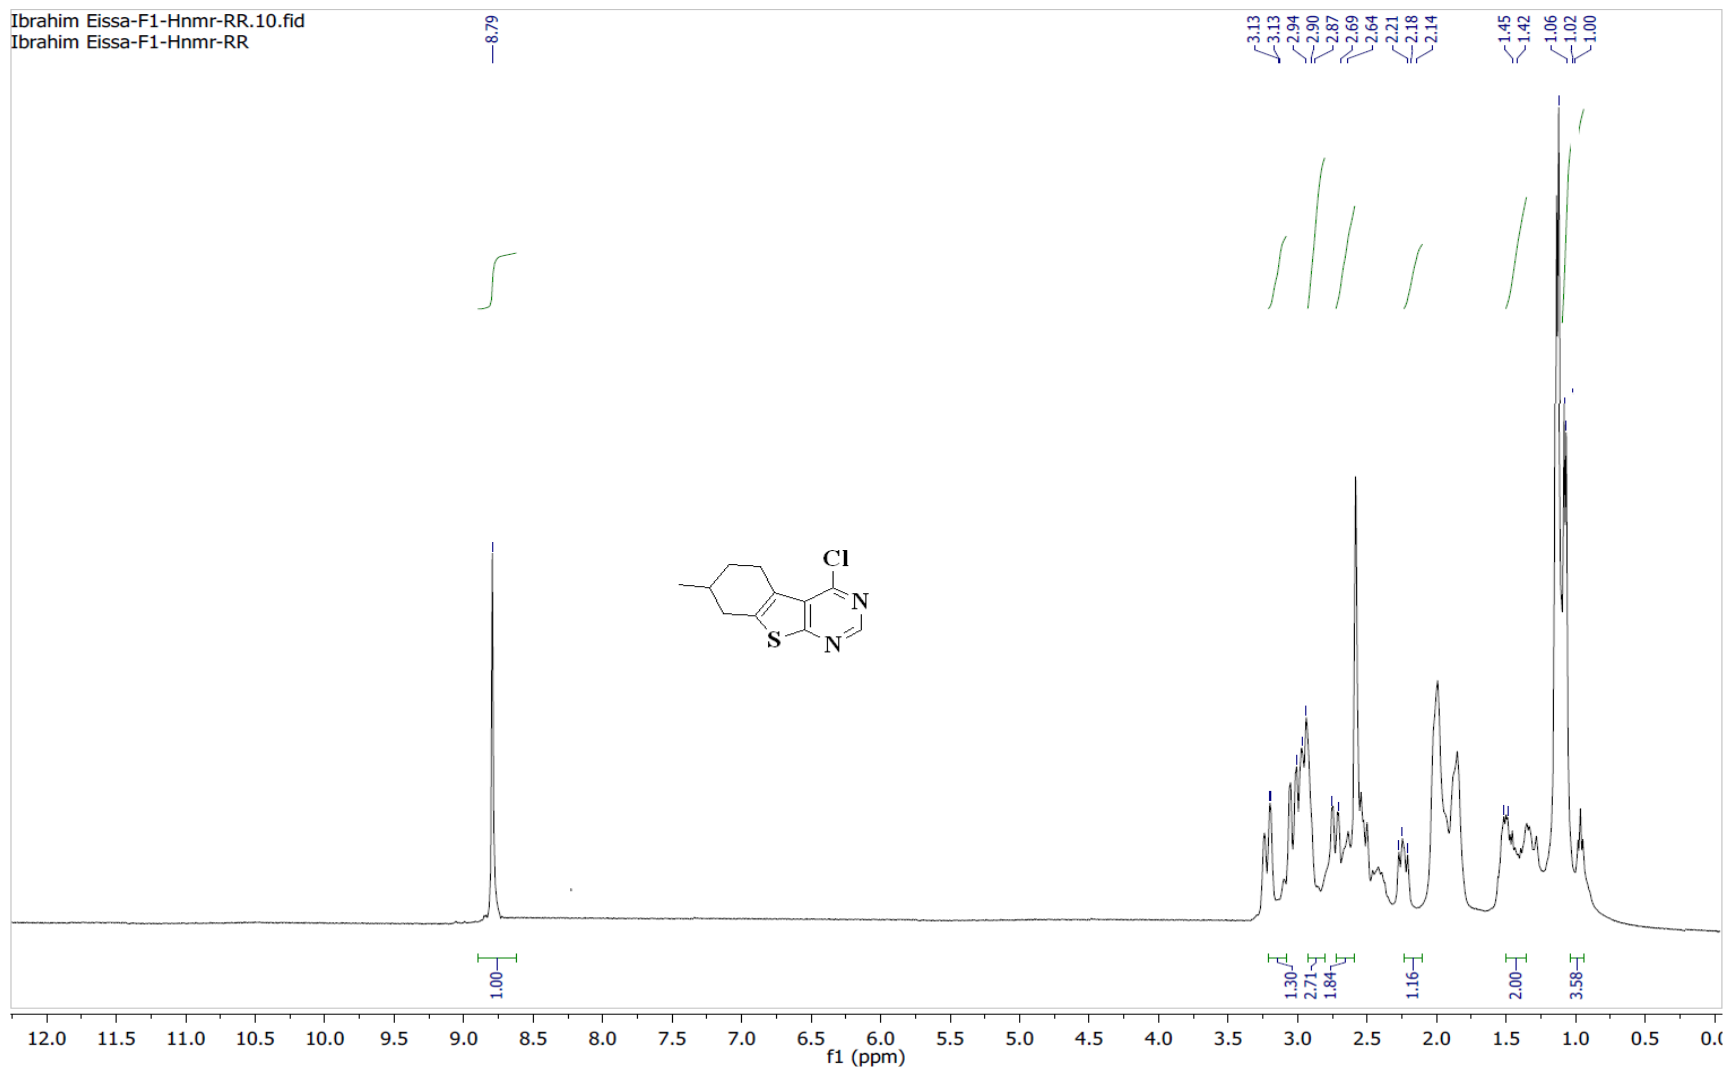

# **$H^1$ NMR of compound 5a**

Ibrahim Eissa-F2-Hnmr-RR.10.fid  
Ibrahim Eissa-F2-Hnmr-RR

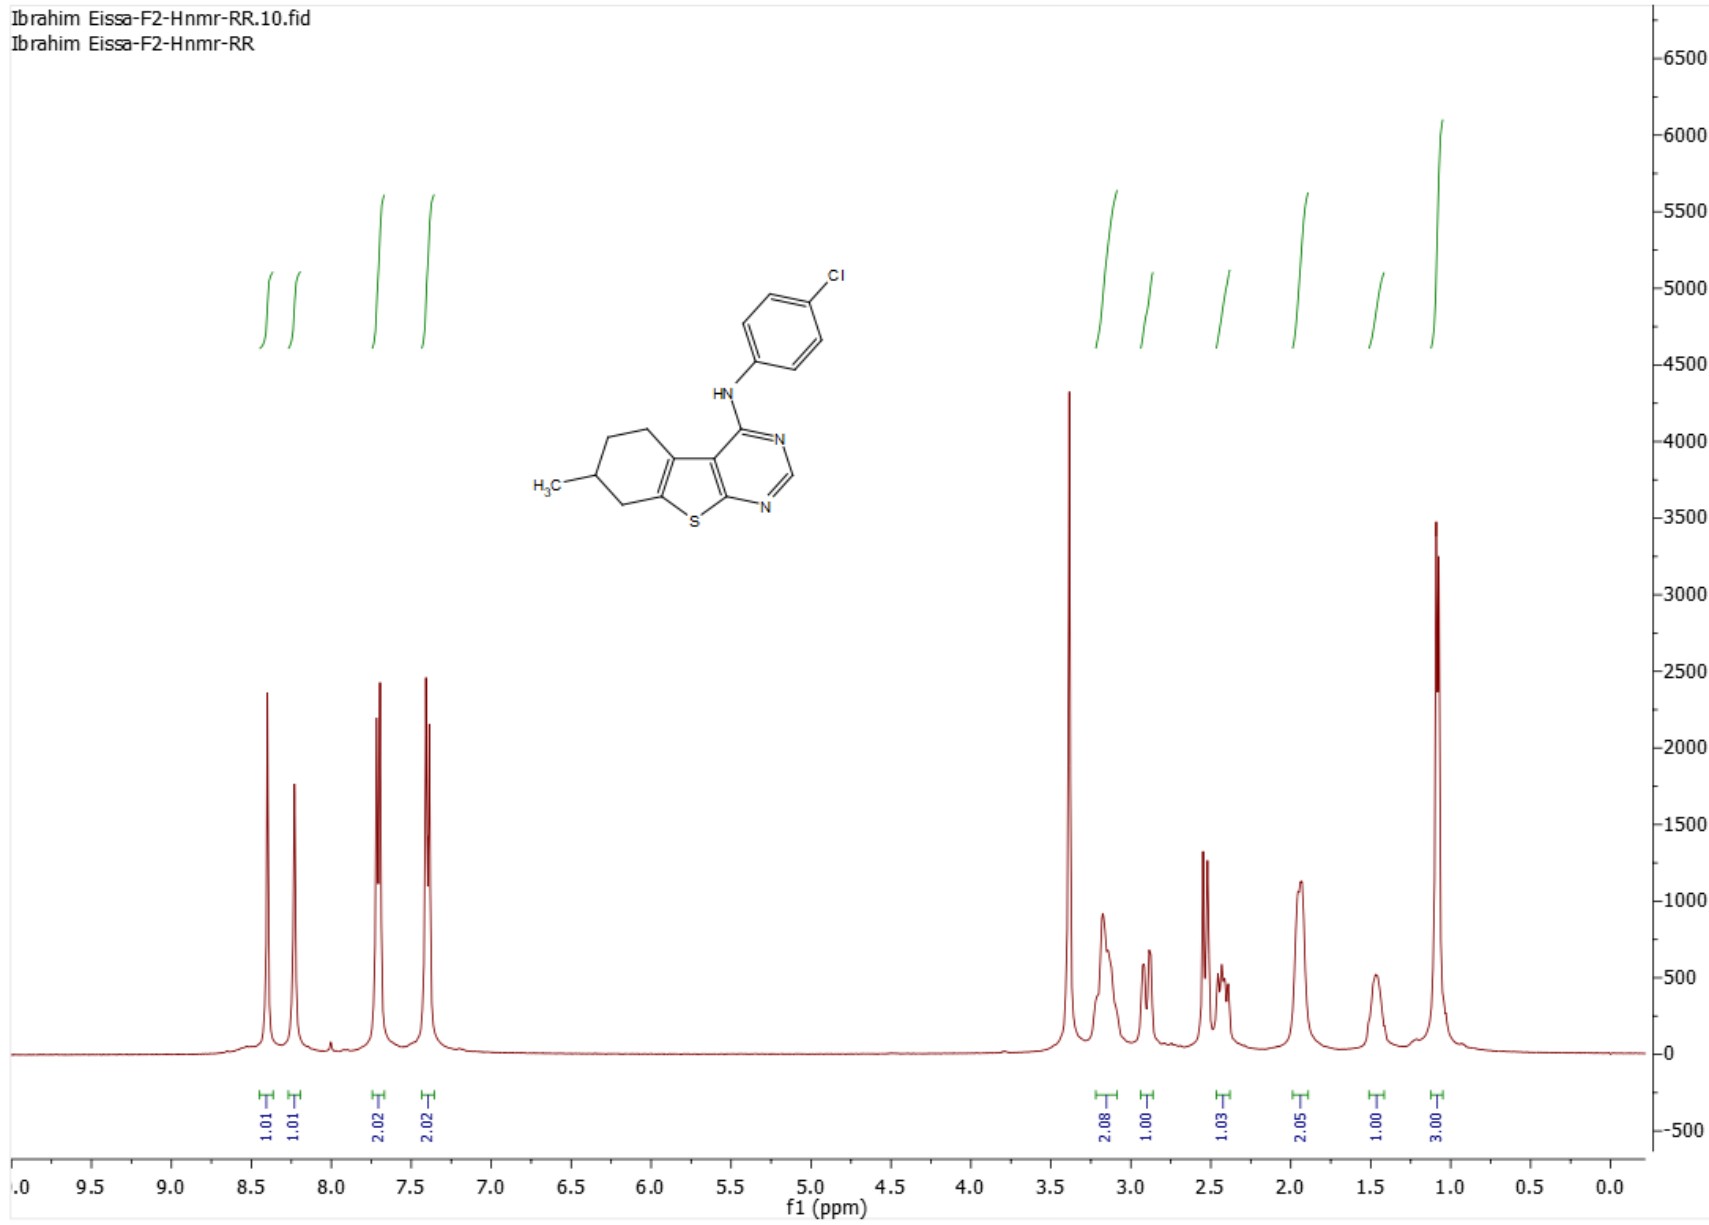

# H1 NMR of compound 5b

Eman Sobh\_H\_2-F-aniline.10.fid  
Eman Sobh\_H\_2-F-aniline

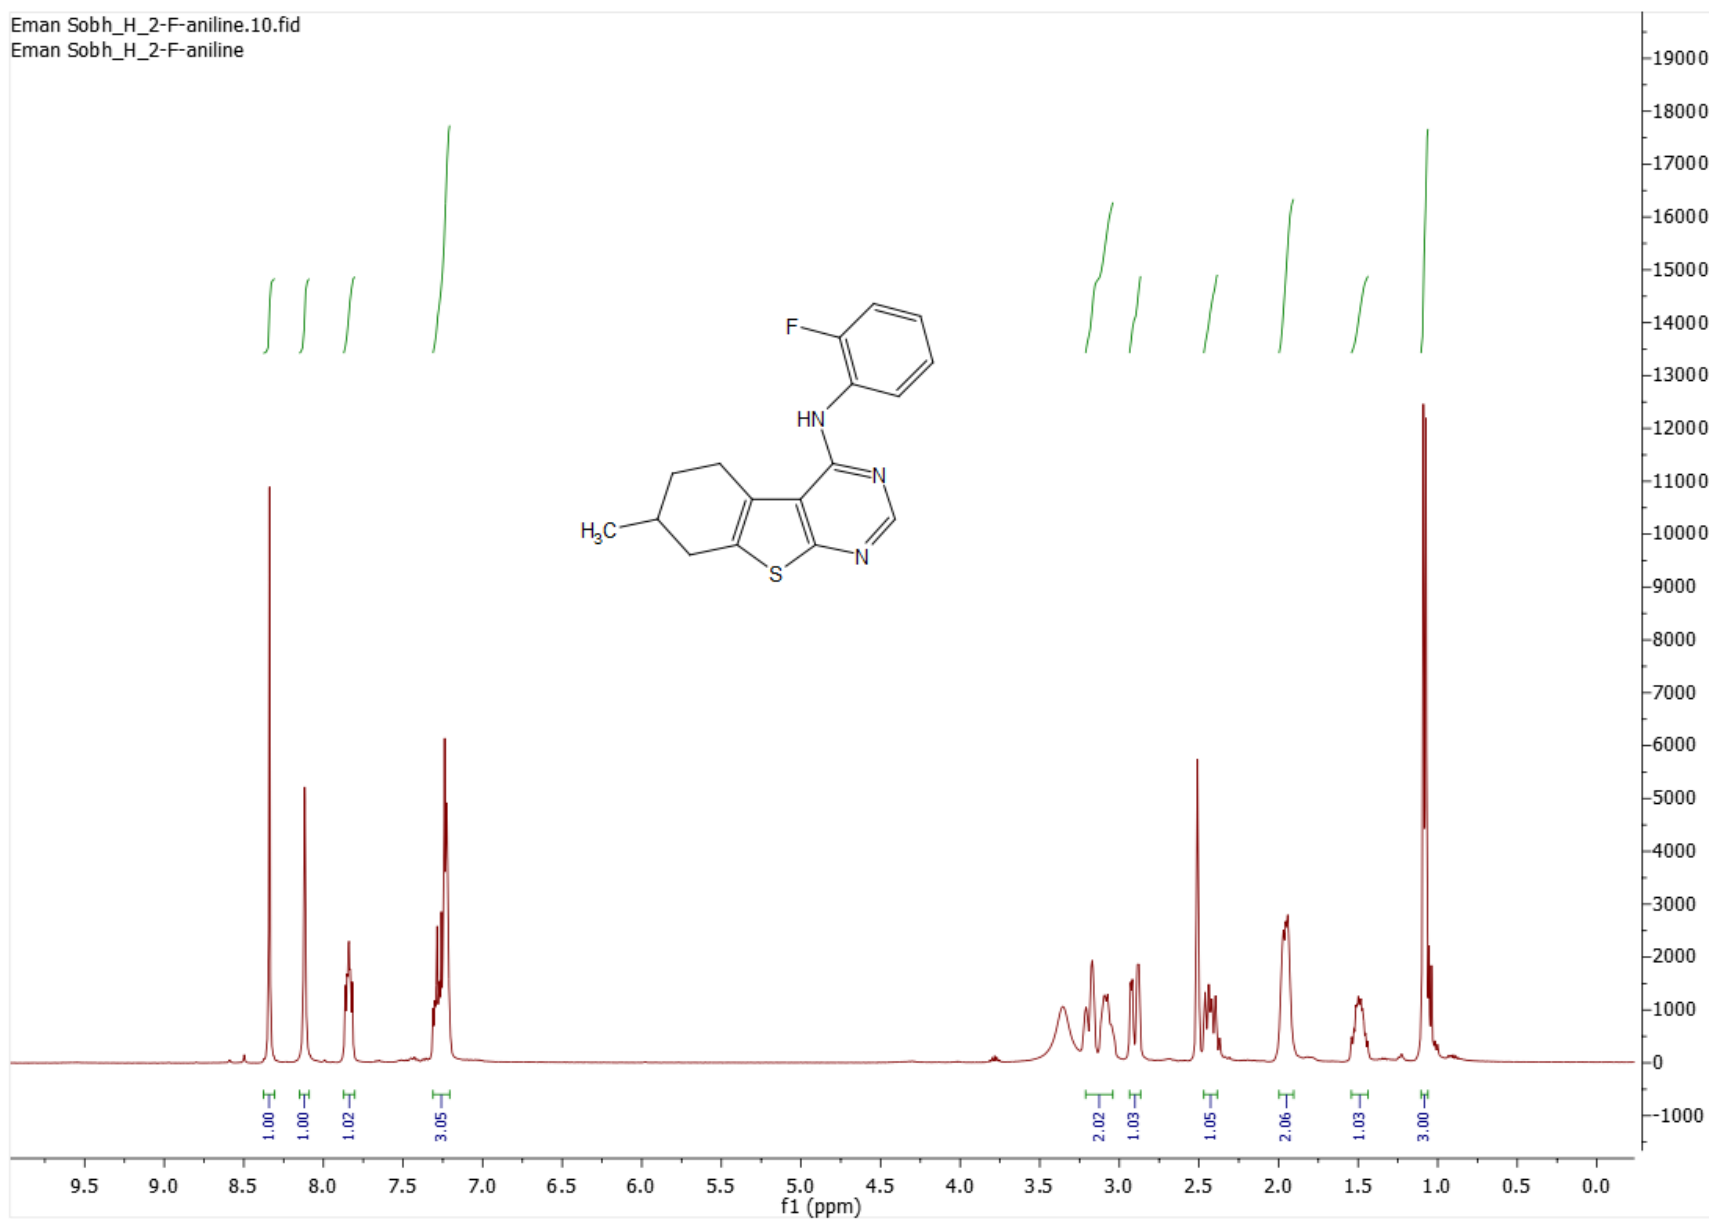

# H1 NMR of compound 5c

Ibrahim Eissa-F4-Hnmr-RR.10.fid  
Ibrahim Eissa-F4-Hnmr-RR

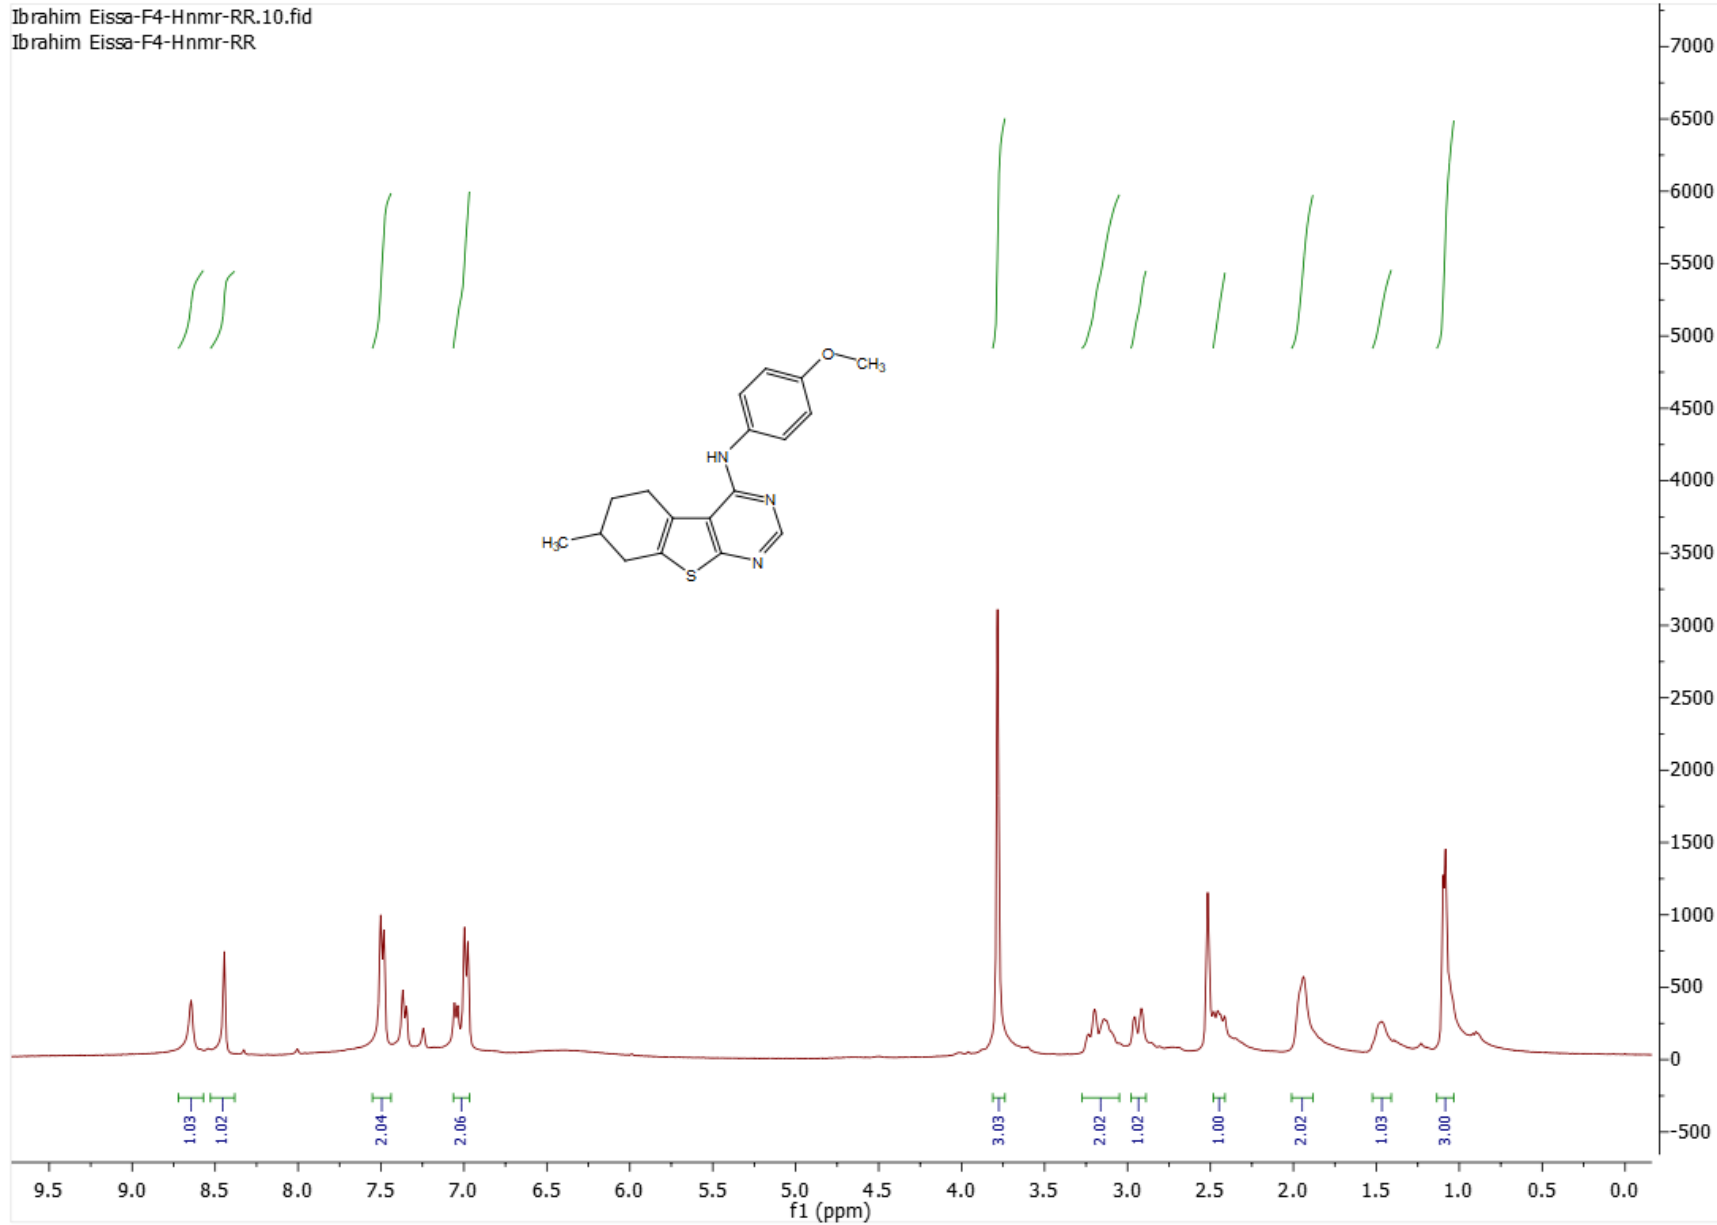

# H1 NMR of compound 5d

Ibrahim Eissa-F5-Hnmr-RR.10.fid  
Ibrahim Eissa-F5-Hnmr-RR

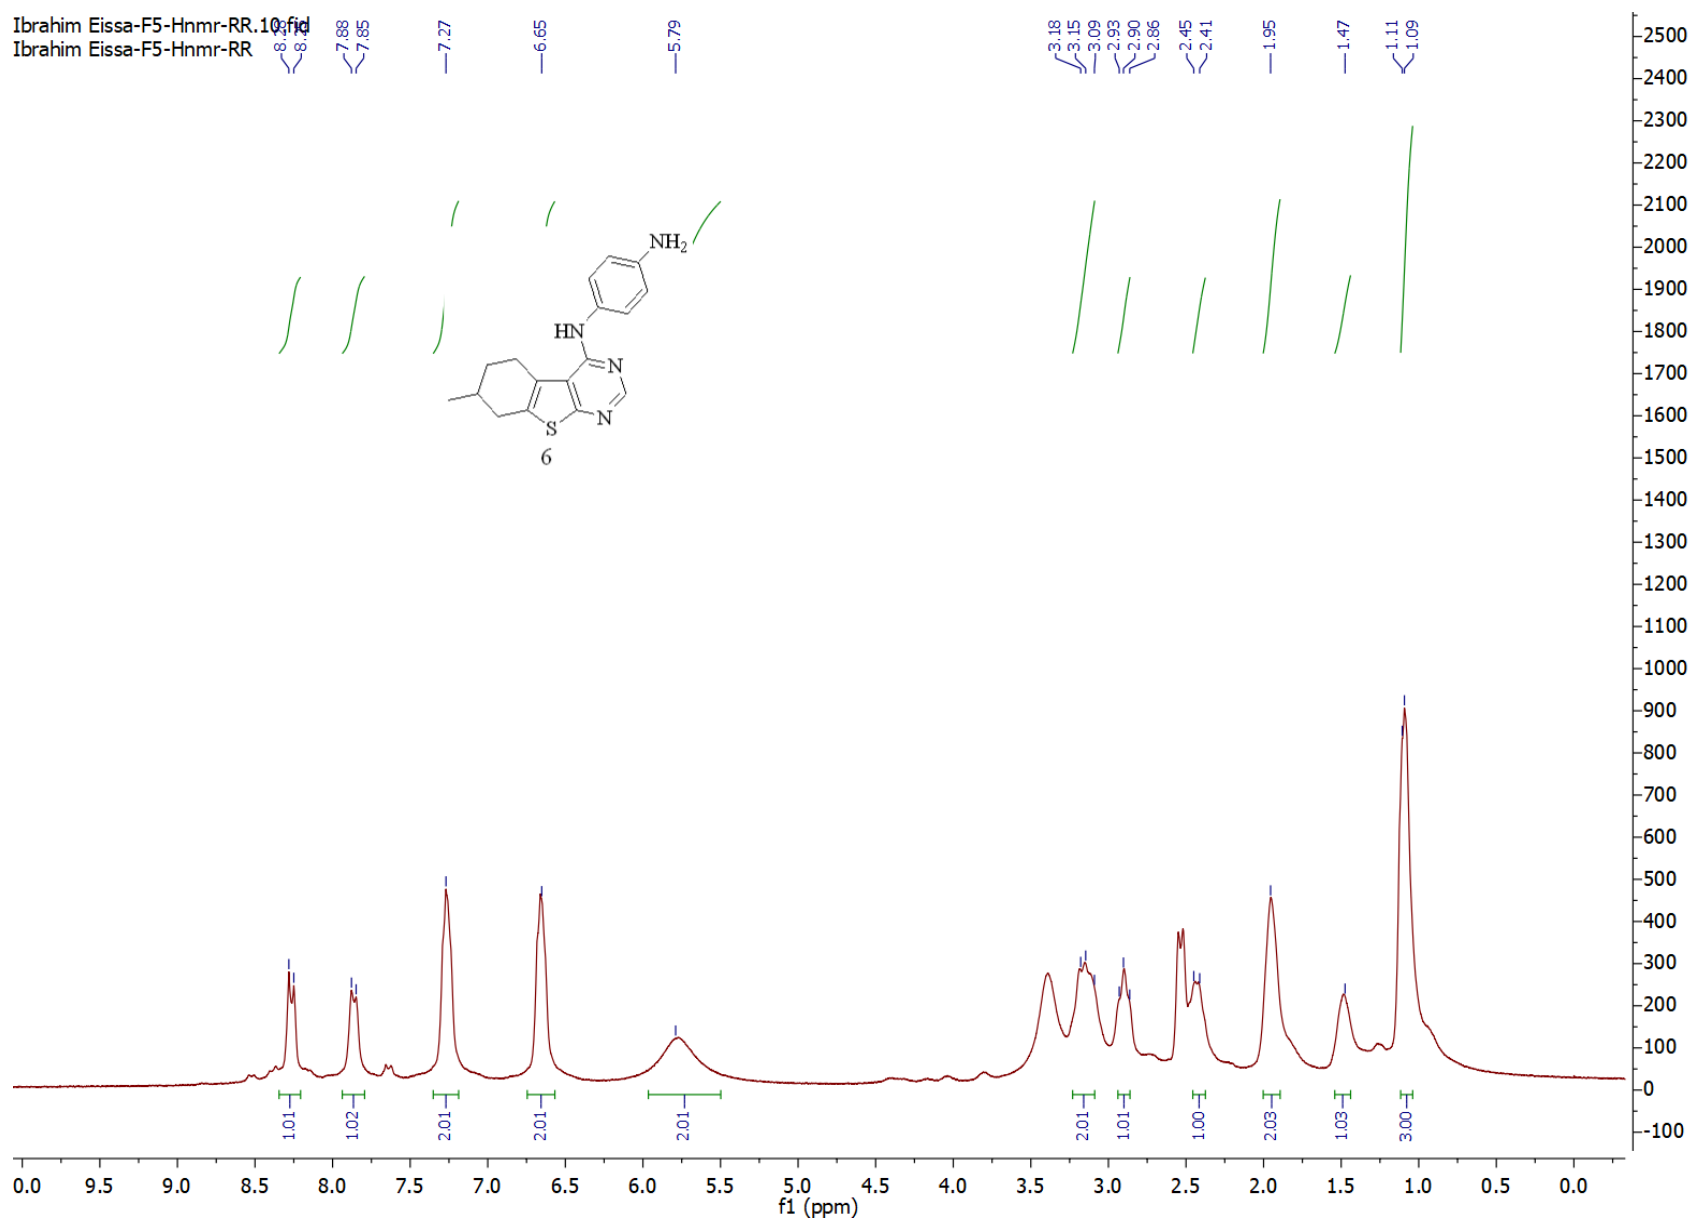



# H1 NMR of compound 5e

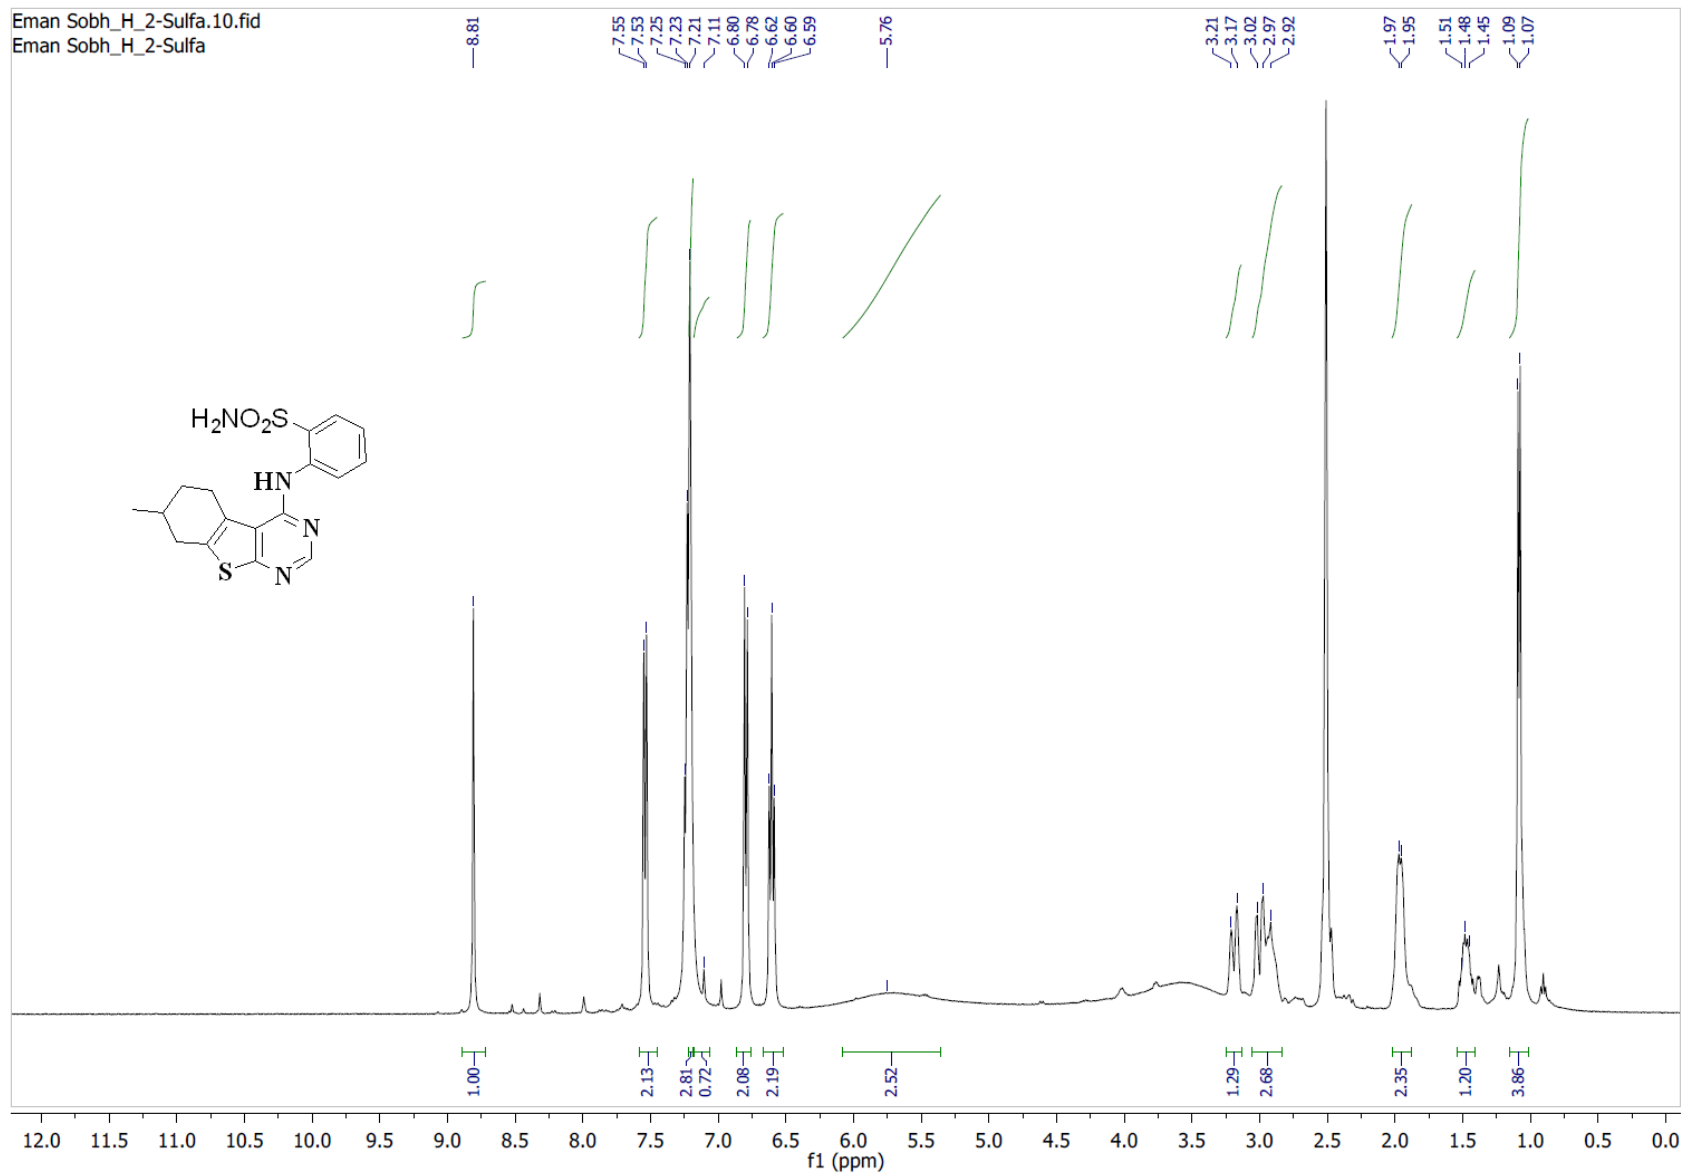

# H1 NMR of compound 5f

Ibrahim Eissa - F9 - Hnmr - T.10.fid

Ibrahim Eissa - F9 - Hnmr - T

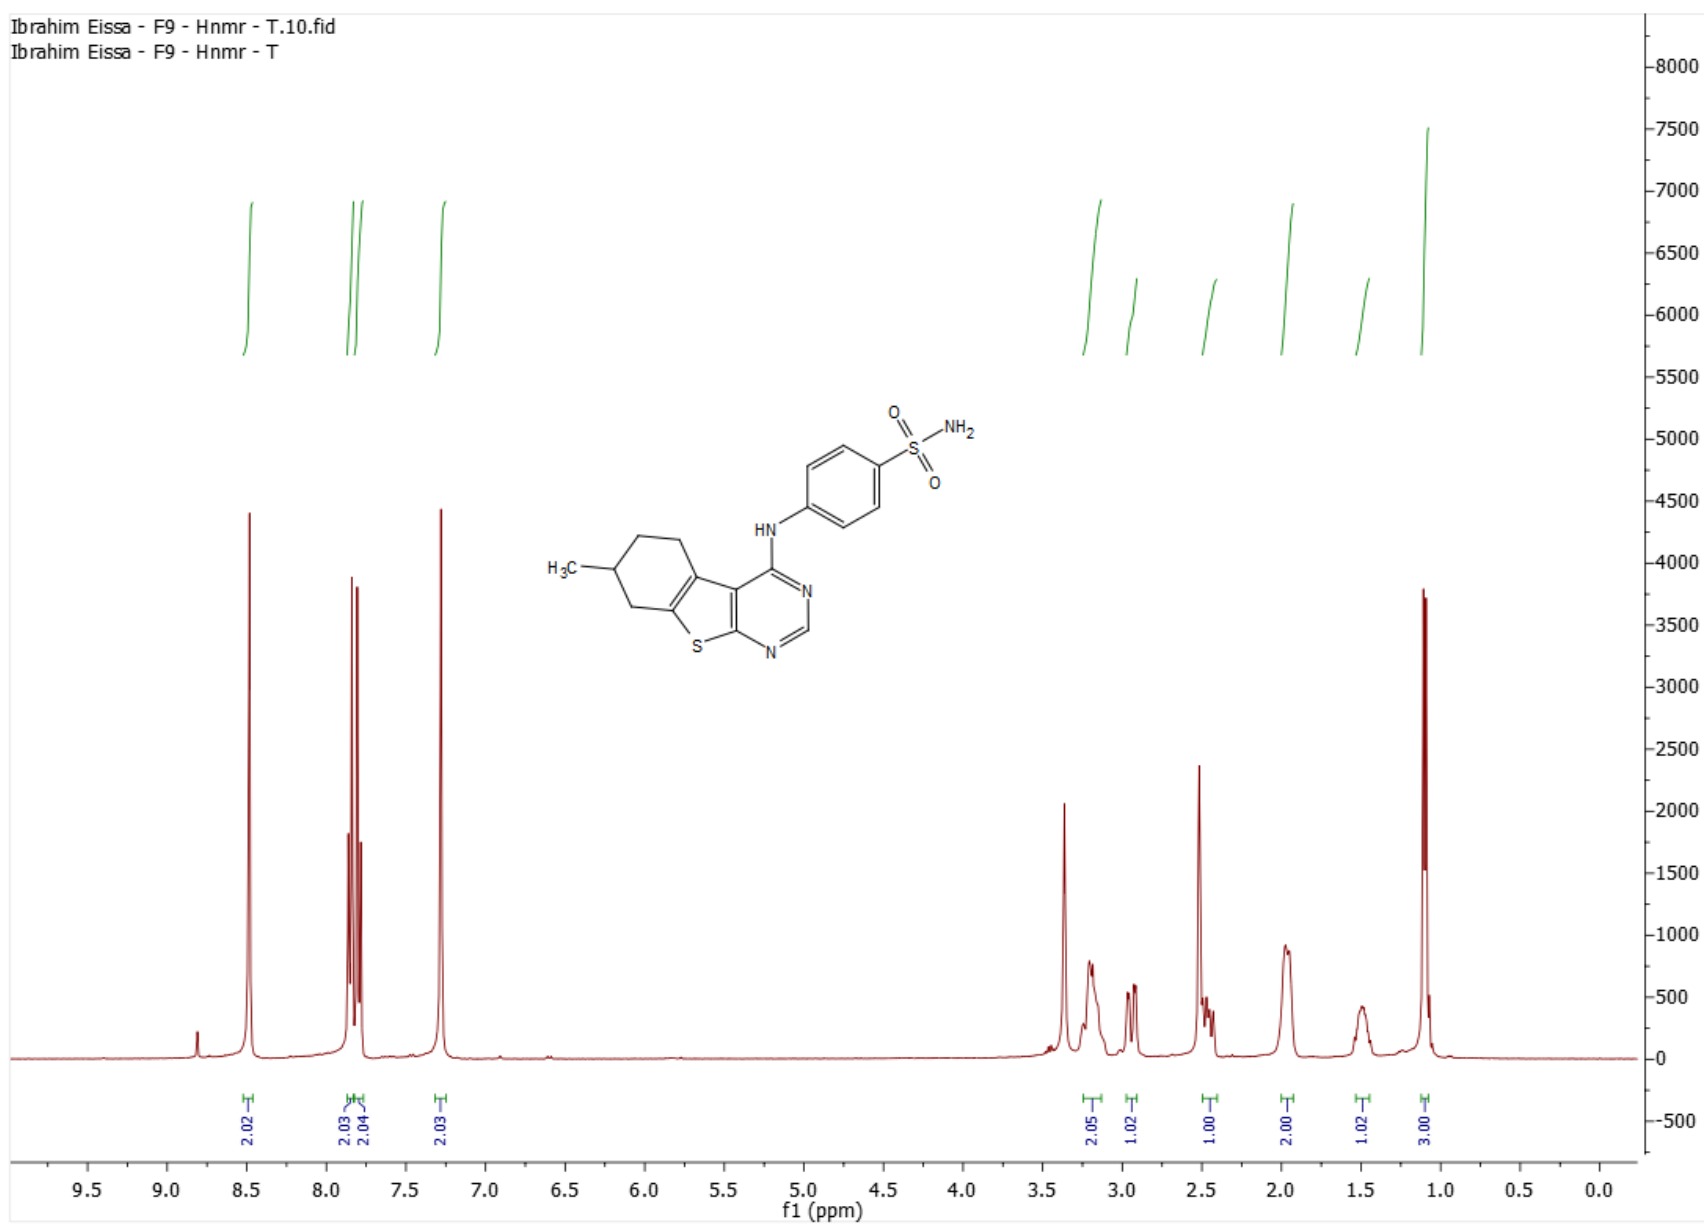

# H1 NMR of compound 6

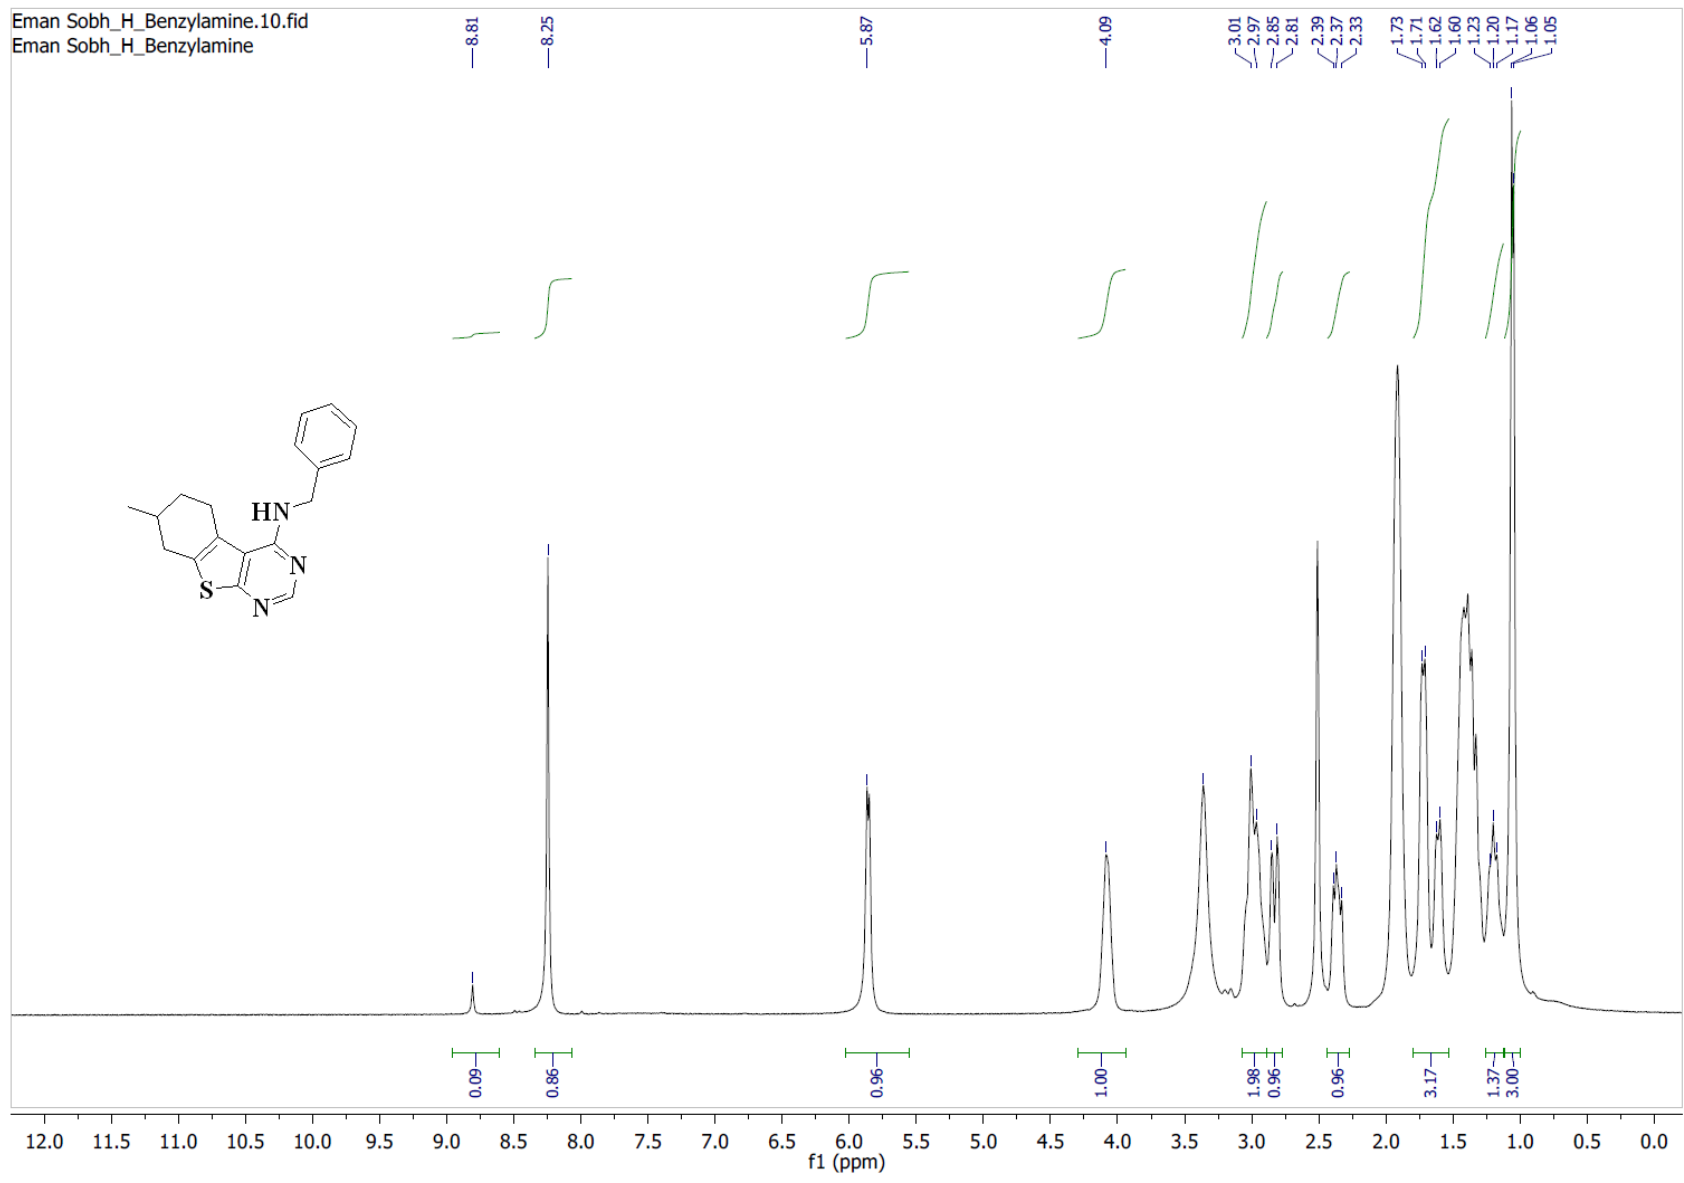

# H1 NMR of compound 7a

Ibrahim Eissa-F7-Hnmr-RR.10.fid  
Ibrahim Eissa-F7-Hnmr-RR

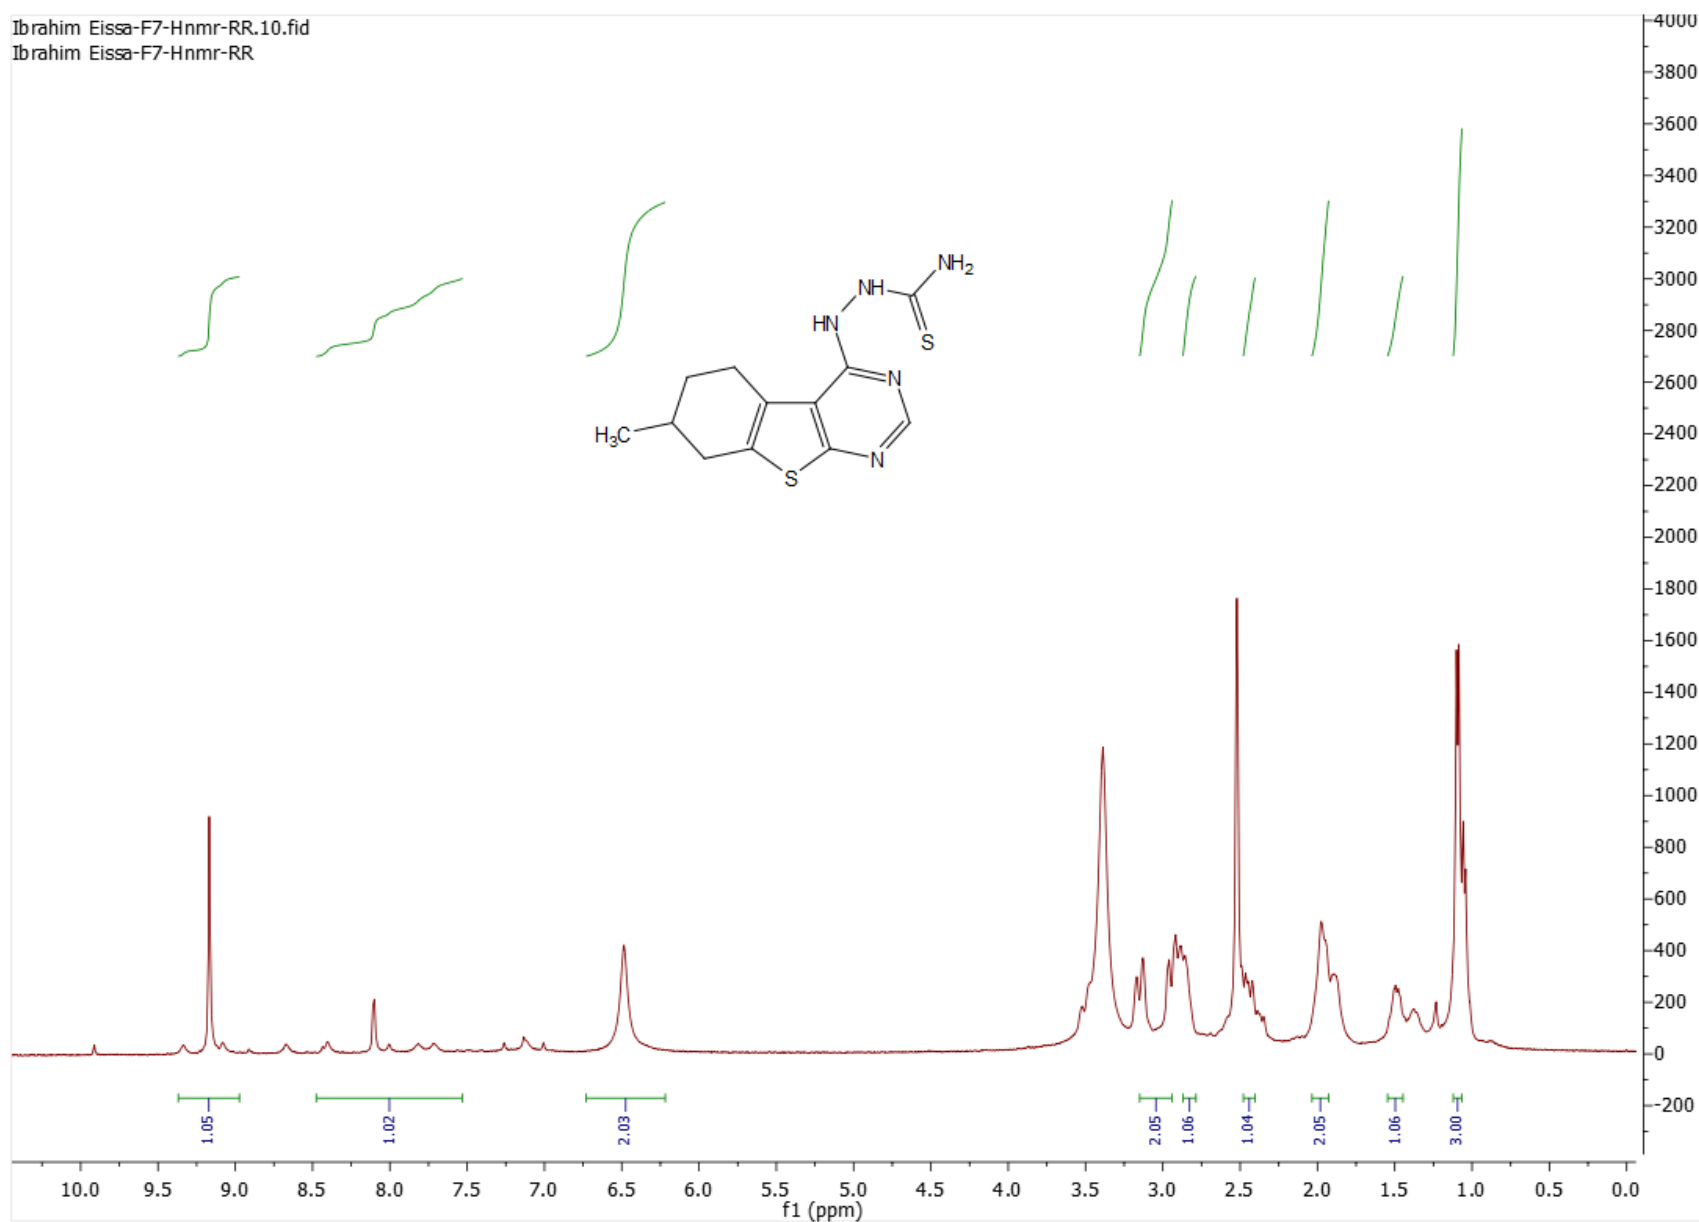

# H1 NMR of compound 7b

Ibrahim Eissa - F10 - Hnmr - T.10.fid  
Ibrahim Eissa - F10 - Hnmr - T

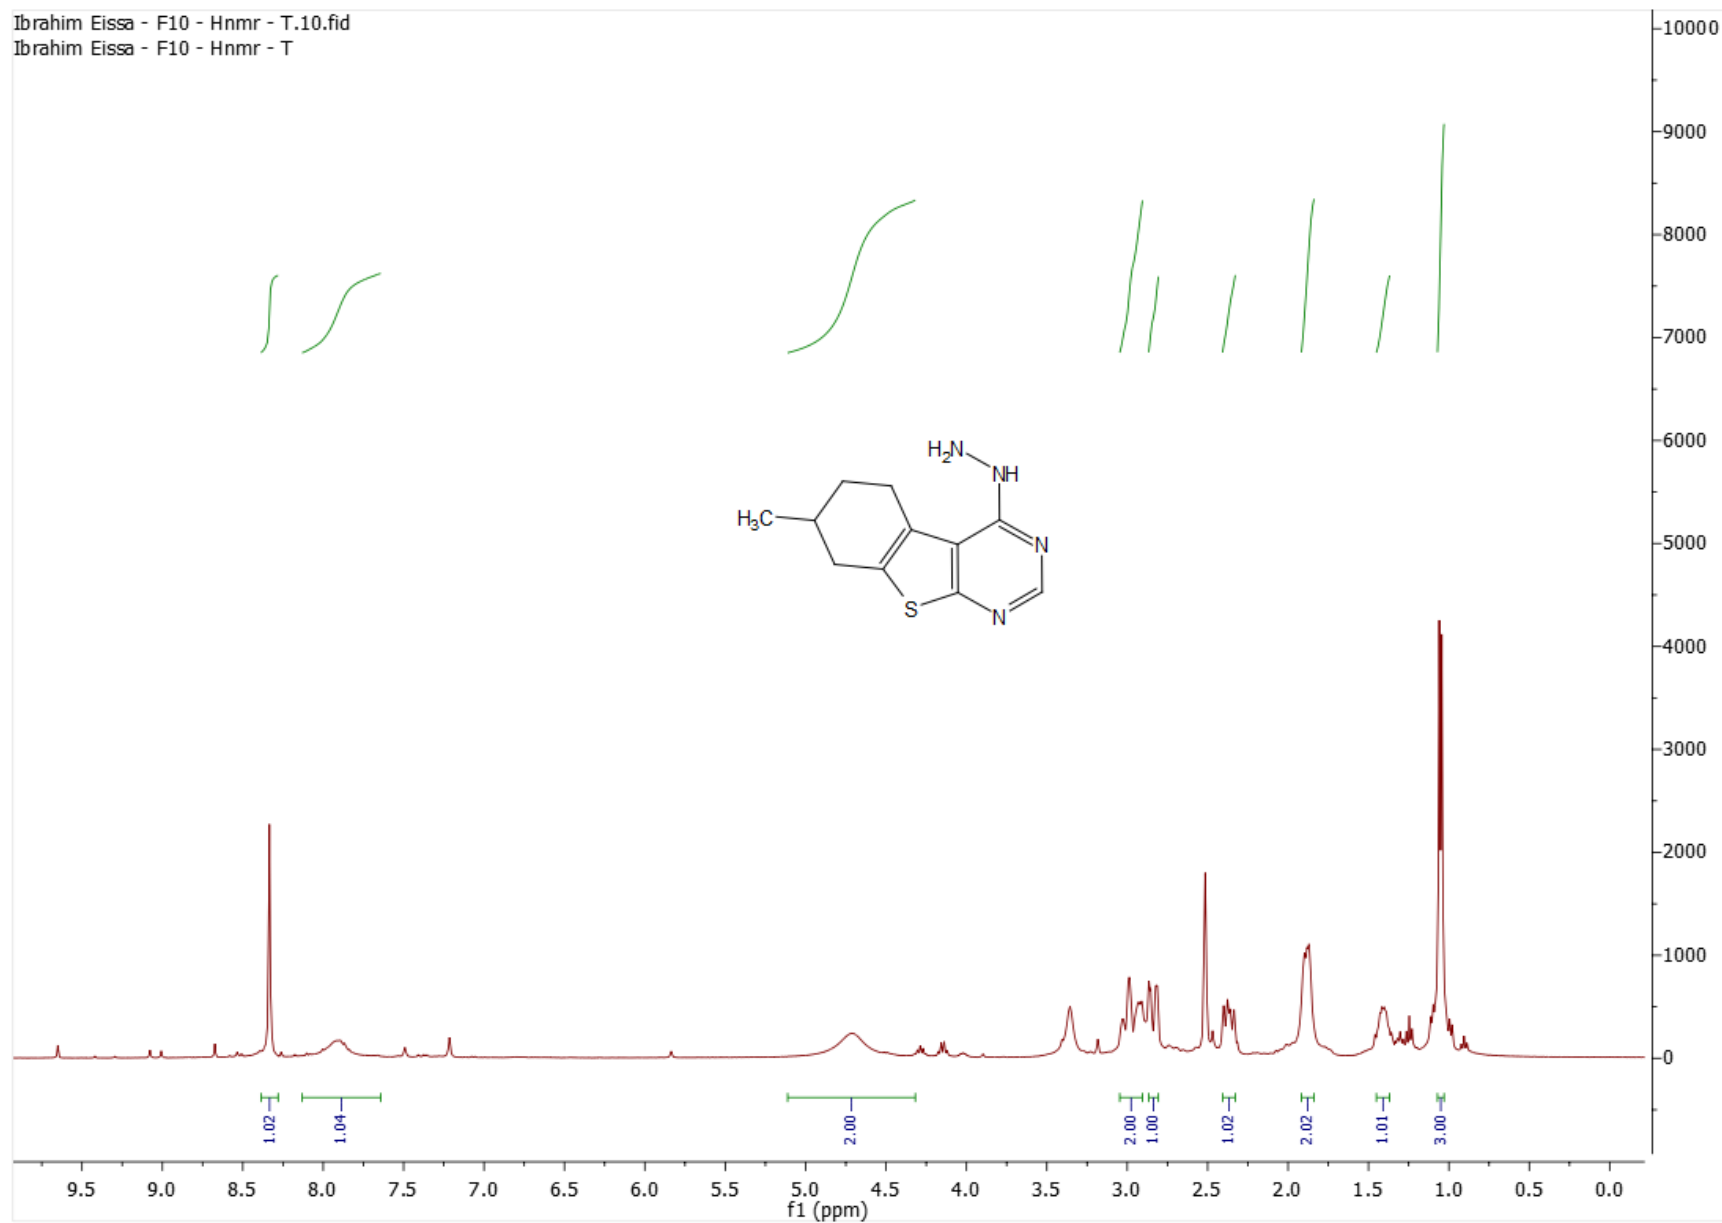

# H1 NMR of compound 8

Eman Sobh\_H\_X.10.fid  
Eman Sobh\_H\_X

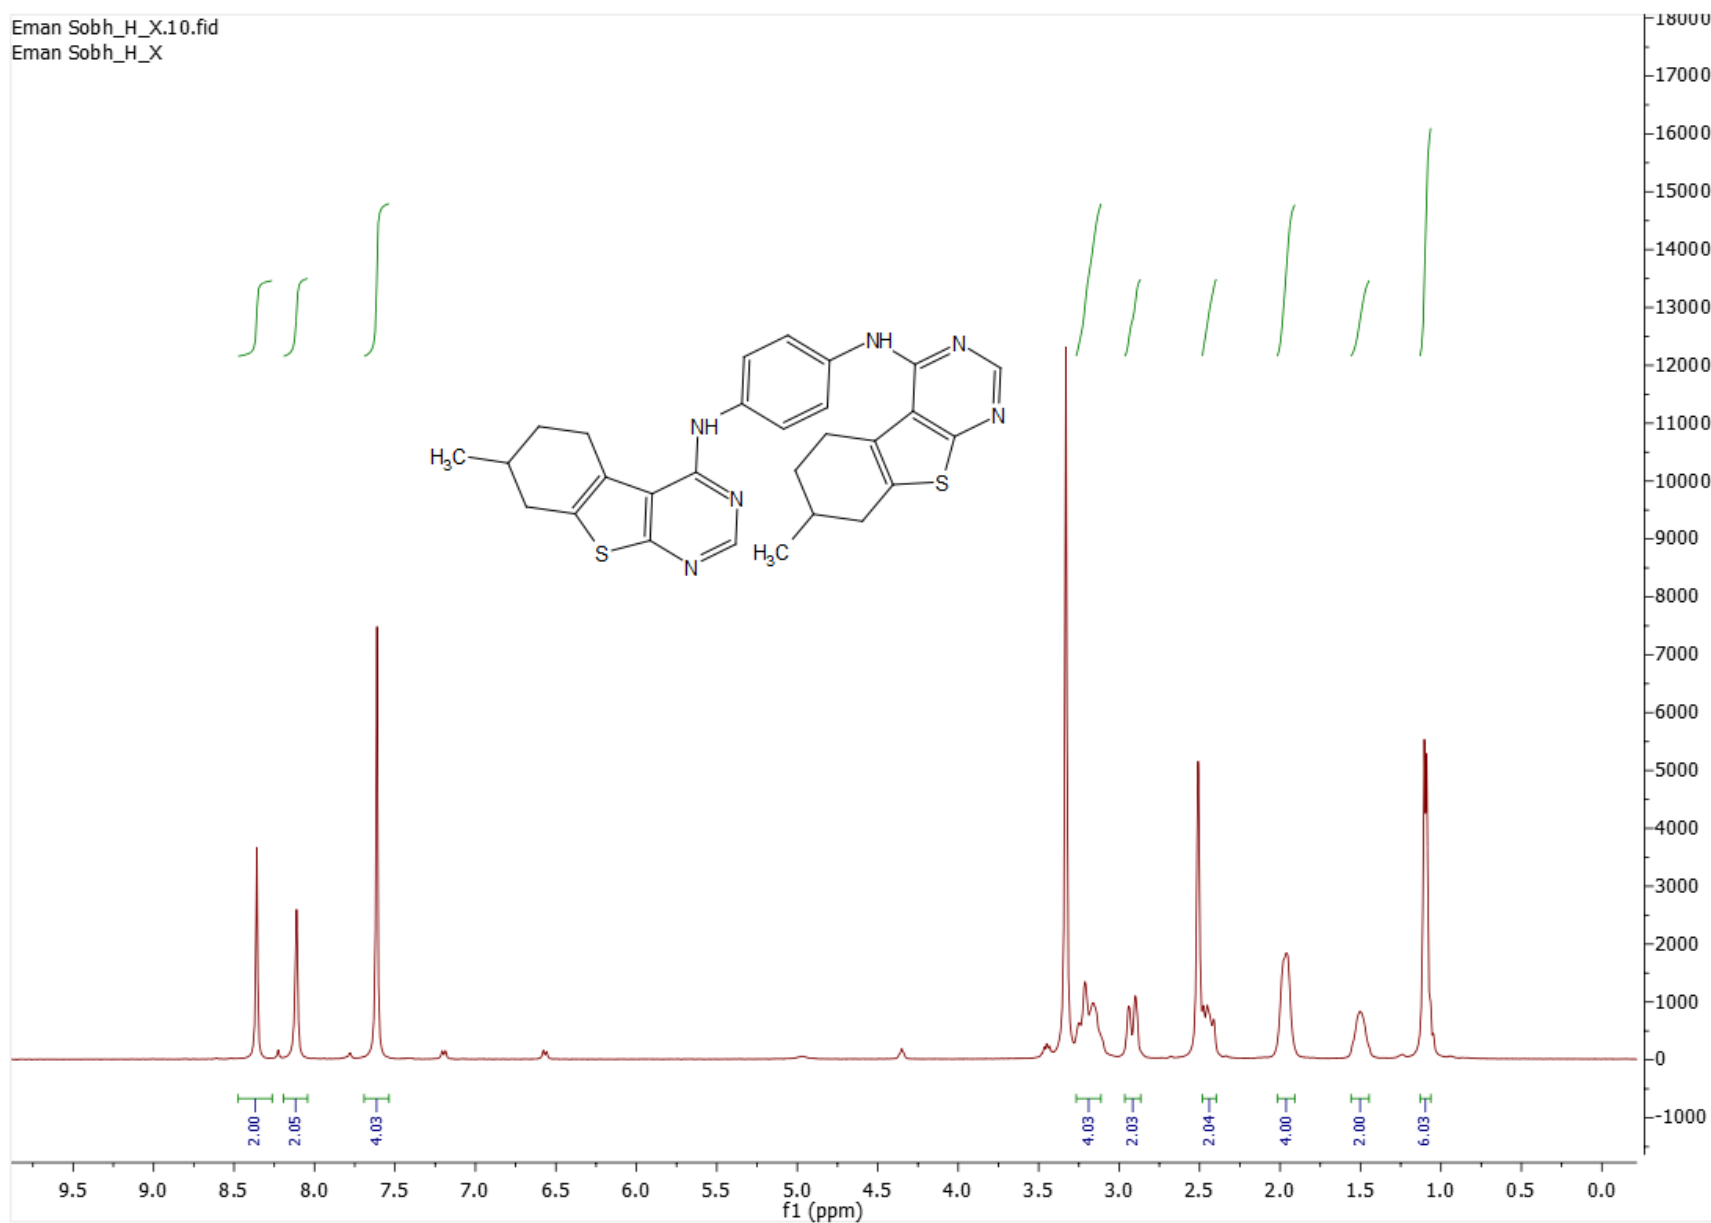

# <sup>13</sup>C NMR of compound 4

Ibrahim Eissa - F1 - C13 - T,10.fid  
Ibrahim Eissa - F1 - C13 - T

152.77  
152.25  
144.45  
139.64  
131.19  
128.25

30.17  
29.21  
28.67  
25.99  
21.41

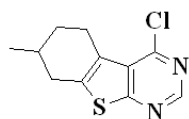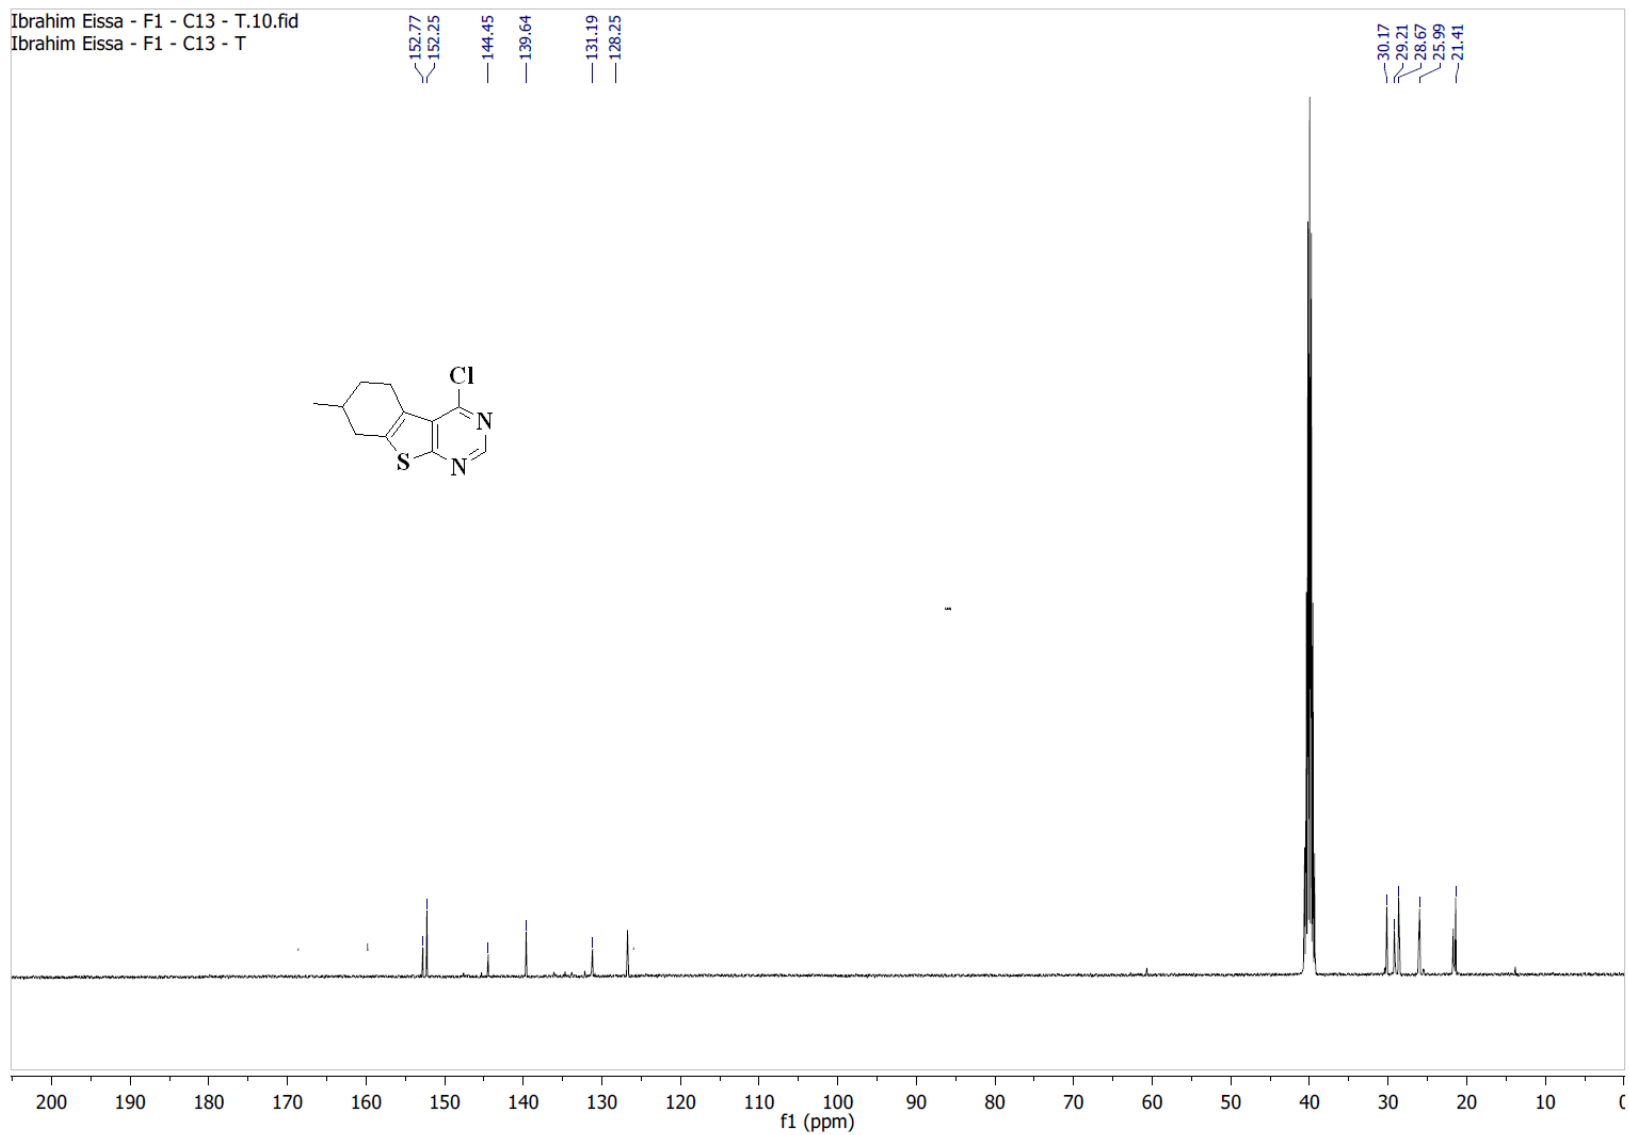

# <sup>13</sup>C NMR of compound 5a

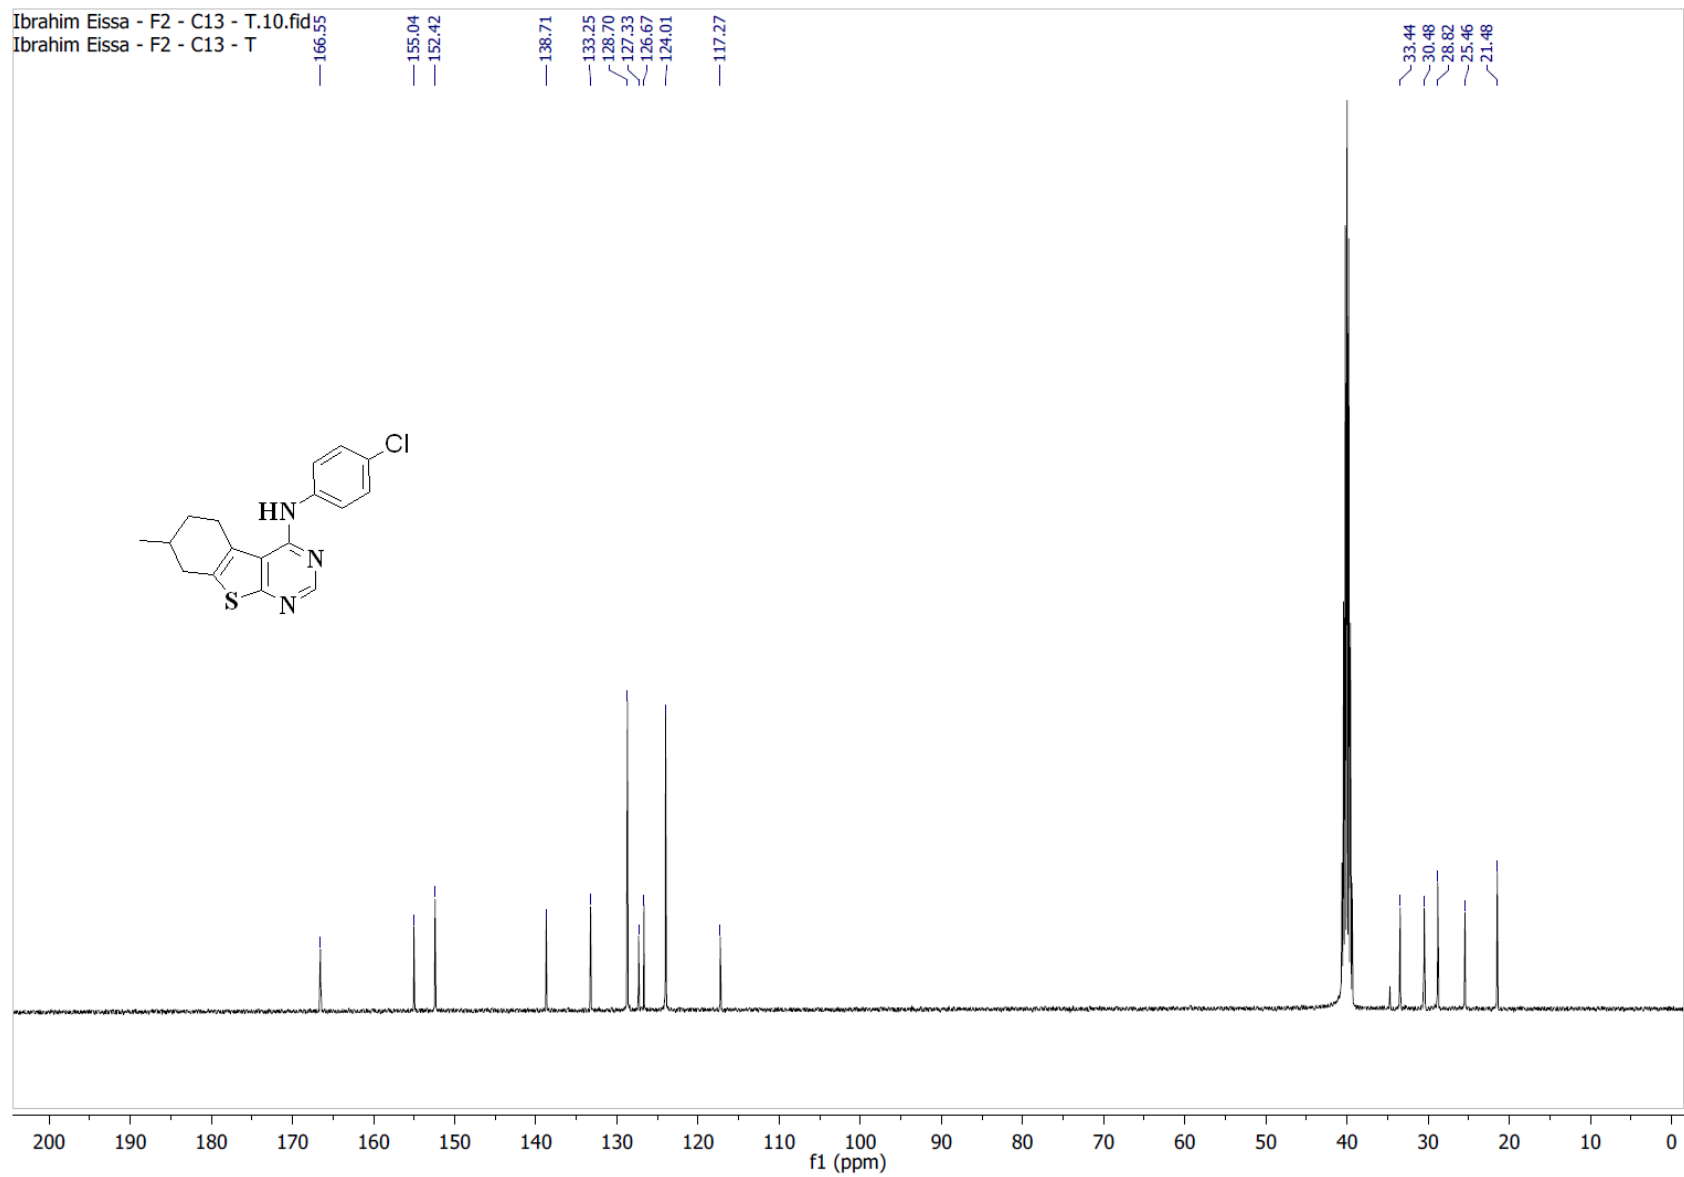



# <sup>13</sup>C NMR of compound 5b

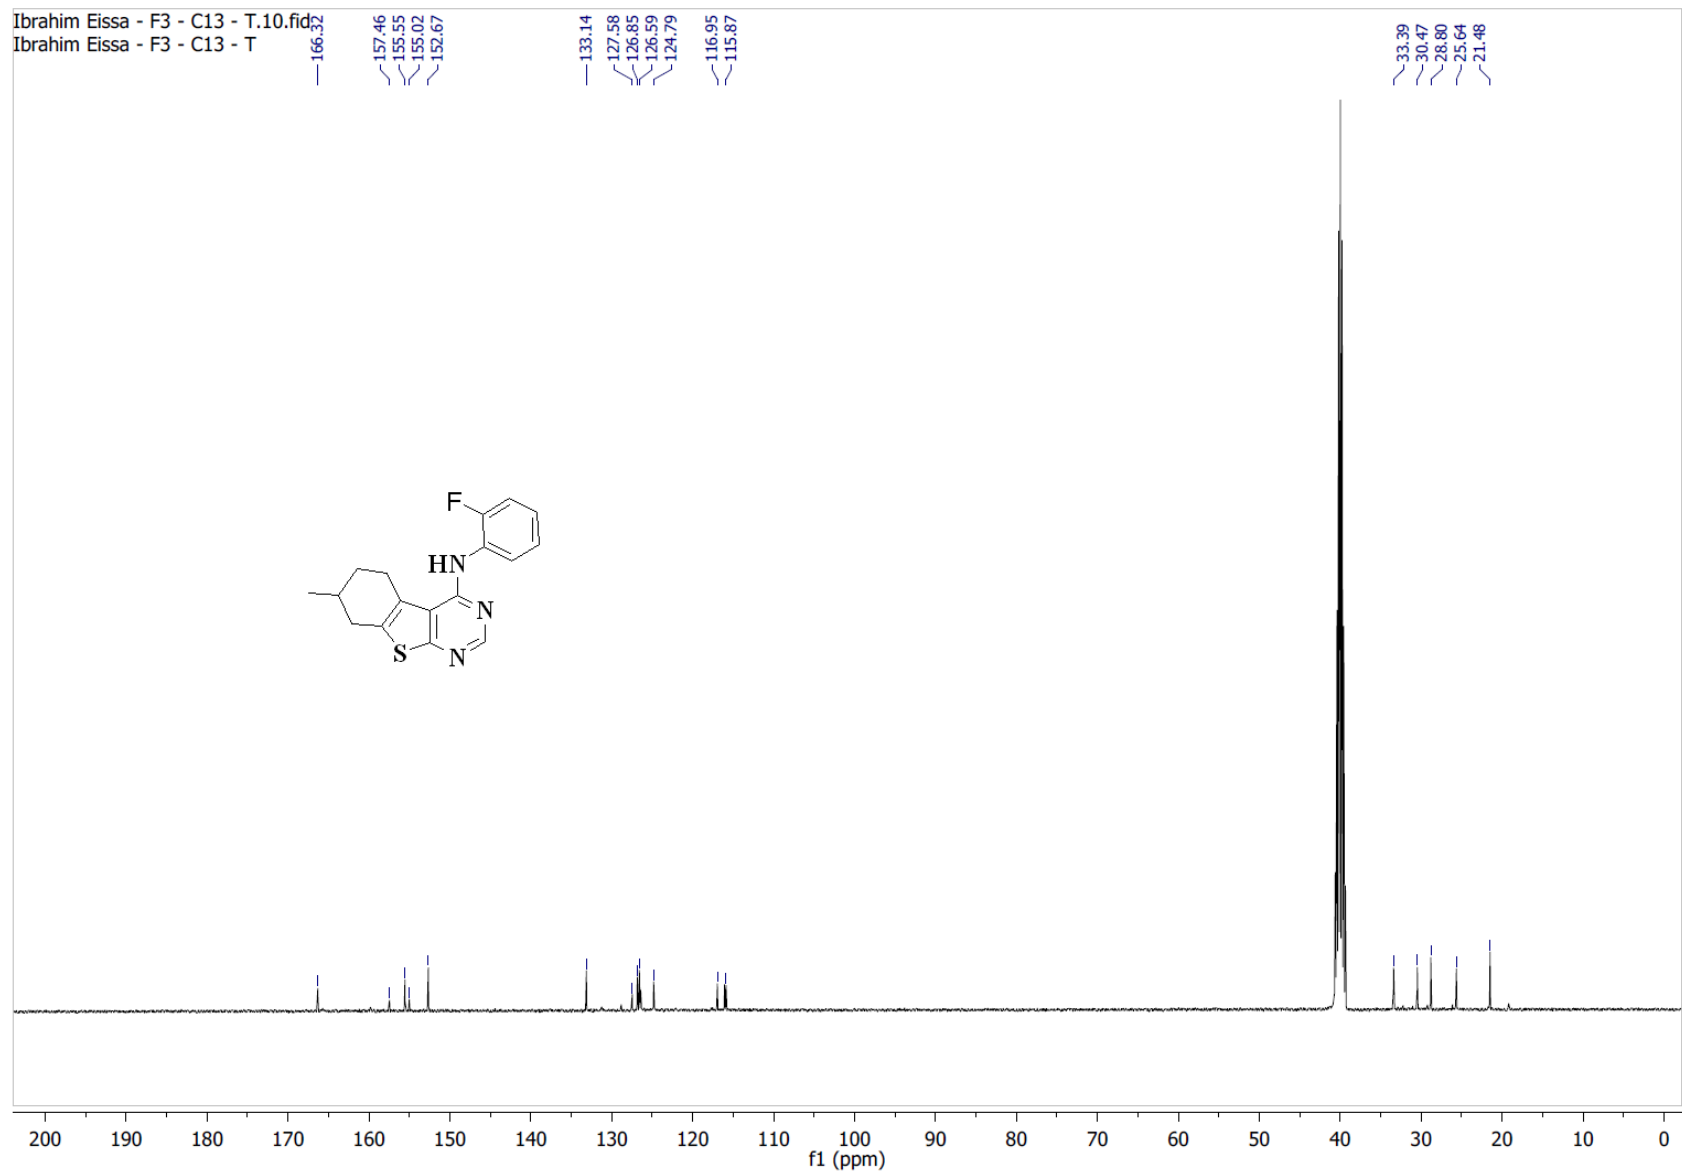

# <sup>13</sup>C NMR of compound 5c

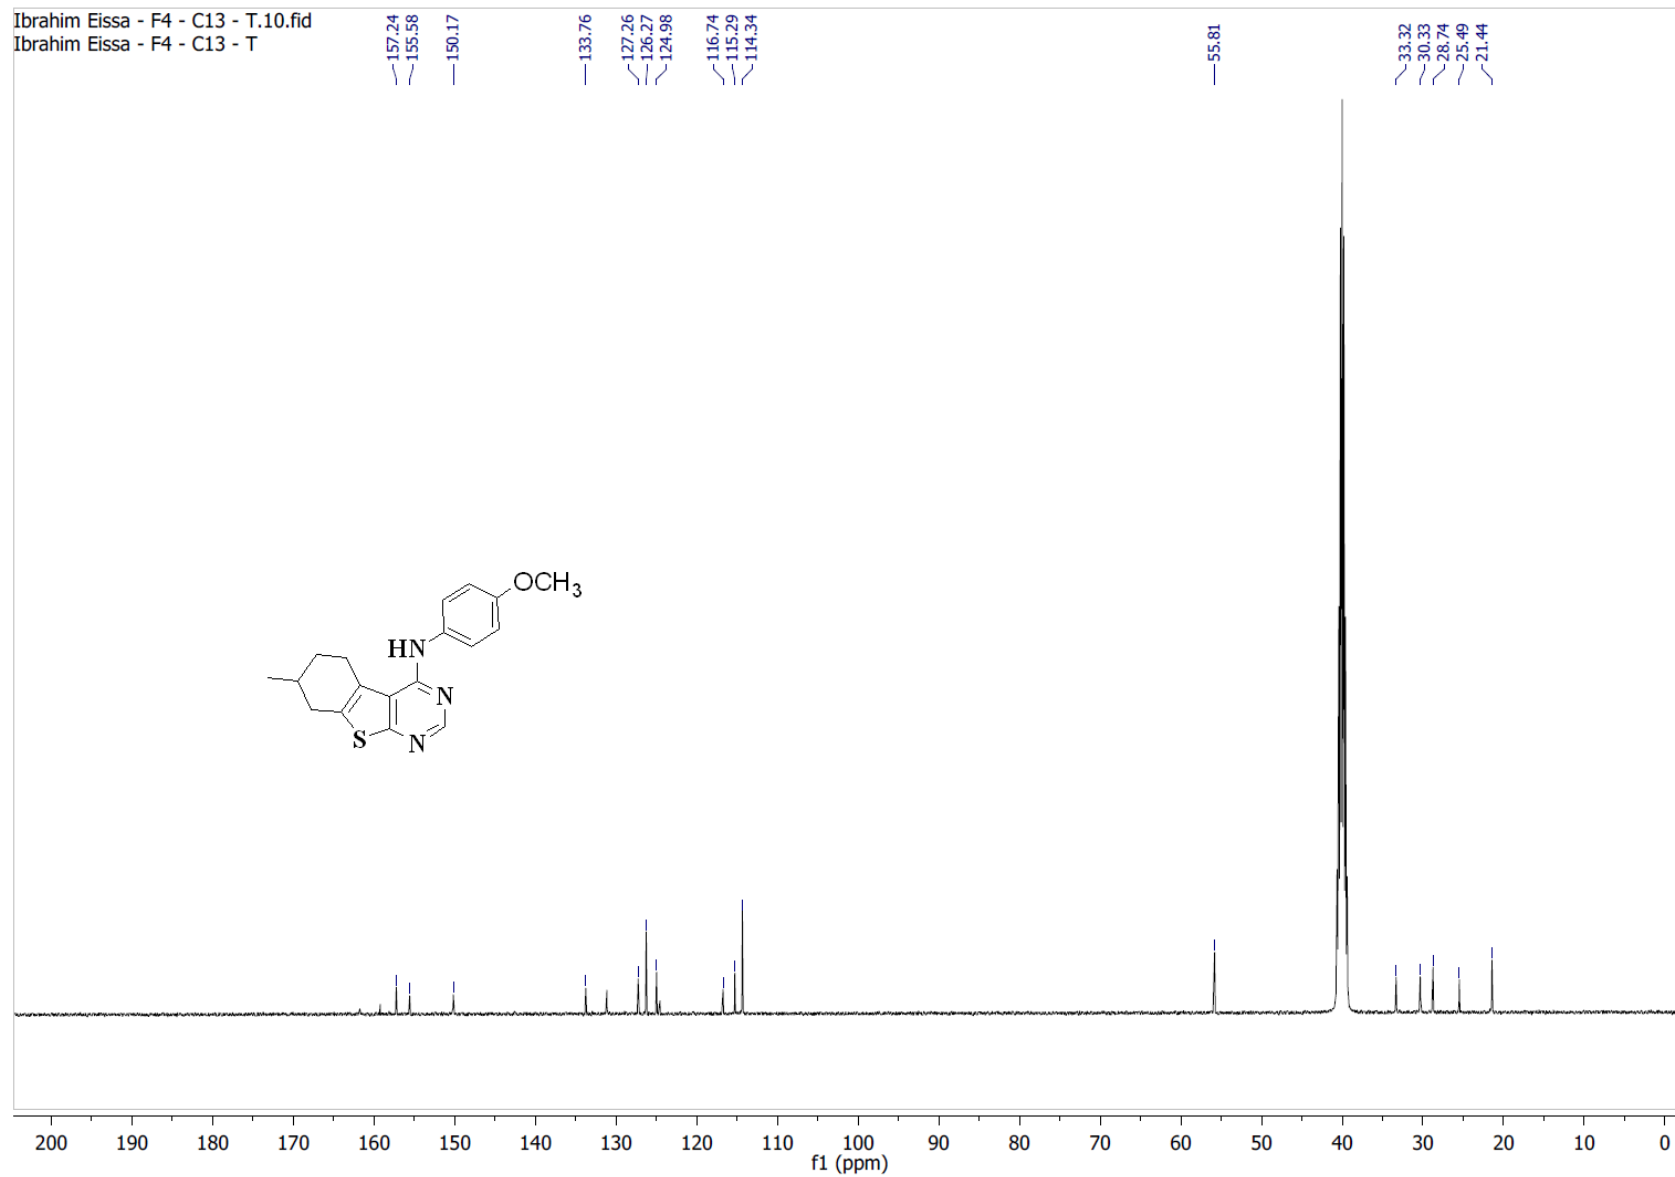

# <sup>13</sup>C NMR of compound 5d

Ibrahim Eissa - F5 - C13 - T.10.f2  
Ibrahim Eissa - F5 - C13 - T

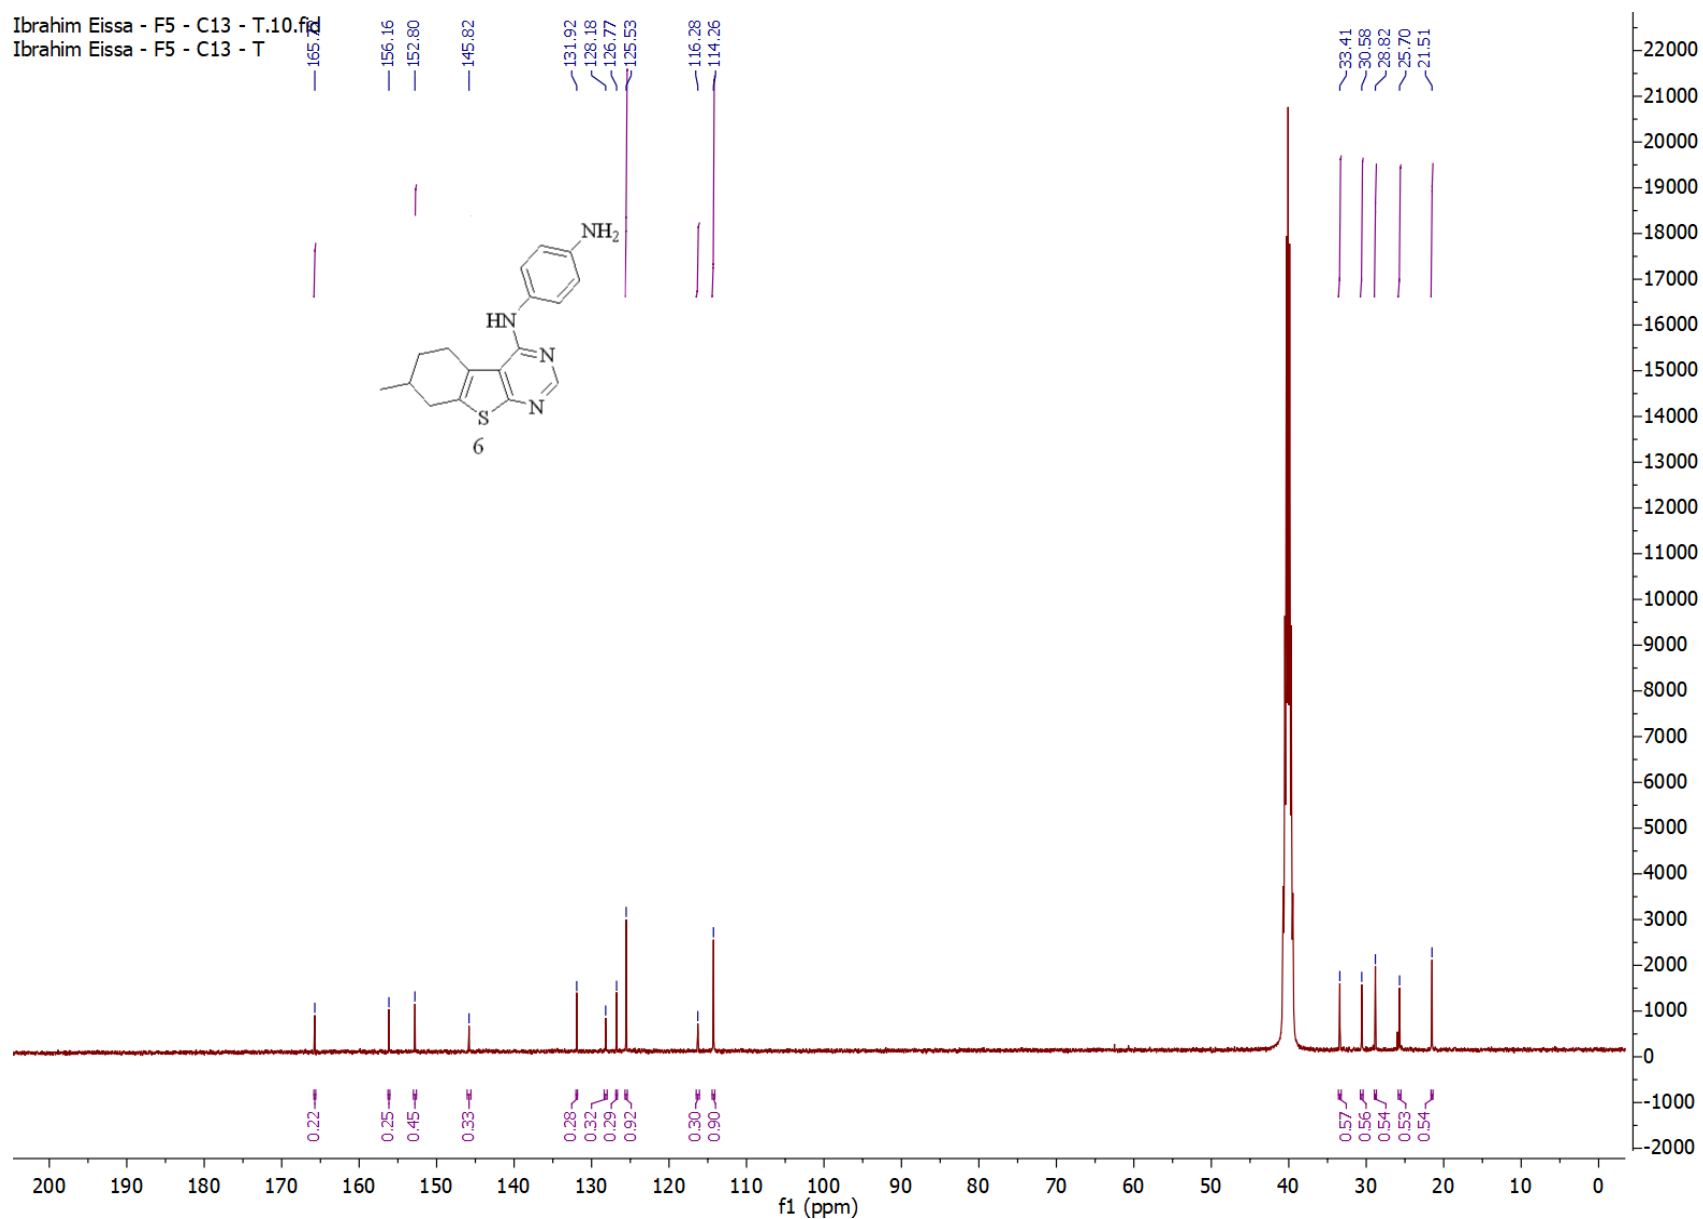

# <sup>13</sup>C NMR of compound 5e

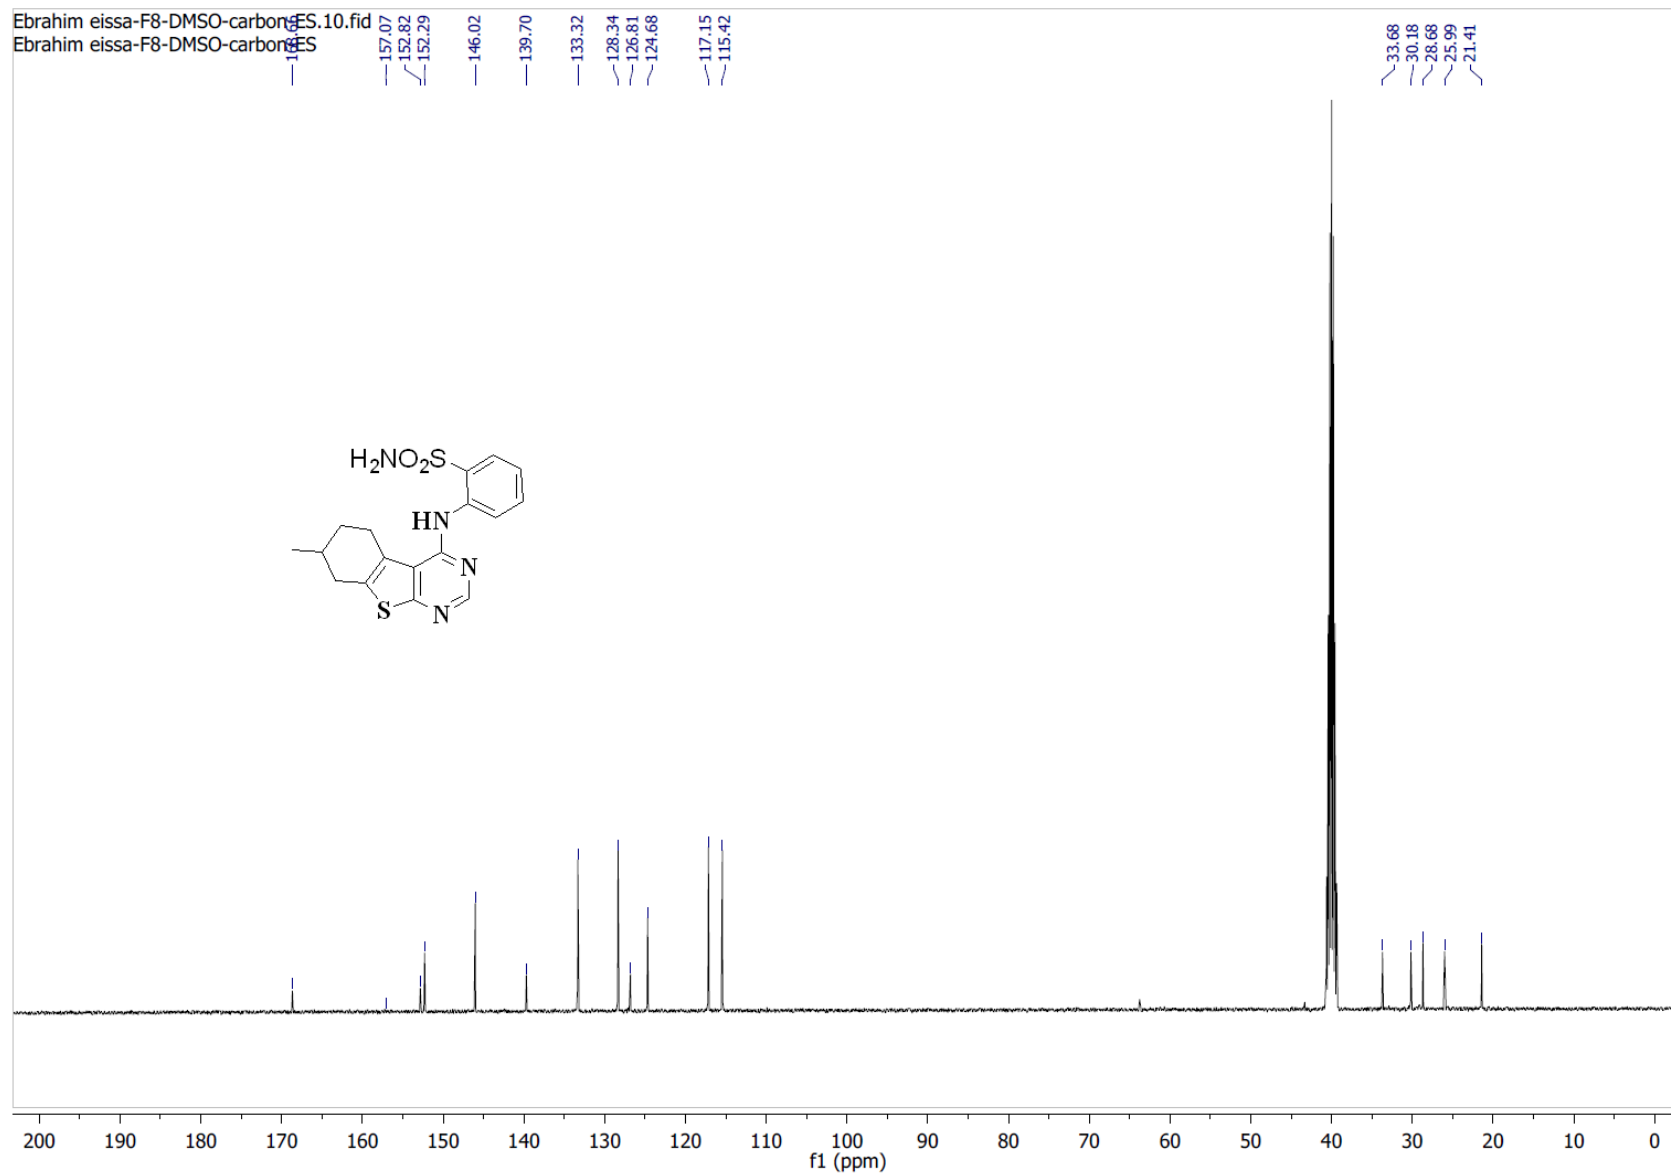

# <sup>13</sup>C NMR of compound 5f

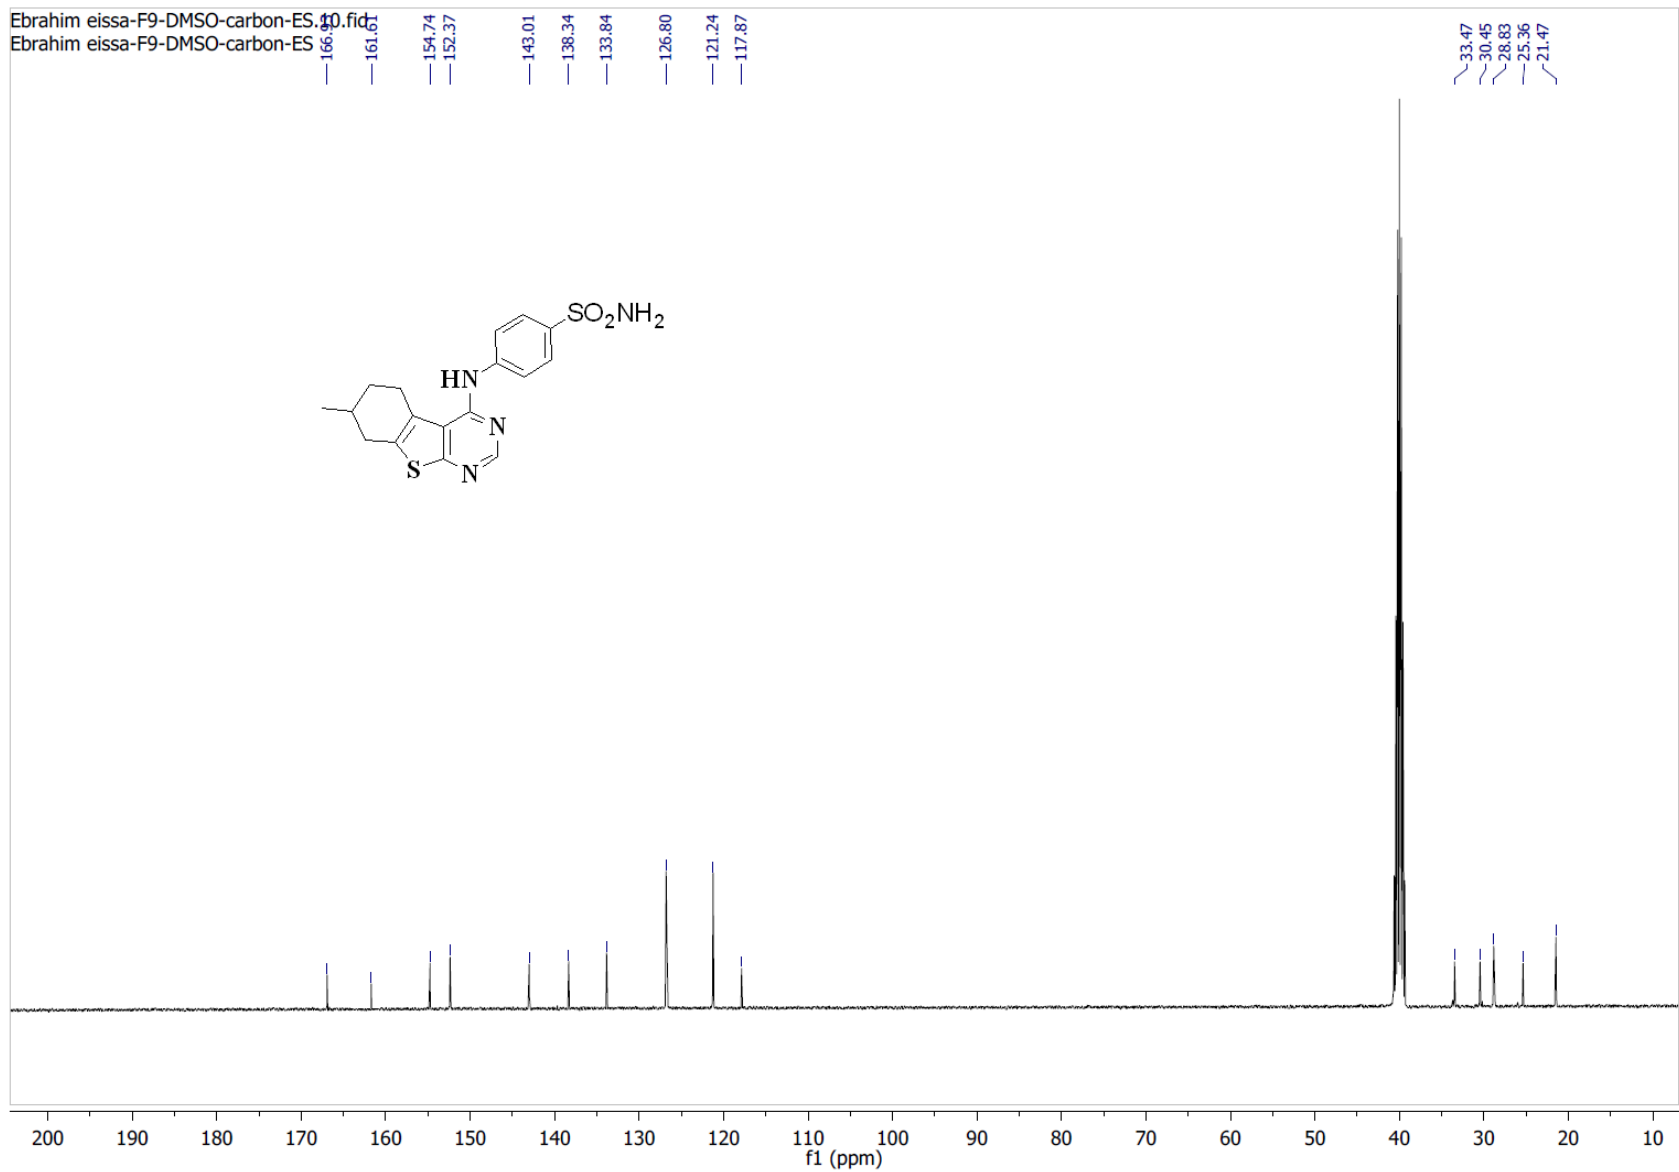

# <sup>13</sup>C NMR of compound 6

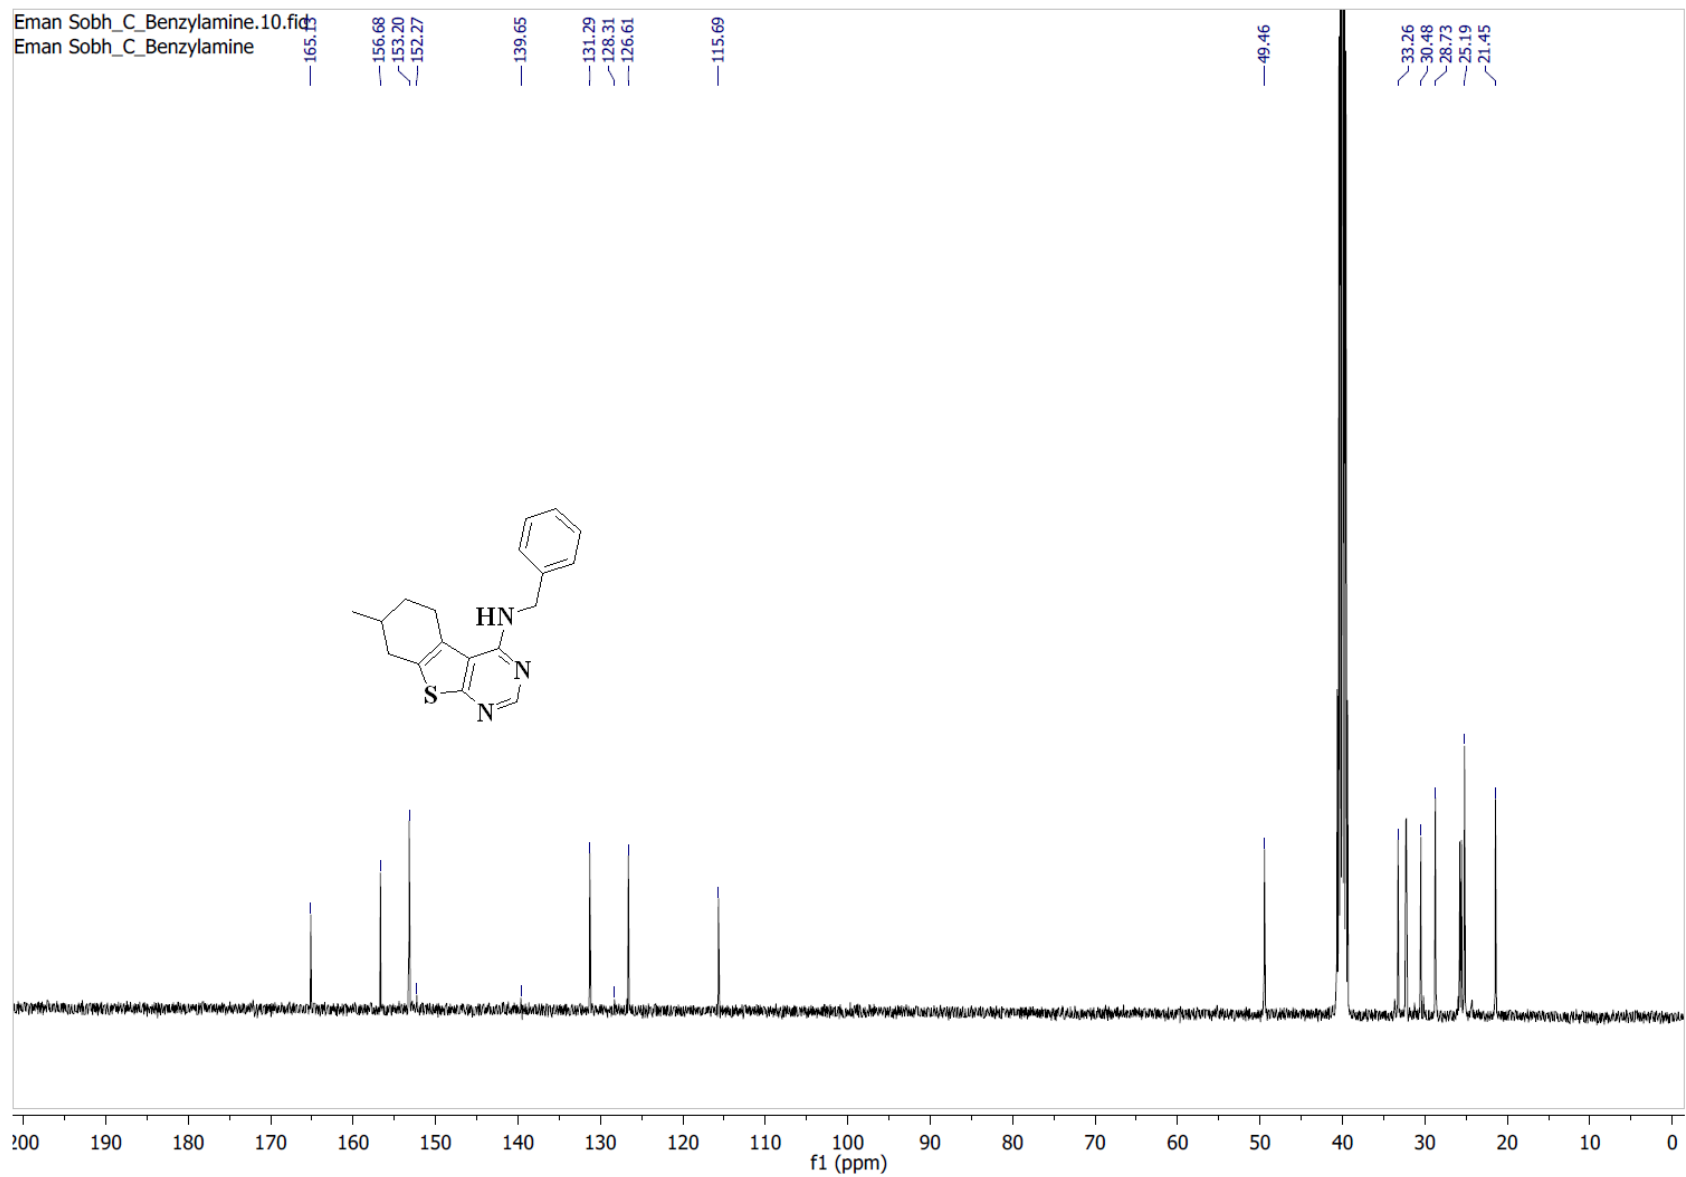

# <sup>13</sup>C NMR of compound 7a

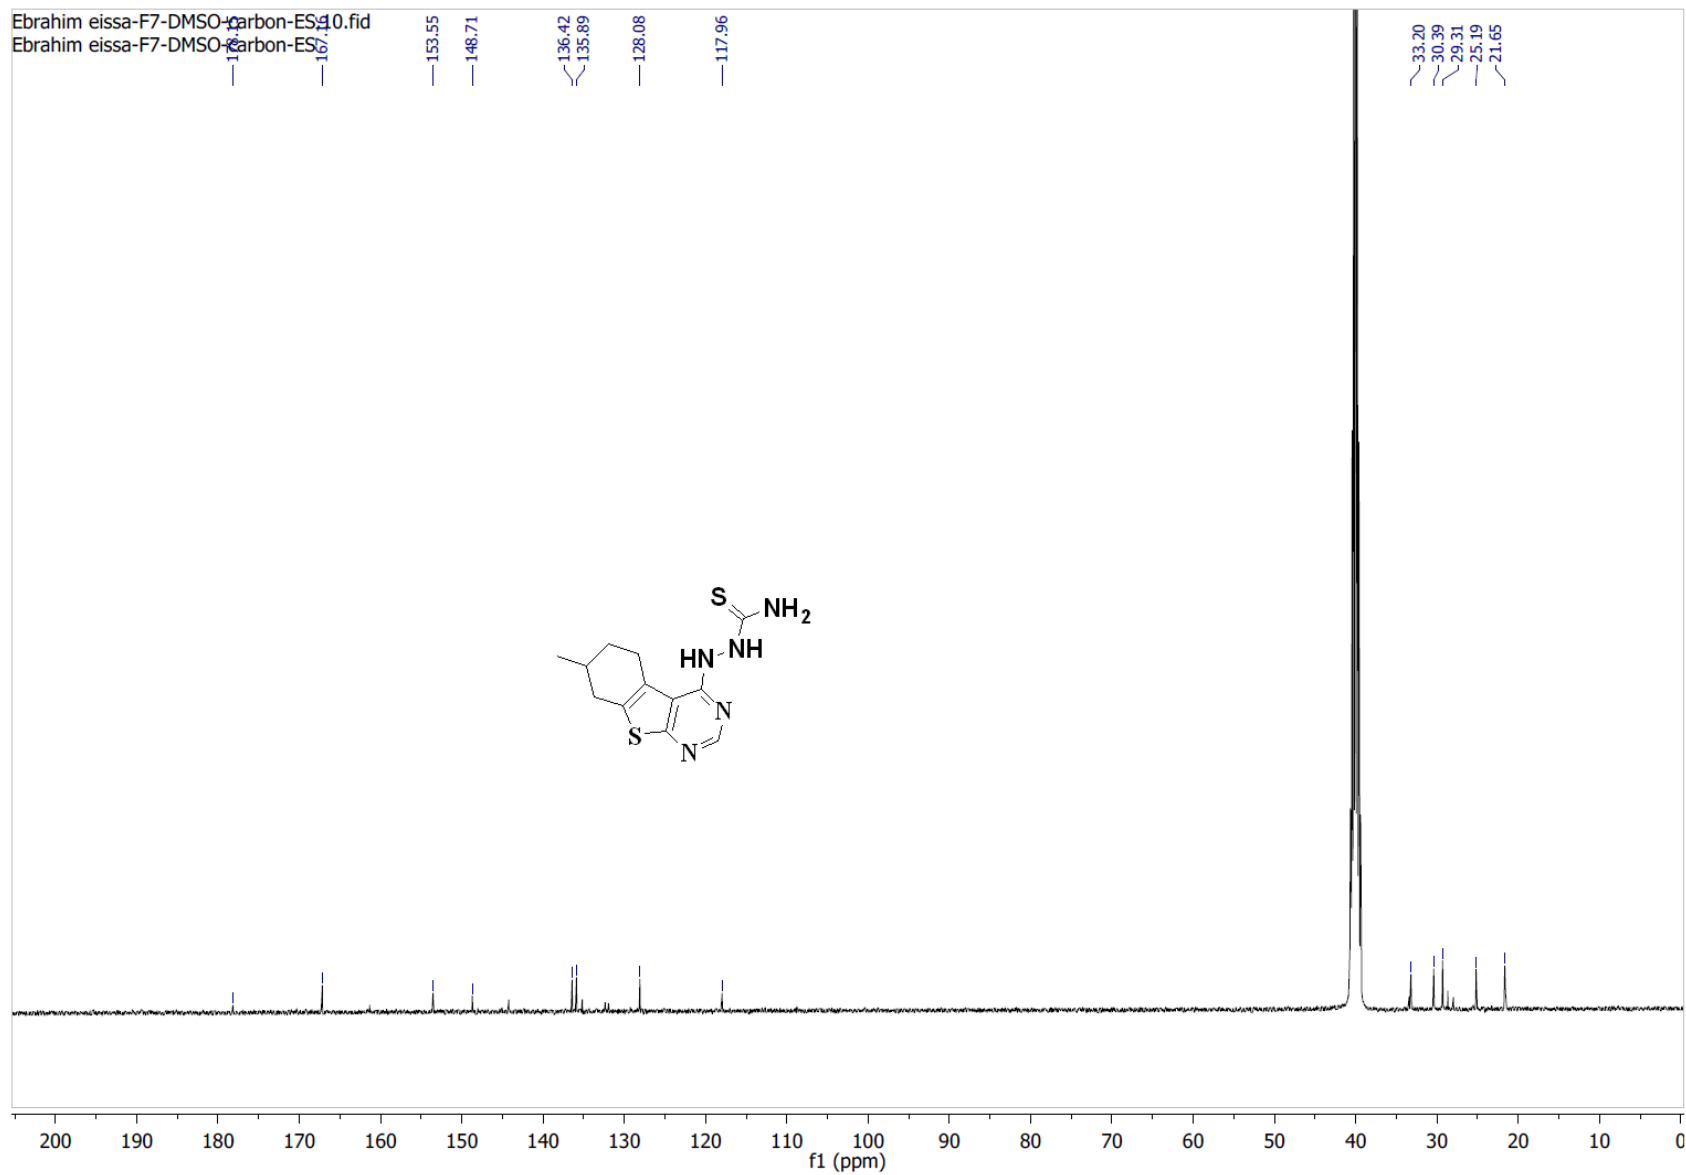

# <sup>13</sup>C NMR of compound 7b

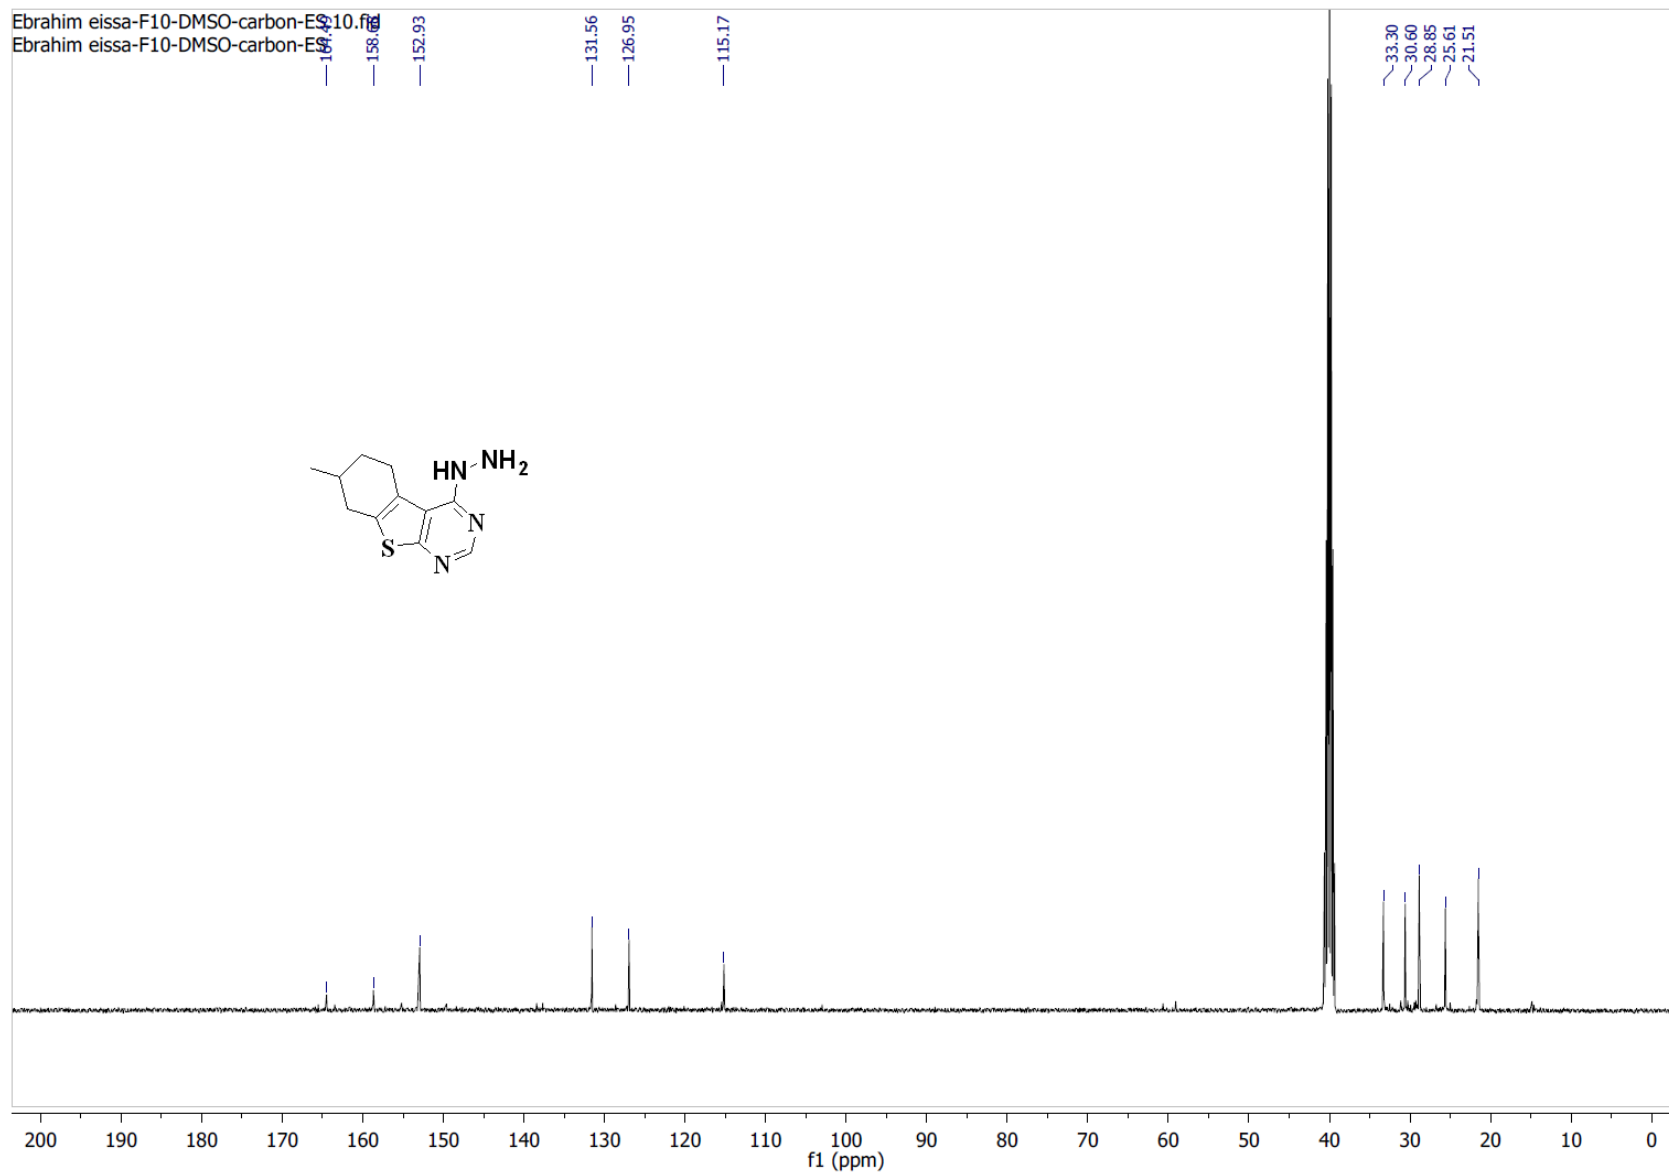



# <sup>13</sup>C NMR of compound 8

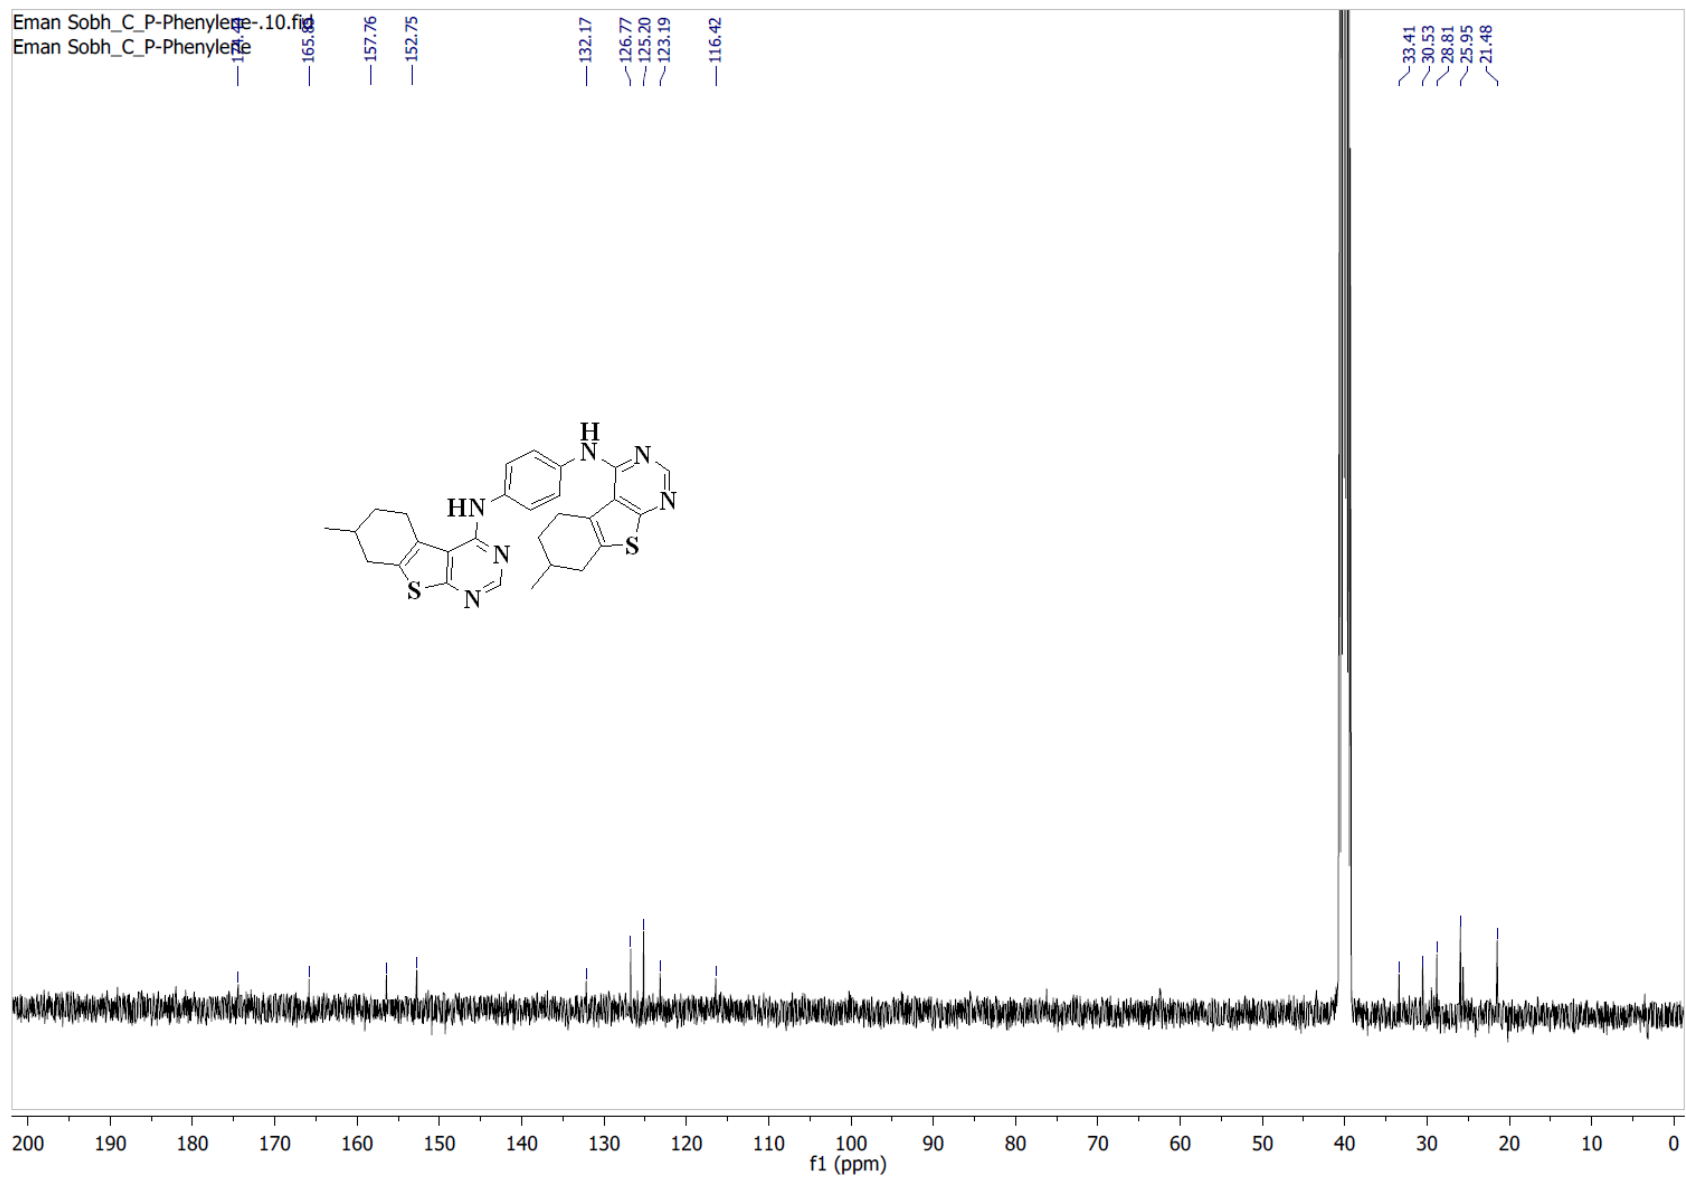

# IR spectra of compound 4

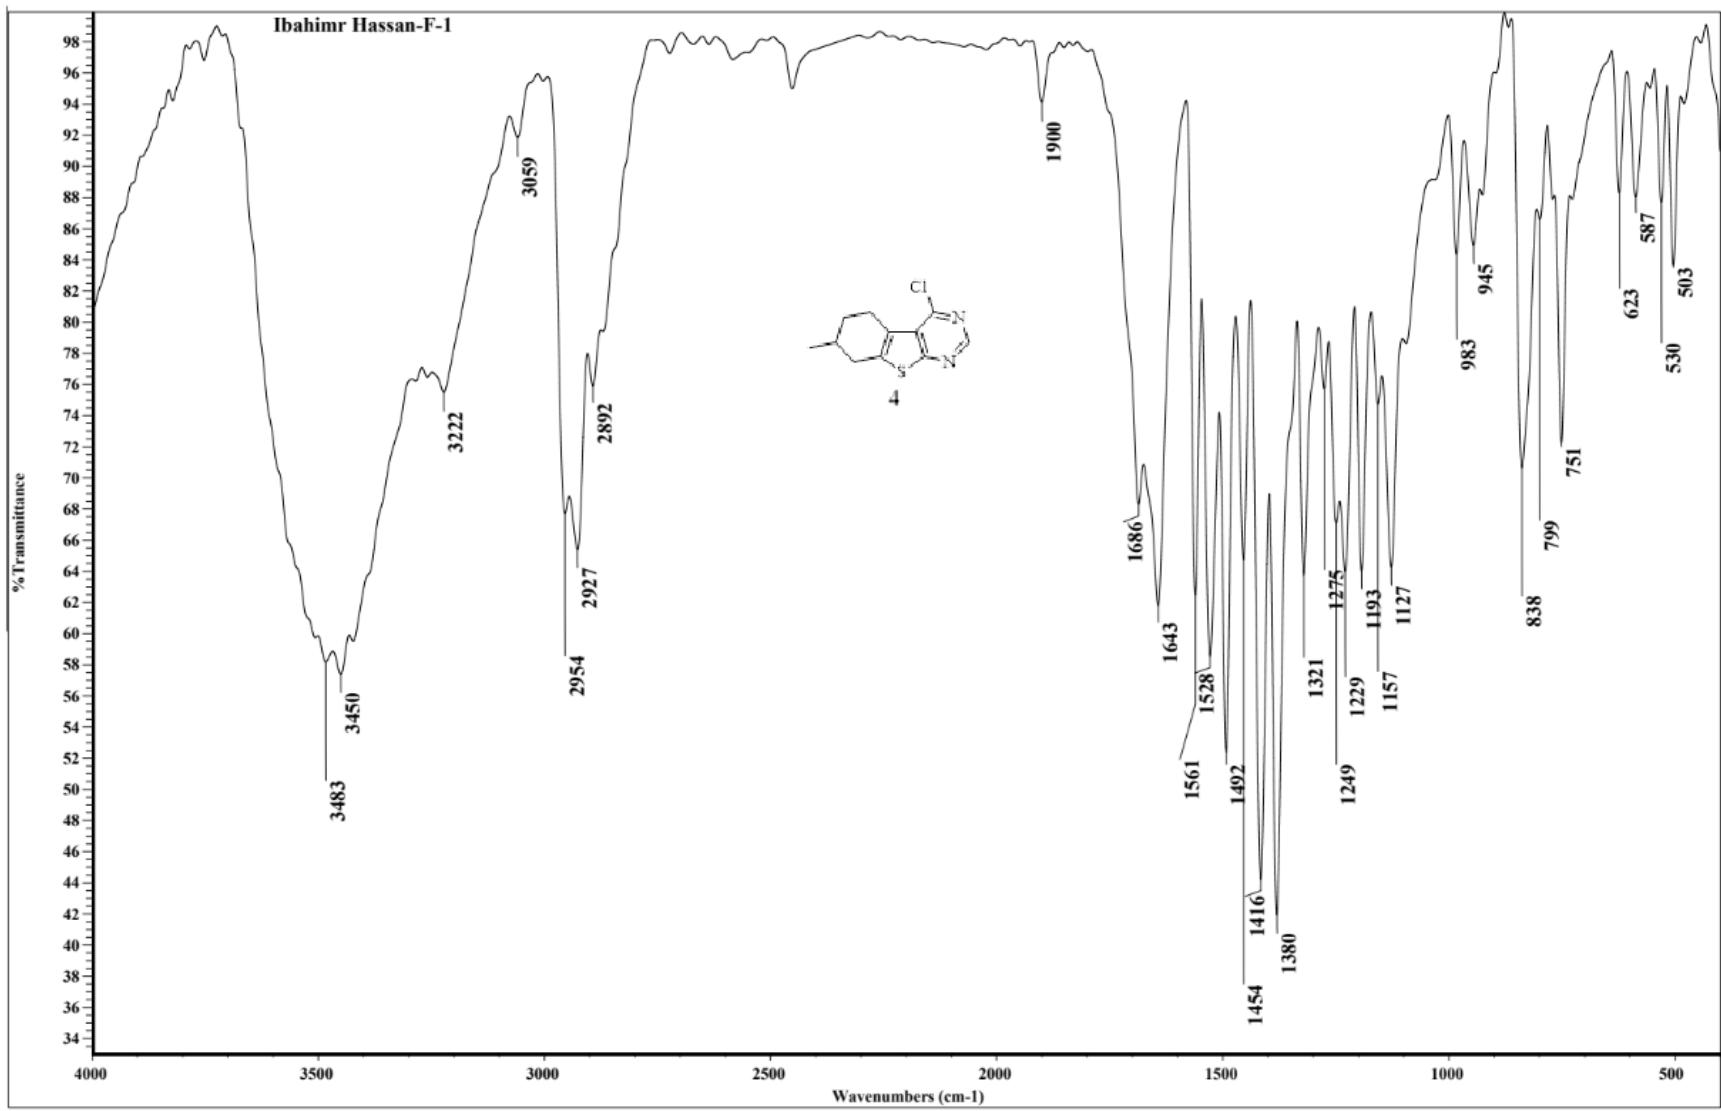

# IR spectra of compound 5b

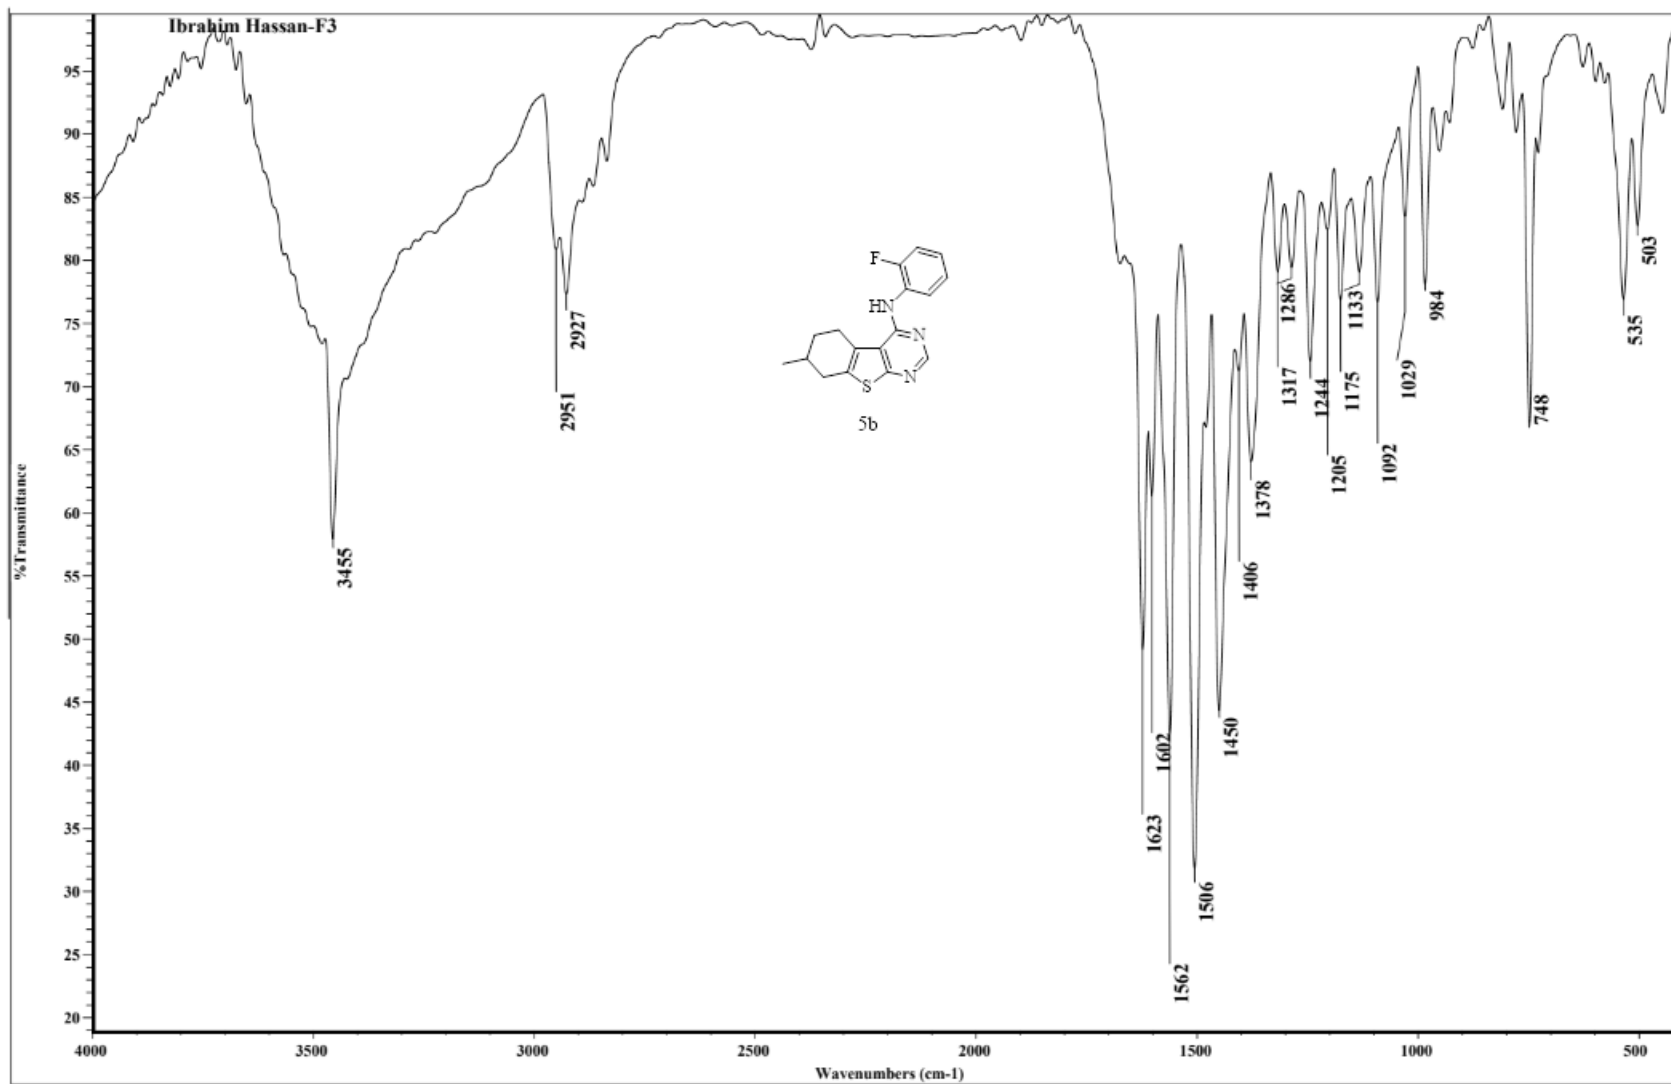

# IR spectra of compound 5c

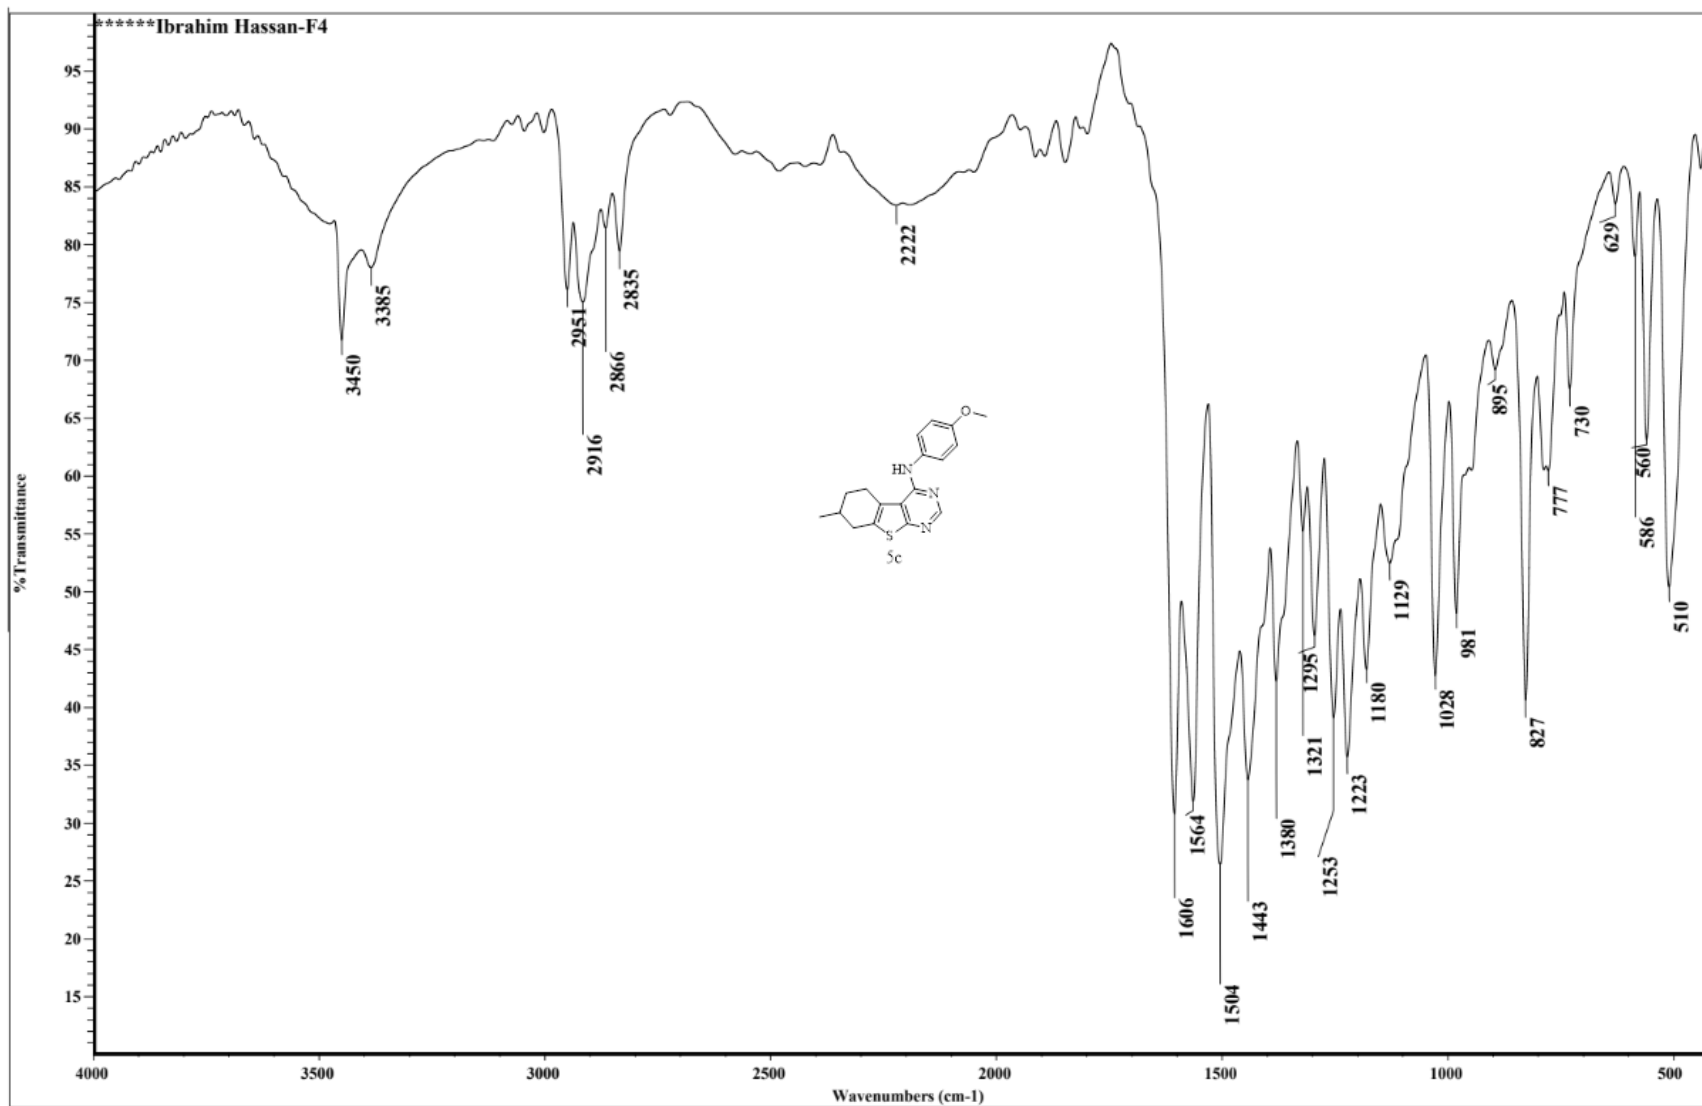

## IR spectra of compound 5d

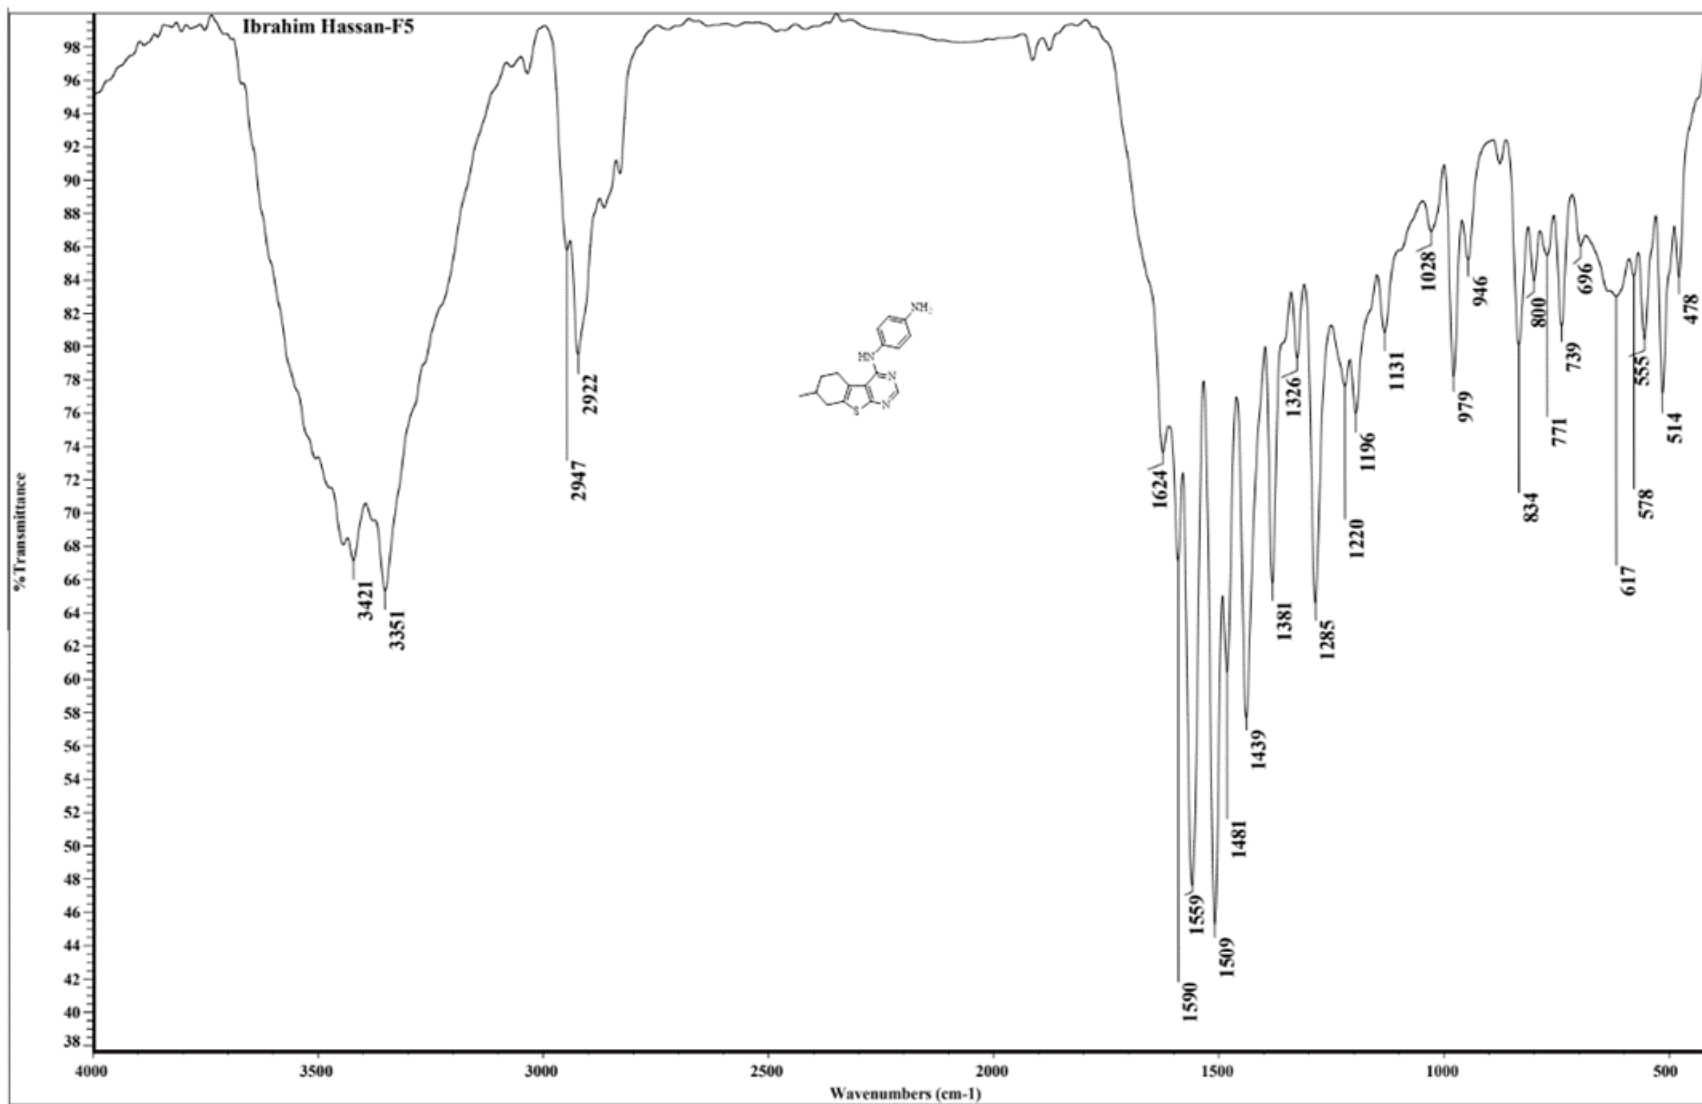

# IR spectra of compound 6

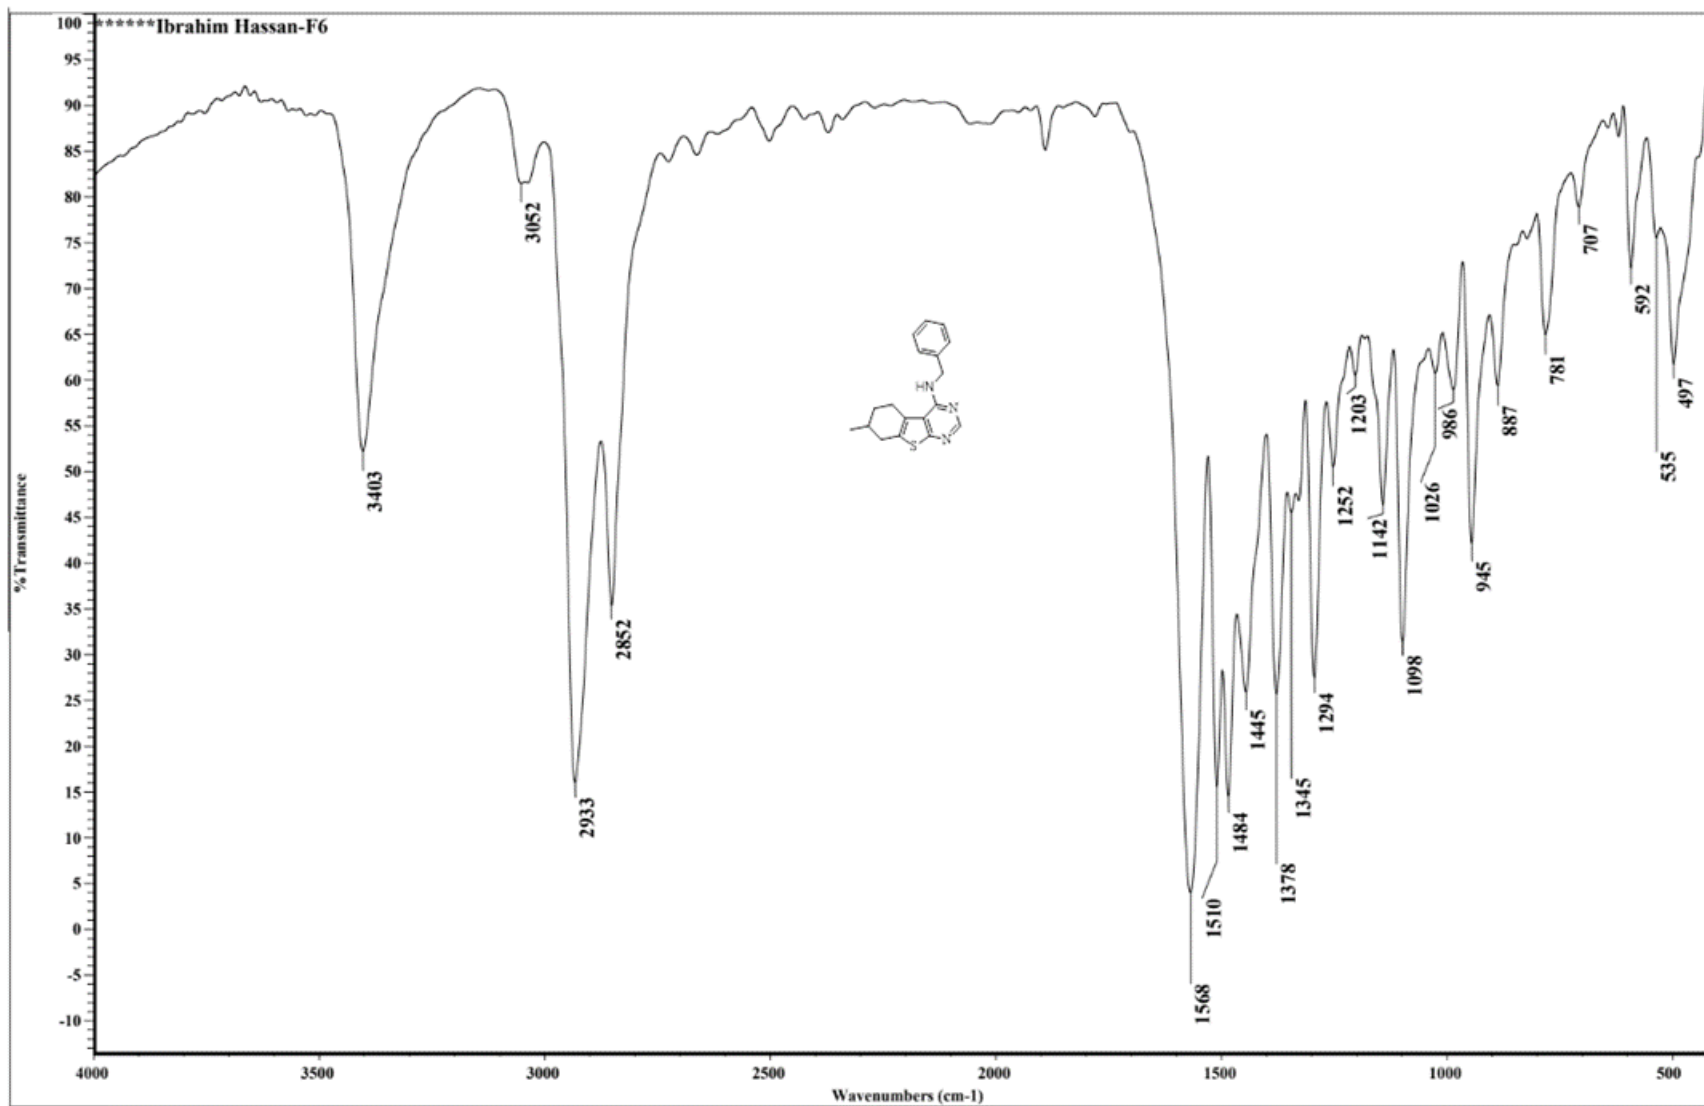

## IR spectra of compound 7a

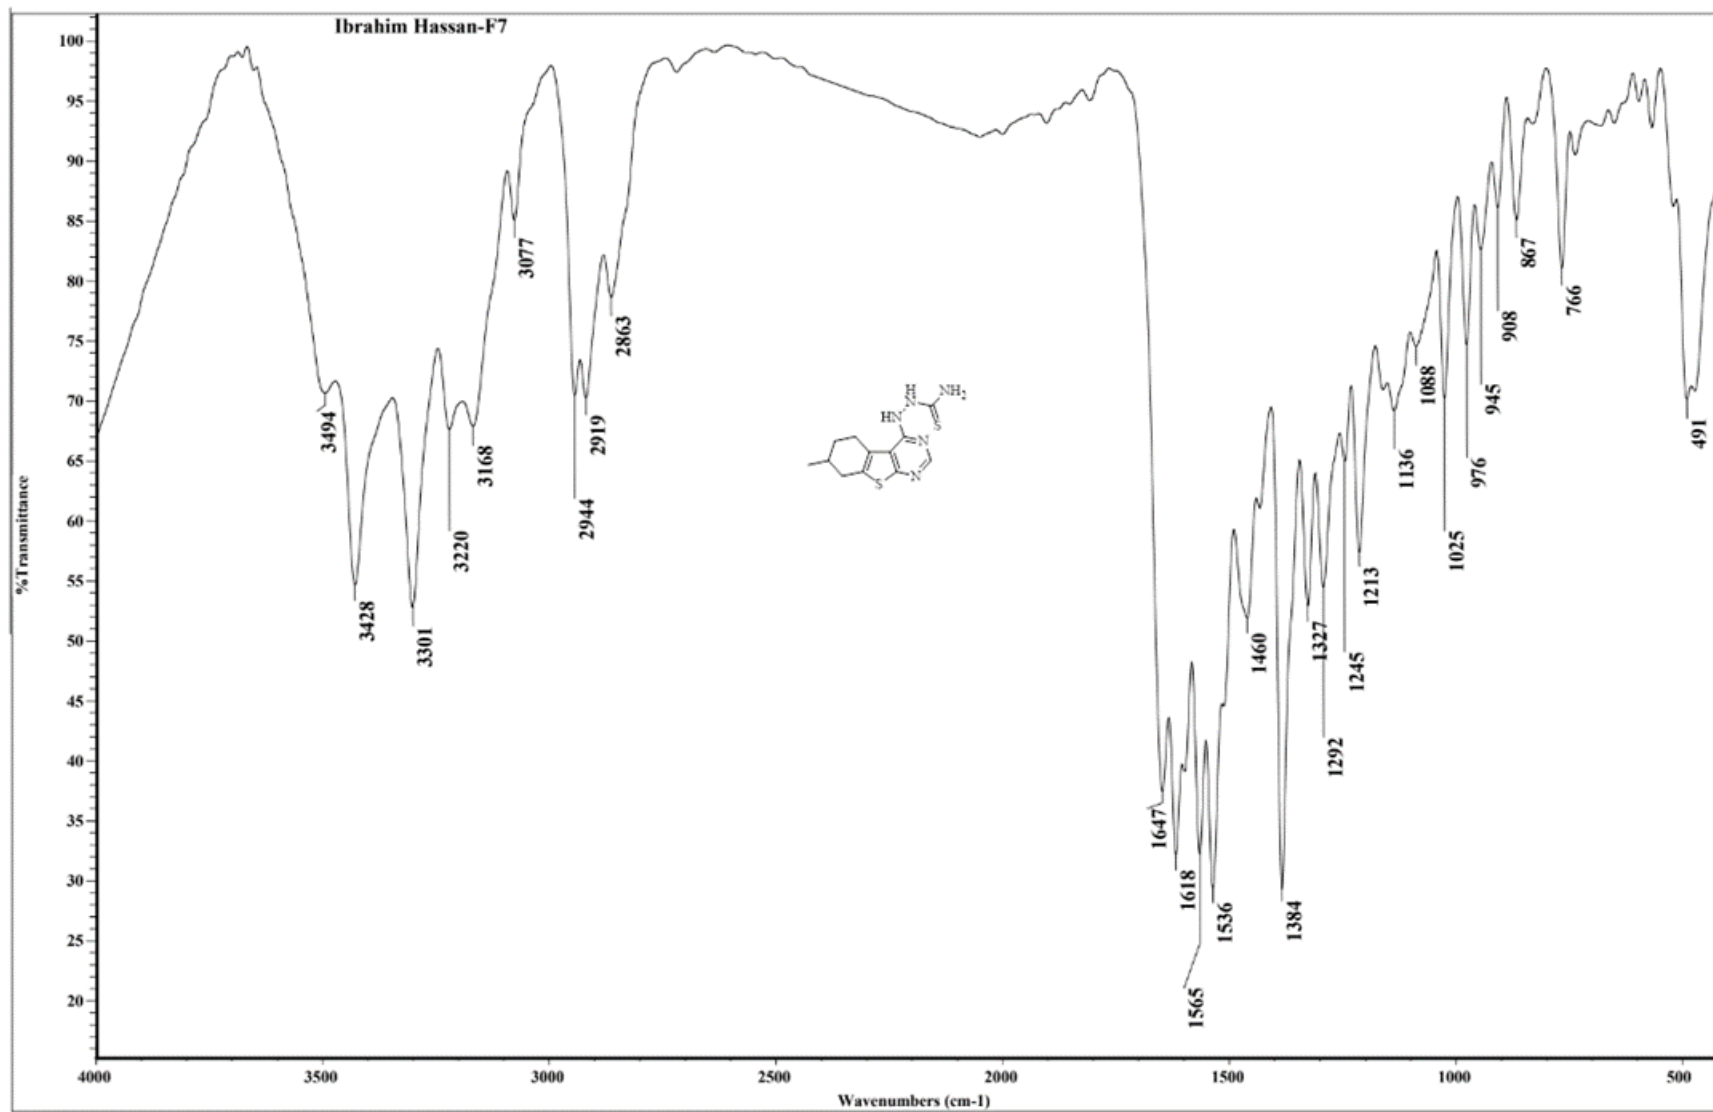

# IR spectra of compound 7b

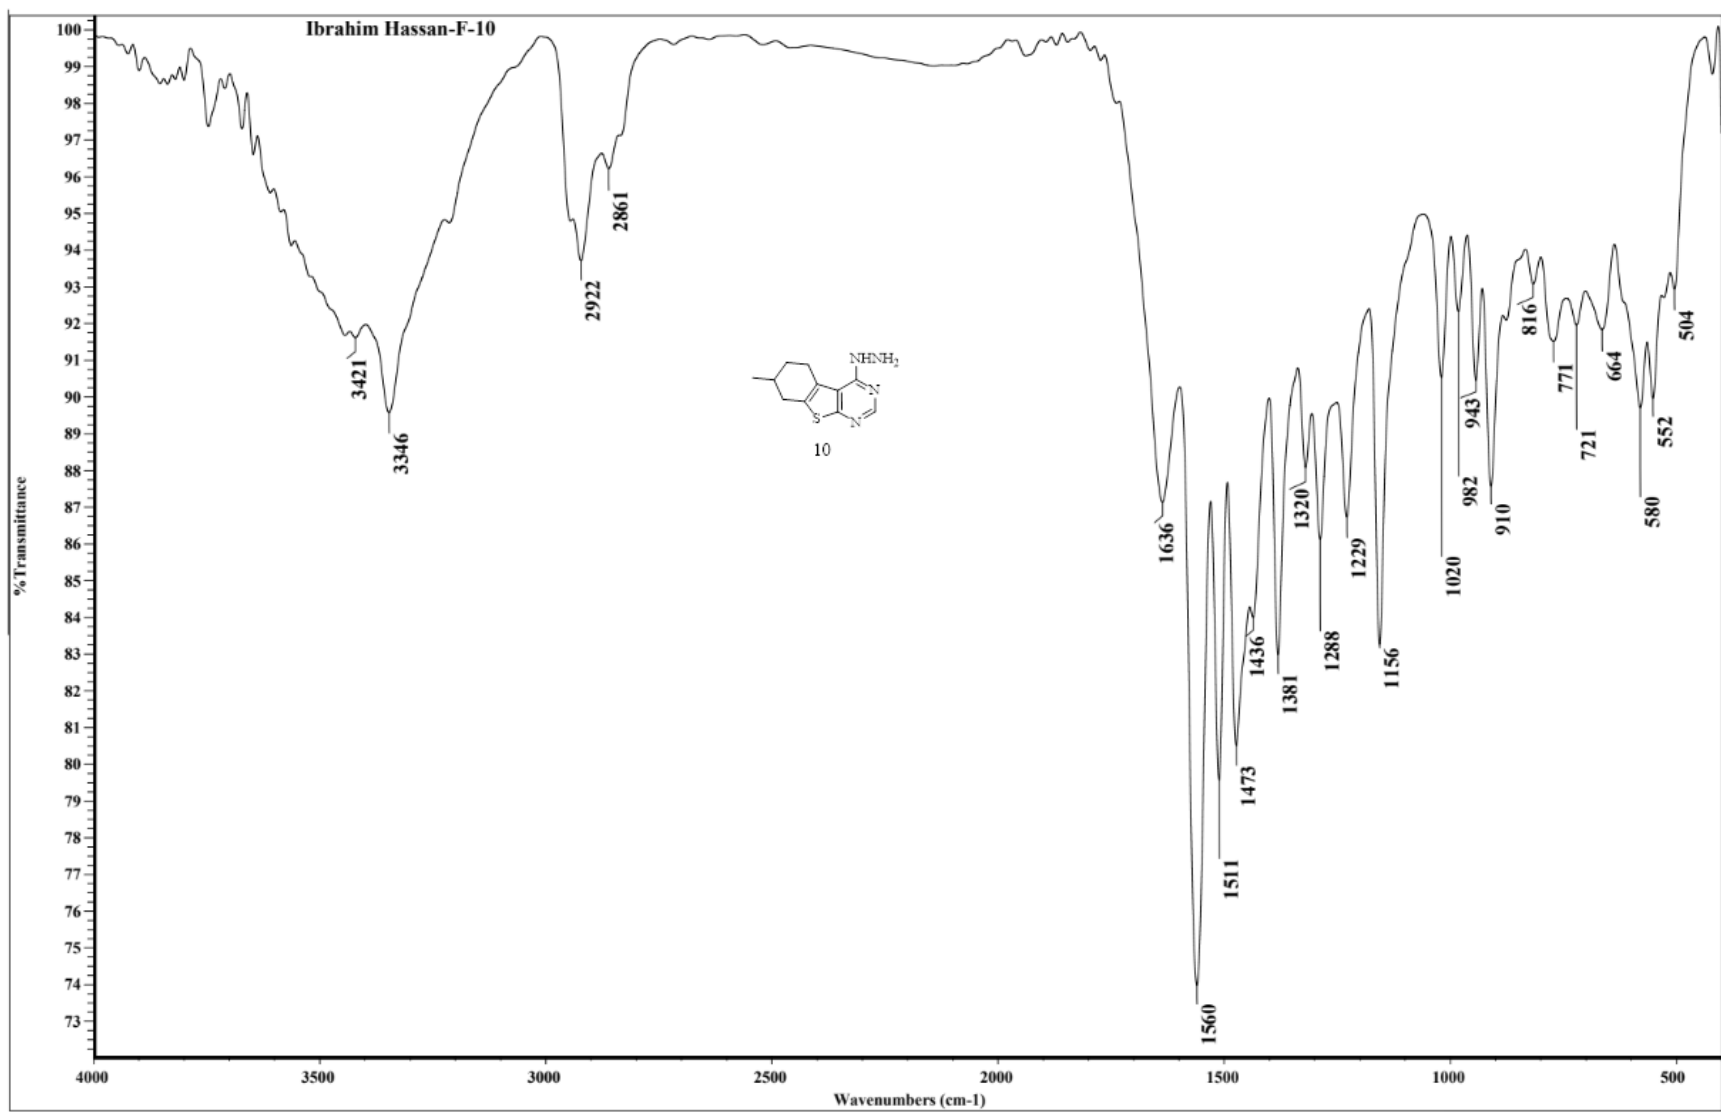



# IR spectra of compound 8

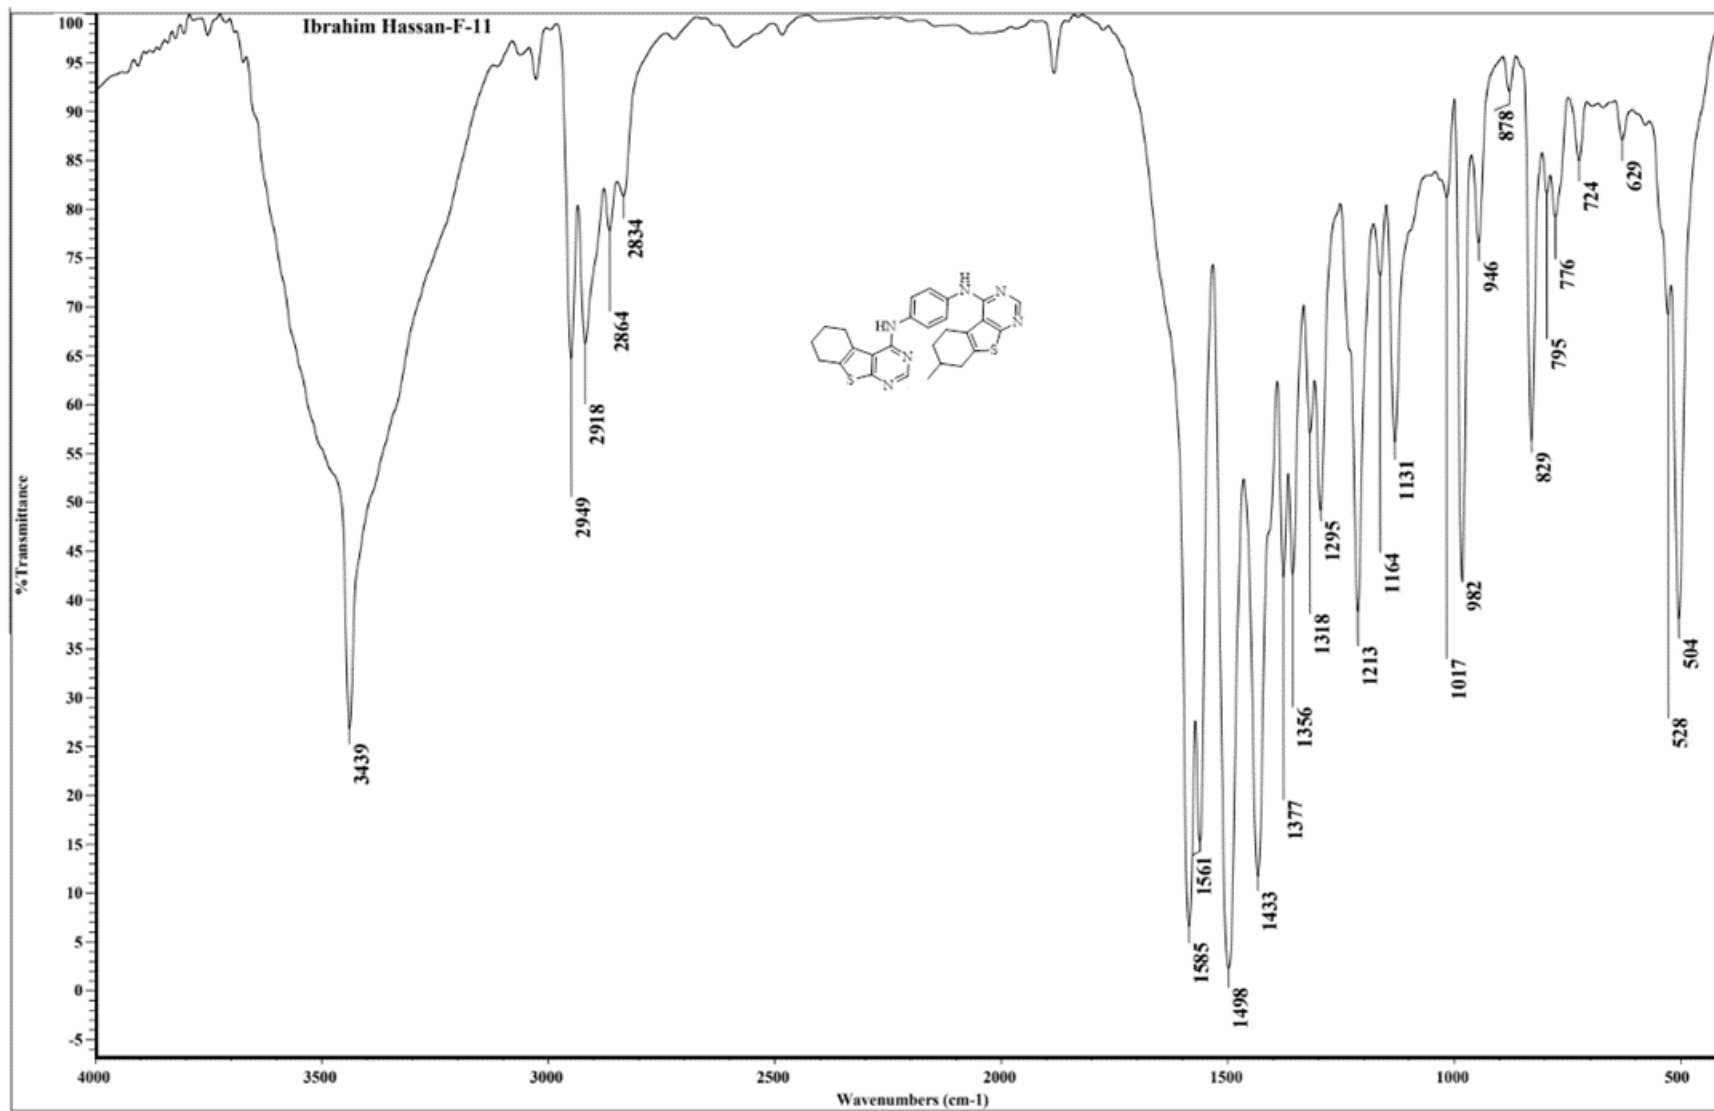

## Mass spectra of compound 5a

Spectrum RT 0.30 - 0.48 (11 scans)  
5a\_Scan1\_is1 2022.07.07 13:31:40 ;  
APCI + Max: 1.9E9

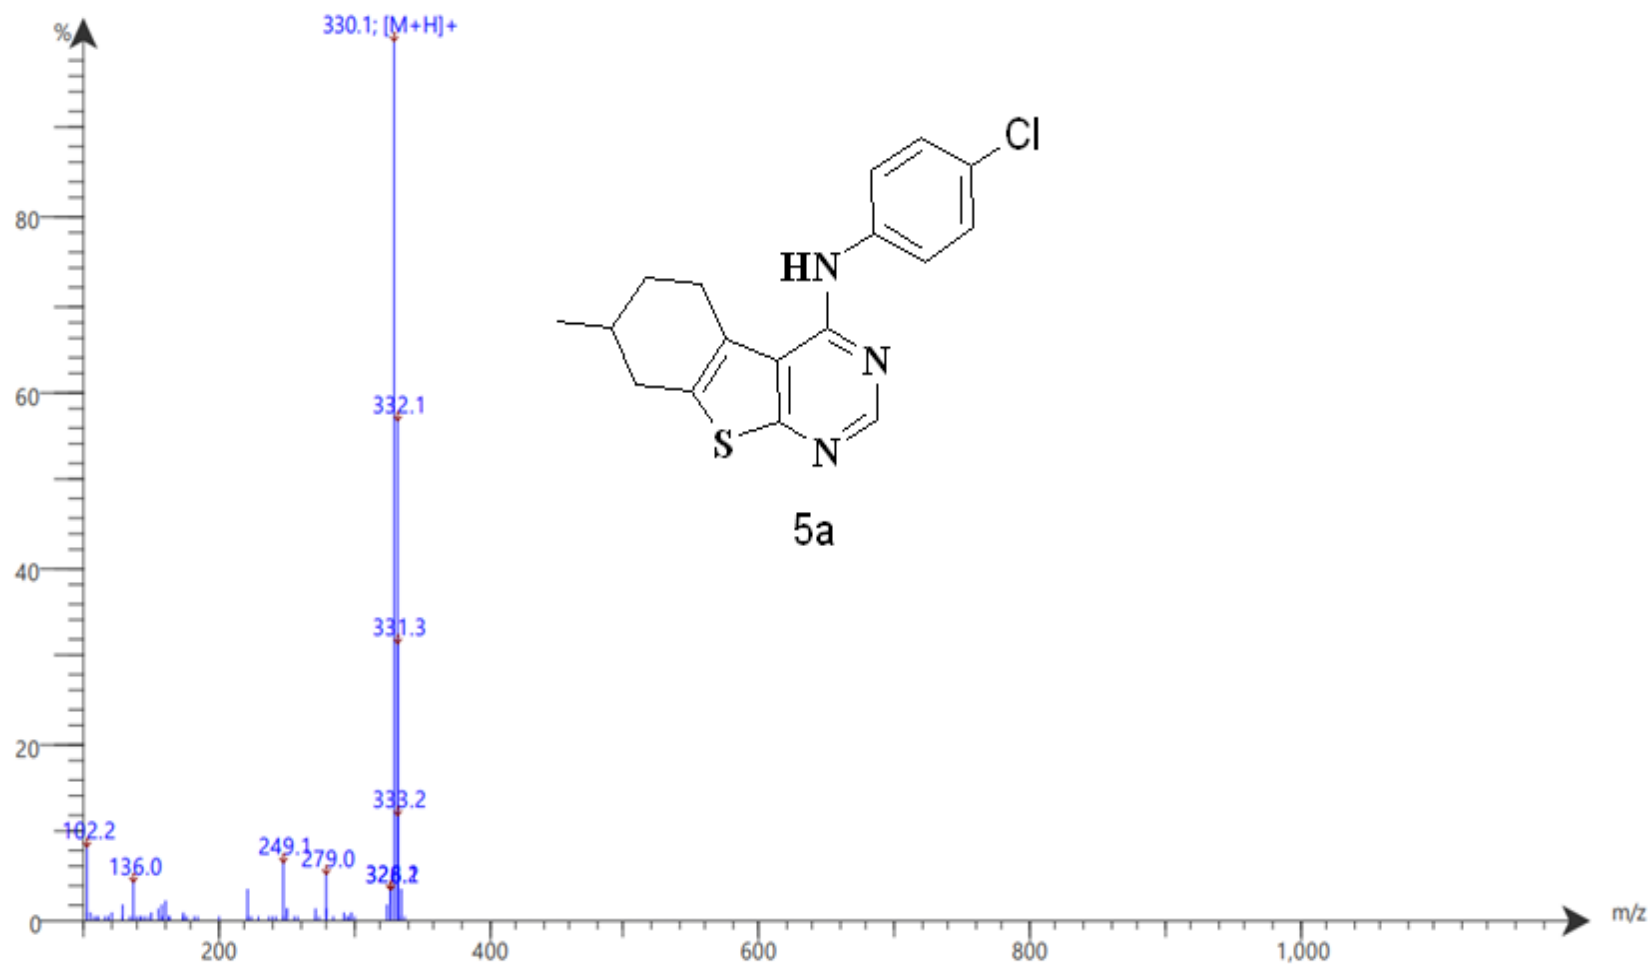

# Mass spectra of compound 5b

Spectrum RT 0.26 - 0.41 (9 scans)  
5b\_Scan1\_is1 2022.07.07 13:34:32 ;  
APCI + Max: 2.2E9

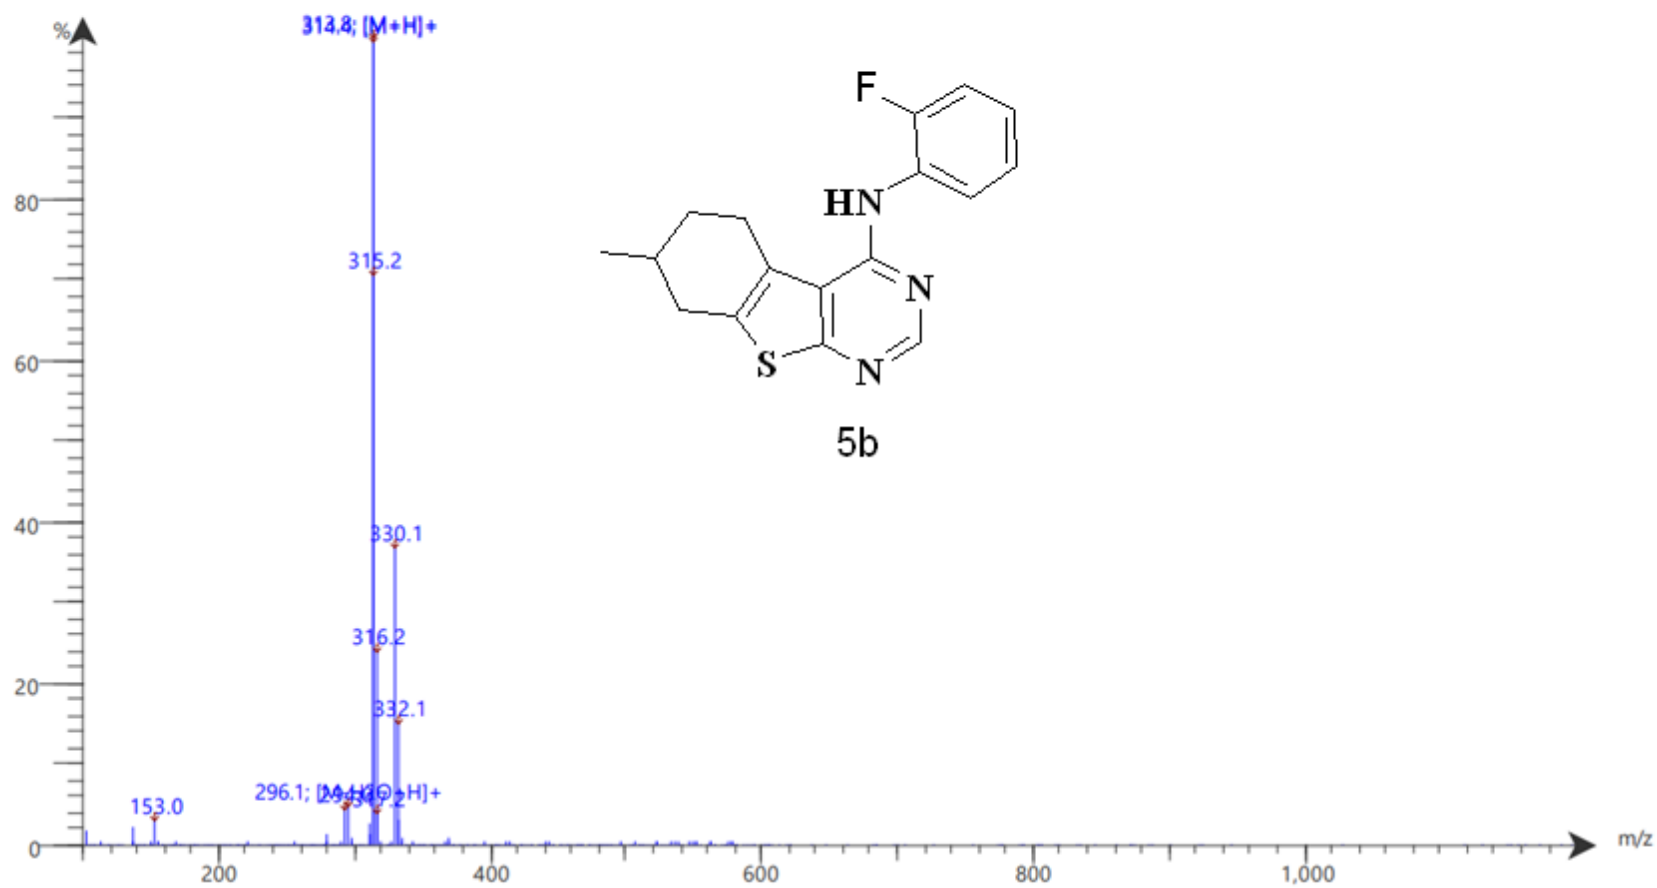

# Mass spectra of compound 5d

Spectrum RT 0.26 - 0.32 (4 scans)  
6\_Scan1\_is1 2022.07.07 13:41:56 ;  
APCI + Max: 1.6E9

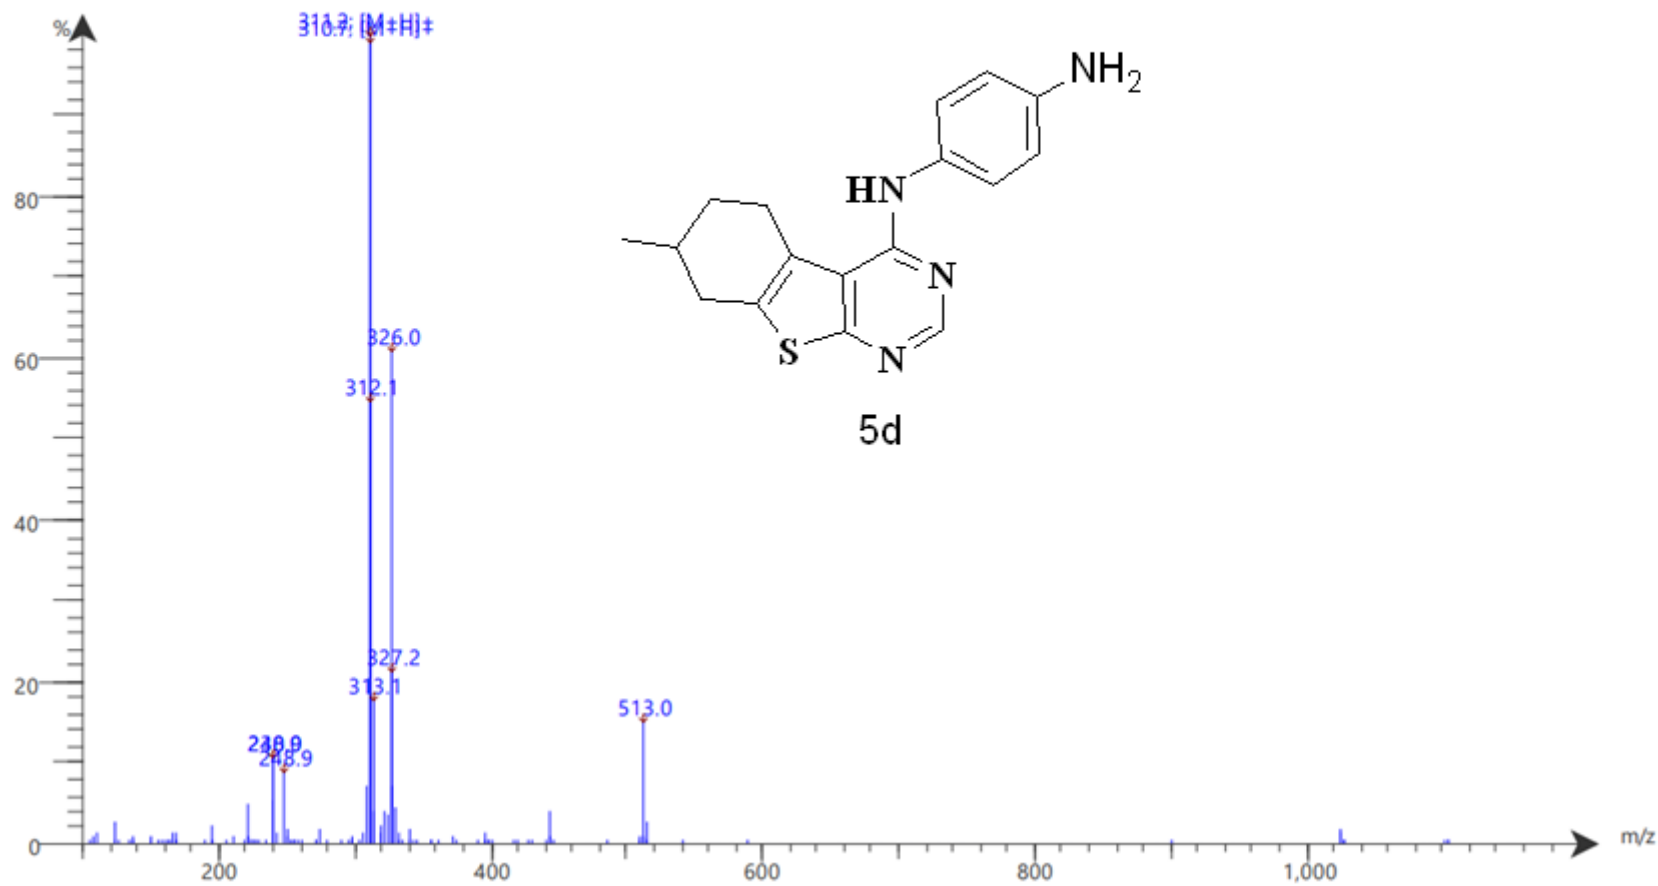

## Mass spectra of compound 6

Spectrum RT 0.24 - 0.27 (3 scans)  
7- Scan2\_is2 2022.07.07 13:48:54 ;  
APCI - Max: 7.5E6

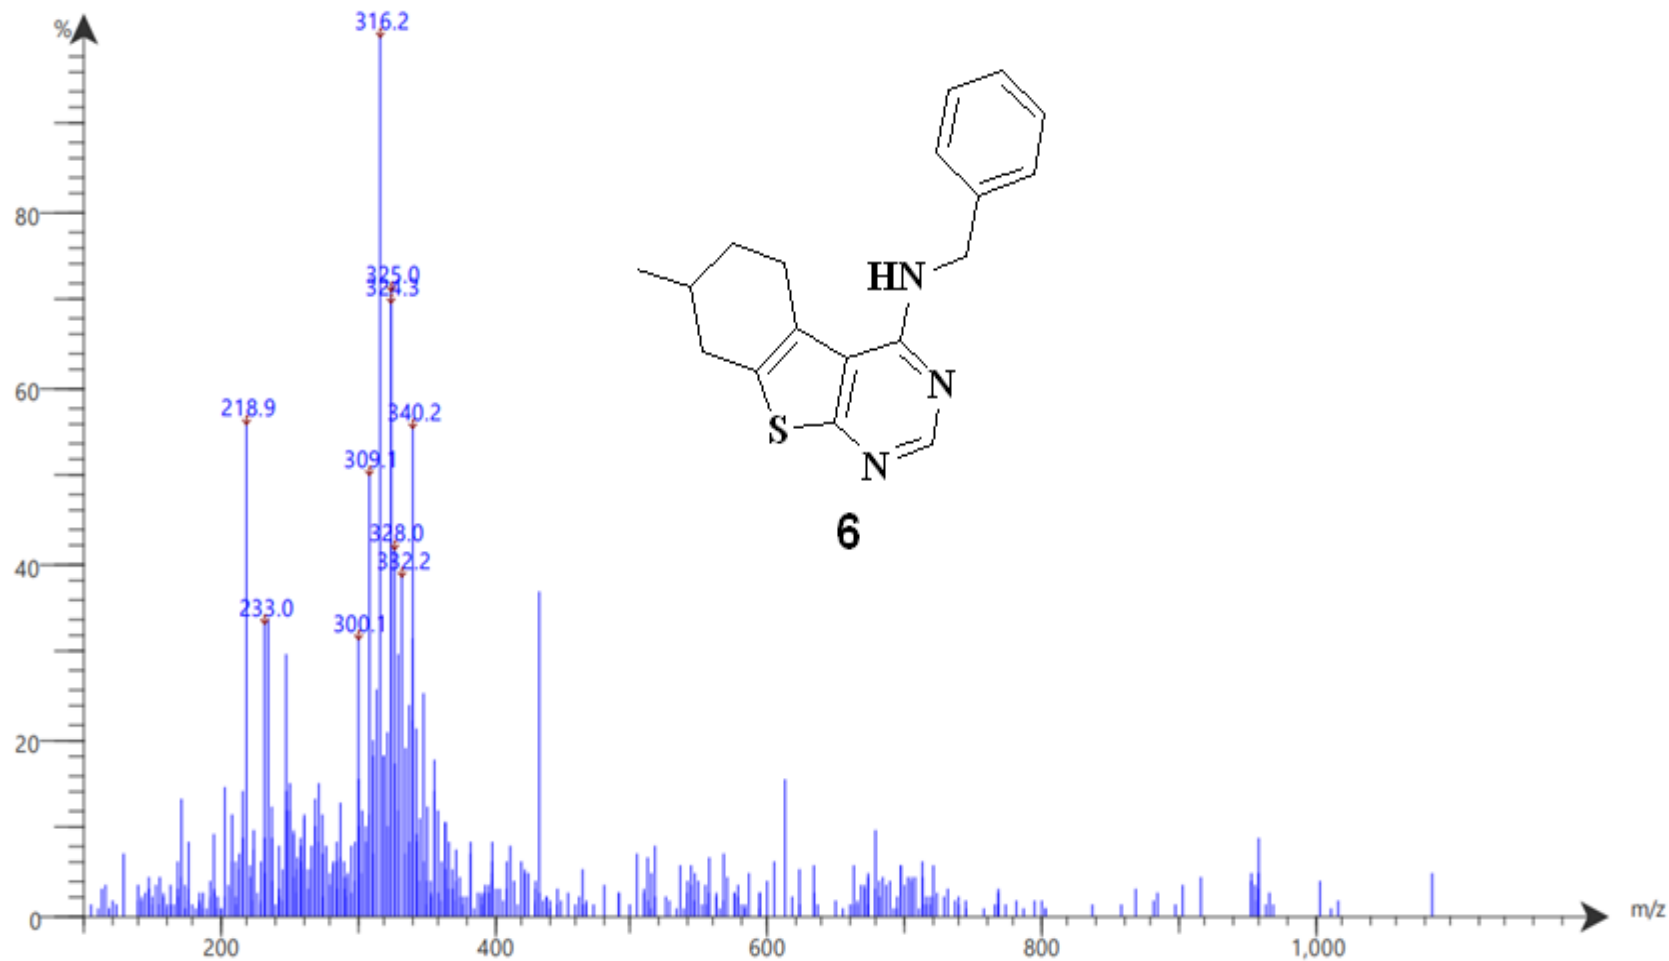

# Mass spectra of compound 8

Spectrum RT 0.54 - 0.61 (5 scans)  
11\_Scan2\_is2 2022.07.07 13:57:10 ;  
APCI - Max: 2.2E7

Intensity

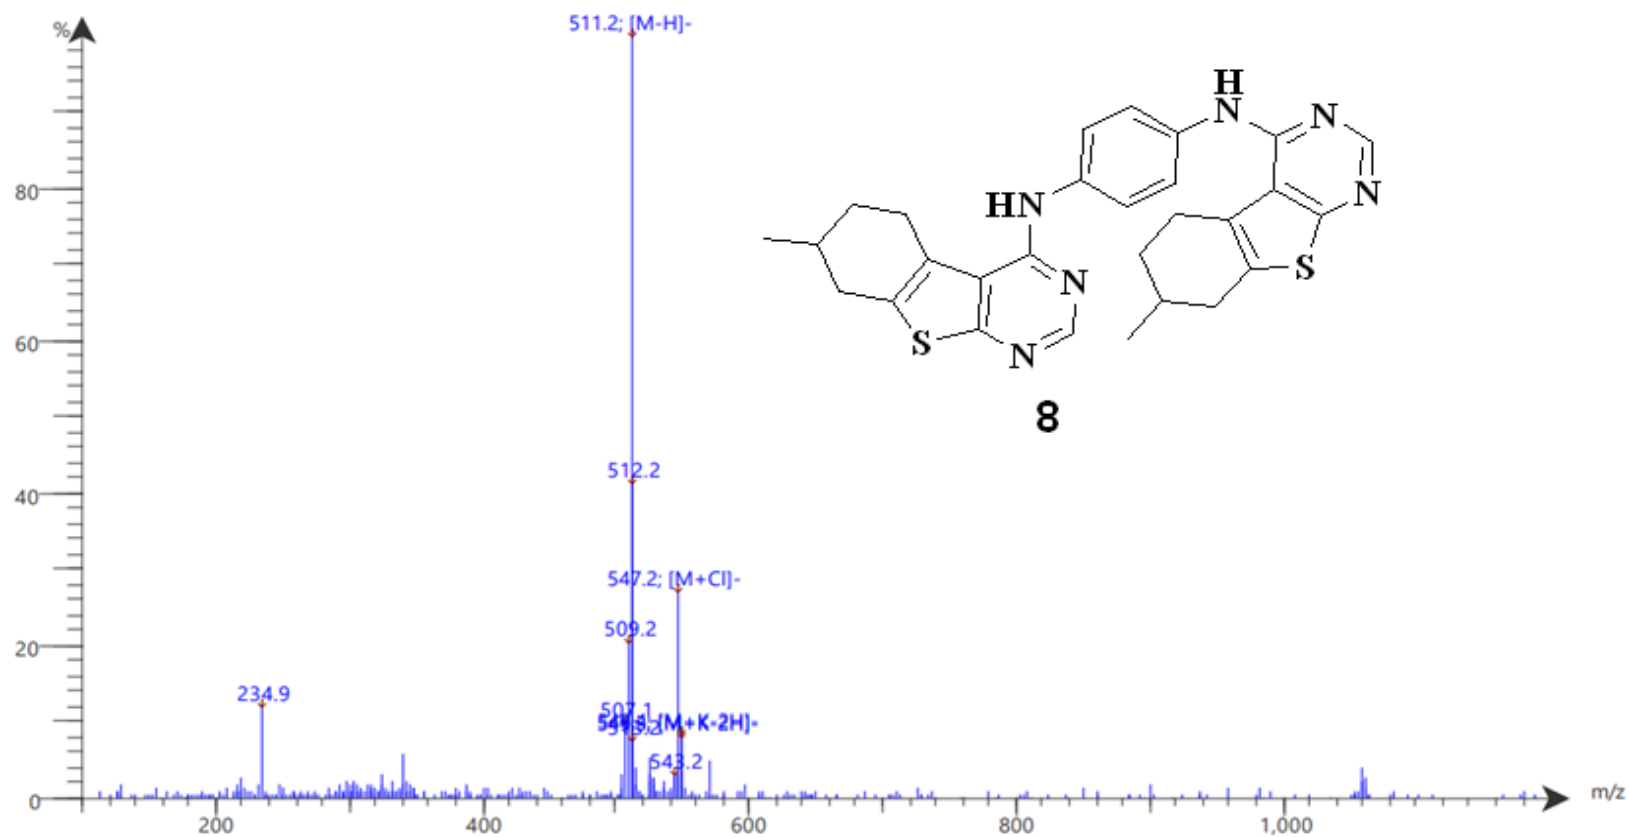

5a

TOPKAT\_Ames\_Mutagenicity

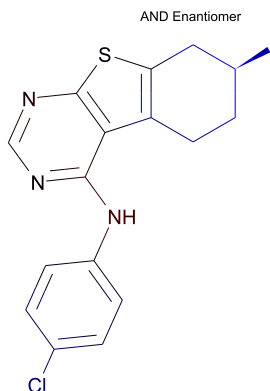C<sub>17</sub>H<sub>16</sub>ClN<sub>3</sub>S

Molecular Weight: 329.84704

ALogP: 5.5

Rotatable Bonds: 2

Acceptors: 3

Donors: 1

**Model Prediction**

Prediction: Non-Mutagen

Probability: 0.612

Enrichment: 1.1

Bayesian Score: -4.69

Mahalanobis Distance: 9.56

Mahalanobis Distance p-value: 0.558

Prediction: Positive if the Bayesian score is above the estimated best cutoff value from minimizing the false positive and false negative rate.

Probability: The estimated probability that the sample is in the positive category. This assumes that the Bayesian score follows a normal distribution and is different from the prediction using a cutoff.

Enrichment: An estimate of enrichment, that is, the increased likelihood (versus random) of this sample being in the category.

Bayesian Score: The standard Laplacian-modified Bayesian score.

Mahalanobis Distance: The Mahalanobis distance (MD) is the distance to the center of the training data. The larger the MD, the less trustworthy the prediction.

Mahalanobis Distance p-value: The p-value gives the fraction of training data with an MD greater than or equal to the one for the given sample, assuming normally distributed data. The smaller the p-value, the less trustworthy the prediction. For highly non-normal X properties (e.g., fingerprints), the MD p-value is wildly inaccurate.

**Structural Similar Compounds**

| Name               | 50264-69-2                                       | 89873-24-5                                       | 4947-27-7                                        |
|--------------------|--------------------------------------------------|--------------------------------------------------|--------------------------------------------------|
| Structure          |                                                  |                                                  |                                                  |
| Actual Endpoint    | Non-Mutagen                                      | Mutagen                                          | Mutagen                                          |
| Predicted Endpoint | Non-Mutagen                                      | Mutagen                                          | Mutagen                                          |
| Distance           | 0.555                                            | 0.557                                            | 0.559                                            |
| Reference          | Kazius et. al., J. Med. Chem. (2005) 48, 312-320 | Kazius et. al., J. Med. Chem. (2005) 48, 312-320 | Kazius et. al., J. Med. Chem. (2005) 48, 312-320 |

**Model Applicability**

Unknown features are fingerprint features in the query molecule, but not found or appearing too infrequently in the training set.

1. All properties and OPS components are within expected ranges.

**Feature Contribution****Top features for positive contribution**

| Fingerprint | Bit/Smiles | Feature Structure                                        | Score | Mutagen in training set |
|-------------|------------|----------------------------------------------------------|-------|-------------------------|
| SCFP_12     | 112346096  | <br>[*][c](:[*]):[c]1:[c]<br>([*]):[*]:[*]:[c]:1:<br>[*] | 0.36  | 1035 out of 1263        |

|                                               |                   |                                                                                                                                                                       |              |                                |
|-----------------------------------------------|-------------------|-----------------------------------------------------------------------------------------------------------------------------------------------------------------------|--------------|--------------------------------|
| SCFP_12                                       | 1310748454        | <p>AND Enantiomer</p> 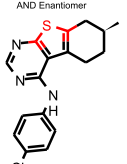 <p><chem>[*][c]1:[*]:[*]:[c](:[*]):s:1</chem></p>           | 0.312        | 126 out of 161                 |
| SCFP_12                                       | 10                | <p>AND Enantiomer</p>  <p><chem>[*]N[*]</chem></p>                                 | 0.306        | 1774 out of 2287               |
| <b>Top Features for negative contribution</b> |                   |                                                                                                                                                                       |              |                                |
| <b>Fingerprint</b>                            | <b>Bit/Smiles</b> | <b>Feature Structure</b>                                                                                                                                              | <b>Score</b> | <b>Mutagen in training set</b> |
| SCFP_12                                       | -55982834         | <p>AND Enantiomer</p>  <p><chem>[*]:[c]1:[*]C[C@@H](C)CC1</chem></p>               | -1.82        | 0 out of 9                     |
| SCFP_12                                       | -1043339860       | <p>AND Enantiomer</p>  <p><chem>[*]CC(C)C[*]</chem></p>                           | -1.09        | 76 out of 399                  |
| SCFP_12                                       | 1905487031        | <p>AND Enantiomer</p>  <p><chem>[*][c]1:[cH]:[cH]:[c](Cl):[cH]:[cH]:1</chem></p> | -0.59        | 23 out of 74                   |



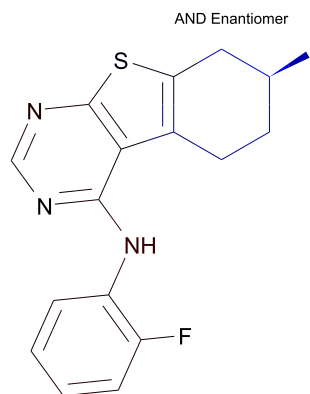

$C_{17}H_{16}FN_3S$

Molecular Weight: 313.39244

ALogP: 5.041

Rotatable Bonds: 2

Acceptors: 3

Donors: 1

## Model Prediction

Prediction: Non-Mutagen

Probability: 0.678

Enrichment: 1.21

Bayesian Score: -2.6

Mahalanobis Distance: 10.9

Mahalanobis Distance p-value: 0.0403

Prediction: Positive if the Bayesian score is above the estimated best cutoff value from minimizing the false positive and false negative rate.

Probability: The estimated probability that the sample is in the positive category. This assumes that the Bayesian score follows a normal distribution and is different from the prediction using a cutoff.

Enrichment: An estimate of enrichment, that is, the increased likelihood (versus random) of this sample being in the category.

Bayesian Score: The standard Laplacian-modified Bayesian score.

Mahalanobis Distance: The Mahalanobis distance (MD) is the distance to the center of the training data. The larger the MD, the less trustworthy the prediction.

Mahalanobis Distance p-value: The p-value gives the fraction of training data with an MD greater than or equal to the one for the given sample, assuming normally distributed data. The smaller the p-value, the less trustworthy the prediction. For highly non-normal X properties (e.g., fingerprints), the MD p-value is wildly inaccurate.

## Structural Similar Compounds

| Name               | 4947-27-7                                        | 50264-69-2                                       | 115664-51-2                                      |
|--------------------|--------------------------------------------------|--------------------------------------------------|--------------------------------------------------|
| Structure          |                                                  |                                                  |                                                  |
| Actual Endpoint    | Mutagen                                          | Non-Mutagen                                      | Mutagen                                          |
| Predicted Endpoint | Mutagen                                          | Non-Mutagen                                      | Mutagen                                          |
| Distance           | 0.539                                            | 0.546                                            | 0.546                                            |
| Reference          | Kazius et. al., J. Med. Chem. (2005) 48, 312-320 | Kazius et. al., J. Med. Chem. (2005) 48, 312-320 | Kazius et. al., J. Med. Chem. (2005) 48, 312-320 |

## Model Applicability

Unknown features are fingerprint features in the query molecule, but not found or appearing too infrequently in the training set.

1. All properties and OPS components are within expected ranges.

## Feature Contribution

### Top features for positive contribution

| Fingerprint | Bit/Smiles | Feature Structure                                                                               | Score | Mutagen in training set |
|-------------|------------|-------------------------------------------------------------------------------------------------|-------|-------------------------|
| SCFP_12     | 112346096  | <br><chem>[*][c](:[*]):[c]1:[c]</chem><br><chem>([*]):[*]:[*]:[c]:1:</chem><br><chem>[*]</chem> | 0.36  | 1035 out of 1263        |

|                                               |                   |                                                                                                                                                                      |              |                                |
|-----------------------------------------------|-------------------|----------------------------------------------------------------------------------------------------------------------------------------------------------------------|--------------|--------------------------------|
| SCFP_12                                       | -1551011249       | <p>AND Enantiomer</p> 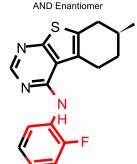 <p>[*]N[c]1:[cH]:[*]:[cH]:[cH]:[cH]:[cH]:[c]:1F</p>        | 0.322        | 13 out of 16                   |
| SCFP_12                                       | 1310748454        | <p>AND Enantiomer</p>  <p>[*][c]1:[*]:[*]:[c](:[*]):s:1</p>                       | 0.312        | 126 out of 161                 |
| <b>Top Features for negative contribution</b> |                   |                                                                                                                                                                      |              |                                |
| <b>Fingerprint</b>                            | <b>Bit/Smiles</b> | <b>Feature Structure</b>                                                                                                                                             | <b>Score</b> | <b>Mutagen in training set</b> |
| SCFP_12                                       | -55982834         | <p>AND Enantiomer</p>  <p>[*]:[c]1:[*]C[C@@H](C)CC1</p>                           | -1.82        | 0 out of 9                     |
| SCFP_12                                       | -1043339860       | <p>AND Enantiomer</p>  <p>[*]CC(C)C[*]</p>                                       | -1.09        | 76 out of 399                  |
| SCFP_12                                       | 1328855840        | <p>AND Enantiomer</p>  <p>[*]:[cH]:[c](N[c](:n:[*]):[c](:[*]):[*]):[cH]:[*]</p> | -0.496       | 1 out of 4                     |

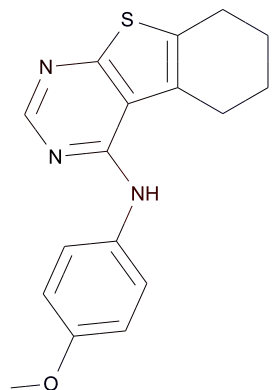

$C_{17}H_{17}N_3OS$

Molecular Weight: 311.40138

ALogP: 4.568

Rotatable Bonds: 3

Acceptors: 4

Donors: 1

## Structural Similar Compounds

| Name               | 1229-55-6                                        | 3-(4'-Chlorobenzylidenamino)-5H-1,2,3-triazin-[5;4b]indol-4-one | 135086-93-0                                      |
|--------------------|--------------------------------------------------|-----------------------------------------------------------------|--------------------------------------------------|
| Structure          |                                                  |                                                                 |                                                  |
| Actual Endpoint    | Mutagen                                          | Mutagen                                                         | Mutagen                                          |
| Predicted Endpoint | Mutagen                                          | Mutagen                                                         | Mutagen                                          |
| Distance           | 0.539                                            | 0.540                                                           | 0.540                                            |
| Reference          | Kazius et. al., J. Med. Chem. (2005) 48, 312-320 | Mutagenesis 7(1):37-39; 1992                                    | Kazius et. al., J. Med. Chem. (2005) 48, 312-320 |

## Model Prediction

**Prediction: Mutagen**

Probability: 0.76

Enrichment: 1.36

Bayesian Score: 1.2

Mahalanobis Distance: 7.63

Mahalanobis Distance p-value: 0.999

Prediction: Positive if the Bayesian score is above the estimated best cutoff value from minimizing the false positive and false negative rate.

Probability: The estimated probability that the sample is in the positive category. This assumes that the Bayesian score follows a normal distribution and is different from the prediction using a cutoff.

Enrichment: An estimate of enrichment, that is, the increased likelihood (versus random) of this sample being in the category.

Bayesian Score: The standard Laplacian-modified Bayesian score.

Mahalanobis Distance: The Mahalanobis distance (MD) is the distance to the center of the training data. The larger the MD, the less trustworthy the prediction.

Mahalanobis Distance p-value: The p-value gives the fraction of training data with an MD greater than or equal to the one for the given sample, assuming normally distributed data. The smaller the p-value, the less trustworthy the prediction. For highly non-normal X properties (e.g., fingerprints), the MD p-value is wildly inaccurate.

## Model Applicability

Unknown features are fingerprint features in the query molecule, but not found or appearing too infrequently in the training set.

- All properties and OPS components are within expected ranges.

## Feature Contribution

### Top features for positive contribution

| Fingerprint | Bit/Smiles | Feature Structure                        | Score | Mutagen in training set |
|-------------|------------|------------------------------------------|-------|-------------------------|
| SCFP_12     | 1825024803 | <br>[*]:[c]1:[*]:[*]:[c]2<br>CCCC[c]:1:2 | 0.472 | 18 out of 19            |

|                                               |                   |                                                                                                                                                       |              |                                |
|-----------------------------------------------|-------------------|-------------------------------------------------------------------------------------------------------------------------------------------------------|--------------|--------------------------------|
| SCFP_12                                       | 112346096         | 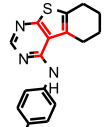<br><chem>[*][c](:[*]):[c]1:[c]([*]):[*]:[*]:[c]:1:[*]</chem>      | 0.36         | 1035 out of 1263               |
| SCFP_12                                       | 1310748454        | <br><chem>[*][c]1:[*]:[*]:[c](:[*]):s:1</chem>                     | 0.312        | 126 out of 161                 |
| <b>Top Features for negative contribution</b> |                   |                                                                                                                                                       |              |                                |
| <b>Fingerprint</b>                            | <b>Bit/Smiles</b> | <b>Feature Structure</b>                                                                                                                              | <b>Score</b> | <b>Mutagen in training set</b> |
| SCFP_12                                       | 1328855840        | <br><chem>[*]:[cH]:[c](N[c](:n:[*]):[c](:[*]):[*]):[cH]:[*]</chem> | -0.496       | 1 out of 4                     |
| SCFP_12                                       | -1272798659       | <br><chem>[*]CCC([*])[*]</chem>                                   | -0.466       | 439 out of 1225                |
| SCFP_12                                       | 815479470         | <br><chem>[*][C@H]1[*]C[c]2:[c](C1):s:[c]([*]):[c]:2:[*]</chem>  | -0.452       | 0 out of 1                     |

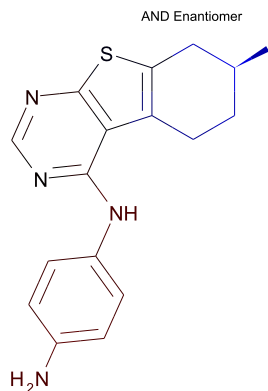

$C_{17}H_{18}N_4S$

Molecular Weight: 310.41662

ALogP: 4.089

Rotatable Bonds: 2

Acceptors: 4

Donors: 2

## Model Prediction

Prediction: Non-Mutagen

Probability: 0.725

Enrichment: 1.3

Bayesian Score: -0.687

Mahalanobis Distance: 9.01

Mahalanobis Distance p-value: 0.823

Prediction: Positive if the Bayesian score is above the estimated best cutoff value from minimizing the false positive and false negative rate.

Probability: The estimated probability that the sample is in the positive category. This assumes that the Bayesian score follows a normal distribution and is different from the prediction using a cutoff.

Enrichment: An estimate of enrichment, that is, the increased likelihood (versus random) of this sample being in the category.

Bayesian Score: The standard Laplacian-modified Bayesian score.

Mahalanobis Distance: The Mahalanobis distance (MD) is the distance to the center of the training data. The larger the MD, the less trustworthy the prediction.

Mahalanobis Distance p-value: The p-value gives the fraction of training data with an MD greater than or equal to the one for the given sample, assuming normally distributed data. The smaller the p-value, the less trustworthy the prediction. For highly non-normal X properties (e.g., fingerprints), the MD p-value is wildly inaccurate.

## Structural Similar Compounds

| Name               | 2425-85-6                                                                                            | 50-65-7                                          | 139953-76-7                                      |
|--------------------|------------------------------------------------------------------------------------------------------|--------------------------------------------------|--------------------------------------------------|
| Structure          |                                                                                                      |                                                  |                                                  |
| Actual Endpoint    | Mutagen                                                                                              | Mutagen                                          | Mutagen                                          |
| Predicted Endpoint | Mutagen                                                                                              | Mutagen                                          | Mutagen                                          |
| Distance           | 0.557                                                                                                | 0.557                                            | 0.562                                            |
| Reference          | Helma, C., Cramer, T., Kramer, S., and De Raedt, L., J. Chem. Inf. Comput. Sci., 2004, pp. 1402-1411 | Kazius et. al., J. Med. Chem. (2005) 48, 312-320 | Kazius et. al., J. Med. Chem. (2005) 48, 312-320 |

## Model Applicability

Unknown features are fingerprint features in the query molecule, but not found or appearing too infrequently in the training set.

- All properties and OPS components are within expected ranges.

## Feature Contribution

### Top features for positive contribution

| Fingerprint | Bit/Smiles  | Feature Structure                                      | Score | Mutagen in training set |
|-------------|-------------|--------------------------------------------------------|-------|-------------------------|
| SCFP_12     | -1728149235 | <br><chem>[*]N[c]1:[cH]:[cH]:[c](N):[cH]:[cH]:1</chem> | 0.442 | 21 out of 23            |



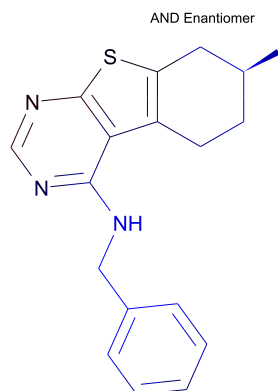

$C_{18}H_{19}N_3S$

Molecular Weight: 309.42856

ALogP: 4.678

Rotatable Bonds: 3

Acceptors: 3

Donors: 1

## Model Prediction

Prediction: Non-Mutagen

Probability: 0.473

Enrichment: 0.848

Bayesian Score: -8.11

Mahalanobis Distance: 8.95

Mahalanobis Distance p-value: 0.843

Prediction: Positive if the Bayesian score is above the estimated best cutoff value from minimizing the false positive and false negative rate.

Probability: The estimated probability that the sample is in the positive category. This assumes that the Bayesian score follows a normal distribution and is different from the prediction using a cutoff.

Enrichment: An estimate of enrichment, that is, the increased likelihood (versus random) of this sample being in the category.

Bayesian Score: The standard Laplacian-modified Bayesian score.

Mahalanobis Distance: The Mahalanobis distance (MD) is the distance to the center of the training data. The larger the MD, the less trustworthy the prediction.

Mahalanobis Distance p-value: The p-value gives the fraction of training data with an MD greater than or equal to the one for the given sample, assuming normally distributed data. The smaller the p-value, the less trustworthy the prediction. For highly non-normal X properties (e.g., fingerprints), the MD p-value is wildly inaccurate.

## Structural Similar Compounds

| Name               | 50264-69-2                                       | 3771-19-5                                        | 4947-27-7                                        |
|--------------------|--------------------------------------------------|--------------------------------------------------|--------------------------------------------------|
| Structure          |                                                  |                                                  |                                                  |
| Actual Endpoint    | Non-Mutagen                                      | Non-Mutagen                                      | Mutagen                                          |
| Predicted Endpoint | Non-Mutagen                                      | Non-Mutagen                                      | Mutagen                                          |
| Distance           | 0.501                                            | 0.554                                            | 0.557                                            |
| Reference          | Kazius et. al., J. Med. Chem. (2005) 48, 312-320 | Kazius et. al., J. Med. Chem. (2005) 48, 312-320 | Kazius et. al., J. Med. Chem. (2005) 48, 312-320 |

## Model Applicability

Unknown features are fingerprint features in the query molecule, but not found or appearing too infrequently in the training set.

1. All properties and OPS components are within expected ranges.

## Feature Contribution

### Top features for positive contribution

| Fingerprint | Bit/Smiles  | Feature Structure                                                  | Score | Mutagen in training set |
|-------------|-------------|--------------------------------------------------------------------|-------|-------------------------|
| SCFP_12     | -1231050790 | <br><chem>[*]CN[c]1n:[cH]:[*]:[c]2:[*]:[*]:[c]([*]):[c]:1:2</chem> | 0.388 | 3 out of 3              |

|                                               |                   |                                                                                                                                                                                                        |              |                                |
|-----------------------------------------------|-------------------|--------------------------------------------------------------------------------------------------------------------------------------------------------------------------------------------------------|--------------|--------------------------------|
| SCFP_12                                       | 112346096         | <p>AND Enantiomer</p> 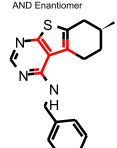 <p><chem>[*][c](-[*]):[c]1:[c]([*]):[*]:[*]:[c]:1:[c]([*]):[*]:[*]:[c]:1:[c]([*])</chem></p> | 0.36         | 1035 out of 1263               |
| SCFP_12                                       | 1310748454        | <p>AND Enantiomer</p>  <p><chem>[*][c]1:[*]:[*]:[c]([*]):[*]:s:1</chem></p>                                         | 0.312        | 126 out of 161                 |
| <b>Top Features for negative contribution</b> |                   |                                                                                                                                                                                                        |              |                                |
| <b>Fingerprint</b>                            | <b>Bit/Smiles</b> | <b>Feature Structure</b>                                                                                                                                                                               | <b>Score</b> | <b>Mutagen in training set</b> |
| SCFP_12                                       | -55982834         | <p>AND Enantiomer</p>  <p><chem>[*]:[c]1:[*]C[C@H](C)CC1</chem></p>                                                 | -1.82        | 0 out of 9                     |
| SCFP_12                                       | -1043339860       | <p>AND Enantiomer</p>  <p><chem>[*]CC(C)C[*]</chem></p>                                                            | -1.09        | 76 out of 399                  |
| SCFP_12                                       | 227993601         | <p>AND Enantiomer</p>  <p><chem>[*]:n:[c](NC[c]1:[c]H):[c]H]:[c]H:[*]:[c]H):[c]H):1):[c](-[*]):[*]</chem></p>     | -0.998       | 0 out of 3                     |



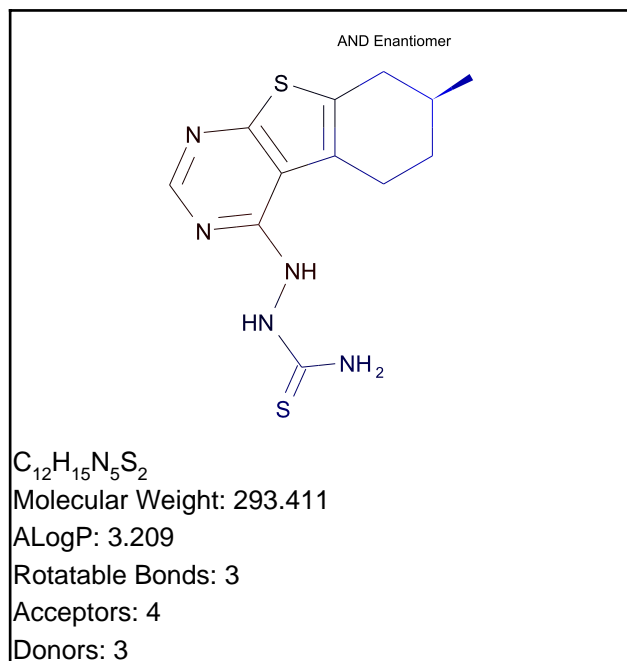

### Model Prediction

Prediction: Non-Mutagen

Probability: 0.608

Enrichment: 1.09

Bayesian Score: -4.8

Mahalanobis Distance: 13.4

Mahalanobis Distance p-value: 2.93e-007

Prediction: Positive if the Bayesian score is above the estimated best cutoff value from minimizing the false positive and false negative rate.

Probability: The estimated probability that the sample is in the positive category. This assumes that the Bayesian score follows a normal distribution and is different from the prediction using a cutoff.

Enrichment: An estimate of enrichment, that is, the increased likelihood (versus random) of this sample being in the category.

Bayesian Score: The standard Laplacian-modified Bayesian score.

Mahalanobis Distance: The Mahalanobis distance (MD) is the distance to the center of the training data. The larger the MD, the less trustworthy the prediction.

Mahalanobis Distance p-value: The p-value gives the fraction of training data with an MD greater than or equal to the one for the given sample, assuming normally distributed data. The smaller the p-value, the less trustworthy the prediction. For highly non-normal X properties (e.g., fingerprints), the MD p-value is wildly inaccurate.

### Structural Similar Compounds

| Name               | 64808-48-6                                                                          | 2:3-DIHYDRO-2-(5-NITRO-2-THIENYL)-4-QUINAZOLINE                                     | 33389-33-2                                                                          |
|--------------------|-------------------------------------------------------------------------------------|-------------------------------------------------------------------------------------|-------------------------------------------------------------------------------------|
| Structure          | 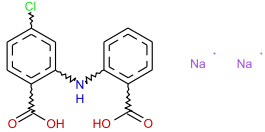 |  |  |
| Actual Endpoint    | Non-Mutagen                                                                         | Mutagen                                                                             | Mutagen                                                                             |
| Predicted Endpoint | Non-Mutagen                                                                         | Mutagen                                                                             | Mutagen                                                                             |
| Distance           | 0.611                                                                               | 0.615                                                                               | 0.616                                                                               |
| Reference          | Kazius et. al., J. Med. Chem. (2005) 48, 312-320                                    | EMIC                                                                                | Kazius et. al., J. Med. Chem. (2005) 48, 312-320                                    |

### Model Applicability

Unknown features are fingerprint features in the query molecule, but not found or appearing too infrequently in the training set.

- All properties and OPS components are within expected ranges.

### Feature Contribution

#### Top features for positive contribution

| Fingerprint | Bit/Smiles  | Feature Structure                                                                                                     | Score | Mutagen in training set |
|-------------|-------------|-----------------------------------------------------------------------------------------------------------------------|-------|-------------------------|
| SCFP_12     | -1848869096 | 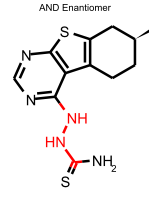<br><chem>[*]NNC(=[*])[*]</chem> | 0.38  | 18 out of 21            |

|                                               |                   |                                                                                                                                                                         |              |                                |
|-----------------------------------------------|-------------------|-------------------------------------------------------------------------------------------------------------------------------------------------------------------------|--------------|--------------------------------|
| SCFP_12                                       | 112346096         | <p>AND Enantiomer</p>  <p>[*][c](:[*]):[c]1:[c]<br/>([*]):[*]:[*]:[c]:1:<br/>[*]</p> | 0.36         | 1035 out of 1263               |
| SCFP_12                                       | 1310748454        | <p>AND Enantiomer</p>  <p>[*][c]1:[*]:[*]:[c](:<br/>[*]):s:1</p>                     | 0.312        | 126 out of 161                 |
| <b>Top Features for negative contribution</b> |                   |                                                                                                                                                                         |              |                                |
| <b>Fingerprint</b>                            | <b>Bit/Smiles</b> | <b>Feature Structure</b>                                                                                                                                                | <b>Score</b> | <b>Mutagen in training set</b> |
| SCFP_12                                       | -55982834         | <p>AND Enantiomer</p>  <p>[*]:[c]1:[*]C[C@H](C)<br/>)CC1</p>                         | -1.82        | 0 out of 9                     |
| SCFP_12                                       | -1043339860       | <p>AND Enantiomer</p>  <p>[*]CC(C)C[*]</p>                                          | -1.09        | 76 out of 399                  |
| SCFP_12                                       | 382734644         | <p>AND Enantiomer</p>  <p>[*]NC(=S)N</p>                                           | -0.811       | 3 out of 14                    |

9a

TOPKAT\_Ames\_Mutagenicity

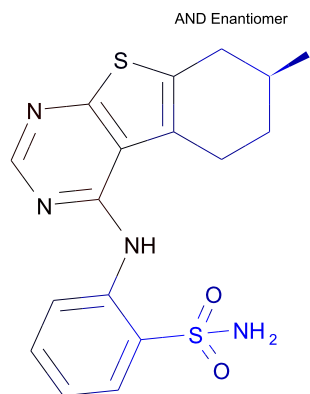
 $C_{17}H_{18}N_4O_2S_2$ 

Molecular Weight: 374.48042

ALogP: 3.541

Rotatable Bonds: 3

Acceptors: 5

Donors: 2

## Model Prediction

Prediction: Non-Mutagen

Probability: 0.423

Enrichment: 0.757

Bayesian Score: -9.21

Mahalanobis Distance: 11.8

Mahalanobis Distance p-value: 0.00178

Prediction: Positive if the Bayesian score is above the estimated best cutoff value from minimizing the false positive and false negative rate.

Probability: The estimated probability that the sample is in the positive category. This assumes that the Bayesian score follows a normal distribution and is different from the prediction using a cutoff.

Enrichment: An estimate of enrichment, that is, the increased likelihood (versus random) of this sample being in the category.

Bayesian Score: The standard Laplacian-modified Bayesian score.

Mahalanobis Distance: The Mahalanobis distance (MD) is the distance to the center of the training data. The larger the MD, the less trustworthy the prediction.

Mahalanobis Distance p-value: The p-value gives the fraction of training data with an MD greater than or equal to the one for the given sample, assuming normally distributed data. The smaller the p-value, the less trustworthy the prediction. For highly non-normal X properties (e.g., fingerprints), the MD p-value is wildly inaccurate.

## Structural Similar Compounds

| Name               | 98644-23-6                                       | 130-17-6                                         | 139953-77-8                                      |
|--------------------|--------------------------------------------------|--------------------------------------------------|--------------------------------------------------|
| Structure          |                                                  |                                                  |                                                  |
| Actual Endpoint    | Mutagen                                          | Mutagen                                          | Mutagen                                          |
| Predicted Endpoint | Mutagen                                          | Mutagen                                          | Mutagen                                          |
| Distance           | 0.534                                            | 0.565                                            | 0.567                                            |
| Reference          | Kazius et. al., J. Med. Chem. (2005) 48, 312-320 | Kazius et. al., J. Med. Chem. (2005) 48, 312-320 | Kazius et. al., J. Med. Chem. (2005) 48, 312-320 |

## Model Applicability

Unknown features are fingerprint features in the query molecule, but not found or appearing too infrequently in the training set.

- All properties and OPS components are within expected ranges.

## Feature Contribution

### Top features for positive contribution

| Fingerprint | Bit/Smiles | Feature Structure                                                                                                           | Score | Mutagen in training set |
|-------------|------------|-----------------------------------------------------------------------------------------------------------------------------|-------|-------------------------|
| SCFP_12     | 112346096  | <p>AND Enantiomer</p> <p><chem>[*][c](:[*]):[c]1:[c]</chem><br/> <chem>([*]):[*]:[*]:[c]:1</chem><br/> <chem>[*]</chem></p> | 0.36  | 1035 out of 1263        |

|                                               |                   |                                                                                                                                                                                        |              |                                |
|-----------------------------------------------|-------------------|----------------------------------------------------------------------------------------------------------------------------------------------------------------------------------------|--------------|--------------------------------|
| SCFP_12                                       | 896331226         | <p>AND Enantiomer</p> 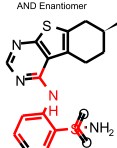 <p>[*]S(=[*])(=[*])[c]1:<br/>[cH]:[*]:[cH]:[cH]:[<br/>c]:1N[c](:[*]):[*]</p> | 0.337        | 6 out of 7                     |
| SCFP_12                                       | 1310748454        | <p>AND Enantiomer</p>  <p>[*][c]1:[*]:[*]:[c](:<br/>[*]):s:1</p>                                    | 0.312        | 126 out of 161                 |
| <b>Top Features for negative contribution</b> |                   |                                                                                                                                                                                        |              |                                |
| <b>Fingerprint</b>                            | <b>Bit/Smiles</b> | <b>Feature Structure</b>                                                                                                                                                               | <b>Score</b> | <b>Mutagen in training set</b> |
| SCFP_12                                       | -55982834         | <p>AND Enantiomer</p>  <p>[*]:[c]1:[*]C[C@H](C<br/>)CC1</p>                                         | -1.82        | 0 out of 9                     |
| SCFP_12                                       | -1358544872       | <p>AND Enantiomer</p>  <p>[*]S(=[*])(=[*])N</p>                                                    | -1.57        | 1 out of 15                    |
| SCFP_12                                       | -1463646519       | <p>AND Enantiomer</p>  <p>[*][c](:[*]):[c](:[cH<br/>]:[*])S(=O)(=O)N</p>                          | -1.29        | 1 out of 11                    |

9b

TOPKAT\_Ames\_Mutagenicity

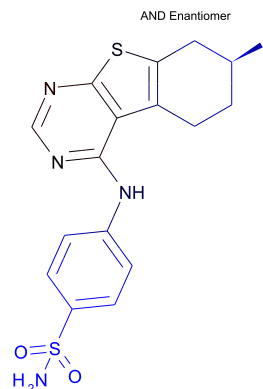
 $C_{17}H_{18}N_4O_2S_2$ 

Molecular Weight: 374.48042

ALogP: 3.541

Rotatable Bonds: 3

Acceptors: 5

Donors: 2

## Model Prediction

Prediction: Non-Mutagen

Probability: 0.308

Enrichment: 0.552

Bayesian Score: -11.6

Mahalanobis Distance: 11.8

Mahalanobis Distance p-value: 0.00178

Prediction: Positive if the Bayesian score is above the estimated best cutoff value from minimizing the false positive and false negative rate.

Probability: The estimated probability that the sample is in the positive category. This assumes that the Bayesian score follows a normal distribution and is different from the prediction using a cutoff.

Enrichment: An estimate of enrichment, that is, the increased likelihood (versus random) of this sample being in the category.

Bayesian Score: The standard Laplacian-modified Bayesian score.

Mahalanobis Distance: The Mahalanobis distance (MD) is the distance to the center of the training data. The larger the MD, the less trustworthy the prediction.

Mahalanobis Distance p-value: The p-value gives the fraction of training data with an MD greater than or equal to the one for the given sample, assuming normally distributed data. The smaller the p-value, the less trustworthy the prediction. For highly non-normal X properties (e.g., fingerprints), the MD p-value is wildly inaccurate.

## Structural Similar Compounds

| Name               | 98644-23-6                                       | 130-17-6                                         | 139953-77-8                                      |
|--------------------|--------------------------------------------------|--------------------------------------------------|--------------------------------------------------|
| Structure          |                                                  |                                                  |                                                  |
| Actual Endpoint    | Mutagen                                          | Mutagen                                          | Mutagen                                          |
| Predicted Endpoint | Mutagen                                          | Mutagen                                          | Mutagen                                          |
| Distance           | 0.539                                            | 0.567                                            | 0.571                                            |
| Reference          | Kazius et. al., J. Med. Chem. (2005) 48, 312-320 | Kazius et. al., J. Med. Chem. (2005) 48, 312-320 | Kazius et. al., J. Med. Chem. (2005) 48, 312-320 |

## Model Applicability

Unknown features are fingerprint features in the query molecule, but not found or appearing too infrequently in the training set.

- All properties and OPS components are within expected ranges.

## Feature Contribution

### Top features for positive contribution

| Fingerprint | Bit/Smiles | Feature Structure                                           | Score | Mutagen in training set |
|-------------|------------|-------------------------------------------------------------|-------|-------------------------|
| SCFP_12     | 112346096  | <br><chem>[*][c]([*])[c]1:[c]([*]):[*]:[*]:[c]:1:[*]</chem> | 0.36  | 1035 out of 1263        |

|                                               |                   |                                                                                                                                                                               |              |                                |
|-----------------------------------------------|-------------------|-------------------------------------------------------------------------------------------------------------------------------------------------------------------------------|--------------|--------------------------------|
| SCFP_12                                       | 1310748454        | <p>AND Enantiomer</p> 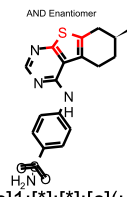 <p><chem>[*][c]1:[*]:[*]:[c](:[*]):s:1</chem></p>                    | 0.312        | 126 out of 161                 |
| SCFP_12                                       | 10                | <p>AND Enantiomer</p>  <p><chem>[*]N[*]</chem></p>                                         | 0.306        | 1774 out of 2287               |
| <b>Top Features for negative contribution</b> |                   |                                                                                                                                                                               |              |                                |
| <b>Fingerprint</b>                            | <b>Bit/Smiles</b> | <b>Feature Structure</b>                                                                                                                                                      | <b>Score</b> | <b>Mutagen in training set</b> |
| SCFP_12                                       | 1892918731        | <p>AND Enantiomer</p>  <p><chem>[*]N[c]1:[cH]:[cH]:[c]l(:[cH]:[cH]:1)S(=O)(=O)N</chem></p> | -2.2         | 0 out of 14                    |
| SCFP_12                                       | -55982834         | <p>AND Enantiomer</p>  <p><chem>[*]:[c]1:[*]C[C@@H](C)CC1</chem></p>                      | -1.82        | 0 out of 9                     |
| SCFP_12                                       | -1358544872       | <p>AND Enantiomer</p>  <p><chem>[*]S(=[*])(=[*])N</chem></p>                             | -1.57        | 1 out of 15                    |

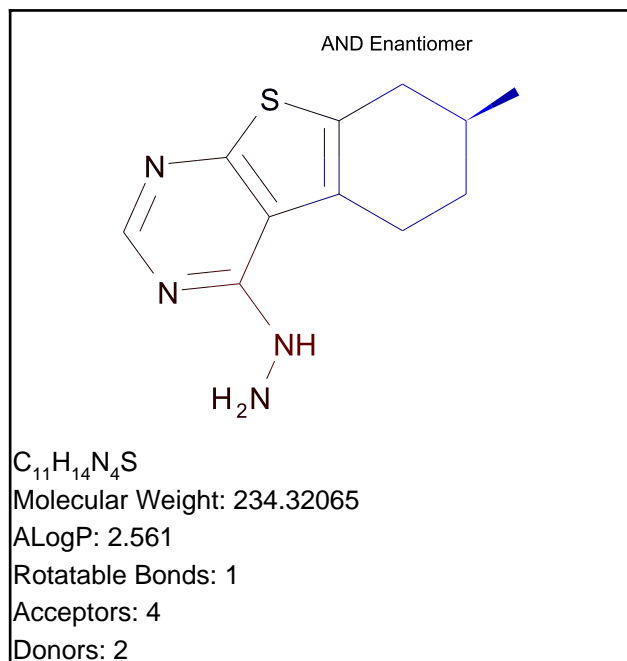

### Model Prediction

Prediction: Non-Mutagen

Probability: 0.712

Enrichment: 1.28

Bayesian Score: -1.25

Mahalanobis Distance: 10.5

Mahalanobis Distance p-value: 0.117

Prediction: Positive if the Bayesian score is above the estimated best cutoff value from minimizing the false positive and false negative rate.

Probability: The estimated probability that the sample is in the positive category. This assumes that the Bayesian score follows a normal distribution and is different from the prediction using a cutoff.

Enrichment: An estimate of enrichment, that is, the increased likelihood (versus random) of this sample being in the category.

Bayesian Score: The standard Laplacian-modified Bayesian score.

Mahalanobis Distance: The Mahalanobis distance (MD) is the distance to the center of the training data. The larger the MD, the less trustworthy the prediction.

Mahalanobis Distance p-value: The p-value gives the fraction of training data with an MD greater than or equal to the one for the given sample, assuming normally distributed data. The smaller the p-value, the less trustworthy the prediction. For highly non-normal X properties (e.g., fingerprints), the MD p-value is wildly inaccurate.

### Structural Similar Compounds

| Name               | Picloram                                                                            | 158321-20-1                                                                         | 96014-36-7                                                                          |
|--------------------|-------------------------------------------------------------------------------------|-------------------------------------------------------------------------------------|-------------------------------------------------------------------------------------|
| Structure          | 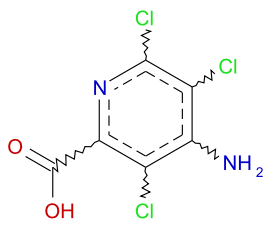 |  |  |
| Actual Endpoint    | Non-Mutagen                                                                         | Mutagen                                                                             | Mutagen                                                                             |
| Predicted Endpoint | Non-Mutagen                                                                         | Mutagen                                                                             | Mutagen                                                                             |
| Distance           | 0.522                                                                               | 0.540                                                                               | 0.540                                                                               |
| Reference          | Mut. Res. 204: 17-115; 1988                                                         | Kazius et. al., J. Med. Chem. (2005) 48, 312-320                                    | Kazius et. al., J. Med. Chem. (2005) 48, 312-320                                    |

### Model Applicability

Unknown features are fingerprint features in the query molecule, but not found or appearing too infrequently in the training set.

- All properties and OPS components are within expected ranges.

### Feature Contribution

#### Top features for positive contribution

| Fingerprint | Bit/Smiles | Feature Structure                                                                              | Score | Mutagen in training set |
|-------------|------------|------------------------------------------------------------------------------------------------|-------|-------------------------|
| SCFP_12     | 260535663  | 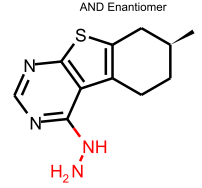<br>[*]NN | 0.442 | 13 out of 14            |

|                                               |                   |                                                                                                                                                                         |              |                                |
|-----------------------------------------------|-------------------|-------------------------------------------------------------------------------------------------------------------------------------------------------------------------|--------------|--------------------------------|
| SCFP_12                                       | -915345805        | <p>AND Enantiomer</p> 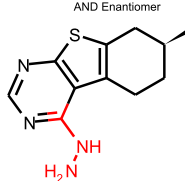 <p>[*]:[c](:[*])NN</p>                                        | 0.442        | 13 out of 14                   |
| SCFP_12                                       | 112346096         | <p>AND Enantiomer</p>  <p>[*][c](:[*]):[c]1:[c]<br/>([*]):[*]:[*]:[c]:1:<br/>[*]</p> | 0.36         | 1035 out of 1263               |
| <b>Top Features for negative contribution</b> |                   |                                                                                                                                                                         |              |                                |
| <b>Fingerprint</b>                            | <b>Bit/Smiles</b> | <b>Feature Structure</b>                                                                                                                                                | <b>Score</b> | <b>Mutagen in training set</b> |
| SCFP_12                                       | -55982834         | <p>AND Enantiomer</p>  <p>[*]:[c]1:[*]C[C@@H](C)CC1</p>                              | -1.82        | 0 out of 9                     |
| SCFP_12                                       | -1043339860       | <p>AND Enantiomer</p>  <p>[*]CC(C)C[*]</p>                                         | -1.09        | 76 out of 399                  |
| SCFP_12                                       | -1272798659       | <p>AND Enantiomer</p>  <p>[*]CCC([*])[*]</p>                                       | -0.466       | 439 out of 1225                |



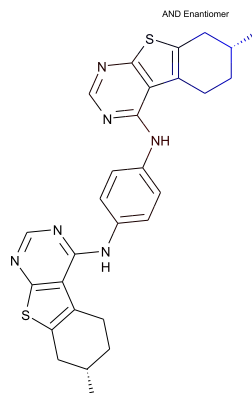

$C_{28}H_{28}N_6S_2$

Molecular Weight: 512.69212

ALogP: 7.842

Rotatable Bonds: 4

Acceptors: 6

Donors: 2

## Model Prediction

Prediction: Non-Mutagen

Probability: 0.658

Enrichment: 1.18

Bayesian Score: -3.27

Mahalanobis Distance: 9.58

Mahalanobis Distance p-value: 0.546

Prediction: Positive if the Bayesian score is above the estimated best cutoff value from minimizing the false positive and false negative rate.

Probability: The estimated probability that the sample is in the positive category. This assumes that the Bayesian score follows a normal distribution and is different from the prediction using a cutoff.

Enrichment: An estimate of enrichment, that is, the increased likelihood (versus random) of this sample being in the category.

Bayesian Score: The standard Laplacian-modified Bayesian score.

Mahalanobis Distance: The Mahalanobis distance (MD) is the distance to the center of the training data. The larger the MD, the less trustworthy the prediction.

Mahalanobis Distance p-value: The p-value gives the fraction of training data with an MD greater than or equal to the one for the given sample, assuming normally distributed data. The smaller the p-value, the less trustworthy the prediction. For highly non-normal X properties (e.g., fingerprints), the MD p-value is wildly inaccurate.

## Structural Similar Compounds

| Name               | 71422-67-8                                       | Pigment red 2                  | 69657-89-2                                       |
|--------------------|--------------------------------------------------|--------------------------------|--------------------------------------------------|
| Structure          |                                                  |                                |                                                  |
| Actual Endpoint    | Non-Mutagen                                      | Mutagen                        | Mutagen                                          |
| Predicted Endpoint | Non-Mutagen                                      | Mutagen                        | Mutagen                                          |
| Distance           | 0.693                                            | 0.699                          | 0.721                                            |
| Reference          | Kazius et. al., J. Med. Chem. (2005) 48, 312-320 | Environ. Mol. Mut. 19(21):1992 | Kazius et. al., J. Med. Chem. (2005) 48, 312-320 |

## Model Applicability

Unknown features are fingerprint features in the query molecule, but not found or appearing too infrequently in the training set.

1. All properties and OPS components are within expected ranges.

## Feature Contribution

### Top features for positive contribution

| Fingerprint | Bit/Smiles | Feature Structure                                                                              | Score | Mutagen in training set |
|-------------|------------|------------------------------------------------------------------------------------------------|-------|-------------------------|
| SCFP_12     | 112346096  | <br><chem>[*][c](:[*])[c]1:[c]</chem><br><chem>([*]):[*]:[*]:[c]:1:</chem><br><chem>[*]</chem> | 0.36  | 1035 out of 1263        |

|                                               |                   |                                                                                                                                                                                   |              |                                |
|-----------------------------------------------|-------------------|-----------------------------------------------------------------------------------------------------------------------------------------------------------------------------------|--------------|--------------------------------|
| SCFP_12                                       | 1310748454        | <p>AND Enantiomer</p> 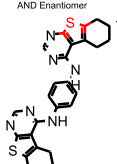 <p><chem>[*][c]1:[*]:[*]:[c](:[*]):s:1</chem></p>                       | 0.312        | 126 out of 161                 |
| SCFP_12                                       | 10                | <p>AND Enantiomer</p>  <p><chem>[*]N[*]</chem></p>                                             | 0.306        | 1774 out of 2287               |
| <b>Top Features for negative contribution</b> |                   |                                                                                                                                                                                   |              |                                |
| <b>Fingerprint</b>                            | <b>Bit/Smiles</b> | <b>Feature Structure</b>                                                                                                                                                          | <b>Score</b> | <b>Mutagen in training set</b> |
| SCFP_12                                       | -55982834         | <p>AND Enantiomer</p>  <p><chem>[*]:[c]1:[*]C[C@@H](C)CC1</chem></p>                           | -1.82        | 0 out of 9                     |
| SCFP_12                                       | -1043339860       | <p>AND Enantiomer</p>  <p><chem>[*]CC(C)C[*]</chem></p>                                       | -1.09        | 76 out of 399                  |
| SCFP_12                                       | 1328855840        | <p>AND Enantiomer</p>  <p><chem>[*]:[cH]:[c](N[c](:n:[*]):[c](:[*]):[*]):[cH]:[*]</chem></p> | -0.496       | 1 out of 4                     |

# Erlotinib

# TOPKAT\_Ames\_Mutagenicity

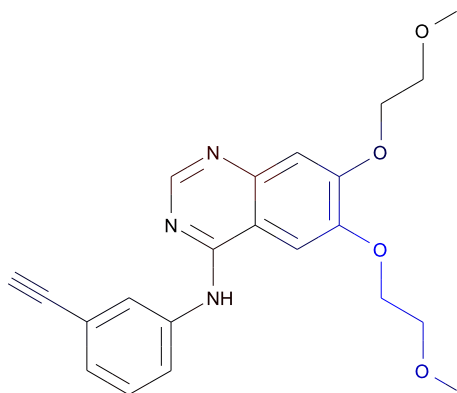

C<sub>22</sub>H<sub>23</sub>N<sub>3</sub>O<sub>4</sub>  
 Molecular Weight: 393.43572  
 ALogP: 4.309  
 Rotatable Bonds: 10  
 Acceptors: 7  
 Donors: 1

## Model Prediction

Prediction: Non-Mutagen

Probability: 0.6

Enrichment: 1.07

Bayesian Score: -5.04

Mahalanobis Distance: 14.6

Mahalanobis Distance p-value: 6.74e-011

Prediction: Positive if the Bayesian score is above the estimated best cutoff value from minimizing the false positive and false negative rate.

Probability: The estimated probability that the sample is in the positive category. This assumes that the Bayesian score follows a normal distribution and is different from the prediction using a cutoff.

Enrichment: An estimate of enrichment, that is, the increased likelihood (versus random) of this sample being in the category.

Bayesian Score: The standard Laplacian-modified Bayesian score.

Mahalanobis Distance: The Mahalanobis distance (MD) is the distance to the center of the training data. The larger the MD, the less trustworthy the prediction.

Mahalanobis Distance p-value: The p-value gives the fraction of training data with an MD greater than or equal to the one for the given sample, assuming normally distributed data. The smaller the p-value, the less trustworthy the prediction. For highly non-normal X properties (e.g., fingerprints), the MD p-value is wildly inaccurate.

## Structural Similar Compounds

| Name               | Carvedilol                                                                                                           | 99522-79-9                                                                          | HYCANTHONE FUROATE                                                                  |
|--------------------|----------------------------------------------------------------------------------------------------------------------|-------------------------------------------------------------------------------------|-------------------------------------------------------------------------------------|
| Structure          | 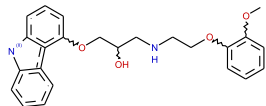                                  |  |  |
| Actual Endpoint    | Non-Mutagen                                                                                                          | Non-Mutagen                                                                         | Mutagen                                                                             |
| Predicted Endpoint | Non-Mutagen                                                                                                          | Non-Mutagen                                                                         | Mutagen                                                                             |
| Distance           | 0.594                                                                                                                | 0.598                                                                               | 0.606                                                                               |
| Reference          | Contrera, J.F., Matthews, E.J., Kruhlak, N.L., and Benz, R.D., Regulatory Toxicology and Pharmacology 2005, 313-323. | Kazius et. al., J. Med. Chem. (2005) 48, 312-320                                    | EMIC                                                                                |

## Model Applicability

Unknown features are fingerprint features in the query molecule, but not found or appearing too infrequently in the training set.

1. All properties and OPS components are within expected ranges.

## Feature Contribution

### Top features for positive contribution

| Fingerprint | Bit/Smiles | Feature Structure                                                                                                                                 | Score | Mutagen in training set |
|-------------|------------|---------------------------------------------------------------------------------------------------------------------------------------------------|-------|-------------------------|
| SCFP_12     | 112346096  | 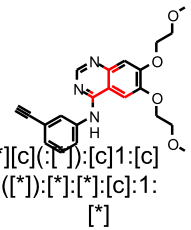<br><chem>[*][c]([c]1):[c]1:[c]([*])[*]:[*]:[c]:1:[*]</chem> | 0.36  | 1035 out of 1263        |

|                                               |                   |                                                                                                                                   |              |                                |
|-----------------------------------------------|-------------------|-----------------------------------------------------------------------------------------------------------------------------------|--------------|--------------------------------|
| SCFP_12                                       | 10                | 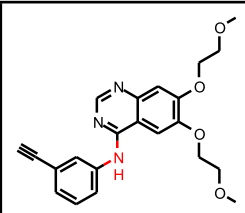<br>[*]N[*]                                     | 0.306        | 1774 out of 2287               |
| SCFP_12                                       | -1380909229       | <br>[*]N[c]1:[cH]:[*]:[c]<br>([*]):[cH]:[cH]:1 | 0.304        | 957 out of 1235                |
| <b>Top Features for negative contribution</b> |                   |                                                                                                                                   |              |                                |
| <b>Fingerprint</b>                            | <b>Bit/Smiles</b> | <b>Feature Structure</b>                                                                                                          | <b>Score</b> | <b>Mutagen in training set</b> |
| SCFP_12                                       | -1099149596       | <br>[*]OCCO[c](:[*]):[*]                       | -1.12        | 1 out of 9                     |
| SCFP_12                                       | -677502852        | <br>[*]C#C                                    | -0.863       | 4 out of 19                    |
| SCFP_12                                       | -417738003        | <br>[*]OCCOC                                 | -0.782       | 12 out of 48                   |

5a

## TOPKAT\_Developmental\_Toxicity\_Potential

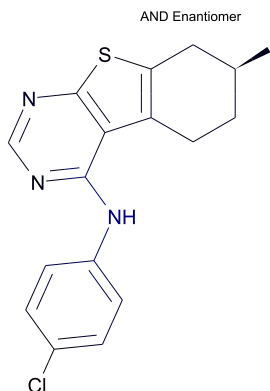C<sub>17</sub>H<sub>16</sub>ClN<sub>3</sub>S

Molecular Weight: 329.84704

ALogP: 5.5

Rotatable Bonds: 2

Acceptors: 3

Donors: 1

**Model Prediction**

Prediction: Non-Toxic

Probability: 0.419

Enrichment: 0.797

Bayesian Score: -3.75

Mahalanobis Distance: 11.5

Mahalanobis Distance p-value: 0.000182

Prediction: Positive if the Bayesian score is above the estimated best cutoff value from minimizing the false positive and false negative rate.

Probability: The estimated probability that the sample is in the positive category. This assumes that the Bayesian score follows a normal distribution and is different from the prediction using a cutoff.

Enrichment: An estimate of enrichment, that is, the increased likelihood (versus random) of this sample being in the category.

Bayesian Score: The standard Laplacian-modified Bayesian score.

Mahalanobis Distance: The Mahalanobis distance (MD) is the distance to the center of the training data. The larger the MD, the less trustworthy the prediction.

Mahalanobis Distance p-value: The p-value gives the fraction of training data with an MD greater than or equal to the one for the given sample, assuming normally distributed data. The smaller the p-value, the less trustworthy the prediction. For highly non-normal X properties (e.g., fingerprints), the MD p-value is wildly inaccurate.

**Structural Similar Compounds**

| Name               | Triclabendazole                | Meclofenamate Sodium (Free acid form) | Nitrofen                                |
|--------------------|--------------------------------|---------------------------------------|-----------------------------------------|
| Structure          |                                |                                       |                                         |
| Actual Endpoint    | Toxic                          | Non-Toxic                             | Toxic                                   |
| Predicted Endpoint | Toxic                          | Non-Toxic                             | Toxic                                   |
| Distance           | 0.531                          | 0.601                                 | 0.613                                   |
| Reference          | Toxicology 43(3):283-287; 1987 | Fundam Appl Toxicol 5:665-671; 1985   | Environ Health Perspect 70:137-47; 1986 |

**Model Applicability**

Unknown features are fingerprint features in the query molecule, but not found or appearing too infrequently in the training set.

1. All properties and OPS components are within expected ranges.

**Feature Contribution****Top features for positive contribution**

| Fingerprint | Bit/Smiles | Feature Structure    | Score | Toxic in training set |
|-------------|------------|----------------------|-------|-----------------------|
| SCFP_6      | 1181430618 | <br>[*]:n:[cH]:n:[*] | 0.298 | 6 out of 8            |

|                                               |                   |                                                                                                                                                                              |              |                              |
|-----------------------------------------------|-------------------|------------------------------------------------------------------------------------------------------------------------------------------------------------------------------|--------------|------------------------------|
| SCFP_6                                        | 815479470         | <p>AND Enantiomer</p> 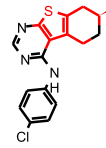 <p><chem>[*][C@H]1[*]C[c]2:[c](C1):s:[c]([*]):[c]:2:[*]</chem></p> | 0.271        | 1 out of 1                   |
| SCFP_6                                        | 1905487031        | <p>AND Enantiomer</p>  <p><chem>[*][c]1:[cH]:[cH]:[c](Cl):[cH]:[cH]:1</chem></p>          | 0.153        | 2 out of 3                   |
| <b>Top Features for negative contribution</b> |                   |                                                                                                                                                                              |              |                              |
| <b>Fingerprint</b>                            | <b>Bit/Smiles</b> | <b>Feature Structure</b>                                                                                                                                                     | <b>Score</b> | <b>Toxic in training set</b> |
| SCFP_6                                        | -300914917        | <p>AND Enantiomer</p>  <p><chem>[*]:[c](:[*])N[c]1:[cH]:[cH]:[*]:[cH]:[cH]:1</chem></p>   | -0.718       | 0 out of 2                   |
| SCFP_6                                        | -1380909229       | <p>AND Enantiomer</p>  <p><chem>[*]N[c]1:[cH]:[*]:[c]([*]):[cH]:[cH]:1</chem></p>        | -0.449       | 6 out of 19                  |
| SCFP_6                                        | 951581613         | <p>AND Enantiomer</p>  <p><chem>[*]:[c](:[*])N[c]([*]):[*]</chem></p>                   | -0.438       | 1 out of 4                   |

5b

TOPKAT\_Developmental\_Toxicity\_Potential

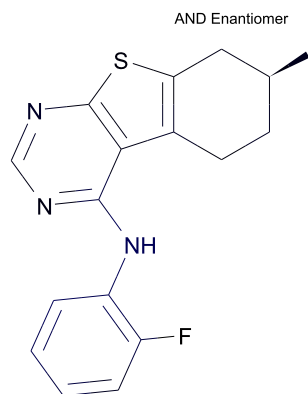C<sub>17</sub>H<sub>16</sub>FN<sub>3</sub>S

Molecular Weight: 313.39244

ALogP: 5.041

Rotatable Bonds: 2

Acceptors: 3

Donors: 1

### Model Prediction

Prediction: Non-Toxic

Probability: 0.435

Enrichment: 0.827

Bayesian Score: -3.23

Mahalanobis Distance: 11.1

Mahalanobis Distance p-value: 0.000905

Prediction: Positive if the Bayesian score is above the estimated best cutoff value from minimizing the false positive and false negative rate.

Probability: The estimated probability that the sample is in the positive category. This assumes that the Bayesian score follows a normal distribution and is different from the prediction using a cutoff.

Enrichment: An estimate of enrichment, that is, the increased likelihood (versus random) of this sample being in the category.

Bayesian Score: The standard Laplacian-modified Bayesian score.

Mahalanobis Distance: The Mahalanobis distance (MD) is the distance to the center of the training data. The larger the MD, the less trustworthy the prediction.

Mahalanobis Distance p-value: The p-value gives the fraction of training data with an MD greater than or equal to the one for the given sample, assuming normally distributed data. The smaller the p-value, the less trustworthy the prediction. For highly non-normal X properties (e.g., fingerprints), the MD p-value is wildly inaccurate.

### Structural Similar Compounds

| Name               | Triclabendazole                | Meclofenamate Sodium (Free acid form) | N-Cyclohexyl-2-benzothiazylsulfenamide |
|--------------------|--------------------------------|---------------------------------------|----------------------------------------|
| Structure          |                                |                                       |                                        |
| Actual Endpoint    | Toxic                          | Non-Toxic                             | Non-Toxic                              |
| Predicted Endpoint | Toxic                          | Non-Toxic                             | Non-Toxic                              |
| Distance           | 0.588                          | 0.602                                 | 0.611                                  |
| Reference          | Toxicology 43(3):283-287; 1987 | Fundam Appl Toxicol 5:665-671; 1985   | J Appl Toxicol 9(3):187-90; 1989       |

### Model Applicability

Unknown features are fingerprint features in the query molecule, but not found or appearing too infrequently in the training set.

- All properties and OPS components are within expected ranges.

### Feature Contribution

#### Top features for positive contribution

| Fingerprint | Bit/Smiles | Feature Structure    | Score | Toxic in training set |
|-------------|------------|----------------------|-------|-----------------------|
| SCFP_6      | 1181430618 | <br>[*]:n:[cH]:n:[*] | 0.298 | 6 out of 8            |

|                                               |                   |                                                                                                                                                                           |              |                              |
|-----------------------------------------------|-------------------|---------------------------------------------------------------------------------------------------------------------------------------------------------------------------|--------------|------------------------------|
| SCFP_6                                        | 815479470         | <p>AND Enantiomer</p> 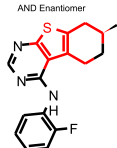 <p>[*][C@H]1[*]C[c]2:[c]<br/>(C1):s:[c]([*]):[c]<br/>:2:[*]</p> | 0.271        | 1 out of 1                   |
| SCFP_6                                        | -1551011249       | <p>AND Enantiomer</p>  <p>[*]N[c]1:[cH]:[*]:[cH]<br/>:[cH]:[c]:1F</p>                  | 0.271        | 1 out of 1                   |
| <b>Top Features for negative contribution</b> |                   |                                                                                                                                                                           |              |                              |
| <b>Fingerprint</b>                            | <b>Bit/Smiles</b> | <b>Feature Structure</b>                                                                                                                                                  | <b>Score</b> | <b>Toxic in training set</b> |
| SCFP_6                                        | 1655894345        | <p>AND Enantiomer</p>  <p>[*][c]1:[cH]:[cH]:[cH]<br/>:[cH]:[c]:1F</p>                  | -0.718       | 0 out of 2                   |
| SCFP_6                                        | -1380909229       | <p>AND Enantiomer</p>  <p>[*]N[c]1:[cH]:[*]:[c]<br/>([*]):[cH]:[cH]:1</p>             | -0.449       | 6 out of 19                  |
| SCFP_6                                        | 951581613         | <p>AND Enantiomer</p>  <p>[*]:[c](:[*])N[c](:[*]<br/>):[*]</p>                       | -0.438       | 1 out of 4                   |



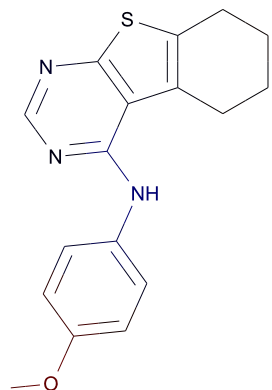

$C_{17}H_{17}N_3OS$

Molecular Weight: 311.40138

ALogP: 4.568

Rotatable Bonds: 3

Acceptors: 4

Donors: 1

## Model Prediction

Prediction: Non-Toxic

Probability: 0.495

Enrichment: 0.941

Bayesian Score: -1.44

Mahalanobis Distance: 10.5

Mahalanobis Distance p-value: 0.00495

Prediction: Positive if the Bayesian score is above the estimated best cutoff value from minimizing the false positive and false negative rate.

Probability: The estimated probability that the sample is in the positive category. This assumes that the Bayesian score follows a normal distribution and is different from the prediction using a cutoff.

Enrichment: An estimate of enrichment, that is, the increased likelihood (versus random) of this sample being in the category.

Bayesian Score: The standard Laplacian-modified Bayesian score.

Mahalanobis Distance: The Mahalanobis distance (MD) is the distance to the center of the training data. The larger the MD, the less trustworthy the prediction.

Mahalanobis Distance p-value: The p-value gives the fraction of training data with an MD greater than or equal to the one for the given sample, assuming normally distributed data. The smaller the p-value, the less trustworthy the prediction. For highly non-normal X properties (e.g., fingerprints), the MD p-value is wildly inaccurate.

## Structural Similar Compounds

| Name               | N-Cyclohexyl-2-benzothiazylsulfenamide | Nitrofen                                | Ronnel                                    |
|--------------------|----------------------------------------|-----------------------------------------|-------------------------------------------|
| Structure          |                                        |                                         |                                           |
| Actual Endpoint    | Non-Toxic                              | Toxic                                   | Toxic                                     |
| Predicted Endpoint | Non-Toxic                              | Toxic                                   | Toxic                                     |
| Distance           | 0.580                                  | 0.607                                   | 0.608                                     |
| Reference          | J Appl Toxicol 9(3):187-90; 1989       | Environ Health Perspect 70:137-47; 1986 | J Toxicol Environ Health 10:111-119; 1982 |

## Model Applicability

Unknown features are fingerprint features in the query molecule, but not found or appearing too infrequently in the training set.

- OPS PC12 out of range. Value: 3.4923. Training min, max, SD, explained variance: -3.7514, 3.3159, 1.318, 0.0255.

## Feature Contribution

### Top features for positive contribution

| Fingerprint | Bit/Smiles | Feature Structure                                 | Score | Toxic in training set |
|-------------|------------|---------------------------------------------------|-------|-----------------------|
| SCFP_6      | 1237755852 | <br><chem>CO[c]1:[cH]:[cH]:[*]:[cH]:[cH]:1</chem> | 0.453 | 8 out of 9            |

|                                               |                   |                                                                                                                                |              |                              |
|-----------------------------------------------|-------------------|--------------------------------------------------------------------------------------------------------------------------------|--------------|------------------------------|
| SCFP_6                                        | 591469355         | 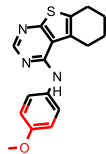<br>[*]:[cH]:[c](OC):[cH]<br>:[*]           | 0.411        | 10 out of 12                 |
| SCFP_6                                        | -1181430618       | <br>[*]:n:[cH]:n:[*]                        | 0.298        | 6 out of 8                   |
| <b>Top Features for negative contribution</b> |                   |                                                                                                                                |              |                              |
| <b>Fingerprint</b>                            | <b>Bit/Smiles</b> | <b>Feature Structure</b>                                                                                                       | <b>Score</b> | <b>Toxic in training set</b> |
| SCFP_6                                        | -300914917        | <br>[*]:[c]:[*]N[c]1:[cH]:[cH]:[cH]:[cH]:1  | -0.718       | 0 out of 2                   |
| SCFP_6                                        | -1380909229       | <br>[*]N[c]1:[cH]:[*]:[c]([*]):[cH]:[cH]:1 | -0.449       | 6 out of 19                  |
| SCFP_6                                        | 951581613         | <br>[*]:[c]:[*]N[c]:[*]:[*]               | -0.438       | 1 out of 4                   |

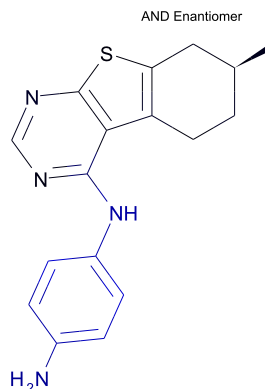

$C_{17}H_{18}N_4S$

Molecular Weight: 310.41662

ALogP: 4.089

Rotatable Bonds: 2

Acceptors: 4

Donors: 2

## Model Prediction

Prediction: Non-Toxic

Probability: 0.336

Enrichment: 0.639

Bayesian Score: -6.97

Mahalanobis Distance: 10.9

Mahalanobis Distance p-value: 0.00165

Prediction: Positive if the Bayesian score is above the estimated best cutoff value from minimizing the false positive and false negative rate.

Probability: The estimated probability that the sample is in the positive category. This assumes that the Bayesian score follows a normal distribution and is different from the prediction using a cutoff.

Enrichment: An estimate of enrichment, that is, the increased likelihood (versus random) of this sample being in the category.

Bayesian Score: The standard Laplacian-modified Bayesian score.

Mahalanobis Distance: The Mahalanobis distance (MD) is the distance to the center of the training data. The larger the MD, the less trustworthy the prediction.

Mahalanobis Distance p-value: The p-value gives the fraction of training data with an MD greater than or equal to the one for the given sample, assuming normally distributed data. The smaller the p-value, the less trustworthy the prediction. For highly non-normal X properties (e.g., fingerprints), the MD p-value is wildly inaccurate.

## Structural Similar Compounds

| Name               | D&C Yellow 8                       | N-Cyclohexyl-2-benzothiazylsulfenamide | Diflunisal                     |
|--------------------|------------------------------------|----------------------------------------|--------------------------------|
| Structure          |                                    |                                        |                                |
| Actual Endpoint    | Non-Toxic                          | Non-Toxic                              | Toxic                          |
| Predicted Endpoint | Non-Toxic                          | Non-Toxic                              | Toxic                          |
| Distance           | 0.614                              | 0.625                                  | 0.642                          |
| Reference          | Food Chem Toxicol 24:819-823; 1986 | J Appl Toxicol 9(3):187-90; 1989       | Oyo Yakuri 17(4):551-557; 1979 |

## Model Applicability

Unknown features are fingerprint features in the query molecule, but not found or appearing too infrequently in the training set.

1. All properties and OPS components are within expected ranges.

## Feature Contribution

### Top features for positive contribution

| Fingerprint | Bit/Smiles | Feature Structure                 | Score | Toxic in training set |
|-------------|------------|-----------------------------------|-------|-----------------------|
| SCFP_6      | 1181430618 | <br><chem>[*]:n:[cH]:n:[*]</chem> | 0.298 | 6 out of 8            |

|                                               |                   |                                                                                                                                                                                        |              |                              |
|-----------------------------------------------|-------------------|----------------------------------------------------------------------------------------------------------------------------------------------------------------------------------------|--------------|------------------------------|
| SCFP_6                                        | 815479470         | <p>AND Enantiomer</p> 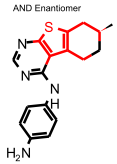 <p><chem>[*][C@H]1[*]C[c]2:[c]<br/>(C1):s:[c]([*]):[c]<br/>:2:[*]</chem></p> | 0.271        | 1 out of 1                   |
| SCFP_6                                        | -1272798659       | <p>AND Enantiomer</p>  <p><chem>[*]CCC([*])[*]</chem></p>                                           | 0.0708       | 44 out of 78                 |
| <b>Top Features for negative contribution</b> |                   |                                                                                                                                                                                        |              |                              |
| <b>Fingerprint</b>                            | <b>Bit/Smiles</b> | <b>Feature Structure</b>                                                                                                                                                               | <b>Score</b> | <b>Toxic in training set</b> |
| SCFP_6                                        | -192131231        | <p>AND Enantiomer</p>  <p><chem>N[c]1:[cH]:[cH]:[*]:[<br/>cH]:[cH]:1</chem></p>                     | -1.13        | 0 out of 4                   |
| SCFP_6                                        | 1181470699        | <p>AND Enantiomer</p>  <p><chem>[*][c]1:[cH]:[cH]:[c]<br/>(N):[cH]:[cH]:1</chem></p>               | -0.718       | 0 out of 2                   |
| SCFP_6                                        | -1728149235       | <p>AND Enantiomer</p>  <p><chem>[*]N[c]1:[cH]:[cH]:[c]<br/>(N):[cH]:[cH]:1</chem></p>             | -0.718       | 0 out of 2                   |

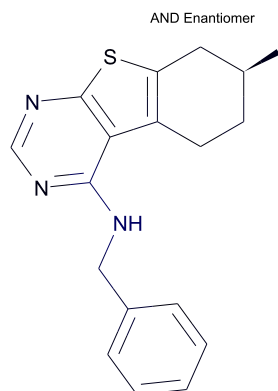

$C_{18}H_{19}N_3S$

Molecular Weight: 309.42856

ALogP: 4.678

Rotatable Bonds: 3

Acceptors: 3

Donors: 1

## Model Prediction

Prediction: Non-Toxic

Probability: 0.427

Enrichment: 0.811

Bayesian Score: -3.51

Mahalanobis Distance: 10.6

Mahalanobis Distance p-value: 0.00391

Prediction: Positive if the Bayesian score is above the estimated best cutoff value from minimizing the false positive and false negative rate.

Probability: The estimated probability that the sample is in the positive category. This assumes that the Bayesian score follows a normal distribution and is different from the prediction using a cutoff.

Enrichment: An estimate of enrichment, that is, the increased likelihood (versus random) of this sample being in the category.

Bayesian Score: The standard Laplacian-modified Bayesian score.

Mahalanobis Distance: The Mahalanobis distance (MD) is the distance to the center of the training data. The larger the MD, the less trustworthy the prediction.

Mahalanobis Distance p-value: The p-value gives the fraction of training data with an MD greater than or equal to the one for the given sample, assuming normally distributed data. The smaller the p-value, the less trustworthy the prediction. For highly non-normal X properties (e.g., fingerprints), the MD p-value is wildly inaccurate.

## Structural Similar Compounds

| Name               | N-Cyclohexyl-2-benzothiazylsulfenamide | Triclabendazole                | Meclofenamate Sodium (Free acid form) |
|--------------------|----------------------------------------|--------------------------------|---------------------------------------|
| Structure          |                                        |                                |                                       |
| Actual Endpoint    | Non-Toxic                              | Toxic                          | Non-Toxic                             |
| Predicted Endpoint | Non-Toxic                              | Toxic                          | Non-Toxic                             |
| Distance           | 0.592                                  | 0.601                          | 0.601                                 |
| Reference          | J Appl Toxicol 9(3):187-90; 1989       | Toxicology 43(3):283-287; 1987 | Fundam Appl Toxicol 5:665-671; 1985   |

## Model Applicability

Unknown features are fingerprint features in the query molecule, but not found or appearing too infrequently in the training set.

1. All properties and OPS components are within expected ranges.

## Feature Contribution

### Top features for positive contribution

| Fingerprint | Bit/Smiles  | Feature Structure    | Score | Toxic in training set |
|-------------|-------------|----------------------|-------|-----------------------|
| SCFP_6      | -1181430618 | <br>[*]:n:[cH]:n:[*] | 0.298 | 6 out of 8            |

|                                               |                   |                                                                                                                                                                          |              |                              |
|-----------------------------------------------|-------------------|--------------------------------------------------------------------------------------------------------------------------------------------------------------------------|--------------|------------------------------|
| SCFP_6                                        | 815479470         | <p>AND Enantiomer</p> 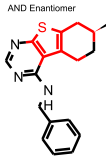 <p><chem>*[C@H]1*[C]c2:[c](C1):s:[c]([*]):[c]:2:[*]</chem></p> | 0.271        | 1 out of 1                   |
| SCFP_6                                        | -1272798659       | <p>AND Enantiomer</p>  <p><chem>*[C]C[C]([*])[*]</chem></p>                           | 0.0708       | 44 out of 78                 |
| <b>Top Features for negative contribution</b> |                   |                                                                                                                                                                          |              |                              |
| <b>Fingerprint</b>                            | <b>Bit/Smiles</b> | <b>Feature Structure</b>                                                                                                                                                 | <b>Score</b> | <b>Toxic in training set</b> |
| SCFP_6                                        | 18117904          | <p>AND Enantiomer</p>  <p><chem>*[C]N[c](:[*]):[*]</chem></p>                         | -0.945       | 0 out of 3                   |
| SCFP_6                                        | 1155330592        | <p>AND Enantiomer</p>  <p><chem>*[N]C[c](:[*]):[*]</chem></p>                        | -0.422       | 0 out of 1                   |
| SCFP_6                                        | -55982834         | <p>AND Enantiomer</p>  <p><chem>*[c]1:[*]C[C@@H](C)CC1</chem></p>                   | -0.422       | 0 out of 1                   |

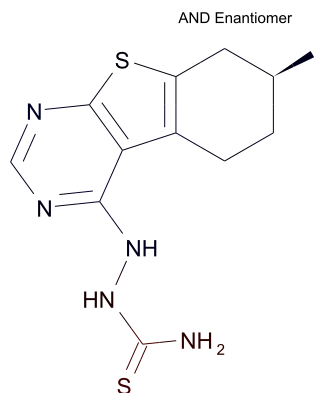

$C_{12}H_{15}N_5S_2$   
 Molecular Weight: 293.411  
 ALogP: 3.209  
 Rotatable Bonds: 3  
 Acceptors: 4  
 Donors: 3

### Model Prediction

Prediction: Non-Toxic

Probability: 0.529

Enrichment: 1.01

Bayesian Score: -0.498

Mahalanobis Distance: 11.2

Mahalanobis Distance p-value: 0.000502

Prediction: Positive if the Bayesian score is above the estimated best cutoff value from minimizing the false positive and false negative rate.

Probability: The estimated probability that the sample is in the positive category. This assumes that the Bayesian score follows a normal distribution and is different from the prediction using a cutoff.

Enrichment: An estimate of enrichment, that is, the increased likelihood (versus random) of this sample being in the category.  
 Bayesian Score: The standard Laplacian-modified Bayesian score.

Mahalanobis Distance: The Mahalanobis distance (MD) is the distance to the center of the training data. The larger the MD, the less trustworthy the prediction.

Mahalanobis Distance p-value: The p-value gives the fraction of training data with an MD greater than or equal to the one for the given sample, assuming normally distributed data. The smaller the p-value, the less trustworthy the prediction. For highly non-normal X properties (e.g., fingerprints), the MD p-value is wildly inaccurate.

### Structural Similar Compounds

| Name               | Caffeic Acid                              | Azosemide                         | Guanabenz                                  |
|--------------------|-------------------------------------------|-----------------------------------|--------------------------------------------|
| Structure          |                                           |                                   |                                            |
| Actual Endpoint    | Toxic                                     | Non-Toxic                         | Toxic                                      |
| Predicted Endpoint | Toxic                                     | Non-Toxic                         | Toxic                                      |
| Distance           | 0.723                                     | 0.732                             | 0.741                                      |
| Reference          | Toxicol Appl Pharmacol 36(2):227-37; 1976 | Kiso to Rinsho 18:5187-5195; 1984 | Journal of Toxic Sciences 11:107-119; 1982 |

### Model Applicability

Unknown features are fingerprint features in the query molecule, but not found or appearing too infrequently in the training set.

- All properties and OPS components are within expected ranges.

### Feature Contribution

#### Top features for positive contribution

| Fingerprint | Bit/Smiles | Feature Structure           | Score | Toxic in training set |
|-------------|------------|-----------------------------|-------|-----------------------|
| SCFP_6      | 382734644  | <br><chem>[*]NC(=S)N</chem> | 0.478 | 4 out of 4            |

|                                               |                   |                                                                                                                                                        |              |                              |
|-----------------------------------------------|-------------------|--------------------------------------------------------------------------------------------------------------------------------------------------------|--------------|------------------------------|
| SCFP_6                                        | 1435188938        | <p>AND Enantiomer</p> 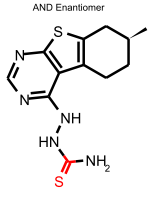 <p>[*]C(=S)[*]</p>                           | 0.478        | 4 out of 4                   |
| SCFP_6                                        | 384861283         | <p>AND Enantiomer</p>  <p>[*]C(=[*])N</p>                           | 0.441        | 3 out of 3                   |
| <b>Top Features for negative contribution</b> |                   |                                                                                                                                                        |              |                              |
| <b>Fingerprint</b>                            | <b>Bit/Smiles</b> | <b>Feature Structure</b>                                                                                                                               | <b>Score</b> | <b>Toxic in training set</b> |
| SCFP_6                                        | -55982834         | <p>AND Enantiomer</p>  <p>[*]:[c]1:[*]C[C@H](C)CC1</p>              | -0.422       | 0 out of 1                   |
| SCFP_6                                        | -2147171373       | <p>AND Enantiomer</p>  <p>[*]N[c]1:n:[cH]:n:[*]<br/>:[c]:1:[*]</p> | -0.422       | 0 out of 1                   |
| SCFP_6                                        | 8                 | <p>AND Enantiomer</p>  <p>[*]:n:[*]</p>                           | -0.278       | 24 out of 61                 |



9a

## TOPKAT\_Developmental\_Toxicity\_Potential

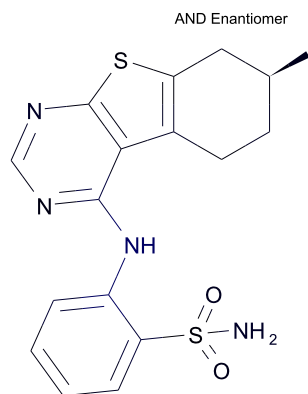
 $C_{17}H_{18}N_4O_2S_2$ 

Molecular Weight: 374.48042

ALogP: 3.541

Rotatable Bonds: 3

Acceptors: 5

Donors: 2

**Model Prediction**

Prediction: Non-Toxic

Probability: 0.419

Enrichment: 0.797

Bayesian Score: -3.75

Mahalanobis Distance: 12

Mahalanobis Distance p-value: 3.47e-005

Prediction: Positive if the Bayesian score is above the estimated best cutoff value from minimizing the false positive and false negative rate.

Probability: The estimated probability that the sample is in the positive category. This assumes that the Bayesian score follows a normal distribution and is different from the prediction using a cutoff.

Enrichment: An estimate of enrichment, that is, the increased likelihood (versus random) of this sample being in the category.

Bayesian Score: The standard Laplacian-modified Bayesian score.

Mahalanobis Distance: The Mahalanobis distance (MD) is the distance to the center of the training data. The larger the MD, the less trustworthy the prediction.

Mahalanobis Distance p-value: The p-value gives the fraction of training data with an MD greater than or equal to the one for the given sample, assuming normally distributed data. The smaller the p-value, the less trustworthy the prediction. For highly non-normal X properties (e.g., fingerprints), the MD p-value is wildly inaccurate.

**Structural Similar Compounds**

| Name               | D&C Yellow 8                       | Sulfonylurea Gliclazide            | Amsacrine                             |
|--------------------|------------------------------------|------------------------------------|---------------------------------------|
| Structure          |                                    |                                    |                                       |
| Actual Endpoint    | Non-Toxic                          | Toxic                              | Toxic                                 |
| Predicted Endpoint | Non-Toxic                          | Toxic                              | Toxic                                 |
| Distance           | 0.654                              | 0.658                              | 0.664                                 |
| Reference          | Food Chem Toxicol 24:819-823; 1986 | Yakuri to Chiryo 9:3551-3571; 1981 | Fundam Appl Toxicol 7(2):214-20; 1986 |

**Model Applicability**

Unknown features are fingerprint features in the query molecule, but not found or appearing too infrequently in the training set.

1. All properties and OPS components are within expected ranges.

**Feature Contribution****Top features for positive contribution**

| Fingerprint | Bit/Smiles  | Feature Structure       | Score | Toxic in training set |
|-------------|-------------|-------------------------|-------|-----------------------|
| SCFP_6      | -1181430618 | <p>[*]:n:[CH]:n:[*]</p> | 0.298 | 6 out of 8            |

|                                               |                   |                                                                                                                                                                              |              |                              |
|-----------------------------------------------|-------------------|------------------------------------------------------------------------------------------------------------------------------------------------------------------------------|--------------|------------------------------|
| SCFP_6                                        | 1655803608        | <p>AND Enantiomer</p> 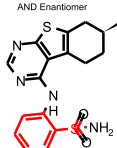 <p>[*][c]1:[cH]:[cH]:[cH]<br/>]:[cH]:[c]:1S(=[*])<br/>=[*])[*]</p> | 0.271        | 1 out of 1                   |
| SCFP_6                                        | 815479470         | <p>AND Enantiomer</p>  <p>[*][C@H]1[*]C[c]2:[c]<br/>(C1):s:[c]([*]):[c]<br/>:2:[*]</p>    | 0.271        | 1 out of 1                   |
| <b>Top Features for negative contribution</b> |                   |                                                                                                                                                                              |              |                              |
| <b>Fingerprint</b>                            | <b>Bit/Smiles</b> | <b>Feature Structure</b>                                                                                                                                                     | <b>Score</b> | <b>Toxic in training set</b> |
| SCFP_6                                        | -1463646519       | <p>AND Enantiomer</p>  <p>[*][c](:[*]):[c](:[cH]<br/>):[*]S(=O)(=O)N</p>                  | -0.718       | 0 out of 2                   |
| SCFP_6                                        | -1380909229       | <p>AND Enantiomer</p>  <p>[*]N[c]1:[cH]:[*]:[c]<br/>([*]):[cH]:[cH]:1</p>                | -0.449       | 6 out of 19                  |
| SCFP_6                                        | 951581613         | <p>AND Enantiomer</p>  <p>[*]:[c](:[*])N[c](:[*]<br/>):[*]</p>                          | -0.438       | 1 out of 4                   |

9b

## TOPKAT\_Developmental\_Toxicity\_Potential

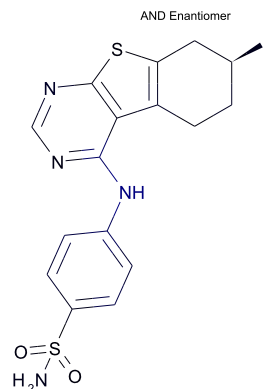C<sub>17</sub>H<sub>18</sub>N<sub>4</sub>O<sub>2</sub>S<sub>2</sub>

Molecular Weight: 374.48042

ALogP: 3.541

Rotatable Bonds: 3

Acceptors: 5

Donors: 2

**Model Prediction**

Prediction: Non-Toxic

Probability: 0.411

Enrichment: 0.781

Bayesian Score: -4.03

Mahalanobis Distance: 12.2

Mahalanobis Distance p-value: 1.11e-005

Prediction: Positive if the Bayesian score is above the estimated best cutoff value from minimizing the false positive and false negative rate.

Probability: The estimated probability that the sample is in the positive category. This assumes that the Bayesian score follows a normal distribution and is different from the prediction using a cutoff.

Enrichment: An estimate of enrichment, that is, the increased likelihood (versus random) of this sample being in the category.

Bayesian Score: The standard Laplacian-modified Bayesian score.

Mahalanobis Distance: The Mahalanobis distance (MD) is the distance to the center of the training data. The larger the MD, the less trustworthy the prediction.

Mahalanobis Distance p-value: The p-value gives the fraction of training data with an MD greater than or equal to the one for the given sample, assuming normally distributed data. The smaller the p-value, the less trustworthy the prediction. For highly non-normal X properties (e.g., fingerprints), the MD p-value is wildly inaccurate.

**Structural Similar Compounds**

| Name               | Sulfonylurea Gliclazide            | D&C Yellow 8                       | Amsacrine                             |
|--------------------|------------------------------------|------------------------------------|---------------------------------------|
| Structure          |                                    |                                    |                                       |
| Actual Endpoint    | Toxic                              | Non-Toxic                          | Toxic                                 |
| Predicted Endpoint | Toxic                              | Non-Toxic                          | Toxic                                 |
| Distance           | 0.651                              | 0.658                              | 0.668                                 |
| Reference          | Yakuri to Chiryo 9:3551-3571; 1981 | Food Chem Toxicol 24:819-823; 1986 | Fundam Appl Toxicol 7(2):214-20; 1986 |

**Model Applicability**

Unknown features are fingerprint features in the query molecule, but not found or appearing too infrequently in the training set.

1. All properties and OPS components are within expected ranges.

**Feature Contribution****Top features for positive contribution**

| Fingerprint | Bit/Smiles  | Feature Structure    | Score | Toxic in training set |
|-------------|-------------|----------------------|-------|-----------------------|
| SCFP_6      | -1181430618 | <br>[*]:n:[CH]:n:[*] | 0.298 | 6 out of 8            |

|                                               |                   |                                                                                                                                                                           |              |                              |
|-----------------------------------------------|-------------------|---------------------------------------------------------------------------------------------------------------------------------------------------------------------------|--------------|------------------------------|
| SCFP_6                                        | 815479470         | <p>AND Enantiomer</p> 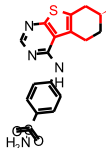 <p>[*][C@H]1[*]C[c]2:[c]<br/>(C1):s:[c]([*]):[c]<br/>:2:[*]</p> | 0.271        | 1 out of 1                   |
| SCFP_6                                        | -1247518081       | <p>AND Enantiomer</p>  <p>NS(=O)(=O)[c]1:[cH]:[<br/>cH]:[*]:[cH]:[cH]:1</p>            | 0.271        | 1 out of 1                   |
| <b>Top Features for negative contribution</b> |                   |                                                                                                                                                                           |              |                              |
| <b>Fingerprint</b>                            | <b>Bit/Smiles</b> | <b>Feature Structure</b>                                                                                                                                                  | <b>Score</b> | <b>Toxic in training set</b> |
| SCFP_6                                        | -300914917        | <p>AND Enantiomer</p>  <p>[*]:[c]([*])N[c]1:[c]<br/>H]:[cH]:[*]:[cH]:[cH]<br/>]:1</p>  | -0.718       | 0 out of 2                   |
| SCFP_6                                        | -1463646519       | <p>AND Enantiomer</p>  <p>[*][c]([*]):[c](:[cH]<br/>):[*])S(=O)(=O)N</p>              | -0.718       | 0 out of 2                   |
| SCFP_6                                        | -1380909229       | <p>AND Enantiomer</p>  <p>[*]N[c]1:[cH]:[*]:[c]<br/>([*]):[cH]:[cH]:1</p>            | -0.449       | 6 out of 19                  |

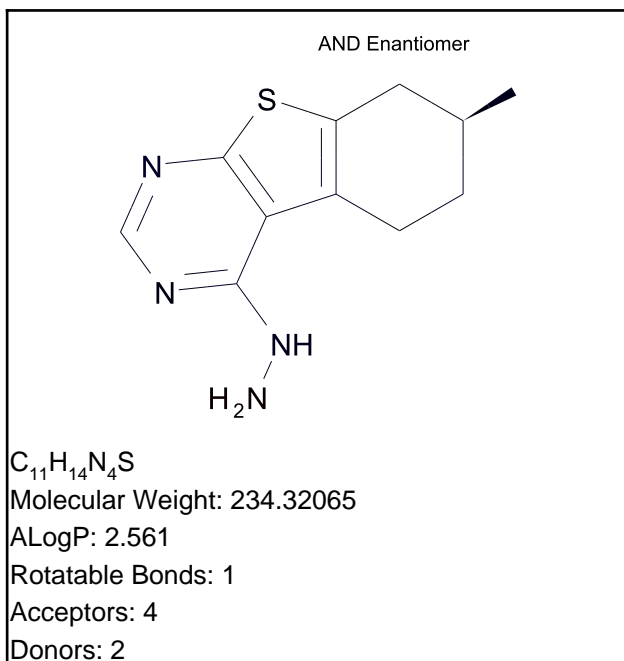

### Model Prediction

Prediction: Non-Toxic

Probability: 0.481

Enrichment: 0.915

Bayesian Score: -1.83

Mahalanobis Distance: 12.1

Mahalanobis Distance p-value: 2.12e-005

Prediction: Positive if the Bayesian score is above the estimated best cutoff value from minimizing the false positive and false negative rate.

Probability: The estimated probability that the sample is in the positive category. This assumes that the Bayesian score follows a normal distribution and is different from the prediction using a cutoff.

Enrichment: An estimate of enrichment, that is, the increased likelihood (versus random) of this sample being in the category.

Bayesian Score: The standard Laplacian-modified Bayesian score.

Mahalanobis Distance: The Mahalanobis distance (MD) is the distance to the center of the training data. The larger the MD, the less trustworthy the prediction.

Mahalanobis Distance p-value: The p-value gives the fraction of training data with an MD greater than or equal to the one for the given sample, assuming normally distributed data. The smaller the p-value, the less trustworthy the prediction. For highly non-normal X properties (e.g., fingerprints), the MD p-value is wildly inaccurate.

### Structural Similar Compounds

| Name               | Bropirime                                                                           | 3;6-Dichloropicolinic Acid                                                          | Caffeic Acid                                                                        |
|--------------------|-------------------------------------------------------------------------------------|-------------------------------------------------------------------------------------|-------------------------------------------------------------------------------------|
| Structure          | 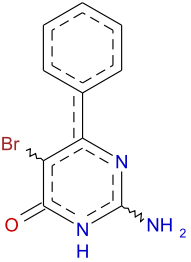 |  |  |
| Actual Endpoint    | Non-Toxic                                                                           | Non-Toxic                                                                           | Toxic                                                                               |
| Predicted Endpoint | Non-Toxic                                                                           | Non-Toxic                                                                           | Toxic                                                                               |
| Distance           | 0.667                                                                               | 0.685                                                                               | 0.687                                                                               |
| Reference          | Teratology 38(1):7-14; 1988                                                         | Fundam Appl Toxicol 4:91-97; 1984                                                   | Toxicol Appl Pharmacol 36(2):227-37; 1976                                           |

### Model Applicability

Unknown features are fingerprint features in the query molecule, but not found or appearing too infrequently in the training set.

1. All properties and OPS components are within expected ranges.

### Feature Contribution

#### Top features for positive contribution

| Fingerprint | Bit/Smiles  | Feature Structure                                                                                                                        | Score | Toxic in training set |
|-------------|-------------|------------------------------------------------------------------------------------------------------------------------------------------|-------|-----------------------|
| SCFP_6      | -1181430618 | 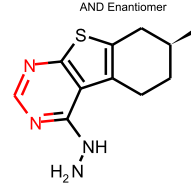<br>AND Enantiomer<br><chem>[*]:n:[cH]:n:[*]</chem> | 0.298 | 6 out of 8            |

|                                               |                   |                                                                                                                                                                              |              |                              |
|-----------------------------------------------|-------------------|------------------------------------------------------------------------------------------------------------------------------------------------------------------------------|--------------|------------------------------|
| SCFP_6                                        | 815479470         | <p>AND Enantiomer</p> 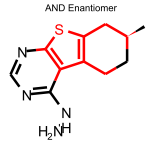 <p><chem>[*][C@H]1[*]C[c]2:[c](C1):s:[c]([*]):[c]:2:[*]</chem></p> | 0.271        | 1 out of 1                   |
| SCFP_6                                        | 5                 | <p>AND Enantiomer</p>  <p><chem>[*]N</chem></p>                                           | 0.228        | 51 out of 77                 |
| <b>Top Features for negative contribution</b> |                   |                                                                                                                                                                              |              |                              |
| <b>Fingerprint</b>                            | <b>Bit/Smiles</b> | <b>Feature Structure</b>                                                                                                                                                     | <b>Score</b> | <b>Toxic in training set</b> |
| SCFP_6                                        | -2147171373       | <p>AND Enantiomer</p>  <p><chem>[*]N[c]1:n:[cH]:n:[*]:[c]:1:[*]</chem></p>                | -0.422       | 0 out of 1                   |
| SCFP_6                                        | -55982834         | <p>AND Enantiomer</p>  <p><chem>[*]:[c]1:[*]C[C@H](C)CC1</chem></p>                     | -0.422       | 0 out of 1                   |
| SCFP_6                                        | 8                 | <p>AND Enantiomer</p>  <p><chem>[*]:n:[*]</chem></p>                                    | -0.278       | 24 out of 61                 |

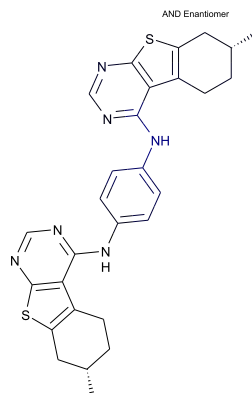

$C_{28}H_{28}N_6S_2$

Molecular Weight: 512.69212

ALogP: 7.842

Rotatable Bonds: 4

Acceptors: 6

Donors: 2

## Model Prediction

Prediction: Non-Toxic

Probability: 0.435

Enrichment: 0.827

Bayesian Score: -3.24

Mahalanobis Distance: 11.8

Mahalanobis Distance p-value: 5.91e-005

Prediction: Positive if the Bayesian score is above the estimated best cutoff value from minimizing the false positive and false negative rate.

Probability: The estimated probability that the sample is in the positive category. This assumes that the Bayesian score follows a normal distribution and is different from the prediction using a cutoff.

Enrichment: An estimate of enrichment, that is, the increased likelihood (versus random) of this sample being in the category.

Bayesian Score: The standard Laplacian-modified Bayesian score.

Mahalanobis Distance: The Mahalanobis distance (MD) is the distance to the center of the training data. The larger the MD, the less trustworthy the prediction.

Mahalanobis Distance p-value: The p-value gives the fraction of training data with an MD greater than or equal to the one for the given sample, assuming normally distributed data. The smaller the p-value, the less trustworthy the prediction. For highly non-normal X properties (e.g., fingerprints), the MD p-value is wildly inaccurate.

## Structural Similar Compounds

| Name               | Bromofenofos                     | Estramustine Phosphate Disodium (Free acid form) | Triclabendazole                |
|--------------------|----------------------------------|--------------------------------------------------|--------------------------------|
| Structure          |                                  |                                                  |                                |
| Actual Endpoint    | Toxic                            | Non-Toxic                                        | Toxic                          |
| Predicted Endpoint | Toxic                            | Non-Toxic                                        | Toxic                          |
| Distance           | 0.761                            | 0.793                                            | 0.838                          |
| Reference          | Toxicol Letters 31:243-247; 1986 | Oyo Yakuri 20(6):1219-1236; 1980                 | Toxicology 43(3):283-287; 1987 |

## Model Applicability

Unknown features are fingerprint features in the query molecule, but not found or appearing too infrequently in the training set.

- All properties and OPS components are within expected ranges.

## Feature Contribution

### Top features for positive contribution

| Fingerprint | Bit/Smiles | Feature Structure    | Score | Toxic in training set |
|-------------|------------|----------------------|-------|-----------------------|
| SCFP_6      | 1181430618 | <br>[*]:n:[cH]:n:[*] | 0.298 | 6 out of 8            |

| SCFP_6                                        | 815479470   | <p>AND Enantiomer</p> 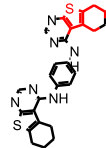 <p><chem>*[C@H]1*[C]c2:[c](C1):s:[c]([*]):[c]:2:[*]</chem></p>   | 0.271  | 1 out of 1            |
|-----------------------------------------------|-------------|----------------------------------------------------------------------------------------------------------------------------------------------------------------------------|--------|-----------------------|
| SCFP_6                                        | -1272798659 | <p>AND Enantiomer</p>  <p><chem>*]CCC([*])[*</chem></p>                                 | 0.0708 | 44 out of 78          |
| <b>Top Features for negative contribution</b> |             |                                                                                                                                                                            |        |                       |
| Fingerprint                                   | Bit/Smiles  | Feature Structure                                                                                                                                                          | Score  | Toxic in training set |
| SCFP_6                                        | -300914917  | <p>AND Enantiomer</p>  <p><chem>*]:[c](:[*])N[c]1:[c]H]:[cH]:[*]:[cH]:[cH]:1</chem></p> | -0.718 | 0 out of 2            |
| SCFP_6                                        | -1380909229 | <p>AND Enantiomer</p>  <p><chem>*]N[c]1:[cH]:[*]:[c]([*]):[cH]:[cH]:1</chem></p>       | -0.449 | 6 out of 19           |
| SCFP_6                                        | 951581613   | <p>AND Enantiomer</p>  <p><chem>*]:[c](:[*])N[c](:[*]):[*]</chem></p>                 | -0.438 | 1 out of 4            |





| SCFP_6                                        | 446954673   | 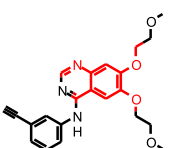<br>[*]CO[c]1:[cH]:[c]2:n<br>:[cH]:[*]:[c]([*]):[<br>c]:2:[cH]:[c]:1O[*] | 0.381  | 2 out of 2            |
|-----------------------------------------------|-------------|-------------------------------------------------------------------------------------------------------------------------------------------------------------|--------|-----------------------|
| SCFP_6                                        | -1814968949 | <br>[*]CO[c]1:[cH]:[c]2:[<br>c](N[*]):n:[*]:n:[c]<br>:2:[cH]:[c]:1O[*]   | 0.381  | 2 out of 2            |
| <b>Top Features for negative contribution</b> |             |                                                                                                                                                             |        |                       |
| Fingerprint                                   | Bit/Smiles  | Feature Structure                                                                                                                                           | Score  | Toxic in training set |
| SCFP_6                                        | -2020651081 | <br>[*][c]1:[cH]:[cH]:[cH]<br>:[c](N(c)([*]):[*]<br>):[cH]:1             | -0.718 | 0 out of 2            |
| SCFP_6                                        | 2142015375  | <br>[*]:[cH]:[c]1:n:[cH]:<br>n:[*]:[c]:1[*]                             | -0.718 | 0 out of 2            |
| SCFP_6                                        | -300914917  | <br>[*]:[c]([*])N[c]1:[c<br>H]:[cH]:[*]:[cH]:[cH]<br>]:1               | -0.718 | 0 out of 2            |

5a

## TOPKAT\_Mouse\_Female\_FDA\_None\_vs\_Carcinogen

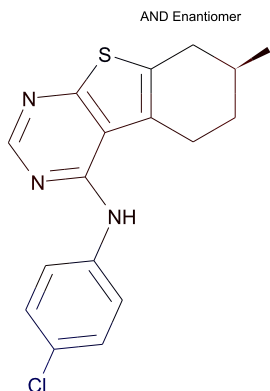C<sub>17</sub>H<sub>16</sub>ClN<sub>3</sub>S

Molecular Weight: 329.84704

ALogP: 5.5

Rotatable Bonds: 2

Acceptors: 3

Donors: 1

**Model Prediction****Prediction: Carcinogen**

Probability: 0.274

Enrichment: 0.855

Bayesian Score: 0.526

Mahalanobis Distance: 13.5

Mahalanobis Distance p-value: 8.88e-005

Prediction: Positive if the Bayesian score is above the estimated best cutoff value from minimizing the false positive and false negative rate.

Probability: The estimated probability that the sample is in the positive category. This assumes that the Bayesian score follows a normal distribution and is different from the prediction using a cutoff.

Enrichment: An estimate of enrichment, that is, the increased likelihood (versus random) of this sample being in the category.

Bayesian Score: The standard Laplacian-modified Bayesian score.

Mahalanobis Distance: The Mahalanobis distance (MD) is the distance to the center of the training data. The larger the MD, the less trustworthy the prediction.

Mahalanobis Distance p-value: The p-value gives the fraction of training data with an MD greater than or equal to the one for the given sample, assuming normally distributed data. The smaller the p-value, the less trustworthy the prediction. For highly non-normal X properties (e.g., fingerprints), the MD p-value is wildly inaccurate.

**Structural Similar Compounds**

| Name               | Nafenopin                                                           | Levonorgestrel                                                      | Indomethacin                                                        |
|--------------------|---------------------------------------------------------------------|---------------------------------------------------------------------|---------------------------------------------------------------------|
| Structure          |                                                                     |                                                                     |                                                                     |
| Actual Endpoint    | Carcinogen                                                          | Carcinogen                                                          | Non-Carcinogen                                                      |
| Predicted Endpoint | Carcinogen                                                          | Carcinogen                                                          | Non-Carcinogen                                                      |
| Distance           | 0.629                                                               | 0.647                                                               | 0.652                                                               |
| Reference          | US FDA (Centre for Drug Eval.& Res./Off. Testing & Res.) Sept. 1997 | US FDA (Centre for Drug Eval.& Res./Off. Testing & Res.) Sept. 1997 | US FDA (Centre for Drug Eval.& Res./Off. Testing & Res.) Sept. 1997 |

**Model Applicability**

Unknown features are fingerprint features in the query molecule, but not found or appearing too infrequently in the training set.

1. All properties and OPS components are within expected ranges.
2. Unknown ECFP<sub>2</sub> feature: -1597579789: [\*]:n:[c]1:s:[\*]:[\*]:[c]:1:[\*]

**Feature Contribution****Top features for positive contribution**

| Fingerprint       | Bit/Smiles | Feature Structure      | Score | Carcinogen in training set |
|-------------------|------------|------------------------|-------|----------------------------|
| ECFP <sub>6</sub> | 51876938   | <br>[*]CC[c](:[*]):[*] | 0.473 | 16 out of 31               |

|                                               |                   |                                                                                                                                                                         |              |                                   |
|-----------------------------------------------|-------------------|-------------------------------------------------------------------------------------------------------------------------------------------------------------------------|--------------|-----------------------------------|
| ECFP_6                                        | -1661653144       | <p>AND Enantiomer</p> 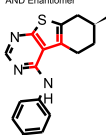 <p>[*][c](-[*]):[c]1:[c]<br/>([*]):[*]:[*]:[c]:1:<br/>[*]</p> | 0.442        | 2 out of 3                        |
| ECFP_6                                        | 553181281         | <p>AND Enantiomer</p>  <p>[*][C@@H]1[*][c]2:[*]<br/>:[*][c]([*]):[c]:2<br/>CC1</p>   | 0.424        | 1 out of 1                        |
| <b>Top Features for negative contribution</b> |                   |                                                                                                                                                                         |              |                                   |
| <b>Fingerprint</b>                            | <b>Bit/Smiles</b> | <b>Feature Structure</b>                                                                                                                                                | <b>Score</b> | <b>Carcinogen in training set</b> |
| ECFP_6                                        | -1242906247       | <p>AND Enantiomer</p>  <p>[*]:[c](:[*])N[c](:[*]<br/>):[*]</p>                       | -0.482       | 0 out of 2                        |
| ECFP_6                                        | -176494269        | <p>AND Enantiomer</p>  <p>[*]:[cH]:[c](Cl):[cH]<br/>:[*]</p>                        | -0.476       | 5 out of 28                       |
| ECFP_6                                        | 99947387          | <p>AND Enantiomer</p>  <p>[*]:[c](:[*])Cl</p>                                      | -0.461       | 9 out of 48                       |

5b

## TOPKAT\_Mouse\_Female\_FDA\_None\_vs\_Carcinogen

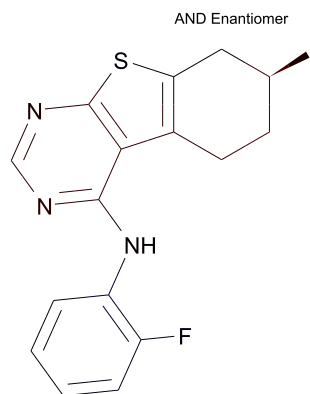C<sub>17</sub>H<sub>16</sub>FN<sub>3</sub>S

Molecular Weight: 313.39244

ALogP: 5.041

Rotatable Bonds: 2

Acceptors: 3

Donors: 1

**Model Prediction****Prediction: Carcinogen**

Probability: 0.305

Enrichment: 0.951

Bayesian Score: 1.75

Mahalanobis Distance: 11.3

Mahalanobis Distance p-value: 0.0631

Prediction: Positive if the Bayesian score is above the estimated best cutoff value from minimizing the false positive and false negative rate.

Probability: The estimated probability that the sample is in the positive category. This assumes that the Bayesian score follows a normal distribution and is different from the prediction using a cutoff.

Enrichment: An estimate of enrichment, that is, the increased likelihood (versus random) of this sample being in the category.

Bayesian Score: The standard Laplacian-modified Bayesian score.

Mahalanobis Distance: The Mahalanobis distance (MD) is the distance to the center of the training data. The larger the MD, the less trustworthy the prediction.

Mahalanobis Distance p-value: The p-value gives the fraction of training data with an MD greater than or equal to the one for the given sample, assuming normally distributed data. The smaller the p-value, the less trustworthy the prediction. For highly non-normal X properties (e.g., fingerprints), the MD p-value is wildly inaccurate.

**Structural Similar Compounds**

| Name               | Nafenopin                                                           | Levonorgestrel                                                      | Diclofenac                                                          |
|--------------------|---------------------------------------------------------------------|---------------------------------------------------------------------|---------------------------------------------------------------------|
| Structure          |                                                                     |                                                                     |                                                                     |
| Actual Endpoint    | Carcinogen                                                          | Carcinogen                                                          | Non-Carcinogen                                                      |
| Predicted Endpoint | Carcinogen                                                          | Carcinogen                                                          | Non-Carcinogen                                                      |
| Distance           | 0.613                                                               | 0.640                                                               | 0.654                                                               |
| Reference          | US FDA (Centre for Drug Eval.& Res./Off. Testing & Res.) Sept. 1997 | US FDA (Centre for Drug Eval.& Res./Off. Testing & Res.) Sept. 1997 | US FDA (Centre for Drug Eval.& Res./Off. Testing & Res.) Sept. 1997 |

**Model Applicability**

Unknown features are fingerprint features in the query molecule, but not found or appearing too infrequently in the training set.

1. All properties and OPS components are within expected ranges.
2. Unknown ECFP<sub>2</sub> feature: -1597579789: [\*]:n:[c]1:s:[\*]:[\*]:[c]:1:[\*]

**Feature Contribution****Top features for positive contribution**

| Fingerprint       | Bit/Smiles | Feature Structure                               | Score | Carcinogen in training set |
|-------------------|------------|-------------------------------------------------|-------|----------------------------|
| ECFP <sub>6</sub> | 51876938   | <p>AND Enantiomer</p> <p>[*]CC[c](:[*]):[*]</p> | 0.473 | 16 out of 31               |

|                                               |                   |                                                                                                                                                                         |              |                                   |
|-----------------------------------------------|-------------------|-------------------------------------------------------------------------------------------------------------------------------------------------------------------------|--------------|-----------------------------------|
| ECFP_6                                        | -1661653144       | <p>AND Enantiomer</p> 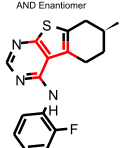 <p>[*][c](:[*]):[c]1:[c]<br/>([*]):[*]:[*]:[c]:1:<br/>[*]</p> | 0.442        | 2 out of 3                        |
| ECFP_6                                        | -1448786963       | <p>AND Enantiomer</p>  <p>[*][c]1:[*]:[c](:[*])<br/>:n:[cH]:n:1</p>                  | 0.424        | 1 out of 1                        |
| <b>Top Features for negative contribution</b> |                   |                                                                                                                                                                         |              |                                   |
| <b>Fingerprint</b>                            | <b>Bit/Smiles</b> | <b>Feature Structure</b>                                                                                                                                                | <b>Score</b> | <b>Carcinogen in training set</b> |
| ECFP_6                                        | -1242906247       | <p>AND Enantiomer</p>  <p>[*]:[c](:[*])N[c](:[*]<br/>):[*]</p>                       | -0.482       | 0 out of 2                        |
| ECFP_6                                        | -1311285389       | <p>AND Enantiomer</p>  <p>[*][c](:[*]):[c](F):[<br/>cH]:[*]</p>                     | -0.459       | 1 out of 7                        |
| ECFP_6                                        | -1672647522       | <p>AND Enantiomer</p>  <p>[*]C[c]1:s:[*]:[*]:[c]<br/>]:1[*]</p>                    | -0.27        | 0 out of 1                        |

5c

TOPKAT\_Mouse\_Female\_FDA\_None\_vs\_Carcinogen

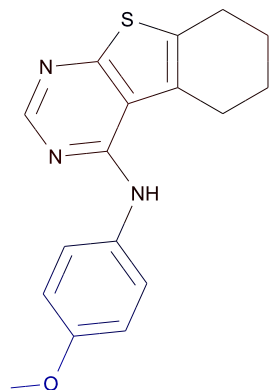C<sub>17</sub>H<sub>17</sub>N<sub>3</sub>OS

Molecular Weight: 311.40138

ALogP: 4.568

Rotatable Bonds: 3

Acceptors: 4

Donors: 1

### Model Prediction

Prediction: Non-Carcinogen

Probability: 0.244

Enrichment: 0.761

Bayesian Score: -1.06

Mahalanobis Distance: 12.6

Mahalanobis Distance p-value: 0.00166

Prediction: Positive if the Bayesian score is above the estimated best cutoff value from minimizing the false positive and false negative rate.

Probability: The estimated probability that the sample is in the positive category. This assumes that the Bayesian score follows a normal distribution and is different from the prediction using a cutoff.

Enrichment: An estimate of enrichment, that is, the increased likelihood (versus random) of this sample being in the category.

Bayesian Score: The standard Laplacian-modified Bayesian score.

Mahalanobis Distance: The Mahalanobis distance (MD) is the distance to the center of the training data. The larger the MD, the less trustworthy the prediction.

Mahalanobis Distance p-value: The p-value gives the fraction of training data with an MD greater than or equal to the one for the given sample, assuming normally distributed data. The smaller the p-value, the less trustworthy the prediction. For highly non-normal X properties (e.g., fingerprints), the MD p-value is wildly inaccurate.

### Structural Similar Compounds

| Name               | Indomethacin                                                        | Nafenopin                                                           | Phenolphthalein                                                     |
|--------------------|---------------------------------------------------------------------|---------------------------------------------------------------------|---------------------------------------------------------------------|
| Structure          |                                                                     |                                                                     |                                                                     |
| Actual Endpoint    | Non-Carcinogen                                                      | Carcinogen                                                          | Carcinogen                                                          |
| Predicted Endpoint | Non-Carcinogen                                                      | Carcinogen                                                          | Carcinogen                                                          |
| Distance           | 0.579                                                               | 0.624                                                               | 0.649                                                               |
| Reference          | US FDA (Centre for Drug Eval.& Res./Off. Testing & Res.) Sept. 1997 | US FDA (Centre for Drug Eval.& Res./Off. Testing & Res.) Sept. 1997 | US FDA (Centre for Drug Eval.& Res./Off. Testing & Res.) Sept. 1997 |

### Model Applicability

Unknown features are fingerprint features in the query molecule, but not found or appearing too infrequently in the training set.

1. All properties and OPS components are within expected ranges.
2. Unknown ECFP<sub>2</sub> feature: -1597579789: [\*]:n:[c]1:s:[\*]:[\*]:[c]:1:[\*]

### Feature Contribution

#### Top features for positive contribution

| Fingerprint       | Bit/Smiles | Feature Structure     | Score | Carcinogen in training set |
|-------------------|------------|-----------------------|-------|----------------------------|
| ECFP <sub>6</sub> | 51876938   | <br>[*]CC[c]([*]):[*] | 0.473 | 16 out of 31               |

|                                               |                   |                                                                                                                                                  |              |                                   |
|-----------------------------------------------|-------------------|--------------------------------------------------------------------------------------------------------------------------------------------------|--------------|-----------------------------------|
| ECFP_6                                        | -1661653144       | 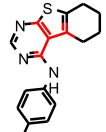<br><chem>[*][c](:[*]):[c]1:[c]([*]):[*]:[*]:[c]:1:[*]</chem> | 0.442        | 2 out of 3                        |
| ECFP_6                                        | -1448786963       | <br><chem>[*][c]1:[*]:[c](:[*])n:[cH]:n:1</chem>              | 0.424        | 1 out of 1                        |
| <b>Top Features for negative contribution</b> |                   |                                                                                                                                                  |              |                                   |
| <b>Fingerprint</b>                            | <b>Bit/Smiles</b> | <b>Feature Structure</b>                                                                                                                         | <b>Score</b> | <b>Carcinogen in training set</b> |
| ECFP_6                                        | -1271104377       | <br><chem>CO[c]1:[cH]:[cH]:[*]:[cH]:[cH]:1</chem>             | -0.805       | 0 out of 4                        |
| ECFP_6                                        | 693720869         | <br><chem>[*][c]1:[cH]:[cH]:[c](OC):[cH]:[cH]:1</chem>      | -0.805       | 0 out of 4                        |
| ECFP_6                                        | 1307307440        | <br><chem>[*]:[c](:[*])OC</chem>                            | -0.558       | 4 out of 25                       |



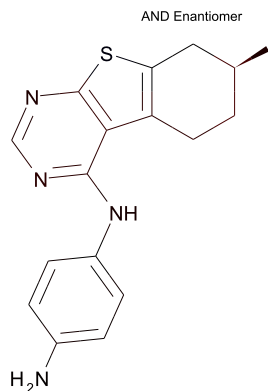

$C_{17}H_{18}N_4S$

Molecular Weight: 310.41662

ALogP: 4.089

Rotatable Bonds: 2

Acceptors: 4

Donors: 2

## Model Prediction

Prediction: **Carcinogen**

Probability: 0.33

Enrichment: 1.03

Bayesian Score: 2.59

Mahalanobis Distance: 11.5

Mahalanobis Distance p-value: 0.035

Prediction: Positive if the Bayesian score is above the estimated best cutoff value from minimizing the false positive and false negative rate.

Probability: The estimated probability that the sample is in the positive category. This assumes that the Bayesian score follows a normal distribution and is different from the prediction using a cutoff.

Enrichment: An estimate of enrichment, that is, the increased likelihood (versus random) of this sample being in the category.

Bayesian Score: The standard Laplacian-modified Bayesian score.

Mahalanobis Distance: The Mahalanobis distance (MD) is the distance to the center of the training data. The larger the MD, the less trustworthy the prediction.

Mahalanobis Distance p-value: The p-value gives the fraction of training data with an MD greater than or equal to the one for the given sample, assuming normally distributed data. The smaller the p-value, the less trustworthy the prediction. For highly non-normal X properties (e.g., fingerprints), the MD p-value is wildly inaccurate.

## Structural Similar Compounds

| Name               | Niclosamide                                                         | Phenolphthalein                                                     | Pyrimethamine                                                       |
|--------------------|---------------------------------------------------------------------|---------------------------------------------------------------------|---------------------------------------------------------------------|
| Structure          |                                                                     |                                                                     |                                                                     |
| Actual Endpoint    | Non-Carcinogen                                                      | Carcinogen                                                          | Non-Carcinogen                                                      |
| Predicted Endpoint | Non-Carcinogen                                                      | Carcinogen                                                          | Non-Carcinogen                                                      |
| Distance           | 0.568                                                               | 0.581                                                               | 0.626                                                               |
| Reference          | US FDA (Centre for Drug Eval.& Res./Off. Testing & Res.) Sept. 1997 | US FDA (Centre for Drug Eval.& Res./Off. Testing & Res.) Sept. 1997 | US FDA (Centre for Drug Eval.& Res./Off. Testing & Res.) Sept. 1997 |

## Model Applicability

Unknown features are fingerprint features in the query molecule, but not found or appearing too infrequently in the training set.

1. All properties and OPS components are within expected ranges.
2. Unknown ECFP\_2 feature: -1597579789: [\*]:n:[c]1:s:[\*]:[\*]:[c]:1:[\*]

## Feature Contribution

### Top features for positive contribution

| Fingerprint | Bit/Smiles | Feature Structure                                                                                                                     | Score | Carcinogen in training set |
|-------------|------------|---------------------------------------------------------------------------------------------------------------------------------------|-------|----------------------------|
| ECFP_6      | 51876938   | <p>Chemical structure of the query molecule, highlighted in red, with the SMILES string <chem>[*]CC[c](:[*]):[*]</chem> below it.</p> | 0.473 | 16 out of 31               |

|                                               |                   |                                                                                                                                                                        |              |                                   |
|-----------------------------------------------|-------------------|------------------------------------------------------------------------------------------------------------------------------------------------------------------------|--------------|-----------------------------------|
| ECFP_6                                        | -1661653144       | <p>AND Enantiomer</p> 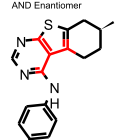 <p>[*][c]([*]):[c]1:[c]<br/>([*]):[*]:[*]:[c]:1:<br/>[*]</p> | 0.442        | 2 out of 3                        |
| ECFP_6                                        | -1448786963       | <p>AND Enantiomer</p>  <p>[*][c]1:[*]:[c]([*])<br/>:n:[cH]:n:1</p>                  | 0.424        | 1 out of 1                        |
| <b>Top Features for negative contribution</b> |                   |                                                                                                                                                                        |              |                                   |
| <b>Fingerprint</b>                            | <b>Bit/Smiles</b> | <b>Feature Structure</b>                                                                                                                                               | <b>Score</b> | <b>Carcinogen in training set</b> |
| ECFP_6                                        | -1242906247       | <p>AND Enantiomer</p>  <p>[*]:[c]([*])N[c]([*]<br/>):[*]</p>                        | -0.482       | 0 out of 2                        |
| ECFP_6                                        | -1672647522       | <p>AND Enantiomer</p>  <p>[*]C[c]1:s:[*]:[*]:[c]<br/>:1[*]</p>                     | -0.27        | 0 out of 1                        |
| ECFP_6                                        | -1660340418       | <p>AND Enantiomer</p>  <p>[*]C[c]1:[c]([*]):[*]<br/>:[*]:[c]:1:[*]</p>            | -0.232       | 2 out of 9                        |

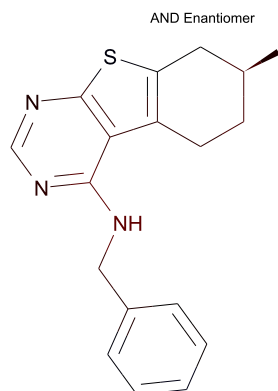

$C_{18}H_{19}N_3S$

Molecular Weight: 309.42856

ALogP: 4.678

Rotatable Bonds: 3

Acceptors: 3

Donors: 1

## Model Prediction

Prediction: **Carcinogen**

Probability: 0.35

Enrichment: 1.09

Bayesian Score: 3.17

Mahalanobis Distance: 12.9

Mahalanobis Distance p-value: 0.000738

Prediction: Positive if the Bayesian score is above the estimated best cutoff value from minimizing the false positive and false negative rate.

Probability: The estimated probability that the sample is in the positive category. This assumes that the Bayesian score follows a normal distribution and is different from the prediction using a cutoff.

Enrichment: An estimate of enrichment, that is, the increased likelihood (versus random) of this sample being in the category.

Bayesian Score: The standard Laplacian-modified Bayesian score.

Mahalanobis Distance: The Mahalanobis distance (MD) is the distance to the center of the training data. The larger the MD, the less trustworthy the prediction.

Mahalanobis Distance p-value: The p-value gives the fraction of training data with an MD greater than or equal to the one for the given sample, assuming normally distributed data. The smaller the p-value, the less trustworthy the prediction. For highly non-normal X properties (e.g., fingerprints), the MD p-value is wildly inaccurate.

## Structural Similar Compounds

| Name               | Nafenopin                                                           | Pergolide                                                           | Oxaprocin                                                           |
|--------------------|---------------------------------------------------------------------|---------------------------------------------------------------------|---------------------------------------------------------------------|
| Structure          |                                                                     |                                                                     |                                                                     |
| Actual Endpoint    | Carcinogen                                                          | Carcinogen                                                          | Non-Carcinogen                                                      |
| Predicted Endpoint | Carcinogen                                                          | Carcinogen                                                          | Non-Carcinogen                                                      |
| Distance           | 0.566                                                               | 0.613                                                               | 0.617                                                               |
| Reference          | US FDA (Centre for Drug Eval.& Res./Off. Testing & Res.) Sept. 1997 | US FDA (Centre for Drug Eval.& Res./Off. Testing & Res.) Sept. 1997 | US FDA (Centre for Drug Eval.& Res./Off. Testing & Res.) Sept. 1997 |

## Model Applicability

Unknown features are fingerprint features in the query molecule, but not found or appearing too infrequently in the training set.

1. All properties and OPS components are within expected ranges.
2. Unknown ECFP\_2 feature: -1597579789: [\*]:n:[c]1:s:[\*]:[\*]:[c]:1:[\*]

## Feature Contribution

### Top features for positive contribution

| Fingerprint | Bit/Smiles | Feature Structure                   | Score | Carcinogen in training set |
|-------------|------------|-------------------------------------|-------|----------------------------|
| ECFP_6      | 769925792  | <br><chem>[*]NC[c](:[*]):[*]</chem> | 0.617 | 2 out of 2                 |

|                                               |                   |                                                                                                                                                                         |              |                                   |
|-----------------------------------------------|-------------------|-------------------------------------------------------------------------------------------------------------------------------------------------------------------------|--------------|-----------------------------------|
| ECFP_6                                        | 51876938          | <p>AND Enantiomer</p> 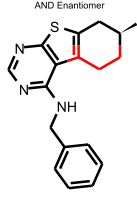 <p>[*]CC[c](:[*]):[*]</p>                                     | 0.473        | 16 out of 31                      |
| ECFP_6                                        | -1661653144       | <p>AND Enantiomer</p>  <p>[*][c](:[*]):[c]1:[c]<br/>([*]):[*]:[*]:[c]:1:<br/>[*]</p> | 0.442        | 2 out of 3                        |
| <b>Top Features for negative contribution</b> |                   |                                                                                                                                                                         |              |                                   |
| <b>Fingerprint</b>                            | <b>Bit/Smiles</b> | <b>Feature Structure</b>                                                                                                                                                | <b>Score</b> | <b>Carcinogen in training set</b> |
| ECFP_6                                        | -1672647522       | <p>AND Enantiomer</p>  <p>[*]C[c]1:s:[*]:[*]:[c]<br/>]:1[*]</p>                      | -0.27        | 0 out of 1                        |
| ECFP_6                                        | -1660340418       | <p>AND Enantiomer</p>  <p>[*]C[c]1:[c]([*]):[*]<br/>:[*]:[c]:1:[*]</p>              | -0.232       | 2 out of 9                        |
| ECFP_6                                        | 1559650422        | <p>AND Enantiomer</p>  <p>[*]C[*]</p>                                              | -0.164       | 50 out of 191                     |

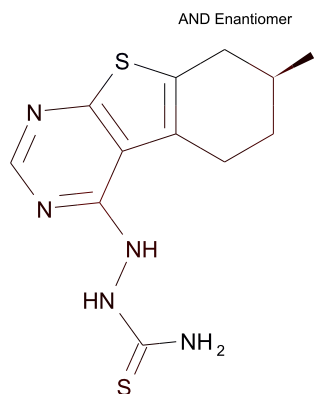

$C_{12}H_{15}N_5S_2$   
 Molecular Weight: 293.411  
 ALogP: 3.209  
 Rotatable Bonds: 3  
 Acceptors: 4  
 Donors: 3

### Model Prediction

**Prediction: Carcinogen**

Probability: 0.415

Enrichment: 1.29

Bayesian Score: 4.8

Mahalanobis Distance: 12.2

Mahalanobis Distance p-value: 0.00594

Prediction: Positive if the Bayesian score is above the estimated best cutoff value from minimizing the false positive and false negative rate.

Probability: The estimated probability that the sample is in the positive category. This assumes that the Bayesian score follows a normal distribution and is different from the prediction using a cutoff.

Enrichment: An estimate of enrichment, that is, the increased likelihood (versus random) of this sample being in the category.

Bayesian Score: The standard Laplacian-modified Bayesian score.

Mahalanobis Distance: The Mahalanobis distance (MD) is the distance to the center of the training data. The larger the MD, the less trustworthy the prediction.

Mahalanobis Distance p-value: The p-value gives the fraction of training data with an MD greater than or equal to the one for the given sample, assuming normally distributed data. The smaller the p-value, the less trustworthy the prediction. For highly non-normal X properties (e.g., fingerprints), the MD p-value is wildly inaccurate.

### Structural Similar Compounds

| Name               | Furoseamide                                                         | Phenazopyridine                                                     | Niclosamide                                                         |
|--------------------|---------------------------------------------------------------------|---------------------------------------------------------------------|---------------------------------------------------------------------|
| Structure          |                                                                     |                                                                     |                                                                     |
| Actual Endpoint    | Carcinogen                                                          | Carcinogen                                                          | Non-Carcinogen                                                      |
| Predicted Endpoint | Carcinogen                                                          | Carcinogen                                                          | Non-Carcinogen                                                      |
| Distance           | 0.715                                                               | 0.729                                                               | 0.734                                                               |
| Reference          | US FDA (Centre for Drug Eval.& Res./Off. Testing & Res.) Sept. 1997 | US FDA (Centre for Drug Eval.& Res./Off. Testing & Res.) Sept. 1997 | US FDA (Centre for Drug Eval.& Res./Off. Testing & Res.) Sept. 1997 |

### Model Applicability

Unknown features are fingerprint features in the query molecule, but not found or appearing too infrequently in the training set.

1. All properties and OPS components are within expected ranges.
2. Unknown ECFP\_2 feature: -1597579789: [\*]:n:[c]1:s:[\*]:[\*]:[c]:1:[\*]
3. Unknown ECFP\_2 feature: -571028867: [\*]NC(=S)N

### Feature Contribution

#### Top features for positive contribution

| Fingerprint | Bit/Smiles | Feature Structure | Score | Carcinogen in training set |
|-------------|------------|-------------------|-------|----------------------------|
| ECFP_6      | -845108448 | <br>[*]=S         | 0.675 | 4 out of 5                 |

|                                               |                   |                                                                                                                                                                         |              |                                   |
|-----------------------------------------------|-------------------|-------------------------------------------------------------------------------------------------------------------------------------------------------------------------|--------------|-----------------------------------|
| ECFP_6                                        | 51876938          | <p>AND Enantiomer</p> 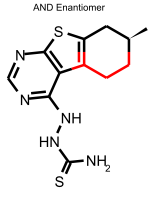 <p>[*]CC[c](:[*]):[*]</p>                                     | 0.473        | 16 out of 31                      |
| ECFP_6                                        | -1661653144       | <p>AND Enantiomer</p>  <p>[*][c](:[*]):[c]1:[c]<br/>([*]):[*]:[*]:[c]:1:<br/>[*]</p> | 0.442        | 2 out of 3                        |
| <b>Top Features for negative contribution</b> |                   |                                                                                                                                                                         |              |                                   |
| <b>Fingerprint</b>                            | <b>Bit/Smiles</b> | <b>Feature Structure</b>                                                                                                                                                | <b>Score</b> | <b>Carcinogen in training set</b> |
| ECFP_6                                        | -1672647522       | <p>AND Enantiomer</p>  <p>[*]C[c]1:s:[*]:[*]:[c]<br/>]:1[*]</p>                      | -0.27        | 0 out of 1                        |
| ECFP_6                                        | -1660340418       | <p>AND Enantiomer</p>  <p>[*]C[c]1:[c]([*]):[*]<br/>:[*]:[c]:1:[*]</p>              | -0.232       | 2 out of 9                        |
| ECFP_6                                        | 85262808          | <p>AND Enantiomer</p>  <p>[*][c]1:[*]:[*]:[c](:<br/>[*]):s:1</p>                   | -0.112       | 1 out of 4                        |

9a

## TOPKAT\_Mouse\_Female\_FDA\_None\_vs\_Carcinogen

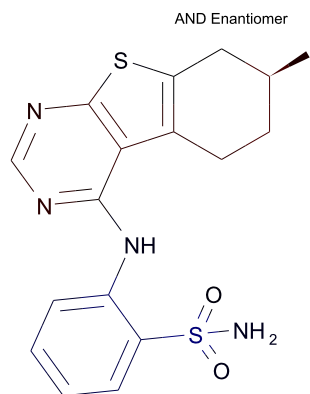C<sub>17</sub>H<sub>18</sub>N<sub>4</sub>O<sub>2</sub>S<sub>2</sub>

Molecular Weight: 374.48042

ALogP: 3.541

Rotatable Bonds: 3

Acceptors: 5

Donors: 2

**Model Prediction****Prediction: Carcinogen**

Probability: 0.249

Enrichment: 0.776

Bayesian Score: -0.764

Mahalanobis Distance: 11.5

Mahalanobis Distance p-value: 0.0367

Prediction: Positive if the Bayesian score is above the estimated best cutoff value from minimizing the false positive and false negative rate.

Probability: The estimated probability that the sample is in the positive category. This assumes that the Bayesian score follows a normal distribution and is different from the prediction using a cutoff.

Enrichment: An estimate of enrichment, that is, the increased likelihood (versus random) of this sample being in the category.

Bayesian Score: The standard Laplacian-modified Bayesian score.

Mahalanobis Distance: The Mahalanobis distance (MD) is the distance to the center of the training data. The larger the MD, the less trustworthy the prediction.

Mahalanobis Distance p-value: The p-value gives the fraction of training data with an MD greater than or equal to the one for the given sample, assuming normally distributed data. The smaller the p-value, the less trustworthy the prediction. For highly non-normal X properties (e.g., fingerprints), the MD p-value is wildly inaccurate.

**Structural Similar Compounds**

| Name               | Indapamide                                                          | Metolazone                                                          | Niclosamide                                                         |
|--------------------|---------------------------------------------------------------------|---------------------------------------------------------------------|---------------------------------------------------------------------|
| Structure          |                                                                     |                                                                     |                                                                     |
| Actual Endpoint    | Non-Carcinogen                                                      | Non-Carcinogen                                                      | Non-Carcinogen                                                      |
| Predicted Endpoint | Non-Carcinogen                                                      | Non-Carcinogen                                                      | Non-Carcinogen                                                      |
| Distance           | 0.579                                                               | 0.616                                                               | 0.616                                                               |
| Reference          | US FDA (Centre for Drug Eval.& Res./Off. Testing & Res.) Sept. 1997 | US FDA (Centre for Drug Eval.& Res./Off. Testing & Res.) Sept. 1997 | US FDA (Centre for Drug Eval.& Res./Off. Testing & Res.) Sept. 1997 |

**Model Applicability**

Unknown features are fingerprint features in the query molecule, but not found or appearing too infrequently in the training set.

1. All properties and OPS components are within expected ranges.
2. Unknown ECFP\_2 feature: -1597579789: [\*]:n:[c]1:s:[\*]:[\*]:[c]:1:[\*]

**Feature Contribution****Top features for positive contribution**

| Fingerprint | Bit/Smiles | Feature Structure                               | Score | Carcinogen in training set |
|-------------|------------|-------------------------------------------------|-------|----------------------------|
| ECFP_6      | 51876938   | <p>AND Enantiomer</p> <p>[*]CC[c](:[*]):[*]</p> | 0.473 | 16 out of 31               |

|                                               |                   |                                                                                                                                                                                 |              |                                   |
|-----------------------------------------------|-------------------|---------------------------------------------------------------------------------------------------------------------------------------------------------------------------------|--------------|-----------------------------------|
| ECFP_6                                        | -1661653144       | <p>AND Enantiomer</p> 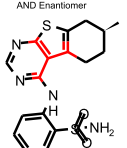 <p>[*][c](:[*]):[c]1:[c]<br/>([*]):[*]:[*]:[c]:1:<br/>[*]</p>         | 0.442        | 2 out of 3                        |
| ECFP_6                                        | -1448786963       | <p>AND Enantiomer</p>  <p>[*][c]1:[*]:[c](:[*])<br/>:n:[cH]:n:1</p>                          | 0.424        | 1 out of 1                        |
| <b>Top Features for negative contribution</b> |                   |                                                                                                                                                                                 |              |                                   |
| <b>Fingerprint</b>                            | <b>Bit/Smiles</b> | <b>Feature Structure</b>                                                                                                                                                        | <b>Score</b> | <b>Carcinogen in training set</b> |
| ECFP_6                                        | -1242906247       | <p>AND Enantiomer</p>  <p>[*]:[c](:[*])N[c](:[*]<br/>):[*]</p>                               | -0.482       | 0 out of 2                        |
| ECFP_6                                        | 1634465935        | <p>AND Enantiomer</p>  <p>[*][c]1:[*]:[cH]:[cH]<br/>:[cH]:[c]:1S(=[*])(=<br/>[*])[*]</p>    | -0.27        | 0 out of 1                        |
| ECFP_6                                        | -1114960102       | <p>AND Enantiomer</p>  <p>[*][c]1:[cH]:[cH]:[cH]<br/>:[cH]:[c]:1S(=[*])(=<br/>=[*])[*]</p> | -0.27        | 0 out of 1                        |



9b

## TOPKAT\_Mouse\_Female\_FDA\_None\_vs\_Carcinogen

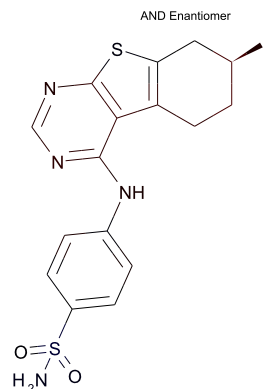C<sub>17</sub>H<sub>18</sub>N<sub>4</sub>O<sub>2</sub>S<sub>2</sub>

Molecular Weight: 374.48042

ALogP: 3.541

Rotatable Bonds: 3

Acceptors: 5

Donors: 2

**Model Prediction****Prediction: Carcinogen**

Probability: 0.286

Enrichment: 0.893

Bayesian Score: 1.05

Mahalanobis Distance: 12.1

Mahalanobis Distance p-value: 0.00933

Prediction: Positive if the Bayesian score is above the estimated best cutoff value from minimizing the false positive and false negative rate.

Probability: The estimated probability that the sample is in the positive category. This assumes that the Bayesian score follows a normal distribution and is different from the prediction using a cutoff.

Enrichment: An estimate of enrichment, that is, the increased likelihood (versus random) of this sample being in the category.

Bayesian Score: The standard Laplacian-modified Bayesian score.

Mahalanobis Distance: The Mahalanobis distance (MD) is the distance to the center of the training data. The larger the MD, the less trustworthy the prediction.

Mahalanobis Distance p-value: The p-value gives the fraction of training data with an MD greater than or equal to the one for the given sample, assuming normally distributed data. The smaller the p-value, the less trustworthy the prediction. For highly non-normal X properties (e.g., fingerprints), the MD p-value is wildly inaccurate.

**Structural Similar Compounds**

| Name               | Indapamide                                                          | Niclosamide                                                         | Metolazone                                                          |
|--------------------|---------------------------------------------------------------------|---------------------------------------------------------------------|---------------------------------------------------------------------|
| Structure          |                                                                     |                                                                     |                                                                     |
| Actual Endpoint    | Non-Carcinogen                                                      | Non-Carcinogen                                                      | Non-Carcinogen                                                      |
| Predicted Endpoint | Non-Carcinogen                                                      | Non-Carcinogen                                                      | Non-Carcinogen                                                      |
| Distance           | 0.596                                                               | 0.620                                                               | 0.633                                                               |
| Reference          | US FDA (Centre for Drug Eval.& Res./Off. Testing & Res.) Sept. 1997 | US FDA (Centre for Drug Eval.& Res./Off. Testing & Res.) Sept. 1997 | US FDA (Centre for Drug Eval.& Res./Off. Testing & Res.) Sept. 1997 |

**Model Applicability**

Unknown features are fingerprint features in the query molecule, but not found or appearing too infrequently in the training set.

1. All properties and OPS components are within expected ranges.
2. Unknown ECFP\_2 feature: -1597579789: [\*]:n:[c]1:s:[\*]:[\*]:[c]:1:[\*]

**Feature Contribution****Top features for positive contribution**

| Fingerprint | Bit/Smiles | Feature Structure                                    | Score | Carcinogen in training set |
|-------------|------------|------------------------------------------------------|-------|----------------------------|
| ECFP_6      | 51876938   | <br>AND Enantiomer<br><chem>[*]CC(c)([*]):[*]</chem> | 0.473 | 16 out of 31               |

|                                               |                   |                                                                                                                                                                                |              |                                   |
|-----------------------------------------------|-------------------|--------------------------------------------------------------------------------------------------------------------------------------------------------------------------------|--------------|-----------------------------------|
| ECFP_6                                        | -1661653144       | <p>AND Enantiomer</p> 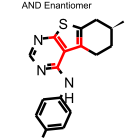<br><chem>[*][c]([*])[c]1:[c]<br/>([*]):[*]:[*]:[c]:1:<br/>[*]</chem> | 0.442        | 2 out of 3                        |
| ECFP_6                                        | 1049768340        | <p>AND Enantiomer</p> <br><chem>[*]N[c](:n:[*]):[c](:<br/>[*]):[*]</chem>                   | 0.424        | 1 out of 1                        |
| <b>Top Features for negative contribution</b> |                   |                                                                                                                                                                                |              |                                   |
| <b>Fingerprint</b>                            | <b>Bit/Smiles</b> | <b>Feature Structure</b>                                                                                                                                                       | <b>Score</b> | <b>Carcinogen in training set</b> |
| ECFP_6                                        | -1242906247       | <p>AND Enantiomer</p> <br><chem>[*]:[c](:[*])N[c](:[*]<br/>):[*]</chem>                     | -0.482       | 0 out of 2                        |
| ECFP_6                                        | -1672647522       | <p>AND Enantiomer</p> <br><chem>[*]C[c]1:s:[*]:[*]:[c]<br/>:1[*]</chem>                    | -0.27        | 0 out of 1                        |
| ECFP_6                                        | -797085356        | <p>AND Enantiomer</p> <br><chem>[*]S(=[*])(=[*])[*]</chem>                                | -0.263       | 5 out of 22                       |

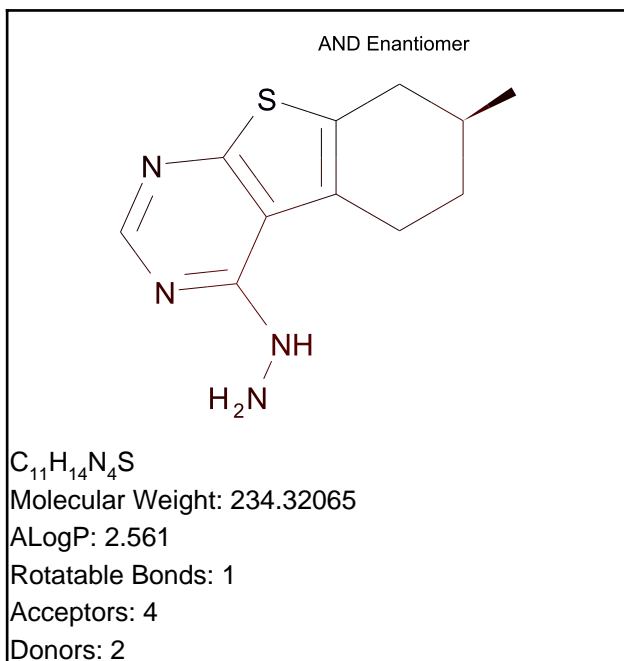

### Model Prediction

**Prediction: Carcinogen**

Probability: 0.407

Enrichment: 1.27

Bayesian Score: 4.63

Mahalanobis Distance: 11.5

Mahalanobis Distance p-value: 0.0391

Prediction: Positive if the Bayesian score is above the estimated best cutoff value from minimizing the false positive and false negative rate.

Probability: The estimated probability that the sample is in the positive category. This assumes that the Bayesian score follows a normal distribution and is different from the prediction using a cutoff.

Enrichment: An estimate of enrichment, that is, the increased likelihood (versus random) of this sample being in the category.

Bayesian Score: The standard Laplacian-modified Bayesian score.

Mahalanobis Distance: The Mahalanobis distance (MD) is the distance to the center of the training data. The larger the MD, the less trustworthy the prediction.

Mahalanobis Distance p-value: The p-value gives the fraction of training data with an MD greater than or equal to the one for the given sample, assuming normally distributed data. The smaller the p-value, the less trustworthy the prediction. For highly non-normal X properties (e.g., fingerprints), the MD p-value is wildly inaccurate.

### Structural Similar Compounds

| Name               | Lamotrigine                                                                         | Phenazopyridine                                                                     | Dapsone                                                                             |
|--------------------|-------------------------------------------------------------------------------------|-------------------------------------------------------------------------------------|-------------------------------------------------------------------------------------|
| Structure          | 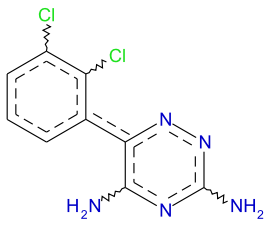 |  |  |
| Actual Endpoint    | Non-Carcinogen                                                                      | Carcinogen                                                                          | Non-Carcinogen                                                                      |
| Predicted Endpoint | Non-Carcinogen                                                                      | Carcinogen                                                                          | Non-Carcinogen                                                                      |
| Distance           | 0.571                                                                               | 0.586                                                                               | 0.601                                                                               |
| Reference          | US FDA (Centre for Drug Eval.& Res./Off. Testing & Res.) Sept. 1997                 | US FDA (Centre for Drug Eval.& Res./Off. Testing & Res.) Sept. 1997                 | US FDA (Centre for Drug Eval.& Res./Off. Testing & Res.) Sept. 1997                 |

### Model Applicability

Unknown features are fingerprint features in the query molecule, but not found or appearing too infrequently in the training set.

- All properties and OPS components are within expected ranges.
- Unknown ECFP\_2 feature: -1597579789: [\*]:n:[c]1:s:[\*]:[\*]:[c]:1:[\*]

### Feature Contribution

#### Top features for positive contribution

| Fingerprint | Bit/Smiles | Feature Structure                                                                     | Score | Carcinogen in training set |
|-------------|------------|---------------------------------------------------------------------------------------|-------|----------------------------|
| ECFP_6      | -934039951 | 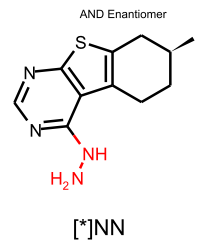 | 0.581 | 3 out of 4                 |

|                                               |                   |                                                                                                                                                                         |              |                                   |
|-----------------------------------------------|-------------------|-------------------------------------------------------------------------------------------------------------------------------------------------------------------------|--------------|-----------------------------------|
| ECFP_6                                        | 51876938          | <p>AND Enantiomer</p> 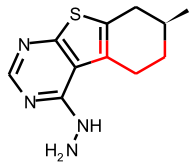 <p>[*]CC[c](:[*]):[*]</p>                                     | 0.473        | 16 out of 31                      |
| ECFP_6                                        | -1661653144       | <p>AND Enantiomer</p>  <p>[*][c](:[*]):[c]1:[c]<br/>([*]):[*]:[*]:[c]:1:<br/>[*]</p> | 0.442        | 2 out of 3                        |
| <b>Top Features for negative contribution</b> |                   |                                                                                                                                                                         |              |                                   |
| <b>Fingerprint</b>                            | <b>Bit/Smiles</b> | <b>Feature Structure</b>                                                                                                                                                | <b>Score</b> | <b>Carcinogen in training set</b> |
| ECFP_6                                        | -1672647522       | <p>AND Enantiomer</p>  <p>[*]C[c]1:s:[*]:[*]:[c]<br/>:1[*]</p>                       | -0.27        | 0 out of 1                        |
| ECFP_6                                        | -1660340418       | <p>AND Enantiomer</p>  <p>[*]C[c]1:[c]([*]):[*]<br/>:[*]:[c]:1[*]</p>              | -0.232       | 2 out of 9                        |
| ECFP_6                                        | 85262808          | <p>AND Enantiomer</p>  <p>[*][c]1:[*]:[*]:[c](:<br/>[*]):s:1</p>                   | -0.112       | 1 out of 4                        |

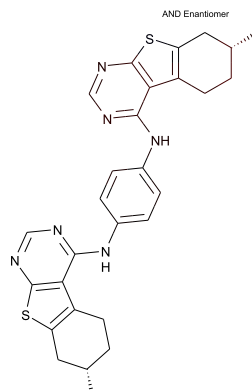

$C_{28}H_{28}N_6S_2$

Molecular Weight: 512.69212

ALogP: 7.842

Rotatable Bonds: 4

Acceptors: 6

Donors: 2

## Model Prediction

Prediction: **Carcinogen**

Probability: 0.318

Enrichment: 0.993

Bayesian Score: 2.21

Mahalanobis Distance: 13.1

Mahalanobis Distance p-value: 0.000434

Prediction: Positive if the Bayesian score is above the estimated best cutoff value from minimizing the false positive and false negative rate.

Probability: The estimated probability that the sample is in the positive category. This assumes that the Bayesian score follows a normal distribution and is different from the prediction using a cutoff.

Enrichment: An estimate of enrichment, that is, the increased likelihood (versus random) of this sample being in the category.

Bayesian Score: The standard Laplacian-modified Bayesian score.

Mahalanobis Distance: The Mahalanobis distance (MD) is the distance to the center of the training data. The larger the MD, the less trustworthy the prediction.

Mahalanobis Distance p-value: The p-value gives the fraction of training data with an MD greater than or equal to the one for the given sample, assuming normally distributed data. The smaller the p-value, the less trustworthy the prediction. For highly non-normal X properties (e.g., fingerprints), the MD p-value is wildly inaccurate.

## Structural Similar Compounds

| Name               | Fluticasone                                                         | Emetine                                                             | Bromocriptine                                                       |
|--------------------|---------------------------------------------------------------------|---------------------------------------------------------------------|---------------------------------------------------------------------|
| Structure          |                                                                     |                                                                     |                                                                     |
| Actual Endpoint    | Non-Carcinogen                                                      | Non-Carcinogen                                                      | Non-Carcinogen                                                      |
| Predicted Endpoint | Non-Carcinogen                                                      | Non-Carcinogen                                                      | Non-Carcinogen                                                      |
| Distance           | 0.878                                                               | 0.893                                                               | 0.907                                                               |
| Reference          | US FDA (Centre for Drug Eval.& Res./Off. Testing & Res.) Sept. 1997 | US FDA (Centre for Drug Eval.& Res./Off. Testing & Res.) Sept. 1997 | US FDA (Centre for Drug Eval.& Res./Off. Testing & Res.) Sept. 1997 |

## Model Applicability

Unknown features are fingerprint features in the query molecule, but not found or appearing too infrequently in the training set.

1. All properties and OPS components are within expected ranges.
2. Unknown ECFP\_2 feature: -1597579789: [\*]:n:[c]1:s:[\*]:[\*]:[c]:1:[\*]

## Feature Contribution

### Top features for positive contribution

| Fingerprint | Bit/Smiles | Feature Structure                  | Score | Carcinogen in training set |
|-------------|------------|------------------------------------|-------|----------------------------|
| ECFP_6      | 51876938   | <br><chem>[*]CC[c]([*]):[*]</chem> | 0.473 | 16 out of 31               |

|                                               |                   |                                                                                                                                                                         |              |                                   |
|-----------------------------------------------|-------------------|-------------------------------------------------------------------------------------------------------------------------------------------------------------------------|--------------|-----------------------------------|
| ECFP_6                                        | -1661653144       | <p>AND Enantiomer</p> 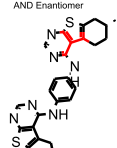 <p>[*][c](:[*]):[c]1:[c]<br/>([*]):[*]:[*]:[c]:1:<br/>[*]</p> | 0.442        | 2 out of 3                        |
| ECFP_6                                        | 553181281         | <p>AND Enantiomer</p>  <p>[*]C@@H1[*][c]2:[*]<br/>:[*]:e([*]):[c]:2<br/>CC1</p>      | 0.424        | 1 out of 1                        |
| <b>Top Features for negative contribution</b> |                   |                                                                                                                                                                         |              |                                   |
| <b>Fingerprint</b>                            | <b>Bit/Smiles</b> | <b>Feature Structure</b>                                                                                                                                                | <b>Score</b> | <b>Carcinogen in training set</b> |
| ECFP_6                                        | -1242906247       | <p>AND Enantiomer</p>  <p>[*]:[c](:[*])N[c](:[*]<br/>):[*]</p>                       | -0.482       | 0 out of 2                        |
| ECFP_6                                        | -1672647522       | <p>AND Enantiomer</p>  <p>[*]C[c]1:s:[*]:[*]:[c]<br/>:1[*]</p>                      | -0.27        | 0 out of 1                        |
| ECFP_6                                        | -1660340418       | <p>AND Enantiomer</p>  <p>[*]C[c]1:[c]([*]):[*]<br/>:[*]:[c]:1:[*]</p>             | -0.232       | 2 out of 9                        |

# Erlotinib

# TOPKAT\_Mouse\_Female\_FDA\_None\_vs\_Carcinogen

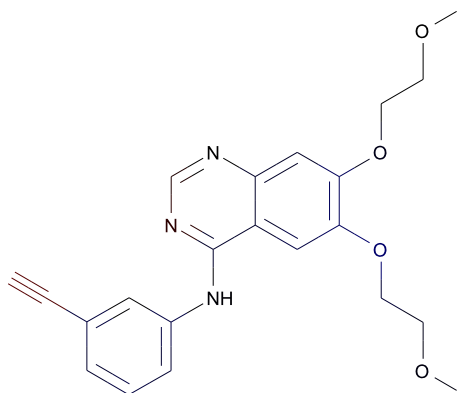

$C_{22}H_{23}N_3O_4$   
 Molecular Weight: 393.43572  
 ALogP: 4.309  
 Rotatable Bonds: 10  
 Acceptors: 7  
 Donors: 1

## Model Prediction

Prediction: Non-Carcinogen

Probability: 0.235

Enrichment: 0.733

Bayesian Score: -1.68

Mahalanobis Distance: 15.3

Mahalanobis Distance p-value: 7.99e-008

Prediction: Positive if the Bayesian score is above the estimated best cutoff value from minimizing the false positive and false negative rate.

Probability: The estimated probability that the sample is in the positive category. This assumes that the Bayesian score follows a normal distribution and is different from the prediction using a cutoff.

Enrichment: An estimate of enrichment, that is, the increased likelihood (versus random) of this sample being in the category.

Bayesian Score: The standard Laplacian-modified Bayesian score.

Mahalanobis Distance: The Mahalanobis distance (MD) is the distance to the center of the training data. The larger the MD, the less trustworthy the prediction.

Mahalanobis Distance p-value: The p-value gives the fraction of training data with an MD greater than or equal to the one for the given sample, assuming normally distributed data. The smaller the p-value, the less trustworthy the prediction. For highly non-normal X properties (e.g., fingerprints), the MD p-value is wildly inaccurate.

## Structural Similar Compounds

| Name               | Mycophenolate                                                       | Nicardipine                                                         | Nimodipine                                                          |
|--------------------|---------------------------------------------------------------------|---------------------------------------------------------------------|---------------------------------------------------------------------|
| Structure          |                                                                     |                                                                     |                                                                     |
| Actual Endpoint    | Non-Carcinogen                                                      | Non-Carcinogen                                                      | Non-Carcinogen                                                      |
| Predicted Endpoint | Non-Carcinogen                                                      | Non-Carcinogen                                                      | Non-Carcinogen                                                      |
| Distance           | 0.632                                                               | 0.664                                                               | 0.675                                                               |
| Reference          | US FDA (Centre for Drug Eval.& Res./Off. Testing & Res.) Sept. 1997 | US FDA (Centre for Drug Eval.& Res./Off. Testing & Res.) Sept. 1997 | US FDA (Centre for Drug Eval.& Res./Off. Testing & Res.) Sept. 1997 |

## Model Applicability

Unknown features are fingerprint features in the query molecule, but not found or appearing too infrequently in the training set.

1. All properties and OPS components are within expected ranges.
2. Unknown ECFP\_2 feature: -182178874: [\*]#C[c](:c:[\*]):c:[\*]
3. Unknown ECFP\_2 feature: 1139738044: [\*]:[c](:[\*])C#C

## Feature Contribution

### Top features for positive contribution

| Fingerprint | Bit/Smiles  | Feature Structure | Score | Carcinogen in training set |
|-------------|-------------|-------------------|-------|----------------------------|
| ECFP_6      | -1939823063 | <br>[*]#C         | 0.866 | 8 out of 9                 |

|                                               |                   |                                                                                                                                                  |              |                                   |
|-----------------------------------------------|-------------------|--------------------------------------------------------------------------------------------------------------------------------------------------|--------------|-----------------------------------|
| ECFP_6                                        | -1545539812       | 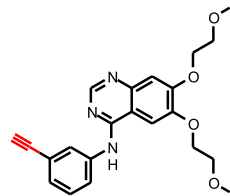<br>[*]C#C                                                     | 0.866        | 8 out of 9                        |
| ECFP_6                                        | -1114776580       | <br>[*]C#[*]                                                  | 0.755        | 11 out of 15                      |
| <b>Top Features for negative contribution</b> |                   |                                                                                                                                                  |              |                                   |
| <b>Fingerprint</b>                            | <b>Bit/Smiles</b> | <b>Feature Structure</b>                                                                                                                         | <b>Score</b> | <b>Carcinogen in training set</b> |
| ECFP_6                                        | 2007300961        | <br>[*][c]1:[*]:[c]([*]):<br>[cH]:[cH]:[cH]:1                 | -0.652       | 5 out of 34                       |
| ECFP_6                                        | -2063202154       | <br>[*]O[c]1:[cH]:[c](:n:<br>[*]):[c](:[*]):[*]:[<br>c]:1[*] | -0.482       | 0 out of 2                        |
| ECFP_6                                        | -1242906247       | <br>[*]:[c](:[*])N[c](:[*]<br>):[*]                         | -0.482       | 0 out of 2                        |



5a

TOPKAT\_Mouse\_Female\_FDA\_Single\_vs\_Multiple

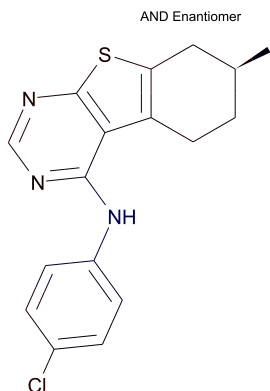C<sub>17</sub>H<sub>16</sub>ClN<sub>3</sub>S

Molecular Weight: 329.84704

ALogP: 5.5

Rotatable Bonds: 2

Acceptors: 3

Donors: 1

**Model Prediction****Prediction: Multiple-Carcinogen**

Probability: 0.415

Enrichment: 1.01

Bayesian Score: 0.333

Mahalanobis Distance: 15.5

Mahalanobis Distance p-value: 3.16e-007

Prediction: Positive if the Bayesian score is above the estimated best cutoff value from minimizing the false positive and false negative rate.

Probability: The estimated probability that the sample is in the positive category. This assumes that the Bayesian score follows a normal distribution and is different from the prediction using a cutoff.

Enrichment: An estimate of enrichment, that is, the increased likelihood (versus random) of this sample being in the category.

Bayesian Score: The standard Laplacian-modified Bayesian score.

Mahalanobis Distance: The Mahalanobis distance (MD) is the distance to the center of the training data. The larger the MD, the less trustworthy the prediction.

Mahalanobis Distance p-value: The p-value gives the fraction of training data with an MD greater than or equal to the one for the given sample, assuming normally distributed data. The smaller the p-value, the less trustworthy the prediction. For highly non-normal X properties (e.g., fingerprints), the MD p-value is wildly inaccurate.

**Structural Similar Compounds**

| Name               | Nafenopin                                                           | Levonorgestrel                                                      | Mestranol                                                           |
|--------------------|---------------------------------------------------------------------|---------------------------------------------------------------------|---------------------------------------------------------------------|
| Structure          |                                                                     |                                                                     |                                                                     |
| Actual Endpoint    | Single-Carcinogen                                                   | Single-Carcinogen                                                   | Multiple-Carcinogen                                                 |
| Predicted Endpoint | Single-Carcinogen                                                   | Single-Carcinogen                                                   | Multiple-Carcinogen                                                 |
| Distance           | 0.612                                                               | 0.641                                                               | 0.655                                                               |
| Reference          | US FDA (Centre for Drug Eval.& Res./Off. Testing & Res.) Sept. 1997 | US FDA (Centre for Drug Eval.& Res./Off. Testing & Res.) Sept. 1997 | US FDA (Centre for Drug Eval.& Res./Off. Testing & Res.) Sept. 1997 |

**Model Applicability**

Unknown features are fingerprint features in the query molecule, but not found or appearing too infrequently in the training set.

1. All properties and OPS components are within expected ranges.
2. Unknown ECFP<sub>2</sub> feature: -1672647522: [\*]C[c]1:s:[\*]:[\*]:[c]:1[\*]
3. Unknown ECFP<sub>2</sub> feature: -1597579789: [\*]:n:[c]1:s:[\*]:[\*]:[c]:1[\*]
4. Unknown ECFP<sub>2</sub> feature: -1242906247: [\*]:[c]([\*])N[c]([\*]):[\*]

**Feature Contribution****Top features for positive contribution**

| Fingerprint | Bit/Smiles | Feature Structure                                   | Score | Multiple-Carcinogen in training set |
|-------------|------------|-----------------------------------------------------|-------|-------------------------------------|
| ECFP_4      | 553181281  | <br><chem>*[C@@H]1[*]c2[*]:[*]c([*])c2[*]CC1</chem> | 0.351 | 1 out of 1                          |

|                                               |                   |                                                                                                                                                                           |              |                                            |
|-----------------------------------------------|-------------------|---------------------------------------------------------------------------------------------------------------------------------------------------------------------------|--------------|--------------------------------------------|
| ECFP_4                                        | -710237522        | <p>AND Enantiomer</p> 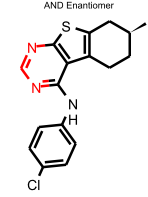 <p>[*]:n:[cH]:n:[*]</p>                                         | 0.351        | 1 out of 1                                 |
| ECFP_4                                        | 85262808          | <p>AND Enantiomer</p>  <p>[*][c]1:[*]:[*]:[c](:<br/>[*]):s:1</p>                       | 0.351        | 1 out of 1                                 |
| <b>Top Features for negative contribution</b> |                   |                                                                                                                                                                           |              |                                            |
| <b>Fingerprint</b>                            | <b>Bit/Smiles</b> | <b>Feature Structure</b>                                                                                                                                                  | <b>Score</b> | <b>Multiple-Carcinogen in training set</b> |
| ECFP_4                                        | 888054369         | <p>AND Enantiomer</p>  <p>[*]N[c]1:[cH]:[*]:[c]<br/>([*]):[cH]:[cH]:1</p>              | -0.8         | 0 out of 3                                 |
| ECFP_4                                        | -1661653144       | <p>AND Enantiomer</p>  <p>[*][c](-[*]):[c]1:[c]<br/>([*]):[*]:[*]:[c]:1:<br/>[*]</p> | -0.597       | 0 out of 2                                 |
| ECFP_4                                        | -1897341097       | <p>AND Enantiomer</p>  <p>[*]N[*]</p>                                                | -0.356       | 8 out of 29                                |



5b

TOPKAT\_Mouse\_Female\_FDA\_Single\_vs\_Multiple

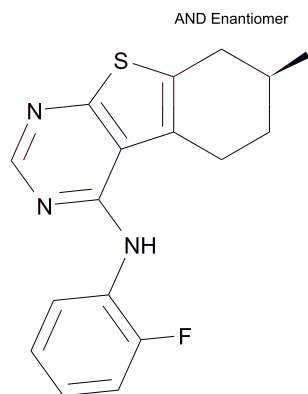C<sub>17</sub>H<sub>16</sub>FN<sub>3</sub>S

Molecular Weight: 313.39244

ALogP: 5.041

Rotatable Bonds: 2

Acceptors: 3

Donors: 1

**Model Prediction****Prediction: Multiple-Carcinogen**

Probability: 0.472

Enrichment: 1.15

Bayesian Score: 1.6

Mahalanobis Distance: 13.5

Mahalanobis Distance p-value: 1.91e-005

Prediction: Positive if the Bayesian score is above the estimated best cutoff value from minimizing the false positive and false negative rate.

Probability: The estimated probability that the sample is in the positive category. This assumes that the Bayesian score follows a normal distribution and is different from the prediction using a cutoff.

Enrichment: An estimate of enrichment, that is, the increased likelihood (versus random) of this sample being in the category.

Bayesian Score: The standard Laplacian-modified Bayesian score.

Mahalanobis Distance: The Mahalanobis distance (MD) is the distance to the center of the training data. The larger the MD, the less trustworthy the prediction.

Mahalanobis Distance p-value: The p-value gives the fraction of training data with an MD greater than or equal to the one for the given sample, assuming normally distributed data. The smaller the p-value, the less trustworthy the prediction. For highly non-normal X properties (e.g., fingerprints), the MD p-value is wildly inaccurate.

**Structural Similar Compounds**

| Name               | Nafenopin                                                           | Levonorgestrel                                                      | Pergolide                                                           |
|--------------------|---------------------------------------------------------------------|---------------------------------------------------------------------|---------------------------------------------------------------------|
| Structure          |                                                                     |                                                                     |                                                                     |
| Actual Endpoint    | Single-Carcinogen                                                   | Single-Carcinogen                                                   | Single-Carcinogen                                                   |
| Predicted Endpoint | Single-Carcinogen                                                   | Single-Carcinogen                                                   | Single-Carcinogen                                                   |
| Distance           | 0.593                                                               | 0.636                                                               | 0.655                                                               |
| Reference          | US FDA (Centre for Drug Eval.& Res./Off. Testing & Res.) Sept. 1997 | US FDA (Centre for Drug Eval.& Res./Off. Testing & Res.) Sept. 1997 | US FDA (Centre for Drug Eval.& Res./Off. Testing & Res.) Sept. 1997 |

**Model Applicability**

Unknown features are fingerprint features in the query molecule, but not found or appearing too infrequently in the training set.

1. All properties and OPS components are within expected ranges.
2. Unknown ECFP<sub>2</sub> feature: -1672647522: [\*]C[c]1:s:[\*]:[\*]:[c]:1[\*]
3. Unknown ECFP<sub>2</sub> feature: -1597579789: [\*]:n:[c]1:s:[\*]:[\*]:[c]:1[\*]
4. Unknown ECFP<sub>2</sub> feature: -1242906247: [\*]:[c](:[\*])N[c](:[\*]):[\*]

**Feature Contribution****Top features for positive contribution**

| Fingerprint       | Bit/Smiles | Feature Structure                           | Score | Multiple-Carcinogen in training set |
|-------------------|------------|---------------------------------------------|-------|-------------------------------------|
| ECFP <sub>4</sub> | 220735655  | <p>AND Enantiomer</p> <p>[*]:[c](:[*])F</p> | 0.497 | 4 out of 5                          |

|                                               |                   |                                                                                                                                                                         |              |                                            |
|-----------------------------------------------|-------------------|-------------------------------------------------------------------------------------------------------------------------------------------------------------------------|--------------|--------------------------------------------|
| ECFP_4                                        | -710237522        | <p>AND Enantiomer</p> 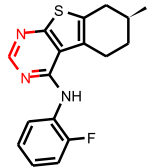 <p>[*]:n:[cH]:n:[*]</p>                                       | 0.351        | 1 out of 1                                 |
| ECFP_4                                        | 85262808          | <p>AND Enantiomer</p>  <p>[*][c]1:[*]:[*]:[c]:<br/>[*]:s:1</p>                       | 0.351        | 1 out of 1                                 |
| <b>Top Features for negative contribution</b> |                   |                                                                                                                                                                         |              |                                            |
| <b>Fingerprint</b>                            | <b>Bit/Smiles</b> | <b>Feature Structure</b>                                                                                                                                                | <b>Score</b> | <b>Multiple-Carcinogen in training set</b> |
| ECFP_4                                        | -1661653144       | <p>AND Enantiomer</p>  <p>[*][c](:[*]):[c]1:[c]<br/>([*]):[*]:[*]:[c]:1:<br/>[*]</p> | -0.597       | 0 out of 2                                 |
| ECFP_4                                        | -1897341097       | <p>AND Enantiomer</p>  <p>[*]N[*]</p>                                              | -0.356       | 8 out of 29                                |
| ECFP_4                                        | 292958156         | <p>AND Enantiomer</p>  <p>[*]CC(C)C[*]</p>                                         | -0.342       | 0 out of 1                                 |



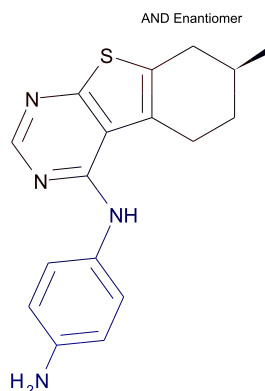

$C_{17}H_{18}N_4S$

Molecular Weight: 310.41662

ALogP: 4.089

Rotatable Bonds: 2

Acceptors: 4

Donors: 2

## Model Prediction

Prediction: Single-Carcinogen

Probability: 0.305

Enrichment: 0.744

Bayesian Score: -2.95

Mahalanobis Distance: 15.9

Mahalanobis Distance p-value: 1.43e-007

Prediction: Positive if the Bayesian score is above the estimated best cutoff value from minimizing the false positive and false negative rate.

Probability: The estimated probability that the sample is in the positive category. This assumes that the Bayesian score follows a normal distribution and is different from the prediction using a cutoff.

Enrichment: An estimate of enrichment, that is, the increased likelihood (versus random) of this sample being in the category.

Bayesian Score: The standard Laplacian-modified Bayesian score.

Mahalanobis Distance: The Mahalanobis distance (MD) is the distance to the center of the training data. The larger the MD, the less trustworthy the prediction.

Mahalanobis Distance p-value: The p-value gives the fraction of training data with an MD greater than or equal to the one for the given sample, assuming normally distributed data. The smaller the p-value, the less trustworthy the prediction. For highly non-normal X properties (e.g., fingerprints), the MD p-value is wildly inaccurate.

## Structural Similar Compounds

| Name               | Phenolphthalein                                                     | Oxazepam                                                            | Phenazopyridine                                                     |
|--------------------|---------------------------------------------------------------------|---------------------------------------------------------------------|---------------------------------------------------------------------|
| Structure          |                                                                     |                                                                     |                                                                     |
| Actual Endpoint    | Multiple-Carcinogen                                                 | Multiple-Carcinogen                                                 | Single-Carcinogen                                                   |
| Predicted Endpoint | Multiple-Carcinogen                                                 | Multiple-Carcinogen                                                 | Single-Carcinogen                                                   |
| Distance           | 0.578                                                               | 0.655                                                               | 0.715                                                               |
| Reference          | US FDA (Centre for Drug Eval.& Res./Off. Testing & Res.) Sept. 1997 | US FDA (Centre for Drug Eval.& Res./Off. Testing & Res.) Sept. 1997 | US FDA (Centre for Drug Eval.& Res./Off. Testing & Res.) Sept. 1997 |

## Model Applicability

Unknown features are fingerprint features in the query molecule, but not found or appearing too infrequently in the training set.

1. All properties and OPS components are within expected ranges.
2. Unknown ECFP\_2 feature: -1672647522: [\*]C[c]1:s:[\*]:[\*]:[c]:1[\*]
3. Unknown ECFP\_2 feature: -1597579789: [\*]:n:[c]1:s:[\*]:[\*]:[c]:1[\*]
4. Unknown ECFP\_2 feature: -1242906247: [\*]:[c](:[\*])N[c](:[\*]):[\*]

## Feature Contribution

### Top features for positive contribution

| Fingerprint | Bit/Smiles | Feature Structure                                                            | Score | Multiple-Carcinogen in training set |
|-------------|------------|------------------------------------------------------------------------------|-------|-------------------------------------|
| ECFP_4      | 553181281  | <p>AND Enantiomer</p> <p><chem>*[C@@H]1[*]c2[*]:[*]c([*])c2[*]CC1</chem></p> | 0.351 | 1 out of 1                          |

|                                               |                   |                                                                                                                                                                          |              |                                            |
|-----------------------------------------------|-------------------|--------------------------------------------------------------------------------------------------------------------------------------------------------------------------|--------------|--------------------------------------------|
| ECFP_4                                        | -710237522        | <p>AND Enantiomer</p> 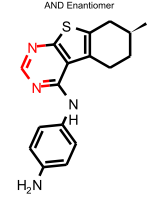 <p>[*]:n:[cH]:n:[*]</p>                                        | 0.351        | 1 out of 1                                 |
| ECFP_4                                        | 85262808          | <p>AND Enantiomer</p>  <p>[*][c]1:[*]:[*]:[c](<br/>[*]):s:1</p>                       | 0.351        | 1 out of 1                                 |
| <b>Top Features for negative contribution</b> |                   |                                                                                                                                                                          |              |                                            |
| <b>Fingerprint</b>                            | <b>Bit/Smiles</b> | <b>Feature Structure</b>                                                                                                                                                 | <b>Score</b> | <b>Multiple-Carcinogen in training set</b> |
| ECFP_4                                        | 888054369         | <p>AND Enantiomer</p>  <p>[*]N[c]1:[cH]:[*]:[c]<br/>([*]):[cH]:[cH]:1</p>             | -0.8         | 0 out of 3                                 |
| ECFP_4                                        | 924664308         | <p>AND Enantiomer</p>  <p>[*][c]1:[*]:[cH]:[c]<br/>(N):[cH]:[cH]:1</p>              | -0.597       | 0 out of 2                                 |
| ECFP_4                                        | -1661653144       | <p>AND Enantiomer</p>  <p>[*][c]([*]):[c]1:[c]<br/>([*]):[*]:[*]:[c]:1:<br/>[*]</p> | -0.597       | 0 out of 2                                 |





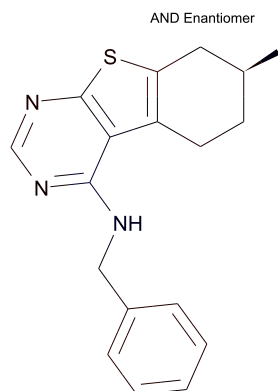

$C_{18}H_{19}N_3S$

Molecular Weight: 309.42856

ALogP: 4.678

Rotatable Bonds: 3

Acceptors: 3

Donors: 1

## Model Prediction

Prediction: Multiple-Carcinogen

Probability: 0.439

Enrichment: 1.07

Bayesian Score: 0.904

Mahalanobis Distance: 13.8

Mahalanobis Distance p-value: 1.14e-005

Prediction: Positive if the Bayesian score is above the estimated best cutoff value from minimizing the false positive and false negative rate.

Probability: The estimated probability that the sample is in the positive category. This assumes that the Bayesian score follows a normal distribution and is different from the prediction using a cutoff.

Enrichment: An estimate of enrichment, that is, the increased likelihood (versus random) of this sample being in the category.

Bayesian Score: The standard Laplacian-modified Bayesian score.

Mahalanobis Distance: The Mahalanobis distance (MD) is the distance to the center of the training data. The larger the MD, the less trustworthy the prediction.

Mahalanobis Distance p-value: The p-value gives the fraction of training data with an MD greater than or equal to the one for the given sample, assuming normally distributed data. The smaller the p-value, the less trustworthy the prediction. For highly non-normal X properties (e.g., fingerprints), the MD p-value is wildly inaccurate.

## Structural Similar Compounds

| Name               | Nafenopin                                                           | Pergolide                                                           | Levonorgestrel                                                      |
|--------------------|---------------------------------------------------------------------|---------------------------------------------------------------------|---------------------------------------------------------------------|
| Structure          |                                                                     |                                                                     |                                                                     |
| Actual Endpoint    | Single-Carcinogen                                                   | Single-Carcinogen                                                   | Single-Carcinogen                                                   |
| Predicted Endpoint | Single-Carcinogen                                                   | Single-Carcinogen                                                   | Single-Carcinogen                                                   |
| Distance           | 0.547                                                               | 0.602                                                               | 0.651                                                               |
| Reference          | US FDA (Centre for Drug Eval.& Res./Off. Testing & Res.) Sept. 1997 | US FDA (Centre for Drug Eval.& Res./Off. Testing & Res.) Sept. 1997 | US FDA (Centre for Drug Eval.& Res./Off. Testing & Res.) Sept. 1997 |

## Model Applicability

Unknown features are fingerprint features in the query molecule, but not found or appearing too infrequently in the training set.

1. All properties and OPS components are within expected ranges.
2. Unknown ECFP\_2 feature: -1672647522: [\*]C[c]1:s:[\*]:[\*]:[c]:1[\*]
3. Unknown ECFP\_2 feature: -1597579789: [\*]:n:[c]1:s:[\*]:[\*]:[c]:1[\*]

## Feature Contribution

### Top features for positive contribution

| Fingerprint | Bit/Smiles | Feature Structure                       | Score | Multiple-Carcinogen in training set |
|-------------|------------|-----------------------------------------|-------|-------------------------------------|
| ECFP_4      | 110318898  | <br>[*]NC[c]1:[cH]:[cH]:[*]:[cH]:[cH]:1 | 0.351 | 1 out of 1                          |

|                                               |                   |                                                                                                                                                                         |              |                                            |
|-----------------------------------------------|-------------------|-------------------------------------------------------------------------------------------------------------------------------------------------------------------------|--------------|--------------------------------------------|
| ECFP_4                                        | -710237522        | <p>AND Enantiomer</p> 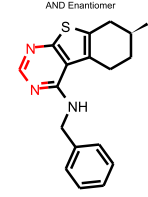 <p>[*]:n:[cH]:n:[*]</p>                                       | 0.351        | 1 out of 1                                 |
| ECFP_4                                        | 85262808          | <p>AND Enantiomer</p>  <p>[*][c]1:[*]:[*]:[c](:<br/>[*]):s:1</p>                     | 0.351        | 1 out of 1                                 |
| <b>Top Features for negative contribution</b> |                   |                                                                                                                                                                         |              |                                            |
| <b>Fingerprint</b>                            | <b>Bit/Smiles</b> | <b>Feature Structure</b>                                                                                                                                                | <b>Score</b> | <b>Multiple-Carcinogen in training set</b> |
| ECFP_4                                        | -1661653144       | <p>AND Enantiomer</p>  <p>[*][c](:[*]):[c]1:[c]<br/>([*]):[*]:[*]:[c]:1:<br/>[*]</p> | -0.597       | 0 out of 2                                 |
| ECFP_4                                        | -1897341097       | <p>AND Enantiomer</p>  <p>[*]N[*]</p>                                              | -0.356       | 8 out of 29                                |
| ECFP_4                                        | 292958156         | <p>AND Enantiomer</p>  <p>[*]CC(C)C[*]</p>                                         | -0.342       | 0 out of 1                                 |



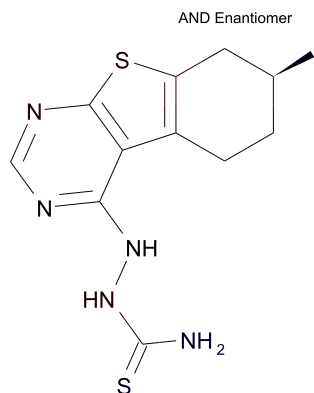

$C_{12}H_{15}N_5S_2$

Molecular Weight: 293.411

ALogP: 3.209

Rotatable Bonds: 3

Acceptors: 4

Donors: 3

## Model Prediction

Prediction: Multiple-Carcinogen

Probability: 0.338

Enrichment: 0.825

Bayesian Score: -1.78

Mahalanobis Distance: 14.7

Mahalanobis Distance p-value: 1.82e-006

Prediction: Positive if the Bayesian score is above the estimated best cutoff value from minimizing the false positive and false negative rate.

Probability: The estimated probability that the sample is in the positive category. This assumes that the Bayesian score follows a normal distribution and is different from the prediction using a cutoff.

Enrichment: An estimate of enrichment, that is, the increased likelihood (versus random) of this sample being in the category. Bayesian Score: The standard Laplacian-modified Bayesian score.

Mahalanobis Distance: The Mahalanobis distance (MD) is the distance to the center of the training data. The larger the MD, the less trustworthy the prediction.

Mahalanobis Distance p-value: The p-value gives the fraction of training data with an MD greater than or equal to the one for the given sample, assuming normally distributed data. The smaller the p-value, the less trustworthy the prediction. For highly non-normal X properties (e.g., fingerprints), the MD p-value is wildly inaccurate.

## Structural Similar Compounds

| Name               | Furoseamide                                                         | Phenazopyridine                                                     | Guanabenz                                                           |
|--------------------|---------------------------------------------------------------------|---------------------------------------------------------------------|---------------------------------------------------------------------|
| Structure          |                                                                     |                                                                     |                                                                     |
| Actual Endpoint    | Single-Carcinogen                                                   | Single-Carcinogen                                                   | Single-Carcinogen                                                   |
| Predicted Endpoint | Single-Carcinogen                                                   | Single-Carcinogen                                                   | Single-Carcinogen                                                   |
| Distance           | 0.708                                                               | 0.744                                                               | 0.758                                                               |
| Reference          | US FDA (Centre for Drug Eval.& Res./Off. Testing & Res.) Sept. 1997 | US FDA (Centre for Drug Eval.& Res./Off. Testing & Res.) Sept. 1997 | US FDA (Centre for Drug Eval.& Res./Off. Testing & Res.) Sept. 1997 |

## Model Applicability

Unknown features are fingerprint features in the query molecule, but not found or appearing too infrequently in the training set.

1. All properties and OPS components are within expected ranges.
2. Unknown ECFP\_2 feature: -1672647522: [\*]C[c]1:s:[\*]:[\*]:[c]:1[\*]
3. Unknown ECFP\_2 feature: -1597579789: [\*]:n:[c]1:s:[\*]:[\*]:[c]:1[\*]
4. Unknown ECFP\_2 feature: -571028867: [\*]NC(=S)N

## Feature Contribution

### Top features for positive contribution

| Fingerprint | Bit/Smiles | Feature Structure      | Score | Multiple-Carcinogen in training set |
|-------------|------------|------------------------|-------|-------------------------------------|
| ECFP_4      | 1635339976 | <p>[*]NNC(=[*])[*]</p> | 0.351 | 1 out of 1                          |

|                                               |                   |                                                                                                                                                                       |              |                                            |
|-----------------------------------------------|-------------------|-----------------------------------------------------------------------------------------------------------------------------------------------------------------------|--------------|--------------------------------------------|
| ECFP_4                                        | 553181281         | <p>AND Enantiomer</p> 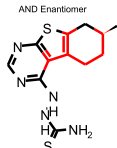 <p>[*]C@[H]1[*]c2[*]<br/>:[*]c([*])c:2<br/>CC1</p>          | 0.351        | 1 out of 1                                 |
| ECFP_4                                        | -1448786963       | <p>AND Enantiomer</p>  <p>[*]c1:[*]:c(:[*])<br/>:n:[cH]:n:1</p>                    | 0.351        | 1 out of 1                                 |
| <b>Top Features for negative contribution</b> |                   |                                                                                                                                                                       |              |                                            |
| <b>Fingerprint</b>                            | <b>Bit/Smiles</b> | <b>Feature Structure</b>                                                                                                                                              | <b>Score</b> | <b>Multiple-Carcinogen in training set</b> |
| ECFP_4                                        | -1661653144       | <p>AND Enantiomer</p>  <p>[*]c(:[*]):[c]1:[c]<br/>([*]):[*]:[*]:[c]:1:<br/>[*]</p> | -0.597       | 0 out of 2                                 |
| ECFP_4                                        | -932108170        | <p>AND Enantiomer</p>  <p>[*]C(=[*])N</p>                                        | -0.545       | 1 out of 6                                 |
| ECFP_4                                        | -1897341097       | <p>AND Enantiomer</p>  <p>[*]N[*]</p>                                            | -0.356       | 8 out of 29                                |



9a

## TOPKAT\_Mouse\_Female\_FDA\_Single\_vs\_Multiple

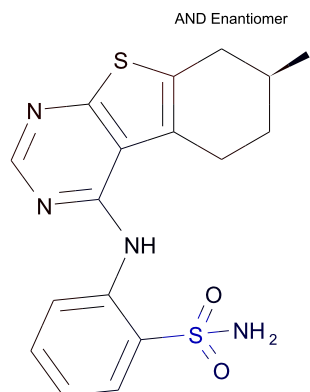C<sub>17</sub>H<sub>18</sub>N<sub>4</sub>O<sub>2</sub>S<sub>2</sub>

Molecular Weight: 374.48042

ALogP: 3.541

Rotatable Bonds: 3

Acceptors: 5

Donors: 2

**Model Prediction**

Prediction: Single-Carcinogen

Probability: 0.265

Enrichment: 0.646

Bayesian Score: -4.84

Mahalanobis Distance: 14.3

Mahalanobis Distance p-value: 3.91e-006

Prediction: Positive if the Bayesian score is above the estimated best cutoff value from minimizing the false positive and false negative rate.

Probability: The estimated probability that the sample is in the positive category. This assumes that the Bayesian score follows a normal distribution and is different from the prediction using a cutoff.

Enrichment: An estimate of enrichment, that is, the increased likelihood (versus random) of this sample being in the category. Bayesian Score: The standard Laplacian-modified Bayesian score.

Mahalanobis Distance: The Mahalanobis distance (MD) is the distance to the center of the training data. The larger the MD, the less trustworthy the prediction.

Mahalanobis Distance p-value: The p-value gives the fraction of training data with an MD greater than or equal to the one for the given sample, assuming normally distributed data. The smaller the p-value, the less trustworthy the prediction. For highly non-normal X properties (e.g., fingerprints), the MD p-value is wildly inaccurate.

**Structural Similar Compounds**

| Name               | Phenolphthalein                                                     | Sulfamethazine                                                      | Furosemide                                                          |
|--------------------|---------------------------------------------------------------------|---------------------------------------------------------------------|---------------------------------------------------------------------|
| Structure          |                                                                     |                                                                     |                                                                     |
| Actual Endpoint    | Multiple-Carcinogen                                                 | Single-Carcinogen                                                   | Single-Carcinogen                                                   |
| Predicted Endpoint | Multiple-Carcinogen                                                 | Single-Carcinogen                                                   | Single-Carcinogen                                                   |
| Distance           | 0.719                                                               | 0.719                                                               | 0.719                                                               |
| Reference          | US FDA (Centre for Drug Eval.& Res./Off. Testing & Res.) Sept. 1997 | US FDA (Centre for Drug Eval.& Res./Off. Testing & Res.) Sept. 1997 | US FDA (Centre for Drug Eval.& Res./Off. Testing & Res.) Sept. 1997 |

**Model Applicability**

Unknown features are fingerprint features in the query molecule, but not found or appearing too infrequently in the training set.

1. All properties and OPS components are within expected ranges.
2. Unknown ECFP\_2 feature: -1672647522: [\*]C[c]1:s:[\*]:[\*]:[c]:1[\*]
3. Unknown ECFP\_2 feature: -1597579789: [\*]:n:[c]1:s:[\*]:[\*]:[c]:1[\*]
4. Unknown ECFP\_2 feature: -1242906247: [\*]:[c]([\*])N([\*]):[\*]

**Feature Contribution****Top features for positive contribution**

| Fingerprint | Bit/Smiles | Feature Structure                                | Score | Multiple-Carcinogen in training set |
|-------------|------------|--------------------------------------------------|-------|-------------------------------------|
| ECFP_4      | 553181281  | <br><chem>*[C@@H]1[*]c2[*]:[*]c([*])c2CC1</chem> | 0.351 | 1 out of 1                          |



|                                               |                   |                                                                                                                                                                           |              |                                            |
|-----------------------------------------------|-------------------|---------------------------------------------------------------------------------------------------------------------------------------------------------------------------|--------------|--------------------------------------------|
| ECFP_4                                        | -1448786963       | <p>AND Enantiomer</p> 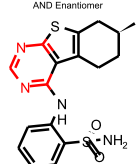 <p>[*][c]1:[*]:[c](:[*])<br/>:n:[cH]:n:1</p>                    | 0.351        | 1 out of 1                                 |
| ECFP_4                                        | 1635992319        | <p>AND Enantiomer</p>  <p>[*]N[c]1:[cH]:[cH]:[c<br/>H]:[*]:[c]:1[*]</p>                | 0.351        | 1 out of 1                                 |
| <b>Top Features for negative contribution</b> |                   |                                                                                                                                                                           |              |                                            |
| <b>Fingerprint</b>                            | <b>Bit/Smiles</b> | <b>Feature Structure</b>                                                                                                                                                  | <b>Score</b> | <b>Multiple-Carcinogen in training set</b> |
| ECFP_4                                        | 2102150379        | <p>AND Enantiomer</p>  <p>[*]S(=[*])(=O)[*]</p>                                        | -1.11        | 0 out of 5                                 |
| ECFP_4                                        | -797085356        | <p>AND Enantiomer</p>  <p>[*]S(=[*])(=[*])[*]</p>                                    | -1.11        | 0 out of 5                                 |
| ECFP_4                                        | -1661653144       | <p>AND Enantiomer</p>  <p>[*][c](:[*]):[c]1:[c]<br/>([*]):[*]:[*]:[c]:1:<br/>[*]</p> | -0.597       | 0 out of 2                                 |



9b

TOPKAT\_Mouse\_Female\_FDA\_Single\_vs\_Multiple

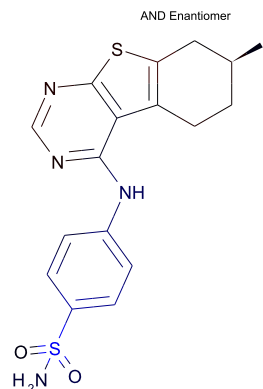C<sub>17</sub>H<sub>18</sub>N<sub>4</sub>O<sub>2</sub>S<sub>2</sub>

Molecular Weight: 374.48042

ALogP: 3.541

Rotatable Bonds: 3

Acceptors: 5

Donors: 2

**Model Prediction**

Prediction: Single-Carcinogen

Probability: 0.229

Enrichment: 0.558

Bayesian Score: -7.71

Mahalanobis Distance: 15.5

Mahalanobis Distance p-value: 3.18e-007

Prediction: Positive if the Bayesian score is above the estimated best cutoff value from minimizing the false positive and false negative rate.

Probability: The estimated probability that the sample is in the positive category. This assumes that the Bayesian score follows a normal distribution and is different from the prediction using a cutoff.

Enrichment: An estimate of enrichment, that is, the increased likelihood (versus random) of this sample being in the category. Bayesian Score: The standard Laplacian-modified Bayesian score.

Mahalanobis Distance: The Mahalanobis distance (MD) is the distance to the center of the training data. The larger the MD, the less trustworthy the prediction.

Mahalanobis Distance p-value: The p-value gives the fraction of training data with an MD greater than or equal to the one for the given sample, assuming normally distributed data. The smaller the p-value, the less trustworthy the prediction. For highly non-normal X properties (e.g., fingerprints), the MD p-value is wildly inaccurate.

**Structural Similar Compounds**

| Name               | Sulfamethazine                                                      | Phenolphthalein                                                     | Furoseamide                                                         |
|--------------------|---------------------------------------------------------------------|---------------------------------------------------------------------|---------------------------------------------------------------------|
| Structure          |                                                                     |                                                                     |                                                                     |
| Actual Endpoint    | Single-Carcinogen                                                   | Multiple-Carcinogen                                                 | Single-Carcinogen                                                   |
| Predicted Endpoint | Single-Carcinogen                                                   | Multiple-Carcinogen                                                 | Single-Carcinogen                                                   |
| Distance           | 0.700                                                               | 0.732                                                               | 0.744                                                               |
| Reference          | US FDA (Centre for Drug Eval.& Res./Off. Testing & Res.) Sept. 1997 | US FDA (Centre for Drug Eval.& Res./Off. Testing & Res.) Sept. 1997 | US FDA (Centre for Drug Eval.& Res./Off. Testing & Res.) Sept. 1997 |

**Model Applicability**

Unknown features are fingerprint features in the query molecule, but not found or appearing too infrequently in the training set.

1. All properties and OPS components are within expected ranges.
2. Unknown ECFP<sub>2</sub> feature: -1672647522: [\*]C[c]1:s:[\*]:[\*]:[c]:1[\*]
3. Unknown ECFP<sub>2</sub> feature: -1597579789: [\*]:n:[c]1:s:[\*]:[\*]:[c]:1[\*]
4. Unknown ECFP<sub>2</sub> feature: -1242906247: [\*]:[c](:[\*])N[c](:[\*]):[\*]

**Feature Contribution****Top features for positive contribution**

| Fingerprint       | Bit/Smiles  | Feature Structure                        | Score | Multiple-Carcinogen in training set |
|-------------------|-------------|------------------------------------------|-------|-------------------------------------|
| ECFP <sub>4</sub> | -1448786963 | <br>[*][c]1:[*]:[c](:[*])<br>:n:[cH]:n:1 | 0.351 | 1 out of 1                          |

|                                               |                   |                                                                                                                                                               |              |                                            |
|-----------------------------------------------|-------------------|---------------------------------------------------------------------------------------------------------------------------------------------------------------|--------------|--------------------------------------------|
| ECFP_4                                        | -710237522        | <p>AND Enantiomer</p> 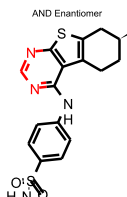 <p>[*]:n:[cH]:n:[*]</p>                              | 0.351        | 1 out of 1                                 |
| ECFP_4                                        | 553181281         | <p>AND Enantiomer</p>  <p>[*]C@@H[*]c2:[*]<br/>[*]e:[*]:c:2<br/>CC1</p>    | 0.351        | 1 out of 1                                 |
| <b>Top Features for negative contribution</b> |                   |                                                                                                                                                               |              |                                            |
| <b>Fingerprint</b>                            | <b>Bit/Smiles</b> | <b>Feature Structure</b>                                                                                                                                      | <b>Score</b> | <b>Multiple-Carcinogen in training set</b> |
| ECFP_4                                        | -797085356        | <p>AND Enantiomer</p>  <p>[*]S(=[*])(=[*])[*]</p>                          | -1.11        | 0 out of 5                                 |
| ECFP_4                                        | 2102150379        | <p>AND Enantiomer</p>  <p>[*]S(=[*])(=O)[*]</p>                          | -1.11        | 0 out of 5                                 |
| ECFP_4                                        | -177264675        | <p>AND Enantiomer</p>  <p>[*]S(=[*])(=[*])[c]:<br/>[cH]:[*]:[cH]:[*]</p> | -0.968       | 0 out of 4                                 |



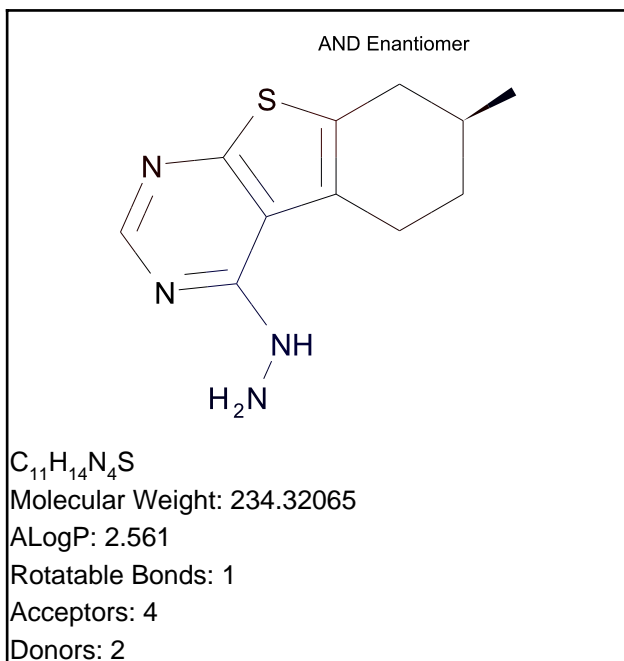

### Model Prediction

Prediction: Single-Carcinogen

Probability: 0.327

Enrichment: 0.798

Bayesian Score: -2.14

Mahalanobis Distance: 15.2

Mahalanobis Distance p-value: 6.92e-007

Prediction: Positive if the Bayesian score is above the estimated best cutoff value from minimizing the false positive and false negative rate.

Probability: The estimated probability that the sample is in the positive category. This assumes that the Bayesian score follows a normal distribution and is different from the prediction using a cutoff.

Enrichment: An estimate of enrichment, that is, the increased likelihood (versus random) of this sample being in the category.

Bayesian Score: The standard Laplacian-modified Bayesian score.

Mahalanobis Distance: The Mahalanobis distance (MD) is the distance to the center of the training data. The larger the MD, the less trustworthy the prediction.

Mahalanobis Distance p-value: The p-value gives the fraction of training data with an MD greater than or equal to the one for the given sample, assuming normally distributed data. The smaller the p-value, the less trustworthy the prediction. For highly non-normal X properties (e.g., fingerprints), the MD p-value is wildly inaccurate.

### Structural Similar Compounds

| Name               | Phenazopyridine                                                     | Hydralazine                                                         | Proflavine                                                          |
|--------------------|---------------------------------------------------------------------|---------------------------------------------------------------------|---------------------------------------------------------------------|
| Structure          |                                                                     |                                                                     |                                                                     |
| Actual Endpoint    | Single-Carcinogen                                                   | Single-Carcinogen                                                   | Single-Carcinogen                                                   |
| Predicted Endpoint | Single-Carcinogen                                                   | Single-Carcinogen                                                   | Single-Carcinogen                                                   |
| Distance           | 0.584                                                               | 0.608                                                               | 0.638                                                               |
| Reference          | US FDA (Centre for Drug Eval.& Res./Off. Testing & Res.) Sept. 1997 | US FDA (Centre for Drug Eval.& Res./Off. Testing & Res.) Sept. 1997 | US FDA (Centre for Drug Eval.& Res./Off. Testing & Res.) Sept. 1997 |

### Model Applicability

Unknown features are fingerprint features in the query molecule, but not found or appearing too infrequently in the training set.

1. All properties and OPS components are within expected ranges.
2. Unknown ECFP\_2 feature: -1672647522: [\*]C[c]1:s:[\*]:[\*]:[c]:1[\*]
3. Unknown ECFP\_2 feature: -1597579789: [\*]:n:[c]1:s:[\*]:[\*]:[c]:1[\*]

### Feature Contribution

#### Top features for positive contribution

| Fingerprint | Bit/Smiles  | Feature Structure                                                                                                         | Score | Multiple-Carcinogen in training set |
|-------------|-------------|---------------------------------------------------------------------------------------------------------------------------|-------|-------------------------------------|
| ECFP_4      | -1448786963 | <p style="text-align: center;">AND Enantiomer</p> <p style="text-align: center;">[*]c]1:[*]:[c](:[*])<br/>:n:[cH]:n:1</p> | 0.351 | 1 out of 1                          |

|                                               |                   |                                                                                                                                                                       |              |                                            |
|-----------------------------------------------|-------------------|-----------------------------------------------------------------------------------------------------------------------------------------------------------------------|--------------|--------------------------------------------|
| ECFP_4                                        | -710237522        | <p>AND Enantiomer</p> 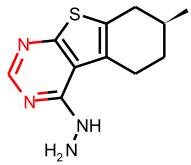 <p>[*]:n:[cH]:n:[*]</p>                                     | 0.351        | 1 out of 1                                 |
| ECFP_4                                        | 85262808          | <p>AND Enantiomer</p>  <p>[*][c]1:[*]:[*]:[c]:<br/>[*]:s:1</p>                     | 0.351        | 1 out of 1                                 |
| <b>Top Features for negative contribution</b> |                   |                                                                                                                                                                       |              |                                            |
| <b>Fingerprint</b>                            | <b>Bit/Smiles</b> | <b>Feature Structure</b>                                                                                                                                              | <b>Score</b> | <b>Multiple-Carcinogen in training set</b> |
| ECFP_4                                        | -1661653144       | <p>AND Enantiomer</p>  <p>[*][c]:[*]:[c]1:[c]<br/>([*]):[*]:[*]:[c]:1:<br/>[*]</p> | -0.597       | 0 out of 2                                 |
| ECFP_4                                        | -1897341097       | <p>AND Enantiomer</p>  <p>[*]N[*]</p>                                            | -0.356       | 8 out of 29                                |
| ECFP_4                                        | 1049768340        | <p>AND Enantiomer</p>  <p>[*]N[c]:n:[*]:[c]:<br/>[*]:[*]</p>                     | -0.342       | 0 out of 1                                 |





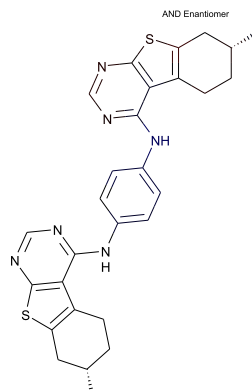

$C_{28}H_{28}N_6S_2$

Molecular Weight: 512.69212

ALogP: 7.842

Rotatable Bonds: 4

Acceptors: 6

Donors: 2

## Model Prediction

Prediction: Multiple-Carcinogen

Probability: 0.381

Enrichment: 0.929

Bayesian Score: -0.526

Mahalanobis Distance: 16.4

Mahalanobis Distance p-value: 6e-008

Prediction: Positive if the Bayesian score is above the estimated best cutoff value from minimizing the false positive and false negative rate.

Probability: The estimated probability that the sample is in the positive category. This assumes that the Bayesian score follows a normal distribution and is different from the prediction using a cutoff.

Enrichment: An estimate of enrichment, that is, the increased likelihood (versus random) of this sample being in the category. Bayesian Score: The standard Laplacian-modified Bayesian score.

Mahalanobis Distance: The Mahalanobis distance (MD) is the distance to the center of the training data. The larger the MD, the less trustworthy the prediction.

Mahalanobis Distance p-value: The p-value gives the fraction of training data with an MD greater than or equal to the one for the given sample, assuming normally distributed data. The smaller the p-value, the less trustworthy the prediction. For highly non-normal X properties (e.g., fingerprints), the MD p-value is wildly inaccurate.

## Structural Similar Compounds

| Name               | Glimepride                                                          | Simvastatin                                                         | Lovastatin                                                          |
|--------------------|---------------------------------------------------------------------|---------------------------------------------------------------------|---------------------------------------------------------------------|
| Structure          |                                                                     |                                                                     |                                                                     |
| Actual Endpoint    | Single-Carcinogen                                                   | Multiple-Carcinogen                                                 | Multiple-Carcinogen                                                 |
| Predicted Endpoint | Single-Carcinogen                                                   | Multiple-Carcinogen                                                 | Multiple-Carcinogen                                                 |
| Distance           | 0.899                                                               | 0.911                                                               | 0.940                                                               |
| Reference          | US FDA (Centre for Drug Eval.& Res./Off. Testing & Res.) Sept. 1997 | US FDA (Centre for Drug Eval.& Res./Off. Testing & Res.) Sept. 1997 | US FDA (Centre for Drug Eval.& Res./Off. Testing & Res.) Sept. 1997 |

## Model Applicability

Unknown features are fingerprint features in the query molecule, but not found or appearing too infrequently in the training set.

1. All properties and OPS components are within expected ranges.
2. Unknown ECFP\_2 feature: -1672647522: [\*]C[c]1:s:[\*]:[\*]:[c]:1[\*]
3. Unknown ECFP\_2 feature: -1597579789: [\*]:n:[c]1:s:[\*]:[\*]:[c]:1[\*]
4. Unknown ECFP\_2 feature: -1242906247: [\*]:[c]([\*])N(c)([\*]):[\*]

## Feature Contribution

### Top features for positive contribution

| Fingerprint | Bit/Smiles  | Feature Structure                       | Score | Multiple-Carcinogen in training set |
|-------------|-------------|-----------------------------------------|-------|-------------------------------------|
| ECFP_4      | -1448786963 | <br>[*][c]1:[*]:[c]([*])<br>:n:[cH]:n:1 | 0.351 | 1 out of 1                          |

|                                               |                   |                                                                                                                                                                             |              |                                            |
|-----------------------------------------------|-------------------|-----------------------------------------------------------------------------------------------------------------------------------------------------------------------------|--------------|--------------------------------------------|
| ECFP_4                                        | 85262808          | <p>AND Enantiomer</p> 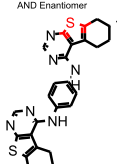 <p><chem>[*][c]1:[*]:[*]:[c](:[*]):s:1</chem></p>                 | 0.351        | 1 out of 1                                 |
| ECFP_4                                        | -710237522        | <p>AND Enantiomer</p>  <p><chem>[*]:n:[cH]:n:[*]</chem></p>                              | 0.351        | 1 out of 1                                 |
| <b>Top Features for negative contribution</b> |                   |                                                                                                                                                                             |              |                                            |
| <b>Fingerprint</b>                            | <b>Bit/Smiles</b> | <b>Feature Structure</b>                                                                                                                                                    | <b>Score</b> | <b>Multiple-Carcinogen in training set</b> |
| ECFP_4                                        | 888054369         | <p>AND Enantiomer</p>  <p><chem>[*]N[c]1:[cH]:[*]:[c]([*]):[cH]:[cH]:1</chem></p>        | -0.8         | 0 out of 3                                 |
| ECFP_4                                        | -1661653144       | <p>AND Enantiomer</p>  <p><chem>[*][c](:[*])[c]1:[c]([*]):[*]:[*]:[c]:1:[*]</chem></p> | -0.597       | 0 out of 2                                 |
| ECFP_4                                        | -1897341097       | <p>AND Enantiomer</p>  <p><chem>[*]N[*]</chem></p>                                     | -0.356       | 8 out of 29                                |



5a

TOPKAT\_Mouse\_Male\_FDA\_None\_vs\_Carcinogen

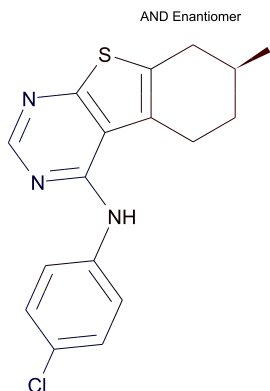C<sub>17</sub>H<sub>16</sub>ClN<sub>3</sub>S

Molecular Weight: 329.84704

ALogP: 5.5

Rotatable Bonds: 2

Acceptors: 3

Donors: 1

**Model Prediction****Prediction: Carcinogen**

Probability: 0.266

Enrichment: 0.904

Bayesian Score: -1.58

Mahalanobis Distance: 15.4

Mahalanobis Distance p-value: 1.47e-008

Prediction: Positive if the Bayesian score is above the estimated best cutoff value from minimizing the false positive and false negative rate.

Probability: The estimated probability that the sample is in the positive category. This assumes that the Bayesian score follows a normal distribution and is different from the prediction using a cutoff.

Enrichment: An estimate of enrichment, that is, the increased likelihood (versus random) of this sample being in the category.

Bayesian Score: The standard Laplacian-modified Bayesian score.

Mahalanobis Distance: The Mahalanobis distance (MD) is the distance to the center of the training data. The larger the MD, the less trustworthy the prediction.

Mahalanobis Distance p-value: The p-value gives the fraction of training data with an MD greater than or equal to the one for the given sample, assuming normally distributed data. The smaller the p-value, the less trustworthy the prediction. For highly non-normal X properties (e.g., fingerprints), the MD p-value is wildly inaccurate.

**Structural Similar Compounds**

| Name               | Indomethacin                                                        | Nafenopin                                                           | Mestranol                                                           |
|--------------------|---------------------------------------------------------------------|---------------------------------------------------------------------|---------------------------------------------------------------------|
| Structure          |                                                                     |                                                                     |                                                                     |
| Actual Endpoint    | Non-Carcinogen                                                      | Carcinogen                                                          | Carcinogen                                                          |
| Predicted Endpoint | Non-Carcinogen                                                      | Carcinogen                                                          | Carcinogen                                                          |
| Distance           | 0.619                                                               | 0.622                                                               | 0.639                                                               |
| Reference          | US FDA (Centre for Drug Eval.& Res./Off. Testing & Res.) Sept. 1997 | US FDA (Centre for Drug Eval.& Res./Off. Testing & Res.) Sept. 1997 | US FDA (Centre for Drug Eval.& Res./Off. Testing & Res.) Sept. 1997 |

**Model Applicability**

Unknown features are fingerprint features in the query molecule, but not found or appearing too infrequently in the training set.

1. OPS PC19 out of range. Value: -3.237. Training min, max, SD, explained variance: -2.8152, 4.6113, 1.185, 0.0147.

**Feature Contribution****Top features for positive contribution**

| Fingerprint | Bit/Smiles  | Feature Structure                          | Score | Carcinogen in training set |
|-------------|-------------|--------------------------------------------|-------|----------------------------|
| FCFP_6      | -1441604640 | <br><chem>[*]:[*]1:[*]C[C@@H](C)CC1</chem> | 0.77  | 4 out of 5                 |

|                                               |                   |                                                                                                                                                              |              |                                   |
|-----------------------------------------------|-------------------|--------------------------------------------------------------------------------------------------------------------------------------------------------------|--------------|-----------------------------------|
| FCFP_6                                        | -773983804        | <p>AND Enantiomer</p> 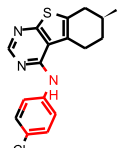 <p>[*]N[c]1:[cH]:[*]:[c]<br/>([*]):[cH]:[cH]:1</p> | 0.409        | 10 out of 24                      |
| FCFP_6                                        | -1043339860       | <p>AND Enantiomer</p>  <p>[*]CC(C)C[*]</p>                                | 0.383        | 24 out of 61                      |
| <b>Top Features for negative contribution</b> |                   |                                                                                                                                                              |              |                                   |
| <b>Fingerprint</b>                            | <b>Bit/Smiles</b> | <b>Feature Structure</b>                                                                                                                                     | <b>Score</b> | <b>Carcinogen in training set</b> |
| FCFP_6                                        | -124685461        | <p>AND Enantiomer</p>  <p>[*]:n:[cH]:n:[*]</p>                            | -0.731       | 1 out of 12                       |
| FCFP_6                                        | 1293778554        | <p>AND Enantiomer</p>  <p>[*]:[c]:[*])N[c]:[*]<br/>):[*]</p>             | -0.719       | 0 out of 4                        |
| FCFP_6                                        | 551850122         | <p>AND Enantiomer</p>  <p>[*][c]1:[*]:[cH]:[c]<br/>(Cl):[cH]:[cH]:1</p> | -0.433       | 8 out of 49                       |

5b

TOPKAT\_Mouse\_Male\_FDA\_None\_vs\_Carcinogen

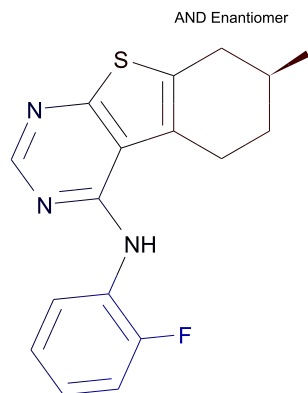C<sub>17</sub>H<sub>16</sub>FN<sub>3</sub>S

Molecular Weight: 313.39244

ALogP: 5.041

Rotatable Bonds: 2

Acceptors: 3

Donors: 1

**Model Prediction****Prediction: Carcinogen**

Probability: 0.273

Enrichment: 0.926

Bayesian Score: -1.3

Mahalanobis Distance: 17.2

Mahalanobis Distance p-value: 2.45e-012

Prediction: Positive if the Bayesian score is above the estimated best cutoff value from minimizing the false positive and false negative rate.

Probability: The estimated probability that the sample is in the positive category. This assumes that the Bayesian score follows a normal distribution and is different from the prediction using a cutoff.

Enrichment: An estimate of enrichment, that is, the increased likelihood (versus random) of this sample being in the category.

Bayesian Score: The standard Laplacian-modified Bayesian score.

Mahalanobis Distance: The Mahalanobis distance (MD) is the distance to the center of the training data. The larger the MD, the less trustworthy the prediction.

Mahalanobis Distance p-value: The p-value gives the fraction of training data with an MD greater than or equal to the one for the given sample, assuming normally distributed data. The smaller the p-value, the less trustworthy the prediction. For highly non-normal X properties (e.g., fingerprints), the MD p-value is wildly inaccurate.

**Structural Similar Compounds**

| Name               | Diclofenac                                                          | Nafenopin                                                           | Indomethacin                                                        |
|--------------------|---------------------------------------------------------------------|---------------------------------------------------------------------|---------------------------------------------------------------------|
| Structure          |                                                                     |                                                                     |                                                                     |
| Actual Endpoint    | Non-Carcinogen                                                      | Carcinogen                                                          | Non-Carcinogen                                                      |
| Predicted Endpoint | Non-Carcinogen                                                      | Carcinogen                                                          | Non-Carcinogen                                                      |
| Distance           | 0.600                                                               | 0.610                                                               | 0.621                                                               |
| Reference          | US FDA (Centre for Drug Eval.& Res./Off. Testing & Res.) Sept. 1997 | US FDA (Centre for Drug Eval.& Res./Off. Testing & Res.) Sept. 1997 | US FDA (Centre for Drug Eval.& Res./Off. Testing & Res.) Sept. 1997 |

**Model Applicability**

Unknown features are fingerprint features in the query molecule, but not found or appearing too infrequently in the training set.

1. OPS PC19 out of range. Value: -2.8919. Training min, max, SD, explained variance: -2.8152, 4.6113, 1.185, 0.0147.

**Feature Contribution****Top features for positive contribution**

| Fingerprint | Bit/Smiles  | Feature Structure                          | Score | Carcinogen in training set |
|-------------|-------------|--------------------------------------------|-------|----------------------------|
| FCFP_6      | -1441604640 | <br><chem>[*]:[*]1:[*]C[C@@H](C)CC1</chem> | 0.77  | 4 out of 5                 |

|                                               |                   |                                                                                                                                                              |              |                                   |
|-----------------------------------------------|-------------------|--------------------------------------------------------------------------------------------------------------------------------------------------------------|--------------|-----------------------------------|
| FCFP_6                                        | -773983804        | <p>AND Enantiomer</p> 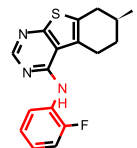 <p>[*]N[c]1:[cH]:[*]:[c]<br/>([*]):[cH]:[cH]:1</p> | 0.409        | 10 out of 24                      |
| FCFP_6                                        | -1043339860       | <p>AND Enantiomer</p>  <p>[*]CC(C)C[*]</p>                                | 0.383        | 24 out of 61                      |
| <b>Top Features for negative contribution</b> |                   |                                                                                                                                                              |              |                                   |
| <b>Fingerprint</b>                            | <b>Bit/Smiles</b> | <b>Feature Structure</b>                                                                                                                                     | <b>Score</b> | <b>Carcinogen in training set</b> |
| FCFP_6                                        | -2095752315       | <p>AND Enantiomer</p>  <p>[*][c]1:[cH]:[cH]:[cH]<br/>]:[cH]:[c]:1F</p>    | -1.13        | 0 out of 8                        |
| FCFP_6                                        | -124685461        | <p>AND Enantiomer</p>  <p>[*]:n:[cH]:n:[*]</p>                          | -0.731       | 1 out of 12                       |
| FCFP_6                                        | 1293778554        | <p>AND Enantiomer</p>  <p>[*]:[c]:[*]N[c]:[*]<br/>]:[*]</p>             | -0.719       | 0 out of 4                        |

5c

TOPKAT\_Mouse\_Male\_FDA\_None\_vs\_Carcinogen

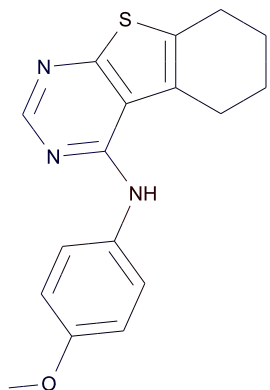C<sub>17</sub>H<sub>17</sub>N<sub>3</sub>OS

Molecular Weight: 311.40138

ALogP: 4.568

Rotatable Bonds: 3

Acceptors: 4

Donors: 1

### Model Prediction

Prediction: Non-Carcinogen

Probability: 0.232

Enrichment: 0.789

Bayesian Score: -3.15

Mahalanobis Distance: 15.4

Mahalanobis Distance p-value: 1.79e-008

Prediction: Positive if the Bayesian score is above the estimated best cutoff value from minimizing the false positive and false negative rate.

Probability: The estimated probability that the sample is in the positive category. This assumes that the Bayesian score follows a normal distribution and is different from the prediction using a cutoff.

Enrichment: An estimate of enrichment, that is, the increased likelihood (versus random) of this sample being in the category.

Bayesian Score: The standard Laplacian-modified Bayesian score.

Mahalanobis Distance: The Mahalanobis distance (MD) is the distance to the center of the training data. The larger the MD, the less trustworthy the prediction.

Mahalanobis Distance p-value: The p-value gives the fraction of training data with an MD greater than or equal to the one for the given sample, assuming normally distributed data. The smaller the p-value, the less trustworthy the prediction. For highly non-normal X properties (e.g., fingerprints), the MD p-value is wildly inaccurate.

### Structural Similar Compounds

| Name               | Indomethacin                                                        | Nafenopin                                                           | Oxaprocin                                                           |
|--------------------|---------------------------------------------------------------------|---------------------------------------------------------------------|---------------------------------------------------------------------|
| Structure          |                                                                     |                                                                     |                                                                     |
| Actual Endpoint    | Non-Carcinogen                                                      | Carcinogen                                                          | Carcinogen                                                          |
| Predicted Endpoint | Non-Carcinogen                                                      | Carcinogen                                                          | Carcinogen                                                          |
| Distance           | 0.540                                                               | 0.597                                                               | 0.632                                                               |
| Reference          | US FDA (Centre for Drug Eval.& Res./Off. Testing & Res.) Sept. 1997 | US FDA (Centre for Drug Eval.& Res./Off. Testing & Res.) Sept. 1997 | US FDA (Centre for Drug Eval.& Res./Off. Testing & Res.) Sept. 1997 |

### Model Applicability

Unknown features are fingerprint features in the query molecule, but not found or appearing too infrequently in the training set.

1. OPS PC19 out of range. Value: -3.0431. Training min, max, SD, explained variance: -2.8152, 4.6113, 1.185, 0.0147.

### Feature Contribution

#### Top features for positive contribution

| Fingerprint | Bit/Smiles  | Feature Structure                          | Score | Carcinogen in training set |
|-------------|-------------|--------------------------------------------|-------|----------------------------|
| FCFP_6      | -1060187936 | <br>[*]N[c]1:[cH]:[cH]:[c](OC):[cH]:[cH]:1 | 0.46  | 1 out of 1                 |



| FCFP_6                                        | -773983804 | 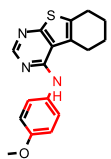<br>[*]N[c]1:[cH]:[*]:[c]<br>([*]):[cH]:[cH]:1  | 0.409  | 10 out of 24               |
|-----------------------------------------------|------------|------------------------------------------------------------------------------------------------------------------------------------|--------|----------------------------|
| FCFP_6                                        | 590925877  | <br>[*]N[c]:([cH]:[*]):[c]<br>H]:[*]            | 0.369  | 13 out of 33               |
| <b>Top Features for negative contribution</b> |            |                                                                                                                                    |        |                            |
| Fingerprint                                   | Bit/Smiles | Feature Structure                                                                                                                  | Score  | Carcinogen in training set |
| FCFP_6                                        | -124685461 | <br>[*]:n:[cH]:n:[*]                            | -0.731 | 1 out of 12                |
| FCFP_6                                        | 1293778554 | <br>[*]:[c]:([*])N[c]:([*]<br>]):[*]           | -0.719 | 0 out of 4                 |
| FCFP_6                                        | -9847677   | <br>[*][c]1:[cH]:[cH]:[c]<br>(OC):[cH]:[cH]:1 | -0.719 | 0 out of 4                 |

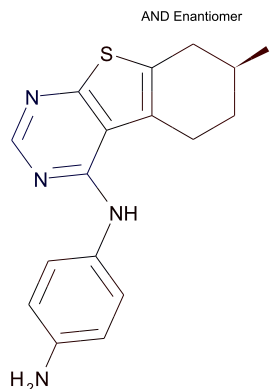

$C_{17}H_{18}N_4S$

Molecular Weight: 310.41662

ALogP: 4.089

Rotatable Bonds: 2

Acceptors: 4

Donors: 2

## Model Prediction

**Prediction: Carcinogen**

Probability: 0.339

Enrichment: 1.15

Bayesian Score: 1.16

Mahalanobis Distance: 13.3

Mahalanobis Distance p-value: 8.27e-005

Prediction: Positive if the Bayesian score is above the estimated best cutoff value from minimizing the false positive and false negative rate.

Probability: The estimated probability that the sample is in the positive category. This assumes that the Bayesian score follows a normal distribution and is different from the prediction using a cutoff.

Enrichment: An estimate of enrichment, that is, the increased likelihood (versus random) of this sample being in the category.

Bayesian Score: The standard Laplacian-modified Bayesian score.

Mahalanobis Distance: The Mahalanobis distance (MD) is the distance to the center of the training data. The larger the MD, the less trustworthy the prediction.

Mahalanobis Distance p-value: The p-value gives the fraction of training data with an MD greater than or equal to the one for the given sample, assuming normally distributed data. The smaller the p-value, the less trustworthy the prediction. For highly non-normal X properties (e.g., fingerprints), the MD p-value is wildly inaccurate.

## Structural Similar Compounds

| Name               | Niclosamide                                                         | Phenolphthalein                                                     | Pyrimethamine                                                       |
|--------------------|---------------------------------------------------------------------|---------------------------------------------------------------------|---------------------------------------------------------------------|
| Structure          |                                                                     |                                                                     |                                                                     |
| Actual Endpoint    | Non-Carcinogen                                                      | Carcinogen                                                          | Non-Carcinogen                                                      |
| Predicted Endpoint | Non-Carcinogen                                                      | Carcinogen                                                          | Non-Carcinogen                                                      |
| Distance           | 0.548                                                               | 0.572                                                               | 0.594                                                               |
| Reference          | US FDA (Centre for Drug Eval.& Res./Off. Testing & Res.) Sept. 1997 | US FDA (Centre for Drug Eval.& Res./Off. Testing & Res.) Sept. 1997 | US FDA (Centre for Drug Eval.& Res./Off. Testing & Res.) Sept. 1997 |

## Model Applicability

Unknown features are fingerprint features in the query molecule, but not found or appearing too infrequently in the training set.

1. All properties and OPS components are within expected ranges.

## Feature Contribution

### Top features for positive contribution

| Fingerprint | Bit/Smiles | Feature Structure                          | Score | Carcinogen in training set |
|-------------|------------|--------------------------------------------|-------|----------------------------|
| FCFP_6      | 1441604640 | <br><chem>[*]:[c]1:[*]C[C@@H](C)CC1</chem> | 0.77  | 4 out of 5                 |

|                                               |                   |                                                                                                                                                                      |              |                                   |
|-----------------------------------------------|-------------------|----------------------------------------------------------------------------------------------------------------------------------------------------------------------|--------------|-----------------------------------|
| FCFP_6                                        | -773983804        | <p>AND Enantiomer</p> 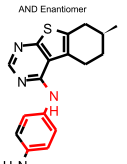 <p><chem>[*]N[c]1:[cH]:[*]:[c]([*]):[cH]:[cH]:1</chem></p> | 0.409        | 10 out of 24                      |
| FCFP_6                                        | -1043339860       | <p>AND Enantiomer</p>  <p><chem>[*]CC(C)C[*]</chem></p>                           | 0.383        | 24 out of 61                      |
| <b>Top Features for negative contribution</b> |                   |                                                                                                                                                                      |              |                                   |
| <b>Fingerprint</b>                            | <b>Bit/Smiles</b> | <b>Feature Structure</b>                                                                                                                                             | <b>Score</b> | <b>Carcinogen in training set</b> |
| FCFP_6                                        | -124685461        | <p>AND Enantiomer</p>  <p><chem>[*]:n:[cH]:n:[*]</chem></p>                       | -0.731       | 1 out of 12                       |
| FCFP_6                                        | 1293778554        | <p>AND Enantiomer</p>  <p><chem>[*]:[c](:[*])N[c](:[*])[*]</chem></p>            | -0.719       | 0 out of 4                        |
| FCFP_6                                        | -475316933        | <p>AND Enantiomer</p>  <p><chem>[*][c]1:[*]:[c](:[*]):n:[cH]:n:1</chem></p>     | -0.423       | 0 out of 2                        |

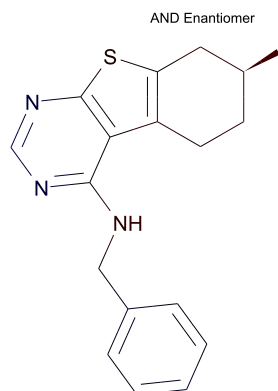

$C_{18}H_{19}N_3S$

Molecular Weight: 309.42856

ALogP: 4.678

Rotatable Bonds: 3

Acceptors: 3

Donors: 1

## Model Prediction

Prediction: **Carcinogen**

Probability: 0.325

Enrichment: 1.1

Bayesian Score: 0.677

Mahalanobis Distance: 14.1

Mahalanobis Distance p-value: 4.11e-006

Prediction: Positive if the Bayesian score is above the estimated best cutoff value from minimizing the false positive and false negative rate.

Probability: The estimated probability that the sample is in the positive category. This assumes that the Bayesian score follows a normal distribution and is different from the prediction using a cutoff.

Enrichment: An estimate of enrichment, that is, the increased likelihood (versus random) of this sample being in the category.

Bayesian Score: The standard Laplacian-modified Bayesian score.

Mahalanobis Distance: The Mahalanobis distance (MD) is the distance to the center of the training data. The larger the MD, the less trustworthy the prediction.

Mahalanobis Distance p-value: The p-value gives the fraction of training data with an MD greater than or equal to the one for the given sample, assuming normally distributed data. The smaller the p-value, the less trustworthy the prediction. For highly non-normal X properties (e.g., fingerprints), the MD p-value is wildly inaccurate.

## Structural Similar Compounds

| Name               | Nafenopin                                                           | Indomethacin                                                        | Pergolide                                                           |
|--------------------|---------------------------------------------------------------------|---------------------------------------------------------------------|---------------------------------------------------------------------|
| Structure          |                                                                     |                                                                     |                                                                     |
| Actual Endpoint    | Carcinogen                                                          | Non-Carcinogen                                                      | Non-Carcinogen                                                      |
| Predicted Endpoint | Carcinogen                                                          | Non-Carcinogen                                                      | Non-Carcinogen                                                      |
| Distance           | 0.548                                                               | 0.591                                                               | 0.601                                                               |
| Reference          | US FDA (Centre for Drug Eval.& Res./Off. Testing & Res.) Sept. 1997 | US FDA (Centre for Drug Eval.& Res./Off. Testing & Res.) Sept. 1997 | US FDA (Centre for Drug Eval.& Res./Off. Testing & Res.) Sept. 1997 |

## Model Applicability

Unknown features are fingerprint features in the query molecule, but not found or appearing too infrequently in the training set.

1. All properties and OPS components are within expected ranges.

## Feature Contribution

### Top features for positive contribution

| Fingerprint | Bit/Smiles | Feature Structure                          | Score | Carcinogen in training set |
|-------------|------------|--------------------------------------------|-------|----------------------------|
| FCFP_6      | 1441604640 | <br><chem>[*]:[c]1:[*]C[C@@H](C)CC1</chem> | 0.77  | 4 out of 5                 |

|                                               |                   |                                                                                                                                                         |              |                                   |
|-----------------------------------------------|-------------------|---------------------------------------------------------------------------------------------------------------------------------------------------------|--------------|-----------------------------------|
| FCFP_6                                        | 1294255210        | <p>AND Enantiomer</p> 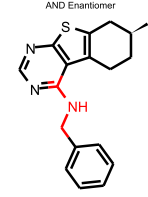 <p>[*]CN[c](:[*]):[*]</p>                     | 0.441        | 12 out of 28                      |
| FCFP_6                                        | -1043339860       | <p>AND Enantiomer</p>  <p>[*]CC(C)C[*]</p>                           | 0.383        | 24 out of 61                      |
| <b>Top Features for negative contribution</b> |                   |                                                                                                                                                         |              |                                   |
| <b>Fingerprint</b>                            | <b>Bit/Smiles</b> | <b>Feature Structure</b>                                                                                                                                | <b>Score</b> | <b>Carcinogen in training set</b> |
| FCFP_6                                        | -124685461        | <p>AND Enantiomer</p>  <p>[*]:n:[cH]:n:[*]</p>                       | -0.731       | 1 out of 12                       |
| FCFP_6                                        | -475316933        | <p>AND Enantiomer</p>  <p>[*][c]1:[*]:[c](:[*])<br/>:n:[cH]:n:1</p> | -0.423       | 0 out of 2                        |
| FCFP_6                                        | 907007053         | <p>AND Enantiomer</p>  <p>[*]C([*])C[c](:[*]):[*]</p>              | -0.366       | 11 out of 62                      |

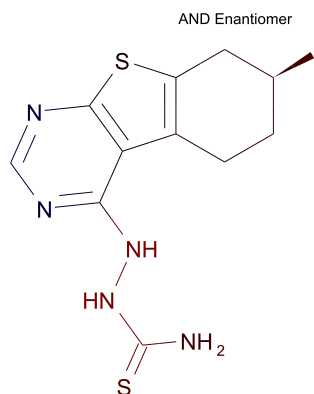

$C_{12}H_{15}N_5S_2$   
 Molecular Weight: 293.411  
 ALogP: 3.209  
 Rotatable Bonds: 3  
 Acceptors: 4  
 Donors: 3

### Model Prediction

**Prediction: Carcinogen**

Probability: 0.397

Enrichment: 1.35

Bayesian Score: 2.93

Mahalanobis Distance: 14

Mahalanobis Distance p-value: 7.25e-006

Prediction: Positive if the Bayesian score is above the estimated best cutoff value from minimizing the false positive and false negative rate.

Probability: The estimated probability that the sample is in the positive category. This assumes that the Bayesian score follows a normal distribution and is different from the prediction using a cutoff.

Enrichment: An estimate of enrichment, that is, the increased likelihood (versus random) of this sample being in the category.  
 Bayesian Score: The standard Laplacian-modified Bayesian score.

Mahalanobis Distance: The Mahalanobis distance (MD) is the distance to the center of the training data. The larger the MD, the less trustworthy the prediction.

Mahalanobis Distance p-value: The p-value gives the fraction of training data with an MD greater than or equal to the one for the given sample, assuming normally distributed data. The smaller the p-value, the less trustworthy the prediction. For highly non-normal X properties (e.g., fingerprints), the MD p-value is wildly inaccurate.

### Structural Similar Compounds

| Name               | Furoseamide                                                         | Phenazopyridine                                                     | Dapsone                                                             |
|--------------------|---------------------------------------------------------------------|---------------------------------------------------------------------|---------------------------------------------------------------------|
| Structure          |                                                                     |                                                                     |                                                                     |
| Actual Endpoint    | Non-Carcinogen                                                      | Non-Carcinogen                                                      | Non-Carcinogen                                                      |
| Predicted Endpoint | Non-Carcinogen                                                      | Carcinogen                                                          | Carcinogen                                                          |
| Distance           | 0.683                                                               | 0.712                                                               | 0.715                                                               |
| Reference          | US FDA (Centre for Drug Eval.& Res./Off. Testing & Res.) Sept. 1997 | US FDA (Centre for Drug Eval.& Res./Off. Testing & Res.) Sept. 1997 | US FDA (Centre for Drug Eval.& Res./Off. Testing & Res.) Sept. 1997 |

### Model Applicability

Unknown features are fingerprint features in the query molecule, but not found or appearing too infrequently in the training set.

- OPS PC30 out of range. Value: -2.6109. Training min, max, SD, explained variance: -2.5648, 3.3898, 0.9347, 0.0092.

### Feature Contribution

#### Top features for positive contribution

| Fingerprint | Bit/Smiles  | Feature Structure | Score | Carcinogen in training set |
|-------------|-------------|-------------------|-------|----------------------------|
| FCFP_6      | -1441604640 |                   | 0.77  | 4 out of 5                 |

|                                               |                   |                                                                                                                                                         |              |                                   |
|-----------------------------------------------|-------------------|---------------------------------------------------------------------------------------------------------------------------------------------------------|--------------|-----------------------------------|
| FCFP_6                                        | -885461129        | <p>AND Enantiomer</p> 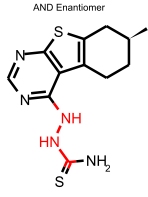 <p>[*]NNC(=[*])[*]</p>                        | 0.547        | 3 out of 5                        |
| FCFP_6                                        | 1294344583        | <p>AND Enantiomer</p>  <p>[*]NN[c](:[*]):[*]</p>                     | 0.517        | 2 out of 3                        |
| <b>Top Features for negative contribution</b> |                   |                                                                                                                                                         |              |                                   |
| <b>Fingerprint</b>                            | <b>Bit/Smiles</b> | <b>Feature Structure</b>                                                                                                                                | <b>Score</b> | <b>Carcinogen in training set</b> |
| FCFP_6                                        | -124685461        | <p>AND Enantiomer</p>  <p>[*]:n:[cH]:n:[*]</p>                       | -0.731       | 1 out of 12                       |
| FCFP_6                                        | -475316933        | <p>AND Enantiomer</p>  <p>[*][c]1:[*]:[c](:[*])<br/>:n:[cH]:n:1</p> | -0.423       | 0 out of 2                        |
| FCFP_6                                        | 907007053         | <p>AND Enantiomer</p>  <p>[*]C([*])C[c](:[*]):[*]</p>              | -0.366       | 11 out of 62                      |

9a

## TOPKAT\_Mouse\_Male\_FDA\_None\_vs\_Carcinogen

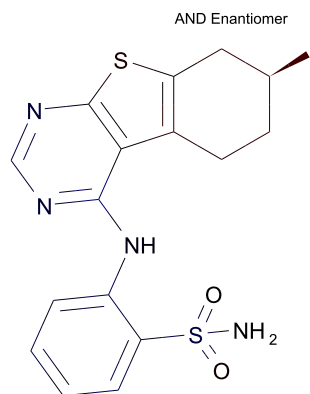C<sub>17</sub>H<sub>18</sub>N<sub>4</sub>O<sub>2</sub>S<sub>2</sub>

Molecular Weight: 374.48042

ALogP: 3.541

Rotatable Bonds: 3

Acceptors: 5

Donors: 2

**Model Prediction****Prediction: Carcinogen**

Probability: 0.286

Enrichment: 0.973

Bayesian Score: -0.74

Mahalanobis Distance: 15.1

Mahalanobis Distance p-value: 6.79e-008

Prediction: Positive if the Bayesian score is above the estimated best cutoff value from minimizing the false positive and false negative rate.

Probability: The estimated probability that the sample is in the positive category. This assumes that the Bayesian score follows a normal distribution and is different from the prediction using a cutoff.

Enrichment: An estimate of enrichment, that is, the increased likelihood (versus random) of this sample being in the category.

Bayesian Score: The standard Laplacian-modified Bayesian score.

Mahalanobis Distance: The Mahalanobis distance (MD) is the distance to the center of the training data. The larger the MD, the less trustworthy the prediction.

Mahalanobis Distance p-value: The p-value gives the fraction of training data with an MD greater than or equal to the one for the given sample, assuming normally distributed data. The smaller the p-value, the less trustworthy the prediction. For highly non-normal X properties (e.g., fingerprints), the MD p-value is wildly inaccurate.

**Structural Similar Compounds**

| Name               | Indapamide                                                          | Niclosamide                                                         | Metolazone                                                          |
|--------------------|---------------------------------------------------------------------|---------------------------------------------------------------------|---------------------------------------------------------------------|
| Structure          |                                                                     |                                                                     |                                                                     |
| Actual Endpoint    | Non-Carcinogen                                                      | Non-Carcinogen                                                      | Non-Carcinogen                                                      |
| Predicted Endpoint | Non-Carcinogen                                                      | Non-Carcinogen                                                      | Non-Carcinogen                                                      |
| Distance           | 0.584                                                               | 0.590                                                               | 0.609                                                               |
| Reference          | US FDA (Centre for Drug Eval.& Res./Off. Testing & Res.) Sept. 1997 | US FDA (Centre for Drug Eval.& Res./Off. Testing & Res.) Sept. 1997 | US FDA (Centre for Drug Eval.& Res./Off. Testing & Res.) Sept. 1997 |

**Model Applicability**

Unknown features are fingerprint features in the query molecule, but not found or appearing too infrequently in the training set.

1. All properties and OPS components are within expected ranges.

**Feature Contribution****Top features for positive contribution**

| Fingerprint | Bit/Smiles | Feature Structure                                      | Score | Carcinogen in training set |
|-------------|------------|--------------------------------------------------------|-------|----------------------------|
| FCFP_6      | 1441604640 | <p>AND Enantiomer</p> <p>[*]:[c]1:[*]C[C@@H](C)CC1</p> | 0.77  | 4 out of 5                 |



|                                               |                   |                                                                                                                                                                                           |              |                                   |
|-----------------------------------------------|-------------------|-------------------------------------------------------------------------------------------------------------------------------------------------------------------------------------------|--------------|-----------------------------------|
| FCFP_6                                        | -773983804        | <p>AND Enantiomer</p> 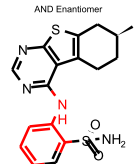 <p>[*]N[c]1:[cH]:[*]:[c]<br/>([*]):[cH]:[cH]:1</p>                              | 0.409        | 10 out of 24                      |
| FCFP_6                                        | -1043339860       | <p>AND Enantiomer</p>  <p>[*]CC(C)C[*]</p>                                                             | 0.383        | 24 out of 61                      |
| <b>Top Features for negative contribution</b> |                   |                                                                                                                                                                                           |              |                                   |
| <b>Fingerprint</b>                            | <b>Bit/Smiles</b> | <b>Feature Structure</b>                                                                                                                                                                  | <b>Score</b> | <b>Carcinogen in training set</b> |
| FCFP_6                                        | -124685461        | <p>AND Enantiomer</p>  <p>[*]:n:[cH]:n:[*]</p>                                                         | -0.731       | 1 out of 12                       |
| FCFP_6                                        | 1293778554        | <p>AND Enantiomer</p>  <p>[*]:[c](:[*])N[c](:[*]<br/>):[*]</p>                                        | -0.719       | 0 out of 4                        |
| FCFP_6                                        | -103236997        | <p>AND Enantiomer</p>  <p>[*]S(=[*])(=[*])[c]1:<br/>[cH]:[cH]:[cH]:[cH]:<br/>[c]:1N[c](:[*]):[*]</p> | -0.582       | 0 out of 3                        |

9b

TOPKAT\_Mouse\_Male\_FDA\_None\_vs\_Carcinogen

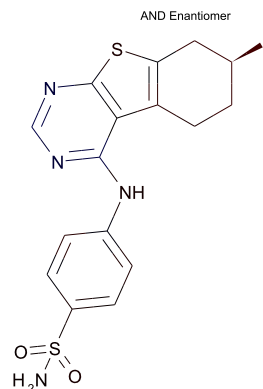C<sub>17</sub>H<sub>18</sub>N<sub>4</sub>O<sub>2</sub>S<sub>2</sub>

Molecular Weight: 374.48042

ALogP: 3.541

Rotatable Bonds: 3

Acceptors: 5

Donors: 2

**Model Prediction****Prediction: Carcinogen**

Probability: 0.321

Enrichment: 1.09

Bayesian Score: 0.528

Mahalanobis Distance: 14.5

Mahalanobis Distance p-value: 7.14e-007

Prediction: Positive if the Bayesian score is above the estimated best cutoff value from minimizing the false positive and false negative rate.

Probability: The estimated probability that the sample is in the positive category. This assumes that the Bayesian score follows a normal distribution and is different from the prediction using a cutoff.

Enrichment: An estimate of enrichment, that is, the increased likelihood (versus random) of this sample being in the category.

Bayesian Score: The standard Laplacian-modified Bayesian score.

Mahalanobis Distance: The Mahalanobis distance (MD) is the distance to the center of the training data. The larger the MD, the less trustworthy the prediction.

Mahalanobis Distance p-value: The p-value gives the fraction of training data with an MD greater than or equal to the one for the given sample, assuming normally distributed data. The smaller the p-value, the less trustworthy the prediction. For highly non-normal X properties (e.g., fingerprints), the MD p-value is wildly inaccurate.

**Structural Similar Compounds**

| Name               | Niclosamide                                                         | Indapamide                                                          | Metolazone                                                          |
|--------------------|---------------------------------------------------------------------|---------------------------------------------------------------------|---------------------------------------------------------------------|
| Structure          |                                                                     |                                                                     |                                                                     |
| Actual Endpoint    | Non-Carcinogen                                                      | Non-Carcinogen                                                      | Non-Carcinogen                                                      |
| Predicted Endpoint | Non-Carcinogen                                                      | Non-Carcinogen                                                      | Non-Carcinogen                                                      |
| Distance           | 0.588                                                               | 0.593                                                               | 0.618                                                               |
| Reference          | US FDA (Centre for Drug Eval.& Res./Off. Testing & Res.) Sept. 1997 | US FDA (Centre for Drug Eval.& Res./Off. Testing & Res.) Sept. 1997 | US FDA (Centre for Drug Eval.& Res./Off. Testing & Res.) Sept. 1997 |

**Model Applicability**

Unknown features are fingerprint features in the query molecule, but not found or appearing too infrequently in the training set.

- OPS PC19 out of range. Value: -2.8409. Training min, max, SD, explained variance: -2.8152, 4.6113, 1.185, 0.0147.
- OPS PC30 out of range. Value: -2.7012. Training min, max, SD, explained variance: -2.5648, 3.3898, 0.9347, 0.0092.

**Feature Contribution****Top features for positive contribution**

| Fingerprint | Bit/Smiles  | Feature Structure                        | Score | Carcinogen in training set |
|-------------|-------------|------------------------------------------|-------|----------------------------|
| FCFP_6      | -1441604640 | <br><chem>[*][c]1[*]C[C@@H](C)CC1</chem> | 0.77  | 4 out of 5                 |

|                                               |                   |                                                                                                                                                              |              |                                   |
|-----------------------------------------------|-------------------|--------------------------------------------------------------------------------------------------------------------------------------------------------------|--------------|-----------------------------------|
| FCFP_6                                        | -773983804        | <p>AND Enantiomer</p> 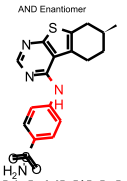 <p>[*]N[c]1:[cH]:[*]:[c]<br/>([*]):[cH]:[cH]:1</p> | 0.409        | 10 out of 24                      |
| FCFP_6                                        | -1043339860       | <p>AND Enantiomer</p>  <p>[*]CC(C)C[*]</p>                                | 0.383        | 24 out of 61                      |
| <b>Top Features for negative contribution</b> |                   |                                                                                                                                                              |              |                                   |
| <b>Fingerprint</b>                            | <b>Bit/Smiles</b> | <b>Feature Structure</b>                                                                                                                                     | <b>Score</b> | <b>Carcinogen in training set</b> |
| FCFP_6                                        | -124685461        | <p>AND Enantiomer</p>  <p>[*]:n:[cH]:n:[*]</p>                            | -0.731       | 1 out of 12                       |
| FCFP_6                                        | 1293778554        | <p>AND Enantiomer</p>  <p>[*]:[c](:[*])N[c](:[*]<br/>):[*]</p>           | -0.719       | 0 out of 4                        |
| FCFP_6                                        | -475316933        | <p>AND Enantiomer</p>  <p>[*][c]1:[*]:[c](:[*])<br/>:n:[cH]:n:1</p>     | -0.423       | 0 out of 2                        |

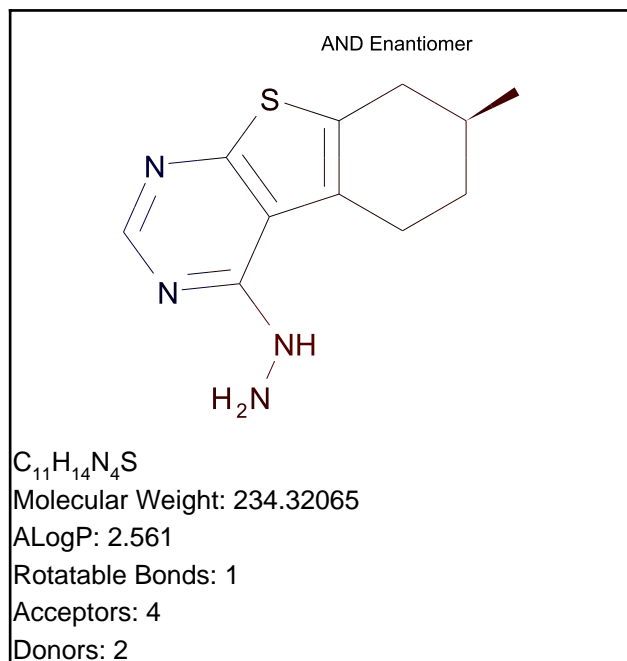

### Model Prediction

Prediction: **Carcinogen**

Probability: 0.387

Enrichment: 1.32

Bayesian Score: 2.64

Mahalanobis Distance: 14.1

Mahalanobis Distance p-value: 4.16e-006

Prediction: Positive if the Bayesian score is above the estimated best cutoff value from minimizing the false positive and false negative rate.

Probability: The estimated probability that the sample is in the positive category. This assumes that the Bayesian score follows a normal distribution and is different from the prediction using a cutoff.

Enrichment: An estimate of enrichment, that is, the increased likelihood (versus random) of this sample being in the category.

Bayesian Score: The standard Laplacian-modified Bayesian score.

Mahalanobis Distance: The Mahalanobis distance (MD) is the distance to the center of the training data. The larger the MD, the less trustworthy the prediction.

Mahalanobis Distance p-value: The p-value gives the fraction of training data with an MD greater than or equal to the one for the given sample, assuming normally distributed data. The smaller the p-value, the less trustworthy the prediction. For highly non-normal X properties (e.g., fingerprints), the MD p-value is wildly inaccurate.

### Structural Similar Compounds

| Name               | Lamotrigine                                                                         | Danthron                                                                            | Phenazopyridine                                                                     |
|--------------------|-------------------------------------------------------------------------------------|-------------------------------------------------------------------------------------|-------------------------------------------------------------------------------------|
| Structure          | 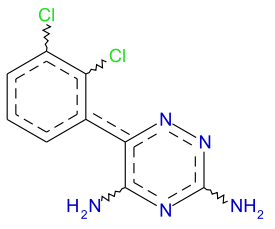 |  |  |
| Actual Endpoint    | Non-Carcinogen                                                                      | Carcinogen                                                                          | Non-Carcinogen                                                                      |
| Predicted Endpoint | Non-Carcinogen                                                                      | Carcinogen                                                                          | Carcinogen                                                                          |
| Distance           | 0.561                                                                               | 0.572                                                                               | 0.574                                                                               |
| Reference          | US FDA (Centre for Drug Eval.& Res./Off. Testing & Res.) Sept. 1997                 | US FDA (Centre for Drug Eval.& Res./Off. Testing & Res.) Sept. 1997                 | US FDA (Centre for Drug Eval.& Res./Off. Testing & Res.) Sept. 1997                 |

### Model Applicability

Unknown features are fingerprint features in the query molecule, but not found or appearing too infrequently in the training set.

- All properties and OPS components are within expected ranges.

### Feature Contribution

#### Top features for positive contribution

| Fingerprint | Bit/Smiles | Feature Structure                                                                                                                             | Score | Carcinogen in training set |
|-------------|------------|-----------------------------------------------------------------------------------------------------------------------------------------------|-------|----------------------------|
| FCFP_6      | 1441604640 | <p>AND Enantiomer</p> 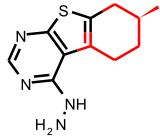 <p>[*]:[c]1[*]:[C]C@@H](C)CC1</p> | 0.77  | 4 out of 5                 |

|                                               |                   |                                                                                                                                                         |              |                                   |
|-----------------------------------------------|-------------------|---------------------------------------------------------------------------------------------------------------------------------------------------------|--------------|-----------------------------------|
| FCFP_6                                        | 1294344583        | <p>AND Enantiomer</p> 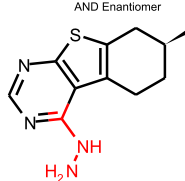 <p>[*]NN[c](:[*]):[*]</p>                     | 0.517        | 2 out of 3                        |
| FCFP_6                                        | -1043339860       | <p>AND Enantiomer</p>  <p>[*]CC(C)C[*]</p>                           | 0.383        | 24 out of 61                      |
| <b>Top Features for negative contribution</b> |                   |                                                                                                                                                         |              |                                   |
| <b>Fingerprint</b>                            | <b>Bit/Smiles</b> | <b>Feature Structure</b>                                                                                                                                | <b>Score</b> | <b>Carcinogen in training set</b> |
| FCFP_6                                        | -124685461        | <p>AND Enantiomer</p>  <p>[*]:n:[cH]:n:[*]</p>                       | -0.731       | 1 out of 12                       |
| FCFP_6                                        | -475316933        | <p>AND Enantiomer</p>  <p>[*][c]1:[*]:[c](:[*])<br/>:n:[cH]:n:1</p> | -0.423       | 0 out of 2                        |
| FCFP_6                                        | 907007053         | <p>AND Enantiomer</p>  <p>[*]C([*])C[c](:[*]):[*]</p>              | -0.366       | 11 out of 62                      |

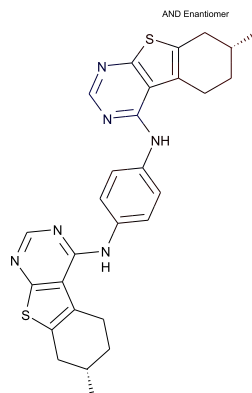

$C_{28}H_{28}N_6S_2$

Molecular Weight: 512.69212

ALogP: 7.842

Rotatable Bonds: 4

Acceptors: 6

Donors: 2

## Model Prediction

Prediction: **Carcinogen**

Probability: 0.286

Enrichment: 0.971

Bayesian Score: -0.759

Mahalanobis Distance: 15.5

Mahalanobis Distance p-value: 1.06e-008

Prediction: Positive if the Bayesian score is above the estimated best cutoff value from minimizing the false positive and false negative rate.

Probability: The estimated probability that the sample is in the positive category. This assumes that the Bayesian score follows a normal distribution and is different from the prediction using a cutoff.

Enrichment: An estimate of enrichment, that is, the increased likelihood (versus random) of this sample being in the category.

Bayesian Score: The standard Laplacian-modified Bayesian score.

Mahalanobis Distance: The Mahalanobis distance (MD) is the distance to the center of the training data. The larger the MD, the less trustworthy the prediction.

Mahalanobis Distance p-value: The p-value gives the fraction of training data with an MD greater than or equal to the one for the given sample, assuming normally distributed data. The smaller the p-value, the less trustworthy the prediction. For highly non-normal X properties (e.g., fingerprints), the MD p-value is wildly inaccurate.

## Structural Similar Compounds

| Name               | Emetine                                                             | Fluticasone                                                         | Bromocriptine                                                       |
|--------------------|---------------------------------------------------------------------|---------------------------------------------------------------------|---------------------------------------------------------------------|
| Structure          |                                                                     |                                                                     |                                                                     |
| Actual Endpoint    | Non-Carcinogen                                                      | Non-Carcinogen                                                      | Non-Carcinogen                                                      |
| Predicted Endpoint | Non-Carcinogen                                                      | Carcinogen                                                          | Non-Carcinogen                                                      |
| Distance           | 0.875                                                               | 0.879                                                               | 0.906                                                               |
| Reference          | US FDA (Centre for Drug Eval.& Res./Off. Testing & Res.) Sept. 1997 | US FDA (Centre for Drug Eval.& Res./Off. Testing & Res.) Sept. 1997 | US FDA (Centre for Drug Eval.& Res./Off. Testing & Res.) Sept. 1997 |

## Model Applicability

Unknown features are fingerprint features in the query molecule, but not found or appearing too infrequently in the training set.

1. OPS PC19 out of range. Value: -3.2042. Training min, max, SD, explained variance: -2.8152, 4.6113, 1.185, 0.0147.

## Feature Contribution

### Top features for positive contribution

| Fingerprint | Bit/Smiles  | Feature Structure                         | Score | Carcinogen in training set |
|-------------|-------------|-------------------------------------------|-------|----------------------------|
| FCFP_6      | -1441604640 | <br><chem>[*]:[*]1:[*]C[C@H](C)CC1</chem> | 0.77  | 4 out of 5                 |

| FCFP_6                                        | -773983804  | <p>AND Enantiomer</p> 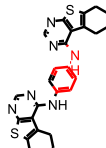 <p>[*]N[c]1:[cH]:[*]:[c]<br/>([*]):[cH]:[cH]:1</p> | 0.409  | 10 out of 24               |
|-----------------------------------------------|-------------|--------------------------------------------------------------------------------------------------------------------------------------------------------------|--------|----------------------------|
| FCFP_6                                        | -1043339860 | <p>AND Enantiomer</p>  <p>[*]CC(C)C[*]</p>                                | 0.383  | 24 out of 61               |
| <b>Top Features for negative contribution</b> |             |                                                                                                                                                              |        |                            |
| Fingerprint                                   | Bit/Smiles  | Feature Structure                                                                                                                                            | Score  | Carcinogen in training set |
| FCFP_6                                        | -124685461  | <p>AND Enantiomer</p>  <p>[*]:n:[cH]:n:[*]</p>                            | -0.731 | 1 out of 12                |
| FCFP_6                                        | 1293778554  | <p>AND Enantiomer</p>  <p>[*]:[c]:[*])N[c]:[*]<br/>):[*]</p>             | -0.719 | 0 out of 4                 |
| FCFP_6                                        | -475316933  | <p>AND Enantiomer</p>  <p>[*][c]1:[*]:[c]:[*]<br/>:n:[cH]:n:1</p>       | -0.423 | 0 out of 2                 |

# Erlotinib

# TOPKAT\_Mouse\_Male\_FDA\_None\_vs\_Carcinogen

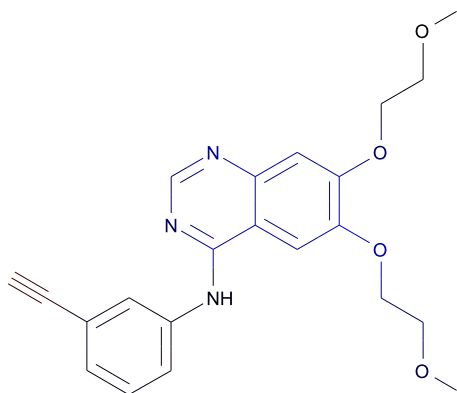

$C_{22}H_{23}N_3O_4$

Molecular Weight: 393.43572

ALogP: 4.309

Rotatable Bonds: 10

Acceptors: 7

Donors: 1

## Model Prediction

Prediction: Non-Carcinogen

Probability: 0.181

Enrichment: 0.614

Bayesian Score: -6.29

Mahalanobis Distance: 16

Mahalanobis Distance p-value: 1.07e-009

Prediction: Positive if the Bayesian score is above the estimated best cutoff value from minimizing the false positive and false negative rate.

Probability: The estimated probability that the sample is in the positive category. This assumes that the Bayesian score follows a normal distribution and is different from the prediction using a cutoff.

Enrichment: An estimate of enrichment, that is, the increased likelihood (versus random) of this sample being in the category.

Bayesian Score: The standard Laplacian-modified Bayesian score.

Mahalanobis Distance: The Mahalanobis distance (MD) is the distance to the center of the training data. The larger the MD, the less trustworthy the prediction.

Mahalanobis Distance p-value: The p-value gives the fraction of training data with an MD greater than or equal to the one for the given sample, assuming normally distributed data. The smaller the p-value, the less trustworthy the prediction. For highly non-normal X properties (e.g., fingerprints), the MD p-value is wildly inaccurate.

## Structural Similar Compounds

| Name               | Mycophenolate                                                                       | Nicardipine                                                                         | Nimodipine                                                                          |
|--------------------|-------------------------------------------------------------------------------------|-------------------------------------------------------------------------------------|-------------------------------------------------------------------------------------|
| Structure          | 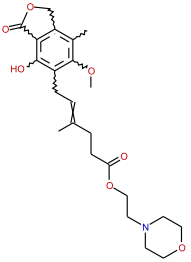 |  |  |
| Actual Endpoint    | Non-Carcinogen                                                                      | Non-Carcinogen                                                                      | Non-Carcinogen                                                                      |
| Predicted Endpoint | Non-Carcinogen                                                                      | Non-Carcinogen                                                                      | Non-Carcinogen                                                                      |
| Distance           | 0.615                                                                               | 0.655                                                                               | 0.668                                                                               |
| Reference          | US FDA (Centre for Drug Eval.& Res./Off. Testing & Res.) Sept. 1997                 | US FDA (Centre for Drug Eval.& Res./Off. Testing & Res.) Sept. 1997                 | US FDA (Centre for Drug Eval.& Res./Off. Testing & Res.) Sept. 1997                 |

## Model Applicability

Unknown features are fingerprint features in the query molecule, but not found or appearing too infrequently in the training set.

1. All properties and OPS components are within expected ranges.
2. Unknown FCFP\_2 feature: 902193919: [\*]:c[:(\*)]C#C

## Feature Contribution

### Top features for positive contribution

| Fingerprint | Bit/Smiles | Feature Structure                                                                               | Score | Carcinogen in training set |
|-------------|------------|-------------------------------------------------------------------------------------------------|-------|----------------------------|
| FCFP_6      | 131784192  | 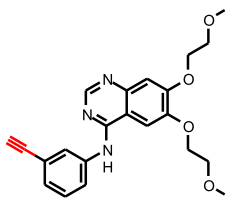<br>[*]C#C | 0.983 | 8 out of 9                 |



|                                               |                   |                                                                                                                                                           |              |                                   |
|-----------------------------------------------|-------------------|-----------------------------------------------------------------------------------------------------------------------------------------------------------|--------------|-----------------------------------|
| FCFP_6                                        | -773983804        | 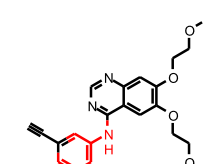<br>[*]N[c]1:[cH]:[*]:[c]<br>([*]):[cH]:[cH]:1                          | 0.409        | 10 out of 24                      |
| FCFP_6                                        | -771557733        | <br>[*]N[c]1:[cH]:[*]:[cH]<br>]:[c](:[cH]:1)C#[*]                      | 0.38         | 2 out of 4                        |
| <b>Top Features for negative contribution</b> |                   |                                                                                                                                                           |              |                                   |
| <b>Fingerprint</b>                            | <b>Bit/Smiles</b> | <b>Feature Structure</b>                                                                                                                                  | <b>Score</b> | <b>Carcinogen in training set</b> |
| FCFP_6                                        | -124685461        | <br>[*]:n:[cH]:n:[*]                                                   | -0.731       | 1 out of 12                       |
| FCFP_6                                        | 1674955425        | <br>[*]O[c]1:[cH]:[c](:[c]<br>):([*]):[*]):[c](:[*]<br>):[*]:[c]:1[*] | -0.719       | 0 out of 4                        |
| FCFP_6                                        | 1293778554        | <br>[*]:[c](:[*])N[c](:[*]<br>):[*]                                  | -0.719       | 0 out of 4                        |

5a

## TOPKAT\_Mouse\_Male\_FDA\_Single\_vs\_Multiple

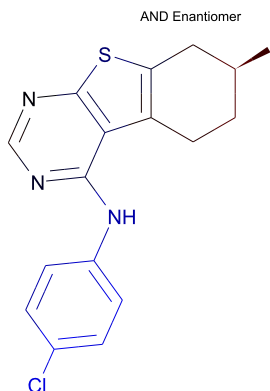C<sub>17</sub>H<sub>16</sub>ClN<sub>3</sub>S

Molecular Weight: 329.84704

ALogP: 5.5

Rotatable Bonds: 2

Acceptors: 3

Donors: 1

**Model Prediction**

Prediction: Single-Carcinogen

Probability: 0.146

Enrichment: 0.486

Bayesian Score: -8.59

Mahalanobis Distance: 15.7

Mahalanobis Distance p-value: 7.7e-007

Prediction: Positive if the Bayesian score is above the estimated best cutoff value from minimizing the false positive and false negative rate.

Probability: The estimated probability that the sample is in the positive category. This assumes that the Bayesian score follows a normal distribution and is different from the prediction using a cutoff.

Enrichment: An estimate of enrichment, that is, the increased likelihood (versus random) of this sample being in the category.

Bayesian Score: The standard Laplacian-modified Bayesian score.

Mahalanobis Distance: The Mahalanobis distance (MD) is the distance to the center of the training data. The larger the MD, the less trustworthy the prediction.

Mahalanobis Distance p-value: The p-value gives the fraction of training data with an MD greater than or equal to the one for the given sample, assuming normally distributed data. The smaller the p-value, the less trustworthy the prediction. For highly non-normal X properties (e.g., fingerprints), the MD p-value is wildly inaccurate.

**Structural Similar Compounds**

| Name               | Nafenopin                                                           | Mestranol                                                           | Levonorgestrel                                                      |
|--------------------|---------------------------------------------------------------------|---------------------------------------------------------------------|---------------------------------------------------------------------|
| Structure          |                                                                     |                                                                     |                                                                     |
| Actual Endpoint    | Single-Carcinogen                                                   | Multiple-Carcinogen                                                 | Single-Carcinogen                                                   |
| Predicted Endpoint | Single-Carcinogen                                                   | Multiple-Carcinogen                                                 | Multiple-Carcinogen                                                 |
| Distance           | 0.638                                                               | 0.659                                                               | 0.663                                                               |
| Reference          | US FDA (Centre for Drug Eval.& Res./Off. Testing & Res.) Sept. 1997 | US FDA (Centre for Drug Eval.& Res./Off. Testing & Res.) Sept. 1997 | US FDA (Centre for Drug Eval.& Res./Off. Testing & Res.) Sept. 1997 |

**Model Applicability**

Unknown features are fingerprint features in the query molecule, but not found or appearing too infrequently in the training set.

- OPS PC7 out of range. Value: -5.152. Training min, max, SD, explained variance: -3.9478, 3.0766, 1.527, 0.0435.
- Unknown FCFP\_2 feature: 1293778554: [\*]:c(:[\*])N[c(:[\*]):[\*]]

**Feature Contribution****Top features for positive contribution**

| Fingerprint | Bit/Smiles  | Feature Structure                    | Score | Multiple-Carcinogen in training set |
|-------------|-------------|--------------------------------------|-------|-------------------------------------|
| FCFP_12     | -1441604640 | <br><chem>*:c1:*c(c@@H)(C)CC1</chem> | 0.75  | 4 out of 4                          |

|                                               |                   |                                                                                                                                                                       |              |                                            |
|-----------------------------------------------|-------------------|-----------------------------------------------------------------------------------------------------------------------------------------------------------------------|--------------|--------------------------------------------|
| FCFP_12                                       | -2002183168       | <p>AND Enantiomer</p> 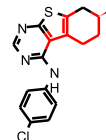 <p><chem>[*]C@@H1[*][c]2[*]:[*]c(c[*])[c]:2CC1</chem></p>   | 0.616        | 4 out of 5                                 |
| FCFP_12                                       | -124685461        | <p>AND Enantiomer</p>  <p><chem>[*]:n:[cH]:n:[*]</chem></p>                        | 0.4          | 1 out of 1                                 |
| <b>Top Features for negative contribution</b> |                   |                                                                                                                                                                       |              |                                            |
| <b>Fingerprint</b>                            | <b>Bit/Smiles</b> | <b>Feature Structure</b>                                                                                                                                              | <b>Score</b> | <b>Multiple-Carcinogen in training set</b> |
| FCFP_12                                       | -1151884458       | <p>AND Enantiomer</p>  <p><chem>[*]N[c](:n:[*]):[c](:[*]):[*]</chem></p>           | -1.11        | 0 out of 6                                 |
| FCFP_12                                       | 590925877         | <p>AND Enantiomer</p>  <p><chem>[*]N[c](:[cH]:[*]):[cH]:[*]</chem></p>           | -0.998       | 1 out of 13                                |
| FCFP_12                                       | -1508180856       | <p>AND Enantiomer</p>  <p><chem>[*][c]1:[cH]:[cH]:[c](Cl):[cH]:[cH]:1</chem></p> | -0.859       | 0 out of 4                                 |



5b

TOPKAT\_Mouse\_Male\_FDA\_Single\_vs\_Multiple

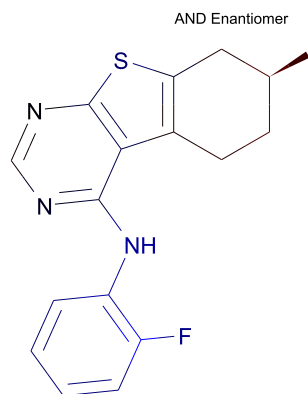C<sub>17</sub>H<sub>16</sub>FN<sub>3</sub>S

Molecular Weight: 313.39244

ALogP: 5.041

Rotatable Bonds: 2

Acceptors: 3

Donors: 1

**Model Prediction**

Prediction: Single-Carcinogen

Probability: 0.152

Enrichment: 0.505

Bayesian Score: -6.97

Mahalanobis Distance: 18.1

Mahalanobis Distance p-value: 9.82e-009

Prediction: Positive if the Bayesian score is above the estimated best cutoff value from minimizing the false positive and false negative rate.

Probability: The estimated probability that the sample is in the positive category. This assumes that the Bayesian score follows a normal distribution and is different from the prediction using a cutoff.

Enrichment: An estimate of enrichment, that is, the increased likelihood (versus random) of this sample being in the category.

Bayesian Score: The standard Laplacian-modified Bayesian score.

Mahalanobis Distance: The Mahalanobis distance (MD) is the distance to the center of the training data. The larger the MD, the less trustworthy the prediction.

Mahalanobis Distance p-value: The p-value gives the fraction of training data with an MD greater than or equal to the one for the given sample, assuming normally distributed data. The smaller the p-value, the less trustworthy the prediction. For highly non-normal X properties (e.g., fingerprints), the MD p-value is wildly inaccurate.

**Structural Similar Compounds**

| Name               | Nafenopin                                                           | Levonorgestrel                                                      | Mestranol                                                           |
|--------------------|---------------------------------------------------------------------|---------------------------------------------------------------------|---------------------------------------------------------------------|
| Structure          |                                                                     |                                                                     |                                                                     |
| Actual Endpoint    | Single-Carcinogen                                                   | Single-Carcinogen                                                   | Multiple-Carcinogen                                                 |
| Predicted Endpoint | Single-Carcinogen                                                   | Multiple-Carcinogen                                                 | Multiple-Carcinogen                                                 |
| Distance           | 0.627                                                               | 0.656                                                               | 0.658                                                               |
| Reference          | US FDA (Centre for Drug Eval.& Res./Off. Testing & Res.) Sept. 1997 | US FDA (Centre for Drug Eval.& Res./Off. Testing & Res.) Sept. 1997 | US FDA (Centre for Drug Eval.& Res./Off. Testing & Res.) Sept. 1997 |

**Model Applicability**

Unknown features are fingerprint features in the query molecule, but not found or appearing too infrequently in the training set.

- OPS PC7 out of range. Value: -4.7493. Training min, max, SD, explained variance: -3.9478, 3.0766, 1.527, 0.0435.
- Unknown FCFP\_2 feature: 1293778554: [\*]:c[:[\*]]N[c[:[\*]]:[\*]]

**Feature Contribution****Top features for positive contribution**

| Fingerprint | Bit/Smiles  | Feature Structure                                      | Score | Multiple-Carcinogen in training set |
|-------------|-------------|--------------------------------------------------------|-------|-------------------------------------|
| FCFP_12     | -1441604640 | <p>AND Enantiomer</p> <p>[*]:c[:[*]]N[c[:[*]]:[*]]</p> | 0.75  | 4 out of 4                          |

|                                               |                   |                                                                                                                                                                        |              |                                            |
|-----------------------------------------------|-------------------|------------------------------------------------------------------------------------------------------------------------------------------------------------------------|--------------|--------------------------------------------|
| FCFP_12                                       | -2002183168       | <p>AND Enantiomer</p>  <p><chem>[*]C@@H1[*]c2[*]:[*]c(c[*])c:2</chem><br/>CC1</p>   | 0.616        | 4 out of 5                                 |
| FCFP_12                                       | -124685461        | <p>AND Enantiomer</p>  <p><chem>[*]:n:[cH]:n:[*]</chem></p>                         | 0.4          | 1 out of 1                                 |
| <b>Top Features for negative contribution</b> |                   |                                                                                                                                                                        |              |                                            |
| <b>Fingerprint</b>                            | <b>Bit/Smiles</b> | <b>Feature Structure</b>                                                                                                                                               | <b>Score</b> | <b>Multiple-Carcinogen in training set</b> |
| FCFP_12                                       | -1151884458       | <p>AND Enantiomer</p>  <p><chem>[*]N[c](:n:[*]):[c](:[*]):[*]</chem></p>            | -1.11        | 0 out of 6                                 |
| FCFP_12                                       | 590925877         | <p>AND Enantiomer</p>  <p><chem>[*]N[c](:[cH]:[*]):[cH]:[*]</chem></p>            | -0.998       | 1 out of 13                                |
| FCFP_12                                       | -773983804        | <p>AND Enantiomer</p>  <p><chem>[*]N[c]1:[cH]:[*]:[c]([*]):[cH]:[cH]:1</chem></p> | -0.789       | 1 out of 10                                |



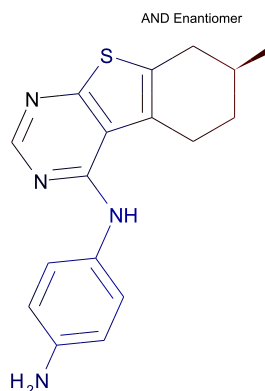

$C_{17}H_{18}N_4S$

Molecular Weight: 310.41662

ALogP: 4.089

Rotatable Bonds: 2

Acceptors: 4

Donors: 2

## Model Prediction

Prediction: Single-Carcinogen

Probability: 0.163

Enrichment: 0.54

Bayesian Score: -5.43

Mahalanobis Distance: 12.7

Mahalanobis Distance p-value: 0.000159

Prediction: Positive if the Bayesian score is above the estimated best cutoff value from minimizing the false positive and false negative rate.

Probability: The estimated probability that the sample is in the positive category. This assumes that the Bayesian score follows a normal distribution and is different from the prediction using a cutoff.

Enrichment: An estimate of enrichment, that is, the increased likelihood (versus random) of this sample being in the category.

Bayesian Score: The standard Laplacian-modified Bayesian score.

Mahalanobis Distance: The Mahalanobis distance (MD) is the distance to the center of the training data. The larger the MD, the less trustworthy the prediction.

Mahalanobis Distance p-value: The p-value gives the fraction of training data with an MD greater than or equal to the one for the given sample, assuming normally distributed data. The smaller the p-value, the less trustworthy the prediction. For highly non-normal X properties (e.g., fingerprints), the MD p-value is wildly inaccurate.

## Structural Similar Compounds

| Name               | Phenolphthalein                                                     | Oxazepam                                                            | Danthron                                                            |
|--------------------|---------------------------------------------------------------------|---------------------------------------------------------------------|---------------------------------------------------------------------|
| Structure          |                                                                     |                                                                     |                                                                     |
| Actual Endpoint    | Multiple-Carcinogen                                                 | Single-Carcinogen                                                   | Single-Carcinogen                                                   |
| Predicted Endpoint | Multiple-Carcinogen                                                 | Single-Carcinogen                                                   | Single-Carcinogen                                                   |
| Distance           | 0.573                                                               | 0.658                                                               | 0.721                                                               |
| Reference          | US FDA (Centre for Drug Eval.& Res./Off. Testing & Res.) Sept. 1997 | US FDA (Centre for Drug Eval.& Res./Off. Testing & Res.) Sept. 1997 | US FDA (Centre for Drug Eval.& Res./Off. Testing & Res.) Sept. 1997 |

## Model Applicability

Unknown features are fingerprint features in the query molecule, but not found or appearing too infrequently in the training set.

1. All properties and OPS components are within expected ranges.
2. Unknown FCFP\_2 feature: 1293778554: [\*]:[c](:[\*])N[c](:[\*]):[\*]

## Feature Contribution

### Top features for positive contribution

| Fingerprint | Bit/Smiles | Feature Structure | Score | Multiple-Carcinogen in training set |
|-------------|------------|-------------------|-------|-------------------------------------|
| FCFP_12     | 1441604640 |                   | 0.75  | 4 out of 4                          |



|                                               |                   |                                                                                                                                                                 |              |                                            |
|-----------------------------------------------|-------------------|-----------------------------------------------------------------------------------------------------------------------------------------------------------------|--------------|--------------------------------------------|
| FCFP_12                                       | -2002183168       | <p>AND Enantiomer</p> 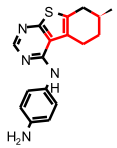 <p><chem>[*]C@@H1[*]c2[*]:[*]c(c[*])c:2CC1</chem></p> | 0.616        | 4 out of 5                                 |
| FCFP_12                                       | -124685461        | <p>AND Enantiomer</p>  <p><chem>[*]:n:[cH]:n:[*]</chem></p>                  | 0.4          | 1 out of 1                                 |
| <b>Top Features for negative contribution</b> |                   |                                                                                                                                                                 |              |                                            |
| <b>Fingerprint</b>                            | <b>Bit/Smiles</b> | <b>Feature Structure</b>                                                                                                                                        | <b>Score</b> | <b>Multiple-Carcinogen in training set</b> |
| FCFP_12                                       | 1069584379        | <p>AND Enantiomer</p>  <p><chem>[*]:c(:[*])N</chem></p>                      | -1.11        | 0 out of 6                                 |
| FCFP_12                                       | -1151884458       | <p>AND Enantiomer</p>  <p><chem>[*]N[c](:n:[*]):c(:[*]):[*]</chem></p>     | -1.11        | 0 out of 6                                 |
| FCFP_12                                       | 590925877         | <p>AND Enantiomer</p>  <p><chem>[*]N[c](:[cH]:[*]):[cH]:[*]</chem></p>     | -0.998       | 1 out of 13                                |



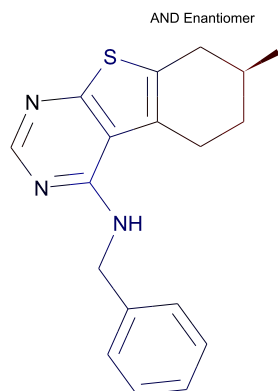

$C_{18}H_{19}N_3S$

Molecular Weight: 309.42856

ALogP: 4.678

Rotatable Bonds: 3

Acceptors: 3

Donors: 1

## Model Prediction

**Prediction: Multiple-Carcinogen**

Probability: 0.169

Enrichment: 0.563

Bayesian Score: -4.74

Mahalanobis Distance: 12.2

Mahalanobis Distance p-value: 0.000442

Prediction: Positive if the Bayesian score is above the estimated best cutoff value from minimizing the false positive and false negative rate.

Probability: The estimated probability that the sample is in the positive category. This assumes that the Bayesian score follows a normal distribution and is different from the prediction using a cutoff.

Enrichment: An estimate of enrichment, that is, the increased likelihood (versus random) of this sample being in the category.

Bayesian Score: The standard Laplacian-modified Bayesian score.

Mahalanobis Distance: The Mahalanobis distance (MD) is the distance to the center of the training data. The larger the MD, the less trustworthy the prediction.

Mahalanobis Distance p-value: The p-value gives the fraction of training data with an MD greater than or equal to the one for the given sample, assuming normally distributed data. The smaller the p-value, the less trustworthy the prediction. For highly non-normal X properties (e.g., fingerprints), the MD p-value is wildly inaccurate.

## Structural Similar Compounds

| Name               | Nafenopin                                                           | Oxaprocin                                                           | Suprofen                                                            |
|--------------------|---------------------------------------------------------------------|---------------------------------------------------------------------|---------------------------------------------------------------------|
| Structure          |                                                                     |                                                                     |                                                                     |
| Actual Endpoint    | Single-Carcinogen                                                   | Single-Carcinogen                                                   | Single-Carcinogen                                                   |
| Predicted Endpoint | Single-Carcinogen                                                   | Single-Carcinogen                                                   | Single-Carcinogen                                                   |
| Distance           | 0.566                                                               | 0.622                                                               | 0.665                                                               |
| Reference          | US FDA (Centre for Drug Eval.& Res./Off. Testing & Res.) Sept. 1997 | US FDA (Centre for Drug Eval.& Res./Off. Testing & Res.) Sept. 1997 | US FDA (Centre for Drug Eval.& Res./Off. Testing & Res.) Sept. 1997 |

## Model Applicability

Unknown features are fingerprint features in the query molecule, but not found or appearing too infrequently in the training set.

1. All properties and OPS components are within expected ranges.

## Feature Contribution

### Top features for positive contribution

| Fingerprint | Bit/Smiles  | Feature Structure                          | Score | Multiple-Carcinogen in training set |
|-------------|-------------|--------------------------------------------|-------|-------------------------------------|
| FCFP_12     | -1441604640 | <br><chem>[*]:[*]1:[*]C[C@@H](C)CC1</chem> | 0.75  | 4 out of 4                          |

|                                               |                   |                                                                                                                                                              |              |                                            |
|-----------------------------------------------|-------------------|--------------------------------------------------------------------------------------------------------------------------------------------------------------|--------------|--------------------------------------------|
| FCFP_12                                       | -2002183168       | <p>AND Enantiomer</p> 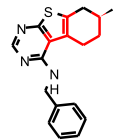 <p>[*]C@@H1[*]c2[*]<br/>:[*]c[*]c[*]c2<br/>CC1</p> | 0.616        | 4 out of 5                                 |
| FCFP_12                                       | 427906732         | <p>AND Enantiomer</p>  <p>[*]NC[c]1:[cH]:[cH]:[<br/>*]:[cH]:[cH]:1</p>    | 0.4          | 1 out of 1                                 |
| <b>Top Features for negative contribution</b> |                   |                                                                                                                                                              |              |                                            |
| <b>Fingerprint</b>                            | <b>Bit/Smiles</b> | <b>Feature Structure</b>                                                                                                                                     | <b>Score</b> | <b>Multiple-Carcinogen in training set</b> |
| FCFP_12                                       | 1294255210        | <p>AND Enantiomer</p>  <p>[*]CN[c]:[*]:[*]</p>                            | -1.63        | 0 out of 12                                |
| FCFP_12                                       | -1151884458       | <p>AND Enantiomer</p>  <p>[*]N[c]:n:[*]:[c]:<br/>[*]:[*]</p>            | -1.11        | 0 out of 6                                 |
| FCFP_12                                       | 991735244         | <p>AND Enantiomer</p>  <p>[*][c]1:[*]:[cH]:[cH]<br/>:[cH]:[cH]:1</p>    | -0.562       | 5 out of 28                                |



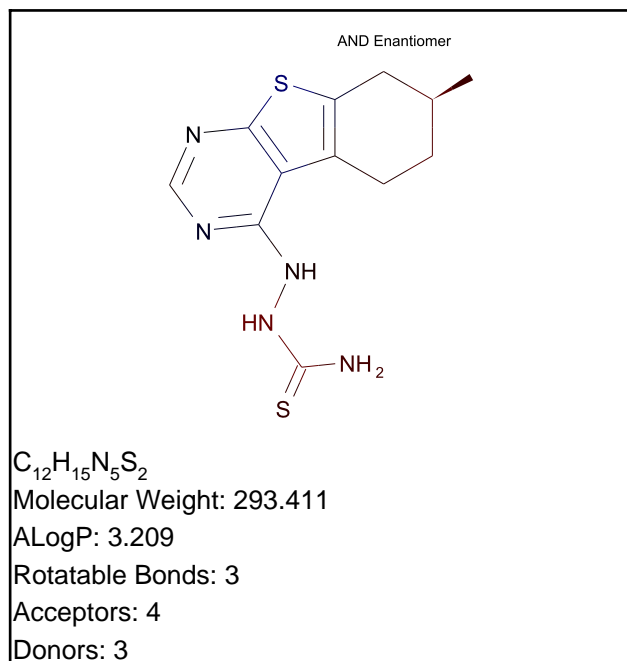

### Model Prediction

Prediction: Multiple-Carcinogen

Probability: 0.249

Enrichment: 0.828

Bayesian Score: -0.38

Mahalanobis Distance: 13.8

Mahalanobis Distance p-value: 2.12e-005

Prediction: Positive if the Bayesian score is above the estimated best cutoff value from minimizing the false positive and false negative rate.

Probability: The estimated probability that the sample is in the positive category. This assumes that the Bayesian score follows a normal distribution and is different from the prediction using a cutoff.

Enrichment: An estimate of enrichment, that is, the increased likelihood (versus random) of this sample being in the category.  
 Bayesian Score: The standard Laplacian-modified Bayesian score.

Mahalanobis Distance: The Mahalanobis distance (MD) is the distance to the center of the training data. The larger the MD, the less trustworthy the prediction.

Mahalanobis Distance p-value: The p-value gives the fraction of training data with an MD greater than or equal to the one for the given sample, assuming normally distributed data. The smaller the p-value, the less trustworthy the prediction. For highly non-normal X properties (e.g., fingerprints), the MD p-value is wildly inaccurate.

### Structural Similar Compounds

| Name               | Nithiazide                                                                          | Sulfamethazine                                                                      | Phenobarbital                                                                       |
|--------------------|-------------------------------------------------------------------------------------|-------------------------------------------------------------------------------------|-------------------------------------------------------------------------------------|
| Structure          | 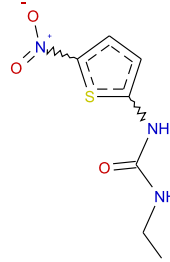 |  |  |
| Actual Endpoint    | Single-Carcinogen                                                                   | Single-Carcinogen                                                                   | Multiple-Carcinogen                                                                 |
| Predicted Endpoint | Single-Carcinogen                                                                   | Single-Carcinogen                                                                   | Multiple-Carcinogen                                                                 |
| Distance           | 0.757                                                                               | 0.771                                                                               | 0.799                                                                               |
| Reference          | US FDA (Centre for Drug Eval.& Res./Off. Testing & Res.) Sept. 1997                 | US FDA (Centre for Drug Eval.& Res./Off. Testing & Res.) Sept. 1997                 | US FDA (Centre for Drug Eval.& Res./Off. Testing & Res.) Sept. 1997                 |

### Model Applicability

Unknown features are fingerprint features in the query molecule, but not found or appearing too infrequently in the training set.

1. All properties and OPS components are within expected ranges.

### Feature Contribution

#### Top features for positive contribution

| Fingerprint | Bit/Smiles  | Feature Structure                                                                                                               | Score | Multiple-Carcinogen in training set |
|-------------|-------------|---------------------------------------------------------------------------------------------------------------------------------|-------|-------------------------------------|
| FCFP_12     | -1441604640 | 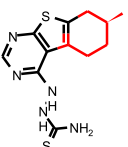<br><chem>[*]:[*]1:[*]C[C@@H](C)CC1</chem> | 0.75  | 4 out of 4                          |

|                                               |                   |                                                                                                                                                         |              |                                            |
|-----------------------------------------------|-------------------|---------------------------------------------------------------------------------------------------------------------------------------------------------|--------------|--------------------------------------------|
| FCFP_12                                       | -885461129        | <p>AND Enantiomer</p> 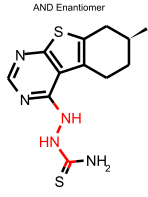 <p>[*]NNC(=[*])[*]</p>                        | 0.683        | 3 out of 3                                 |
| FCFP_12                                       | -2002183168       | <p>AND Enantiomer</p>  <p>[*]C@@H1[*]c2[*]<br/>[*]e[*]c2<br/>CC1</p> | 0.616        | 4 out of 5                                 |
| <b>Top Features for negative contribution</b> |                   |                                                                                                                                                         |              |                                            |
| <b>Fingerprint</b>                            | <b>Bit/Smiles</b> | <b>Feature Structure</b>                                                                                                                                | <b>Score</b> | <b>Multiple-Carcinogen in training set</b> |
| FCFP_12                                       | -1151884458       | <p>AND Enantiomer</p>  <p>[*]N[c]:n[*]:[c]:<br/>[*]:[*]</p>          | -1.11        | 0 out of 6                                 |
| FCFP_12                                       | 17                | <p>AND Enantiomer</p>  <p>[*]:s[*]</p>                             | -0.53        | 5 out of 27                                |
| FCFP_12                                       | -1564473960       | <p>AND Enantiomer</p>  <p>[*]:n[c]1:s[*]:[*]:<br/>[c]:1[*]</p>     | -0.519       | 0 out of 2                                 |





9a

## TOPKAT\_Mouse\_Male\_FDA\_Single\_vs\_Multiple

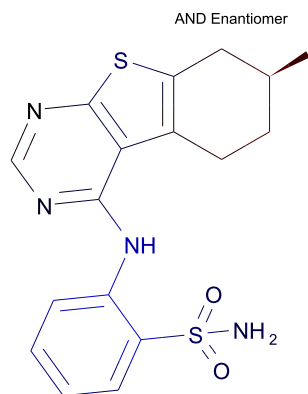C<sub>17</sub>H<sub>18</sub>N<sub>4</sub>O<sub>2</sub>S<sub>2</sub>

Molecular Weight: 374.48042

ALogP: 3.541

Rotatable Bonds: 3

Acceptors: 5

Donors: 2

**Model Prediction**

Prediction: Single-Carcinogen

Probability: 0.146

Enrichment: 0.484

Bayesian Score: -9.03

Mahalanobis Distance: 14

Mahalanobis Distance p-value: 1.58e-005

Prediction: Positive if the Bayesian score is above the estimated best cutoff value from minimizing the false positive and false negative rate.

Probability: The estimated probability that the sample is in the positive category. This assumes that the Bayesian score follows a normal distribution and is different from the prediction using a cutoff.

Enrichment: An estimate of enrichment, that is, the increased likelihood (versus random) of this sample being in the category.

Bayesian Score: The standard Laplacian-modified Bayesian score.

Mahalanobis Distance: The Mahalanobis distance (MD) is the distance to the center of the training data. The larger the MD, the less trustworthy the prediction.

Mahalanobis Distance p-value: The p-value gives the fraction of training data with an MD greater than or equal to the one for the given sample, assuming normally distributed data. The smaller the p-value, the less trustworthy the prediction. For highly non-normal X properties (e.g., fingerprints), the MD p-value is wildly inaccurate.

**Structural Similar Compounds**

| Name               | Phenolphthalein                                                     | Bicalutamide                                                        | Sulfamethazine                                                      |
|--------------------|---------------------------------------------------------------------|---------------------------------------------------------------------|---------------------------------------------------------------------|
| Structure          |                                                                     |                                                                     |                                                                     |
| Actual Endpoint    | Multiple-Carcinogen                                                 | Single-Carcinogen                                                   | Single-Carcinogen                                                   |
| Predicted Endpoint | Multiple-Carcinogen                                                 | Single-Carcinogen                                                   | Single-Carcinogen                                                   |
| Distance           | 0.712                                                               | 0.715                                                               | 0.719                                                               |
| Reference          | US FDA (Centre for Drug Eval.& Res./Off. Testing & Res.) Sept. 1997 | US FDA (Centre for Drug Eval.& Res./Off. Testing & Res.) Sept. 1997 | US FDA (Centre for Drug Eval.& Res./Off. Testing & Res.) Sept. 1997 |

**Model Applicability**

Unknown features are fingerprint features in the query molecule, but not found or appearing too infrequently in the training set.

1. All properties and OPS components are within expected ranges.
2. Unknown FCFP\_2 feature: 1293778554: [\*]:[c](:[\*])N[c](:[\*]):[\*]

**Feature Contribution****Top features for positive contribution**

| Fingerprint | Bit/Smiles  | Feature Structure                                      | Score | Multiple-Carcinogen in training set |
|-------------|-------------|--------------------------------------------------------|-------|-------------------------------------|
| FCFP_12     | -1441604640 | <p>AND Enantiomer</p> <p>[*]:[c]1:[*]C[C@@H](C)CC1</p> | 0.75  | 4 out of 4                          |

|                                               |                   |                                                                                                                                                                   |              |                                            |
|-----------------------------------------------|-------------------|-------------------------------------------------------------------------------------------------------------------------------------------------------------------|--------------|--------------------------------------------|
| FCFP_12                                       | -2002183168       | <p>AND Enantiomer</p> 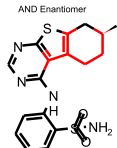 <p><chem>*[C@@H]1*[c]2[*]:*[c]([*]):[c]:2CC1</chem></p> | 0.616        | 4 out of 5                                 |
| FCFP_12                                       | -124685461        | <p>AND Enantiomer</p>  <p><chem>*]:n:[cH]:n:[*]</chem></p>                     | 0.4          | 1 out of 1                                 |
| <b>Top Features for negative contribution</b> |                   |                                                                                                                                                                   |              |                                            |
| <b>Fingerprint</b>                            | <b>Bit/Smiles</b> | <b>Feature Structure</b>                                                                                                                                          | <b>Score</b> | <b>Multiple-Carcinogen in training set</b> |
| FCFP_12                                       | -1151884458       | <p>AND Enantiomer</p>  <p><chem>*]N[c](:n:[*]):[c](:[*]):[*]</chem></p>        | -1.11        | 0 out of 6                                 |
| FCFP_12                                       | 590925877         | <p>AND Enantiomer</p>  <p><chem>*]N[c](:[cH]:[*]):[cH]:[*]</chem></p>        | -0.998       | 1 out of 13                                |
| FCFP_12                                       | -1096219292       | <p>AND Enantiomer</p>  <p><chem>*]:c]([*])S(=O)(=O)N</chem></p>              | -0.859       | 0 out of 4                                 |



9b

TOPKAT\_Mouse\_Male\_FDA\_Single\_vs\_Multiple

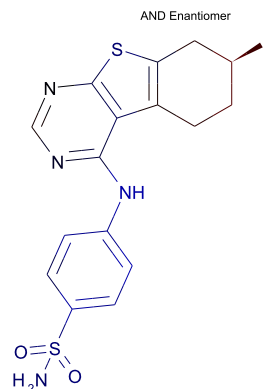C<sub>17</sub>H<sub>18</sub>N<sub>4</sub>O<sub>2</sub>S<sub>2</sub>

Molecular Weight: 374.48042

ALogP: 3.541

Rotatable Bonds: 3

Acceptors: 5

Donors: 2

**Model Prediction**

Prediction: Single-Carcinogen

Probability: 0.146

Enrichment: 0.485

Bayesian Score: -8.75

Mahalanobis Distance: 11.9

Mahalanobis Distance p-value: 0.00077

Prediction: Positive if the Bayesian score is above the estimated best cutoff value from minimizing the false positive and false negative rate.

Probability: The estimated probability that the sample is in the positive category. This assumes that the Bayesian score follows a normal distribution and is different from the prediction using a cutoff.

Enrichment: An estimate of enrichment, that is, the increased likelihood (versus random) of this sample being in the category.

Bayesian Score: The standard Laplacian-modified Bayesian score.

Mahalanobis Distance: The Mahalanobis distance (MD) is the distance to the center of the training data. The larger the MD, the less trustworthy the prediction.

Mahalanobis Distance p-value: The p-value gives the fraction of training data with an MD greater than or equal to the one for the given sample, assuming normally distributed data. The smaller the p-value, the less trustworthy the prediction. For highly non-normal X properties (e.g., fingerprints), the MD p-value is wildly inaccurate.

**Structural Similar Compounds**

| Name               | Sulfamethazine                                                      | Bicalutamide                                                        | Phenolphthalein                                                     |
|--------------------|---------------------------------------------------------------------|---------------------------------------------------------------------|---------------------------------------------------------------------|
| Structure          |                                                                     |                                                                     |                                                                     |
| Actual Endpoint    | Single-Carcinogen                                                   | Single-Carcinogen                                                   | Multiple-Carcinogen                                                 |
| Predicted Endpoint | Single-Carcinogen                                                   | Single-Carcinogen                                                   | Multiple-Carcinogen                                                 |
| Distance           | 0.711                                                               | 0.716                                                               | 0.723                                                               |
| Reference          | US FDA (Centre for Drug Eval.& Res./Off. Testing & Res.) Sept. 1997 | US FDA (Centre for Drug Eval.& Res./Off. Testing & Res.) Sept. 1997 | US FDA (Centre for Drug Eval.& Res./Off. Testing & Res.) Sept. 1997 |

**Model Applicability**

Unknown features are fingerprint features in the query molecule, but not found or appearing too infrequently in the training set.

1. All properties and OPS components are within expected ranges.
2. Unknown FCFP\_2 feature: 1293778554: [\*]:[c](:[\*])N[c](:[\*]):[\*]

**Feature Contribution****Top features for positive contribution**

| Fingerprint | Bit/Smiles  | Feature Structure             | Score | Multiple-Carcinogen in training set |
|-------------|-------------|-------------------------------|-------|-------------------------------------|
| FCFP_12     | -1441604640 | <br>[*]:[c]1:[*]C[C@@H](C)CC1 | 0.75  | 4 out of 4                          |

|                                               |                   |                                                                                                                                                                  |              |                                            |
|-----------------------------------------------|-------------------|------------------------------------------------------------------------------------------------------------------------------------------------------------------|--------------|--------------------------------------------|
| FCFP_12                                       | -2002183168       | <p>AND Enantiomer</p> 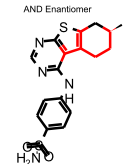 <p><chem>[*]C@@H1[*](c2[*]:[*]c(c[*])c2)CC1</chem></p> | 0.616        | 4 out of 5                                 |
| FCFP_12                                       | -124685461        | <p>AND Enantiomer</p>  <p><chem>[*]:n:[cH]:n:[*]</chem></p>                   | 0.4          | 1 out of 1                                 |
| <b>Top Features for negative contribution</b> |                   |                                                                                                                                                                  |              |                                            |
| <b>Fingerprint</b>                            | <b>Bit/Smiles</b> | <b>Feature Structure</b>                                                                                                                                         | <b>Score</b> | <b>Multiple-Carcinogen in training set</b> |
| FCFP_12                                       | -1151884458       | <p>AND Enantiomer</p>  <p><chem>[*]N[c](:n:[*]):[c](:[*]):[*]</chem></p>      | -1.11        | 0 out of 6                                 |
| FCFP_12                                       | 590925877         | <p>AND Enantiomer</p>  <p><chem>[*]N[c](:[cH]:[*]):[cH]:[*]</chem></p>      | -0.998       | 1 out of 13                                |
| FCFP_12                                       | -1096219292       | <p>AND Enantiomer</p>  <p><chem>[*]:c(c[*])S(=O)(=O)N</chem></p>            | -0.859       | 0 out of 4                                 |



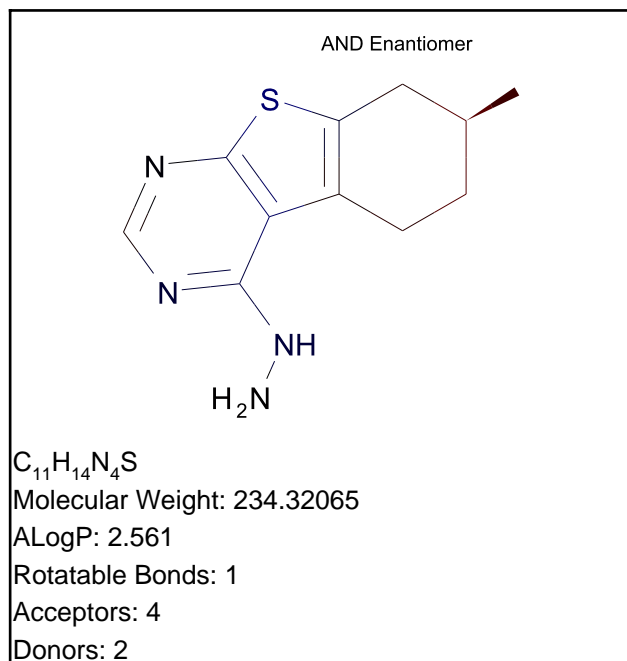

### Model Prediction

Prediction: Multiple-Carcinogen

Probability: 0.201

Enrichment: 0.666

Bayesian Score: -2.53

Mahalanobis Distance: 15.1

Mahalanobis Distance p-value: 2.29e-006

Prediction: Positive if the Bayesian score is above the estimated best cutoff value from minimizing the false positive and false negative rate.

Probability: The estimated probability that the sample is in the positive category. This assumes that the Bayesian score follows a normal distribution and is different from the prediction using a cutoff.

Enrichment: An estimate of enrichment, that is, the increased likelihood (versus random) of this sample being in the category.

Bayesian Score: The standard Laplacian-modified Bayesian score.

Mahalanobis Distance: The Mahalanobis distance (MD) is the distance to the center of the training data. The larger the MD, the less trustworthy the prediction.

Mahalanobis Distance p-value: The p-value gives the fraction of training data with an MD greater than or equal to the one for the given sample, assuming normally distributed data. The smaller the p-value, the less trustworthy the prediction. For highly non-normal X properties (e.g., fingerprints), the MD p-value is wildly inaccurate.

### Structural Similar Compounds

| Name               | Danthron                                                                            | Hydralazine                                                                         | Phenobarbital                                                                       |
|--------------------|-------------------------------------------------------------------------------------|-------------------------------------------------------------------------------------|-------------------------------------------------------------------------------------|
| Structure          | 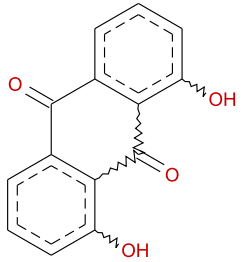 |  |  |
| Actual Endpoint    | Single-Carcinogen                                                                   | Single-Carcinogen                                                                   | Multiple-Carcinogen                                                                 |
| Predicted Endpoint | Single-Carcinogen                                                                   | Single-Carcinogen                                                                   | Multiple-Carcinogen                                                                 |
| Distance           | 0.576                                                                               | 0.636                                                                               | 0.643                                                                               |
| Reference          | US FDA (Centre for Drug Eval.& Res./Off. Testing & Res.) Sept. 1997                 | US FDA (Centre for Drug Eval.& Res./Off. Testing & Res.) Sept. 1997                 | US FDA (Centre for Drug Eval.& Res./Off. Testing & Res.) Sept. 1997                 |

### Model Applicability

Unknown features are fingerprint features in the query molecule, but not found or appearing too infrequently in the training set.

1. All properties and OPS components are within expected ranges.

### Feature Contribution

#### Top features for positive contribution

| Fingerprint | Bit/Smiles  | Feature Structure                                                                                                                                                                                   | Score | Multiple-Carcinogen in training set |
|-------------|-------------|-----------------------------------------------------------------------------------------------------------------------------------------------------------------------------------------------------|-------|-------------------------------------|
| FCFP_12     | -1441604640 | <p style="text-align: center;">AND Enantiomer</p> 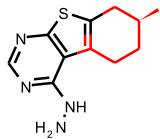 <p style="text-align: center;">[*]:[*]1[*]C[C@@H](C)CC1</p> | 0.75  | 4 out of 4                          |

|                                               |                   |                                                                                                                                                              |              |                                            |
|-----------------------------------------------|-------------------|--------------------------------------------------------------------------------------------------------------------------------------------------------------|--------------|--------------------------------------------|
| FCFP_12                                       | -2002183168       | <p>AND Enantiomer</p> 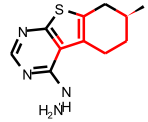 <p>[*]C@@H1[*]c2[*]<br/>:[*]c(c[*])c:2<br/>CC1</p> | 0.616        | 4 out of 5                                 |
| FCFP_12                                       | -124685461        | <p>AND Enantiomer</p>  <p>[*]:n:[cH]:n:[*]</p>                            | 0.4          | 1 out of 1                                 |
| <b>Top Features for negative contribution</b> |                   |                                                                                                                                                              |              |                                            |
| <b>Fingerprint</b>                            | <b>Bit/Smiles</b> | <b>Feature Structure</b>                                                                                                                                     | <b>Score</b> | <b>Multiple-Carcinogen in training set</b> |
| FCFP_12                                       | -1151884458       | <p>AND Enantiomer</p>  <p>[*]N[c](:n:[*]):[c](:<br/>[*]):[*]</p>          | -1.11        | 0 out of 6                                 |
| FCFP_12                                       | 17                | <p>AND Enantiomer</p>  <p>[*]:s:[*]</p>                                 | -0.53        | 5 out of 27                                |
| FCFP_12                                       | -1564473960       | <p>AND Enantiomer</p>  <p>[*]:n:[c]1:s:[*]:[*]:<br/>[c]:1:[*]</p>       | -0.519       | 0 out of 2                                 |





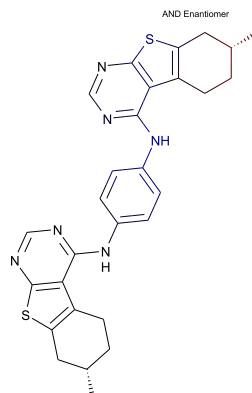
 $C_{28}H_{28}N_6S_2$ 

Molecular Weight: 512.69212

ALogP: 7.842

Rotatable Bonds: 4

Acceptors: 6

Donors: 2

## Model Prediction

Prediction: Single-Carcinogen

Probability: 0.159

Enrichment: 0.527

Bayesian Score: -5.92

Mahalanobis Distance: 14.5

Mahalanobis Distance p-value: 5.83e-006

Prediction: Positive if the Bayesian score is above the estimated best cutoff value from minimizing the false positive and false negative rate.

Probability: The estimated probability that the sample is in the positive category. This assumes that the Bayesian score follows a normal distribution and is different from the prediction using a cutoff.

Enrichment: An estimate of enrichment, that is, the increased likelihood (versus random) of this sample being in the category.

Bayesian Score: The standard Laplacian-modified Bayesian score.

Mahalanobis Distance: The Mahalanobis distance (MD) is the distance to the center of the training data. The larger the MD, the less trustworthy the prediction.

Mahalanobis Distance p-value: The p-value gives the fraction of training data with an MD greater than or equal to the one for the given sample, assuming normally distributed data. The smaller the p-value, the less trustworthy the prediction. For highly non-normal X properties (e.g., fingerprints), the MD p-value is wildly inaccurate.

## Structural Similar Compounds

| Name               | Glimepiride                                                         | Simvastatin                                                         | Bicalutamide                                                        |
|--------------------|---------------------------------------------------------------------|---------------------------------------------------------------------|---------------------------------------------------------------------|
| Structure          |                                                                     |                                                                     |                                                                     |
| Actual Endpoint    | Single-Carcinogen                                                   | Multiple-Carcinogen                                                 | Single-Carcinogen                                                   |
| Predicted Endpoint | Single-Carcinogen                                                   | Multiple-Carcinogen                                                 | Single-Carcinogen                                                   |
| Distance           | 0.924                                                               | 0.936                                                               | 0.939                                                               |
| Reference          | US FDA (Centre for Drug Eval.& Res./Off. Testing & Res.) Sept. 1997 | US FDA (Centre for Drug Eval.& Res./Off. Testing & Res.) Sept. 1997 | US FDA (Centre for Drug Eval.& Res./Off. Testing & Res.) Sept. 1997 |

## Model Applicability

Unknown features are fingerprint features in the query molecule, but not found or appearing too infrequently in the training set.

- OPS PC7 out of range. Value: -4.4901. Training min, max, SD, explained variance: -3.9478, 3.0766, 1.527, 0.0435.
- Unknown FCFP\_2 feature: 1293778554: [\*]:[c](:[\*])N[c](:[\*]):[\*]

## Feature Contribution

### Top features for positive contribution

| Fingerprint | Bit/Smiles  | Feature Structure                   | Score | Multiple-Carcinogen in training set |
|-------------|-------------|-------------------------------------|-------|-------------------------------------|
| FCFP_12     | -1441604640 | <br><chem>*[c]1:[c]c@H(C)CC1</chem> | 0.75  | 4 out of 4                          |

|                                               |                   |                                                                                                                                                                |              |                                            |
|-----------------------------------------------|-------------------|----------------------------------------------------------------------------------------------------------------------------------------------------------------|--------------|--------------------------------------------|
| FCFP_12                                       | -2002183168       | <p>AND Enantiomer</p>  <p>[*]C@@H1[*][c]2[*]<br/>[*]:c[*]:c]2<br/>CC1</p>   | 0.616        | 4 out of 5                                 |
| FCFP_12                                       | -124685461        | <p>AND Enantiomer</p>  <p>[*]:n:[cH]:n:[*]</p>                              | 0.4          | 1 out of 1                                 |
| <b>Top Features for negative contribution</b> |                   |                                                                                                                                                                |              |                                            |
| <b>Fingerprint</b>                            | <b>Bit/Smiles</b> | <b>Feature Structure</b>                                                                                                                                       | <b>Score</b> | <b>Multiple-Carcinogen in training set</b> |
| FCFP_12                                       | -1151884458       | <p>AND Enantiomer</p>  <p>[*]N[c](:n:[*]):[c](:<br/>[*]):[*]</p>            | -1.11        | 0 out of 6                                 |
| FCFP_12                                       | 590925877         | <p>AND Enantiomer</p>  <p>[*]N[c](:[cH]:[*]):[c<br/>H]:[*]</p>            | -0.998       | 1 out of 13                                |
| FCFP_12                                       | -773983804        | <p>AND Enantiomer</p>  <p>[*]N[c]1:[cH]:[*]:[c]<br/>([*]):[cH]:[cH]:1</p> | -0.789       | 1 out of 10                                |



5a

## TOPKAT\_Ocular\_Irritancy\_Mild\_vs\_Moderate\_Severe

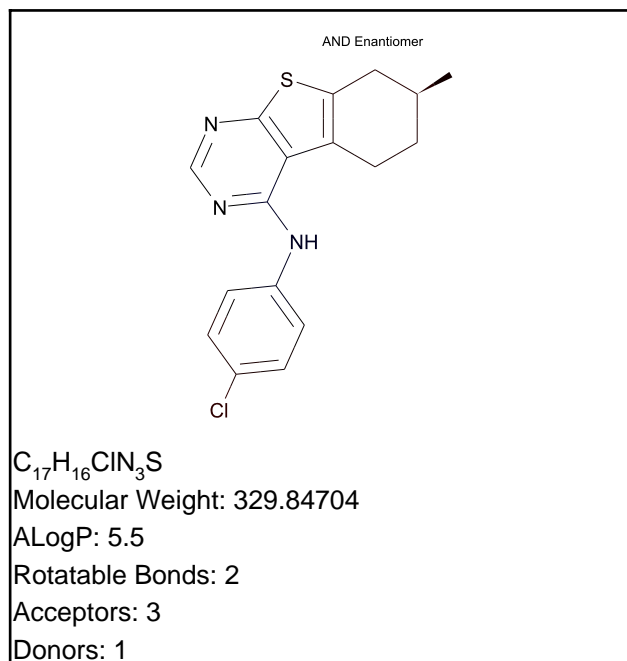**Model Prediction**Prediction: **Moderate\_Severe**

Probability: 0.833

Enrichment: 1.21

Bayesian Score: 0.771

Mahalanobis Distance: 8.73

Mahalanobis Distance p-value: 0.657

Prediction: Positive if the Bayesian score is above the estimated best cutoff value from minimizing the false positive and false negative rate.

Probability: The estimated probability that the sample is in the positive category. This assumes that the Bayesian score follows a normal distribution and is different from the prediction using a cutoff.

Enrichment: An estimate of enrichment, that is, the increased likelihood (versus random) of this sample being in the category.

Bayesian Score: The standard Laplacian-modified Bayesian score.

Mahalanobis Distance: The Mahalanobis distance (MD) is the distance to the center of the training data. The larger the MD, the less trustworthy the prediction.

Mahalanobis Distance p-value: The p-value gives the fraction of training data with an MD greater than or equal to the one for the given sample, assuming normally distributed data. The smaller the p-value, the less trustworthy the prediction. For highly non-normal X properties (e.g., fingerprints), the MD p-value is wildly inaccurate.

**Structural Similar Compounds**

| Name               | ANTHRAQUINONE;1-(2;4;6-TRIMETHYLPHENYLAMINO)-                                       | BENZILIC ACID; 4;4'-DICHLORO-; ISOPROPYL ESTER                                      | BENZAMIDE; N-(5-CHLORO-1-ANTHRAQUINONYL)-                                           |
|--------------------|-------------------------------------------------------------------------------------|-------------------------------------------------------------------------------------|-------------------------------------------------------------------------------------|
| Structure          | 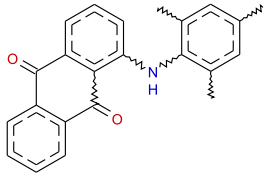 |  |  |
| Actual Endpoint    | Moderate_Severe                                                                     | Moderate_Severe                                                                     | Mild                                                                                |
| Predicted Endpoint | Mild                                                                                | Moderate_Severe                                                                     | Mild                                                                                |
| Distance           | 0.582                                                                               | 0.596                                                                               | 0.597                                                                               |
| Reference          | 28ZPAK-;242;72                                                                      | CIGET* -;77                                                                         | 28ZPAK 89;72                                                                        |

**Model Applicability**

Unknown features are fingerprint features in the query molecule, but not found or appearing too infrequently in the training set.

- All properties and OPS components are within expected ranges.
- Unknown FCFP\_2 feature: -1564473960: [\*]:n:[c]1:s:[\*]:[\*]:[c]:1:[\*]
- Unknown FCFP\_2 feature: -124685461: [\*]:n:c:n:[\*]
- Unknown FCFP\_2 feature: -1151884458: [\*]N[c](:n:[\*]):[c](:[\*]):[\*]

**Feature Contribution****Top features for positive contribution**

| Fingerprint | Bit/Smiles  | Feature Structure                                                                                                                                                                                     | Score | Moderate_Severe in training set |
|-------------|-------------|-------------------------------------------------------------------------------------------------------------------------------------------------------------------------------------------------------|-------|---------------------------------|
| FCFP_10     | -1441604640 | <p style="text-align: center;">AND Enantiomer</p> 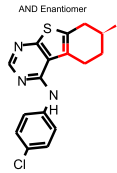 <p style="text-align: center;">[*]:[c]1:[*]:[c]C@H](C)CC1</p> | 0.344 | 6 out of 6                      |

|                                               |                   |                                                                                                                                                                           |              |                                            |
|-----------------------------------------------|-------------------|---------------------------------------------------------------------------------------------------------------------------------------------------------------------------|--------------|--------------------------------------------|
| FCFP_10                                       | -1508180856       | <p>AND Enantiomer</p> 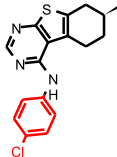 <p>[*][c]1:[cH]:[cH]:[c]<br/>(Cl):[cH]:[cH]:1</p>               | 0.329        | 16 out of 17                               |
| FCFP_10                                       | -745491832        | <p>AND Enantiomer</p>  <p>Cl[c]1:[cH]:[cH]:[*]:<br/>[cH]:[cH]:1</p>                    | 0.304        | 29 out of 32                               |
| <b>Top Features for negative contribution</b> |                   |                                                                                                                                                                           |              |                                            |
| <b>Fingerprint</b>                            | <b>Bit/Smiles</b> | <b>Feature Structure</b>                                                                                                                                                  | <b>Score</b> | <b>Moderate_Severe<br/>in training set</b> |
| FCFP_10                                       | 1293778554        | <p>AND Enantiomer</p>  <p>[*]:[c]:[*])N[c](:[*<br/>]):[*]</p>                          | -0.304       | 9 out of 19                                |
| FCFP_10                                       | -773983804        | <p>AND Enantiomer</p>  <p>[*]N[c]1:[cH]:[*]:[c]<br/>([*]):[cH]:[cH]:1</p>             | -0.294       | 50 out of 102                              |
| FCFP_10                                       | 307419094         | <p>AND Enantiomer</p>  <p>[*][c](:[*]):[c]1:[c]<br/>([*]):[*]:[*]:[c]:1:<br/>[*]</p> | -0.29        | 21 out of 43                               |

5b

## TOPKAT\_Ocular\_Irritancy\_Mild\_vs\_Moderate\_Severe

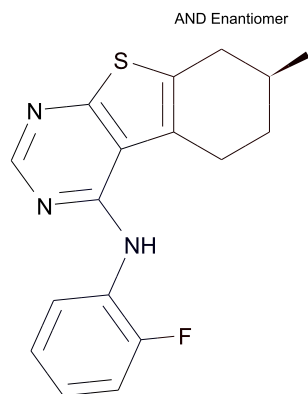C<sub>17</sub>H<sub>16</sub>FN<sub>3</sub>S

Molecular Weight: 313.39244

ALogP: 5.041

Rotatable Bonds: 2

Acceptors: 3

Donors: 1

**Model Prediction****Prediction: Moderate\_Severe**

Probability: 0.826

Enrichment: 1.2

Bayesian Score: 0.219

Mahalanobis Distance: 8.63

Mahalanobis Distance p-value: 0.708

Prediction: Positive if the Bayesian score is above the estimated best cutoff value from minimizing the false positive and false negative rate.

Probability: The estimated probability that the sample is in the positive category. This assumes that the Bayesian score follows a normal distribution and is different from the prediction using a cutoff.

Enrichment: An estimate of enrichment, that is, the increased likelihood (versus random) of this sample being in the category.

Bayesian Score: The standard Laplacian-modified Bayesian score.

Mahalanobis Distance: The Mahalanobis distance (MD) is the distance to the center of the training data. The larger the MD, the less trustworthy the prediction.

Mahalanobis Distance p-value: The p-value gives the fraction of training data with an MD greater than or equal to the one for the given sample, assuming normally distributed data. The smaller the p-value, the less trustworthy the prediction. For highly non-normal X properties (e.g., fingerprints), the MD p-value is wildly inaccurate.

**Structural Similar Compounds**

| Name               | N;S-DIBENZOYL-O-AMINOTHIOPHENOL | BENZAMIDE; N-(5-CHLORO-1-ANTHRAQUINONYL)- | BENZILIC ACID; 4;4'-DICHLORO-; ISOPROPYL ESTER |
|--------------------|---------------------------------|-------------------------------------------|------------------------------------------------|
| Structure          |                                 |                                           |                                                |
| Actual Endpoint    | Mild                            | Mild                                      | Moderate_Severe                                |
| Predicted Endpoint | Mild                            | Mild                                      | Moderate_Severe                                |
| Distance           | 0.566                           | 0.573                                     | 0.600                                          |
| Reference          | 28ZPAK-;175;72                  | 28ZPAK 89;72                              | CIGET* -;--;77                                 |

**Model Applicability**

Unknown features are fingerprint features in the query molecule, but not found or appearing too infrequently in the training set.

1. All properties and OPS components are within expected ranges.
2. Unknown FCFP\_2 feature: -1564473960: [\*]:n:[c]1:s:[\*]:[\*]:[c]:1:[\*]
3. Unknown FCFP\_2 feature: -124685461: [\*]:n:c:n:[\*]
4. Unknown FCFP\_2 feature: -1151884458: [\*]N[c](:n:[\*]):[c](:[\*]):[\*]

**Feature Contribution****Top features for positive contribution**

| Fingerprint | Bit/Smiles  | Feature Structure                                      | Score | Moderate_Severe in training set |
|-------------|-------------|--------------------------------------------------------|-------|---------------------------------|
| FCFP_10     | -1441604640 | <p>AND Enantiomer</p> <p>[*]:[c]1:[*]C[C@@H](C)CC1</p> | 0.344 | 6 out of 6                      |

|                                               |                   |                                                                                                                                                                 |              |                                        |
|-----------------------------------------------|-------------------|-----------------------------------------------------------------------------------------------------------------------------------------------------------------|--------------|----------------------------------------|
| FCFP_10                                       | -1539132615       | <p>AND Enantiomer</p> 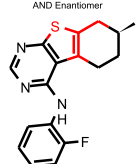 <p>[*]C[c]1:s:[*]:[*]:[c]:1[*]</p>                    | 0.224        | 11 out of 13                           |
| FCFP_10                                       | -2002183168       | <p>AND Enantiomer</p>  <p>[*]C@@H1[*]c2:[*]:[*]c([*]):c2:CC1</p>             | 0.207        | 23 out of 28                           |
| <b>Top Features for negative contribution</b> |                   |                                                                                                                                                                 |              |                                        |
| <b>Fingerprint</b>                            | <b>Bit/Smiles</b> | <b>Feature Structure</b>                                                                                                                                        | <b>Score</b> | <b>Moderate_Severe in training set</b> |
| FCFP_10                                       | 1293778554        | <p>AND Enantiomer</p>  <p>[*]:[c](:[*])N[c](:[*]):[*]</p>                    | -0.304       | 9 out of 19                            |
| FCFP_10                                       | -773983804        | <p>AND Enantiomer</p>  <p>[*]N[c]1:[cH]:[*]:[c]([*]):[cH]:[cH]:1</p>        | -0.294       | 50 out of 102                          |
| FCFP_10                                       | 307419094         | <p>AND Enantiomer</p>  <p>[*][c](:[*]):[c]1:[c]([*]):[*]:[*]:[c]:1:[*]</p> | -0.29        | 21 out of 43                           |



5c

## TOPKAT\_Ocular\_Irritancy\_Mild\_vs\_Moderate\_Severe

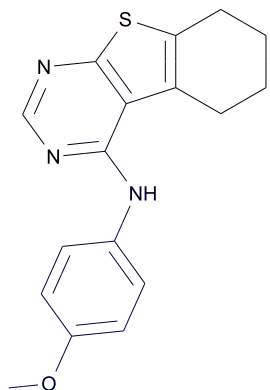C<sub>17</sub>H<sub>17</sub>N<sub>3</sub>OS

Molecular Weight: 311.40138

ALogP: 4.568

Rotatable Bonds: 3

Acceptors: 4

Donors: 1

**Model Prediction**

Prediction: Mild

Probability: 0.756

Enrichment: 1.1

Bayesian Score: -2.35

Mahalanobis Distance: 7.33

Mahalanobis Distance p-value: 0.992

Prediction: Positive if the Bayesian score is above the estimated best cutoff value from minimizing the false positive and false negative rate.

Probability: The estimated probability that the sample is in the positive category. This assumes that the Bayesian score follows a normal distribution and is different from the prediction using a cutoff.

Enrichment: An estimate of enrichment, that is, the increased likelihood (versus random) of this sample being in the category.

Bayesian Score: The standard Laplacian-modified Bayesian score.

Mahalanobis Distance: The Mahalanobis distance (MD) is the distance to the center of the training data. The larger the MD, the less trustworthy the prediction.

Mahalanobis Distance p-value: The p-value gives the fraction of training data with an MD greater than or equal to the one for the given sample, assuming normally distributed data. The smaller the p-value, the less trustworthy the prediction. For highly non-normal X properties (e.g., fingerprints), the MD p-value is wildly inaccurate.

**Structural Similar Compounds**

| Name               | N;S-DIBENZOYL-O-AMINOTHIOPHENOL | 1-BENZOYLAMINO-4-METHOXY-5-CHLORANTHRAQUINONE | BENZAMIDE; N-(5-CHLORO-1-ANTHRAQUINONYL)- |
|--------------------|---------------------------------|-----------------------------------------------|-------------------------------------------|
| Structure          |                                 |                                               |                                           |
| Actual Endpoint    | Mild                            | Mild                                          | Mild                                      |
| Predicted Endpoint | Mild                            | Mild                                          | Mild                                      |
| Distance           | 0.574                           | 0.609                                         | 0.622                                     |
| Reference          | 28ZPAK-;175;72                  | 28ZPAK-;90;72                                 | 28ZPAK 89;72                              |

**Model Applicability**

Unknown features are fingerprint features in the query molecule, but not found or appearing too infrequently in the training set.

1. All properties and OPS components are within expected ranges.
2. Unknown FCFP\_2 feature: -1564473960: [\*]:n:[c]1:s:[\*]:[\*]:[c]:1:[\*]
3. Unknown FCFP\_2 feature: -124685461: [\*]:n:c:n:[\*]
4. Unknown FCFP\_2 feature: -1151884458: [\*]N[c](:n:[\*]):[c](:[\*]):[\*]

**Feature Contribution****Top features for positive contribution**

| Fingerprint | Bit/Smiles  | Feature Structure                | Score | Moderate_Severe in training set |
|-------------|-------------|----------------------------------|-------|---------------------------------|
| FCFP_10     | -1539132615 | <br>[*]C[c]1:s:[*]:[*]:[c]:1:[*] | 0.224 | 11 out of 13                    |

|                                               |                   |                                                                                                                                                 |              |                                            |
|-----------------------------------------------|-------------------|-------------------------------------------------------------------------------------------------------------------------------------------------|--------------|--------------------------------------------|
| FCFP_10                                       | -2002183168       | 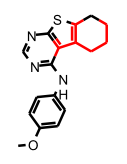<br><chem>*[C@@H]1*[c]2:[*]<br/>:[*]c([*])c:2<br/>CC1</chem> | 0.207        | 23 out of 28                               |
| FCFP_10                                       | -1438301350       | <br><chem>*:[c]1:[*]CCCC1</chem>                             | 0.204        | 14 out of 17                               |
| <b>Top Features for negative contribution</b> |                   |                                                                                                                                                 |              |                                            |
| <b>Fingerprint</b>                            | <b>Bit/Smiles</b> | <b>Feature Structure</b>                                                                                                                        | <b>Score</b> | <b>Moderate_Severe<br/>in training set</b> |
| FCFP_10                                       | -1977641857       | <br><chem>*:[cH]:[c](OC):[cH]<br/>:[*]</chem>                | -0.78        | 4 out of 15                                |
| FCFP_10                                       | -1909820884       | <br><chem>*:[c]1:[*]:[*]:[c]2<br/>CCCC[c]:1:2</chem>        | -0.507       | 0 out of 1                                 |
| FCFP_10                                       | -9847677          | <br><chem>*[c]1:[cH]:[cH]:[c]<br/>(OC):[cH]:[cH]:1</chem>  | -0.4         | 1 out of 3                                 |

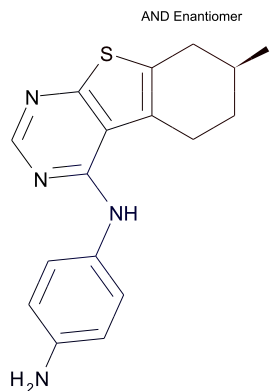

$C_{17}H_{18}N_4S$

Molecular Weight: 310.41662

ALogP: 4.089

Rotatable Bonds: 2

Acceptors: 4

Donors: 2

## Model Prediction

Prediction: Mild

Probability: 0.805

Enrichment: 1.17

Bayesian Score: -0.828

Mahalanobis Distance: 7.81

Mahalanobis Distance p-value: 0.956

Prediction: Positive if the Bayesian score is above the estimated best cutoff value from minimizing the false positive and false negative rate.

Probability: The estimated probability that the sample is in the positive category. This assumes that the Bayesian score follows a normal distribution and is different from the prediction using a cutoff.

Enrichment: An estimate of enrichment, that is, the increased likelihood (versus random) of this sample being in the category.

Bayesian Score: The standard Laplacian-modified Bayesian score.

Mahalanobis Distance: The Mahalanobis distance (MD) is the distance to the center of the training data. The larger the MD, the less trustworthy the prediction.

Mahalanobis Distance p-value: The p-value gives the fraction of training data with an MD greater than or equal to the one for the given sample, assuming normally distributed data. The smaller the p-value, the less trustworthy the prediction. For highly non-normal X properties (e.g., fingerprints), the MD p-value is wildly inaccurate.

## Structural Similar Compounds

| Name               | ANTHRAQUINONE; 1-AMINO-4-HYDROXY-2-PHENOXY- | 1-AMINO-4-BENZOYLAMINO-ANTHRAQUINONE | 1-AMINO-4-HYDROXY-5-CHLORANTHRAQUINONE |
|--------------------|---------------------------------------------|--------------------------------------|----------------------------------------|
| Structure          |                                             |                                      |                                        |
| Actual Endpoint    | Mild                                        | Mild                                 | Mild                                   |
| Predicted Endpoint | Mild                                        | Mild                                 | Mild                                   |
| Distance           | 0.596                                       | 0.609                                | 0.654                                  |
| Reference          | 28ZPAK 239;72                               | 28ZPAK-;124;72                       | 28ZPAK-;83;72                          |

## Model Applicability

Unknown features are fingerprint features in the query molecule, but not found or appearing too infrequently in the training set.

1. All properties and OPS components are within expected ranges.
2. Unknown FCFP\_2 feature: -1564473960: [\*]:n:[c]1:s:[\*]:[\*]:[c]:1:[\*]
3. Unknown FCFP\_2 feature: -124685461: [\*]:n:c:n:[\*]
4. Unknown FCFP\_2 feature: -1151884458: [\*]N[c](:n:[\*]):[c](:[\*]):[\*]

## Feature Contribution

### Top features for positive contribution

| Fingerprint | Bit/Smiles  | Feature Structure                                      | Score | Moderate_Severe in training set |
|-------------|-------------|--------------------------------------------------------|-------|---------------------------------|
| FCFP_10     | -1441604640 | <p>AND Enantiomer</p> <p>[*]:[c]1:[*]C[C@@H](C)CC1</p> | 0.344 | 6 out of 6                      |

|                                               |                   |                                                                                                                                                                  |              |                                        |
|-----------------------------------------------|-------------------|------------------------------------------------------------------------------------------------------------------------------------------------------------------|--------------|----------------------------------------|
| FCFP_10                                       | -1539132615       | <p>AND Enantiomer</p> 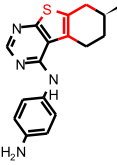 <p>[*]C[c]1:s:[*]:[*]:[c]:1[*]</p>                     | 0.224        | 11 out of 13                           |
| FCFP_10                                       | -2002183168       | <p>AND Enantiomer</p>  <p>[*]C@@H1[*]c2:[*]:[*]e(c[*]):c:2CC1</p>             | 0.207        | 23 out of 28                           |
| <b>Top Features for negative contribution</b> |                   |                                                                                                                                                                  |              |                                        |
| <b>Fingerprint</b>                            | <b>Bit/Smiles</b> | <b>Feature Structure</b>                                                                                                                                         | <b>Score</b> | <b>Moderate_Severe in training set</b> |
| FCFP_10                                       | -200702388        | <p>AND Enantiomer</p>  <p>[*]:[c]:([*])N[c]1:[c]H:[cH]:[c](N):[cH]:[cH]:1</p> | -0.361       | 2 out of 5                             |
| FCFP_10                                       | 1293778554        | <p>AND Enantiomer</p>  <p>[*]:[c]:([*])N[c]:([*]):[*]</p>                    | -0.304       | 9 out of 19                            |
| FCFP_10                                       | -773983804        | <p>AND Enantiomer</p>  <p>[*]N[c]1:[cH]:[*]:[c]([*]):[cH]:[cH]:1</p>        | -0.294       | 50 out of 102                          |

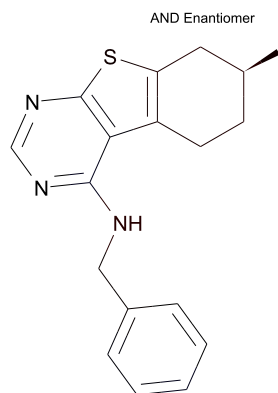

$C_{18}H_{19}N_3S$

Molecular Weight: 309.42856

ALogP: 4.678

Rotatable Bonds: 3

Acceptors: 3

Donors: 1

## Model Prediction

Prediction: **Moderate\_Severe**

Probability: 0.833

Enrichment: 1.21

Bayesian Score: 0.713

Mahalanobis Distance: 7.54

Mahalanobis Distance p-value: 0.982

Prediction: Positive if the Bayesian score is above the estimated best cutoff value from minimizing the false positive and false negative rate.

Probability: The estimated probability that the sample is in the positive category. This assumes that the Bayesian score follows a normal distribution and is different from the prediction using a cutoff.

Enrichment: An estimate of enrichment, that is, the increased likelihood (versus random) of this sample being in the category.

Bayesian Score: The standard Laplacian-modified Bayesian score.

Mahalanobis Distance: The Mahalanobis distance (MD) is the distance to the center of the training data. The larger the MD, the less trustworthy the prediction.

Mahalanobis Distance p-value: The p-value gives the fraction of training data with an MD greater than or equal to the one for the given sample, assuming normally distributed data. The smaller the p-value, the less trustworthy the prediction. For highly non-normal X properties (e.g., fingerprints), the MD p-value is wildly inaccurate.

## Structural Similar Compounds

| Name               | N;S-DIBENZOYL-O-AMINOTHIOPHENOL | BENZAMIDE; N-(5-CHLORO-1-ANTHRAQUINONYL)- | BENZILIC ACID; 4;4'-DICHLORO-; ISOPROPYL ESTER |
|--------------------|---------------------------------|-------------------------------------------|------------------------------------------------|
| Structure          |                                 |                                           |                                                |
| Actual Endpoint    | Mild                            | Mild                                      | Moderate_Severe                                |
| Predicted Endpoint | Mild                            | Mild                                      | Moderate_Severe                                |
| Distance           | 0.529                           | 0.568                                     | 0.591                                          |
| Reference          | 28ZPAK-;175;72                  | 28ZPAK 89;72                              | CIGET* -;--;77                                 |

## Model Applicability

Unknown features are fingerprint features in the query molecule, but not found or appearing too infrequently in the training set.

1. All properties and OPS components are within expected ranges.
2. Unknown FCFP\_2 feature: -1564473960: [\*]:n:[c]1:s:[\*]:[\*]:[c]:1:[\*]
3. Unknown FCFP\_2 feature: -124685461: [\*]:n:c:n:[\*]
4. Unknown FCFP\_2 feature: -1151884458: [\*]N[c](:n:[\*]):[c](:[\*]):[\*]

## Feature Contribution

### Top features for positive contribution

| Fingerprint | Bit/Smiles  | Feature Structure                          | Score | Moderate_Severe in training set |
|-------------|-------------|--------------------------------------------|-------|---------------------------------|
| FCFP_10     | -1441604640 | <br><chem>[*]:[c]1:[*]C[C@@H](C)CC1</chem> | 0.344 | 6 out of 6                      |

|                                               |                   |                                                                                                                                                               |              |                                        |
|-----------------------------------------------|-------------------|---------------------------------------------------------------------------------------------------------------------------------------------------------------|--------------|----------------------------------------|
| FCFP_10                                       | 907096426         | <p>AND Enantiomer</p> 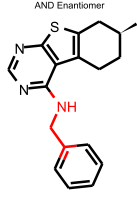 <p>[*]NC[c](:[*]):[*]</p>                           | 0.332        | 5 out of 5                             |
| FCFP_10                                       | 427906732         | <p>AND Enantiomer</p>  <p>[*]NC[c]1:[cH]:[cH]:[*]:[cH]:[cH]:1</p>          | 0.294        | 3 out of 3                             |
| <b>Top Features for negative contribution</b> |                   |                                                                                                                                                               |              |                                        |
| <b>Fingerprint</b>                            | <b>Bit/Smiles</b> | <b>Feature Structure</b>                                                                                                                                      | <b>Score</b> | <b>Moderate_Severe in training set</b> |
| FCFP_10                                       | 307419094         | <p>AND Enantiomer</p>  <p>[*][c](:[*]):[c]1:[c]([*]):[*]:[*]:[c]:1:[*]</p> | -0.29        | 21 out of 43                           |
| FCFP_10                                       | -1698724694       | <p>AND Enantiomer</p>  <p>[*]C[c]1:[cH]:[cH]:[cH]:[cH]:[cH]:1</p>         | -0.284       | 53 out of 107                          |
| FCFP_10                                       | 1294255210        | <p>AND Enantiomer</p>  <p>[*]CN[c](:[*]):[*]</p>                         | -0.218       | 20 out of 38                           |

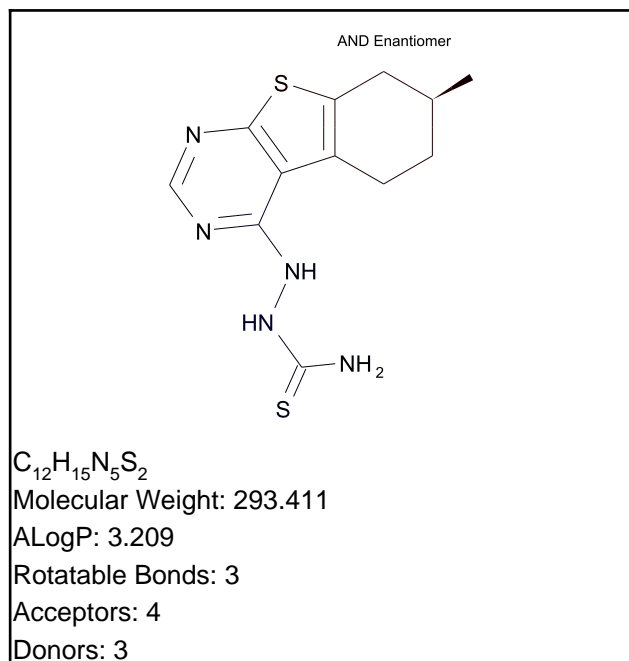

### Model Prediction

Prediction: Mild

Probability: 0.813

Enrichment: 1.18

Bayesian Score: -0.44

Mahalanobis Distance: 7.72

Mahalanobis Distance p-value: 0.967

Prediction: Positive if the Bayesian score is above the estimated best cutoff value from minimizing the false positive and false negative rate.

Probability: The estimated probability that the sample is in the positive category. This assumes that the Bayesian score follows a normal distribution and is different from the prediction using a cutoff.

Enrichment: An estimate of enrichment, that is, the increased likelihood (versus random) of this sample being in the category.

Bayesian Score: The standard Laplacian-modified Bayesian score.

Mahalanobis Distance: The Mahalanobis distance (MD) is the distance to the center of the training data. The larger the MD, the less trustworthy the prediction.

Mahalanobis Distance p-value: The p-value gives the fraction of training data with an MD greater than or equal to the one for the given sample, assuming normally distributed data. The smaller the p-value, the less trustworthy the prediction. For highly non-normal X properties (e.g., fingerprints), the MD p-value is wildly inaccurate.

### Structural Similar Compounds

| Name               | 1;2;4-TRIHIDROXY ANTHRAQUINONE                                                      | 2-NAPHTHALENESULFONIC ACID; 4-HYDROXY-7-(METHYLAMINO)-                              | ANILINE;2;2'DITHIOBIS-                                                              |
|--------------------|-------------------------------------------------------------------------------------|-------------------------------------------------------------------------------------|-------------------------------------------------------------------------------------|
| Structure          | 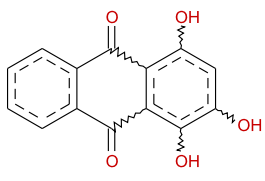 |  |  |
| Actual Endpoint    | Mild                                                                                | Mild                                                                                | Moderate_Severe                                                                     |
| Predicted Endpoint | Mild                                                                                | Mild                                                                                | Moderate_Severe                                                                     |
| Distance           | 0.678                                                                               | 0.685                                                                               | 0.740                                                                               |
| Reference          | 28ZPAK-;103;7                                                                       | 28ZPAK 190;72                                                                       | 28ZPAK-;172;72                                                                      |

### Model Applicability

Unknown features are fingerprint features in the query molecule, but not found or appearing too infrequently in the training set.

- All properties and OPS components are within expected ranges.
- Unknown FCFP\_2 feature: -1564473960: [\*]:n:[c]1:s:[\*]:[\*]:[c]:1:[\*]
- Unknown FCFP\_2 feature: -124685461: [\*]:n:c:n:[\*]
- Unknown FCFP\_2 feature: -1151884458: [\*]N[c](:n:[\*]):[c](:[\*]):[\*]
- Unknown FCFP\_2 feature: -885461129: [\*]NNC(=[\*])[\*]

### Feature Contribution

| Top features for positive contribution |             |                                                                                                                                              |       |                                 |
|----------------------------------------|-------------|----------------------------------------------------------------------------------------------------------------------------------------------|-------|---------------------------------|
| Fingerprint                            | Bit/Smiles  | Feature Structure                                                                                                                            | Score | Moderate_Severe in training set |
| FCFP_10                                | -1441604640 | <p>AND Enantiomer</p> 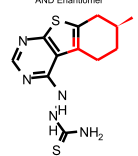 <p>[*]:[c]1:[*]C[C@@H](C)CC1</p> | 0.344 | 6 out of 6                      |

|                                               |                   |                                                                                                                                                                              |              |                                        |
|-----------------------------------------------|-------------------|------------------------------------------------------------------------------------------------------------------------------------------------------------------------------|--------------|----------------------------------------|
| FCFP_10                                       | 1070061035        | <p>AND Enantiomer</p> 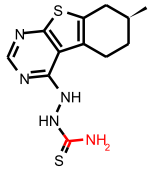 <p><chem>[*]C(=[*])N</chem></p>                                    | 0.239        | 284 out of 338                         |
| FCFP_10                                       | -1539132615       | <p>AND Enantiomer</p>  <p><chem>[*]C[c]1:s:[*]:[*]:[c]:1[*]</chem></p>                    | 0.224        | 11 out of 13                           |
| <b>Top Features for negative contribution</b> |                   |                                                                                                                                                                              |              |                                        |
| <b>Fingerprint</b>                            | <b>Bit/Smiles</b> | <b>Feature Structure</b>                                                                                                                                                     | <b>Score</b> | <b>Moderate_Severe in training set</b> |
| FCFP_10                                       | 1294344583        | <p>AND Enantiomer</p>  <p><chem>[*]NN[c](:[*]):[*]</chem></p>                             | -0.507       | 0 out of 1                             |
| FCFP_10                                       | 1499521844        | <p>AND Enantiomer</p>  <p><chem>[*]NC(=S)N</chem></p>                                   | -0.4         | 1 out of 3                             |
| FCFP_10                                       | 307419094         | <p>AND Enantiomer</p>  <p><chem>[*][c](:[*]):[c]1:[c]([*]):[*]:[*]:[c]:1:[*]</chem></p> | -0.29        | 21 out of 43                           |



9a

## TOPKAT\_Ocular\_Irritancy\_Mild\_vs\_Moderate\_Severe

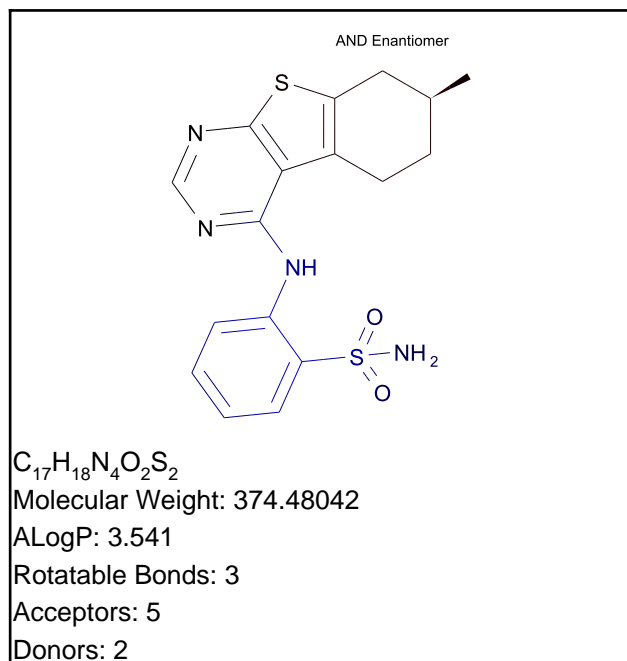**Model Prediction**

Prediction: Mild

Probability: 0.706

Enrichment: 1.02

Bayesian Score: -3.42

Mahalanobis Distance: 7.33

Mahalanobis Distance p-value: 0.992

Prediction: Positive if the Bayesian score is above the estimated best cutoff value from minimizing the false positive and false negative rate.

Probability: The estimated probability that the sample is in the positive category. This assumes that the Bayesian score follows a normal distribution and is different from the prediction using a cutoff.

Enrichment: An estimate of enrichment, that is, the increased likelihood (versus random) of this sample being in the category.

Bayesian Score: The standard Laplacian-modified Bayesian score.

Mahalanobis Distance: The Mahalanobis distance (MD) is the distance to the center of the training data. The larger the MD, the less trustworthy the prediction.

Mahalanobis Distance p-value: The p-value gives the fraction of training data with an MD greater than or equal to the one for the given sample, assuming normally distributed data. The smaller the p-value, the less trustworthy the prediction. For highly non-normal X properties (e.g., fingerprints), the MD p-value is wildly inaccurate.

**Structural Similar Compounds**

| Name               | ANTHRAQUINONE; 1-AMINO-4-HYDROXY-2-PHENOXY- | 1-AMINO-4-BENZOYLAMINO-ANTHRAQUINONE | ANILINE;2,2'DITHIOBIS- |
|--------------------|---------------------------------------------|--------------------------------------|------------------------|
| Structure          |                                             |                                      |                        |
| Actual Endpoint    | Mild                                        | Mild                                 | Moderate_Severe        |
| Predicted Endpoint | Mild                                        | Mild                                 | Moderate_Severe        |
| Distance           | 0.611                                       | 0.651                                | 0.702                  |
| Reference          | 28ZPAK 239;72                               | 28ZPAK-;124;72                       | 28ZPAK-;172;72         |

**Model Applicability**

Unknown features are fingerprint features in the query molecule, but not found or appearing too infrequently in the training set.

1. All properties and OPS components are within expected ranges.
2. Unknown FCFP\_2 feature: -1564473960: [\*]:n:[c]1:s:[\*]:[\*]:[c]:1:[\*]
3. Unknown FCFP\_2 feature: -124685461: [\*]:n:c:n:[\*]
4. Unknown FCFP\_2 feature: -1151884458: [\*]N[c](:n:[\*]):[c](:[\*]):[\*]

**Feature Contribution****Top features for positive contribution**

| Fingerprint | Bit/Smiles  | Feature Structure                                      | Score | Moderate_Severe in training set |
|-------------|-------------|--------------------------------------------------------|-------|---------------------------------|
| FCFP_10     | -1441604640 | <p>AND Enantiomer</p> <p>[*]:[c]1:[*]C[C@@H](C)CC1</p> | 0.344 | 6 out of 6                      |

|                                               |                   |                                                                                                                                                                              |              |                                        |
|-----------------------------------------------|-------------------|------------------------------------------------------------------------------------------------------------------------------------------------------------------------------|--------------|----------------------------------------|
| FCFP_10                                       | 1070061035        | <p>AND Enantiomer</p> 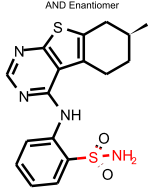 <p>[*]C(=[*])N</p>                                                 | 0.239        | 284 out of 338                         |
| FCFP_10                                       | -1539132615       | <p>AND Enantiomer</p>  <p>[*]C[c]1:s:[*]:[*]:[c]:1[*]</p>                                 | 0.224        | 11 out of 13                           |
| <b>Top Features for negative contribution</b> |                   |                                                                                                                                                                              |              |                                        |
| <b>Fingerprint</b>                            | <b>Bit/Smiles</b> | <b>Feature Structure</b>                                                                                                                                                     | <b>Score</b> | <b>Moderate_Severe in training set</b> |
| FCFP_10                                       | -377913290        | <p>AND Enantiomer</p>  <p>[*]N[c]1:[cH]:[*]:[cH]:[cH]:[c]:1S(=O)(=O)N</p>                 | -1.03        | 1 out of 7                             |
| FCFP_10                                       | -103236997        | <p>AND Enantiomer</p>  <p>[*]S(=[*])(=[*])[c]1:[cH]:[cH]:[cH]:[cH]:[c]:1N[c]:[*]:[*]</p> | -0.6         | 1 out of 4                             |
| FCFP_10                                       | -605671248        | <p>AND Enantiomer</p>  <p>[*]S(=[*])(=[*])[c]1:[cH]:[*]:[cH]:[cH]:[c]:1N[c]:[*]:[*]</p> | -0.341       | 3 out of 7                             |

9b

## TOPKAT\_Ocular\_Irritancy\_Mild\_vs\_Moderate\_Severe

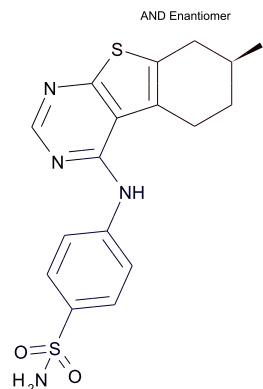C<sub>17</sub>H<sub>18</sub>N<sub>4</sub>O<sub>2</sub>S<sub>2</sub>

Molecular Weight: 374.48042

ALogP: 3.541

Rotatable Bonds: 3

Acceptors: 5

Donors: 2

**Model Prediction**

Prediction: Mild

Probability: 0.792

Enrichment: 1.15

Bayesian Score: -1.29

Mahalanobis Distance: 7.33

Mahalanobis Distance p-value: 0.992

Prediction: Positive if the Bayesian score is above the estimated best cutoff value from minimizing the false positive and false negative rate.

Probability: The estimated probability that the sample is in the positive category. This assumes that the Bayesian score follows a normal distribution and is different from the prediction using a cutoff.

Enrichment: An estimate of enrichment, that is, the increased likelihood (versus random) of this sample being in the category.

Bayesian Score: The standard Laplacian-modified Bayesian score.

Mahalanobis Distance: The Mahalanobis distance (MD) is the distance to the center of the training data. The larger the MD, the less trustworthy the prediction.

Mahalanobis Distance p-value: The p-value gives the fraction of training data with an MD greater than or equal to the one for the given sample, assuming normally distributed data. The smaller the p-value, the less trustworthy the prediction. For highly non-normal X properties (e.g., fingerprints), the MD p-value is wildly inaccurate.

**Structural Similar Compounds**

| Name               | ANTHRAQUINONE; 1-AMINO-4-HYDROXY-2-PHENOXY- | 1-AMINO-4-BENZOYLAMINO-ANTHRAQUINONE | 2-NAPHTHALENESULFONIC ACID;5-AMINO-6-ETHOXY- |
|--------------------|---------------------------------------------|--------------------------------------|----------------------------------------------|
| Structure          |                                             |                                      |                                              |
| Actual Endpoint    | Mild                                        | Mild                                 | Moderate_Severe                              |
| Predicted Endpoint | Mild                                        | Mild                                 | Mild                                         |
| Distance           | 0.620                                       | 0.660                                | 0.700                                        |
| Reference          | 28ZPAK 239;72                               | 28ZPAK-;124;72                       | 28ZPAK-;191;72                               |

**Model Applicability**

Unknown features are fingerprint features in the query molecule, but not found or appearing too infrequently in the training set.

1. All properties and OPS components are within expected ranges.
2. Unknown FCFP\_2 feature: -1564473960: [\*]:n:[c]1:s:[\*]:[\*]:[c]:1:[\*]
3. Unknown FCFP\_2 feature: -124685461: [\*]:n:c:n:[\*]
4. Unknown FCFP\_2 feature: -1151884458: [\*]N[c](:n:[\*]):[c](:[\*]):[\*]

**Feature Contribution****Top features for positive contribution**

| Fingerprint | Bit/Smiles  | Feature Structure                             | Score | Moderate_Severe in training set |
|-------------|-------------|-----------------------------------------------|-------|---------------------------------|
| FCFP_10     | -1441604640 | <br><chem>[*]:[c]1:[*]:[c]C@@[H](C)CC1</chem> | 0.344 | 6 out of 6                      |

|                                               |                   |                                                                                                                                                                                            |              |                                        |
|-----------------------------------------------|-------------------|--------------------------------------------------------------------------------------------------------------------------------------------------------------------------------------------|--------------|----------------------------------------|
| FCFP_10                                       | 1070061035        | <p>AND Enantiomer</p> 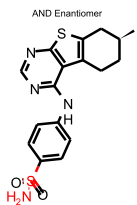 <p><chem>[*]C(=[*])N</chem></p>                                                   | 0.239        | 284 out of 338                         |
| FCFP_10                                       | -1539132615       | <p>AND Enantiomer</p>  <p><chem>[*]C[c]1:s:[*]:[*]:[c]:1[*]</chem></p>                                  | 0.224        | 11 out of 13                           |
| <b>Top Features for negative contribution</b> |                   |                                                                                                                                                                                            |              |                                        |
| <b>Fingerprint</b>                            | <b>Bit/Smiles</b> | <b>Feature Structure</b>                                                                                                                                                                   | <b>Score</b> | <b>Moderate_Severe in training set</b> |
| FCFP_10                                       | -174657146        | <p>AND Enantiomer</p>  <p><chem>[*]S(=[*])([*])[c]1:[cH]:[cH]:[c](N[c]([*]):[*]):[cH]:[cH]:1</chem></p> | -0.4         | 1 out of 3                             |
| FCFP_10                                       | 1293778554        | <p>AND Enantiomer</p>  <p><chem>[*]:[c]([*])N[c]([*]):[*]</chem></p>                                   | -0.304       | 9 out of 19                            |
| FCFP_10                                       | -773983804        | <p>AND Enantiomer</p>  <p><chem>[*]N[c]1:[cH]:[*]:[c]([*]):[cH]:[cH]:1</chem></p>                     | -0.294       | 50 out of 102                          |

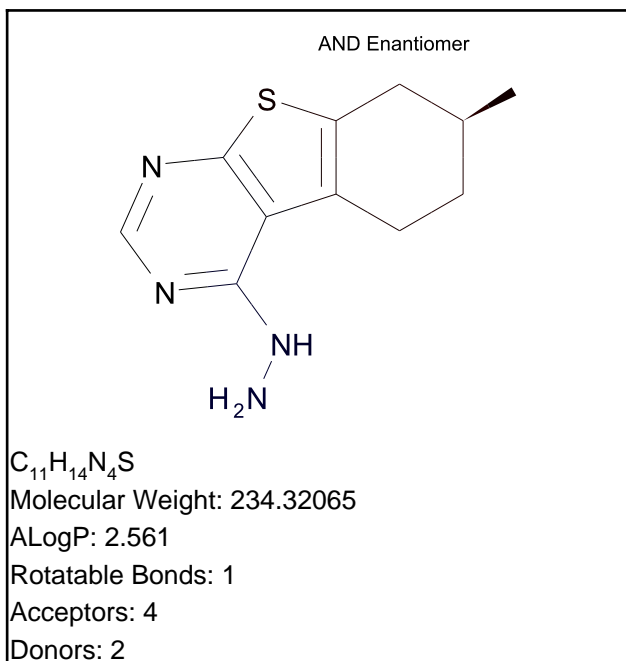

### Model Prediction

Prediction: Mild

Probability: 0.81

Enrichment: 1.18

Bayesian Score: -0.572

Mahalanobis Distance: 7.88

Mahalanobis Distance p-value: 0.946

Prediction: Positive if the Bayesian score is above the estimated best cutoff value from minimizing the false positive and false negative rate.

Probability: The estimated probability that the sample is in the positive category. This assumes that the Bayesian score follows a normal distribution and is different from the prediction using a cutoff.

Enrichment: An estimate of enrichment, that is, the increased likelihood (versus random) of this sample being in the category.

Bayesian Score: The standard Laplacian-modified Bayesian score.

Mahalanobis Distance: The Mahalanobis distance (MD) is the distance to the center of the training data. The larger the MD, the less trustworthy the prediction.

Mahalanobis Distance p-value: The p-value gives the fraction of training data with an MD greater than or equal to the one for the given sample, assuming normally distributed data. The smaller the p-value, the less trustworthy the prediction. For highly non-normal X properties (e.g., fingerprints), the MD p-value is wildly inaccurate.

### Structural Similar Compounds

| Name               | PHENOL; 4;4'-SULFONYLDI-                                                            | NAPHTHENESULFONIC ACID;2-HYDROXY-                                                   | FURIL;DIOXIME                                                                       |
|--------------------|-------------------------------------------------------------------------------------|-------------------------------------------------------------------------------------|-------------------------------------------------------------------------------------|
| Structure          | 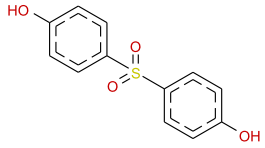 |  |  |
| Actual Endpoint    | Moderate_Severe                                                                     | Moderate_Severe                                                                     | Moderate_Severe                                                                     |
| Predicted Endpoint | Moderate_Severe                                                                     | Moderate_Severe                                                                     | Moderate_Severe                                                                     |
| Distance           | 0.542                                                                               | 0.551                                                                               | 0.554                                                                               |
| Reference          | BIOFX* 601-05501;74                                                                 | 28ZPAK-;186;72                                                                      | 28ZPAK                                                                              |

### Model Applicability

Unknown features are fingerprint features in the query molecule, but not found or appearing too infrequently in the training set.

1. All properties and OPS components are within expected ranges.
2. Unknown FCFP\_2 feature: -1564473960: [\*]:n:[c]1:s:[\*]:[\*]:[c]:1:[\*]
3. Unknown FCFP\_2 feature: -124685461: [\*]:n:c:n:[\*]
4. Unknown FCFP\_2 feature: -1151884458: [\*]N[c](:n:[\*]):[c](:[\*]):[\*]

### Feature Contribution

#### Top features for positive contribution

| Fingerprint | Bit/Smiles  | Feature Structure                                                                                                                                                                                                 | Score | Moderate_Severe in training set |
|-------------|-------------|-------------------------------------------------------------------------------------------------------------------------------------------------------------------------------------------------------------------|-------|---------------------------------|
| FCFP_10     | -1441604640 | <p style="text-align: center;">AND Enantiomer</p> 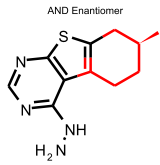 <p style="text-align: center;"><chem>[*]:[c]1:[*]C[C@@H](C)CC1</chem></p> | 0.344 | 6 out of 6                      |

|                                               |                   |                                                                                                                                                                |              |                                        |
|-----------------------------------------------|-------------------|----------------------------------------------------------------------------------------------------------------------------------------------------------------|--------------|----------------------------------------|
| FCFP_10                                       | -1539132615       | <p>AND Enantiomer</p> 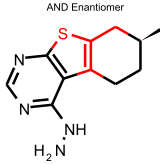 <p>[*]C[c]1:s:[*]:[*]:[c]:1[*]</p>                   | 0.224        | 11 out of 13                           |
| FCFP_10                                       | -2002183168       | <p>AND Enantiomer</p>  <p>[*]C@@H1[*]c2:[*]:[*]e([*]):c]2:CC1</p>           | 0.207        | 23 out of 28                           |
| <b>Top Features for negative contribution</b> |                   |                                                                                                                                                                |              |                                        |
| <b>Fingerprint</b>                            | <b>Bit/Smiles</b> | <b>Feature Structure</b>                                                                                                                                       | <b>Score</b> | <b>Moderate_Severe in training set</b> |
| FCFP_10                                       | 1294344583        | <p>AND Enantiomer</p>  <p>[*]NN[c](:[*]):[*]</p>                            | -0.507       | 0 out of 1                             |
| FCFP_10                                       | 1070150408        | <p>AND Enantiomer</p>  <p>[*]NN</p>                                       | -0.507       | 0 out of 1                             |
| FCFP_10                                       | 307419094         | <p>AND Enantiomer</p>  <p>[*]c](:[*]):[c]1:[c]([*]):[*]:[*]:[c]:1:[*]</p> | -0.29        | 21 out of 43                           |

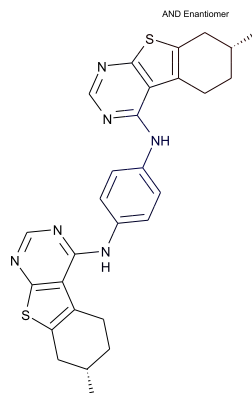
 $C_{28}H_{28}N_6S_2$ 

Molecular Weight: 512.69212

ALogP: 7.842

Rotatable Bonds: 4

Acceptors: 6

Donors: 2

## Model Prediction

Prediction: Mild

Probability: 0.808

Enrichment: 1.17

Bayesian Score: -0.679

Mahalanobis Distance: 9.84

Mahalanobis Distance p-value: 0.135

Prediction: Positive if the Bayesian score is above the estimated best cutoff value from minimizing the false positive and false negative rate.

Probability: The estimated probability that the sample is in the positive category. This assumes that the Bayesian score follows a normal distribution and is different from the prediction using a cutoff.

Enrichment: An estimate of enrichment, that is, the increased likelihood (versus random) of this sample being in the category. Bayesian Score: The standard Laplacian-modified Bayesian score.

Mahalanobis Distance: The Mahalanobis distance (MD) is the distance to the center of the training data. The larger the MD, the less trustworthy the prediction.

Mahalanobis Distance p-value: The p-value gives the fraction of training data with an MD greater than or equal to the one for the given sample, assuming normally distributed data. The smaller the p-value, the less trustworthy the prediction. For highly non-normal X properties (e.g., fingerprints), the MD p-value is wildly inaccurate.

## Structural Similar Compounds

| Name               | DINAPHTHO(1;2;3-CD:3';2';1'-IM)PERYLENE-5;10-DIONE;16;17-DIHYDROXY | Anthraquinone; 1;1'-(anthraquinon-1;5-ylenediimino)di-                 | Anthraquinone; 1;1'-(anthraquinon-1;4-ylenediimino)di-                 |
|--------------------|--------------------------------------------------------------------|------------------------------------------------------------------------|------------------------------------------------------------------------|
| Structure          |                                                                    |                                                                        |                                                                        |
| Actual Endpoint    | Mild                                                               | Mild                                                                   | Mild                                                                   |
| Predicted Endpoint | Mild                                                               | Mild                                                                   | Mild                                                                   |
| Distance           | 0.767                                                              | 0.772                                                                  | 0.774                                                                  |
| Reference          | 28ZPAK-;104;72                                                     | Prehled Prumyslove Toxikologie; Organicke Latky; Marhold; J. pp 736;86 | Prehled Prumyslove Toxikologie; Organicke Latky; Marhold; J. pp 736;86 |

## Model Applicability

Unknown features are fingerprint features in the query molecule, but not found or appearing too infrequently in the training set.

1. All properties and OPS components are within expected ranges.
2. Unknown FCFP\_2 feature: -1564473960: [\*]:n:[c]1:s:[\*]:[\*]:[c]:1:[\*]
3. Unknown FCFP\_2 feature: -124685461: [\*]:n:c:n:[\*]
4. Unknown FCFP\_2 feature: -1151884458: [\*]N[c](:n:[\*]):[c](:[\*]):[\*]

## Feature Contribution

### Top features for positive contribution

| Fingerprint | Bit/Smiles | Feature Structure | Score | Moderate_Severe in training set |
|-------------|------------|-------------------|-------|---------------------------------|
|             |            |                   |       |                                 |

|                                               |                   |                                                                                                                                                                     |              |                                        |
|-----------------------------------------------|-------------------|---------------------------------------------------------------------------------------------------------------------------------------------------------------------|--------------|----------------------------------------|
| FCFP_10                                       | -1441604640       | <p>AND Enantiomer</p> 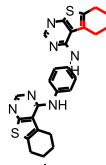 <p>[*]:[c]1:[*]C[C@@H](C)CC1</p>                          | 0.344        | 6 out of 6                             |
| FCFP_10                                       | -1539132615       | <p>AND Enantiomer</p>  <p>[*]C[c]1:s:[*]:[*]:[c]:1[*]</p>                        | 0.224        | 11 out of 13                           |
| FCFP_10                                       | -2002183168       | <p>AND Enantiomer</p>  <p>[*]C@@H1[*]c2:[*]:[*]e:[*]c2CC1</p>                    | 0.207        | 23 out of 28                           |
| <b>Top Features for negative contribution</b> |                   |                                                                                                                                                                     |              |                                        |
| <b>Fingerprint</b>                            | <b>Bit/Smiles</b> | <b>Feature Structure</b>                                                                                                                                            | <b>Score</b> | <b>Moderate_Severe in training set</b> |
| FCFP_10                                       | -200702388        | <p>AND Enantiomer</p>  <p>[*]:[c]:([*])N[c]1:[c]H:[c]H:[c](N):[c]H]:[c]H]:1</p> | -0.361       | 2 out of 5                             |
| FCFP_10                                       | 1293778554        | <p>AND Enantiomer</p>  <p>[*]:[c]:([*])N[c]:([*]):[*]</p>                      | -0.304       | 9 out of 19                            |



|         |            |                                                                                                                                                              |        |               |
|---------|------------|--------------------------------------------------------------------------------------------------------------------------------------------------------------|--------|---------------|
| FCFP_10 | -773983804 | <p>AND Enantiomer</p> 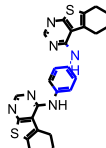 <p>[*]N[c]1:[cH]:[*]:[c]<br/>([*]):[cH]:[cH]:1</p> | -0.294 | 50 out of 102 |
|---------|------------|--------------------------------------------------------------------------------------------------------------------------------------------------------------|--------|---------------|

# Erlotinib

# TOPKAT\_Ocular\_Irritancy\_Mild\_vs\_Moderate\_Severe

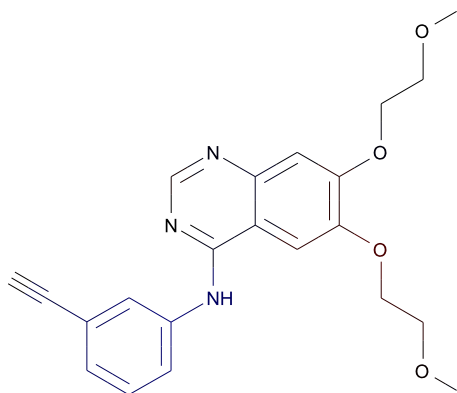

$C_{22}H_{23}N_3O_4$   
 Molecular Weight: 393.43572  
 ALogP: 4.309  
 Rotatable Bonds: 10  
 Acceptors: 7  
 Donors: 1

## Model Prediction

Prediction: Mild

Probability: 0.766

Enrichment: 1.11

Bayesian Score: -2.1

Mahalanobis Distance: 10.4

Mahalanobis Distance p-value: 0.0368

Prediction: Positive if the Bayesian score is above the estimated best cutoff value from minimizing the false positive and false negative rate.

Probability: The estimated probability that the sample is in the positive category. This assumes that the Bayesian score follows a normal distribution and is different from the prediction using a cutoff.

Enrichment: An estimate of enrichment, that is, the increased likelihood (versus random) of this sample being in the category. Bayesian Score: The standard Laplacian-modified Bayesian score.

Mahalanobis Distance: The Mahalanobis distance (MD) is the distance to the center of the training data. The larger the MD, the less trustworthy the prediction.

Mahalanobis Distance p-value: The p-value gives the fraction of training data with an MD greater than or equal to the one for the given sample, assuming normally distributed data. The smaller the p-value, the less trustworthy the prediction. For highly non-normal X properties (e.g., fingerprints), the MD p-value is wildly inaccurate.

## Structural Similar Compounds

| Name               | Benzoic acid; p-(N-butyl-2-(butylamino)acetamido)-; butyl ester; | COLCHICINE       | Benzoic acid; p-(N-butyl-2-(piperidino)acetamido)-; butyl ester; |
|--------------------|------------------------------------------------------------------|------------------|------------------------------------------------------------------|
| Structure          |                                                                  |                  |                                                                  |
| Actual Endpoint    | Moderate_Severe                                                  | Moderate_Severe  | Moderate_Severe                                                  |
| Predicted Endpoint | Moderate_Severe                                                  | Moderate_Severe  | Moderate_Severe                                                  |
| Distance           | 0.648                                                            | 0.707            | 0.750                                                            |
| Reference          | Arzneimittel-Forschung 8;609;58                                  | AJOPAA 31;837;48 | Arzneimittel-Forschung 8;609;58                                  |

## Model Applicability

Unknown features are fingerprint features in the query molecule, but not found or appearing too infrequently in the training set.

- All properties and OPS components are within expected ranges.
- Unknown FCFP\_2 feature: -124685461: [\*]:n:c:n:[\*]
- Unknown FCFP\_2 feature: -1151884458: [\*]N[c](:n:[\*]):[c](:[\*]):[\*]
- Unknown FCFP\_2 feature: 902193919: [\*]:[c](:[\*])C#C

## Feature Contribution

### Top features for positive contribution

| Fingerprint | Bit/Smiles  | Feature Structure                            | Score | Moderate_Severe in training set |
|-------------|-------------|----------------------------------------------|-------|---------------------------------|
| FCFP_10     | -1059904848 | <br><chem>*[c](*):[e](OCCO C)[eH]:[*]</chem> | 0.386 | 17 out of 17                    |

|                                               |                   |                                                                                                                                                                      |              |                                            |
|-----------------------------------------------|-------------------|----------------------------------------------------------------------------------------------------------------------------------------------------------------------|--------------|--------------------------------------------|
| FCFP_10                                       | 365650923         | 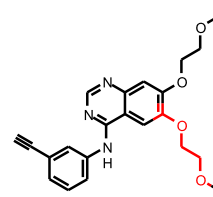<br><chem>[*]OCCO[c](:[*]):[*]</chem>                                              | 0.386        | 17 out of 17                               |
| FCFP_10                                       | -1716224640       | <br><chem>[*][c]1:[*]:[cH]:[c]2<br/>:[c]([*]):[*]:[cH]:n<br/>:[c]:2:[cH]:1</chem> | 0.294        | 3 out of 3                                 |
| <b>Top Features for negative contribution</b> |                   |                                                                                                                                                                      |              |                                            |
| <b>Fingerprint</b>                            | <b>Bit/Smiles</b> | <b>Feature Structure</b>                                                                                                                                             | <b>Score</b> | <b>Moderate_Severe<br/>in training set</b> |
| FCFP_10                                       | -1699003333       | <br><chem>[*]N[c]1:[cH]:[cH]:[c<br/>H]:[c](:[cH]:1)C#[*]</chem>                   | -1.09        | 2 out of 12                                |
| FCFP_10                                       | 1679603620        | <br><chem>[*]O[c]1:[cH]:[c](:n:<br/>[*]):[c](:[*]):[*]:[<br/>c]:1[*]</chem>      | -0.507       | 0 out of 1                                 |
| FCFP_10                                       | 341504799         | <br><chem>[*]CCOC</chem>                                                        | -0.425       | 7 out of 17                                |

5a

## TOPKAT\_Ocular\_Irritancy\_Moderate\_vs\_Severe

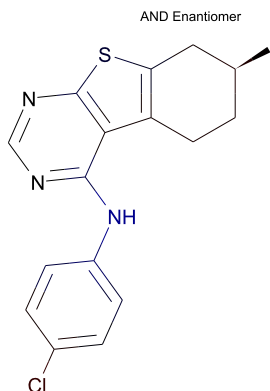C<sub>17</sub>H<sub>16</sub>ClN<sub>3</sub>S

Molecular Weight: 329.84704

ALogP: 5.5

Rotatable Bonds: 2

Acceptors: 3

Donors: 1

**Model Prediction**

Prediction: Moderate

Probability: 0.602

Enrichment: 0.971

Bayesian Score: -2.21

Mahalanobis Distance: 9.8

Mahalanobis Distance p-value: 0.0717

Prediction: Positive if the Bayesian score is above the estimated best cutoff value from minimizing the false positive and false negative rate.

Probability: The estimated probability that the sample is in the positive category. This assumes that the Bayesian score follows a normal distribution and is different from the prediction using a cutoff.

Enrichment: An estimate of enrichment, that is, the increased likelihood (versus random) of this sample being in the category.

Bayesian Score: The standard Laplacian-modified Bayesian score.

Mahalanobis Distance: The Mahalanobis distance (MD) is the distance to the center of the training data. The larger the MD, the less trustworthy the prediction.

Mahalanobis Distance p-value: The p-value gives the fraction of training data with an MD greater than or equal to the one for the given sample, assuming normally distributed data. The smaller the p-value, the less trustworthy the prediction. For highly non-normal X properties (e.g., fingerprints), the MD p-value is wildly inaccurate.

**Structural Similar Compounds**

| Name               | ANTHRAQUINONE;1-(2;4;6-TRIMETHYLPHENYLAMINO)- | BENZILIC ACID; 4;4'-DICHLORO-; ISOPROPYL ESTER | 4;4'-DICHLORO-2-NITROBIPHENYL ETHER |
|--------------------|-----------------------------------------------|------------------------------------------------|-------------------------------------|
| Structure          |                                               |                                                |                                     |
| Actual Endpoint    | Moderate                                      | Severe                                         | Moderate                            |
| Predicted Endpoint | Moderate                                      | Severe                                         | Moderate                            |
| Distance           | 0.588                                         | 0.605                                          | 0.722                               |
| Reference          | 28ZPAK-;242;72                                | CIGET* -; ;77                                  | 28ZPAK-;84;72                       |

**Model Applicability**

Unknown features are fingerprint features in the query molecule, but not found or appearing too infrequently in the training set.

- All properties and OPS components are within expected ranges.

**Feature Contribution****Top features for positive contribution**

| Fingerprint | Bit/Smiles  | Feature Structure | Score | Severe in training set |
|-------------|-------------|-------------------|-------|------------------------|
| SCFP_12     | -1272709286 |                   | 0.231 | 24 out of 31           |

|                                               |                   |                                                                                                                                                         |              |                               |
|-----------------------------------------------|-------------------|---------------------------------------------------------------------------------------------------------------------------------------------------------|--------------|-------------------------------|
| SCFP_12                                       | 341480432         | <p>AND Enantiomer</p> 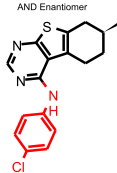 <p>[*]N[c]1:[cH]:[cH]:[c](Cl):[cH]:[cH]:1</p> | 0.218        | 1 out of 1                    |
| SCFP_12                                       | -1378360678       | <p>AND Enantiomer</p>  <p>[*][c]1:[*]:[cH]:[c](Cl):[cH]:[cH]:1</p>   | 0.211        | 22 out of 29                  |
| <b>Top Features for negative contribution</b> |                   |                                                                                                                                                         |              |                               |
| <b>Fingerprint</b>                            | <b>Bit/Smiles</b> | <b>Feature Structure</b>                                                                                                                                | <b>Score</b> | <b>Severe in training set</b> |
| SCFP_12                                       | 1310748454        | <p>AND Enantiomer</p>  <p>[*][c]1:[*]:[*]:[c](:[*]):s:1</p>          | -1.04        | 0 out of 3                    |
| SCFP_12                                       | 951581613         | <p>AND Enantiomer</p>  <p>[*]:[c](:[*])N[c](:[*]):[*]</p>           | -0.769       | 2 out of 9                    |
| SCFP_12                                       | 1334669481        | <p>AND Enantiomer</p>  <p>[*]N[c](:[cH]):-[*]:[cH]:[*]</p>         | -0.685       | 28 out of 93                  |

5b

## TOPKAT\_Ocular\_Irritancy\_Moderate\_vs\_Severe

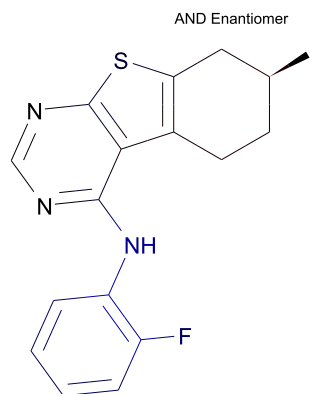C<sub>17</sub>H<sub>16</sub>FN<sub>3</sub>S

Molecular Weight: 313.39244

ALogP: 5.041

Rotatable Bonds: 2

Acceptors: 3

Donors: 1

**Model Prediction**

Prediction: Moderate

Probability: 0.452

Enrichment: 0.729

Bayesian Score: -4.89

Mahalanobis Distance: 9.1

Mahalanobis Distance p-value: 0.287

Prediction: Positive if the Bayesian score is above the estimated best cutoff value from minimizing the false positive and false negative rate.

Probability: The estimated probability that the sample is in the positive category. This assumes that the Bayesian score follows a normal distribution and is different from the prediction using a cutoff.

Enrichment: An estimate of enrichment, that is, the increased likelihood (versus random) of this sample being in the category.

Bayesian Score: The standard Laplacian-modified Bayesian score.

Mahalanobis Distance: The Mahalanobis distance (MD) is the distance to the center of the training data. The larger the MD, the less trustworthy the prediction.

Mahalanobis Distance p-value: The p-value gives the fraction of training data with an MD greater than or equal to the one for the given sample, assuming normally distributed data. The smaller the p-value, the less trustworthy the prediction. For highly non-normal X properties (e.g., fingerprints), the MD p-value is wildly inaccurate.

**Structural Similar Compounds**

| Name               | ANTHRAQUINONE;1-(2;4;6-TRIMETHYLPHENYLAMINO)- | BENZILIC ACID; 4;4'-DICHLORO-; ISOPROPYL ESTER | ACETIC ACID; 2-(-CHLOROMETHYL-1-NAPHTHYLTHIO)- |
|--------------------|-----------------------------------------------|------------------------------------------------|------------------------------------------------|
| Structure          |                                               |                                                |                                                |
| Actual Endpoint    | Moderate                                      | Severe                                         | Severe                                         |
| Predicted Endpoint | Moderate                                      | Severe                                         | Severe                                         |
| Distance           | 0.621                                         | 0.626                                          | 0.679                                          |
| Reference          | 28ZPAK-;242;72                                | CIGET* -;77                                    | 28ZPAK-;173;72                                 |

**Model Applicability**

Unknown features are fingerprint features in the query molecule, but not found or appearing too infrequently in the training set.

- All properties and OPS components are within expected ranges.

**Feature Contribution****Top features for positive contribution**

| Fingerprint | Bit/Smiles  | Feature Structure                                    | Score | Severe in training set |
|-------------|-------------|------------------------------------------------------|-------|------------------------|
| SCFP_12     | -1272709286 | <p>AND Enantiomer</p> <p>[*]C([*])C[c](:[*]):[*]</p> | 0.231 | 24 out of 31           |

|                                               |                   |                                                                                                                                                                |              |                               |
|-----------------------------------------------|-------------------|----------------------------------------------------------------------------------------------------------------------------------------------------------------|--------------|-------------------------------|
| SCFP_12                                       | -1849867720       | <p>AND Enantiomer</p>  <p><chem>[*]C@@H1[*]c2[*]:[*]c([*])c2:CC1</chem></p> | 0.168        | 16 out of 22                  |
| SCFP_12                                       | -1272798659       | <p>AND Enantiomer</p>  <p><chem>[*]CCC([*])[*]</chem></p>                   | 0.139        | 216 out of 309                |
| <b>Top Features for negative contribution</b> |                   |                                                                                                                                                                |              |                               |
| <b>Fingerprint</b>                            | <b>Bit/Smiles</b> | <b>Feature Structure</b>                                                                                                                                       | <b>Score</b> | <b>Severe in training set</b> |
| SCFP_12                                       | 1310748454        | <p>AND Enantiomer</p>  <p><chem>[*]c1:[*]:[*]:c(:[*]):s:1</chem></p>        | -1.04        | 0 out of 3                    |
| SCFP_12                                       | 951581613         | <p>AND Enantiomer</p>  <p><chem>[*]:c(:[*])Nc(:[*]):[*]</chem></p>         | -0.769       | 2 out of 9                    |
| SCFP_12                                       | 1334669481        | <p>AND Enantiomer</p>  <p><chem>[*]N[c](:[cH]:[*]):[cH]:[*]</chem></p>    | -0.685       | 28 out of 93                  |

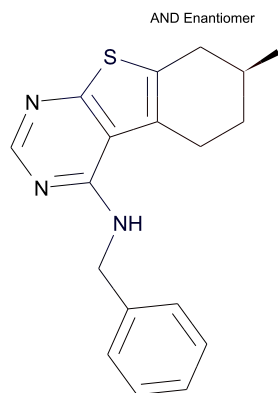

$C_{18}H_{19}N_3S$

Molecular Weight: 309.42856

ALogP: 4.678

Rotatable Bonds: 3

Acceptors: 3

Donors: 1

## Model Prediction

Prediction: Moderate

Probability: 0.641

Enrichment: 1.03

Bayesian Score: -1.34

Mahalanobis Distance: 8.92

Mahalanobis Distance p-value: 0.375

Prediction: Positive if the Bayesian score is above the estimated best cutoff value from minimizing the false positive and false negative rate.

Probability: The estimated probability that the sample is in the positive category. This assumes that the Bayesian score follows a normal distribution and is different from the prediction using a cutoff.

Enrichment: An estimate of enrichment, that is, the increased likelihood (versus random) of this sample being in the category.

Bayesian Score: The standard Laplacian-modified Bayesian score.

Mahalanobis Distance: The Mahalanobis distance (MD) is the distance to the center of the training data. The larger the MD, the less trustworthy the prediction.

Mahalanobis Distance p-value: The p-value gives the fraction of training data with an MD greater than or equal to the one for the given sample, assuming normally distributed data. The smaller the p-value, the less trustworthy the prediction. For highly non-normal X properties (e.g., fingerprints), the MD p-value is wildly inaccurate.

## Structural Similar Compounds

| Name               | BENZILIC ACID; 4;4'-DICHLORO-; ISOPROPYL ESTER | ACETIC ACID; 2-(-CHLOROMETHY-1-NAPHTHYLTHIO)- | ANTHRAQUINONE;1-(2;4;6-TRIMETHYLPHENYLAMINO)- |
|--------------------|------------------------------------------------|-----------------------------------------------|-----------------------------------------------|
| Structure          |                                                |                                               |                                               |
| Actual Endpoint    | Severe                                         | Severe                                        | Moderate                                      |
| Predicted Endpoint | Severe                                         | Severe                                        | Moderate                                      |
| Distance           | 0.598                                          | 0.635                                         | 0.655                                         |
| Reference          | CIGET* -;-;77                                  | 28ZPAK-;173;72                                | 28ZPAK-;242;72                                |

## Model Applicability

Unknown features are fingerprint features in the query molecule, but not found or appearing too infrequently in the training set.

- All properties and OPS components are within expected ranges.

## Feature Contribution

### Top features for positive contribution

| Fingerprint | Bit/Smiles  | Feature Structure                        | Score | Severe in training set |
|-------------|-------------|------------------------------------------|-------|------------------------|
| SCFP_12     | -1272709286 | <br><chem>[*]C([*])C[c](-[*]):[*]</chem> | 0.231 | 24 out of 31           |



|                                               |                   |                                                                                                                                                                 |              |                               |
|-----------------------------------------------|-------------------|-----------------------------------------------------------------------------------------------------------------------------------------------------------------|--------------|-------------------------------|
| SCFP_12                                       | -1849867720       | <p>AND Enantiomer</p> 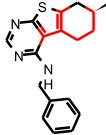 <p><chem>*[C@@H]1[*]c2[*]:[*]c[*]c[*]c2CC1</chem></p> | 0.168        | 16 out of 22                  |
| SCFP_12                                       | -1272798659       | <p>AND Enantiomer</p>  <p><chem>*]CCC[*][*]</chem></p>                       | 0.139        | 216 out of 309                |
| <b>Top Features for negative contribution</b> |                   |                                                                                                                                                                 |              |                               |
| <b>Fingerprint</b>                            | <b>Bit/Smiles</b> | <b>Feature Structure</b>                                                                                                                                        | <b>Score</b> | <b>Severe in training set</b> |
| SCFP_12                                       | 1310748454        | <p>AND Enantiomer</p>  <p><chem>*]c]1:[*]:[*]:c(:[*]:s:1</chem></p>          | -1.04        | 0 out of 3                    |
| SCFP_12                                       | 18117904          | <p>AND Enantiomer</p>  <p><chem>*]CN[c(:[*]:[*]</chem></p>                 | -0.481       | 3 out of 9                    |
| SCFP_12                                       | 10                | <p>AND Enantiomer</p>  <p><chem>*]N[*]</chem></p>                          | -0.451       | 43 out of 112                 |

5a

TOPKAT\_Ocular\_Irritancy\_None\_vs\_Irritant

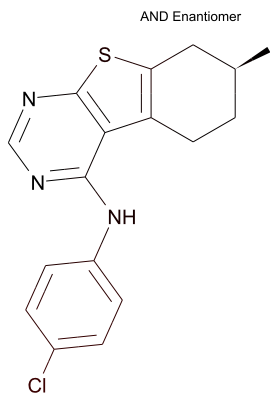C<sub>17</sub>H<sub>16</sub>ClN<sub>3</sub>S

Molecular Weight: 329.84704

ALogP: 5.5

Rotatable Bonds: 2

Acceptors: 3

Donors: 1

## Model Prediction

**Prediction: Irritant**

Probability: 1

Enrichment: 1.18

Bayesian Score: 1.98

Mahalanobis Distance: 7.8

Mahalanobis Distance p-value: 0.958

Prediction: Positive if the Bayesian score is above the estimated best cutoff value from minimizing the false positive and false negative rate.

Probability: The estimated probability that the sample is in the positive category. This assumes that the Bayesian score follows a normal distribution and is different from the prediction using a cutoff.

Enrichment: An estimate of enrichment, that is, the increased likelihood (versus random) of this sample being in the category. Bayesian Score: The standard Laplacian-modified Bayesian score.

Mahalanobis Distance: The Mahalanobis distance (MD) is the distance to the center of the training data. The larger the MD, the less trustworthy the prediction.

Mahalanobis Distance p-value: The p-value gives the fraction of training data with an MD greater than or equal to the one for the given sample, assuming normally distributed data. The smaller the p-value, the less trustworthy the prediction. For highly non-normal X properties (e.g., fingerprints), the MD p-value is wildly inaccurate.

## Structural Similar Compounds

| Name               | ANTHRAQUINONE;1-(2;4;6-TRIMETHYLPHENYLAMINO)- | BENZAMIDE; N-(5-CHLORO-1-ANTHRAQUINONYL)- | N;S-DIBENZOYL-O-AMINOTHIOPHENOL |
|--------------------|-----------------------------------------------|-------------------------------------------|---------------------------------|
| Structure          |                                               |                                           |                                 |
| Actual Endpoint    | Irritant                                      | Irritant                                  | Irritant                        |
| Predicted Endpoint | Irritant                                      | Irritant                                  | Irritant                        |
| Distance           | 0.584                                         | 0.584                                     | 0.585                           |
| Reference          | 28ZPAK-;242;72                                | 28ZPAK 89;72                              | 28ZPAK-;175;72                  |

## Model Applicability

Unknown features are fingerprint features in the query molecule, but not found or appearing too infrequently in the training set.

- All properties and OPS components are within expected ranges.
- Unknown FCFP\_2 feature: -1564473960: [\*]:n:[c]1:s:[\*]:[\*]:[c]:1:[\*]
- Unknown FCFP\_2 feature: -124685461: [\*]:n:c:n:[\*]
- Unknown FCFP\_2 feature: -1151884458: [\*]N[c](:n:[\*]):[c](:[\*]):[\*]

## Feature Contribution

| Top features for positive contribution |            |                                   |       |                          |
|----------------------------------------|------------|-----------------------------------|-------|--------------------------|
| Fingerprint                            | Bit/Smiles | Feature Structure                 | Score | Irritant in training set |
| FCFP_12                                | 1747237384 | <br>[*][c]1:[*]:[*]:[c](:[*]):s:1 | 0.208 | 44 out of 44             |

|                                               |                   |                                                                                                                                                             |              |                                 |
|-----------------------------------------------|-------------------|-------------------------------------------------------------------------------------------------------------------------------------------------------------|--------------|---------------------------------|
| FCFP_12                                       | -1508180856       | <p>AND Enantiomer</p> 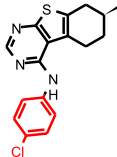 <p>[*][c]1:[cH]:[cH]:[c]<br/>(Cl):[cH]:[cH]:1</p> | 0.2          | 17 out of 17                    |
| FCFP_12                                       | -1539132615       | <p>AND Enantiomer</p>  <p>[*]C[c]1:s:[*]:[*]:[c<br/>]:1[*]</p>           | 0.197        | 13 out of 13                    |
| <b>Top Features for negative contribution</b> |                   |                                                                                                                                                             |              |                                 |
| <b>Fingerprint</b>                            | <b>Bit/Smiles</b> | <b>Feature Structure</b>                                                                                                                                    | <b>Score</b> | <b>Irritant in training set</b> |
| FCFP_12                                       | 0                 | <p>AND Enantiomer</p>  <p>[*]C[*]</p>                                    | 0            | 1184 out of 1397                |
| FCFP_12                                       | -1272798659       | <p>AND Enantiomer</p>  <p>[*]CCC([*])[*]</p>                            | 0            | 517 out of 643                  |
| FCFP_12                                       | -1043339860       | <p>AND Enantiomer</p>  <p>[*]CC(C)C[*]</p>                             | 0            | 146 out of 186                  |

5b

TOPKAT\_Ocular\_Irritancy\_None\_vs\_Irritant

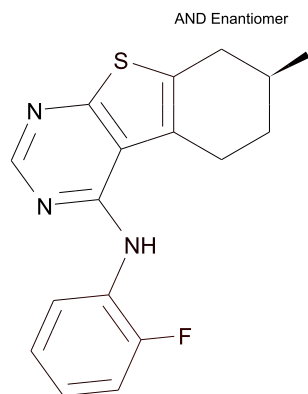C<sub>17</sub>H<sub>16</sub>FN<sub>3</sub>S

Molecular Weight: 313.39244

ALogP: 5.041

Rotatable Bonds: 2

Acceptors: 3

Donors: 1

## Model Prediction

Prediction: Irritant

Probability: 1

Enrichment: 1.18

Bayesian Score: 1.75

Mahalanobis Distance: 7.67

Mahalanobis Distance p-value: 0.972

Prediction: Positive if the Bayesian score is above the estimated best cutoff value from minimizing the false positive and false negative rate.

Probability: The estimated probability that the sample is in the positive category. This assumes that the Bayesian score follows a normal distribution and is different from the prediction using a cutoff.

Enrichment: An estimate of enrichment, that is, the increased likelihood (versus random) of this sample being in the category.

Bayesian Score: The standard Laplacian-modified Bayesian score.

Mahalanobis Distance: The Mahalanobis distance (MD) is the distance to the center of the training data. The larger the MD, the less trustworthy the prediction.

Mahalanobis Distance p-value: The p-value gives the fraction of training data with an MD greater than or equal to the one for the given sample, assuming normally distributed data. The smaller the p-value, the less trustworthy the prediction. For highly non-normal X properties (e.g., fingerprints), the MD p-value is wildly inaccurate.

## Structural Similar Compounds

| Name               | N;S-DIBENZOYL-O-AMINOTHIOPHENOL | BENZAMIDE; N-(5-CHLORO-1-ANTHRAQUINONYL)- | BENZILIC ACID; 4;4'-DICHLORO-; ISOPROPYL ESTER |
|--------------------|---------------------------------|-------------------------------------------|------------------------------------------------|
| Structure          |                                 |                                           |                                                |
| Actual Endpoint    | Irritant                        | Irritant                                  | Irritant                                       |
| Predicted Endpoint | Irritant                        | Irritant                                  | Irritant                                       |
| Distance           | 0.557                           | 0.566                                     | 0.595                                          |
| Reference          | 28ZPAK-;175;72                  | 28ZPAK 89;72                              | CIGET* -; ;77                                  |

## Model Applicability

Unknown features are fingerprint features in the query molecule, but not found or appearing too infrequently in the training set.

1. All properties and OPS components are within expected ranges.
2. Unknown FCFP\_2 feature: -1564473960: [\*]:n:[c]1:s:[\*]:[\*]:[c]:1:[\*]
3. Unknown FCFP\_2 feature: -124685461: [\*]:n:c:n:[\*]
4. Unknown FCFP\_2 feature: -1151884458: [\*]N[c](:n:[\*]):[c](:[\*]):[\*]

## Feature Contribution

### Top features for positive contribution

| Fingerprint | Bit/Smiles | Feature Structure                                          | Score | Irritant in training set |
|-------------|------------|------------------------------------------------------------|-------|--------------------------|
| FCFP_12     | 1747237384 | <p>AND Enantiomer</p> <p>[*][c]1:[*]:[*]:[c](:[*]):s:1</p> | 0.208 | 44 out of 44             |

|                                               |                   |                                                                                                                                                           |              |                                 |
|-----------------------------------------------|-------------------|-----------------------------------------------------------------------------------------------------------------------------------------------------------|--------------|---------------------------------|
| FCFP_12                                       | -1539132615       | <p>AND Enantiomer</p> 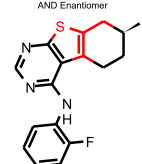 <p><chem>[*]C[c]1:s:[*]:[*]:[c]:1[*]</chem></p> | 0.197        | 13 out of 13                    |
| FCFP_12                                       | 17                | <p>AND Enantiomer</p>  <p><chem>[*]:s:[*]</chem></p>                   | 0.189        | 48 out of 49                    |
| <b>Top Features for negative contribution</b> |                   |                                                                                                                                                           |              |                                 |
| <b>Fingerprint</b>                            | <b>Bit/Smiles</b> | <b>Feature Structure</b>                                                                                                                                  | <b>Score</b> | <b>Irritant in training set</b> |
| FCFP_12                                       | 0                 | <p>AND Enantiomer</p>  <p><chem>[*]C[*]</chem></p>                     | 0            | 1184 out of 1397                |
| FCFP_12                                       | -1272798659       | <p>AND Enantiomer</p>  <p><chem>[*]CCC([*])[*]</chem></p>             | 0            | 517 out of 643                  |
| FCFP_12                                       | -1043339860       | <p>AND Enantiomer</p>  <p><chem>[*]CC(C)C[*]</chem></p>              | 0            | 146 out of 186                  |

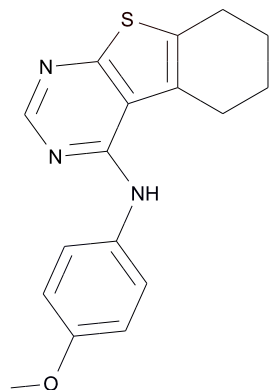

$C_{17}H_{17}N_3OS$

Molecular Weight: 311.40138

ALogP: 4.568

Rotatable Bonds: 3

Acceptors: 4

Donors: 1

## Model Prediction

**Prediction: Irritant**

Probability: 1

Enrichment: 1.18

Bayesian Score: 0.616

Mahalanobis Distance: 7.11

Mahalanobis Distance p-value: 0.997

Prediction: Positive if the Bayesian score is above the estimated best cutoff value from minimizing the false positive and false negative rate.

Probability: The estimated probability that the sample is in the positive category. This assumes that the Bayesian score follows a normal distribution and is different from the prediction using a cutoff.

Enrichment: An estimate of enrichment, that is, the increased likelihood (versus random) of this sample being in the category.

Bayesian Score: The standard Laplacian-modified Bayesian score.

Mahalanobis Distance: The Mahalanobis distance (MD) is the distance to the center of the training data. The larger the MD, the less trustworthy the prediction.

Mahalanobis Distance p-value: The p-value gives the fraction of training data with an MD greater than or equal to the one for the given sample, assuming normally distributed data. The smaller the p-value, the less trustworthy the prediction. For highly non-normal X properties (e.g., fingerprints), the MD p-value is wildly inaccurate.

## Structural Similar Compounds

| Name               | N;S-DIBENZOYL-O-AMINOTHIOPHENOL | 1-BENZOYLAMINO-4-METHOXY-5-CHLORANTHRAQUINONE | BENZAMIDE; N-(5-CHLORO-1-ANTHRAQUINONYL)- |
|--------------------|---------------------------------|-----------------------------------------------|-------------------------------------------|
| Structure          |                                 |                                               |                                           |
| Actual Endpoint    | Irritant                        | Irritant                                      | Irritant                                  |
| Predicted Endpoint | Irritant                        | Irritant                                      | Irritant                                  |
| Distance           | 0.572                           | 0.604                                         | 0.618                                     |
| Reference          | 28ZPAK-;175;72                  | 28ZPAK-;90;72                                 | 28ZPAK 89;72                              |

## Model Applicability

Unknown features are fingerprint features in the query molecule, but not found or appearing too infrequently in the training set.

1. All properties and OPS components are within expected ranges.
2. Unknown FCFP\_2 feature: -1564473960: [\*]:n:[c]1:s:[\*]:[\*]:[c]:1:[\*]
3. Unknown FCFP\_2 feature: -124685461: [\*]:n:c:n:[\*]
4. Unknown FCFP\_2 feature: -1151884458: [\*]N[c](:n:[\*]):[c](:[\*]):[\*]

## Feature Contribution

### Top features for positive contribution

| Fingerprint | Bit/Smiles | Feature Structure                 | Score | Irritant in training set |
|-------------|------------|-----------------------------------|-------|--------------------------|
| FCFP_12     | 1747237384 | <br>[*][c]1:[*]:[*]:[c](:[*]):s:1 | 0.208 | 44 out of 44             |

|                                               |                   |                                                                                                                                                       |              |                                 |
|-----------------------------------------------|-------------------|-------------------------------------------------------------------------------------------------------------------------------------------------------|--------------|---------------------------------|
| FCFP_12                                       | -1539132615       | 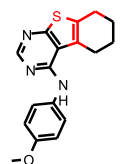<br><chem>[*]C[c]1:s:[*]:[*]:[c]:1[*]</chem>                       | 0.197        | 13 out of 13                    |
| FCFP_12                                       | 17                | <br><chem>[*]:s:[*]</chem>                                         | 0.189        | 48 out of 49                    |
| <b>Top Features for negative contribution</b> |                   |                                                                                                                                                       |              |                                 |
| <b>Fingerprint</b>                            | <b>Bit/Smiles</b> | <b>Feature Structure</b>                                                                                                                              | <b>Score</b> | <b>Irritant in training set</b> |
| FCFP_12                                       | -1060187936       | <br><chem>[*]N[c]1:[cH]:[cH]:[c](OC):[cH]:[cH]:1</chem>            | -0.344       | 2 out of 4                      |
| FCFP_12                                       | 414792462         | <br><chem>[*]O[c]1:[cH]:[cH]:[c](N(c:[*]:[*]):[c]H):[cH]:1</chem> | -0.268       | 1 out of 2                      |
| FCFP_12                                       | -1909820884       | <br><chem>[*]:[c]1:[*]:[*]:[c]2CCCC[c]:1:2</chem>                | -0.268       | 1 out of 2                      |

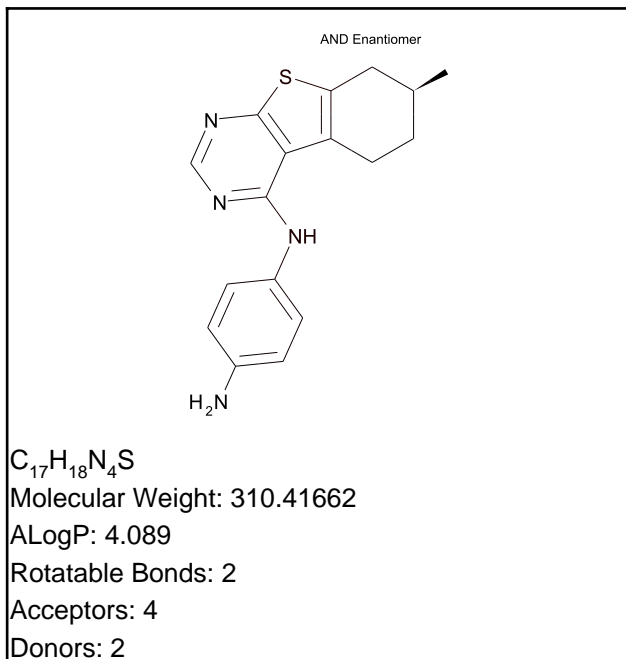

### Model Prediction

**Prediction: Irritant**

Probability: 1

Enrichment: 1.18

Bayesian Score: 1.13

Mahalanobis Distance: 7.73

Mahalanobis Distance p-value: 0.966

Prediction: Positive if the Bayesian score is above the estimated best cutoff value from minimizing the false positive and false negative rate.

Probability: The estimated probability that the sample is in the positive category. This assumes that the Bayesian score follows a normal distribution and is different from the prediction using a cutoff.

Enrichment: An estimate of enrichment, that is, the increased likelihood (versus random) of this sample being in the category.

Bayesian Score: The standard Laplacian-modified Bayesian score.

Mahalanobis Distance: The Mahalanobis distance (MD) is the distance to the center of the training data. The larger the MD, the less trustworthy the prediction.

Mahalanobis Distance p-value: The p-value gives the fraction of training data with an MD greater than or equal to the one for the given sample, assuming normally distributed data. The smaller the p-value, the less trustworthy the prediction. For highly non-normal X properties (e.g., fingerprints), the MD p-value is wildly inaccurate.

### Structural Similar Compounds

| Name               | ANTHRAQUINONE; 1-AMINO-4-HYDROXY-2-PHENOXY- | 1-AMINO-4-BENZOYLAMINO-ANTHRAQUINONE | Anthraquinone; 1-amino-2-bromo-4-hydroxy-                              |
|--------------------|---------------------------------------------|--------------------------------------|------------------------------------------------------------------------|
| Structure          |                                             |                                      |                                                                        |
| Actual Endpoint    | Irritant                                    | Irritant                             | Non-Irritant                                                           |
| Predicted Endpoint | Irritant                                    | Irritant                             | Non-Irritant                                                           |
| Distance           | 0.590                                       | 0.595                                | 0.618                                                                  |
| Reference          | 28ZPAK 239;72                               | 28ZPAK-;124;72                       | Prehled Prumyslove Toxikologie; Organicke Latky; Marhold; J. pp 535;86 |

### Model Applicability

Unknown features are fingerprint features in the query molecule, but not found or appearing too infrequently in the training set.

1. All properties and OPS components are within expected ranges.
2. Unknown FCFP\_2 feature: -1564473960: [\*]:n:[c]1:s:[\*]:[\*]:[c]:1:[\*]
3. Unknown FCFP\_2 feature: -124685461: [\*]:n:c:n:[\*]
4. Unknown FCFP\_2 feature: -1151884458: [\*]N[c](:n:[\*]):[c](:[\*]):[\*]

### Feature Contribution

#### Top features for positive contribution

| Fingerprint | Bit/Smiles | Feature Structure | Score | Irritant in training set |
|-------------|------------|-------------------|-------|--------------------------|
|             |            |                   |       |                          |



|         |             |                                                                                                                                                     |       |              |
|---------|-------------|-----------------------------------------------------------------------------------------------------------------------------------------------------|-------|--------------|
| FCFP_12 | 1747237384  | <p>AND Enantiomer</p> 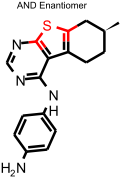 <p>[*][c]1:[*]:[*]:[c](:<br/>[*]):s:1</p> | 0.208 | 44 out of 44 |
| FCFP_12 | -1539132615 | <p>AND Enantiomer</p>  <p>[*]C[c]1:s:[*]:[*]:[c<br/>]:1[*]</p>   | 0.197 | 13 out of 13 |
| FCFP_12 | 17          | <p>AND Enantiomer</p>  <p>[*]:s:[*]</p>                          | 0.189 | 48 out of 49 |

**Top Features for negative contribution**

| Fingerprint | Bit/Smiles  | Feature Structure                                                                                                                                           | Score   | Irritant in training set |
|-------------|-------------|-------------------------------------------------------------------------------------------------------------------------------------------------------------|---------|--------------------------|
| FCFP_12     | 880832703   | <p>AND Enantiomer</p> 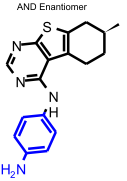 <p>[*][c]1:[cH]:[cH]:[c]<br/>(N):[cH]:[cH]:1</p> | -0.0697 | 15 out of 20             |
| FCFP_12     | -1272798659 | <p>AND Enantiomer</p>  <p>[*]CCC([*])[*]</p>                           | 0       | 517 out of 643           |

|         |             |                                                                                                                                            |   |                |
|---------|-------------|--------------------------------------------------------------------------------------------------------------------------------------------|---|----------------|
| FCFP_12 | -1043339860 | <p>AND Enantiomer</p> 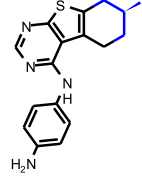 <p><chem>[*]CC(C)C[*]</chem></p> | 0 | 146 out of 186 |
|---------|-------------|--------------------------------------------------------------------------------------------------------------------------------------------|---|----------------|

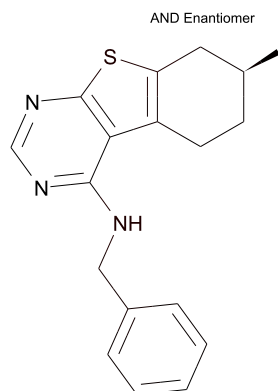

$C_{18}H_{19}N_3S$

Molecular Weight: 309.42856

ALogP: 4.678

Rotatable Bonds: 3

Acceptors: 3

Donors: 1

## Model Prediction

**Prediction: Irritant**

Probability: 1

Enrichment: 1.18

Bayesian Score: 1.35

Mahalanobis Distance: 7.49

Mahalanobis Distance p-value: 0.986

Prediction: Positive if the Bayesian score is above the estimated best cutoff value from minimizing the false positive and false negative rate.

Probability: The estimated probability that the sample is in the positive category. This assumes that the Bayesian score follows a normal distribution and is different from the prediction using a cutoff.

Enrichment: An estimate of enrichment, that is, the increased likelihood (versus random) of this sample being in the category.

Bayesian Score: The standard Laplacian-modified Bayesian score.

Mahalanobis Distance: The Mahalanobis distance (MD) is the distance to the center of the training data. The larger the MD, the less trustworthy the prediction.

Mahalanobis Distance p-value: The p-value gives the fraction of training data with an MD greater than or equal to the one for the given sample, assuming normally distributed data. The smaller the p-value, the less trustworthy the prediction. For highly non-normal X properties (e.g., fingerprints), the MD p-value is wildly inaccurate.

## Structural Similar Compounds

| Name               | N;S-DIBENZOYL-O-AMINOTHIOPHENOL | BENZAMIDE; N-(5-CHLORO-1-ANTHRAQUINONYL)- | BENZILIC ACID; 4;4'-DICHLORO-; ISOPROPYL ESTER |
|--------------------|---------------------------------|-------------------------------------------|------------------------------------------------|
| Structure          |                                 |                                           |                                                |
| Actual Endpoint    | Irritant                        | Irritant                                  | Irritant                                       |
| Predicted Endpoint | Irritant                        | Irritant                                  | Irritant                                       |
| Distance           | 0.526                           | 0.564                                     | 0.590                                          |
| Reference          | 28ZPAK-;175;72                  | 28ZPAK 89;72                              | CIGET* -;--;77                                 |

## Model Applicability

Unknown features are fingerprint features in the query molecule, but not found or appearing too infrequently in the training set.

1. All properties and OPS components are within expected ranges.
2. Unknown FCFP\_2 feature: -1564473960: [\*]:n:[c]1:s:[\*]:[\*]:[c]:1:[\*]
3. Unknown FCFP\_2 feature: -124685461: [\*]:n:c:n:[\*]
4. Unknown FCFP\_2 feature: -1151884458: [\*]N[c](:n:[\*]):[c](:[\*]):[\*]

## Feature Contribution

### Top features for positive contribution

| Fingerprint | Bit/Smiles | Feature Structure                 | Score | Irritant in training set |
|-------------|------------|-----------------------------------|-------|--------------------------|
| FCFP_12     | 1747237384 | <br>[*][c]1:[*]:[*]:[c](:[*]):s:1 | 0.208 | 44 out of 44             |

|                                               |                   |                                                                                                                                                                        |              |                                 |
|-----------------------------------------------|-------------------|------------------------------------------------------------------------------------------------------------------------------------------------------------------------|--------------|---------------------------------|
| FCFP_12                                       | -1539132615       | <p>AND Enantiomer</p> 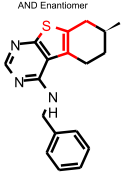 <p><chem>[*]C[c]1:s:[*]:[*]:[c]:1[*]</chem></p>              | 0.197        | 13 out of 13                    |
| FCFP_12                                       | 17                | <p>AND Enantiomer</p>  <p><chem>[*]:s:[*]</chem></p>                                | 0.189        | 48 out of 49                    |
| <b>Top Features for negative contribution</b> |                   |                                                                                                                                                                        |              |                                 |
| <b>Fingerprint</b>                            | <b>Bit/Smiles</b> | <b>Feature Structure</b>                                                                                                                                               | <b>Score</b> | <b>Irritant in training set</b> |
| FCFP_12                                       | -1698724694       | <p>AND Enantiomer</p>  <p><chem>[*]C[c]1:[cH]:[cH]:[cH]:[cH]:[cH]:[cH]:1</chem></p> | -0.0964      | 107 out of 146                  |
| FCFP_12                                       | -1272798659       | <p>AND Enantiomer</p>  <p><chem>[*]CCC([*])[*]</chem></p>                          | 0            | 517 out of 643                  |
| FCFP_12                                       | -1043339860       | <p>AND Enantiomer</p>  <p><chem>[*]CC(C)C[*]</chem></p>                           | 0            | 146 out of 186                  |

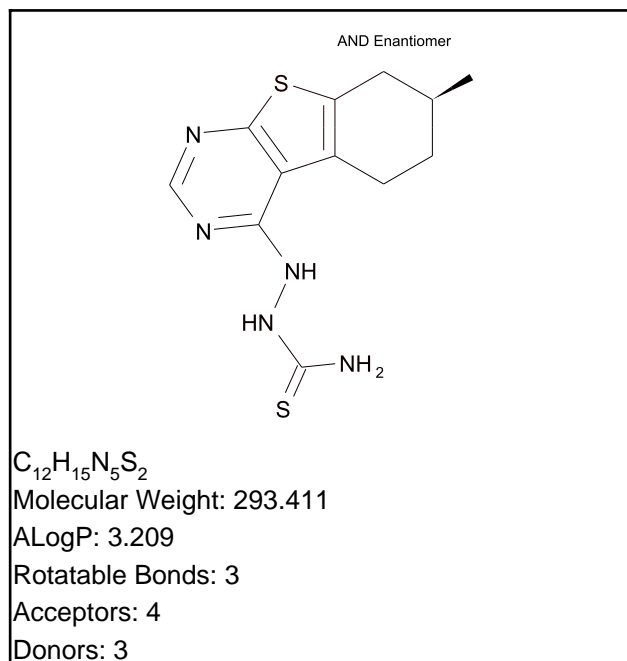

### Model Prediction

**Prediction: Irritant**

Probability: 1

Enrichment: 1.18

Bayesian Score: 1.04

Mahalanobis Distance: 7.39

Mahalanobis Distance p-value: 0.99

Prediction: Positive if the Bayesian score is above the estimated best cutoff value from minimizing the false positive and false negative rate.

Probability: The estimated probability that the sample is in the positive category. This assumes that the Bayesian score follows a normal distribution and is different from the prediction using a cutoff.

Enrichment: An estimate of enrichment, that is, the increased likelihood (versus random) of this sample being in the category.

Bayesian Score: The standard Laplacian-modified Bayesian score.

Mahalanobis Distance: The Mahalanobis distance (MD) is the distance to the center of the training data. The larger the MD, the less trustworthy the prediction.

Mahalanobis Distance p-value: The p-value gives the fraction of training data with an MD greater than or equal to the one for the given sample, assuming normally distributed data. The smaller the p-value, the less trustworthy the prediction. For highly non-normal X properties (e.g., fingerprints), the MD p-value is wildly inaccurate.

### Structural Similar Compounds

| Name               | 1;2;4-TRIHIDROXY ANTHRAQUINONE                                                      | 2-NAPHTHALENESULFONIC ACID; 4-HYDROXY-7-(METHYLAMINO)-                              | 1-Naphthalenesulfonic acid; 4-amino-5-hydroxy-                                      |
|--------------------|-------------------------------------------------------------------------------------|-------------------------------------------------------------------------------------|-------------------------------------------------------------------------------------|
| Structure          | 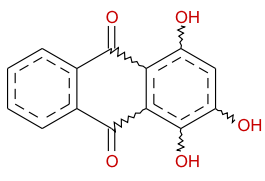 |  |  |
| Actual Endpoint    | Irritant                                                                            | Irritant                                                                            | Non-Irritant                                                                        |
| Predicted Endpoint | Irritant                                                                            | Irritant                                                                            | Non-Irritant                                                                        |
| Distance           | 0.664                                                                               | 0.669                                                                               | 0.695                                                                               |
| Reference          | 28ZPAK-;103;7                                                                       | 28ZPAK 190;72                                                                       | Prehled Prumyslove Toxikologie; Organicke Latky; Marhold; J. pp 1057;86             |

### Model Applicability

Unknown features are fingerprint features in the query molecule, but not found or appearing too infrequently in the training set.

1. All properties and OPS components are within expected ranges.
2. Unknown FCFP\_2 feature: -1564473960: [\*]:n:[c]1:s:[\*]:[\*]:[c]:1:[\*]
3. Unknown FCFP\_2 feature: -124685461: [\*]:n:c:n:[\*]
4. Unknown FCFP\_2 feature: -1151884458: [\*]N[c](:n:[\*]):[c](:[\*]):[\*]
5. Unknown FCFP\_2 feature: -885461129: [\*]NNC(=[\*])[\*]

### Feature Contribution

#### Top features for positive contribution

| Fingerprint | Bit/Smiles | Feature Structure | Score | Irritant in training set |
|-------------|------------|-------------------|-------|--------------------------|
|             |            |                   |       |                          |

|                                               |                   |                                                                                                                                                             |              |                                 |
|-----------------------------------------------|-------------------|-------------------------------------------------------------------------------------------------------------------------------------------------------------|--------------|---------------------------------|
| FCFP_12                                       | 1747237384        | <p>AND Enantiomer</p> 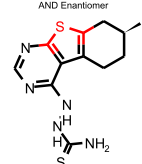 <p><chem>[*][c]1:[*]:[*]:[c](:[*]):s:1</chem></p> | 0.208        | 44 out of 44                    |
| FCFP_12                                       | -1539132615       | <p>AND Enantiomer</p>  <p><chem>[*]C[c]1:s:[*]:[*]:[c]:1[*]</chem></p>   | 0.197        | 13 out of 13                    |
| FCFP_12                                       | 17                | <p>AND Enantiomer</p>  <p><chem>[*]:s:[*]</chem></p>                     | 0.189        | 48 out of 49                    |
| <b>Top Features for negative contribution</b> |                   |                                                                                                                                                             |              |                                 |
| <b>Fingerprint</b>                            | <b>Bit/Smiles</b> | <b>Feature Structure</b>                                                                                                                                    | <b>Score</b> | <b>Irritant in training set</b> |
| FCFP_12                                       | 1872154524        | <p>AND Enantiomer</p>  <p><chem>[*]C(=S)[*]</chem></p>                  | 0            | 563 out of 690                  |
| FCFP_12                                       | 0                 | <p>AND Enantiomer</p>  <p><chem>[*]C[*]</chem></p>                     | 0            | 1184 out of 1397                |

|         |   |                                                                                                                          |   |                 |
|---------|---|--------------------------------------------------------------------------------------------------------------------------|---|-----------------|
| FCFP_12 | 1 | <p>AND Enantiomer</p> 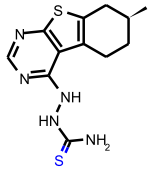 <p>[*]O[*]</p> | 0 | 872 out of 1051 |
|---------|---|--------------------------------------------------------------------------------------------------------------------------|---|-----------------|

9a

TOPKAT\_Ocular\_Irritancy\_None\_vs\_Irritant

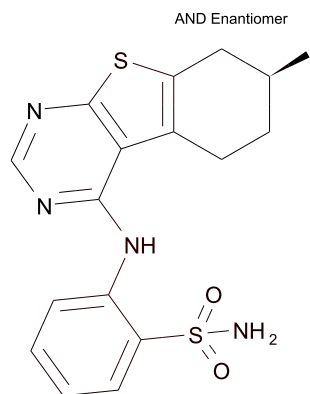
 $C_{17}H_{18}N_4O_2S_2$ 

Molecular Weight: 374.48042

ALogP: 3.541

Rotatable Bonds: 3

Acceptors: 5

Donors: 2

## Structural Similar Compounds

| Name               | ANTHRAQUINONE; 1-AMINO-4-HYDROXY-2-PHENOXY- | Anthraquinone; 1-amino-2-bromo-4-hydroxy-                              | 1-AMINO-4-BENZOYLAMINO-ANTHRAQUINONE |
|--------------------|---------------------------------------------|------------------------------------------------------------------------|--------------------------------------|
| Structure          |                                             |                                                                        |                                      |
| Actual Endpoint    | Irritant                                    | Non-Irritant                                                           | Irritant                             |
| Predicted Endpoint | Irritant                                    | Non-Irritant                                                           | Irritant                             |
| Distance           | 0.612                                       | 0.646                                                                  | 0.649                                |
| Reference          | 28ZPAK 239;72                               | Prehled Prumyslove Toxikologie; Organicke Latky; Marhold; J. pp 535;86 | 28ZPAK-;124;72                       |

## Model Prediction

**Prediction: Irritant**

Probability: 1

Enrichment: 1.18

Bayesian Score: 1.68

Mahalanobis Distance: 7.29

Mahalanobis Distance p-value: 0.993

Prediction: Positive if the Bayesian score is above the estimated best cutoff value from minimizing the false positive and false negative rate.

Probability: The estimated probability that the sample is in the positive category. This assumes that the Bayesian score follows a normal distribution and is different from the prediction using a cutoff.

Enrichment: An estimate of enrichment, that is, the increased likelihood (versus random) of this sample being in the category.

Bayesian Score: The standard Laplacian-modified Bayesian score.

Mahalanobis Distance: The Mahalanobis distance (MD) is the distance to the center of the training data. The larger the MD, the less trustworthy the prediction.

Mahalanobis Distance p-value: The p-value gives the fraction of training data with an MD greater than or equal to the one for the given sample, assuming normally distributed data. The smaller the p-value, the less trustworthy the prediction. For highly non-normal X properties (e.g., fingerprints), the MD p-value is wildly inaccurate.

## Model Applicability

Unknown features are fingerprint features in the query molecule, but not found or appearing too infrequently in the training set.

1. All properties and OPS components are within expected ranges.
2. Unknown FCFP\_2 feature: -1564473960: [\*]:n:[c]1:s:[\*]:[\*]:[c]:1:[\*]
3. Unknown FCFP\_2 feature: -124685461: [\*]:n:c:n:[\*]
4. Unknown FCFP\_2 feature: -1151884458: [\*]N[c](:n:[\*]):[c](:[\*]):[\*]

## Feature Contribution

### Top features for positive contribution

| Fingerprint | Bit/Smiles | Feature Structure | Score | Irritant in training set |
|-------------|------------|-------------------|-------|--------------------------|
|             |            |                   |       |                          |



|                                               |                   |                                                                                                                                                                         |              |                                 |
|-----------------------------------------------|-------------------|-------------------------------------------------------------------------------------------------------------------------------------------------------------------------|--------------|---------------------------------|
| FCFP_12                                       | 1747237384        | <p>AND Enantiomer</p> 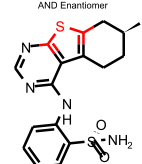 <p><chem>[*][c]1:[*]:[*]:[c](:[*]):s:1</chem></p>             | 0.208        | 44 out of 44                    |
| FCFP_12                                       | -1539132615       | <p>AND Enantiomer</p>  <p><chem>[*]C[c]1:s:[*]:[*]:[c]:1[*]</chem></p>               | 0.197        | 13 out of 13                    |
| FCFP_12                                       | 17                | <p>AND Enantiomer</p>  <p><chem>[*]:s:[*]</chem></p>                                 | 0.189        | 48 out of 49                    |
| <b>Top Features for negative contribution</b> |                   |                                                                                                                                                                         |              |                                 |
| <b>Fingerprint</b>                            | <b>Bit/Smiles</b> | <b>Feature Structure</b>                                                                                                                                                | <b>Score</b> | <b>Irritant in training set</b> |
| FCFP_12                                       | -1698724694       | <p>AND Enantiomer</p>  <p><chem>[*]C[c]1:[cH]:[cH]:[cH]:[cH]:[cH]:[cH]:1</chem></p> | -0.0964      | 107 out of 146                  |
| FCFP_12                                       | 1                 | <p>AND Enantiomer</p>  <p><chem>[*]O[*]</chem></p>                                 | 0            | 872 out of 1051                 |

|         |             |                                                                                                                                 |   |                |
|---------|-------------|---------------------------------------------------------------------------------------------------------------------------------|---|----------------|
| FCFP_12 | -1272798659 | <p>AND Enantiomer</p> 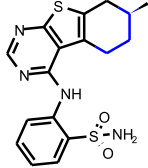 <p>[*]CCC([*])[*]</p> | 0 | 517 out of 643 |
|---------|-------------|---------------------------------------------------------------------------------------------------------------------------------|---|----------------|

9b

TOPKAT\_Ocular\_Irritancy\_None\_vs\_Irritant

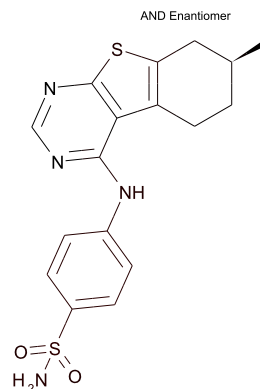
 $C_{17}H_{18}N_4O_2S_2$ 

Molecular Weight: 374.48042

ALogP: 3.541

Rotatable Bonds: 3

Acceptors: 5

Donors: 2

## Model Prediction

**Prediction: Irritant**

Probability: 1

Enrichment: 1.18

Bayesian Score: 1.9

Mahalanobis Distance: 7.29

Mahalanobis Distance p-value: 0.993

Prediction: Positive if the Bayesian score is above the estimated best cutoff value from minimizing the false positive and false negative rate.

Probability: The estimated probability that the sample is in the positive category. This assumes that the Bayesian score follows a normal distribution and is different from the prediction using a cutoff.

Enrichment: An estimate of enrichment, that is, the increased likelihood (versus random) of this sample being in the category.

Bayesian Score: The standard Laplacian-modified Bayesian score.

Mahalanobis Distance: The Mahalanobis distance (MD) is the distance to the center of the training data. The larger the MD, the less trustworthy the prediction.

Mahalanobis Distance p-value: The p-value gives the fraction of training data with an MD greater than or equal to the one for the given sample, assuming normally distributed data. The smaller the p-value, the less trustworthy the prediction. For highly non-normal X properties (e.g., fingerprints), the MD p-value is wildly inaccurate.

## Structural Similar Compounds

| Name               | ANTHRAQUINONE; 1-AMINO-4-HYDROXY-2-PHENOXY- | Anthraquinone; 1-amino-2-bromo-4-hydroxy-                              | 1-AMINO-4-BENZOYLAMINO-ANTHRAQUINONE |
|--------------------|---------------------------------------------|------------------------------------------------------------------------|--------------------------------------|
| Structure          |                                             |                                                                        |                                      |
| Actual Endpoint    | Irritant                                    | Non-Irritant                                                           | Irritant                             |
| Predicted Endpoint | Irritant                                    | Non-Irritant                                                           | Irritant                             |
| Distance           | 0.621                                       | 0.657                                                                  | 0.659                                |
| Reference          | 28ZPAK 239;72                               | Prehled Prumyslove Toxikologie; Organicke Latky; Marhold; J. pp 535;86 | 28ZPAK-;124;72                       |

## Model Applicability

Unknown features are fingerprint features in the query molecule, but not found or appearing too infrequently in the training set.

1. All properties and OPS components are within expected ranges.
2. Unknown FCFP\_2 feature: -1564473960: [\*]:n:[c]1:s:[\*]:[\*]:[c]:1:[\*]
3. Unknown FCFP\_2 feature: -124685461: [\*]:n:c:n:[\*]
4. Unknown FCFP\_2 feature: -1151884458: [\*]N[c](n:[\*]):[c](:[\*]):[\*]

## Feature Contribution

### Top features for positive contribution

| Fingerprint | Bit/Smiles | Feature Structure | Score | Irritant in training set |
|-------------|------------|-------------------|-------|--------------------------|
|             |            |                   |       |                          |

|                                               |                   |                                                                                                                                                               |              |                                 |
|-----------------------------------------------|-------------------|---------------------------------------------------------------------------------------------------------------------------------------------------------------|--------------|---------------------------------|
| FCFP_12                                       | 1747237384        | <p>AND Enantiomer</p> 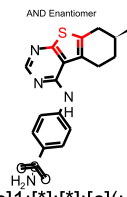 <p>[*][c]1:[*]:[*]:[c](:<br/>[*]):s:1</p>            | 0.208        | 44 out of 44                    |
| FCFP_12                                       | -1539132615       | <p>AND Enantiomer</p>  <p>[*]C[c]1:s:[*]:[*]:[c<br/>]:1[*]</p>             | 0.197        | 13 out of 13                    |
| FCFP_12                                       | 17                | <p>AND Enantiomer</p>  <p>[*]:s:[*]</p>                                    | 0.189        | 48 out of 49                    |
| <b>Top Features for negative contribution</b> |                   |                                                                                                                                                               |              |                                 |
| <b>Fingerprint</b>                            | <b>Bit/Smiles</b> | <b>Feature Structure</b>                                                                                                                                      | <b>Score</b> | <b>Irritant in training set</b> |
| FCFP_12                                       | -453677277        | <p>AND Enantiomer</p>  <p>[*]C[c]1:[cH]:[*]:[cH<br/>]:[cH]:[cH]:1</p>     | 0            | 264 out of 323                  |
| FCFP_12                                       | -773983804        | <p>AND Enantiomer</p>  <p>[*]N[c]1:[cH]:[*]:[c<br/>([*]):[cH]:[cH]:1</p> | 0            | 102 out of 121                  |

|         |   |                                                                                                                                                                                                                                                                                                                                                                                                                                                                                                                                                                            |   |                  |
|---------|---|----------------------------------------------------------------------------------------------------------------------------------------------------------------------------------------------------------------------------------------------------------------------------------------------------------------------------------------------------------------------------------------------------------------------------------------------------------------------------------------------------------------------------------------------------------------------------|---|------------------|
| FCFP_12 | 0 | <p>AND Enantiomer</p> 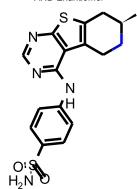 <p>The image shows a chemical structure consisting of a thiazole ring. One carbon of the thiazole ring is substituted with a piperidine ring. Another carbon of the thiazole ring is substituted with a benzamide group, which consists of a benzene ring attached to a carbonyl group (C=O) and an amino group (NH<sub>2</sub>). The text "AND Enantiomer" is positioned above the thiazole ring. Below the benzamide group, the text "[*]C[*]" is present.</p> | 0 | 1184 out of 1397 |
|---------|---|----------------------------------------------------------------------------------------------------------------------------------------------------------------------------------------------------------------------------------------------------------------------------------------------------------------------------------------------------------------------------------------------------------------------------------------------------------------------------------------------------------------------------------------------------------------------------|---|------------------|

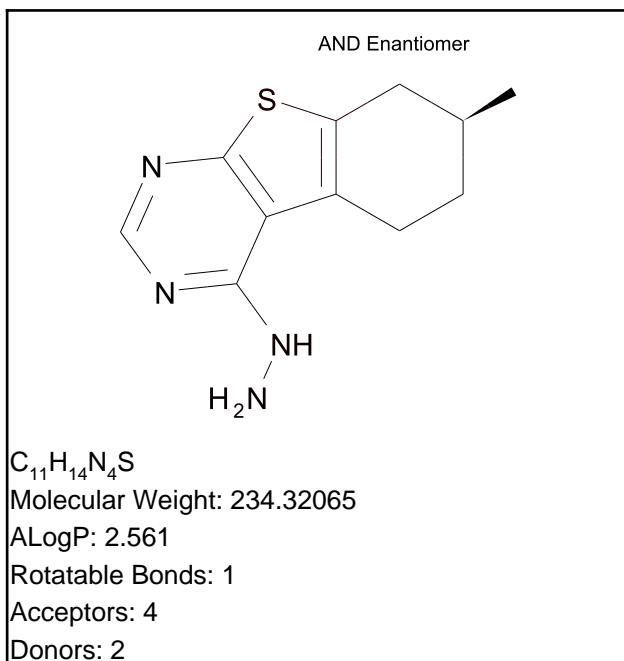

### Model Prediction

**Prediction: Irritant**

Probability: 1

Enrichment: 1.18

Bayesian Score: 1

Mahalanobis Distance: 7.79

Mahalanobis Distance p-value: 0.96

Prediction: Positive if the Bayesian score is above the estimated best cutoff value from minimizing the false positive and false negative rate.

Probability: The estimated probability that the sample is in the positive category. This assumes that the Bayesian score follows a normal distribution and is different from the prediction using a cutoff.

Enrichment: An estimate of enrichment, that is, the increased likelihood (versus random) of this sample being in the category.

Bayesian Score: The standard Laplacian-modified Bayesian score.

Mahalanobis Distance: The Mahalanobis distance (MD) is the distance to the center of the training data. The larger the MD, the less trustworthy the prediction.

Mahalanobis Distance p-value: The p-value gives the fraction of training data with an MD greater than or equal to the one for the given sample, assuming normally distributed data. The smaller the p-value, the less trustworthy the prediction. For highly non-normal X properties (e.g., fingerprints), the MD p-value is wildly inaccurate.

### Structural Similar Compounds

| Name               | PHENOL; 4;4'-SULFONYLDI-                                                            | NAPHTHENESULFONIC ACID;2-HYDROXY-                                                   | FURIL;DIOXIME                                                                       |
|--------------------|-------------------------------------------------------------------------------------|-------------------------------------------------------------------------------------|-------------------------------------------------------------------------------------|
| Structure          | 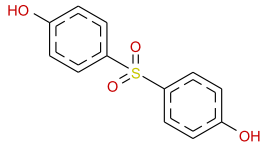 |  |  |
| Actual Endpoint    | Irritant                                                                            | Irritant                                                                            | Irritant                                                                            |
| Predicted Endpoint | Irritant                                                                            | Irritant                                                                            | Irritant                                                                            |
| Distance           | 0.540                                                                               | 0.542                                                                               | 0.547                                                                               |
| Reference          | BIOFX* 601-05501;74                                                                 | 28ZPAK-;186;72                                                                      | 28ZPAK                                                                              |

### Model Applicability

Unknown features are fingerprint features in the query molecule, but not found or appearing too infrequently in the training set.

1. All properties and OPS components are within expected ranges.
2. Unknown FCFP\_2 feature: -1564473960: [\*]:n:[c]1:s:[\*]:[\*]:[c]:1:[\*]
3. Unknown FCFP\_2 feature: -124685461: [\*]:n:c:n:[\*]
4. Unknown FCFP\_2 feature: -1151884458: [\*]N[c](:n:[\*]):[c](:[\*]):[\*]

### Feature Contribution

#### Top features for positive contribution

| Fingerprint | Bit/Smiles | Feature Structure                                                                                                                                                                                                         | Score | Irritant in training set |
|-------------|------------|---------------------------------------------------------------------------------------------------------------------------------------------------------------------------------------------------------------------------|-------|--------------------------|
| FCFP_12     | 1747237384 | <p style="text-align: center;">AND Enantiomer</p> 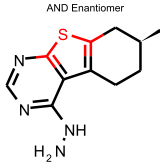 <p style="text-align: center;"><chem>[*][c]1:[*]:[*]:[c](:[*]):[*]:s:1</chem></p> | 0.208 | 44 out of 44             |

|                                               |                   |                                                                                                                                                               |              |                                 |
|-----------------------------------------------|-------------------|---------------------------------------------------------------------------------------------------------------------------------------------------------------|--------------|---------------------------------|
| FCFP_12                                       | 1539132615        | <p>AND Enantiomer</p> 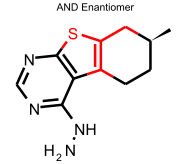 <p>[*]C[c]1:s:[*]:[*]:[c]:1[*]</p>                  | 0.197        | 13 out of 13                    |
| FCFP_12                                       | 17                | <p>AND Enantiomer</p>  <p>[*]:s:[*]</p>                                    | 0.189        | 48 out of 49                    |
| <b>Top Features for negative contribution</b> |                   |                                                                                                                                                               |              |                                 |
| <b>Fingerprint</b>                            | <b>Bit/Smiles</b> | <b>Feature Structure</b>                                                                                                                                      | <b>Score</b> | <b>Irritant in training set</b> |
| FCFP_12                                       | 307419094         | <p>AND Enantiomer</p>  <p>[*][c](:[*]):[c]1:[c]([*]):[*]:[*]:[c]:1:[*]</p> | 0            | 43 out of 52                    |
| FCFP_12                                       | 203677720         | <p>AND Enantiomer</p>  <p>[*]C[c]1:[c]([*]):[*]:[*]:[c]:1:[*]</p>         | 0            | 319 out of 382                  |
| FCFP_12                                       | 136597326         | <p>AND Enantiomer</p>  <p>[*]C([*])C</p>                                 | 0            | 612 out of 753                  |

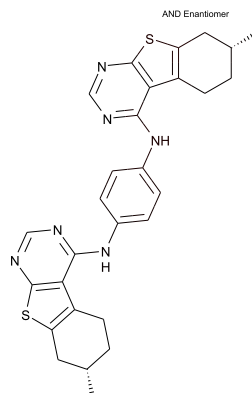
 $C_{28}H_{28}N_6S_2$ 

Molecular Weight: 512.69212

ALogP: 7.842

Rotatable Bonds: 4

Acceptors: 6

Donors: 2

## Model Prediction

**Prediction: Irritant**

Probability: 1

Enrichment: 1.18

Bayesian Score: 0.917

Mahalanobis Distance: 9.37

Mahalanobis Distance p-value: 0.315

Prediction: Positive if the Bayesian score is above the estimated best cutoff value from minimizing the false positive and false negative rate.

Probability: The estimated probability that the sample is in the positive category. This assumes that the Bayesian score follows a normal distribution and is different from the prediction using a cutoff.

Enrichment: An estimate of enrichment, that is, the increased likelihood (versus random) of this sample being in the category.

Bayesian Score: The standard Laplacian-modified Bayesian score.

Mahalanobis Distance: The Mahalanobis distance (MD) is the distance to the center of the training data. The larger the MD, the less trustworthy the prediction.

Mahalanobis Distance p-value: The p-value gives the fraction of training data with an MD greater than or equal to the one for the given sample, assuming normally distributed data. The smaller the p-value, the less trustworthy the prediction. For highly non-normal X properties (e.g., fingerprints), the MD p-value is wildly inaccurate.

## Structural Similar Compounds

| Name               | ANILINE;N;N'-1;4-ANTHRAQUINONYLENEBIS(4-PHENOXY- | BENZANILIDE;2';2'''-DITHIOBIS- | DINAPHTHO(1;2;3-CD;3';2';1'-IM)PERYLENE-5;10-DIONE;16;17-DIHYDROXY |
|--------------------|--------------------------------------------------|--------------------------------|--------------------------------------------------------------------|
| Structure          |                                                  |                                |                                                                    |
| Actual Endpoint    | Non-Irritant                                     | Non-Irritant                   | Irritant                                                           |
| Predicted Endpoint | Non-Irritant                                     | Non-Irritant                   | Irritant                                                           |
| Distance           | 0.719                                            | 0.737                          | 0.753                                                              |
| Reference          | 28ZPAK-;114;72                                   | 28ZPAK-;173;72                 | 28ZPAK-;104;72                                                     |

## Model Applicability

Unknown features are fingerprint features in the query molecule, but not found or appearing too infrequently in the training set.

- All properties and OPS components are within expected ranges.
- Unknown FCFP\_2 feature: -1564473960: [\*]:n:[c]1:s:[\*]:[\*]:[c]:1:[\*]
- Unknown FCFP\_2 feature: -124685461: [\*]:n:c:n:[\*]
- Unknown FCFP\_2 feature: -1151884458: [\*]N[c](:n:[\*]):[c](:[\*]):[\*]

## Feature Contribution

| Top features for positive contribution |            |                                   |       |                          |
|----------------------------------------|------------|-----------------------------------|-------|--------------------------|
| Fingerprint                            | Bit/Smiles | Feature Structure                 | Score | Irritant in training set |
| FCFP_12                                | 1747237384 | <br>[*][c]1:[*]:[*]:[c](:[*]):s:1 | 0.208 | 44 out of 44             |



|                                               |                   |                                                                                                                                              |              |                                 |
|-----------------------------------------------|-------------------|----------------------------------------------------------------------------------------------------------------------------------------------|--------------|---------------------------------|
| FCFP_12                                       | -1539132615       | <p>AND Enantiomer</p> 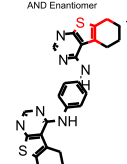 <p>[*]C[c]1:s:[*]:[*]:[c]:1[*]</p> | 0.197        | 13 out of 13                    |
| FCFP_12                                       | 17                | <p>AND Enantiomer</p>  <p>[*]:s:[*]</p>                   | 0.189        | 48 out of 49                    |
| <b>Top Features for negative contribution</b> |                   |                                                                                                                                              |              |                                 |
| <b>Fingerprint</b>                            | <b>Bit/Smiles</b> | <b>Feature Structure</b>                                                                                                                     | <b>Score</b> | <b>Irritant in training set</b> |
| FCFP_12                                       | 0                 | <p>AND Enantiomer</p>  <p>[*]C[*]</p>                     | 0            | 1184 out of 1397                |
| FCFP_12                                       | -1272798659       | <p>AND Enantiomer</p>  <p>[*]CCC([*])[*]</p>             | 0            | 517 out of 643                  |
| FCFP_12                                       | -1043339860       | <p>AND Enantiomer</p>  <p>[*]CC(C)C[*]</p>              | 0            | 146 out of 186                  |

# Erlotinib

# TOPKAT\_Ocular\_Irritancy\_None\_vs\_Irritant

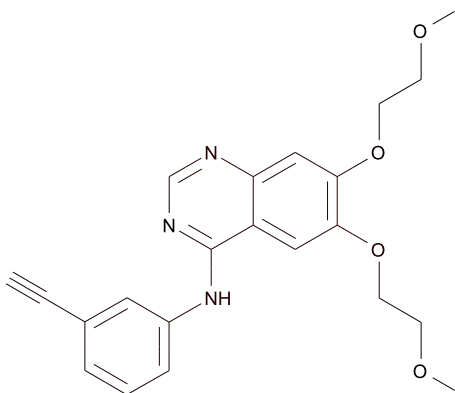

$C_{22}H_{23}N_3O_4$   
 Molecular Weight: 393.43572  
 ALogP: 4.309  
 Rotatable Bonds: 10  
 Acceptors: 7  
 Donors: 1

## Structural Similar Compounds

| Name               | Benzoic acid; p-(N-butyl-2-(butylamino)acetamido)-; butyl ester; | COLCHICINE       | Cinchoninamide; 2-butoxy-N-(2-(diethylamino)ethyl)-; monohydrochloride |
|--------------------|------------------------------------------------------------------|------------------|------------------------------------------------------------------------|
| Structure          |                                                                  |                  |                                                                        |
| Actual Endpoint    | Irritant                                                         | Irritant         | Irritant                                                               |
| Predicted Endpoint | Non-Irritant                                                     | Irritant         | Irritant                                                               |
| Distance           | 0.637                                                            | 0.682            | 0.747                                                                  |
| Reference          | Arzneimittel-Forschung 8;609;58                                  | AJOPAA 31;837;48 | Arzneimittel-Forschung 8;181;58                                        |

## Model Prediction

**Prediction: Irritant**

Probability: 1

Enrichment: 1.18

Bayesian Score: 2.13

Mahalanobis Distance: 9.75

Mahalanobis Distance p-value: 0.161

Prediction: Positive if the Bayesian score is above the estimated best cutoff value from minimizing the false positive and false negative rate.

Probability: The estimated probability that the sample is in the positive category. This assumes that the Bayesian score follows a normal distribution and is different from the prediction using a cutoff.

Enrichment: An estimate of enrichment, that is, the increased likelihood (versus random) of this sample being in the category.

Bayesian Score: The standard Laplacian-modified Bayesian score.

Mahalanobis Distance: The Mahalanobis distance (MD) is the distance to the center of the training data. The larger the MD, the less trustworthy the prediction.

Mahalanobis Distance p-value: The p-value gives the fraction of training data with an MD greater than or equal to the one for the given sample, assuming normally distributed data. The smaller the p-value, the less trustworthy the prediction. For highly non-normal X properties (e.g., fingerprints), the MD p-value is wildly inaccurate.

## Model Applicability

Unknown features are fingerprint features in the query molecule, but not found or appearing too infrequently in the training set.

1. All properties and OPS components are within expected ranges.
2. Unknown FCFP\_2 feature: -124685461: [\*]:n:c:n:[\*]
3. Unknown FCFP\_2 feature: -1151884458: [\*]N[c](:n:[\*]):[c](:[\*]):[\*]
4. Unknown FCFP\_2 feature: 902193919: [\*]:[c](:[\*])C#C

## Feature Contribution

### Top features for positive contribution

| Fingerprint | Bit/Smiles | Feature Structure                              | Score | Irritant in training set |
|-------------|------------|------------------------------------------------|-------|--------------------------|
| FCFP_12     | 1747237384 | <br><chem>[*][c]1:[*]:[*]:[c](:[*]):s:1</chem> | 0.208 | 44 out of 44             |

|                                               |                   |                                                                                                                                                        |              |                                 |
|-----------------------------------------------|-------------------|--------------------------------------------------------------------------------------------------------------------------------------------------------|--------------|---------------------------------|
| FCFP_12                                       | 178336375         | 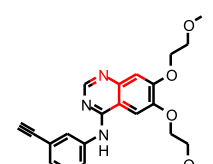<br><chem>[*]:[cH]:[c](:n:[*]):</chem><br><chem>[c](:[*]):[*]</chem> | 0.202        | 19 out of 19                    |
| FCFP_12                                       | 17                | <br><chem>[*]:s:[*]</chem>                                          | 0.189        | 48 out of 49                    |
| <b>Top Features for negative contribution</b> |                   |                                                                                                                                                        |              |                                 |
| <b>Fingerprint</b>                            | <b>Bit/Smiles</b> | <b>Feature Structure</b>                                                                                                                               | <b>Score</b> | <b>Irritant in training set</b> |
| FCFP_12                                       | 341504799         | <br><chem>[*]CCOC</chem>                                            | 0            | 17 out of 22                    |
| FCFP_12                                       | -1272768868       | <br><chem>[*]CCO[*]</chem>                                         | 0            | 396 out of 514                  |
| FCFP_12                                       | 1                 | <br><chem>[*]O[*]</chem>                                          | 0            | 872 out of 1051                 |

5a

## TOPKAT\_Rat\_Female\_FDA\_None\_vs\_Carcinogen

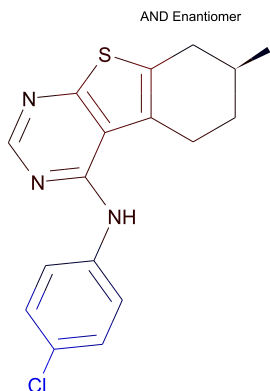C<sub>17</sub>H<sub>16</sub>ClN<sub>3</sub>S

Molecular Weight: 329.84704

ALogP: 5.5

Rotatable Bonds: 2

Acceptors: 3

Donors: 1

**Model Prediction****Prediction: Carcinogen**

Probability: 0.288

Enrichment: 0.893

Bayesian Score: -0.553

Mahalanobis Distance: 11.8

Mahalanobis Distance p-value: 0.00845

Prediction: Positive if the Bayesian score is above the estimated best cutoff value from minimizing the false positive and false negative rate.

Probability: The estimated probability that the sample is in the positive category. This assumes that the Bayesian score follows a normal distribution and is different from the prediction using a cutoff.

Enrichment: An estimate of enrichment, that is, the increased likelihood (versus random) of this sample being in the category.

Bayesian Score: The standard Laplacian-modified Bayesian score.

Mahalanobis Distance: The Mahalanobis distance (MD) is the distance to the center of the training data. The larger the MD, the less trustworthy the prediction.

Mahalanobis Distance p-value: The p-value gives the fraction of training data with an MD greater than or equal to the one for the given sample, assuming normally distributed data. The smaller the p-value, the less trustworthy the prediction. For highly non-normal X properties (e.g., fingerprints), the MD p-value is wildly inaccurate.

**Structural Similar Compounds**

| Name               | Nafenopin                                                           | Meclofenamate                                                       | Levonorgestrel                                                      |
|--------------------|---------------------------------------------------------------------|---------------------------------------------------------------------|---------------------------------------------------------------------|
| Structure          |                                                                     |                                                                     |                                                                     |
| Actual Endpoint    | Non-Carcinogen                                                      | Non-Carcinogen                                                      | Non-Carcinogen                                                      |
| Predicted Endpoint | Non-Carcinogen                                                      | Non-Carcinogen                                                      | Carcinogen                                                          |
| Distance           | 0.638                                                               | 0.651                                                               | 0.656                                                               |
| Reference          | US FDA (Centre for Drug Eval.& Res./Off. Testing & Res.) Sept. 1997 | US FDA (Centre for Drug Eval.& Res./Off. Testing & Res.) Sept. 1997 | US FDA (Centre for Drug Eval.& Res./Off. Testing & Res.) Sept. 1997 |

**Model Applicability**

Unknown features are fingerprint features in the query molecule, but not found or appearing too infrequently in the training set.

1. All properties and OPS components are within expected ranges.
2. Unknown ECFP<sub>2</sub> feature: -1597579789: [\*]:n:[c]1:s:[\*]:[\*]:[c]:1:[\*]

**Feature Contribution****Top features for positive contribution**

| Fingerprint        | Bit/Smiles | Feature Structure                     | Score | Carcinogen in training set |
|--------------------|------------|---------------------------------------|-------|----------------------------|
| ECFP <sub>12</sub> | 85262808   | <br>[*][c]1:[*]:[*]:[c](:<br>[*]):s:1 | 0.851 | 5 out of 5                 |

|                                               |                   |                                                                                                                                                                   |              |                                   |
|-----------------------------------------------|-------------------|-------------------------------------------------------------------------------------------------------------------------------------------------------------------|--------------|-----------------------------------|
| ECFP_12                                       | 553181281         | <p>AND Enantiomer</p> 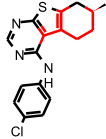<br><chem>[*]C@@H1[*](c2[*]:[*]:c(c[*]):c:2 CC1</chem>   | 0.613        | 2 out of 2                        |
| ECFP_12                                       | -177077903        | <p>AND Enantiomer</p> <br><chem>[*]N[c](:[cH]:[*]):[c H]:[*]</chem>            | 0.529        | 6 out of 10                       |
| <b>Top Features for negative contribution</b> |                   |                                                                                                                                                                   |              |                                   |
| <b>Fingerprint</b>                            | <b>Bit/Smiles</b> | <b>Feature Structure</b>                                                                                                                                          | <b>Score</b> | <b>Carcinogen in training set</b> |
| ECFP_12                                       | 99947387          | <p>AND Enantiomer</p> <br><chem>[*]:[c](:[*])Cl</chem>                         | -0.817       | 8 out of 62                       |
| ECFP_12                                       | 1854732111        | <p>AND Enantiomer</p> <br><chem>[*][c]1:[*]:[cH]:[c](Cl):[cH]:[cH]:1</chem>   | -0.816       | 4 out of 33                       |
| ECFP_12                                       | -769655848        | <p>AND Enantiomer</p> <br><chem>[*][c]1:[cH]:[cH]:[c](Cl):[cH]:[cH]:1</chem> | -0.797       | 1 out of 11                       |

5b

TOPKAT\_Rat\_Female\_FDA\_None\_vs\_Carcinogen

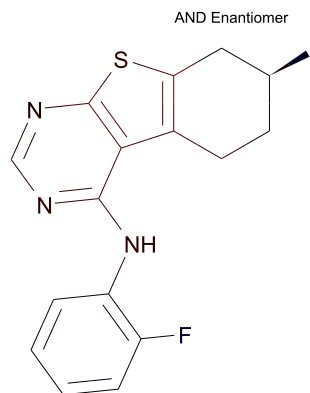C<sub>17</sub>H<sub>16</sub>FN<sub>3</sub>S

Molecular Weight: 313.39244

ALogP: 5.041

Rotatable Bonds: 2

Acceptors: 3

Donors: 1

**Model Prediction****Prediction: Carcinogen**

Probability: 0.371

Enrichment: 1.15

Bayesian Score: 3.05

Mahalanobis Distance: 10.5

Mahalanobis Distance p-value: 0.169

Prediction: Positive if the Bayesian score is above the estimated best cutoff value from minimizing the false positive and false negative rate.

Probability: The estimated probability that the sample is in the positive category. This assumes that the Bayesian score follows a normal distribution and is different from the prediction using a cutoff.

Enrichment: An estimate of enrichment, that is, the increased likelihood (versus random) of this sample being in the category.

Bayesian Score: The standard Laplacian-modified Bayesian score.

Mahalanobis Distance: The Mahalanobis distance (MD) is the distance to the center of the training data. The larger the MD, the less trustworthy the prediction.

Mahalanobis Distance p-value: The p-value gives the fraction of training data with an MD greater than or equal to the one for the given sample, assuming normally distributed data. The smaller the p-value, the less trustworthy the prediction. For highly non-normal X properties (e.g., fingerprints), the MD p-value is wildly inaccurate.

**Structural Similar Compounds**

| Name               | Nafenopin                                                           | Meclofenamate                                                       | Levonorgestrel                                                      |
|--------------------|---------------------------------------------------------------------|---------------------------------------------------------------------|---------------------------------------------------------------------|
| Structure          |                                                                     |                                                                     |                                                                     |
| Actual Endpoint    | Non-Carcinogen                                                      | Non-Carcinogen                                                      | Non-Carcinogen                                                      |
| Predicted Endpoint | Non-Carcinogen                                                      | Non-Carcinogen                                                      | Carcinogen                                                          |
| Distance           | 0.622                                                               | 0.622                                                               | 0.648                                                               |
| Reference          | US FDA (Centre for Drug Eval.& Res./Off. Testing & Res.) Sept. 1997 | US FDA (Centre for Drug Eval.& Res./Off. Testing & Res.) Sept. 1997 | US FDA (Centre for Drug Eval.& Res./Off. Testing & Res.) Sept. 1997 |

**Model Applicability**

Unknown features are fingerprint features in the query molecule, but not found or appearing too infrequently in the training set.

1. All properties and OPS components are within expected ranges.
2. Unknown ECFP<sub>2</sub> feature: -1597579789: [\*]:n:[c]1:s:[\*]:[\*]:[c]:1:[\*]

**Feature Contribution****Top features for positive contribution**

| Fingerprint        | Bit/Smiles | Feature Structure                                               | Score | Carcinogen in training set |
|--------------------|------------|-----------------------------------------------------------------|-------|----------------------------|
| ECFP <sub>12</sub> | 85262808   | <p>AND Enantiomer</p> <p>[*][c]1:[*]:[*]:[c](:<br/>[*]):s:1</p> | 0.851 | 5 out of 5                 |

|                                               |                   |                                                                                                                                                                |              |                                   |
|-----------------------------------------------|-------------------|----------------------------------------------------------------------------------------------------------------------------------------------------------------|--------------|-----------------------------------|
| ECFP_12                                       | 553181281         | <p>AND Enantiomer</p>  <p><chem>*[C@@H]1[*]c2[*]:[*]c[*]c2[*]CC1</chem></p> | 0.613        | 2 out of 2                        |
| ECFP_12                                       | 914325265         | <p>AND Enantiomer</p>  <p><chem>*[*]:s[*]</chem></p>                        | 0.516        | 8 out of 14                       |
| <b>Top Features for negative contribution</b> |                   |                                                                                                                                                                |              |                                   |
| <b>Fingerprint</b>                            | <b>Bit/Smiles</b> | <b>Feature Structure</b>                                                                                                                                       | <b>Score</b> | <b>Carcinogen in training set</b> |
| ECFP_12                                       | 292958156         | <p>AND Enantiomer</p>  <p><chem>*[*]CC(C)C[*]</chem></p>                    | -0.485       | 0 out of 2                        |
| ECFP_12                                       | 220735655         | <p>AND Enantiomer</p>  <p><chem>*[*]:[c]([*])F</chem></p>                 | -0.327       | 4 out of 19                       |
| ECFP_12                                       | -1311285389       | <p>AND Enantiomer</p>  <p><chem>*[*][c]([*]):[c](F):[cH]([*])</chem></p>  | -0.318       | 2 out of 10                       |

5c

TOPKAT\_Rat\_Female\_FDA\_None\_vs\_Carcinogen

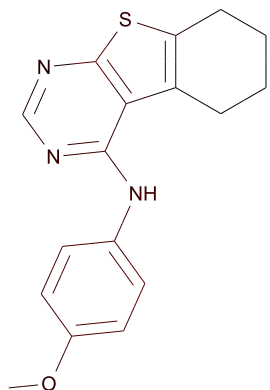C<sub>17</sub>H<sub>17</sub>N<sub>3</sub>OS

Molecular Weight: 311.40138

ALogP: 4.568

Rotatable Bonds: 3

Acceptors: 4

Donors: 1

### Model Prediction

Prediction: Carcinogen

Probability: 0.432

Enrichment: 1.34

Bayesian Score: 5.15

Mahalanobis Distance: 12.4

Mahalanobis Distance p-value: 0.00124

Prediction: Positive if the Bayesian score is above the estimated best cutoff value from minimizing the false positive and false negative rate.

Probability: The estimated probability that the sample is in the positive category. This assumes that the Bayesian score follows a normal distribution and is different from the prediction using a cutoff.

Enrichment: An estimate of enrichment, that is, the increased likelihood (versus random) of this sample being in the category.

Bayesian Score: The standard Laplacian-modified Bayesian score.

Mahalanobis Distance: The Mahalanobis distance (MD) is the distance to the center of the training data. The larger the MD, the less trustworthy the prediction.

Mahalanobis Distance p-value: The p-value gives the fraction of training data with an MD greater than or equal to the one for the given sample, assuming normally distributed data. The smaller the p-value, the less trustworthy the prediction. For highly non-normal X properties (e.g., fingerprints), the MD p-value is wildly inaccurate.

### Structural Similar Compounds

| Name               | Indomethacin                                                        | Estrogens; conjug.                                                  | Nafenopin                                                           |
|--------------------|---------------------------------------------------------------------|---------------------------------------------------------------------|---------------------------------------------------------------------|
| Structure          |                                                                     |                                                                     |                                                                     |
| Actual Endpoint    | Non-Carcinogen                                                      | Carcinogen                                                          | Non-Carcinogen                                                      |
| Predicted Endpoint | Non-Carcinogen                                                      | Carcinogen                                                          | Non-Carcinogen                                                      |
| Distance           | 0.592                                                               | 0.637                                                               | 0.638                                                               |
| Reference          | US FDA (Centre for Drug Eval.& Res./Off. Testing & Res.) Sept. 1997 | US FDA (Centre for Drug Eval.& Res./Off. Testing & Res.) Sept. 1997 | US FDA (Centre for Drug Eval.& Res./Off. Testing & Res.) Sept. 1997 |

### Model Applicability

Unknown features are fingerprint features in the query molecule, but not found or appearing too infrequently in the training set.

1. All properties and OPS components are within expected ranges.
2. Unknown ECFP<sub>2</sub> feature: -1597579789: [\*]:n:[c]1:s:[\*]:[\*]:[c]:1:[\*]

### Feature Contribution

#### Top features for positive contribution

| Fingerprint        | Bit/Smiles | Feature Structure                | Score | Carcinogen in training set |
|--------------------|------------|----------------------------------|-------|----------------------------|
| ECFP <sub>12</sub> | 85262808   | <br>[*][c]1:[*]:[*]:[c]([*]):s:1 | 0.851 | 5 out of 5                 |



|                                               |                   |                                                                                                                                        |              |                                   |
|-----------------------------------------------|-------------------|----------------------------------------------------------------------------------------------------------------------------------------|--------------|-----------------------------------|
| ECFP_12                                       | -177077903        | 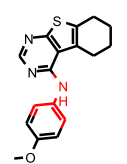<br><chem>[*]N[c](:[cH]:[*]):[cH]:[*]</chem>        | 0.529        | 6 out of 10                       |
| ECFP_12                                       | 914325265         | <br><chem>[*]:s:[*]</chem>                          | 0.516        | 8 out of 14                       |
| <b>Top Features for negative contribution</b> |                   |                                                                                                                                        |              |                                   |
| <b>Fingerprint</b>                            | <b>Bit/Smiles</b> | <b>Feature Structure</b>                                                                                                               | <b>Score</b> | <b>Carcinogen in training set</b> |
| ECFP_12                                       | 552088469         | <br><chem>[*]:[c]1:[*]:[*]:[c]2[*]CCC[c]:1:2</chem> | -0.272       | 0 out of 1                        |
| ECFP_12                                       | -1672647522       | <br><chem>[*]C[c]1:s:[*]:[*]:[c]:1[*]</chem>       | -0.272       | 0 out of 1                        |
| ECFP_12                                       | 864909220         | <br><chem>[*]OC</chem>                            | -0.147       | 12 out of 45                      |

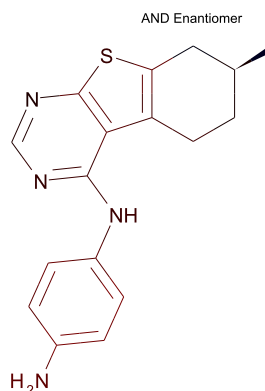

$C_{17}H_{18}N_4S$

Molecular Weight: 310.41662

ALogP: 4.089

Rotatable Bonds: 2

Acceptors: 4

Donors: 2

## Model Prediction

**Prediction: Carcinogen**

Probability: 0.474

Enrichment: 1.47

Bayesian Score: 6.43

Mahalanobis Distance: 12.1

Mahalanobis Distance p-value: 0.00357

Prediction: Positive if the Bayesian score is above the estimated best cutoff value from minimizing the false positive and false negative rate.

Probability: The estimated probability that the sample is in the positive category. This assumes that the Bayesian score follows a normal distribution and is different from the prediction using a cutoff.

Enrichment: An estimate of enrichment, that is, the increased likelihood (versus random) of this sample being in the category.

Bayesian Score: The standard Laplacian-modified Bayesian score.

Mahalanobis Distance: The Mahalanobis distance (MD) is the distance to the center of the training data. The larger the MD, the less trustworthy the prediction.

Mahalanobis Distance p-value: The p-value gives the fraction of training data with an MD greater than or equal to the one for the given sample, assuming normally distributed data. The smaller the p-value, the less trustworthy the prediction. For highly non-normal X properties (e.g., fingerprints), the MD p-value is wildly inaccurate.

## Structural Similar Compounds

| Name               | Niclosamide                                                         | Phenolphthalein                                                     | Pyrimethamine                                                       |
|--------------------|---------------------------------------------------------------------|---------------------------------------------------------------------|---------------------------------------------------------------------|
| Structure          |                                                                     |                                                                     |                                                                     |
| Actual Endpoint    | Non-Carcinogen                                                      | Carcinogen                                                          | Non-Carcinogen                                                      |
| Predicted Endpoint | Non-Carcinogen                                                      | Carcinogen                                                          | Non-Carcinogen                                                      |
| Distance           | 0.573                                                               | 0.584                                                               | 0.638                                                               |
| Reference          | US FDA (Centre for Drug Eval.& Res./Off. Testing & Res.) Sept. 1997 | US FDA (Centre for Drug Eval.& Res./Off. Testing & Res.) Sept. 1997 | US FDA (Centre for Drug Eval.& Res./Off. Testing & Res.) Sept. 1997 |

## Model Applicability

Unknown features are fingerprint features in the query molecule, but not found or appearing too infrequently in the training set.

1. All properties and OPS components are within expected ranges.
2. Unknown ECFP\_2 feature: -1597579789: [\*]:n:[c]1:s:[\*]:[\*]:[c]:1:[\*]

## Feature Contribution

### Top features for positive contribution

| Fingerprint | Bit/Smiles | Feature Structure                              | Score | Carcinogen in training set |
|-------------|------------|------------------------------------------------|-------|----------------------------|
| ECFP_12     | 85262808   | <br><chem>[*][c]1:[*]:[*]:[c](:[*]):s:1</chem> | 0.851 | 5 out of 5                 |

|                                               |                   |                                                                                                                                                                       |              |                                   |
|-----------------------------------------------|-------------------|-----------------------------------------------------------------------------------------------------------------------------------------------------------------------|--------------|-----------------------------------|
| ECFP_12                                       | 553181281         | <p>AND Enantiomer</p> 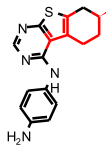 <p><chem>[*]C@@H1[*](c2[*]:[*]c(c[*])c2[*]:2 CC1</chem></p> | 0.613        | 2 out of 2                        |
| ECFP_12                                       | 773910207         | <p>AND Enantiomer</p>  <p><chem>N[c]1:[cH]:[cH]:[*]:[cH]:[cH]:1</chem></p>         | 0.553        | 4 out of 6                        |
| <b>Top Features for negative contribution</b> |                   |                                                                                                                                                                       |              |                                   |
| <b>Fingerprint</b>                            | <b>Bit/Smiles</b> | <b>Feature Structure</b>                                                                                                                                              | <b>Score</b> | <b>Carcinogen in training set</b> |
| ECFP_12                                       | 292958156         | <p>AND Enantiomer</p>  <p><chem>[*]CC(C)C[*]</chem></p>                            | -0.485       | 0 out of 2                        |
| ECFP_12                                       | -1672647522       | <p>AND Enantiomer</p>  <p><chem>[*]C[c]1:s:[*]:[*]:[c]:1[*]</chem></p>            | -0.272       | 0 out of 1                        |
| ECFP_12                                       | 865482986         | <p>AND Enantiomer</p>  <p><chem>[*]C[*]C</chem></p>                              | -0.233       | 4 out of 17                       |

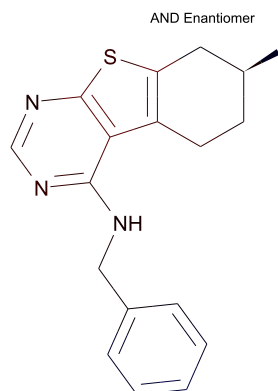

$C_{18}H_{19}N_3S$

Molecular Weight: 309.42856

ALogP: 4.678

Rotatable Bonds: 3

Acceptors: 3

Donors: 1

## Model Prediction

**Prediction: Carcinogen**

Probability: 0.362

Enrichment: 1.13

Bayesian Score: 2.75

Mahalanobis Distance: 13.1

Mahalanobis Distance p-value: 9.36e-005

Prediction: Positive if the Bayesian score is above the estimated best cutoff value from minimizing the false positive and false negative rate.

Probability: The estimated probability that the sample is in the positive category. This assumes that the Bayesian score follows a normal distribution and is different from the prediction using a cutoff.

Enrichment: An estimate of enrichment, that is, the increased likelihood (versus random) of this sample being in the category.

Bayesian Score: The standard Laplacian-modified Bayesian score.

Mahalanobis Distance: The Mahalanobis distance (MD) is the distance to the center of the training data. The larger the MD, the less trustworthy the prediction.

Mahalanobis Distance p-value: The p-value gives the fraction of training data with an MD greater than or equal to the one for the given sample, assuming normally distributed data. The smaller the p-value, the less trustworthy the prediction. For highly non-normal X properties (e.g., fingerprints), the MD p-value is wildly inaccurate.

## Structural Similar Compounds

| Name               | Nafenopin                                                           | Meclofenamate                                                       | Pergolide                                                           |
|--------------------|---------------------------------------------------------------------|---------------------------------------------------------------------|---------------------------------------------------------------------|
| Structure          |                                                                     |                                                                     |                                                                     |
| Actual Endpoint    | Non-Carcinogen                                                      | Non-Carcinogen                                                      | Carcinogen                                                          |
| Predicted Endpoint | Non-Carcinogen                                                      | Non-Carcinogen                                                      | Carcinogen                                                          |
| Distance           | 0.577                                                               | 0.624                                                               | 0.627                                                               |
| Reference          | US FDA (Centre for Drug Eval.& Res./Off. Testing & Res.) Sept. 1997 | US FDA (Centre for Drug Eval.& Res./Off. Testing & Res.) Sept. 1997 | US FDA (Centre for Drug Eval.& Res./Off. Testing & Res.) Sept. 1997 |

## Model Applicability

Unknown features are fingerprint features in the query molecule, but not found or appearing too infrequently in the training set.

1. All properties and OPS components are within expected ranges.
2. Unknown ECFP\_2 feature: -1597579789: [\*]:n:[c]1:s:[\*]:[\*]:[c]:1:[\*]

## Feature Contribution

### Top features for positive contribution

| Fingerprint | Bit/Smiles | Feature Structure                             | Score | Carcinogen in training set |
|-------------|------------|-----------------------------------------------|-------|----------------------------|
| ECFP_12     | 85262808   | <br><chem>[*][c]1:[*]:[*]:[c]([*]):s:1</chem> | 0.851 | 5 out of 5                 |

|                                               |                   |                                                                                                                                                                        |              |                                   |
|-----------------------------------------------|-------------------|------------------------------------------------------------------------------------------------------------------------------------------------------------------------|--------------|-----------------------------------|
| ECFP_12                                       | 553181281         | <p>AND Enantiomer</p> 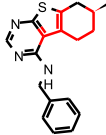 <p><chem>[*][C@@H]1[*][c]2[*]:[*][c]([*])[c]:2CC1</chem></p> | 0.613        | 2 out of 2                        |
| ECFP_12                                       | 914325265         | <p>AND Enantiomer</p>  <p><chem>[*]:s:[*]</chem></p>                                | 0.516        | 8 out of 14                       |
| <b>Top Features for negative contribution</b> |                   |                                                                                                                                                                        |              |                                   |
| <b>Fingerprint</b>                            | <b>Bit/Smiles</b> | <b>Feature Structure</b>                                                                                                                                               | <b>Score</b> | <b>Carcinogen in training set</b> |
| ECFP_12                                       | -281505363        | <p>AND Enantiomer</p>  <p><chem>[*][c]1:[cH]:[cH]:[cH]:[cH]:[cH]:[cH]:1</chem></p>  | -0.56        | 11 out of 64                      |
| ECFP_12                                       | 1571214559        | <p>AND Enantiomer</p>  <p><chem>[*]1:[cH]:[cH]:[cH]:[cH]:[cH]:[cH]:1</chem></p>    | -0.56        | 11 out of 64                      |
| ECFP_12                                       | 491100606         | <p>AND Enantiomer</p>  <p><chem>[*]CN[c](:[*]):[*]</chem></p>                     | -0.485       | 0 out of 2                        |

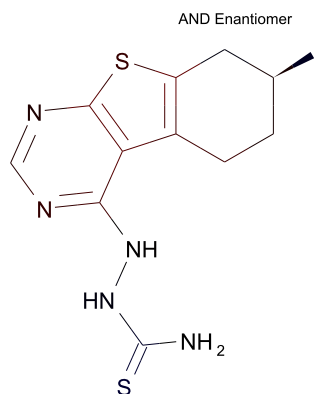

$C_{12}H_{15}N_5S_2$   
 Molecular Weight: 293.411  
 ALogP: 3.209  
 Rotatable Bonds: 3  
 Acceptors: 4  
 Donors: 3

## Model Prediction

**Prediction: Carcinogen**

Probability: 0.328

Enrichment: 1.02

Bayesian Score: 1.35

Mahalanobis Distance: 11.9

Mahalanobis Distance p-value: 0.00572

Prediction: Positive if the Bayesian score is above the estimated best cutoff value from minimizing the false positive and false negative rate.

Probability: The estimated probability that the sample is in the positive category. This assumes that the Bayesian score follows a normal distribution and is different from the prediction using a cutoff.

Enrichment: An estimate of enrichment, that is, the increased likelihood (versus random) of this sample being in the category.

Bayesian Score: The standard Laplacian-modified Bayesian score.

Mahalanobis Distance: The Mahalanobis distance (MD) is the distance to the center of the training data. The larger the MD, the less trustworthy the prediction.

Mahalanobis Distance p-value: The p-value gives the fraction of training data with an MD greater than or equal to the one for the given sample, assuming normally distributed data. The smaller the p-value, the less trustworthy the prediction. For highly non-normal X properties (e.g., fingerprints), the MD p-value is wildly inaccurate.

## Structural Similar Compounds

| Name               | Furoseamide                                                                         | Phenazopyridine                                                                     | Niclosamide                                                                         |
|--------------------|-------------------------------------------------------------------------------------|-------------------------------------------------------------------------------------|-------------------------------------------------------------------------------------|
| Structure          | 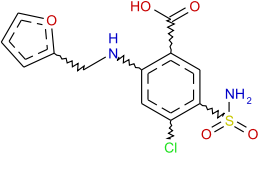 |  |  |
| Actual Endpoint    | Non-Carcinogen                                                                      | Carcinogen                                                                          | Non-Carcinogen                                                                      |
| Predicted Endpoint | Non-Carcinogen                                                                      | Carcinogen                                                                          | Non-Carcinogen                                                                      |
| Distance           | 0.724                                                                               | 0.738                                                                               | 0.738                                                                               |
| Reference          | US FDA (Centre for Drug Eval.& Res./Off. Testing & Res.) Sept. 1997                 | US FDA (Centre for Drug Eval.& Res./Off. Testing & Res.) Sept. 1997                 | US FDA (Centre for Drug Eval.& Res./Off. Testing & Res.) Sept. 1997                 |

## Model Applicability

Unknown features are fingerprint features in the query molecule, but not found or appearing too infrequently in the training set.

1. All properties and OPS components are within expected ranges.
2. Unknown ECFP\_2 feature: -1597579789: [\*]:n:[c]1:s:[\*]:[\*]:[c]:1:[\*]
3. Unknown ECFP\_2 feature: -1238415266: [\*]NN[c]([\*]):[\*]
4. Unknown ECFP\_2 feature: -571028867: [\*]NC(=S)N

## Feature Contribution

### Top features for positive contribution

| Fingerprint | Bit/Smiles | Feature Structure                                                                                                                  | Score | Carcinogen in training set |
|-------------|------------|------------------------------------------------------------------------------------------------------------------------------------|-------|----------------------------|
| ECFP_12     | 85262808   | 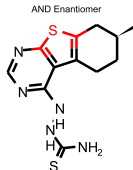<br><chem>[*][c]1:[*]:[*]:[c]([*]):s:1</chem> | 0.851 | 5 out of 5                 |

|                                               |                   |                                                                                                                                                                 |              |                                   |
|-----------------------------------------------|-------------------|-----------------------------------------------------------------------------------------------------------------------------------------------------------------|--------------|-----------------------------------|
| ECFP_12                                       | 553181281         | <p>AND Enantiomer</p> 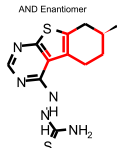 <p><chem>[*]C@@H1[*]c2[*]:[*]c(c[*])c2:CC1</chem></p> | 0.613        | 2 out of 2                        |
| ECFP_12                                       | 914325265         | <p>AND Enantiomer</p>  <p><chem>[*]:s:[*]</chem></p>                         | 0.516        | 8 out of 14                       |
| <b>Top Features for negative contribution</b> |                   |                                                                                                                                                                 |              |                                   |
| <b>Fingerprint</b>                            | <b>Bit/Smiles</b> | <b>Feature Structure</b>                                                                                                                                        | <b>Score</b> | <b>Carcinogen in training set</b> |
| ECFP_12                                       | 292958156         | <p>AND Enantiomer</p>  <p><chem>[*]CC(C)C[*]</chem></p>                      | -0.485       | 0 out of 2                        |
| ECFP_12                                       | 1979182050        | <p>AND Enantiomer</p>  <p><chem>[*]C(=S)[*]</chem></p>                     | -0.485       | 0 out of 2                        |
| ECFP_12                                       | 845108448         | <p>AND Enantiomer</p>  <p><chem>[*]=S</chem></p>                           | -0.485       | 0 out of 2                        |

9a

## TOPKAT\_Rat\_Female\_FDA\_None\_vs\_Carcinogen

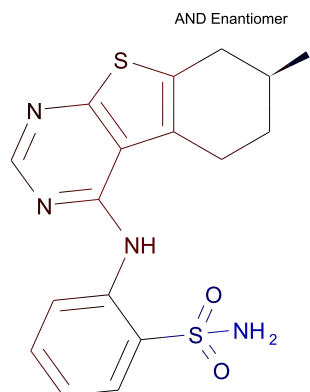C<sub>17</sub>H<sub>18</sub>N<sub>4</sub>O<sub>2</sub>S<sub>2</sub>

Molecular Weight: 374.48042

ALogP: 3.541

Rotatable Bonds: 3

Acceptors: 5

Donors: 2

**Model Prediction****Prediction: Carcinogen**

Probability: 0.332

Enrichment: 1.03

Bayesian Score: 1.53

Mahalanobis Distance: 12.2

Mahalanobis Distance p-value: 0.00246

Prediction: Positive if the Bayesian score is above the estimated best cutoff value from minimizing the false positive and false negative rate.

Probability: The estimated probability that the sample is in the positive category. This assumes that the Bayesian score follows a normal distribution and is different from the prediction using a cutoff.

Enrichment: An estimate of enrichment, that is, the increased likelihood (versus random) of this sample being in the category.

Bayesian Score: The standard Laplacian-modified Bayesian score.

Mahalanobis Distance: The Mahalanobis distance (MD) is the distance to the center of the training data. The larger the MD, the less trustworthy the prediction.

Mahalanobis Distance p-value: The p-value gives the fraction of training data with an MD greater than or equal to the one for the given sample, assuming normally distributed data. The smaller the p-value, the less trustworthy the prediction. For highly non-normal X properties (e.g., fingerprints), the MD p-value is wildly inaccurate.

**Structural Similar Compounds**

| Name               | Indapamide                                                          | Niclosamide                                                         | Metolazone                                                          |
|--------------------|---------------------------------------------------------------------|---------------------------------------------------------------------|---------------------------------------------------------------------|
| Structure          |                                                                     |                                                                     |                                                                     |
| Actual Endpoint    | Non-Carcinogen                                                      | Non-Carcinogen                                                      | Non-Carcinogen                                                      |
| Predicted Endpoint | Non-Carcinogen                                                      | Non-Carcinogen                                                      | Non-Carcinogen                                                      |
| Distance           | 0.598                                                               | 0.625                                                               | 0.635                                                               |
| Reference          | US FDA (Centre for Drug Eval.& Res./Off. Testing & Res.) Sept. 1997 | US FDA (Centre for Drug Eval.& Res./Off. Testing & Res.) Sept. 1997 | US FDA (Centre for Drug Eval.& Res./Off. Testing & Res.) Sept. 1997 |

**Model Applicability**

Unknown features are fingerprint features in the query molecule, but not found or appearing too infrequently in the training set.

1. All properties and OPS components are within expected ranges.
2. Unknown ECFP<sub>2</sub> feature: -1597579789: [\*]:n:[c]1:s:[\*]:[\*]:[c]:1:[\*]

**Feature Contribution****Top features for positive contribution**

| Fingerprint        | Bit/Smiles | Feature Structure                                         | Score | Carcinogen in training set |
|--------------------|------------|-----------------------------------------------------------|-------|----------------------------|
| ECFP <sub>12</sub> | 85262808   | <p>AND Enantiomer</p> <p>[*][c]1:[*]:[*]:[c]([*]):s:1</p> | 0.851 | 5 out of 5                 |



|                                               |                   |                                                                                                                                                                     |              |                                   |
|-----------------------------------------------|-------------------|---------------------------------------------------------------------------------------------------------------------------------------------------------------------|--------------|-----------------------------------|
| ECFP_12                                       | 553181281         | <p>AND Enantiomer</p>  <p><chem>[*]C@@H1[*]c2[*]:[*]c([*])c2:CC1</chem></p>       | 0.613        | 2 out of 2                        |
| ECFP_12                                       | 914325265         | <p>AND Enantiomer</p>  <p><chem>[*]:s:[*]</chem></p>                             | 0.516        | 8 out of 14                       |
| <b>Top Features for negative contribution</b> |                   |                                                                                                                                                                     |              |                                   |
| <b>Fingerprint</b>                            | <b>Bit/Smiles</b> | <b>Feature Structure</b>                                                                                                                                            | <b>Score</b> | <b>Carcinogen in training set</b> |
| ECFP_12                                       | -934226723        | <p>AND Enantiomer</p>  <p><chem>[*]S(=[*])(=[*])N</chem></p>                     | -1.16        | 0 out of 7                        |
| ECFP_12                                       | -450780499        | <p>AND Enantiomer</p>  <p><chem>[*][c]([*]):[c](:[cH]:[*])S(=O)(=O)N</chem></p> | -1.06        | 0 out of 6                        |
| ECFP_12                                       | -2121766239       | <p>AND Enantiomer</p>  <p><chem>[*]:[c]([*])S(=O)(=O)N</chem></p>              | -1.06        | 0 out of 6                        |

9b

## TOPKAT\_Rat\_Female\_FDA\_None\_vs\_Carcinogen

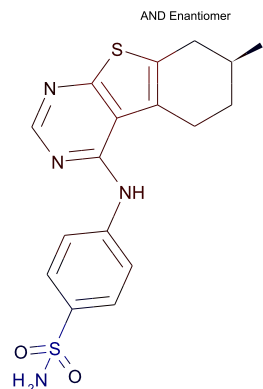C<sub>17</sub>H<sub>18</sub>N<sub>4</sub>O<sub>2</sub>S<sub>2</sub>

Molecular Weight: 374.48042

ALogP: 3.541

Rotatable Bonds: 3

Acceptors: 5

Donors: 2

**Model Prediction****Prediction: Carcinogen**

Probability: 0.341

Enrichment: 1.06

Bayesian Score: 1.92

Mahalanobis Distance: 12.8

Mahalanobis Distance p-value: 0.000276

Prediction: Positive if the Bayesian score is above the estimated best cutoff value from minimizing the false positive and false negative rate.

Probability: The estimated probability that the sample is in the positive category. This assumes that the Bayesian score follows a normal distribution and is different from the prediction using a cutoff.

Enrichment: An estimate of enrichment, that is, the increased likelihood (versus random) of this sample being in the category.

Bayesian Score: The standard Laplacian-modified Bayesian score.

Mahalanobis Distance: The Mahalanobis distance (MD) is the distance to the center of the training data. The larger the MD, the less trustworthy the prediction.

Mahalanobis Distance p-value: The p-value gives the fraction of training data with an MD greater than or equal to the one for the given sample, assuming normally distributed data. The smaller the p-value, the less trustworthy the prediction. For highly non-normal X properties (e.g., fingerprints), the MD p-value is wildly inaccurate.

**Structural Similar Compounds**

| Name               | Indapamide                                                          | Niclosamide                                                         | Metolazone                                                          |
|--------------------|---------------------------------------------------------------------|---------------------------------------------------------------------|---------------------------------------------------------------------|
| Structure          |                                                                     |                                                                     |                                                                     |
| Actual Endpoint    | Non-Carcinogen                                                      | Non-Carcinogen                                                      | Non-Carcinogen                                                      |
| Predicted Endpoint | Non-Carcinogen                                                      | Non-Carcinogen                                                      | Non-Carcinogen                                                      |
| Distance           | 0.614                                                               | 0.629                                                               | 0.650                                                               |
| Reference          | US FDA (Centre for Drug Eval.& Res./Off. Testing & Res.) Sept. 1997 | US FDA (Centre for Drug Eval.& Res./Off. Testing & Res.) Sept. 1997 | US FDA (Centre for Drug Eval.& Res./Off. Testing & Res.) Sept. 1997 |

**Model Applicability**

Unknown features are fingerprint features in the query molecule, but not found or appearing too infrequently in the training set.

1. All properties and OPS components are within expected ranges.
2. Unknown ECFP\_2 feature: -1597579789: [\*]:n:[c]1:s:[\*]:[\*]:[c]:1:[\*]

**Feature Contribution****Top features for positive contribution**

| Fingerprint | Bit/Smiles | Feature Structure                     | Score | Carcinogen in training set |
|-------------|------------|---------------------------------------|-------|----------------------------|
| ECFP_12     | 85262808   | <br>[*][c]1:[*]:[*]:[c](:<br>[*]):s:1 | 0.851 | 5 out of 5                 |

|                                               |                   |                                                                                                                                                                  |              |                                   |
|-----------------------------------------------|-------------------|------------------------------------------------------------------------------------------------------------------------------------------------------------------|--------------|-----------------------------------|
| ECFP_12                                       | 553181281         | <p>AND Enantiomer</p> 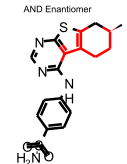 <p><chem>[*]C@@H1[*](c2[*]:[*]c(c[*])c2)CC1</chem></p> | 0.613        | 2 out of 2                        |
| ECFP_12                                       | -177077903        | <p>AND Enantiomer</p>  <p><chem>[*]N[c](:[cH]:[*]):[cH]:[*]</chem></p>        | 0.529        | 6 out of 10                       |
| <b>Top Features for negative contribution</b> |                   |                                                                                                                                                                  |              |                                   |
| <b>Fingerprint</b>                            | <b>Bit/Smiles</b> | <b>Feature Structure</b>                                                                                                                                         | <b>Score</b> | <b>Carcinogen in training set</b> |
| ECFP_12                                       | -934226723        | <p>AND Enantiomer</p>  <p><chem>[*]S(=[*])(=[*])N</chem></p>                  | -1.16        | 0 out of 7                        |
| ECFP_12                                       | -2121766239       | <p>AND Enantiomer</p>  <p><chem>[*]:c(:[*])S(=O)(=O)N</chem></p>             | -1.06        | 0 out of 6                        |
| ECFP_12                                       | 292958156         | <p>AND Enantiomer</p>  <p><chem>[*]CC(C)C[*]</chem></p>                     | -0.485       | 0 out of 2                        |

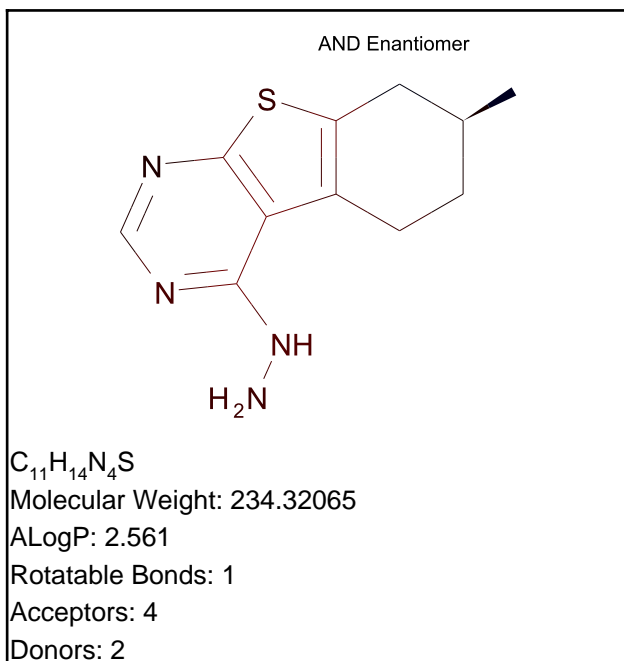

### Model Prediction

Prediction: **Carcinogen**

Probability: 0.43

Enrichment: 1.34

Bayesian Score: 5.09

Mahalanobis Distance: 11.9

Mahalanobis Distance p-value: 0.00578

Prediction: Positive if the Bayesian score is above the estimated best cutoff value from minimizing the false positive and false negative rate.

Probability: The estimated probability that the sample is in the positive category. This assumes that the Bayesian score follows a normal distribution and is different from the prediction using a cutoff.

Enrichment: An estimate of enrichment, that is, the increased likelihood (versus random) of this sample being in the category.

Bayesian Score: The standard Laplacian-modified Bayesian score.

Mahalanobis Distance: The Mahalanobis distance (MD) is the distance to the center of the training data. The larger the MD, the less trustworthy the prediction.

Mahalanobis Distance p-value: The p-value gives the fraction of training data with an MD greater than or equal to the one for the given sample, assuming normally distributed data. The smaller the p-value, the less trustworthy the prediction. For highly non-normal X properties (e.g., fingerprints), the MD p-value is wildly inaccurate.

### Structural Similar Compounds

| Name               | Lamotrigine                                                                         | Phenazopyridine                                                                     | Dapsone                                                                             |
|--------------------|-------------------------------------------------------------------------------------|-------------------------------------------------------------------------------------|-------------------------------------------------------------------------------------|
| Structure          | 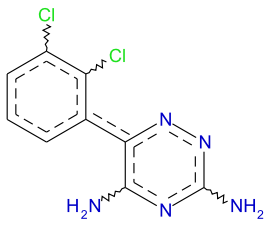 |  |  |
| Actual Endpoint    | Non-Carcinogen                                                                      | Carcinogen                                                                          | Carcinogen                                                                          |
| Predicted Endpoint | Non-Carcinogen                                                                      | Carcinogen                                                                          | Carcinogen                                                                          |
| Distance           | 0.578                                                                               | 0.594                                                                               | 0.606                                                                               |
| Reference          | US FDA (Centre for Drug Eval.& Res./Off. Testing & Res.) Sept. 1997                 | US FDA (Centre for Drug Eval.& Res./Off. Testing & Res.) Sept. 1997                 | US FDA (Centre for Drug Eval.& Res./Off. Testing & Res.) Sept. 1997                 |

### Model Applicability

Unknown features are fingerprint features in the query molecule, but not found or appearing too infrequently in the training set.

1. All properties and OPS components are within expected ranges.
2. Unknown ECFP\_2 feature: -1597579789: [\*]:n:[c]1:s:[\*]:[\*]:[c]:1:[\*]

### Feature Contribution

#### Top features for positive contribution

| Fingerprint | Bit/Smiles | Feature Structure                                                                                                                                     | Score | Carcinogen in training set |
|-------------|------------|-------------------------------------------------------------------------------------------------------------------------------------------------------|-------|----------------------------|
| ECFP_12     | 85262808   | <p>AND Enantiomer</p> 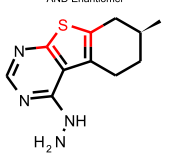 <p>[*][c]1:[*]:[*]:[c](:<br/>[*]):s:1</p> | 0.851 | 5 out of 5                 |

|                                               |                   |                                                                                                                                                               |              |                                   |
|-----------------------------------------------|-------------------|---------------------------------------------------------------------------------------------------------------------------------------------------------------|--------------|-----------------------------------|
| ECFP_12                                       | 553181281         | <p>AND Enantiomer</p> 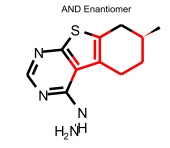 <p>[*]C@[H]1[*]c2[*]<br/>:[*]c(c[*])c:2<br/>CC1</p> | 0.613        | 2 out of 2                        |
| ECFP_12                                       | 914325265         | <p>AND Enantiomer</p>  <p>[*]:s:[*]</p>                                    | 0.516        | 8 out of 14                       |
| <b>Top Features for negative contribution</b> |                   |                                                                                                                                                               |              |                                   |
| <b>Fingerprint</b>                            | <b>Bit/Smiles</b> | <b>Feature Structure</b>                                                                                                                                      | <b>Score</b> | <b>Carcinogen in training set</b> |
| ECFP_12                                       | 292958156         | <p>AND Enantiomer</p>  <p>[*]CC(C)C[*]</p>                                 | -0.485       | 0 out of 2                        |
| ECFP_12                                       | -1672647522       | <p>AND Enantiomer</p>  <p>[*]C[c]1:s:[*]:[*]:[c<br/>]:1[*]</p>           | -0.272       | 0 out of 1                        |
| ECFP_12                                       | 865482986         | <p>AND Enantiomer</p>  <p>[*]C([*])C</p>                                 | -0.233       | 4 out of 17                       |

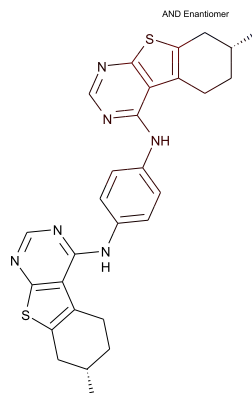
 $C_{28}H_{28}N_6S_2$ 

Molecular Weight: 512.69212

ALogP: 7.842

Rotatable Bonds: 4

Acceptors: 6

Donors: 2

## Model Prediction

Prediction: **Carcinogen**

Probability: 0.401

Enrichment: 1.25

Bayesian Score: 4.13

Mahalanobis Distance: 13.2

Mahalanobis Distance p-value: 7.35e-005

Prediction: Positive if the Bayesian score is above the estimated best cutoff value from minimizing the false positive and false negative rate.

Probability: The estimated probability that the sample is in the positive category. This assumes that the Bayesian score follows a normal distribution and is different from the prediction using a cutoff.

Enrichment: An estimate of enrichment, that is, the increased likelihood (versus random) of this sample being in the category.

Bayesian Score: The standard Laplacian-modified Bayesian score.

Mahalanobis Distance: The Mahalanobis distance (MD) is the distance to the center of the training data. The larger the MD, the less trustworthy the prediction.

Mahalanobis Distance p-value: The p-value gives the fraction of training data with an MD greater than or equal to the one for the given sample, assuming normally distributed data. The smaller the p-value, the less trustworthy the prediction. For highly non-normal X properties (e.g., fingerprints), the MD p-value is wildly inaccurate.

## Structural Similar Compounds

| Name               | ProbucoI                                                            | Emetine                                                             | Bromocriptine                                                       |
|--------------------|---------------------------------------------------------------------|---------------------------------------------------------------------|---------------------------------------------------------------------|
| Structure          |                                                                     |                                                                     |                                                                     |
| Actual Endpoint    | Non-Carcinogen                                                      | Non-Carcinogen                                                      | Carcinogen                                                          |
| Predicted Endpoint | Non-Carcinogen                                                      | Non-Carcinogen                                                      | Carcinogen                                                          |
| Distance           | 0.878                                                               | 0.906                                                               | 0.927                                                               |
| Reference          | US FDA (Centre for Drug Eval.& Res./Off. Testing & Res.) Sept. 1997 | US FDA (Centre for Drug Eval.& Res./Off. Testing & Res.) Sept. 1997 | US FDA (Centre for Drug Eval.& Res./Off. Testing & Res.) Sept. 1997 |

## Model Applicability

Unknown features are fingerprint features in the query molecule, but not found or appearing too infrequently in the training set.

- All properties and OPS components are within expected ranges.
- Unknown ECFP\_2 feature: -1597579789: [\*]:n:[c]1:s:[\*]:[\*]:[c]:1:[\*]

## Feature Contribution

### Top features for positive contribution

| Fingerprint | Bit/Smiles | Feature Structure                                               | Score | Carcinogen in training set |
|-------------|------------|-----------------------------------------------------------------|-------|----------------------------|
| ECFP_12     | 85262808   | <p>AND Enantiomer</p> <p>[*][c]1:[*]:[*]:[c](:<br/>[*]):s:1</p> | 0.851 | 5 out of 5                 |

|                                               |                   |                                                                                                                                                              |              |                                   |
|-----------------------------------------------|-------------------|--------------------------------------------------------------------------------------------------------------------------------------------------------------|--------------|-----------------------------------|
| ECFP_12                                       | 553181281         | <p>AND Enantiomer</p>  <p>[*]C@@H1[*]c2[*]<br/>:[*]c[*]c[*]c2<br/>CC1</p> | 0.613        | 2 out of 2                        |
| ECFP_12                                       | -177077903        | <p>AND Enantiomer</p>  <p>[*]N[c](:[cH]:[*]):[c<br/>H]:[*]</p>            | 0.529        | 6 out of 10                       |
| <b>Top Features for negative contribution</b> |                   |                                                                                                                                                              |              |                                   |
| <b>Fingerprint</b>                            | <b>Bit/Smiles</b> | <b>Feature Structure</b>                                                                                                                                     | <b>Score</b> | <b>Carcinogen in training set</b> |
| ECFP_12                                       | 292958156         | <p>AND Enantiomer</p>  <p>[*]CC(C)C[*]</p>                                | -0.485       | 0 out of 2                        |
| ECFP_12                                       | -1672647522       | <p>AND Enantiomer</p>  <p>[*]C[c]1:s:[*]:[*]:[c<br/>]:1[*]</p>           | -0.272       | 0 out of 1                        |
| ECFP_12                                       | 865482986         | <p>AND Enantiomer</p>  <p>[*]C[*]C</p>                                  | -0.233       | 4 out of 17                       |

# Erlotinib

# TOPKAT\_Rat\_Female\_FDA\_None\_vs\_Carcinogen

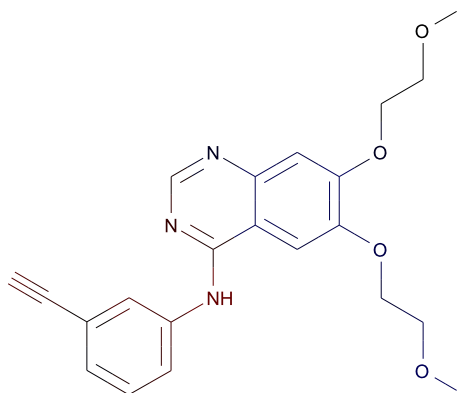

$C_{22}H_{23}N_3O_4$

Molecular Weight: 393.43572

ALogP: 4.309

Rotatable Bonds: 10

Acceptors: 7

Donors: 1

## Model Prediction

**Prediction: Carcinogen**

Probability: 0.285

Enrichment: 0.885

Bayesian Score: -0.692

Mahalanobis Distance: 16.3

Mahalanobis Distance p-value: 1.65e-011

Prediction: Positive if the Bayesian score is above the estimated best cutoff value from minimizing the false positive and false negative rate.

Probability: The estimated probability that the sample is in the positive category. This assumes that the Bayesian score follows a normal distribution and is different from the prediction using a cutoff.

Enrichment: An estimate of enrichment, that is, the increased likelihood (versus random) of this sample being in the category.

Bayesian Score: The standard Laplacian-modified Bayesian score.

Mahalanobis Distance: The Mahalanobis distance (MD) is the distance to the center of the training data. The larger the MD, the less trustworthy the prediction.

Mahalanobis Distance p-value: The p-value gives the fraction of training data with an MD greater than or equal to the one for the given sample, assuming normally distributed data. The smaller the p-value, the less trustworthy the prediction. For highly non-normal X properties (e.g., fingerprints), the MD p-value is wildly inaccurate.

## Structural Similar Compounds

| Name               | Mycophenolate                                                       | Nicardipine                                                         | Nimodipine                                                          |
|--------------------|---------------------------------------------------------------------|---------------------------------------------------------------------|---------------------------------------------------------------------|
| Structure          |                                                                     |                                                                     |                                                                     |
| Actual Endpoint    | Non-Carcinogen                                                      | Carcinogen                                                          | Non-Carcinogen                                                      |
| Predicted Endpoint | Non-Carcinogen                                                      | Carcinogen                                                          | Non-Carcinogen                                                      |
| Distance           | 0.644                                                               | 0.660                                                               | 0.675                                                               |
| Reference          | US FDA (Centre for Drug Eval.& Res./Off. Testing & Res.) Sept. 1997 | US FDA (Centre for Drug Eval.& Res./Off. Testing & Res.) Sept. 1997 | US FDA (Centre for Drug Eval.& Res./Off. Testing & Res.) Sept. 1997 |

## Model Applicability

Unknown features are fingerprint features in the query molecule, but not found or appearing too infrequently in the training set.

- OPS PC28 out of range. Value: 3.6564. Training min, max, SD, explained variance: -2.8936, 3.5771, 1.028, 0.0111.
- Unknown ECFP\_2 feature: 1139738044: [\*]:[c](:[\*])C#C

## Feature Contribution

### Top features for positive contribution

| Fingerprint | Bit/Smiles  | Feature Structure | Score | Carcinogen in training set |
|-------------|-------------|-------------------|-------|----------------------------|
| ECFP_12     | -1545539812 | <br>[*]C#C        | 0.78  | 8 out of 10                |



|                                               |                   |                                                                                                                                                |              |                                   |
|-----------------------------------------------|-------------------|------------------------------------------------------------------------------------------------------------------------------------------------|--------------|-----------------------------------|
| ECFP_12                                       | -1939823063       | 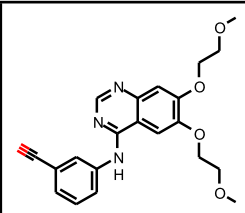<br>[*]#C                                                    | 0.78         | 8 out of 10                       |
| ECFP_12                                       | -177077903        | <br>[*]N[c](:[cH];[*]):[cH]:[*]                             | 0.529        | 6 out of 10                       |
| <b>Top Features for negative contribution</b> |                   |                                                                                                                                                |              |                                   |
| <b>Fingerprint</b>                            | <b>Bit/Smiles</b> | <b>Feature Structure</b>                                                                                                                       | <b>Score</b> | <b>Carcinogen in training set</b> |
| ECFP_12                                       | -2063600634       | <br>[*]O[c]1:[cH]:[c](:[c]([*]):[*]):[c](:[*]):[*]:[c]:1[*] | -0.661       | 0 out of 3                        |
| ECFP_12                                       | -1253653003       | <br>[*]COC                                                 | -0.661       | 0 out of 3                        |
| ECFP_12                                       | -2063202154       | <br>[*]O[c]1:[cH]:[c](:n:[*]):[c](:[*]):[*]:[c]:1[*]      | -0.661       | 0 out of 3                        |

5a

TOPKAT\_Rat\_Female\_FDA\_Single\_vs\_Multiple

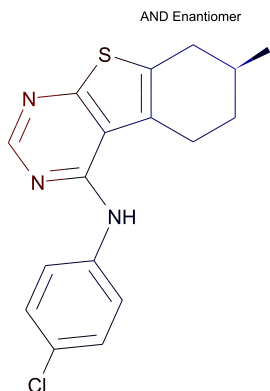C<sub>17</sub>H<sub>16</sub>ClN<sub>3</sub>S

Molecular Weight: 329.84704

ALogP: 5.5

Rotatable Bonds: 2

Acceptors: 3

Donors: 1

**Model Prediction**

Prediction: Single-Carcinogen

Probability: 0.441

Enrichment: 1.18

Bayesian Score: -2.22

Mahalanobis Distance: 10.5

Mahalanobis Distance p-value: 0.029

Prediction: Positive if the Bayesian score is above the estimated best cutoff value from minimizing the false positive and false negative rate.

Probability: The estimated probability that the sample is in the positive category. This assumes that the Bayesian score follows a normal distribution and is different from the prediction using a cutoff.

Enrichment: An estimate of enrichment, that is, the increased likelihood (versus random) of this sample being in the category.

Bayesian Score: The standard Laplacian-modified Bayesian score.

Mahalanobis Distance: The Mahalanobis distance (MD) is the distance to the center of the training data. The larger the MD, the less trustworthy the prediction.

Mahalanobis Distance p-value: The p-value gives the fraction of training data with an MD greater than or equal to the one for the given sample, assuming normally distributed data. The smaller the p-value, the less trustworthy the prediction. For highly non-normal X properties (e.g., fingerprints), the MD p-value is wildly inaccurate.

**Structural Similar Compounds**

| Name               | Mestranol                                                           | Pergolide                                                           | Brotizolam                                                          |
|--------------------|---------------------------------------------------------------------|---------------------------------------------------------------------|---------------------------------------------------------------------|
| Structure          |                                                                     |                                                                     |                                                                     |
| Actual Endpoint    | Single-Carcinogen                                                   | Single-Carcinogen                                                   | Multiple-Carcinogen                                                 |
| Predicted Endpoint | Single-Carcinogen                                                   | Single-Carcinogen                                                   | Multiple-Carcinogen                                                 |
| Distance           | 0.622                                                               | 0.637                                                               | 0.694                                                               |
| Reference          | US FDA (Centre for Drug Eval.& Res./Off. Testing & Res.) Sept. 1997 | US FDA (Centre for Drug Eval.& Res./Off. Testing & Res.) Sept. 1997 | US FDA (Centre for Drug Eval.& Res./Off. Testing & Res.) Sept. 1997 |

**Model Applicability**

Unknown features are fingerprint features in the query molecule, but not found or appearing too infrequently in the training set.

1. All properties and OPS components are within expected ranges.

**Feature Contribution****Top features for positive contribution**

| Fingerprint | Bit/Smiles  | Feature Structure                                  | Score | Multiple-Carcinogen in training set |
|-------------|-------------|----------------------------------------------------|-------|-------------------------------------|
| SCFP_4      | -1065373877 | <br><chem>[*][c]1:[*]:[c](:[*]) :n:[cH]:n:1</chem> | 0.721 | 3 out of 3                          |

|                                               |                   |                                                                                                                                                                           |              |                                            |
|-----------------------------------------------|-------------------|---------------------------------------------------------------------------------------------------------------------------------------------------------------------------|--------------|--------------------------------------------|
| SCFP_4                                        | -1181430618       | <p>AND Enantiomer</p> 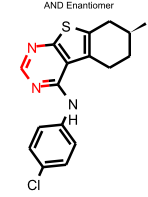 <p>[*]:n:[cH]:n:[*]</p>                                         | 0.663        | 4 out of 5                                 |
| SCFP_4                                        | 17                | <p>AND Enantiomer</p>  <p>[*]:s:[*]</p>                                                | 0.548        | 10 out of 17                               |
| <b>Top Features for negative contribution</b> |                   |                                                                                                                                                                           |              |                                            |
| <b>Fingerprint</b>                            | <b>Bit/Smiles</b> | <b>Feature Structure</b>                                                                                                                                                  | <b>Score</b> | <b>Multiple-Carcinogen in training set</b> |
| SCFP_4                                        | -1272709286       | <p>AND Enantiomer</p>  <p>[*]C([*])C[c](:[*]):[*]</p>                                  | -1.16        | 1 out of 17                                |
| SCFP_4                                        | -1849867720       | <p>AND Enantiomer</p>  <p>[*]C@@H[*]c2[*]<br/>:[*]e[*]:c:2<br/>CC1</p>               | -0.73        | 1 out of 10                                |
| SCFP_4                                        | 112346096         | <p>AND Enantiomer</p>  <p>[*][c](:[*]):[c]1:[c]<br/>([*]):[*]:[*]:[c]:1:<br/>[*]</p> | -0.73        | 1 out of 10                                |



5b

TOPKAT\_Rat\_Female\_FDA\_Single\_vs\_Multiple

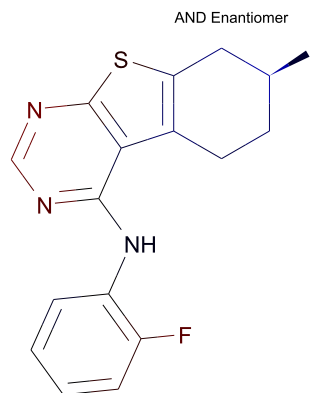C<sub>17</sub>H<sub>16</sub>FN<sub>3</sub>S

Molecular Weight: 313.39244

ALogP: 5.041

Rotatable Bonds: 2

Acceptors: 3

Donors: 1

**Model Prediction**

Prediction: Single-Carcinogen

Probability: 0.496

Enrichment: 1.33

Bayesian Score: -0.556

Mahalanobis Distance: 11.8

Mahalanobis Distance p-value: 0.00242

Prediction: Positive if the Bayesian score is above the estimated best cutoff value from minimizing the false positive and false negative rate.

Probability: The estimated probability that the sample is in the positive category. This assumes that the Bayesian score follows a normal distribution and is different from the prediction using a cutoff.

Enrichment: An estimate of enrichment, that is, the increased likelihood (versus random) of this sample being in the category.

Bayesian Score: The standard Laplacian-modified Bayesian score.

Mahalanobis Distance: The Mahalanobis distance (MD) is the distance to the center of the training data. The larger the MD, the less trustworthy the prediction.

Mahalanobis Distance p-value: The p-value gives the fraction of training data with an MD greater than or equal to the one for the given sample, assuming normally distributed data. The smaller the p-value, the less trustworthy the prediction. For highly non-normal X properties (e.g., fingerprints), the MD p-value is wildly inaccurate.

**Structural Similar Compounds**

| Name               | Pergolide                                                           | Mestranol                                                           | Flurbiprofen                                                        |
|--------------------|---------------------------------------------------------------------|---------------------------------------------------------------------|---------------------------------------------------------------------|
| Structure          |                                                                     |                                                                     |                                                                     |
| Actual Endpoint    | Single-Carcinogen                                                   | Single-Carcinogen                                                   | Multiple-Carcinogen                                                 |
| Predicted Endpoint | Single-Carcinogen                                                   | Single-Carcinogen                                                   | Multiple-Carcinogen                                                 |
| Distance           | 0.612                                                               | 0.621                                                               | 0.647                                                               |
| Reference          | US FDA (Centre for Drug Eval.& Res./Off. Testing & Res.) Sept. 1997 | US FDA (Centre for Drug Eval.& Res./Off. Testing & Res.) Sept. 1997 | US FDA (Centre for Drug Eval.& Res./Off. Testing & Res.) Sept. 1997 |

**Model Applicability**

Unknown features are fingerprint features in the query molecule, but not found or appearing too infrequently in the training set.

1. All properties and OPS components are within expected ranges.

**Feature Contribution****Top features for positive contribution**

| Fingerprint | Bit/Smiles  | Feature Structure                                  | Score | Multiple-Carcinogen in training set |
|-------------|-------------|----------------------------------------------------|-------|-------------------------------------|
| SCFP_4      | -1065373877 | <br><chem>[*][c]1:[*]:[c](:[*]) :n:[cH]:n:1</chem> | 0.721 | 3 out of 3                          |

|                                               |                   |                                                                                                                                                                 |              |                                            |
|-----------------------------------------------|-------------------|-----------------------------------------------------------------------------------------------------------------------------------------------------------------|--------------|--------------------------------------------|
| SCFP_4                                        | -1181430618       | <p>AND Enantiomer</p> 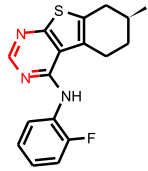 <p>[*]:n:[cH]:n:[*]</p>                               | 0.663        | 4 out of 5                                 |
| SCFP_4                                        | -730654023        | <p>AND Enantiomer</p>  <p>[*][c](:[*]):[c](F):[cH]:[*]</p>                   | 0.571        | 3 out of 4                                 |
| <b>Top Features for negative contribution</b> |                   |                                                                                                                                                                 |              |                                            |
| <b>Fingerprint</b>                            | <b>Bit/Smiles</b> | <b>Feature Structure</b>                                                                                                                                        | <b>Score</b> | <b>Multiple-Carcinogen in training set</b> |
| SCFP_4                                        | -1272709286       | <p>AND Enantiomer</p>  <p>[*]C([*])C[c](:[*]):[*]</p>                        | -1.16        | 1 out of 17                                |
| SCFP_4                                        | -1849867720       | <p>AND Enantiomer</p>  <p>[*]C@@H1[*]c2[*]:[*]e([*]):c:2 CC1</p>           | -0.73        | 1 out of 10                                |
| SCFP_4                                        | 112346096         | <p>AND Enantiomer</p>  <p>[*][c](:[*]):[c]1:[c]([*]):[*]:[*]:[c]:1:[*]</p> | -0.73        | 1 out of 10                                |



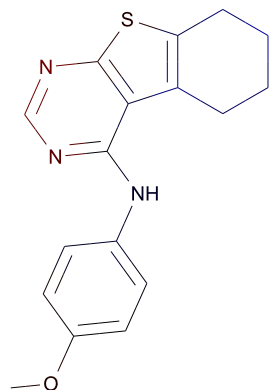

$C_{17}H_{17}N_3OS$

Molecular Weight: 311.40138

ALogP: 4.568

Rotatable Bonds: 3

Acceptors: 4

Donors: 1

## Model Prediction

Prediction: Single-Carcinogen

Probability: 0.467

Enrichment: 1.25

Bayesian Score: -1.5

Mahalanobis Distance: 14.1

Mahalanobis Distance p-value: 2.16e-005

Prediction: Positive if the Bayesian score is above the estimated best cutoff value from minimizing the false positive and false negative rate.

Probability: The estimated probability that the sample is in the positive category. This assumes that the Bayesian score follows a normal distribution and is different from the prediction using a cutoff.

Enrichment: An estimate of enrichment, that is, the increased likelihood (versus random) of this sample being in the category.

Bayesian Score: The standard Laplacian-modified Bayesian score.

Mahalanobis Distance: The Mahalanobis distance (MD) is the distance to the center of the training data. The larger the MD, the less trustworthy the prediction.

Mahalanobis Distance p-value: The p-value gives the fraction of training data with an MD greater than or equal to the one for the given sample, assuming normally distributed data. The smaller the p-value, the less trustworthy the prediction. For highly non-normal X properties (e.g., fingerprints), the MD p-value is wildly inaccurate.

## Structural Similar Compounds

| Name               | Estrogens; conjug.                                                  | Omeprazole                                                          | Cytembena                                                           |
|--------------------|---------------------------------------------------------------------|---------------------------------------------------------------------|---------------------------------------------------------------------|
| Structure          |                                                                     |                                                                     |                                                                     |
| Actual Endpoint    | Single-Carcinogen                                                   | Multiple-Carcinogen                                                 | Multiple-Carcinogen                                                 |
| Predicted Endpoint | Single-Carcinogen                                                   | Multiple-Carcinogen                                                 | Multiple-Carcinogen                                                 |
| Distance           | 0.598                                                               | 0.622                                                               | 0.636                                                               |
| Reference          | US FDA (Centre for Drug Eval.& Res./Off. Testing & Res.) Sept. 1997 | US FDA (Centre for Drug Eval.& Res./Off. Testing & Res.) Sept. 1997 | US FDA (Centre for Drug Eval.& Res./Off. Testing & Res.) Sept. 1997 |

## Model Applicability

Unknown features are fingerprint features in the query molecule, but not found or appearing too infrequently in the training set.

1. All properties and OPS components are within expected ranges.

## Feature Contribution

### Top features for positive contribution

| Fingerprint | Bit/Smiles  | Feature Structure                        | Score | Multiple-Carcinogen in training set |
|-------------|-------------|------------------------------------------|-------|-------------------------------------|
| SCFP_4      | -1065373877 | <br>[*][c]1:[*]:[c](:[*])<br>:n:[cH]:n:1 | 0.721 | 3 out of 3                          |



|                                               |                   |                                                                                                                                               |              |                                            |
|-----------------------------------------------|-------------------|-----------------------------------------------------------------------------------------------------------------------------------------------|--------------|--------------------------------------------|
| SCFP_4                                        | -1181430618       | 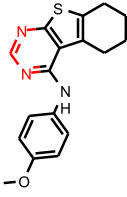<br>[*]:n:[cH]:n:[*]                                       | 0.663        | 4 out of 5                                 |
| SCFP_4                                        | 17                | <br>[*]:s:[*]                                              | 0.548        | 10 out of 17                               |
| <b>Top Features for negative contribution</b> |                   |                                                                                                                                               |              |                                            |
| <b>Fingerprint</b>                            | <b>Bit/Smiles</b> | <b>Feature Structure</b>                                                                                                                      | <b>Score</b> | <b>Multiple-Carcinogen in training set</b> |
| SCFP_4                                        | -1272709286       | <br>[*]C[*]C[c](:[*]):[*]                                  | -1.16        | 1 out of 17                                |
| SCFP_4                                        | 112346096         | <br>[*][c](:[*]):[c]1:[c]<br>([*]):[*]:[*]:[c]:1:<br>[*] | -0.73        | 1 out of 10                                |
| SCFP_4                                        | -1849867720       | <br>[*][C@@H]1[*][c]2:[*]<br>:[*][c](:[*]):[c]:2<br>CC1  | -0.73        | 1 out of 10                                |





|                                               |                   |                                                                                                                                                                    |              |                                            |
|-----------------------------------------------|-------------------|--------------------------------------------------------------------------------------------------------------------------------------------------------------------|--------------|--------------------------------------------|
| SCFP_4                                        | -1181430618       | <p>AND Enantiomer</p> 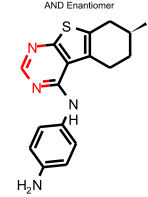 <p>[*]:n:[cH]:n:[*]</p>                                  | 0.663        | 4 out of 5                                 |
| SCFP_4                                        | 17                | <p>AND Enantiomer</p>  <p>[*]:s:[*]</p>                                         | 0.548        | 10 out of 17                               |
| <b>Top Features for negative contribution</b> |                   |                                                                                                                                                                    |              |                                            |
| <b>Fingerprint</b>                            | <b>Bit/Smiles</b> | <b>Feature Structure</b>                                                                                                                                           | <b>Score</b> | <b>Multiple-Carcinogen in training set</b> |
| SCFP_4                                        | -1272709286       | <p>AND Enantiomer</p>  <p>[*]C([*])C[c](:[*]):[*]</p>                           | -1.16        | 1 out of 17                                |
| SCFP_4                                        | -1849867720       | <p>AND Enantiomer</p>  <p>[*]C@@H1[*]c2:[*]<br/>:[*]e([*]):c:2<br/>CC1</p>     | -0.73        | 1 out of 10                                |
| SCFP_4                                        | 112346096         | <p>AND Enantiomer</p>  <p>[*]c([*]):c1:[c]<br/>([*]):[*]:[*]:c:1:<br/>[*]</p> | -0.73        | 1 out of 10                                |



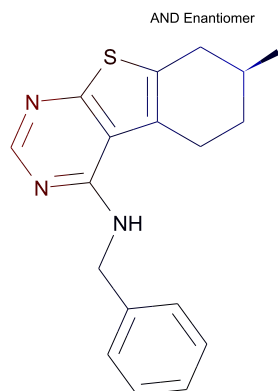

$C_{18}H_{19}N_3S$

Molecular Weight: 309.42856

ALogP: 4.678

Rotatable Bonds: 3

Acceptors: 3

Donors: 1

## Model Prediction

Prediction: Single-Carcinogen

Probability: 0.45

Enrichment: 1.2

Bayesian Score: -1.97

Mahalanobis Distance: 8.82

Mahalanobis Distance p-value: 0.283

Prediction: Positive if the Bayesian score is above the estimated best cutoff value from minimizing the false positive and false negative rate.

Probability: The estimated probability that the sample is in the positive category. This assumes that the Bayesian score follows a normal distribution and is different from the prediction using a cutoff.

Enrichment: An estimate of enrichment, that is, the increased likelihood (versus random) of this sample being in the category.

Bayesian Score: The standard Laplacian-modified Bayesian score.

Mahalanobis Distance: The Mahalanobis distance (MD) is the distance to the center of the training data. The larger the MD, the less trustworthy the prediction.

Mahalanobis Distance p-value: The p-value gives the fraction of training data with an MD greater than or equal to the one for the given sample, assuming normally distributed data. The smaller the p-value, the less trustworthy the prediction. For highly non-normal X properties (e.g., fingerprints), the MD p-value is wildly inaccurate.

## Structural Similar Compounds

| Name               | Pergolide                                                           | Flurbiprofen                                                        | Mestranol                                                           |
|--------------------|---------------------------------------------------------------------|---------------------------------------------------------------------|---------------------------------------------------------------------|
| Structure          |                                                                     |                                                                     |                                                                     |
| Actual Endpoint    | Single-Carcinogen                                                   | Multiple-Carcinogen                                                 | Single-Carcinogen                                                   |
| Predicted Endpoint | Single-Carcinogen                                                   | Multiple-Carcinogen                                                 | Single-Carcinogen                                                   |
| Distance           | 0.552                                                               | 0.630                                                               | 0.632                                                               |
| Reference          | US FDA (Centre for Drug Eval.& Res./Off. Testing & Res.) Sept. 1997 | US FDA (Centre for Drug Eval.& Res./Off. Testing & Res.) Sept. 1997 | US FDA (Centre for Drug Eval.& Res./Off. Testing & Res.) Sept. 1997 |

## Model Applicability

Unknown features are fingerprint features in the query molecule, but not found or appearing too infrequently in the training set.

1. All properties and OPS components are within expected ranges.

## Feature Contribution

### Top features for positive contribution

| Fingerprint | Bit/Smiles  | Feature Structure                                  | Score | Multiple-Carcinogen in training set |
|-------------|-------------|----------------------------------------------------|-------|-------------------------------------|
| SCFP_4      | -1065373877 | <br><chem>[*][c]1:[*]:[c](:[*]) :n:[cH]:n:1</chem> | 0.721 | 3 out of 3                          |

|                                               |                   |                                                                                                                                                                |              |                                            |
|-----------------------------------------------|-------------------|----------------------------------------------------------------------------------------------------------------------------------------------------------------|--------------|--------------------------------------------|
| SCFP_4                                        | -1181430618       | <p>AND Enantiomer</p> 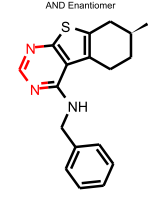 <p>[*]:n:[cH]:n:[*]</p>                              | 0.663        | 4 out of 5                                 |
| SCFP_4                                        | 17                | <p>AND Enantiomer</p>  <p>[*]:s:[*]</p>                                     | 0.548        | 10 out of 17                               |
| <b>Top Features for negative contribution</b> |                   |                                                                                                                                                                |              |                                            |
| <b>Fingerprint</b>                            | <b>Bit/Smiles</b> | <b>Feature Structure</b>                                                                                                                                       | <b>Score</b> | <b>Multiple-Carcinogen in training set</b> |
| SCFP_4                                        | -1272709286       | <p>AND Enantiomer</p>  <p>[*]C([*])C[c](-[*]):[*]</p>                       | -1.16        | 1 out of 17                                |
| SCFP_4                                        | 112346096         | <p>AND Enantiomer</p>  <p>[*][c](-[*]):[c]1:[c]([*]):[*]:[*]:[c]:1:[*]</p> | -0.73        | 1 out of 10                                |
| SCFP_4                                        | -1849867720       | <p>AND Enantiomer</p>  <p>[*]C@@H1[*][c]2:[*]:[*]:[c]([*]):[c]:2CC1</p>   | -0.73        | 1 out of 10                                |





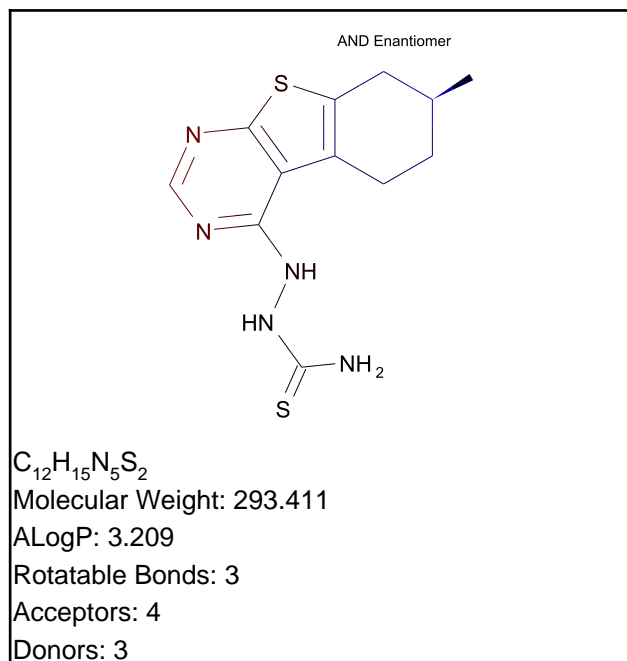

### Model Prediction

Prediction: Single-Carcinogen

Probability: 0.496

Enrichment: 1.33

Bayesian Score: -0.532

Mahalanobis Distance: 14.7

Mahalanobis Distance p-value: 5.9e-006

Prediction: Positive if the Bayesian score is above the estimated best cutoff value from minimizing the false positive and false negative rate.

Probability: The estimated probability that the sample is in the positive category. This assumes that the Bayesian score follows a normal distribution and is different from the prediction using a cutoff.

Enrichment: An estimate of enrichment, that is, the increased likelihood (versus random) of this sample being in the category.

Bayesian Score: The standard Laplacian-modified Bayesian score.

Mahalanobis Distance: The Mahalanobis distance (MD) is the distance to the center of the training data. The larger the MD, the less trustworthy the prediction.

Mahalanobis Distance p-value: The p-value gives the fraction of training data with an MD greater than or equal to the one for the given sample, assuming normally distributed data. The smaller the p-value, the less trustworthy the prediction. For highly non-normal X properties (e.g., fingerprints), the MD p-value is wildly inaccurate.

### Structural Similar Compounds

| Name               | Propylthiouracil                                                                    | Phenazopyridine                                                                     | Torseimide                                                                          |
|--------------------|-------------------------------------------------------------------------------------|-------------------------------------------------------------------------------------|-------------------------------------------------------------------------------------|
| Structure          | 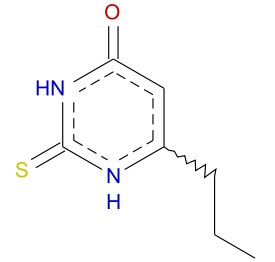 |  |  |
| Actual Endpoint    | Single-Carcinogen                                                                   | Single-Carcinogen                                                                   | Single-Carcinogen                                                                   |
| Predicted Endpoint | Single-Carcinogen                                                                   | Single-Carcinogen                                                                   | Single-Carcinogen                                                                   |
| Distance           | 0.718                                                                               | 0.731                                                                               | 0.748                                                                               |
| Reference          | US FDA (Centre for Drug Eval.& Res./Off. Testing & Res.) Sept. 1997                 | US FDA (Centre for Drug Eval.& Res./Off. Testing & Res.) Sept. 1997                 | US FDA (Centre for Drug Eval.& Res./Off. Testing & Res.) Sept. 1997                 |

### Model Applicability

Unknown features are fingerprint features in the query molecule, but not found or appearing too infrequently in the training set.

1. All properties and OPS components are within expected ranges.

### Feature Contribution

#### Top features for positive contribution

| Fingerprint | Bit/Smiles  | Feature Structure                                                                                                                       | Score | Multiple-Carcinogen in training set |
|-------------|-------------|-----------------------------------------------------------------------------------------------------------------------------------------|-------|-------------------------------------|
| SCFP_4      | -1065373877 | 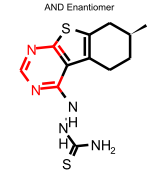<br><chem>[*][c]1:[*]:[c](:[*]) :n:[cH]:n:1</chem> | 0.721 | 3 out of 3                          |

|                                               |                   |                                                                                                                                                                 |              |                                            |
|-----------------------------------------------|-------------------|-----------------------------------------------------------------------------------------------------------------------------------------------------------------|--------------|--------------------------------------------|
| SCFP_4                                        | -1181430618       | <p>AND Enantiomer</p> 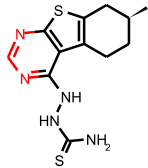 <p>[*]:n:[cH]:n:[*]</p>                               | 0.663        | 4 out of 5                                 |
| SCFP_4                                        | 17                | <p>AND Enantiomer</p>  <p>[*]:s:[*]</p>                                      | 0.548        | 10 out of 17                               |
| <b>Top Features for negative contribution</b> |                   |                                                                                                                                                                 |              |                                            |
| <b>Fingerprint</b>                            | <b>Bit/Smiles</b> | <b>Feature Structure</b>                                                                                                                                        | <b>Score</b> | <b>Multiple-Carcinogen in training set</b> |
| SCFP_4                                        | -1272709286       | <p>AND Enantiomer</p>  <p>[*]C[*]C[c](:[*]):[*]</p>                          | -1.16        | 1 out of 17                                |
| SCFP_4                                        | 112346096         | <p>AND Enantiomer</p>  <p>[*][c](:[*]):[c]1:[c]([*]):[*]:[*]:[c]:1:[*]</p> | -0.73        | 1 out of 10                                |
| SCFP_4                                        | -1849867720       | <p>AND Enantiomer</p>  <p>[*]C@@H1[*]c2:[*]:[*]c([*]):[c]2CC1</p>          | -0.73        | 1 out of 10                                |



9a

TOPKAT\_Rat\_Female\_FDA\_Single\_vs\_Multiple

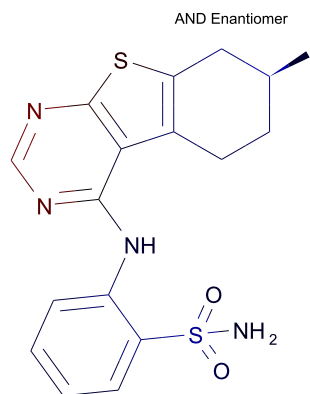C<sub>17</sub>H<sub>18</sub>N<sub>4</sub>O<sub>2</sub>S<sub>2</sub>

Molecular Weight: 374.48042

ALogP: 3.541

Rotatable Bonds: 3

Acceptors: 5

Donors: 2

**Model Prediction**

Prediction: Single-Carcinogen

Probability: 0.312

Enrichment: 0.834

Bayesian Score: -4.89

Mahalanobis Distance: 13

Mahalanobis Distance p-value: 0.000225

Prediction: Positive if the Bayesian score is above the estimated best cutoff value from minimizing the false positive and false negative rate.

Probability: The estimated probability that the sample is in the positive category. This assumes that the Bayesian score follows a normal distribution and is different from the prediction using a cutoff.

Enrichment: An estimate of enrichment, that is, the increased likelihood (versus random) of this sample being in the category.

Bayesian Score: The standard Laplacian-modified Bayesian score.

Mahalanobis Distance: The Mahalanobis distance (MD) is the distance to the center of the training data. The larger the MD, the less trustworthy the prediction.

Mahalanobis Distance p-value: The p-value gives the fraction of training data with an MD greater than or equal to the one for the given sample, assuming normally distributed data. The smaller the p-value, the less trustworthy the prediction. For highly non-normal X properties (e.g., fingerprints), the MD p-value is wildly inaccurate.

**Structural Similar Compounds**

| Name               | Torsemide                                                           | Estrogens; conjug.                                                  | Sulfamethazine                                                      |
|--------------------|---------------------------------------------------------------------|---------------------------------------------------------------------|---------------------------------------------------------------------|
| Structure          |                                                                     |                                                                     |                                                                     |
| Actual Endpoint    | Single-Carcinogen                                                   | Single-Carcinogen                                                   | Single-Carcinogen                                                   |
| Predicted Endpoint | Single-Carcinogen                                                   | Single-Carcinogen                                                   | Single-Carcinogen                                                   |
| Distance           | 0.631                                                               | 0.646                                                               | 0.668                                                               |
| Reference          | US FDA (Centre for Drug Eval.& Res./Off. Testing & Res.) Sept. 1997 | US FDA (Centre for Drug Eval.& Res./Off. Testing & Res.) Sept. 1997 | US FDA (Centre for Drug Eval.& Res./Off. Testing & Res.) Sept. 1997 |

**Model Applicability**

Unknown features are fingerprint features in the query molecule, but not found or appearing too infrequently in the training set.

1. All properties and OPS components are within expected ranges.

**Feature Contribution****Top features for positive contribution**

| Fingerprint | Bit/Smiles  | Feature Structure                                                  | Score | Multiple-Carcinogen in training set |
|-------------|-------------|--------------------------------------------------------------------|-------|-------------------------------------|
| SCFP_4      | -1065373877 | <p>AND Enantiomer</p> <p>[*][c]1:[*]:[c](:[*])<br/>:n:[cH]:n:1</p> | 0.721 | 3 out of 3                          |

|                                               |                   |                                                                                                                                                               |              |                                            |
|-----------------------------------------------|-------------------|---------------------------------------------------------------------------------------------------------------------------------------------------------------|--------------|--------------------------------------------|
| SCFP_4                                        | -1181430618       | <p>AND Enantiomer</p> 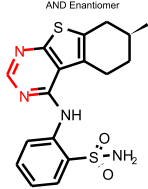 <p>[*]:n:[cH]:n:[*]</p>                             | 0.663        | 4 out of 5                                 |
| SCFP_4                                        | 17                | <p>AND Enantiomer</p>  <p>[*]:s:[*]</p>                                    | 0.548        | 10 out of 17                               |
| <b>Top Features for negative contribution</b> |                   |                                                                                                                                                               |              |                                            |
| <b>Fingerprint</b>                            | <b>Bit/Smiles</b> | <b>Feature Structure</b>                                                                                                                                      | <b>Score</b> | <b>Multiple-Carcinogen in training set</b> |
| SCFP_4                                        | -1272709286       | <p>AND Enantiomer</p>  <p>[*]C[*]C[*]C[*]:[*]:[*]</p>                      | -1.16        | 1 out of 17                                |
| SCFP_4                                        | 112346096         | <p>AND Enantiomer</p>  <p>[*][c]:[*]:[c]1:[c]([*]):[*]:[*]:[c]:1:[*]</p> | -0.73        | 1 out of 10                                |
| SCFP_4                                        | -1849867720       | <p>AND Enantiomer</p>  <p>[*]C@@H1[*]c2:[*]:[*]c([*])c:2CC1</p>          | -0.73        | 1 out of 10                                |



9b

TOPKAT\_Rat\_Female\_FDA\_Single\_vs\_Multiple

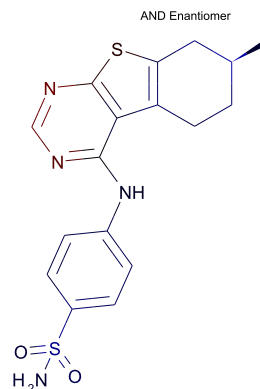C<sub>17</sub>H<sub>18</sub>N<sub>4</sub>O<sub>2</sub>S<sub>2</sub>

Molecular Weight: 374.48042

ALogP: 3.541

Rotatable Bonds: 3

Acceptors: 5

Donors: 2

**Model Prediction**

Prediction: Single-Carcinogen

Probability: 0.305

Enrichment: 0.816

Bayesian Score: -5.01

Mahalanobis Distance: 11.6

Mahalanobis Distance p-value: 0.00379

Prediction: Positive if the Bayesian score is above the estimated best cutoff value from minimizing the false positive and false negative rate.

Probability: The estimated probability that the sample is in the positive category. This assumes that the Bayesian score follows a normal distribution and is different from the prediction using a cutoff.

Enrichment: An estimate of enrichment, that is, the increased likelihood (versus random) of this sample being in the category.

Bayesian Score: The standard Laplacian-modified Bayesian score.

Mahalanobis Distance: The Mahalanobis distance (MD) is the distance to the center of the training data. The larger the MD, the less trustworthy the prediction.

Mahalanobis Distance p-value: The p-value gives the fraction of training data with an MD greater than or equal to the one for the given sample, assuming normally distributed data. The smaller the p-value, the less trustworthy the prediction. For highly non-normal X properties (e.g., fingerprints), the MD p-value is wildly inaccurate.

**Structural Similar Compounds**

| Name               | Estrogens; conjug.                                                  | Torsemide                                                           | Sulfamethazine                                                      |
|--------------------|---------------------------------------------------------------------|---------------------------------------------------------------------|---------------------------------------------------------------------|
| Structure          |                                                                     |                                                                     |                                                                     |
| Actual Endpoint    | Single-Carcinogen                                                   | Single-Carcinogen                                                   | Single-Carcinogen                                                   |
| Predicted Endpoint | Single-Carcinogen                                                   | Single-Carcinogen                                                   | Single-Carcinogen                                                   |
| Distance           | 0.644                                                               | 0.649                                                               | 0.655                                                               |
| Reference          | US FDA (Centre for Drug Eval.& Res./Off. Testing & Res.) Sept. 1997 | US FDA (Centre for Drug Eval.& Res./Off. Testing & Res.) Sept. 1997 | US FDA (Centre for Drug Eval.& Res./Off. Testing & Res.) Sept. 1997 |

**Model Applicability**

Unknown features are fingerprint features in the query molecule, but not found or appearing too infrequently in the training set.

1. All properties and OPS components are within expected ranges.

**Feature Contribution****Top features for positive contribution**

| Fingerprint | Bit/Smiles  | Feature Structure | Score | Multiple-Carcinogen in training set |
|-------------|-------------|-------------------|-------|-------------------------------------|
| SCFP_4      | -1065373877 |                   | 0.721 | 3 out of 3                          |

|                                               |                   |                                                                                                                                                                   |              |                                            |
|-----------------------------------------------|-------------------|-------------------------------------------------------------------------------------------------------------------------------------------------------------------|--------------|--------------------------------------------|
| SCFP_4                                        | -1181430618       | <p>AND Enantiomer</p> 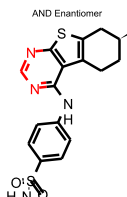 <p>[*]:n:[cH]:n:[*]</p>                                  | 0.663        | 4 out of 5                                 |
| SCFP_4                                        | 17                | <p>AND Enantiomer</p>  <p>[*]:s:[*]</p>                                        | 0.548        | 10 out of 17                               |
| <b>Top Features for negative contribution</b> |                   |                                                                                                                                                                   |              |                                            |
| <b>Fingerprint</b>                            | <b>Bit/Smiles</b> | <b>Feature Structure</b>                                                                                                                                          | <b>Score</b> | <b>Multiple-Carcinogen in training set</b> |
| SCFP_4                                        | -1272709286       | <p>AND Enantiomer</p>  <p>[*]C([*])C[c](-[*]):[*]</p>                          | -1.16        | 1 out of 17                                |
| SCFP_4                                        | -1849867720       | <p>AND Enantiomer</p>  <p>[*]C@@H1[*]c2:1<br/>:1]:e(c[*]):c:2<br/>CC1</p>     | -0.73        | 1 out of 10                                |
| SCFP_4                                        | 112346096         | <p>AND Enantiomer</p>  <p>[*]c([*])c1:[c]<br/>([*]):[*]:[*]:c:1:<br/>[*]</p> | -0.73        | 1 out of 10                                |





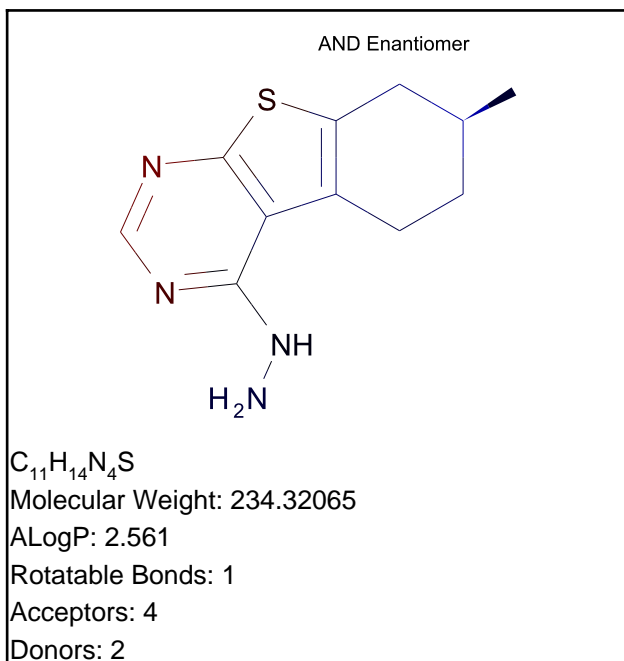

### Model Prediction

Prediction: Single-Carcinogen

Probability: 0.427

Enrichment: 1.14

Bayesian Score: -2.54

Mahalanobis Distance: 13.4

Mahalanobis Distance p-value: 0.000104

Prediction: Positive if the Bayesian score is above the estimated best cutoff value from minimizing the false positive and false negative rate.

Probability: The estimated probability that the sample is in the positive category. This assumes that the Bayesian score follows a normal distribution and is different from the prediction using a cutoff.

Enrichment: An estimate of enrichment, that is, the increased likelihood (versus random) of this sample being in the category.

Bayesian Score: The standard Laplacian-modified Bayesian score.

Mahalanobis Distance: The Mahalanobis distance (MD) is the distance to the center of the training data. The larger the MD, the less trustworthy the prediction.

Mahalanobis Distance p-value: The p-value gives the fraction of training data with an MD greater than or equal to the one for the given sample, assuming normally distributed data. The smaller the p-value, the less trustworthy the prediction. For highly non-normal X properties (e.g., fingerprints), the MD p-value is wildly inaccurate.

### Structural Similar Compounds

| Name               | Propylthiouracil                                                                    | Phenazopyridine                                                                     | Hydralazine                                                                         |
|--------------------|-------------------------------------------------------------------------------------|-------------------------------------------------------------------------------------|-------------------------------------------------------------------------------------|
| Structure          | 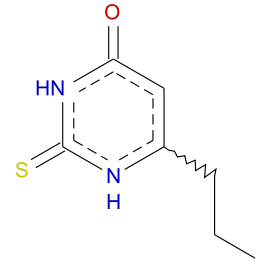 |  |  |
| Actual Endpoint    | Single-Carcinogen                                                                   | Single-Carcinogen                                                                   | Single-Carcinogen                                                                   |
| Predicted Endpoint | Single-Carcinogen                                                                   | Single-Carcinogen                                                                   | Single-Carcinogen                                                                   |
| Distance           | 0.560                                                                               | 0.570                                                                               | 0.595                                                                               |
| Reference          | US FDA (Centre for Drug Eval.& Res./Off. Testing & Res.) Sept. 1997                 | US FDA (Centre for Drug Eval.& Res./Off. Testing & Res.) Sept. 1997                 | US FDA (Centre for Drug Eval.& Res./Off. Testing & Res.) Sept. 1997                 |

### Model Applicability

Unknown features are fingerprint features in the query molecule, but not found or appearing too infrequently in the training set.

1. All properties and OPS components are within expected ranges.

### Feature Contribution

#### Top features for positive contribution

| Fingerprint | Bit/Smiles  | Feature Structure                                                                                                                                                                                               | Score | Multiple-Carcinogen in training set |
|-------------|-------------|-----------------------------------------------------------------------------------------------------------------------------------------------------------------------------------------------------------------|-------|-------------------------------------|
| SCFP_4      | -1065373877 | <p style="text-align: center;">AND Enantiomer</p> 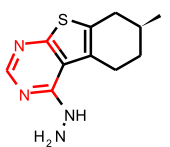 <p style="text-align: center;">[*][c]1:[*]:[c]([*])<br/>:n:[cH]:n:1</p> | 0.721 | 3 out of 3                          |

|                                               |                   |                                                                                                                                                        |              |                                            |
|-----------------------------------------------|-------------------|--------------------------------------------------------------------------------------------------------------------------------------------------------|--------------|--------------------------------------------|
| SCFP_4                                        | -1181430618       | <p>AND Enantiomer</p> 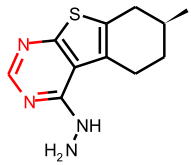 <p>[*]:n:[cH]:n:[*]</p>                      | 0.663        | 4 out of 5                                 |
| SCFP_4                                        | 17                | <p>AND Enantiomer</p>  <p>[*]:s:[*]</p>                             | 0.548        | 10 out of 17                               |
| <b>Top Features for negative contribution</b> |                   |                                                                                                                                                        |              |                                            |
| <b>Fingerprint</b>                            | <b>Bit/Smiles</b> | <b>Feature Structure</b>                                                                                                                               | <b>Score</b> | <b>Multiple-Carcinogen in training set</b> |
| SCFP_4                                        | -1272709286       | <p>AND Enantiomer</p>  <p>[*]C([*])C[c](-[*]):[*]</p>               | -1.16        | 1 out of 17                                |
| SCFP_4                                        | -1849867720       | <p>AND Enantiomer</p>  <p>[*]C@@H1[*]c2[*]:[*]e(c[*]):c2CC1</p>   | -0.73        | 1 out of 10                                |
| SCFP_4                                        | 112346096         | <p>AND Enantiomer</p>  <p>[*]c(-[*]):c1:c([*]):[*]:[*]:c1:[*]</p> | -0.73        | 1 out of 10                                |



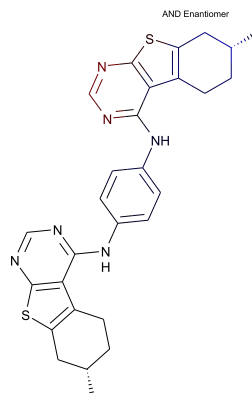

$C_{28}H_{28}N_6S_2$

Molecular Weight: 512.69212

ALogP: 7.842

Rotatable Bonds: 4

Acceptors: 6

Donors: 2

## Model Prediction

Prediction: Single-Carcinogen

Probability: 0.387

Enrichment: 1.04

Bayesian Score: -3.43

Mahalanobis Distance: 11.9

Mahalanobis Distance p-value: 0.00213

Prediction: Positive if the Bayesian score is above the estimated best cutoff value from minimizing the false positive and false negative rate.

Probability: The estimated probability that the sample is in the positive category. This assumes that the Bayesian score follows a normal distribution and is different from the prediction using a cutoff.

Enrichment: An estimate of enrichment, that is, the increased likelihood (versus random) of this sample being in the category.

Bayesian Score: The standard Laplacian-modified Bayesian score.

Mahalanobis Distance: The Mahalanobis distance (MD) is the distance to the center of the training data. The larger the MD, the less trustworthy the prediction.

Mahalanobis Distance p-value: The p-value gives the fraction of training data with an MD greater than or equal to the one for the given sample, assuming normally distributed data. The smaller the p-value, the less trustworthy the prediction. For highly non-normal X properties (e.g., fingerprints), the MD p-value is wildly inaccurate.

## Structural Similar Compounds

| Name               | Bromocriptine                                                       | Deserpidine                                                         | Simvastatin                                                         |
|--------------------|---------------------------------------------------------------------|---------------------------------------------------------------------|---------------------------------------------------------------------|
| Structure          |                                                                     |                                                                     |                                                                     |
| Actual Endpoint    | Single-Carcinogen                                                   | Single-Carcinogen                                                   | Multiple-Carcinogen                                                 |
| Predicted Endpoint | Single-Carcinogen                                                   | Single-Carcinogen                                                   | Multiple-Carcinogen                                                 |
| Distance           | 0.893                                                               | 0.903                                                               | 0.922                                                               |
| Reference          | US FDA (Centre for Drug Eval.& Res./Off. Testing & Res.) Sept. 1997 | US FDA (Centre for Drug Eval.& Res./Off. Testing & Res.) Sept. 1997 | US FDA (Centre for Drug Eval.& Res./Off. Testing & Res.) Sept. 1997 |

## Model Applicability

Unknown features are fingerprint features in the query molecule, but not found or appearing too infrequently in the training set.

1. All properties and OPS components are within expected ranges.

## Feature Contribution

### Top features for positive contribution

| Fingerprint | Bit/Smiles  | Feature Structure                                  | Score | Multiple-Carcinogen in training set |
|-------------|-------------|----------------------------------------------------|-------|-------------------------------------|
| SCFP_4      | -1065373877 | <br><chem>[*][c]1:[*]:[c](:[*]) :n:[cH]:n:1</chem> | 0.721 | 3 out of 3                          |

|                                               |                   |                                                                                                                                                               |              |                                            |
|-----------------------------------------------|-------------------|---------------------------------------------------------------------------------------------------------------------------------------------------------------|--------------|--------------------------------------------|
| SCFP_4                                        | -1181430618       | <p>AND Enantiomer</p> 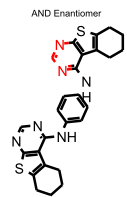 <p>[*]:n:[cH]:n:[*]</p>                              | 0.663        | 4 out of 5                                 |
| SCFP_4                                        | 17                | <p>AND Enantiomer</p>  <p>[*]:s:[*]</p>                                    | 0.548        | 10 out of 17                               |
| <b>Top Features for negative contribution</b> |                   |                                                                                                                                                               |              |                                            |
| <b>Fingerprint</b>                            | <b>Bit/Smiles</b> | <b>Feature Structure</b>                                                                                                                                      | <b>Score</b> | <b>Multiple-Carcinogen in training set</b> |
| SCFP_4                                        | -1272709286       | <p>AND Enantiomer</p>  <p>[*]C[*]C[c](-[*]):[*]</p>                        | -1.16        | 1 out of 17                                |
| SCFP_4                                        | 112346096         | <p>AND Enantiomer</p>  <p>[*][c](-[*])[c]1:[c]([*])-[*]:[*]:[c]:1:[*]</p> | -0.73        | 1 out of 10                                |
| SCFP_4                                        | -1849867720       | <p>AND Enantiomer</p>  <p>[*]C@@H1[*]c2:[*]:[*]c([*])c2CC1</p>           | -0.73        | 1 out of 10                                |



# Erlotinib

# TOPKAT\_Rat\_Female\_FDA\_Single\_vs\_Multiple

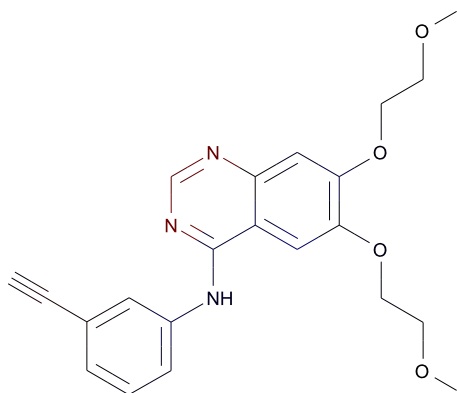

$C_{22}H_{23}N_3O_4$

Molecular Weight: 393.43572

ALogP: 4.309

Rotatable Bonds: 10

Acceptors: 7

Donors: 1

## Model Prediction

Prediction: Single-Carcinogen

Probability: 0.423

Enrichment: 1.13

Bayesian Score: -2.63

Mahalanobis Distance: 15.2

Mahalanobis Distance p-value: 2.08e-006

Prediction: Positive if the Bayesian score is above the estimated best cutoff value from minimizing the false positive and false negative rate.

Probability: The estimated probability that the sample is in the positive category. This assumes that the Bayesian score follows a normal distribution and is different from the prediction using a cutoff.

Enrichment: An estimate of enrichment, that is, the increased likelihood (versus random) of this sample being in the category.

Bayesian Score: The standard Laplacian-modified Bayesian score.

Mahalanobis Distance: The Mahalanobis distance (MD) is the distance to the center of the training data. The larger the MD, the less trustworthy the prediction.

Mahalanobis Distance p-value: The p-value gives the fraction of training data with an MD greater than or equal to the one for the given sample, assuming normally distributed data. The smaller the p-value, the less trustworthy the prediction. For highly non-normal X properties (e.g., fingerprints), the MD p-value is wildly inaccurate.

## Structural Similar Compounds

| Name               | Nicardipine                                                                         | Diltiazem                                                                           | Moricizine                                                                          |
|--------------------|-------------------------------------------------------------------------------------|-------------------------------------------------------------------------------------|-------------------------------------------------------------------------------------|
| Structure          | 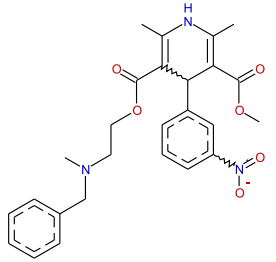 |  |  |
| Actual Endpoint    | Single-Carcinogen                                                                   | Multiple-Carcinogen                                                                 | Single-Carcinogen                                                                   |
| Predicted Endpoint | Single-Carcinogen                                                                   | Multiple-Carcinogen                                                                 | Single-Carcinogen                                                                   |
| Distance           | 0.632                                                                               | 0.748                                                                               | 0.749                                                                               |
| Reference          | US FDA (Centre for Drug Eval.& Res./Off. Testing & Res.) Sept. 1997                 | US FDA (Centre for Drug Eval.& Res./Off. Testing & Res.) Sept. 1997                 | US FDA (Centre for Drug Eval.& Res./Off. Testing & Res.) Sept. 1997                 |

## Model Applicability

Unknown features are fingerprint features in the query molecule, but not found or appearing too infrequently in the training set.

1. All properties and OPS components are within expected ranges.

## Feature Contribution

### Top features for positive contribution

| Fingerprint | Bit/Smiles  | Feature Structure                                                                                                             | Score | Multiple-Carcinogen in training set |
|-------------|-------------|-------------------------------------------------------------------------------------------------------------------------------|-------|-------------------------------------|
| SCFP_4      | -1065373877 | 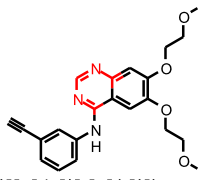<br>[*][c]1:[*]:[c](:[*])<br>:n:[cH]:n:1 | 0.721 | 3 out of 3                          |



|                                               |                   |                                                                                                                                               |              |                                            |
|-----------------------------------------------|-------------------|-----------------------------------------------------------------------------------------------------------------------------------------------|--------------|--------------------------------------------|
| SCFP_4                                        | -1181430618       | 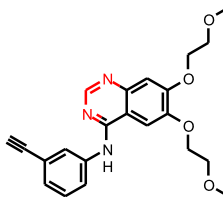<br>[*]:n:[cH]:n:[*]                                        | 0.663        | 4 out of 5                                 |
| SCFP_4                                        | 2142015375        | <br>[*]:[cH]:[c]1:n:[cH]:n:[*]:[c]:1:[*]                   | 0.433        | 2 out of 3                                 |
| <b>Top Features for negative contribution</b> |                   |                                                                                                                                               |              |                                            |
| <b>Fingerprint</b>                            | <b>Bit/Smiles</b> | <b>Feature Structure</b>                                                                                                                      | <b>Score</b> | <b>Multiple-Carcinogen in training set</b> |
| SCFP_4                                        | 622342378         | <br>[*][c]1:[*]:[cH]:[c]2:[c]([*]):[*]:[cH]:n:[c]:2:[cH]:1 | -0.816       | 0 out of 4                                 |
| SCFP_4                                        | 112346096         | <br>[*][c]([*]):[c]1:[c]([*]):[*]:[*]:[c]:1:[*]          | -0.73        | 1 out of 10                                |
| SCFP_4                                        | 1242547645        | <br>[*]CO[c]1:[cH]:[c]([*]):[*]:[cH]:[c]:1O[*]           | -0.489       | 0 out of 2                                 |



5a

TOPKAT\_Rat\_Male\_FDA\_None\_vs\_Carcinogen

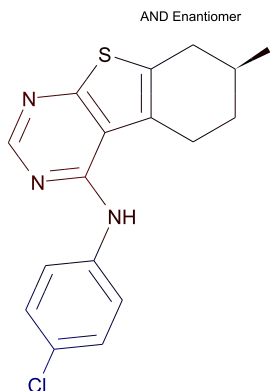C<sub>17</sub>H<sub>16</sub>ClN<sub>3</sub>S

Molecular Weight: 329.84704

ALogP: 5.5

Rotatable Bonds: 2

Acceptors: 3

Donors: 1

**Model Prediction****Prediction: Carcinogen**

Probability: 0.373

Enrichment: 1.11

Bayesian Score: 0.553

Mahalanobis Distance: 17.3

Mahalanobis Distance p-value: 5.48e-012

Prediction: Positive if the Bayesian score is above the estimated best cutoff value from minimizing the false positive and false negative rate.

Probability: The estimated probability that the sample is in the positive category. This assumes that the Bayesian score follows a normal distribution and is different from the prediction using a cutoff.

Enrichment: An estimate of enrichment, that is, the increased likelihood (versus random) of this sample being in the category.

Bayesian Score: The standard Laplacian-modified Bayesian score.

Mahalanobis Distance: The Mahalanobis distance (MD) is the distance to the center of the training data. The larger the MD, the less trustworthy the prediction.

Mahalanobis Distance p-value: The p-value gives the fraction of training data with an MD greater than or equal to the one for the given sample, assuming normally distributed data. The smaller the p-value, the less trustworthy the prediction. For highly non-normal X properties (e.g., fingerprints), the MD p-value is wildly inaccurate.

**Structural Similar Compounds**

| Name               | Meclofenamate                                                       | Nafenopin                                                           | Indomethacin                                                        |
|--------------------|---------------------------------------------------------------------|---------------------------------------------------------------------|---------------------------------------------------------------------|
| Structure          |                                                                     |                                                                     |                                                                     |
| Actual Endpoint    | Non-Carcinogen                                                      | Carcinogen                                                          | Non-Carcinogen                                                      |
| Predicted Endpoint | Non-Carcinogen                                                      | Carcinogen                                                          | Non-Carcinogen                                                      |
| Distance           | 0.614                                                               | 0.623                                                               | 0.641                                                               |
| Reference          | US FDA (Centre for Drug Eval.& Res./Off. Testing & Res.) Sept. 1997 | US FDA (Centre for Drug Eval.& Res./Off. Testing & Res.) Sept. 1997 | US FDA (Centre for Drug Eval.& Res./Off. Testing & Res.) Sept. 1997 |

**Model Applicability**

Unknown features are fingerprint features in the query molecule, but not found or appearing too infrequently in the training set.

1. All properties and OPS components are within expected ranges.

**Feature Contribution****Top features for positive contribution**

| Fingerprint | Bit/Smiles | Feature Structure                             | Score | Carcinogen in training set |
|-------------|------------|-----------------------------------------------|-------|----------------------------|
| SCFP_6      | 1310748454 | <br><chem>[*][c]1:[*]:[*]:[c]([*]):s:1</chem> | 0.437 | 7 out of 13                |

|                                               |                   |                                                                                                                                                         |              |                                   |
|-----------------------------------------------|-------------------|---------------------------------------------------------------------------------------------------------------------------------------------------------|--------------|-----------------------------------|
| SCFP_6                                        | -55982834         | <p>AND Enantiomer</p> 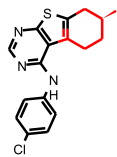 <p>[*][c]1:[*]C[C@@H](C)CC1</p>               | 0.432        | 4 out of 7                        |
| SCFP_6                                        | -1065373877       | <p>AND Enantiomer</p>  <p>[*][c]1:[*]:[c](:[*])<br/>:n:[cH]:n:1</p>  | 0.429        | 3 out of 5                        |
| <b>Top Features for negative contribution</b> |                   |                                                                                                                                                         |              |                                   |
| <b>Fingerprint</b>                            | <b>Bit/Smiles</b> | <b>Feature Structure</b>                                                                                                                                | <b>Score</b> | <b>Carcinogen in training set</b> |
| SCFP_6                                        | 341480432         | <p>AND Enantiomer</p>  <p>[*]N[c]1:[cH]:[cH]:[c](Cl):[cH]:[cH]:1</p> | -0.674       | 0 out of 3                        |
| SCFP_6                                        | 1905487031        | <p>AND Enantiomer</p>  <p>[*][c]1:[cH]:[cH]:[c](Cl):[cH]:[cH]:1</p> | -0.48        | 2 out of 12                       |
| SCFP_6                                        | -1272709286       | <p>AND Enantiomer</p>  <p>[*]C([*])C[c](:[*]):[*]</p>              | -0.459       | 12 out of 61                      |

5b

TOPKAT\_Rat\_Male\_FDA\_None\_vs\_Carcinogen

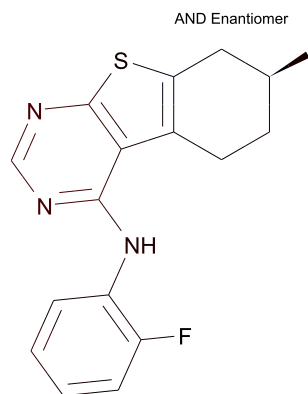

$C_{17}H_{16}FN_3S$   
 Molecular Weight: 313.39244  
 ALogP: 5.041  
 Rotatable Bonds: 2  
 Acceptors: 3  
 Donors: 1

### Model Prediction

Prediction: **Carcinogen**

Probability: 0.463

Enrichment: 1.39

Bayesian Score: 3.32

Mahalanobis Distance: 17.6

Mahalanobis Distance p-value: 1.34e-012

Prediction: Positive if the Bayesian score is above the estimated best cutoff value from minimizing the false positive and false negative rate.

Probability: The estimated probability that the sample is in the positive category. This assumes that the Bayesian score follows a normal distribution and is different from the prediction using a cutoff.

Enrichment: An estimate of enrichment, that is, the increased likelihood (versus random) of this sample being in the category.

Bayesian Score: The standard Laplacian-modified Bayesian score.

Mahalanobis Distance: The Mahalanobis distance (MD) is the distance to the center of the training data. The larger the MD, the less trustworthy the prediction.

Mahalanobis Distance p-value: The p-value gives the fraction of training data with an MD greater than or equal to the one for the given sample, assuming normally distributed data. The smaller the p-value, the less trustworthy the prediction. For highly non-normal X properties (e.g., fingerprints), the MD p-value is wildly inaccurate.

### Structural Similar Compounds

| Name               | Nafenopin                                                           | Meclofenamate                                                       | Pergolide                                                           |
|--------------------|---------------------------------------------------------------------|---------------------------------------------------------------------|---------------------------------------------------------------------|
| Structure          |                                                                     |                                                                     |                                                                     |
| Actual Endpoint    | Carcinogen                                                          | Non-Carcinogen                                                      | Non-Carcinogen                                                      |
| Predicted Endpoint | Carcinogen                                                          | Non-Carcinogen                                                      | Non-Carcinogen                                                      |
| Distance           | 0.610                                                               | 0.612                                                               | 0.643                                                               |
| Reference          | US FDA (Centre for Drug Eval.& Res./Off. Testing & Res.) Sept. 1997 | US FDA (Centre for Drug Eval.& Res./Off. Testing & Res.) Sept. 1997 | US FDA (Centre for Drug Eval.& Res./Off. Testing & Res.) Sept. 1997 |

### Model Applicability

Unknown features are fingerprint features in the query molecule, but not found or appearing too infrequently in the training set.

1. All properties and OPS components are within expected ranges.

### Feature Contribution

#### Top features for positive contribution

| Fingerprint | Bit/Smiles | Feature Structure                             | Score | Carcinogen in training set |
|-------------|------------|-----------------------------------------------|-------|----------------------------|
| SCFP_6      | 1310748454 | <br><chem>[*][c]1:[*]:[*]:[c]([*]):s:1</chem> | 0.437 | 7 out of 13                |

|                                               |                   |                                                                                                                                                                              |              |                                   |
|-----------------------------------------------|-------------------|------------------------------------------------------------------------------------------------------------------------------------------------------------------------------|--------------|-----------------------------------|
| SCFP_6                                        | -55982834         | <p>AND Enantiomer</p> 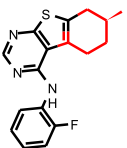 <p>[*]:[c]1:[*]C[C@@H](C)CC1</p>                                   | 0.432        | 4 out of 7                        |
| SCFP_6                                        | -1065373877       | <p>AND Enantiomer</p>  <p>[*][c]1:[*]:[c](:[*])<br/>:n:[cH]:n:1</p>                       | 0.429        | 3 out of 5                        |
| <b>Top Features for negative contribution</b> |                   |                                                                                                                                                                              |              |                                   |
| <b>Fingerprint</b>                            | <b>Bit/Smiles</b> | <b>Feature Structure</b>                                                                                                                                                     | <b>Score</b> | <b>Carcinogen in training set</b> |
| SCFP_6                                        | -1551011249       | <p>AND Enantiomer</p>  <p>[*]N[c]1:[cH]:[*]:[cH]<br/>]:[cH]:[c]:1F</p>                    | -0.674       | 0 out of 3                        |
| SCFP_6                                        | -1272709286       | <p>AND Enantiomer</p>  <p>[*]C([*])C[c](:[*]):[*]</p>                                    | -0.459       | 12 out of 61                      |
| SCFP_6                                        | 815479470         | <p>AND Enantiomer</p>  <p>[*][C@H]1[*]C[c]2:[c]<br/>(C1):s:[c](:[*]):[c]<br/>:2:[*]</p> | -0.278       | 0 out of 1                        |

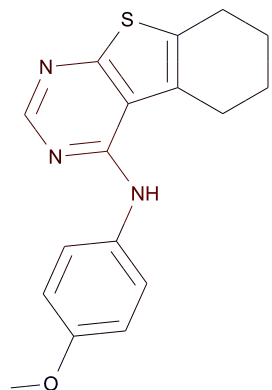

$C_{17}H_{17}N_3OS$

Molecular Weight: 311.40138

ALogP: 4.568

Rotatable Bonds: 3

Acceptors: 4

Donors: 1

## Model Prediction

**Prediction: Carcinogen**

Probability: 0.454

Enrichment: 1.36

Bayesian Score: 3.05

Mahalanobis Distance: 17.5

Mahalanobis Distance p-value: 1.5e-012

Prediction: Positive if the Bayesian score is above the estimated best cutoff value from minimizing the false positive and false negative rate.

Probability: The estimated probability that the sample is in the positive category. This assumes that the Bayesian score follows a normal distribution and is different from the prediction using a cutoff.

Enrichment: An estimate of enrichment, that is, the increased likelihood (versus random) of this sample being in the category.

Bayesian Score: The standard Laplacian-modified Bayesian score.

Mahalanobis Distance: The Mahalanobis distance (MD) is the distance to the center of the training data. The larger the MD, the less trustworthy the prediction.

Mahalanobis Distance p-value: The p-value gives the fraction of training data with an MD greater than or equal to the one for the given sample, assuming normally distributed data. The smaller the p-value, the less trustworthy the prediction. For highly non-normal X properties (e.g., fingerprints), the MD p-value is wildly inaccurate.

## Structural Similar Compounds

| Name               | Indomethacin                                                        | Nafenopin                                                           | Estrogens; conjug.                                                  |
|--------------------|---------------------------------------------------------------------|---------------------------------------------------------------------|---------------------------------------------------------------------|
| Structure          |                                                                     |                                                                     |                                                                     |
| Actual Endpoint    | Non-Carcinogen                                                      | Carcinogen                                                          | Non-Carcinogen                                                      |
| Predicted Endpoint | Non-Carcinogen                                                      | Carcinogen                                                          | Non-Carcinogen                                                      |
| Distance           | 0.561                                                               | 0.600                                                               | 0.618                                                               |
| Reference          | US FDA (Centre for Drug Eval.& Res./Off. Testing & Res.) Sept. 1997 | US FDA (Centre for Drug Eval.& Res./Off. Testing & Res.) Sept. 1997 | US FDA (Centre for Drug Eval.& Res./Off. Testing & Res.) Sept. 1997 |

## Model Applicability

Unknown features are fingerprint features in the query molecule, but not found or appearing too infrequently in the training set.

1. All properties and OPS components are within expected ranges.

## Feature Contribution

### Top features for positive contribution

| Fingerprint | Bit/Smiles | Feature Structure                              | Score | Carcinogen in training set |
|-------------|------------|------------------------------------------------|-------|----------------------------|
| SCFP_6      | 1310748454 | <br><chem>[*][c]1[*]:[*]:[*]:c([*]):s:1</chem> | 0.437 | 7 out of 13                |

|                                               |                   |                                                                                                                                                                |              |                                   |
|-----------------------------------------------|-------------------|----------------------------------------------------------------------------------------------------------------------------------------------------------------|--------------|-----------------------------------|
| SCFP_6                                        | 494226440         | 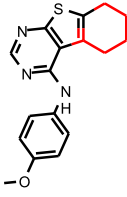<br><chem>[*]:[c]1:[*]CCCC1</chem>                                          | 0.432        | 4 out of 7                        |
| SCFP_6                                        | -1065373877       | <br><chem>[*][c]1:[*]:[c](:[*])<br/>:n:[cH]:n:1</chem>                      | 0.429        | 3 out of 5                        |
| <b>Top Features for negative contribution</b> |                   |                                                                                                                                                                |              |                                   |
| <b>Fingerprint</b>                            | <b>Bit/Smiles</b> | <b>Feature Structure</b>                                                                                                                                       | <b>Score</b> | <b>Carcinogen in training set</b> |
| SCFP_6                                        | -1272709286       | <br><chem>[*]C[*]C[c](:[*]):[<br/>*]</chem>                                 | -0.459       | 12 out of 61                      |
| SCFP_6                                        | 1287669168        | <br><chem>[*][c]1:[cH]:[cH]:[c]<br/>(OC):[cH]:[cH]:1</chem>                | -0.38        | 1 out of 6                        |
| SCFP_6                                        | 815479470         | <br><chem>[*][C@H]1[*]C[c]2:[c]<br/>(C1):s:[c]([*]):[c]<br/>:2:[*]</chem> | -0.278       | 0 out of 1                        |



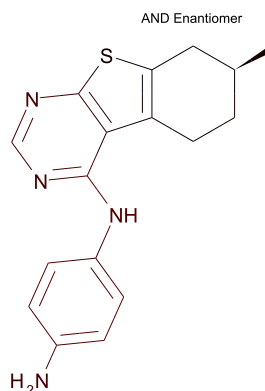

$C_{17}H_{18}N_4S$

Molecular Weight: 310.41662

ALogP: 4.089

Rotatable Bonds: 2

Acceptors: 4

Donors: 2

## Model Prediction

**Prediction: Carcinogen**

Probability: 0.497

Enrichment: 1.49

Bayesian Score: 4.26

Mahalanobis Distance: 16

Mahalanobis Distance p-value: 4.48e-009

Prediction: Positive if the Bayesian score is above the estimated best cutoff value from minimizing the false positive and false negative rate.

Probability: The estimated probability that the sample is in the positive category. This assumes that the Bayesian score follows a normal distribution and is different from the prediction using a cutoff.

Enrichment: An estimate of enrichment, that is, the increased likelihood (versus random) of this sample being in the category.

Bayesian Score: The standard Laplacian-modified Bayesian score.

Mahalanobis Distance: The Mahalanobis distance (MD) is the distance to the center of the training data. The larger the MD, the less trustworthy the prediction.

Mahalanobis Distance p-value: The p-value gives the fraction of training data with an MD greater than or equal to the one for the given sample, assuming normally distributed data. The smaller the p-value, the less trustworthy the prediction. For highly non-normal X properties (e.g., fingerprints), the MD p-value is wildly inaccurate.

## Structural Similar Compounds

| Name               | Niclosamide                                                         | Phenolphthalein                                                     | Pyrimethamine                                                       |
|--------------------|---------------------------------------------------------------------|---------------------------------------------------------------------|---------------------------------------------------------------------|
| Structure          |                                                                     |                                                                     |                                                                     |
| Actual Endpoint    | Non-Carcinogen                                                      | Carcinogen                                                          | Non-Carcinogen                                                      |
| Predicted Endpoint | Non-Carcinogen                                                      | Carcinogen                                                          | Non-Carcinogen                                                      |
| Distance           | 0.561                                                               | 0.573                                                               | 0.606                                                               |
| Reference          | US FDA (Centre for Drug Eval.& Res./Off. Testing & Res.) Sept. 1997 | US FDA (Centre for Drug Eval.& Res./Off. Testing & Res.) Sept. 1997 | US FDA (Centre for Drug Eval.& Res./Off. Testing & Res.) Sept. 1997 |

## Model Applicability

Unknown features are fingerprint features in the query molecule, but not found or appearing too infrequently in the training set.

1. All properties and OPS components are within expected ranges.

## Feature Contribution

### Top features for positive contribution

| Fingerprint | Bit/Smiles | Feature Structure                                      | Score | Carcinogen in training set |
|-------------|------------|--------------------------------------------------------|-------|----------------------------|
| SCFP_6      | 1181470699 | <br><chem>[*][c]1:[cH]:[cH]:[c]:(N):[cH]:[cH]:1</chem> | 0.536 | 4 out of 6                 |

|                                               |                   |                                                                                                                                                                                |              |                                   |
|-----------------------------------------------|-------------------|--------------------------------------------------------------------------------------------------------------------------------------------------------------------------------|--------------|-----------------------------------|
| SCFP_6                                        | -192131231        | <p>AND Enantiomer</p> 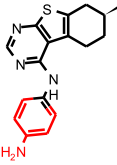 <p><chem>N[C]1:[cH]:[cH]:[*]:[cH]:[cH]:1</chem></p>                  | 0.52         | 5 out of 8                        |
| SCFP_6                                        | 1310748454        | <p>AND Enantiomer</p>  <p><chem>[*][c]1:[*]:[*]:[c](:[*]):s:1</chem></p>                    | 0.437        | 7 out of 13                       |
| <b>Top Features for negative contribution</b> |                   |                                                                                                                                                                                |              |                                   |
| <b>Fingerprint</b>                            | <b>Bit/Smiles</b> | <b>Feature Structure</b>                                                                                                                                                       | <b>Score</b> | <b>Carcinogen in training set</b> |
| SCFP_6                                        | -1272709286       | <p>AND Enantiomer</p>  <p><chem>[*]C([*])C[c](:[*]):[*]</chem></p>                          | -0.459       | 12 out of 61                      |
| SCFP_6                                        | 815479470         | <p>AND Enantiomer</p>  <p><chem>[*][C@H]1[*]C[c]2:[c](C1):s:[c](:[*]):[c]:2:[*]</chem></p> | -0.278       | 0 out of 1                        |
| SCFP_6                                        | 2109165795        | <p>AND Enantiomer</p>  <p><chem>[*]C[c]1:[c]([*]):[*]:[*]:[c]:1:[*]</chem></p>            | -0.226       | 42 out of 165                     |

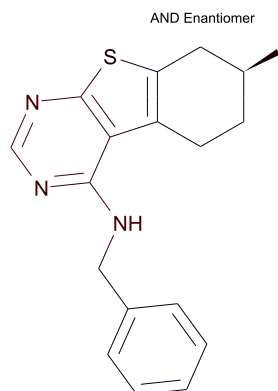

$C_{18}H_{19}N_3S$

Molecular Weight: 309.42856

ALogP: 4.678

Rotatable Bonds: 3

Acceptors: 3

Donors: 1

## Model Prediction

**Prediction: Carcinogen**

Probability: 0.438

Enrichment: 1.31

Bayesian Score: 2.59

Mahalanobis Distance: 16.2

Mahalanobis Distance p-value: 2.02e-009

Prediction: Positive if the Bayesian score is above the estimated best cutoff value from minimizing the false positive and false negative rate.

Probability: The estimated probability that the sample is in the positive category. This assumes that the Bayesian score follows a normal distribution and is different from the prediction using a cutoff.

Enrichment: An estimate of enrichment, that is, the increased likelihood (versus random) of this sample being in the category.

Bayesian Score: The standard Laplacian-modified Bayesian score.

Mahalanobis Distance: The Mahalanobis distance (MD) is the distance to the center of the training data. The larger the MD, the less trustworthy the prediction.

Mahalanobis Distance p-value: The p-value gives the fraction of training data with an MD greater than or equal to the one for the given sample, assuming normally distributed data. The smaller the p-value, the less trustworthy the prediction. For highly non-normal X properties (e.g., fingerprints), the MD p-value is wildly inaccurate.

## Structural Similar Compounds

| Name               | Nafenopin                                                           | Pergolide                                                           | Meclofenamate                                                       |
|--------------------|---------------------------------------------------------------------|---------------------------------------------------------------------|---------------------------------------------------------------------|
| Structure          |                                                                     |                                                                     |                                                                     |
| Actual Endpoint    | Carcinogen                                                          | Non-Carcinogen                                                      | Non-Carcinogen                                                      |
| Predicted Endpoint | Carcinogen                                                          | Non-Carcinogen                                                      | Non-Carcinogen                                                      |
| Distance           | 0.550                                                               | 0.587                                                               | 0.612                                                               |
| Reference          | US FDA (Centre for Drug Eval.& Res./Off. Testing & Res.) Sept. 1997 | US FDA (Centre for Drug Eval.& Res./Off. Testing & Res.) Sept. 1997 | US FDA (Centre for Drug Eval.& Res./Off. Testing & Res.) Sept. 1997 |

## Model Applicability

Unknown features are fingerprint features in the query molecule, but not found or appearing too infrequently in the training set.

1. All properties and OPS components are within expected ranges.

## Feature Contribution

### Top features for positive contribution

| Fingerprint | Bit/Smiles | Feature Structure                             | Score | Carcinogen in training set |
|-------------|------------|-----------------------------------------------|-------|----------------------------|
| SCFP_6      | 1310748454 | <br><chem>[*][c]1:[*]:[*]:[c]([*]):s:1</chem> | 0.437 | 7 out of 13                |

|                                               |                   |                                                                                                                                                           |              |                                   |
|-----------------------------------------------|-------------------|-----------------------------------------------------------------------------------------------------------------------------------------------------------|--------------|-----------------------------------|
| SCFP_6                                        | -55982834         | <p>AND Enantiomer</p> 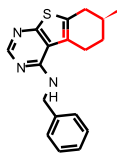 <p>[*][c]1:[*]C[C@@H](C)CC1</p>                 | 0.432        | 4 out of 7                        |
| SCFP_6                                        | -1065373877       | <p>AND Enantiomer</p>  <p>[*][c]1:[*]:[c](:[*])<br/>:n:[cH]:n:1</p>    | 0.429        | 3 out of 5                        |
| <b>Top Features for negative contribution</b> |                   |                                                                                                                                                           |              |                                   |
| <b>Fingerprint</b>                            | <b>Bit/Smiles</b> | <b>Feature Structure</b>                                                                                                                                  | <b>Score</b> | <b>Carcinogen in training set</b> |
| SCFP_6                                        | 18117904          | <p>AND Enantiomer</p>  <p>[*]CN[c](:[*]):[*]</p>                       | -0.578       | 1 out of 8                        |
| SCFP_6                                        | 1653911926        | <p>AND Enantiomer</p>  <p>[*][c]1:[cH]:[cH]:[cH]<br/>:[cH]:[cH]:1</p> | -0.504       | 12 out of 64                      |
| SCFP_6                                        | -1272709286       | <p>AND Enantiomer</p>  <p>[*]C([*])C[c](:[*]):[*]</p>                | -0.459       | 12 out of 61                      |

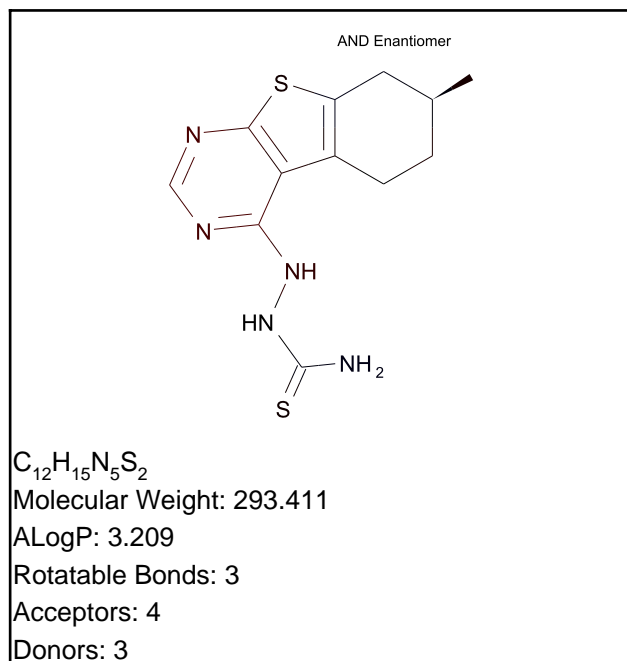

### Model Prediction

**Prediction: Carcinogen**

Probability: 0.427

Enrichment: 1.28

Bayesian Score: 2.28

Mahalanobis Distance: 16.8

Mahalanobis Distance p-value: 1.02e-010

Prediction: Positive if the Bayesian score is above the estimated best cutoff value from minimizing the false positive and false negative rate.

Probability: The estimated probability that the sample is in the positive category. This assumes that the Bayesian score follows a normal distribution and is different from the prediction using a cutoff.

Enrichment: An estimate of enrichment, that is, the increased likelihood (versus random) of this sample being in the category.

Bayesian Score: The standard Laplacian-modified Bayesian score.

Mahalanobis Distance: The Mahalanobis distance (MD) is the distance to the center of the training data. The larger the MD, the less trustworthy the prediction.

Mahalanobis Distance p-value: The p-value gives the fraction of training data with an MD greater than or equal to the one for the given sample, assuming normally distributed data. The smaller the p-value, the less trustworthy the prediction. For highly non-normal X properties (e.g., fingerprints), the MD p-value is wildly inaccurate.

### Structural Similar Compounds

| Name               | Furoseamide                                                                         | Phenazopyridine                                                                     | Lamotrigine                                                                         |
|--------------------|-------------------------------------------------------------------------------------|-------------------------------------------------------------------------------------|-------------------------------------------------------------------------------------|
| Structure          | 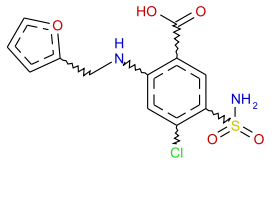 |  |  |
| Actual Endpoint    | Carcinogen                                                                          | Carcinogen                                                                          | Non-Carcinogen                                                                      |
| Predicted Endpoint | Carcinogen                                                                          | Carcinogen                                                                          | Non-Carcinogen                                                                      |
| Distance           | 0.722                                                                               | 0.722                                                                               | 0.729                                                                               |
| Reference          | US FDA (Centre for Drug Eval.& Res./Off. Testing & Res.) Sept. 1997                 | US FDA (Centre for Drug Eval.& Res./Off. Testing & Res.) Sept. 1997                 | US FDA (Centre for Drug Eval.& Res./Off. Testing & Res.) Sept. 1997                 |

### Model Applicability

Unknown features are fingerprint features in the query molecule, but not found or appearing too infrequently in the training set.

1. All properties and OPS components are within expected ranges.

### Feature Contribution

#### Top features for positive contribution

| Fingerprint | Bit/Smiles | Feature Structure                                                                                                                                                                                             | Score | Carcinogen in training set |
|-------------|------------|---------------------------------------------------------------------------------------------------------------------------------------------------------------------------------------------------------------|-------|----------------------------|
| SCFP_6      | 1310748454 | <p style="text-align: center;">AND Enantiomer</p> 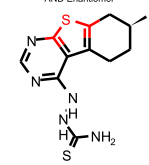 <p style="text-align: center;">[*][c]1:[*]:[*]:[c](:<br/>[*]):s:1</p> | 0.437 | 7 out of 13                |

|                                               |                   |                                                                                                                                                                    |              |                                   |
|-----------------------------------------------|-------------------|--------------------------------------------------------------------------------------------------------------------------------------------------------------------|--------------|-----------------------------------|
| SCFP_6                                        | -55982834         | <p>AND Enantiomer</p>  <p>[*]:[c]1:[*]C[C@@H](C)CC1</p>                         | 0.432        | 4 out of 7                        |
| SCFP_6                                        | -1065373877       | <p>AND Enantiomer</p>  <p>[*][c]1:[*]:[c](:[*])<br/>:n:[cH]:n:1</p>             | 0.429        | 3 out of 5                        |
| <b>Top Features for negative contribution</b> |                   |                                                                                                                                                                    |              |                                   |
| <b>Fingerprint</b>                            | <b>Bit/Smiles</b> | <b>Feature Structure</b>                                                                                                                                           | <b>Score</b> | <b>Carcinogen in training set</b> |
| SCFP_6                                        | -1272709286       | <p>AND Enantiomer</p>  <p>[*]C([*])C[c](:[*]):[*]</p>                           | -0.459       | 12 out of 61                      |
| SCFP_6                                        | 384861283         | <p>AND Enantiomer</p>  <p>[*]C(=[*])N</p>                                      | -0.38        | 1 out of 6                        |
| SCFP_6                                        | 815479470         | <p>AND Enantiomer</p>  <p>[*][C@H]1[*]C[c]2:[c](C1):s:[c](:[*]):[c]:2:[*]</p> | -0.278       | 0 out of 1                        |

9a

TOPKAT\_Rat\_Male\_FDA\_None\_vs\_Carcinogen

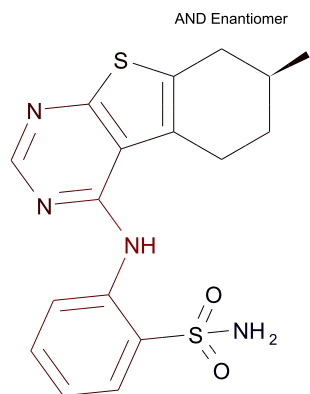C<sub>17</sub>H<sub>18</sub>N<sub>4</sub>O<sub>2</sub>S<sub>2</sub>

Molecular Weight: 374.48042

ALogP: 3.541

Rotatable Bonds: 3

Acceptors: 5

Donors: 2

**Model Prediction****Prediction: Carcinogen**

Probability: 0.434

Enrichment: 1.3

Bayesian Score: 2.49

Mahalanobis Distance: 17.6

Mahalanobis Distance p-value: 1.37e-012

Prediction: Positive if the Bayesian score is above the estimated best cutoff value from minimizing the false positive and false negative rate.

Probability: The estimated probability that the sample is in the positive category. This assumes that the Bayesian score follows a normal distribution and is different from the prediction using a cutoff.

Enrichment: An estimate of enrichment, that is, the increased likelihood (versus random) of this sample being in the category.

Bayesian Score: The standard Laplacian-modified Bayesian score.

Mahalanobis Distance: The Mahalanobis distance (MD) is the distance to the center of the training data. The larger the MD, the less trustworthy the prediction.

Mahalanobis Distance p-value: The p-value gives the fraction of training data with an MD greater than or equal to the one for the given sample, assuming normally distributed data. The smaller the p-value, the less trustworthy the prediction. For highly non-normal X properties (e.g., fingerprints), the MD p-value is wildly inaccurate.

**Structural Similar Compounds**

| Name               | Indapamide                                                          | Metolazone                                                          | Niclosamide                                                         |
|--------------------|---------------------------------------------------------------------|---------------------------------------------------------------------|---------------------------------------------------------------------|
| Structure          |                                                                     |                                                                     |                                                                     |
| Actual Endpoint    | Non-Carcinogen                                                      | Non-Carcinogen                                                      | Non-Carcinogen                                                      |
| Predicted Endpoint | Non-Carcinogen                                                      | Non-Carcinogen                                                      | Non-Carcinogen                                                      |
| Distance           | 0.572                                                               | 0.612                                                               | 0.613                                                               |
| Reference          | US FDA (Centre for Drug Eval.& Res./Off. Testing & Res.) Sept. 1997 | US FDA (Centre for Drug Eval.& Res./Off. Testing & Res.) Sept. 1997 | US FDA (Centre for Drug Eval.& Res./Off. Testing & Res.) Sept. 1997 |

**Model Applicability**

Unknown features are fingerprint features in the query molecule, but not found or appearing too infrequently in the training set.

1. All properties and OPS components are within expected ranges.

**Feature Contribution****Top features for positive contribution**

| Fingerprint | Bit/Smiles | Feature Structure                             | Score | Carcinogen in training set |
|-------------|------------|-----------------------------------------------|-------|----------------------------|
| SCFP_6      | 1310748454 | <br><chem>[*][c]1:[*]:[*]:[c]([*]):s:1</chem> | 0.437 | 7 out of 13                |

|                                               |                   |                                                                                                                                                                        |              |                                   |
|-----------------------------------------------|-------------------|------------------------------------------------------------------------------------------------------------------------------------------------------------------------|--------------|-----------------------------------|
| SCFP_6                                        | -55982834         | <p>AND Enantiomer</p> 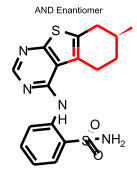 <p><chem>[*]:[c]1:[*]C[C@@H](C)CC1</chem></p>                | 0.432        | 4 out of 7                        |
| SCFP_6                                        | -1065373877       | <p>AND Enantiomer</p>  <p><chem>[*][c]1:[*]:[c](:[*]) :n:[cH]:n:1</chem></p>        | 0.429        | 3 out of 5                        |
| <b>Top Features for negative contribution</b> |                   |                                                                                                                                                                        |              |                                   |
| <b>Fingerprint</b>                            | <b>Bit/Smiles</b> | <b>Feature Structure</b>                                                                                                                                               | <b>Score</b> | <b>Carcinogen in training set</b> |
| SCFP_6                                        | -1358544872       | <p>AND Enantiomer</p>  <p><chem>[*]S(=[*])(=[*])N</chem></p>                        | -0.484       | 1 out of 7                        |
| SCFP_6                                        | -1272709286       | <p>AND Enantiomer</p>  <p><chem>[*]C([*])C[c](:[*]):[*]</chem></p>                 | -0.459       | 12 out of 61                      |
| SCFP_6                                        | -1463646519       | <p>AND Enantiomer</p>  <p><chem>[*][c](:[*]):[c](:[cH]1:[*])S(=O)(=O)N</chem></p> | -0.38        | 1 out of 6                        |



9b

TOPKAT\_Rat\_Male\_FDA\_None\_vs\_Carcinogen

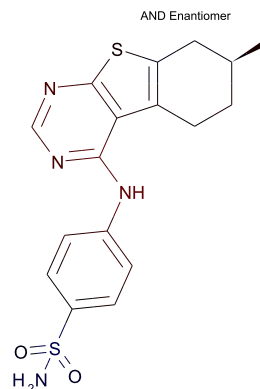C<sub>17</sub>H<sub>18</sub>N<sub>4</sub>O<sub>2</sub>S<sub>2</sub>

Molecular Weight: 374.48042

ALogP: 3.541

Rotatable Bonds: 3

Acceptors: 5

Donors: 2

**Model Prediction****Prediction: Carcinogen**

Probability: 0.397

Enrichment: 1.19

Bayesian Score: 1.36

Mahalanobis Distance: 17.4

Mahalanobis Distance p-value: 3.69e-012

Prediction: Positive if the Bayesian score is above the estimated best cutoff value from minimizing the false positive and false negative rate.

Probability: The estimated probability that the sample is in the positive category. This assumes that the Bayesian score follows a normal distribution and is different from the prediction using a cutoff.

Enrichment: An estimate of enrichment, that is, the increased likelihood (versus random) of this sample being in the category.

Bayesian Score: The standard Laplacian-modified Bayesian score.

Mahalanobis Distance: The Mahalanobis distance (MD) is the distance to the center of the training data. The larger the MD, the less trustworthy the prediction.

Mahalanobis Distance p-value: The p-value gives the fraction of training data with an MD greater than or equal to the one for the given sample, assuming normally distributed data. The smaller the p-value, the less trustworthy the prediction. For highly non-normal X properties (e.g., fingerprints), the MD p-value is wildly inaccurate.

**Structural Similar Compounds**

| Name               | Indapamide                                                          | Niclosamide                                                         | Metolazone                                                          |
|--------------------|---------------------------------------------------------------------|---------------------------------------------------------------------|---------------------------------------------------------------------|
| Structure          |                                                                     |                                                                     |                                                                     |
| Actual Endpoint    | Non-Carcinogen                                                      | Non-Carcinogen                                                      | Non-Carcinogen                                                      |
| Predicted Endpoint | Non-Carcinogen                                                      | Non-Carcinogen                                                      | Non-Carcinogen                                                      |
| Distance           | 0.581                                                               | 0.612                                                               | 0.616                                                               |
| Reference          | US FDA (Centre for Drug Eval.& Res./Off. Testing & Res.) Sept. 1997 | US FDA (Centre for Drug Eval.& Res./Off. Testing & Res.) Sept. 1997 | US FDA (Centre for Drug Eval.& Res./Off. Testing & Res.) Sept. 1997 |

**Model Applicability**

Unknown features are fingerprint features in the query molecule, but not found or appearing too infrequently in the training set.

1. All properties and OPS components are within expected ranges.

**Feature Contribution****Top features for positive contribution**

| Fingerprint | Bit/Smiles | Feature Structure                             | Score | Carcinogen in training set |
|-------------|------------|-----------------------------------------------|-------|----------------------------|
| SCFP_6      | 1310748454 | <br><chem>[*][c]1:[*]:[*]:[c]([*]):s:1</chem> | 0.437 | 7 out of 13                |

|                                               |                   |                                                                                                                                                           |              |                                   |
|-----------------------------------------------|-------------------|-----------------------------------------------------------------------------------------------------------------------------------------------------------|--------------|-----------------------------------|
| SCFP_6                                        | -55982834         | <p>AND Enantiomer</p> 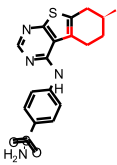 <p>[*][c]1:[*]C[C@@H](C)CC1</p>                 | 0.432        | 4 out of 7                        |
| SCFP_6                                        | -1065373877       | <p>AND Enantiomer</p>  <p>[*][c]1:[*]:[c](:[*])<br/>:n:[cH]:n:1</p>    | 0.429        | 3 out of 5                        |
| <b>Top Features for negative contribution</b> |                   |                                                                                                                                                           |              |                                   |
| <b>Fingerprint</b>                            | <b>Bit/Smiles</b> | <b>Feature Structure</b>                                                                                                                                  | <b>Score</b> | <b>Carcinogen in training set</b> |
| SCFP_6                                        | -1358544872       | <p>AND Enantiomer</p>  <p>[*]S(=[*])(=[*])N</p>                        | -0.484       | 1 out of 7                        |
| SCFP_6                                        | -1272709286       | <p>AND Enantiomer</p>  <p>[*]C([*])C[c](:[*]):[*]</p>                 | -0.459       | 12 out of 61                      |
| SCFP_6                                        | -1463646519       | <p>AND Enantiomer</p>  <p>[*][c](:[*]):[c](:[cH]1:[*])S(=O)(=O)N</p> | -0.38        | 1 out of 6                        |

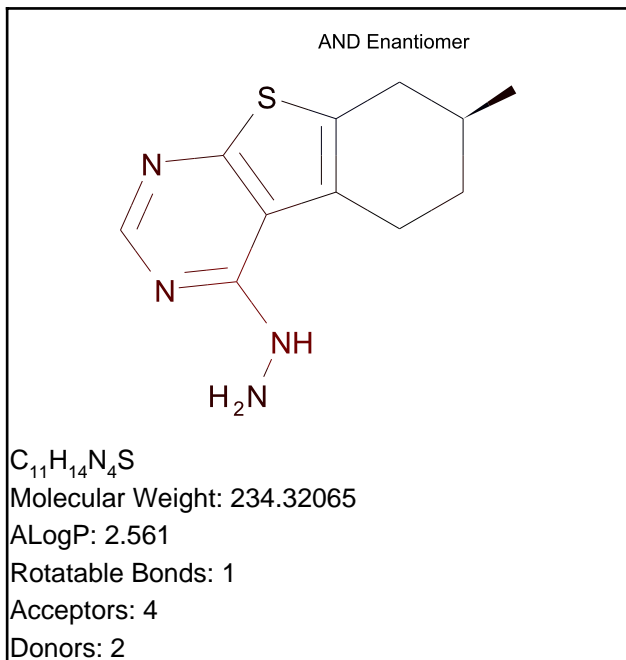

### Model Prediction

Prediction: **Carcinogen**

Probability: 0.485

Enrichment: 1.45

Bayesian Score: 3.95

Mahalanobis Distance: 18

Mahalanobis Distance p-value: 1.27e-013

Prediction: Positive if the Bayesian score is above the estimated best cutoff value from minimizing the false positive and false negative rate.

Probability: The estimated probability that the sample is in the positive category. This assumes that the Bayesian score follows a normal distribution and is different from the prediction using a cutoff.

Enrichment: An estimate of enrichment, that is, the increased likelihood (versus random) of this sample being in the category.

Bayesian Score: The standard Laplacian-modified Bayesian score.

Mahalanobis Distance: The Mahalanobis distance (MD) is the distance to the center of the training data. The larger the MD, the less trustworthy the prediction.

Mahalanobis Distance p-value: The p-value gives the fraction of training data with an MD greater than or equal to the one for the given sample, assuming normally distributed data. The smaller the p-value, the less trustworthy the prediction. For highly non-normal X properties (e.g., fingerprints), the MD p-value is wildly inaccurate.

### Structural Similar Compounds

| Name               | Lamotrigine                                                                         | Phenazopyridine                                                                     | Pyrimethamine                                                                       |
|--------------------|-------------------------------------------------------------------------------------|-------------------------------------------------------------------------------------|-------------------------------------------------------------------------------------|
| Structure          | 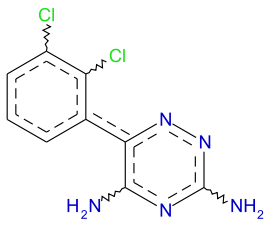 |  |  |
| Actual Endpoint    | Non-Carcinogen                                                                      | Carcinogen                                                                          | Non-Carcinogen                                                                      |
| Predicted Endpoint | Non-Carcinogen                                                                      | Carcinogen                                                                          | Non-Carcinogen                                                                      |
| Distance           | 0.566                                                                               | 0.578                                                                               | 0.585                                                                               |
| Reference          | US FDA (Centre for Drug Eval.& Res./Off. Testing & Res.) Sept. 1997                 | US FDA (Centre for Drug Eval.& Res./Off. Testing & Res.) Sept. 1997                 | US FDA (Centre for Drug Eval.& Res./Off. Testing & Res.) Sept. 1997                 |

### Model Applicability

Unknown features are fingerprint features in the query molecule, but not found or appearing too infrequently in the training set.

1. All properties and OPS components are within expected ranges.

### Feature Contribution

#### Top features for positive contribution

| Fingerprint | Bit/Smiles | Feature Structure                                                                                                                  | Score | Carcinogen in training set |
|-------------|------------|------------------------------------------------------------------------------------------------------------------------------------|-------|----------------------------|
| SCFP_6      | 1310748454 | 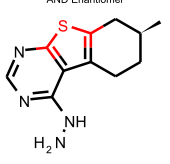<br><chem>[*][c]1:[*]:[*]:[c]([*]):s:1</chem> | 0.437 | 7 out of 13                |

|                                               |                   |                                                                                                                                                                      |              |                                   |
|-----------------------------------------------|-------------------|----------------------------------------------------------------------------------------------------------------------------------------------------------------------|--------------|-----------------------------------|
| SCFP_6                                        | -55982834         | <p>AND Enantiomer</p> 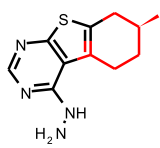 <p>[*]:c]1:[*]:C[C@@H](C)CC1</p>                           | 0.432        | 4 out of 7                        |
| SCFP_6                                        | -1065373877       | <p>AND Enantiomer</p>  <p>[*]:c]1:[*]:c]([*]) :n:[cH]:n:1</p>                     | 0.429        | 3 out of 5                        |
| <b>Top Features for negative contribution</b> |                   |                                                                                                                                                                      |              |                                   |
| <b>Fingerprint</b>                            | <b>Bit/Smiles</b> | <b>Feature Structure</b>                                                                                                                                             | <b>Score</b> | <b>Carcinogen in training set</b> |
| SCFP_6                                        | -1272709286       | <p>AND Enantiomer</p>  <p>[*]:C([*])C[c]([*]):[*] ]</p>                           | -0.459       | 12 out of 61                      |
| SCFP_6                                        | 815479470         | <p>AND Enantiomer</p>  <p>[*]:[C@H]1[*]:C[c]2:[c] (C1):s:[c]([*]):[c] :2:[*]</p> | -0.278       | 0 out of 1                        |
| SCFP_6                                        | 5                 | <p>AND Enantiomer</p>  <p>[*]:N</p>                                             | -0.232       | 41 out of 162                     |

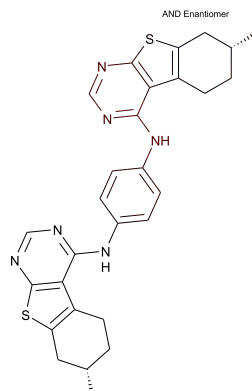

$C_{28}H_{28}N_6S_2$

Molecular Weight: 512.69212

ALogP: 7.842

Rotatable Bonds: 4

Acceptors: 6

Donors: 2

## Model Prediction

Prediction: **Carcinogen**

Probability: 0.418

Enrichment: 1.25

Bayesian Score: 1.99

Mahalanobis Distance: 17.3

Mahalanobis Distance p-value: 5.38e-012

Prediction: Positive if the Bayesian score is above the estimated best cutoff value from minimizing the false positive and false negative rate.

Probability: The estimated probability that the sample is in the positive category. This assumes that the Bayesian score follows a normal distribution and is different from the prediction using a cutoff.

Enrichment: An estimate of enrichment, that is, the increased likelihood (versus random) of this sample being in the category.

Bayesian Score: The standard Laplacian-modified Bayesian score.

Mahalanobis Distance: The Mahalanobis distance (MD) is the distance to the center of the training data. The larger the MD, the less trustworthy the prediction.

Mahalanobis Distance p-value: The p-value gives the fraction of training data with an MD greater than or equal to the one for the given sample, assuming normally distributed data. The smaller the p-value, the less trustworthy the prediction. For highly non-normal X properties (e.g., fingerprints), the MD p-value is wildly inaccurate.

## Structural Similar Compounds

| Name               | ProbucoI                                                            | Emetine                                                             | Carbenicillin                                                       |
|--------------------|---------------------------------------------------------------------|---------------------------------------------------------------------|---------------------------------------------------------------------|
| Structure          |                                                                     |                                                                     |                                                                     |
| Actual Endpoint    | Non-Carcinogen                                                      | Non-Carcinogen                                                      | Non-Carcinogen                                                      |
| Predicted Endpoint | Non-Carcinogen                                                      | Non-Carcinogen                                                      | Non-Carcinogen                                                      |
| Distance           | 0.846                                                               | 0.878                                                               | 0.909                                                               |
| Reference          | US FDA (Centre for Drug Eval.& Res./Off. Testing & Res.) Sept. 1997 | US FDA (Centre for Drug Eval.& Res./Off. Testing & Res.) Sept. 1997 | US FDA (Centre for Drug Eval.& Res./Off. Testing & Res.) Sept. 1997 |

## Model Applicability

Unknown features are fingerprint features in the query molecule, but not found or appearing too infrequently in the training set.

1. All properties and OPS components are within expected ranges.

## Feature Contribution

### Top features for positive contribution

| Fingerprint | Bit/Smiles | Feature Structure                                | Score | Carcinogen in training set |
|-------------|------------|--------------------------------------------------|-------|----------------------------|
| SCFP_6      | 1310748454 | <p><chem>[*][c]1:[*]:[*]:[c]([*]):s:1</chem></p> | 0.437 | 7 out of 13                |

|                                               |                   |                                                                                                                                                                   |              |                                   |
|-----------------------------------------------|-------------------|-------------------------------------------------------------------------------------------------------------------------------------------------------------------|--------------|-----------------------------------|
| SCFP_6                                        | -55982834         | <p>AND Enantiomer</p> 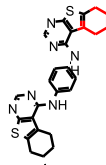 <p>[*]:[c]1:[*]:C[C@@H](C)CC1</p>                       | 0.432        | 4 out of 7                        |
| SCFP_6                                        | -1065373877       | <p>AND Enantiomer</p>  <p>[*][c]1:[*]:[c](:[*])<br/>:n:[cH]:n:1</p>            | 0.429        | 3 out of 5                        |
| <b>Top Features for negative contribution</b> |                   |                                                                                                                                                                   |              |                                   |
| <b>Fingerprint</b>                            | <b>Bit/Smiles</b> | <b>Feature Structure</b>                                                                                                                                          | <b>Score</b> | <b>Carcinogen in training set</b> |
| SCFP_6                                        | -1272709286       | <p>AND Enantiomer</p>  <p>[*]C([*])C[c](:[*]):[*]</p>                          | -0.459       | 12 out of 61                      |
| SCFP_6                                        | 815479470         | <p>AND Enantiomer</p>  <p>[*][C@H]1[*]C[c]2:[c](C1):s:[c](:[*]):[c]:2:[*]</p> | -0.278       | 0 out of 1                        |
| SCFP_6                                        | 2109165795        | <p>AND Enantiomer</p>  <p>[*]C[c]1:[c]([*]):[*]:[*]:[c]:1:[*]</p>            | -0.226       | 42 out of 165                     |

# Erlotinib

# TOPKAT\_Rat\_Male\_FDA\_None\_vs\_Carcinogen

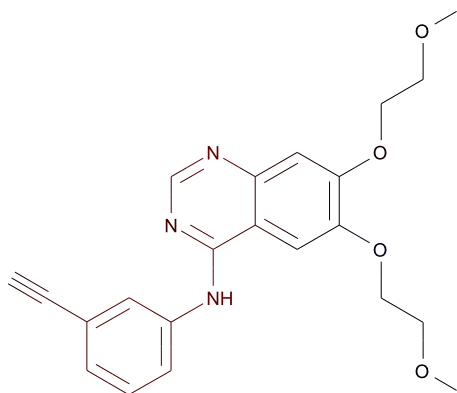

$C_{22}H_{23}N_3O_4$   
Molecular Weight: 393.43572  
ALogP: 4.309  
Rotatable Bonds: 10  
Acceptors: 7  
Donors: 1

## Model Prediction

**Prediction: Carcinogen**

Probability: 0.52

Enrichment: 1.56

Bayesian Score: 4.91

Mahalanobis Distance: 17.4

Mahalanobis Distance p-value: 2.91e-012

Prediction: Positive if the Bayesian score is above the estimated best cutoff value from minimizing the false positive and false negative rate.

Probability: The estimated probability that the sample is in the positive category. This assumes that the Bayesian score follows a normal distribution and is different from the prediction using a cutoff.

Enrichment: An estimate of enrichment, that is, the increased likelihood (versus random) of this sample being in the category.

Bayesian Score: The standard Laplacian-modified Bayesian score.

Mahalanobis Distance: The Mahalanobis distance (MD) is the distance to the center of the training data. The larger the MD, the less trustworthy the prediction.

Mahalanobis Distance p-value: The p-value gives the fraction of training data with an MD greater than or equal to the one for the given sample, assuming normally distributed data. The smaller the p-value, the less trustworthy the prediction. For highly non-normal X properties (e.g., fingerprints), the MD p-value is wildly inaccurate.

## Structural Similar Compounds

| Name               | Mycophenolate                                                                       | Nicardipine                                                                         | Nimodipine                                                                          |
|--------------------|-------------------------------------------------------------------------------------|-------------------------------------------------------------------------------------|-------------------------------------------------------------------------------------|
| Structure          | 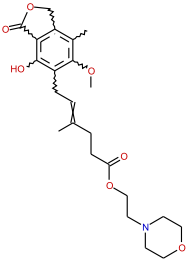 |  |  |
| Actual Endpoint    | Non-Carcinogen                                                                      | Carcinogen                                                                          | Carcinogen                                                                          |
| Predicted Endpoint | Non-Carcinogen                                                                      | Carcinogen                                                                          | Carcinogen                                                                          |
| Distance           | 0.624                                                                               | 0.667                                                                               | 0.676                                                                               |
| Reference          | US FDA (Centre for Drug Eval.& Res./Off. Testing & Res.) Sept. 1997                 | US FDA (Centre for Drug Eval.& Res./Off. Testing & Res.) Sept. 1997                 | US FDA (Centre for Drug Eval.& Res./Off. Testing & Res.) Sept. 1997                 |

## Model Applicability

Unknown features are fingerprint features in the query molecule, but not found or appearing too infrequently in the training set.

1. All properties and OPS components are within expected ranges.

## Feature Contribution

### Top features for positive contribution

| Fingerprint | Bit/Smiles | Feature Structure                                                                                                             | Score | Carcinogen in training set |
|-------------|------------|-------------------------------------------------------------------------------------------------------------------------------|-------|----------------------------|
| SCFP_6      | 1065373877 | 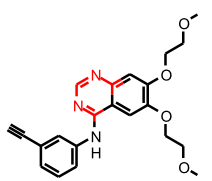<br>[*][c]1:[*]:[c](:[*])<br>:n:[cH]:n:1 | 0.429 | 3 out of 5                 |

|                                               |                   |                                                                                                                                                            |              |                                   |
|-----------------------------------------------|-------------------|------------------------------------------------------------------------------------------------------------------------------------------------------------|--------------|-----------------------------------|
| SCFP_6                                        | 123285475         | 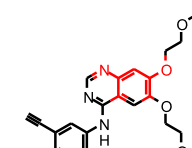<br><chem>[*]O[c]1:[cH]:[c]:(n:[*]):[c]([*]):[*]:[c]:1[*]</chem>         | 0.429        | 3 out of 5                        |
| SCFP_6                                        | -2147171373       | <br><chem>[*]N[c]1:n:[cH]:n:[*]:[c]:1[*]</chem>                         | 0.415        | 1 out of 1                        |
| <b>Top Features for negative contribution</b> |                   |                                                                                                                                                            |              |                                   |
| <b>Fingerprint</b>                            | <b>Bit/Smiles</b> | <b>Feature Structure</b>                                                                                                                                   | <b>Score</b> | <b>Carcinogen in training set</b> |
| SCFP_6                                        | 125474664         | <br><chem>[*]O[c]1:[cH]:[c](:[c]([*]):[*]):[c]([*]):[*]:[c]:1[*]</chem> | -0.484       | 1 out of 7                        |
| SCFP_6                                        | -417738003        | <br><chem>[*]OCCOC</chem>                                              | -0.264       | 1 out of 5                        |
| SCFP_6                                        | 951581613         | <br><chem>[*]:[c]([*])N[c]([*]):[*]</chem>                            | -0.132       | 1 out of 4                        |



5a

TOPKAT\_Rat\_Male\_FDA\_Single\_vs\_Multiple

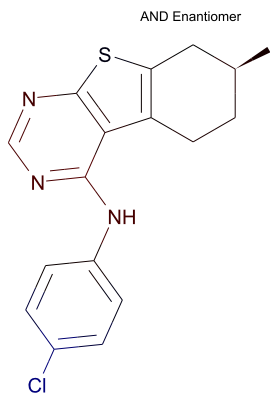C<sub>17</sub>H<sub>16</sub>ClN<sub>3</sub>S

Molecular Weight: 329.84704

ALogP: 5.5

Rotatable Bonds: 2

Acceptors: 3

Donors: 1

**Model Prediction**

Prediction: Single-Carcinogen

Probability: 0.562

Enrichment: 1.36

Bayesian Score: -0.202

Mahalanobis Distance: 24.2

Mahalanobis Distance p-value: 7.52e-014

Prediction: Positive if the Bayesian score is above the estimated best cutoff value from minimizing the false positive and false negative rate.

Probability: The estimated probability that the sample is in the positive category. This assumes that the Bayesian score follows a normal distribution and is different from the prediction using a cutoff.

Enrichment: An estimate of enrichment, that is, the increased likelihood (versus random) of this sample being in the category.

Bayesian Score: The standard Laplacian-modified Bayesian score.

Mahalanobis Distance: The Mahalanobis distance (MD) is the distance to the center of the training data. The larger the MD, the less trustworthy the prediction.

Mahalanobis Distance p-value: The p-value gives the fraction of training data with an MD greater than or equal to the one for the given sample, assuming normally distributed data. The smaller the p-value, the less trustworthy the prediction. For highly non-normal X properties (e.g., fingerprints), the MD p-value is wildly inaccurate.

**Structural Similar Compounds**

| Name               | Nafenopin                                                           | Mestranol                                                           | Chlorpromazine                                                      |
|--------------------|---------------------------------------------------------------------|---------------------------------------------------------------------|---------------------------------------------------------------------|
| Structure          |                                                                     |                                                                     |                                                                     |
| Actual Endpoint    | Multiple-Carcinogen                                                 | Single-Carcinogen                                                   | Single-Carcinogen                                                   |
| Predicted Endpoint | Multiple-Carcinogen                                                 | Multiple-Carcinogen                                                 | Single-Carcinogen                                                   |
| Distance           | 0.637                                                               | 0.656                                                               | 0.720                                                               |
| Reference          | US FDA (Centre for Drug Eval.& Res./Off. Testing & Res.) Sept. 1997 | US FDA (Centre for Drug Eval.& Res./Off. Testing & Res.) Sept. 1997 | US FDA (Centre for Drug Eval.& Res./Off. Testing & Res.) Sept. 1997 |

**Model Applicability**

Unknown features are fingerprint features in the query molecule, but not found or appearing too infrequently in the training set.

1. All properties and OPS components are within expected ranges.

**Feature Contribution****Top features for positive contribution**

| Fingerprint | Bit/Smiles  | Feature Structure                                  | Score | Multiple-Carcinogen in training set |
|-------------|-------------|----------------------------------------------------|-------|-------------------------------------|
| SCFP_8      | -1065373877 | <br><chem>[*][c]1:[*]:[c](:[*]) :n:[cH]:n:1</chem> | 0.649 | 3 out of 3                          |

|                                               |                   |                                                                                                                                                         |              |                                            |
|-----------------------------------------------|-------------------|---------------------------------------------------------------------------------------------------------------------------------------------------------|--------------|--------------------------------------------|
| SCFP_8                                        | -1181430618       | <p>AND Enantiomer</p> 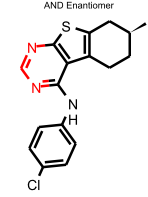 <p>[*]:n:[cH]:n:[*]</p>                       | 0.453        | 4 out of 6                                 |
| SCFP_8                                        | -2147171373       | <p>AND Enantiomer</p>  <p>[*]N[c]1:n:[cH]:n:[*]<br/>:[c]:1:[*]</p>   | 0.383        | 1 out of 1                                 |
| <b>Top Features for negative contribution</b> |                   |                                                                                                                                                         |              |                                            |
| <b>Fingerprint</b>                            | <b>Bit/Smiles</b> | <b>Feature Structure</b>                                                                                                                                | <b>Score</b> | <b>Multiple-Carcinogen in training set</b> |
| SCFP_8                                        | -52074512         | <p>AND Enantiomer</p>  <p>[*]:[c](:[*])Cl</p>                        | -0.707       | 2 out of 14                                |
| SCFP_8                                        | -601571304        | <p>AND Enantiomer</p>  <p>[*]:[cH]:[c](Cl):[cH]<br/>:[*]</p>       | -0.707       | 2 out of 14                                |
| SCFP_8                                        | -1378360678       | <p>AND Enantiomer</p>  <p>[*][c]1:[*]:[cH]:[c](Cl):[cH]:[cH]:1</p> | -0.58        | 2 out of 12                                |



5b

TOPKAT\_Rat\_Male\_FDA\_Single\_vs\_Multiple

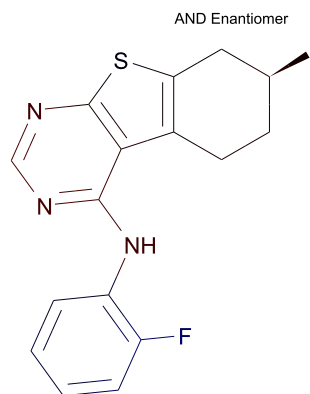C<sub>17</sub>H<sub>16</sub>FN<sub>3</sub>S

Molecular Weight: 313.39244

ALogP: 5.041

Rotatable Bonds: 2

Acceptors: 3

Donors: 1

**Model Prediction**

Prediction: Single-Carcinogen

Probability: 0.566

Enrichment: 1.37

Bayesian Score: 0.263

Mahalanobis Distance: 23.6

Mahalanobis Distance p-value: 2.79e-013

Prediction: Positive if the Bayesian score is above the estimated best cutoff value from minimizing the false positive and false negative rate.

Probability: The estimated probability that the sample is in the positive category. This assumes that the Bayesian score follows a normal distribution and is different from the prediction using a cutoff.

Enrichment: An estimate of enrichment, that is, the increased likelihood (versus random) of this sample being in the category.

Bayesian Score: The standard Laplacian-modified Bayesian score.

Mahalanobis Distance: The Mahalanobis distance (MD) is the distance to the center of the training data. The larger the MD, the less trustworthy the prediction.

Mahalanobis Distance p-value: The p-value gives the fraction of training data with an MD greater than or equal to the one for the given sample, assuming normally distributed data. The smaller the p-value, the less trustworthy the prediction. For highly non-normal X properties (e.g., fingerprints), the MD p-value is wildly inaccurate.

**Structural Similar Compounds**

| Name               | Nafenopin                                                           | Mestranol                                                           | Norethindrone                                                       |
|--------------------|---------------------------------------------------------------------|---------------------------------------------------------------------|---------------------------------------------------------------------|
| Structure          |                                                                     |                                                                     |                                                                     |
| Actual Endpoint    | Multiple-Carcinogen                                                 | Single-Carcinogen                                                   | Multiple-Carcinogen                                                 |
| Predicted Endpoint | Multiple-Carcinogen                                                 | Multiple-Carcinogen                                                 | Multiple-Carcinogen                                                 |
| Distance           | 0.622                                                               | 0.653                                                               | 0.698                                                               |
| Reference          | US FDA (Centre for Drug Eval.& Res./Off. Testing & Res.) Sept. 1997 | US FDA (Centre for Drug Eval.& Res./Off. Testing & Res.) Sept. 1997 | US FDA (Centre for Drug Eval.& Res./Off. Testing & Res.) Sept. 1997 |

**Model Applicability**

Unknown features are fingerprint features in the query molecule, but not found or appearing too infrequently in the training set.

- All properties and OPS components are within expected ranges.

**Feature Contribution****Top features for positive contribution**

| Fingerprint | Bit/Smiles  | Feature Structure                                  | Score | Multiple-Carcinogen in training set |
|-------------|-------------|----------------------------------------------------|-------|-------------------------------------|
| SCFP_8      | -1065373877 | <br><chem>[*][c]1:[*]:[c](:[*]) :n:[cH]:n:1</chem> | 0.649 | 3 out of 3                          |

|                                               |                   |                                                                                                                                                           |              |                                            |
|-----------------------------------------------|-------------------|-----------------------------------------------------------------------------------------------------------------------------------------------------------|--------------|--------------------------------------------|
| SCFP_8                                        | -1181430618       | <p>AND Enantiomer</p> 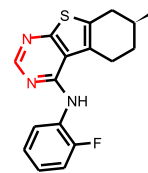 <p>[*]:n:[cH]:n:[*]</p>                         | 0.453        | 4 out of 6                                 |
| SCFP_8                                        | -2147171373       | <p>AND Enantiomer</p>  <p>[*]N[c]1:n:[cH]:n:[*]<br/>:[c]:1:[*]</p>     | 0.383        | 1 out of 1                                 |
| <b>Top Features for negative contribution</b> |                   |                                                                                                                                                           |              |                                            |
| <b>Fingerprint</b>                            | <b>Bit/Smiles</b> | <b>Feature Structure</b>                                                                                                                                  | <b>Score</b> | <b>Multiple-Carcinogen in training set</b> |
| SCFP_8                                        | 1655894345        | <p>AND Enantiomer</p>  <p>[*][c]1:[cH]:[cH]:[cH]<br/>:[cH]:[c]:1F</p>  | -0.546       | 0 out of 2                                 |
| SCFP_8                                        | -1794884847       | <p>AND Enantiomer</p>  <p>[*]:[c](:[*])F</p>                         | -0.463       | 1 out of 6                                 |
| SCFP_8                                        | -1381307546       | <p>AND Enantiomer</p>  <p>[*][c]1:[*]:[cH]:[cH]<br/>:[cH]:[c]:1F</p> | -0.463       | 1 out of 6                                 |



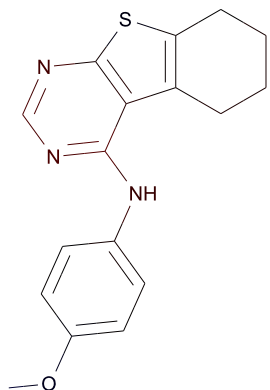

$C_{17}H_{17}N_3OS$

Molecular Weight: 311.40138

ALogP: 4.568

Rotatable Bonds: 3

Acceptors: 4

Donors: 1

## Model Prediction

**Prediction: Multiple-Carcinogen**

Probability: 0.569

Enrichment: 1.37

Bayesian Score: 1.66

Mahalanobis Distance: 22.3

Mahalanobis Distance p-value: 3.23e-012

Prediction: Positive if the Bayesian score is above the estimated best cutoff value from minimizing the false positive and false negative rate.

Probability: The estimated probability that the sample is in the positive category. This assumes that the Bayesian score follows a normal distribution and is different from the prediction using a cutoff.

Enrichment: An estimate of enrichment, that is, the increased likelihood (versus random) of this sample being in the category.

Bayesian Score: The standard Laplacian-modified Bayesian score.

Mahalanobis Distance: The Mahalanobis distance (MD) is the distance to the center of the training data. The larger the MD, the less trustworthy the prediction.

Mahalanobis Distance p-value: The p-value gives the fraction of training data with an MD greater than or equal to the one for the given sample, assuming normally distributed data. The smaller the p-value, the less trustworthy the prediction. For highly non-normal X properties (e.g., fingerprints), the MD p-value is wildly inaccurate.

## Structural Similar Compounds

| Name               | Nafenopin                                                           | Phenolphthalein                                                     | Flutamide                                                           |
|--------------------|---------------------------------------------------------------------|---------------------------------------------------------------------|---------------------------------------------------------------------|
| Structure          |                                                                     |                                                                     |                                                                     |
| Actual Endpoint    | Multiple-Carcinogen                                                 | Multiple-Carcinogen                                                 | Multiple-Carcinogen                                                 |
| Predicted Endpoint | Multiple-Carcinogen                                                 | Multiple-Carcinogen                                                 | Multiple-Carcinogen                                                 |
| Distance           | 0.613                                                               | 0.671                                                               | 0.683                                                               |
| Reference          | US FDA (Centre for Drug Eval.& Res./Off. Testing & Res.) Sept. 1997 | US FDA (Centre for Drug Eval.& Res./Off. Testing & Res.) Sept. 1997 | US FDA (Centre for Drug Eval.& Res./Off. Testing & Res.) Sept. 1997 |

## Model Applicability

Unknown features are fingerprint features in the query molecule, but not found or appearing too infrequently in the training set.

1. All properties and OPS components are within expected ranges.

## Feature Contribution

### Top features for positive contribution

| Fingerprint | Bit/Smiles  | Feature Structure                        | Score | Multiple-Carcinogen in training set |
|-------------|-------------|------------------------------------------|-------|-------------------------------------|
| SCFP_8      | -1065373877 | <br>[*][c]1:[*]:[c](:[*])<br>:n:[cH]:n:1 | 0.649 | 3 out of 3                          |

|                                               |                   |                                                                                                                                |              |                                            |
|-----------------------------------------------|-------------------|--------------------------------------------------------------------------------------------------------------------------------|--------------|--------------------------------------------|
| SCFP_8                                        | -1181430618       | 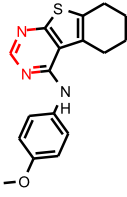<br>[*]:n:[cH]:n:[*]                        | 0.453        | 4 out of 6                                 |
| SCFP_8                                        | 951581613         | <br>[*]:[c](:[*])N[c](:[*]):[*]             | 0.383        | 1 out of 1                                 |
| <b>Top Features for negative contribution</b> |                   |                                                                                                                                |              |                                            |
| <b>Fingerprint</b>                            | <b>Bit/Smiles</b> | <b>Feature Structure</b>                                                                                                       | <b>Score</b> | <b>Multiple-Carcinogen in training set</b> |
| SCFP_8                                        | 136239834         | <br>[*]OC                                   | -0.358       | 3 out of 13                                |
| SCFP_8                                        | 803350837         | <br>[*]C[c]1:s:[*]:[*]:[c]:1[*]           | -0.31        | 0 out of 1                                 |
| SCFP_8                                        | 1287669168        | <br>[*][c]1:[cH]:[cH]:[c](OC):[cH]:[cH]:1 | -0.31        | 0 out of 1                                 |





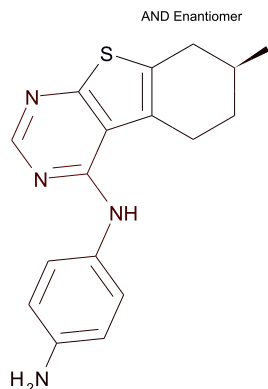

$C_{17}H_{18}N_4S$

Molecular Weight: 310.41662

ALogP: 4.089

Rotatable Bonds: 2

Acceptors: 4

Donors: 2

## Model Prediction

**Prediction: Multiple-Carcinogen**

Probability: 0.558

Enrichment: 1.35

Bayesian Score: 3.3

Mahalanobis Distance: 22.1

Mahalanobis Distance p-value: 4.4e-012

Prediction: Positive if the Bayesian score is above the estimated best cutoff value from minimizing the false positive and false negative rate.

Probability: The estimated probability that the sample is in the positive category. This assumes that the Bayesian score follows a normal distribution and is different from the prediction using a cutoff.

Enrichment: An estimate of enrichment, that is, the increased likelihood (versus random) of this sample being in the category.

Bayesian Score: The standard Laplacian-modified Bayesian score.

Mahalanobis Distance: The Mahalanobis distance (MD) is the distance to the center of the training data. The larger the MD, the less trustworthy the prediction.

Mahalanobis Distance p-value: The p-value gives the fraction of training data with an MD greater than or equal to the one for the given sample, assuming normally distributed data. The smaller the p-value, the less trustworthy the prediction. For highly non-normal X properties (e.g., fingerprints), the MD p-value is wildly inaccurate.

## Structural Similar Compounds

| Name               | Phenolphthalein                                                     | Oxazepam                                                            | Doxefazepam                                                         |
|--------------------|---------------------------------------------------------------------|---------------------------------------------------------------------|---------------------------------------------------------------------|
| Structure          |                                                                     |                                                                     |                                                                     |
| Actual Endpoint    | Multiple-Carcinogen                                                 | Single-Carcinogen                                                   | Single-Carcinogen                                                   |
| Predicted Endpoint | Multiple-Carcinogen                                                 | Single-Carcinogen                                                   | Single-Carcinogen                                                   |
| Distance           | 0.572                                                               | 0.683                                                               | 0.684                                                               |
| Reference          | US FDA (Centre for Drug Eval.& Res./Off. Testing & Res.) Sept. 1997 | US FDA (Centre for Drug Eval.& Res./Off. Testing & Res.) Sept. 1997 | US FDA (Centre for Drug Eval.& Res./Off. Testing & Res.) Sept. 1997 |

## Model Applicability

Unknown features are fingerprint features in the query molecule, but not found or appearing too infrequently in the training set.

1. All properties and OPS components are within expected ranges.

## Feature Contribution

### Top features for positive contribution

| Fingerprint | Bit/Smiles  | Feature Structure                                  | Score | Multiple-Carcinogen in training set |
|-------------|-------------|----------------------------------------------------|-------|-------------------------------------|
| SCFP_8      | -1065373877 | <br><chem>[*][c]1:[*]:[c](:[*]) :n:[cH]:n:1</chem> | 0.649 | 3 out of 3                          |

|                                               |                   |                                                                                                                                                  |              |                                            |
|-----------------------------------------------|-------------------|--------------------------------------------------------------------------------------------------------------------------------------------------|--------------|--------------------------------------------|
| SCFP_8                                        | -1181430618       | <p>AND Enantiomer</p> 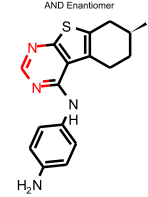 <p>[*]:n:[cH]:n:[*]</p>                | 0.453        | 4 out of 6                                 |
| SCFP_8                                        | 951581613         | <p>AND Enantiomer</p>  <p>[*]:[c](:[*])N[c](:[*])]:[*]</p>    | 0.383        | 1 out of 1                                 |
| <b>Top Features for negative contribution</b> |                   |                                                                                                                                                  |              |                                            |
| <b>Fingerprint</b>                            | <b>Bit/Smiles</b> | <b>Feature Structure</b>                                                                                                                         | <b>Score</b> | <b>Multiple-Carcinogen in training set</b> |
| SCFP_8                                        | 803350837         | <p>AND Enantiomer</p>  <p>[*]C[c]1:s:[*]:[*]:[c]:1[*]</p>     | -0.31        | 0 out of 1                                 |
| SCFP_8                                        | 1310748454        | <p>AND Enantiomer</p>  <p>[*][c]1:[*]:[*]:[c](:[*]):s:1</p> | -0.166       | 2 out of 7                                 |
| SCFP_8                                        | 8                 | <p>AND Enantiomer</p>  <p>[*]:n:[*]</p>                     | -0.154       | 12 out of 39                               |



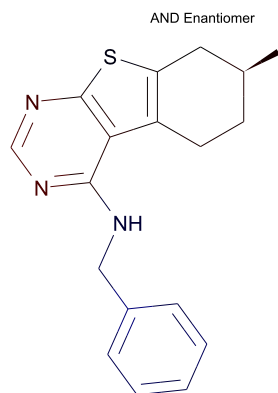

$C_{18}H_{19}N_3S$

Molecular Weight: 309.42856

ALogP: 4.678

Rotatable Bonds: 3

Acceptors: 3

Donors: 1

## Model Prediction

Prediction: Single-Carcinogen

Probability: 0.554

Enrichment: 1.34

Bayesian Score: -0.906

Mahalanobis Distance: 19.9

Mahalanobis Distance p-value: 3.76e-010

Prediction: Positive if the Bayesian score is above the estimated best cutoff value from minimizing the false positive and false negative rate.

Probability: The estimated probability that the sample is in the positive category. This assumes that the Bayesian score follows a normal distribution and is different from the prediction using a cutoff.

Enrichment: An estimate of enrichment, that is, the increased likelihood (versus random) of this sample being in the category.

Bayesian Score: The standard Laplacian-modified Bayesian score.

Mahalanobis Distance: The Mahalanobis distance (MD) is the distance to the center of the training data. The larger the MD, the less trustworthy the prediction.

Mahalanobis Distance p-value: The p-value gives the fraction of training data with an MD greater than or equal to the one for the given sample, assuming normally distributed data. The smaller the p-value, the less trustworthy the prediction. For highly non-normal X properties (e.g., fingerprints), the MD p-value is wildly inaccurate.

## Structural Similar Compounds

| Name               | Nafenopin                                                           | Mestranol                                                           | Flutamide                                                           |
|--------------------|---------------------------------------------------------------------|---------------------------------------------------------------------|---------------------------------------------------------------------|
| Structure          |                                                                     |                                                                     |                                                                     |
| Actual Endpoint    | Multiple-Carcinogen                                                 | Single-Carcinogen                                                   | Multiple-Carcinogen                                                 |
| Predicted Endpoint | Multiple-Carcinogen                                                 | Multiple-Carcinogen                                                 | Multiple-Carcinogen                                                 |
| Distance           | 0.560                                                               | 0.677                                                               | 0.685                                                               |
| Reference          | US FDA (Centre for Drug Eval.& Res./Off. Testing & Res.) Sept. 1997 | US FDA (Centre for Drug Eval.& Res./Off. Testing & Res.) Sept. 1997 | US FDA (Centre for Drug Eval.& Res./Off. Testing & Res.) Sept. 1997 |

## Model Applicability

Unknown features are fingerprint features in the query molecule, but not found or appearing too infrequently in the training set.

1. OPS PC20 out of range. Value: 3.0614. Training min, max, SD, explained variance: -2.6601, 2.9766, 1.03, 0.0144.

## Feature Contribution

### Top features for positive contribution

| Fingerprint | Bit/Smiles  | Feature Structure                                  | Score | Multiple-Carcinogen in training set |
|-------------|-------------|----------------------------------------------------|-------|-------------------------------------|
| SCFP_8      | -1065373877 | <br><chem>[*][c]1:[*]:[c](:[*]) :n:[cH]:n:1</chem> | 0.649 | 3 out of 3                          |

|                                               |                   |                                                                                                                                                              |              |                                            |
|-----------------------------------------------|-------------------|--------------------------------------------------------------------------------------------------------------------------------------------------------------|--------------|--------------------------------------------|
| SCFP_8                                        | -1181430618       | <p>AND Enantiomer</p> 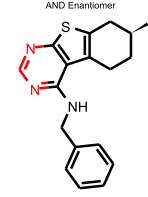 <p>[*]:n:[cH]:n:[*]</p>                            | 0.453        | 4 out of 6                                 |
| SCFP_8                                        | -2147171373       | <p>AND Enantiomer</p>  <p>[*]N[c]1:n:[cH]:n:[*]<br/>:[c]:1:[*]</p>        | 0.383        | 1 out of 1                                 |
| <b>Top Features for negative contribution</b> |                   |                                                                                                                                                              |              |                                            |
| <b>Fingerprint</b>                            | <b>Bit/Smiles</b> | <b>Feature Structure</b>                                                                                                                                     | <b>Score</b> | <b>Multiple-Carcinogen in training set</b> |
| SCFP_8                                        | 1653911926        | <p>AND Enantiomer</p>  <p>[*][c]1:[cH]:[cH]:[cH]<br/>:[cH]:[cH]:1</p>     | -0.985       | 1 out of 12                                |
| SCFP_8                                        | 1155330592        | <p>AND Enantiomer</p>  <p>[*]NC[c]:[*]:[*]</p>                          | -0.737       | 0 out of 3                                 |
| SCFP_8                                        | 1271460694        | <p>AND Enantiomer</p>  <p>[*]NC[c]1:[cH]:[cH]:[cH]:[cH]:[cH]:[cH]:1</p> | -0.31        | 0 out of 1                                 |



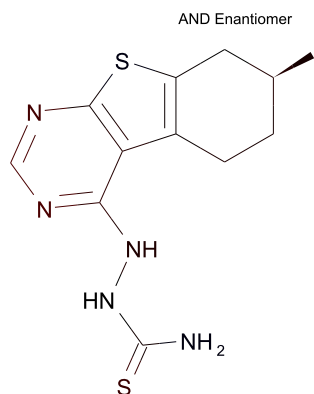

$C_{12}H_{15}N_5S_2$   
 Molecular Weight: 293.411  
 ALogP: 3.209  
 Rotatable Bonds: 3  
 Acceptors: 4  
 Donors: 3

### Model Prediction

**Prediction: Multiple-Carcinogen**

Probability: 0.559

Enrichment: 1.35

Bayesian Score: 3.26

Mahalanobis Distance: 23.3

Mahalanobis Distance p-value: 4.48e-013

Prediction: Positive if the Bayesian score is above the estimated best cutoff value from minimizing the false positive and false negative rate.

Probability: The estimated probability that the sample is in the positive category. This assumes that the Bayesian score follows a normal distribution and is different from the prediction using a cutoff.

Enrichment: An estimate of enrichment, that is, the increased likelihood (versus random) of this sample being in the category.

Bayesian Score: The standard Laplacian-modified Bayesian score.

Mahalanobis Distance: The Mahalanobis distance (MD) is the distance to the center of the training data. The larger the MD, the less trustworthy the prediction.

Mahalanobis Distance p-value: The p-value gives the fraction of training data with an MD greater than or equal to the one for the given sample, assuming normally distributed data. The smaller the p-value, the less trustworthy the prediction. For highly non-normal X properties (e.g., fingerprints), the MD p-value is wildly inaccurate.

### Structural Similar Compounds

| Name               | Furoseamide                                                         | Phenazopyridine                                                     | Torseamide                                                          |
|--------------------|---------------------------------------------------------------------|---------------------------------------------------------------------|---------------------------------------------------------------------|
| Structure          |                                                                     |                                                                     |                                                                     |
| Actual Endpoint    | Single-Carcinogen                                                   | Single-Carcinogen                                                   | Multiple-Carcinogen                                                 |
| Predicted Endpoint | Single-Carcinogen                                                   | Single-Carcinogen                                                   | Multiple-Carcinogen                                                 |
| Distance           | 0.742                                                               | 0.758                                                               | 0.774                                                               |
| Reference          | US FDA (Centre for Drug Eval.& Res./Off. Testing & Res.) Sept. 1997 | US FDA (Centre for Drug Eval.& Res./Off. Testing & Res.) Sept. 1997 | US FDA (Centre for Drug Eval.& Res./Off. Testing & Res.) Sept. 1997 |

### Model Applicability

Unknown features are fingerprint features in the query molecule, but not found or appearing too infrequently in the training set.

- OPS PC20 out of range. Value: 3.0652. Training min, max, SD, explained variance: -2.6601, 2.9766, 1.03, 0.0144.

### Feature Contribution

#### Top features for positive contribution

| Fingerprint | Bit/Smiles  | Feature Structure                                  | Score | Multiple-Carcinogen in training set |
|-------------|-------------|----------------------------------------------------|-------|-------------------------------------|
| SCFP_8      | -1065373877 | <br><chem>[*][c]1:[*]:[c](:[*]) :n:[cH]:n:1</chem> | 0.649 | 3 out of 3                          |



|                                               |                   |                                                                                                                                                  |              |                                            |
|-----------------------------------------------|-------------------|--------------------------------------------------------------------------------------------------------------------------------------------------|--------------|--------------------------------------------|
| SCFP_8                                        | 18                | <p>AND Enantiomer</p> 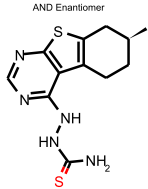 <p>[*]=S</p>                           | 0.553        | 2 out of 2                                 |
| SCFP_8                                        | 1435188938        | <p>AND Enantiomer</p>  <p>[*]C(=S)[*]</p>                     | 0.553        | 2 out of 2                                 |
| <b>Top Features for negative contribution</b> |                   |                                                                                                                                                  |              |                                            |
| <b>Fingerprint</b>                            | <b>Bit/Smiles</b> | <b>Feature Structure</b>                                                                                                                         | <b>Score</b> | <b>Multiple-Carcinogen in training set</b> |
| SCFP_8                                        | 384861283         | <p>AND Enantiomer</p>  <p>[*]C(=[*])N</p>                     | -0.31        | 0 out of 1                                 |
| SCFP_8                                        | 803350837         | <p>AND Enantiomer</p>  <p>[*]C[c]1:s:[*]:[*]:[c]:1[*]</p>   | -0.31        | 0 out of 1                                 |
| SCFP_8                                        | 1310748454        | <p>AND Enantiomer</p>  <p>[*][c]1:[*]:[*]:[c](:[*]):s:1</p> | -0.166       | 2 out of 7                                 |



9a

TOPKAT\_Rat\_Male\_FDA\_Single\_vs\_Multiple

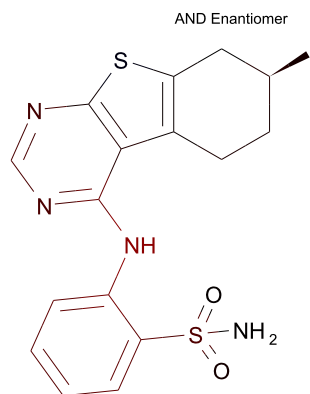C<sub>17</sub>H<sub>18</sub>N<sub>4</sub>O<sub>2</sub>S<sub>2</sub>

Molecular Weight: 374.48042

ALogP: 3.541

Rotatable Bonds: 3

Acceptors: 5

Donors: 2

**Model Prediction****Prediction: Multiple-Carcinogen**

Probability: 0.558

Enrichment: 1.35

Bayesian Score: 3.32

Mahalanobis Distance: 24.5

Mahalanobis Distance p-value: 5.12e-014

Prediction: Positive if the Bayesian score is above the estimated best cutoff value from minimizing the false positive and false negative rate.

Probability: The estimated probability that the sample is in the positive category. This assumes that the Bayesian score follows a normal distribution and is different from the prediction using a cutoff.

Enrichment: An estimate of enrichment, that is, the increased likelihood (versus random) of this sample being in the category.

Bayesian Score: The standard Laplacian-modified Bayesian score.

Mahalanobis Distance: The Mahalanobis distance (MD) is the distance to the center of the training data. The larger the MD, the less trustworthy the prediction.

Mahalanobis Distance p-value: The p-value gives the fraction of training data with an MD greater than or equal to the one for the given sample, assuming normally distributed data. The smaller the p-value, the less trustworthy the prediction. For highly non-normal X properties (e.g., fingerprints), the MD p-value is wildly inaccurate.

**Structural Similar Compounds**

| Name               | Torsemide                                                           | Doxefazepam                                                         | Bicalutamide                                                        |
|--------------------|---------------------------------------------------------------------|---------------------------------------------------------------------|---------------------------------------------------------------------|
| Structure          |                                                                     |                                                                     |                                                                     |
| Actual Endpoint    | Multiple-Carcinogen                                                 | Single-Carcinogen                                                   | Multiple-Carcinogen                                                 |
| Predicted Endpoint | Multiple-Carcinogen                                                 | Single-Carcinogen                                                   | Multiple-Carcinogen                                                 |
| Distance           | 0.684                                                               | 0.719                                                               | 0.722                                                               |
| Reference          | US FDA (Centre for Drug Eval.& Res./Off. Testing & Res.) Sept. 1997 | US FDA (Centre for Drug Eval.& Res./Off. Testing & Res.) Sept. 1997 | US FDA (Centre for Drug Eval.& Res./Off. Testing & Res.) Sept. 1997 |

**Model Applicability**

Unknown features are fingerprint features in the query molecule, but not found or appearing too infrequently in the training set.

1. All properties and OPS components are within expected ranges.

**Feature Contribution****Top features for positive contribution**

| Fingerprint | Bit/Smiles  | Feature Structure                                  | Score | Multiple-Carcinogen in training set |
|-------------|-------------|----------------------------------------------------|-------|-------------------------------------|
| SCFP_8      | -1065373877 | <br><chem>[*][c]1:[*]:[c](:[*]) :n:[cH]:n:1</chem> | 0.649 | 3 out of 3                          |

|                                               |                   |                                                                                                                                                              |              |                                            |
|-----------------------------------------------|-------------------|--------------------------------------------------------------------------------------------------------------------------------------------------------------|--------------|--------------------------------------------|
| SCFP_8                                        | -1181430618       | <p>AND Enantiomer</p> 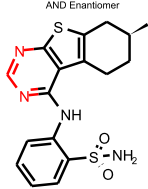 <p>[*]:n:[cH]:n:[*]</p>                            | 0.453        | 4 out of 6                                 |
| SCFP_8                                        | -2147171373       | <p>AND Enantiomer</p>  <p>[*]N[c]1:n:[cH]:n:[*]<br/>:[c]:1:[*]</p>        | 0.383        | 1 out of 1                                 |
| <b>Top Features for negative contribution</b> |                   |                                                                                                                                                              |              |                                            |
| <b>Fingerprint</b>                            | <b>Bit/Smiles</b> | <b>Feature Structure</b>                                                                                                                                     | <b>Score</b> | <b>Multiple-Carcinogen in training set</b> |
| SCFP_8                                        | 182991870         | <p>AND Enantiomer</p>  <p>[*]:c(:[*])S(=O)(=O)<br/>)N</p>                 | -0.342       | 1 out of 5                                 |
| SCFP_8                                        | -1463646519       | <p>AND Enantiomer</p>  <p>[*][c](:[*]):[c](:[cH<br/>]:[*])S(=O)(=O)N</p> | -0.31        | 0 out of 1                                 |
| SCFP_8                                        | 803350837         | <p>AND Enantiomer</p>  <p>[*]C[c]1:s:[*]:[*]:[c<br/>]:1[*]</p>          | -0.31        | 0 out of 1                                 |



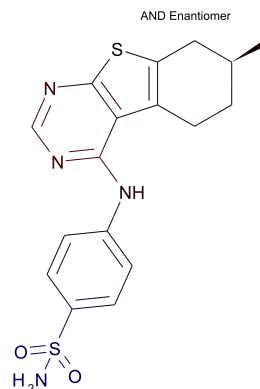

$C_{17}H_{18}N_4O_2S_2$

Molecular Weight: 374.48042

ALogP: 3.541

Rotatable Bonds: 3

Acceptors: 5

Donors: 2

## Model Prediction

Prediction: Single-Carcinogen

Probability: 0.567

Enrichment: 1.37

Bayesian Score: 0.552

Mahalanobis Distance: 23.8

Mahalanobis Distance p-value: 1.59e-013

Prediction: Positive if the Bayesian score is above the estimated best cutoff value from minimizing the false positive and false negative rate.

Probability: The estimated probability that the sample is in the positive category. This assumes that the Bayesian score follows a normal distribution and is different from the prediction using a cutoff.

Enrichment: An estimate of enrichment, that is, the increased likelihood (versus random) of this sample being in the category.

Bayesian Score: The standard Laplacian-modified Bayesian score.

Mahalanobis Distance: The Mahalanobis distance (MD) is the distance to the center of the training data. The larger the MD, the less trustworthy the prediction.

Mahalanobis Distance p-value: The p-value gives the fraction of training data with an MD greater than or equal to the one for the given sample, assuming normally distributed data. The smaller the p-value, the less trustworthy the prediction. For highly non-normal X properties (e.g., fingerprints), the MD p-value is wildly inaccurate.

## Structural Similar Compounds

| Name               | Torsemide                                                           | Bicalutamide                                                        | Doxefazepam                                                         |
|--------------------|---------------------------------------------------------------------|---------------------------------------------------------------------|---------------------------------------------------------------------|
| Structure          |                                                                     |                                                                     |                                                                     |
| Actual Endpoint    | Multiple-Carcinogen                                                 | Multiple-Carcinogen                                                 | Single-Carcinogen                                                   |
| Predicted Endpoint | Multiple-Carcinogen                                                 | Multiple-Carcinogen                                                 | Single-Carcinogen                                                   |
| Distance           | 0.714                                                               | 0.721                                                               | 0.723                                                               |
| Reference          | US FDA (Centre for Drug Eval.& Res./Off. Testing & Res.) Sept. 1997 | US FDA (Centre for Drug Eval.& Res./Off. Testing & Res.) Sept. 1997 | US FDA (Centre for Drug Eval.& Res./Off. Testing & Res.) Sept. 1997 |

## Model Applicability

Unknown features are fingerprint features in the query molecule, but not found or appearing too infrequently in the training set.

1. All properties and OPS components are within expected ranges.

## Feature Contribution

### Top features for positive contribution

| Fingerprint | Bit/Smiles  | Feature Structure                                  | Score | Multiple-Carcinogen in training set |
|-------------|-------------|----------------------------------------------------|-------|-------------------------------------|
| SCFP_8      | -1065373877 | <br><chem>[*][c]1:[*]:[c](:[*]) :n:[cH]:n:1</chem> | 0.649 | 3 out of 3                          |

|                                               |                   |                                                                                                                                                                   |              |                                            |
|-----------------------------------------------|-------------------|-------------------------------------------------------------------------------------------------------------------------------------------------------------------|--------------|--------------------------------------------|
| SCFP_8                                        | -1181430618       | <p>AND Enantiomer</p> 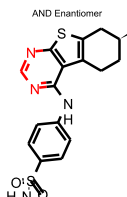 <p>[*]:n:[cH]:n:[*]</p>                                  | 0.453        | 4 out of 6                                 |
| SCFP_8                                        | -300914917        | <p>AND Enantiomer</p>  <p>[*]:[c]([*])N[c]1:[cH]:[cH]:[*]:[cH]:[cH]:[cH]:1</p> | 0.383        | 1 out of 1                                 |
| <b>Top Features for negative contribution</b> |                   |                                                                                                                                                                   |              |                                            |
| <b>Fingerprint</b>                            | <b>Bit/Smiles</b> | <b>Feature Structure</b>                                                                                                                                          | <b>Score</b> | <b>Multiple-Carcinogen in training set</b> |
| SCFP_8                                        | -1247518081       | <p>AND Enantiomer</p>  <p>NS(=O)(=O)[c]1:[cH]:[cH]:[*]:[cH]:[cH]:1</p>         | -0.737       | 0 out of 3                                 |
| SCFP_8                                        | 1892918731        | <p>AND Enantiomer</p>  <p>[*]N[c]1:[cH]:[cH]:[c]1:[cH]:[cH]:1S(=O)(=O)N</p>  | -0.546       | 0 out of 2                                 |
| SCFP_8                                        | 182991870         | <p>AND Enantiomer</p>  <p>[*]:[c]([*])S(=O)(=O)N</p>                         | -0.342       | 1 out of 5                                 |





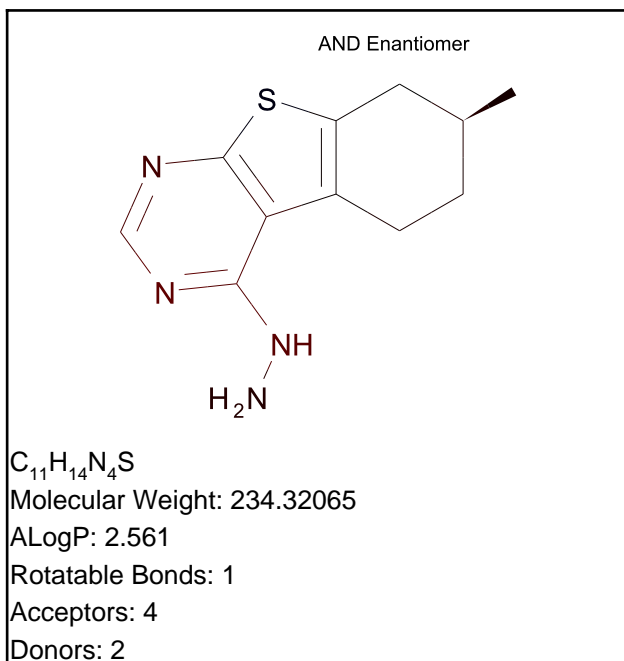

### Model Prediction

Prediction: Multiple-Carcinogen

Probability: 0.568

Enrichment: 1.37

Bayesian Score: 2.08

Mahalanobis Distance: 23.2

Mahalanobis Distance p-value: 5.29e-013

Prediction: Positive if the Bayesian score is above the estimated best cutoff value from minimizing the false positive and false negative rate.

Probability: The estimated probability that the sample is in the positive category. This assumes that the Bayesian score follows a normal distribution and is different from the prediction using a cutoff.

Enrichment: An estimate of enrichment, that is, the increased likelihood (versus random) of this sample being in the category.

Bayesian Score: The standard Laplacian-modified Bayesian score.

Mahalanobis Distance: The Mahalanobis distance (MD) is the distance to the center of the training data. The larger the MD, the less trustworthy the prediction.

Mahalanobis Distance p-value: The p-value gives the fraction of training data with an MD greater than or equal to the one for the given sample, assuming normally distributed data. The smaller the p-value, the less trustworthy the prediction. For highly non-normal X properties (e.g., fingerprints), the MD p-value is wildly inaccurate.

### Structural Similar Compounds

| Name               | Danthron                                                                            | Phenazopyridine                                                                     | Dapsone                                                                             |
|--------------------|-------------------------------------------------------------------------------------|-------------------------------------------------------------------------------------|-------------------------------------------------------------------------------------|
| Structure          | 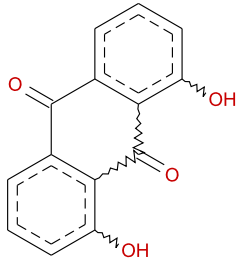 |  |  |
| Actual Endpoint    | Single-Carcinogen                                                                   | Single-Carcinogen                                                                   | Multiple-Carcinogen                                                                 |
| Predicted Endpoint | Single-Carcinogen                                                                   | Single-Carcinogen                                                                   | Multiple-Carcinogen                                                                 |
| Distance           | 0.589                                                                               | 0.591                                                                               | 0.621                                                                               |
| Reference          | US FDA (Centre for Drug Eval.& Res./Off. Testing & Res.) Sept. 1997                 | US FDA (Centre for Drug Eval.& Res./Off. Testing & Res.) Sept. 1997                 | US FDA (Centre for Drug Eval.& Res./Off. Testing & Res.) Sept. 1997                 |

### Model Applicability

Unknown features are fingerprint features in the query molecule, but not found or appearing too infrequently in the training set.

1. All properties and OPS components are within expected ranges.

### Feature Contribution

#### Top features for positive contribution

| Fingerprint | Bit/Smiles  | Feature Structure                                                                                                                                                                                                | Score | Multiple-Carcinogen in training set |
|-------------|-------------|------------------------------------------------------------------------------------------------------------------------------------------------------------------------------------------------------------------|-------|-------------------------------------|
| SCFP_8      | -1065373877 | <p style="text-align: center;">AND Enantiomer</p> 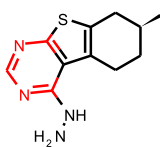 <p style="text-align: center;">[*][c]1:[*]:[c](:[*])<br/>:n:[cH]:n:1</p> | 0.649 | 3 out of 3                          |

|                                               |                   |                                                                                                                                                |              |                                            |
|-----------------------------------------------|-------------------|------------------------------------------------------------------------------------------------------------------------------------------------|--------------|--------------------------------------------|
| SCFP_8                                        | -1181430618       | <p>AND Enantiomer</p> 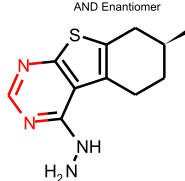 <p>[*]:n:[cH]:n:[*]</p>              | 0.453        | 4 out of 6                                 |
| SCFP_8                                        | -915345805        | <p>AND Enantiomer</p>  <p>[*]:[c]:[*])NN</p>                | 0.383        | 1 out of 1                                 |
| <b>Top Features for negative contribution</b> |                   |                                                                                                                                                |              |                                            |
| <b>Fingerprint</b>                            | <b>Bit/Smiles</b> | <b>Feature Structure</b>                                                                                                                       | <b>Score</b> | <b>Multiple-Carcinogen in training set</b> |
| SCFP_8                                        | 5                 | <p>AND Enantiomer</p>  <p>[*]N</p>                          | -0.463       | 9 out of 41                                |
| SCFP_8                                        | 803350837         | <p>AND Enantiomer</p>  <p>[*]C[c]1:s:[*]:[*]:[c]:1[*]</p>  | -0.31        | 0 out of 1                                 |
| SCFP_8                                        | 1310748454        | <p>AND Enantiomer</p>  <p>[*][c]1:[*]:[*]:[c]:[*])s:1</p> | -0.166       | 2 out of 7                                 |



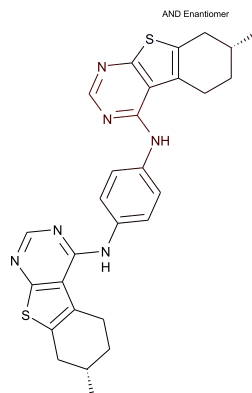

$C_{28}H_{28}N_6S_2$

Molecular Weight: 512.69212

ALogP: 7.842

Rotatable Bonds: 4

Acceptors: 6

Donors: 2

## Model Prediction

**Prediction: Multiple-Carcinogen**

Probability: 0.567

Enrichment: 1.37

Bayesian Score: 2.33

Mahalanobis Distance: 23.1

Mahalanobis Distance p-value: 6.96e-013

Prediction: Positive if the Bayesian score is above the estimated best cutoff value from minimizing the false positive and false negative rate.

Probability: The estimated probability that the sample is in the positive category. This assumes that the Bayesian score follows a normal distribution and is different from the prediction using a cutoff.

Enrichment: An estimate of enrichment, that is, the increased likelihood (versus random) of this sample being in the category.

Bayesian Score: The standard Laplacian-modified Bayesian score.

Mahalanobis Distance: The Mahalanobis distance (MD) is the distance to the center of the training data. The larger the MD, the less trustworthy the prediction.

Mahalanobis Distance p-value: The p-value gives the fraction of training data with an MD greater than or equal to the one for the given sample, assuming normally distributed data. The smaller the p-value, the less trustworthy the prediction. For highly non-normal X properties (e.g., fingerprints), the MD p-value is wildly inaccurate.

## Structural Similar Compounds

| Name               | Deserpidine                                                         | Simvastatin                                                         | Lovastatin                                                          |
|--------------------|---------------------------------------------------------------------|---------------------------------------------------------------------|---------------------------------------------------------------------|
| Structure          |                                                                     |                                                                     |                                                                     |
| Actual Endpoint    | Single-Carcinogen                                                   | Multiple-Carcinogen                                                 | Single-Carcinogen                                                   |
| Predicted Endpoint | Multiple-Carcinogen                                                 | Multiple-Carcinogen                                                 | Single-Carcinogen                                                   |
| Distance           | 0.968                                                               | 0.971                                                               | 1.006                                                               |
| Reference          | US FDA (Centre for Drug Eval.& Res./Off. Testing & Res.) Sept. 1997 | US FDA (Centre for Drug Eval.& Res./Off. Testing & Res.) Sept. 1997 | US FDA (Centre for Drug Eval.& Res./Off. Testing & Res.) Sept. 1997 |

## Model Applicability

Unknown features are fingerprint features in the query molecule, but not found or appearing too infrequently in the training set.

1. ALogP out of range. Value: 7.842. Training min, max, mean, SD: -3.329, 7.238, 2.2886, 2.006.

## Feature Contribution

### Top features for positive contribution

| Fingerprint | Bit/Smiles  | Feature Structure                        | Score | Multiple-Carcinogen in training set |
|-------------|-------------|------------------------------------------|-------|-------------------------------------|
| SCFP_8      | -1065373877 | <br>[*][c]1:[*]:[c](:[*])<br>:n:[cH]:n:1 | 0.649 | 3 out of 3                          |

|                                               |                   |                                                                   |              |                                            |
|-----------------------------------------------|-------------------|-------------------------------------------------------------------|--------------|--------------------------------------------|
| SCFP_8                                        | -1181430618       | <p>AND Enantiomer</p> <p>[*]:n:[cH]:n:[*]</p>                     | 0.453        | 4 out of 6                                 |
| SCFP_8                                        | -2147171373       | <p>AND Enantiomer</p> <p>[*]N[c]1:n:[cH]:n:[*]<br/>:[c]:1:[*]</p> | 0.383        | 1 out of 1                                 |
| <b>Top Features for negative contribution</b> |                   |                                                                   |              |                                            |
| <b>Fingerprint</b>                            | <b>Bit/Smiles</b> | <b>Feature Structure</b>                                          | <b>Score</b> | <b>Multiple-Carcinogen in training set</b> |
| SCFP_8                                        | 803350837         | <p>AND Enantiomer</p> <p>[*]C[c]1:s:[*]:[*]:[c]:1[*]</p>          | -0.31        | 0 out of 1                                 |
| SCFP_8                                        | 1310748454        | <p>AND Enantiomer</p> <p>[*][c]1:[*]:[*]:[c](:[*]):s:1</p>        | -0.166       | 2 out of 7                                 |
| SCFP_8                                        | 8                 | <p>AND Enantiomer</p> <p>[*]:n:[*]</p>                            | -0.154       | 12 out of 39                               |



# Erlotinib

# TOPKAT\_Rat\_Male\_FDA\_Single\_vs\_Multiple

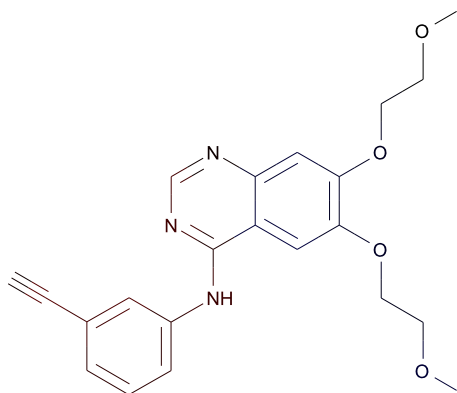

$C_{22}H_{23}N_3O_4$

Molecular Weight: 393.43572

ALogP: 4.309

Rotatable Bonds: 10

Acceptors: 7

Donors: 1

## Model Prediction

**Prediction: Multiple-Carcinogen**

Probability: 0.568

Enrichment: 1.37

Bayesian Score: 0.821

Mahalanobis Distance: 16.5

Mahalanobis Distance p-value: 4.64e-007

Prediction: Positive if the Bayesian score is above the estimated best cutoff value from minimizing the false positive and false negative rate.

Probability: The estimated probability that the sample is in the positive category. This assumes that the Bayesian score follows a normal distribution and is different from the prediction using a cutoff.

Enrichment: An estimate of enrichment, that is, the increased likelihood (versus random) of this sample being in the category.

Bayesian Score: The standard Laplacian-modified Bayesian score.

Mahalanobis Distance: The Mahalanobis distance (MD) is the distance to the center of the training data. The larger the MD, the less trustworthy the prediction.

Mahalanobis Distance p-value: The p-value gives the fraction of training data with an MD greater than or equal to the one for the given sample, assuming normally distributed data. The smaller the p-value, the less trustworthy the prediction. For highly non-normal X properties (e.g., fingerprints), the MD p-value is wildly inaccurate.

## Structural Similar Compounds

| Name               | Nicardipine                                                         | Nimodipine                                                          | Felodipine                                                          |
|--------------------|---------------------------------------------------------------------|---------------------------------------------------------------------|---------------------------------------------------------------------|
| Structure          |                                                                     |                                                                     |                                                                     |
| Actual Endpoint    | Single-Carcinogen                                                   | Single-Carcinogen                                                   | Single-Carcinogen                                                   |
| Predicted Endpoint | Single-Carcinogen                                                   | Single-Carcinogen                                                   | Single-Carcinogen                                                   |
| Distance           | 0.685                                                               | 0.700                                                               | 0.721                                                               |
| Reference          | US FDA (Centre for Drug Eval.& Res./Off. Testing & Res.) Sept. 1997 | US FDA (Centre for Drug Eval.& Res./Off. Testing & Res.) Sept. 1997 | US FDA (Centre for Drug Eval.& Res./Off. Testing & Res.) Sept. 1997 |

## Model Applicability

Unknown features are fingerprint features in the query molecule, but not found or appearing too infrequently in the training set.

1. All properties and OPS components are within expected ranges.

## Feature Contribution

### Top features for positive contribution

| Fingerprint | Bit/Smiles  | Feature Structure                        | Score | Multiple-Carcinogen in training set |
|-------------|-------------|------------------------------------------|-------|-------------------------------------|
| SCFP_8      | -1065373877 | <br>[*][c]1:[*]:[c](:[*])<br>:n:[cH]:n:1 | 0.649 | 3 out of 3                          |

|                                               |                   |                                                                                                                                                               |              |                                            |
|-----------------------------------------------|-------------------|---------------------------------------------------------------------------------------------------------------------------------------------------------------|--------------|--------------------------------------------|
| SCFP_8                                        | 2                 | 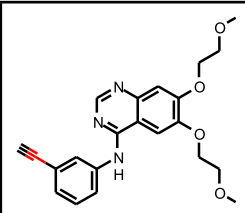<br>[*]C#[*]                                                                | 0.584        | 6 out of 8                                 |
| SCFP_8                                        | -1181430618       | <br>[*]:n:[cH]:n:[*]                                                       | 0.453        | 4 out of 6                                 |
| <b>Top Features for negative contribution</b> |                   |                                                                                                                                                               |              |                                            |
| <b>Fingerprint</b>                            | <b>Bit/Smiles</b> | <b>Feature Structure</b>                                                                                                                                      | <b>Score</b> | <b>Multiple-Carcinogen in training set</b> |
| SCFP_8                                        | 136239834         | <br>[*]OC                                                                  | -0.358       | 3 out of 13                                |
| SCFP_8                                        | 446954673         | <br>[*]CO[c]1:[cH]:[c]2:n<br>:[cH]:[*]:[c]([*]):[<br>c]:2:[cH]:[c]:1O[*] | -0.31        | 0 out of 1                                 |
| SCFP_8                                        | 949482168         | <br>[*]CCOC                                                              | -0.31        | 0 out of 1                                 |





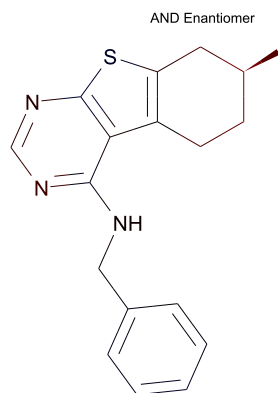

$C_{18}H_{19}N_3S$   
 Molecular Weight: 309.42856  
 ALogP: 4.678  
 Rotatable Bonds: 3  
 Acceptors: 3  
 Donors: 1

### Model Prediction

Prediction: Mild

Probability: 0.382

Enrichment: 1.04

Bayesian Score: -0.773

Mahalanobis Distance: 7.93

Mahalanobis Distance p-value: 0.808

Prediction: Positive if the Bayesian score is above the estimated best cutoff value from minimizing the false positive and false negative rate.

Probability: The estimated probability that the sample is in the positive category. This assumes that the Bayesian score follows a normal distribution and is different from the prediction using a cutoff.

Enrichment: An estimate of enrichment, that is, the increased likelihood (versus random) of this sample being in the category.

Bayesian Score: The standard Laplacian-modified Bayesian score.

Mahalanobis Distance: The Mahalanobis distance (MD) is the distance to the center of the training data. The larger the MD, the less trustworthy the prediction.

Mahalanobis Distance p-value: The p-value gives the fraction of training data with an MD greater than or equal to the one for the given sample, assuming normally distributed data. The smaller the p-value, the less trustworthy the prediction. For highly non-normal X properties (e.g., fingerprints), the MD p-value is wildly inaccurate.

### Structural Similar Compounds

| Name               | Aniline, 2,4-bis(o-methylphenoxy)-                                                                                                                | Anthraquinone, 1-(2,4,6-trimethylphenylamino)-                                                                                                                                                                   | Salicylic acid, p-tolyl ester                                                                                                                                   |
|--------------------|---------------------------------------------------------------------------------------------------------------------------------------------------|------------------------------------------------------------------------------------------------------------------------------------------------------------------------------------------------------------------|-----------------------------------------------------------------------------------------------------------------------------------------------------------------|
| Structure          |                                                                                                                                                   |                                                                                                                                                                                                                  |                                                                                                                                                                 |
| Actual Endpoint    | Mild                                                                                                                                              | Mild                                                                                                                                                                                                             | Moderate_Severe                                                                                                                                                 |
| Predicted Endpoint | Mild                                                                                                                                              | Mild                                                                                                                                                                                                             | Moderate_Severe                                                                                                                                                 |
| Distance           | 0.627                                                                                                                                             | 0.664                                                                                                                                                                                                            | 0.687                                                                                                                                                           |
| Reference          | 85JCAE "Prehled Prumyslove Toxikologie; Organicke Latky," Marhold, J., Prague, Czechoslovakia, Avicenum, 1986 Volume(issue)/page/year: -,725,1986 | 28ZPAK "Sbornik Vysledku Toxilogickeho Vysetreni Latek A Pripravku," Marhol d, J.V., Institut Pro Vychovu Vedoucicn Pracovniku Chemickeho Prumyclu Praha, Cz echoslovakia, 1972 Volume(issue)/page/year: -,242,1 | FCTOD7 Food and Chemical Toxicology. (Pergamon Press Inc., Maxwell House, Fa irview Park, Elmsford, NY 10523) V.20- 1982- Volume(issue)/page/year: 21,835 ,1983 |

### Model Applicability

Unknown features are fingerprint features in the query molecule, but not found or appearing too infrequently in the training set.

- All properties and OPS components are within expected ranges.
- Unknown FCFP\_2 feature: -1564473960: [\*]:n:[c]1:s:[\*]:[\*]:[c]:1:[\*]

### Feature Contribution

#### Top features for positive contribution

| Fingerprint | Bit/Smiles | Feature Structure | Score | Moderate_Severe in training set |
|-------------|------------|-------------------|-------|---------------------------------|
|             |            |                   |       |                                 |

|                                               |                   |                                                                                                                                                                    |              |                                        |
|-----------------------------------------------|-------------------|--------------------------------------------------------------------------------------------------------------------------------------------------------------------|--------------|----------------------------------------|
| FCFP_12                                       | -1441604640       | <p>AND Enantiomer</p> 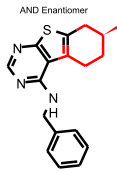 <p>[*]:[c]1:[*]C[C@@H](C)CC1</p>                         | 0.385        | 1 out of 1                             |
| FCFP_12                                       | -1731231884       | <p>AND Enantiomer</p>  <p>[*]:[c]1:[*]CC[C@H](C)C1</p>                          | 0.385        | 1 out of 1                             |
| FCFP_12                                       | 76292238          | <p>AND Enantiomer</p>  <p>[*]N[c]1:n:[cH]:n:[*]:[c]:1:[*]</p>                   | 0.385        | 1 out of 1                             |
| <b>Top Features for negative contribution</b> |                   |                                                                                                                                                                    |              |                                        |
| <b>Fingerprint</b>                            | <b>Bit/Smiles</b> | <b>Feature Structure</b>                                                                                                                                           | <b>Score</b> | <b>Moderate_Severe in training set</b> |
| FCFP_12                                       | 307419094         | <p>AND Enantiomer</p>  <p>[*][c](:[*]):[c]1:[c]([*]):[*]:[*]:[*]:[c]:1:[*]</p> | -0.915       | 2 out of 18                            |
| FCFP_12                                       | 1294255210        | <p>AND Enantiomer</p>  <p>[*]CN[c](:[*]):[*]</p>                              | -0.504       | 2 out of 11                            |

|         |    |                                                                                                                            |        |             |
|---------|----|----------------------------------------------------------------------------------------------------------------------------|--------|-------------|
| FCFP_12 | 17 | <p>AND Enantiomer</p> 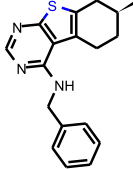 <p>[*]:s:[*]</p> | -0.332 | 8 out of 32 |
|---------|----|----------------------------------------------------------------------------------------------------------------------------|--------|-------------|

5a

TOPKAT\_Skin\_Irritancy\_None\_vs\_Irritant

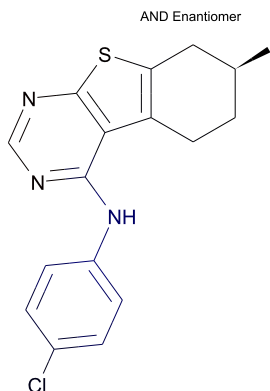C<sub>17</sub>H<sub>16</sub>ClN<sub>3</sub>S

Molecular Weight: 329.84704

ALogP: 5.5

Rotatable Bonds: 2

Acceptors: 3

Donors: 1

### Model Prediction

Prediction: Non-Irritant

Probability: 0.918

Enrichment: 0.997

Bayesian Score: -2.53

Mahalanobis Distance: 8.77

Mahalanobis Distance p-value: 0.546

Prediction: Positive if the Bayesian score is above the estimated best cutoff value from minimizing the false positive and false negative rate.

Probability: The estimated probability that the sample is in the positive category. This assumes that the Bayesian score follows a normal distribution and is different from the prediction using a cutoff.

Enrichment: An estimate of enrichment, that is, the increased likelihood (versus random) of this sample being in the category.

Bayesian Score: The standard Laplacian-modified Bayesian score.

Mahalanobis Distance: The Mahalanobis distance (MD) is the distance to the center of the training data. The larger the MD, the less trustworthy the prediction.

Mahalanobis Distance p-value: The p-value gives the fraction of training data with an MD greater than or equal to the one for the given sample, assuming normally distributed data. The smaller the p-value, the less trustworthy the prediction. For highly non-normal X properties (e.g., fingerprints), the MD p-value is wildly inaccurate.

### Structural Similar Compounds

| Name               | Anthraquinone, 1-(2,4,6-trimethylphenylamino)-                                                                                                                                                                        | s-Triazine, 2,4-dichloro-6-(o-chloroanilino)- | Aniline, 2,4-bis(o-methylphenoxy)-                                                                                                                    |
|--------------------|-----------------------------------------------------------------------------------------------------------------------------------------------------------------------------------------------------------------------|-----------------------------------------------|-------------------------------------------------------------------------------------------------------------------------------------------------------|
| Structure          |                                                                                                                                                                                                                       |                                               |                                                                                                                                                       |
| Actual Endpoint    | Irritant                                                                                                                                                                                                              | Irritant                                      | Irritant                                                                                                                                              |
| Predicted Endpoint | Non-Irritant                                                                                                                                                                                                          | Non-Irritant                                  | Non-Irritant                                                                                                                                          |
| Distance           | 0.622                                                                                                                                                                                                                 | 0.640                                         | 0.655                                                                                                                                                 |
| Reference          | 28ZPAK "Sbornik Vysledku Toxikologickeho Vysetreni Latek A Pripravku," Marhol d, J.V., Institut Pro Vychovu Vedoucicn Pracovniku Chemickeho Prumyclu Praha, Cz echoslovakia, 1972<br>Volume(issue)/page/year: -,242,1 | 34ZIAG* -,235,69                              | 85JCAE "Prehled Prumyslove Toxikologie; Organicke Latky," Marhold, J., Prague , Czechoslovakia, Avicenum, 1986<br>Volume(issue)/page/year: -,725,1986 |

### Model Applicability

Unknown features are fingerprint features in the query molecule, but not found or appearing too infrequently in the training set.

1. All properties and OPS components are within expected ranges.

### Feature Contribution

#### Top features for positive contribution

| Fingerprint | Bit/Smiles | Feature Structure | Score | Irritant in training set |
|-------------|------------|-------------------|-------|--------------------------|
|             |            |                   |       |                          |

|                                               |                   |                                                                                                                                                                |              |                                 |
|-----------------------------------------------|-------------------|----------------------------------------------------------------------------------------------------------------------------------------------------------------|--------------|---------------------------------|
| FCFP_12                                       | -1539132615       | <p>AND Enantiomer</p> 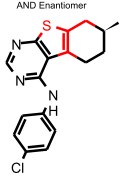 <p>[*]C[c]1:s:[*]:[*]:[c]:1[*]</p>                   | 0.0795       | 9 out of 9                      |
| FCFP_12                                       | -124685461        | <p>AND Enantiomer</p>  <p>[*]:n:[cH]:n:[*]</p>                              | 0.0734       | 5 out of 5                      |
| FCFP_12                                       | -475316933        | <p>AND Enantiomer</p>  <p>[*][c]1:[*]:[c](:[*]):n:[cH]:n:1</p>              | 0.0703       | 4 out of 4                      |
| <b>Top Features for negative contribution</b> |                   |                                                                                                                                                                |              |                                 |
| <b>Fingerprint</b>                            | <b>Bit/Smiles</b> | <b>Feature Structure</b>                                                                                                                                       | <b>Score</b> | <b>Irritant in training set</b> |
| FCFP_12                                       | 839741273         | <p>AND Enantiomer</p>  <p>[*]:[c](:[*])N[c]1:[cH]:[cH]:[*]:[cH]:[cH]:1</p> | -0.708       | 4 out of 10                     |
| FCFP_12                                       | -773983804        | <p>AND Enantiomer</p>  <p>[*]N[c]1:[cH]:[*]:[c]([*]):[cH]:[cH]:1</p>      | -0.444       | 46 out of 79                    |

|         |           |                                                                                                                                                                                |        |              |
|---------|-----------|--------------------------------------------------------------------------------------------------------------------------------------------------------------------------------|--------|--------------|
| FCFP_12 | 590925877 | <p>AND Enantiomer</p> 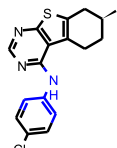 <p><chem>[*]N(c1ccccc1Cl):[*]:[c2ccccc2N3C=NC=C3S4CCCCC4]</chem></p> | -0.434 | 56 out of 95 |
|---------|-----------|--------------------------------------------------------------------------------------------------------------------------------------------------------------------------------|--------|--------------|

5b

TOPKAT\_Skin\_Irritancy\_None\_vs\_Irritant

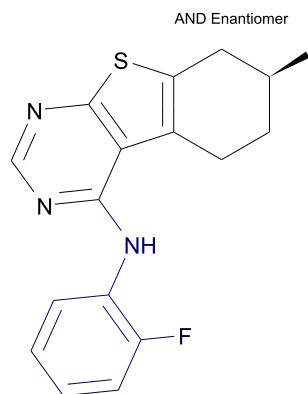

$C_{17}H_{16}FN_3S$   
 Molecular Weight: 313.39244  
 ALogP: 5.041  
 Rotatable Bonds: 2  
 Acceptors: 3  
 Donors: 1

### Model Prediction

Prediction: Non-Irritant

Probability: 0.895

Enrichment: 0.971

Bayesian Score: -2.82

Mahalanobis Distance: 8.71

Mahalanobis Distance p-value: 0.58

Prediction: Positive if the Bayesian score is above the estimated best cutoff value from minimizing the false positive and false negative rate.

Probability: The estimated probability that the sample is in the positive category. This assumes that the Bayesian score follows a normal distribution and is different from the prediction using a cutoff.

Enrichment: An estimate of enrichment, that is, the increased likelihood (versus random) of this sample being in the category.

Bayesian Score: The standard Laplacian-modified Bayesian score.

Mahalanobis Distance: The Mahalanobis distance (MD) is the distance to the center of the training data. The larger the MD, the less trustworthy the prediction.

Mahalanobis Distance p-value: The p-value gives the fraction of training data with an MD greater than or equal to the one for the given sample, assuming normally distributed data. The smaller the p-value, the less trustworthy the prediction. For highly non-normal X properties (e.g., fingerprints), the MD p-value is wildly inaccurate.

### Structural Similar Compounds

| Name               | s-Triazine, 2,4-dichloro-6-(o-chloroanilino)- | Anthraquinone, 1-(2,4,6-trimethylphenylamino)-                                                                                                                                                                      | Aniline, 2,4-bis(o-methylphenoxy)-                                                                                                                   |
|--------------------|-----------------------------------------------|---------------------------------------------------------------------------------------------------------------------------------------------------------------------------------------------------------------------|------------------------------------------------------------------------------------------------------------------------------------------------------|
| Structure          |                                               |                                                                                                                                                                                                                     |                                                                                                                                                      |
| Actual Endpoint    | Irritant                                      | Irritant                                                                                                                                                                                                            | Irritant                                                                                                                                             |
| Predicted Endpoint | Non-Irritant                                  | Non-Irritant                                                                                                                                                                                                        | Non-Irritant                                                                                                                                         |
| Distance           | 0.560                                         | 0.644                                                                                                                                                                                                               | 0.646                                                                                                                                                |
| Reference          | 34ZIAG* -,235,69                              | 28ZPAK "Sbornik Vysledku Toxologickeho Vysetreni Latek A Pripravku," Marhol d, J.V., Institut Pro Vychovu Vedoucicn Pracovniku Chemickeho Prumyclu Praha, Cz echoslovakia, 1972<br>Volume(issue)/page/year: -,242,1 | 85JCAE "Prehled Prumyslove Toxikologie; Organicke Latky," Marhold, J., Prague, Czechoslovakia, Avicenum, 1986<br>Volume(issue)/page/year: -,725,1986 |

### Model Applicability

Unknown features are fingerprint features in the query molecule, but not found or appearing too infrequently in the training set.

1. All properties and OPS components are within expected ranges.

### Feature Contribution

#### Top features for positive contribution

| Fingerprint | Bit/Smiles | Feature Structure | Score | Irritant in training set |
|-------------|------------|-------------------|-------|--------------------------|
|             |            |                   |       |                          |



|                                               |                   |                                                                                                                                                          |              |                                 |
|-----------------------------------------------|-------------------|----------------------------------------------------------------------------------------------------------------------------------------------------------|--------------|---------------------------------|
| FCFP_12                                       | -1539132615       | <p>AND Enantiomer</p> 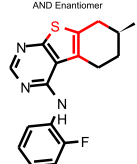 <p>[*]C[c]1:s:[*]:[*]:[c]:1[*]</p>             | 0.0795       | 9 out of 9                      |
| FCFP_12                                       | -124685461        | <p>AND Enantiomer</p>  <p>[*]:n:[cH]:n:[*]</p>                        | 0.0734       | 5 out of 5                      |
| FCFP_12                                       | -475316933        | <p>AND Enantiomer</p>  <p>[*][c]1:[*]:[c](:[*]):n:[cH]:n:1</p>        | 0.0703       | 4 out of 4                      |
| <b>Top Features for negative contribution</b> |                   |                                                                                                                                                          |              |                                 |
| <b>Fingerprint</b>                            | <b>Bit/Smiles</b> | <b>Feature Structure</b>                                                                                                                                 | <b>Score</b> | <b>Irritant in training set</b> |
| FCFP_12                                       | 1783756416        | <p>AND Enantiomer</p>  <p>[*]N[c]1:[cH]:[*]:[cH]:[cH]:[c]:1F</p>     | -0.509       | 4 out of 8                      |
| FCFP_12                                       | -1724769936       | <p>AND Enantiomer</p>  <p>[*]N[c]1:[cH]:[cH]:[cH]:[cH]:[c]:1[*]</p> | -0.475       | 11 out of 20                    |

|         |            |                                                                                                                                                              |        |              |
|---------|------------|--------------------------------------------------------------------------------------------------------------------------------------------------------------|--------|--------------|
| FCFP_12 | -773983804 | <p>AND Enantiomer</p> 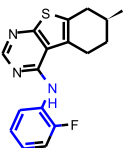 <p>[*]N[c]1:[cH]:[*]:[c]<br/>([*]):[cH]:[cH]:1</p> | -0.444 | 46 out of 79 |
|---------|------------|--------------------------------------------------------------------------------------------------------------------------------------------------------------|--------|--------------|

5c

TOPKAT\_Skin\_Irritancy\_None\_vs\_Irritant

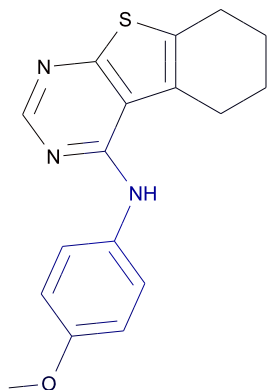C<sub>17</sub>H<sub>17</sub>N<sub>3</sub>OS

Molecular Weight: 311.40138

ALogP: 4.568

Rotatable Bonds: 3

Acceptors: 4

Donors: 1

### Model Prediction

Prediction: Non-Irritant

Probability: 0.709

Enrichment: 0.769

Bayesian Score: -3.91

Mahalanobis Distance: 7.41

Mahalanobis Distance p-value: 0.98

Prediction: Positive if the Bayesian score is above the estimated best cutoff value from minimizing the false positive and false negative rate.

Probability: The estimated probability that the sample is in the positive category. This assumes that the Bayesian score follows a normal distribution and is different from the prediction using a cutoff.

Enrichment: An estimate of enrichment, that is, the increased likelihood (versus random) of this sample being in the category.

Bayesian Score: The standard Laplacian-modified Bayesian score.

Mahalanobis Distance: The Mahalanobis distance (MD) is the distance to the center of the training data. The larger the MD, the less trustworthy the prediction.

Mahalanobis Distance p-value: The p-value gives the fraction of training data with an MD greater than or equal to the one for the given sample, assuming normally distributed data. The smaller the p-value, the less trustworthy the prediction. For highly non-normal X properties (e.g., fingerprints), the MD p-value is wildly inaccurate.

### Structural Similar Compounds

| Name               | s-Triazine, 2,4-dichloro-6-(o-chloroanilino)- | Benzoic acid, 5-(chlorosulfonyl)-2,4-dichloro-                                                                                                                 | Aniline, 2,4-bis(o-methylphenoxy)-                                                                                                                 |
|--------------------|-----------------------------------------------|----------------------------------------------------------------------------------------------------------------------------------------------------------------|----------------------------------------------------------------------------------------------------------------------------------------------------|
| Structure          |                                               |                                                                                                                                                                |                                                                                                                                                    |
| Actual Endpoint    | Irritant                                      | Irritant                                                                                                                                                       | Irritant                                                                                                                                           |
| Predicted Endpoint | Non-Irritant                                  | Non-Irritant                                                                                                                                                   | Non-Irritant                                                                                                                                       |
| Distance           | 0.627                                         | 0.701                                                                                                                                                          | 0.705                                                                                                                                              |
| Reference          | 34ZIAG* -,235,69                              | FCTOD7 Food and Chemical Toxicology. (Pergamon Press Inc., Maxwell House, Fairview Park, Elmsford, NY 10523) V.20- 1982- Volume(issue)/page/year: 20,563 ,1982 | 85JCAE "Prehled Prumyslove Toxikologie; Organické Latky," Marhold, J., Prague , Czechoslovakia, Avicenum, 1986 Volume(issue)/page/year: -,725,1986 |

### Model Applicability

Unknown features are fingerprint features in the query molecule, but not found or appearing too infrequently in the training set.

1. All properties and OPS components are within expected ranges.

### Feature Contribution

#### Top features for positive contribution

| Fingerprint | Bit/Smiles | Feature Structure | Score | Irritant in training set |
|-------------|------------|-------------------|-------|--------------------------|
|             |            |                   |       |                          |

|                                               |                   |                                                                                                                                             |              |                                 |
|-----------------------------------------------|-------------------|---------------------------------------------------------------------------------------------------------------------------------------------|--------------|---------------------------------|
| FCFP_12                                       | -1539132615       | 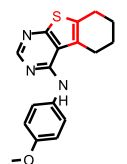<br>[*]C[c]1:s:[*]:[*]:[c]:1[*]                          | 0.0795       | 9 out of 9                      |
| FCFP_12                                       | -124685461        | <br>[*]:n:[cH]:n:[*]                                     | 0.0734       | 5 out of 5                      |
| FCFP_12                                       | -475316933        | <br>[*][c]1:[*]:[c](:[*]):n:[cH]:n:1                     | 0.0703       | 4 out of 4                      |
| <b>Top Features for negative contribution</b> |                   |                                                                                                                                             |              |                                 |
| <b>Fingerprint</b>                            | <b>Bit/Smiles</b> | <b>Feature Structure</b>                                                                                                                    | <b>Score</b> | <b>Irritant in training set</b> |
| FCFP_12                                       | 839741273         | <br>[*]:[c](:[*])N[c]1:[cH]:[cH]:[*]:[cH]:[cH]:1        | -0.708       | 4 out of 10                     |
| FCFP_12                                       | 414792462         | <br>[*]O[c]1:[cH]:[cH]:[c](N[e](:[*]):[*]):[cH]:[cH]:1 | -0.65        | 0 out of 1                      |

|         |            |                                                                                                                                   |        |              |
|---------|------------|-----------------------------------------------------------------------------------------------------------------------------------|--------|--------------|
| FCFP_12 | -773983804 | 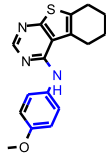<br>[*]N[c]1:[cH]:[*]:[c]<br>([*]):[cH]:[cH]:1 | -0.444 | 46 out of 79 |
|---------|------------|-----------------------------------------------------------------------------------------------------------------------------------|--------|--------------|

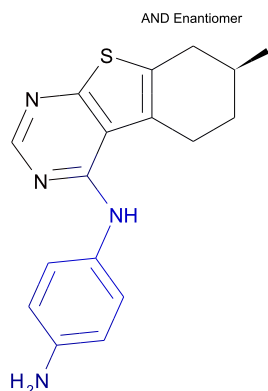

$C_{17}H_{18}N_4S$

Molecular Weight: 310.41662

ALogP: 4.089

Rotatable Bonds: 2

Acceptors: 4

Donors: 2

## Model Prediction

Prediction: Non-Irritant

Probability: 0.183

Enrichment: 0.199

Bayesian Score: -5.47

Mahalanobis Distance: 8.06

Mahalanobis Distance p-value: 0.867

Prediction: Positive if the Bayesian score is above the estimated best cutoff value from minimizing the false positive and false negative rate.

Probability: The estimated probability that the sample is in the positive category. This assumes that the Bayesian score follows a normal distribution and is different from the prediction using a cutoff.

Enrichment: An estimate of enrichment, that is, the increased likelihood (versus random) of this sample being in the category. Bayesian Score: The standard Laplacian-modified Bayesian score.

Mahalanobis Distance: The Mahalanobis distance (MD) is the distance to the center of the training data. The larger the MD, the less trustworthy the prediction.

Mahalanobis Distance p-value: The p-value gives the fraction of training data with an MD greater than or equal to the one for the given sample, assuming normally distributed data. The smaller the p-value, the less trustworthy the prediction. For highly non-normal X properties (e.g., fingerprints), the MD p-value is wildly inaccurate.

## Structural Similar Compounds

| Name               | 1-Amino-2-bromo-4-hydroxyanthraquinone | 1-Amino-4-hydroxy-5-chloroanthraquinone | Phenol, 4,4'-sulfonyldi-                                                                                                                             |
|--------------------|----------------------------------------|-----------------------------------------|------------------------------------------------------------------------------------------------------------------------------------------------------|
| Structure          |                                        |                                         |                                                                                                                                                      |
| Actual Endpoint    | Non-Irritant                           | Non-Irritant                            | Irritant                                                                                                                                             |
| Predicted Endpoint | Non-Irritant                           | Non-Irritant                            | Non-Irritant                                                                                                                                         |
| Distance           | 0.650                                  | 0.669                                   | 0.696                                                                                                                                                |
| Reference          | 28ZPAK -,83,72                         | 28ZPAK -,83,72                          | BIOFX* BIOFAX Industrial Bio-Test Laboratories, Inc., Data Sheets. (1810 Frontage Rd., Northbrook, IL 60062) Volume(issue)/page/year: 601-05501,1974 |

## Model Applicability

Unknown features are fingerprint features in the query molecule, but not found or appearing too infrequently in the training set.

- All properties and OPS components are within expected ranges.

## Feature Contribution

### Top features for positive contribution

| Fingerprint | Bit/Smiles  | Feature Structure                            | Score  | Irritant in training set |
|-------------|-------------|----------------------------------------------|--------|--------------------------|
| FCFP_12     | -1539132615 | <br><chem>[*]C[c]1:s:[*]:[*]:[c]:1[*]</chem> | 0.0795 | 9 out of 9               |

|                                               |                   |                                                                                                                                                                             |              |                                 |
|-----------------------------------------------|-------------------|-----------------------------------------------------------------------------------------------------------------------------------------------------------------------------|--------------|---------------------------------|
| FCFP_12                                       | -124685461        | <p>AND Enantiomer</p> 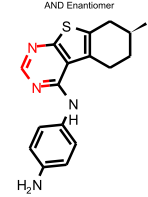 <p>[*]:n:[cH]:n:[*]</p>                                           | 0.0734       | 5 out of 5                      |
| FCFP_12                                       | -475316933        | <p>AND Enantiomer</p>  <p>[*][c]1:[*]:[c](:[*])<br/>:n:[cH]:n:1</p>                      | 0.0703       | 4 out of 4                      |
| <b>Top Features for negative contribution</b> |                   |                                                                                                                                                                             |              |                                 |
| <b>Fingerprint</b>                            | <b>Bit/Smiles</b> | <b>Feature Structure</b>                                                                                                                                                    | <b>Score</b> | <b>Irritant in training set</b> |
| FCFP_12                                       | -970693500        | <p>AND Enantiomer</p>  <p>[*]N[c]1:[cH]:[cH]:[c<br/>(N):[cH]:[cH]:1</p>                  | -1.04        | 0 out of 2                      |
| FCFP_12                                       | -200702388        | <p>AND Enantiomer</p>  <p>[*]:[c](:[*])N[c]1:[c<br/>H]:[cH]:[c](N):[cH]:<br/>[cH]:1</p> | -0.846       | 1 out of 4                      |
| FCFP_12                                       | 839741273         | <p>AND Enantiomer</p>  <p>[*]:[c](:[*])N[c]1:[c<br/>H]:[cH]:[*]:[cH]:[cH<br/>]:1</p>   | -0.708       | 4 out of 10                     |

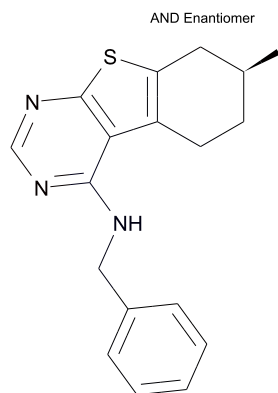

$C_{18}H_{19}N_3S$

Molecular Weight: 309.42856

ALogP: 4.678

Rotatable Bonds: 3

Acceptors: 3

Donors: 1

## Model Prediction

**Prediction: Irritant**

Probability: 0.974

Enrichment: 1.06

Bayesian Score: -0.706

Mahalanobis Distance: 7.74

Mahalanobis Distance p-value: 0.942

Prediction: Positive if the Bayesian score is above the estimated best cutoff value from minimizing the false positive and false negative rate.

Probability: The estimated probability that the sample is in the positive category. This assumes that the Bayesian score follows a normal distribution and is different from the prediction using a cutoff.

Enrichment: An estimate of enrichment, that is, the increased likelihood (versus random) of this sample being in the category.

Bayesian Score: The standard Laplacian-modified Bayesian score.

Mahalanobis Distance: The Mahalanobis distance (MD) is the distance to the center of the training data. The larger the MD, the less trustworthy the prediction.

Mahalanobis Distance p-value: The p-value gives the fraction of training data with an MD greater than or equal to the one for the given sample, assuming normally distributed data. The smaller the p-value, the less trustworthy the prediction. For highly non-normal X properties (e.g., fingerprints), the MD p-value is wildly inaccurate.

## Structural Similar Compounds

| Name               | s-Triazine, 2,4-dichloro-6-(o-chloroanilino)- | Aniline, 2,4-bis(o-methylphenoxy)-                                                                                                                   | Anthraquinone, 1-(2,4,6-trimethylphenylamino)-                                                                                                                                                                        |
|--------------------|-----------------------------------------------|------------------------------------------------------------------------------------------------------------------------------------------------------|-----------------------------------------------------------------------------------------------------------------------------------------------------------------------------------------------------------------------|
| Structure          |                                               |                                                                                                                                                      |                                                                                                                                                                                                                       |
| Actual Endpoint    | Irritant                                      | Irritant                                                                                                                                             | Irritant                                                                                                                                                                                                              |
| Predicted Endpoint | Non-Irritant                                  | Non-Irritant                                                                                                                                         | Non-Irritant                                                                                                                                                                                                          |
| Distance           | 0.626                                         | 0.630                                                                                                                                                | 0.668                                                                                                                                                                                                                 |
| Reference          | 34ZIAG* -,235,69                              | 85JCAE "Prehled Prumyslove Toxikologie; Organicke Latky," Marhold, J., Prague, Czechoslovakia, Avicenum, 1986<br>Volume(issue)/page/year: -,725,1986 | 28ZPAK "Sbornik Vysledku Toxikologickeho Vysetreni Latek A Pripravku," Marhol d, J.V., Institut Pro Vychovu Vedoucicn Pracovniku Chemickeho Prumyclu Praha, Cz echoslovakia, 1972<br>Volume(issue)/page/year: -,242,1 |

## Model Applicability

Unknown features are fingerprint features in the query molecule, but not found or appearing too infrequently in the training set.

1. All properties and OPS components are within expected ranges.

## Feature Contribution

### Top features for positive contribution

| Fingerprint | Bit/Smiles | Feature Structure | Score | Irritant in training set |
|-------------|------------|-------------------|-------|--------------------------|
|             |            |                   |       |                          |



|                                               |                   |                                                                                                                                                                   |              |                                 |
|-----------------------------------------------|-------------------|-------------------------------------------------------------------------------------------------------------------------------------------------------------------|--------------|---------------------------------|
| FCFP_12                                       | 1539132615        | <p>AND Enantiomer</p> 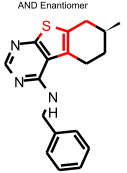 <p><chem>[*]C[c]1:s:[*]:[*]:[c]:1[*]</chem></p>         | 0.0795       | 9 out of 9                      |
| FCFP_12                                       | 907096426         | <p>AND Enantiomer</p>  <p><chem>[*]NC[c](:[*]):[*]</chem></p>                  | 0.0772       | 7 out of 7                      |
| FCFP_12                                       | 427906732         | <p>AND Enantiomer</p>  <p><chem>[*]NC[c]1:[cH]:[cH]:[*]:[cH]:[cH]:1</chem></p> | 0.0756       | 6 out of 6                      |
| <b>Top Features for negative contribution</b> |                   |                                                                                                                                                                   |              |                                 |
| <b>Fingerprint</b>                            | <b>Bit/Smiles</b> | <b>Feature Structure</b>                                                                                                                                          | <b>Score</b> | <b>Irritant in training set</b> |
| FCFP_12                                       | 1294255210        | <p>AND Enantiomer</p>  <p><chem>[*]CN[c](:[*]):[*]</chem></p>                 | -0.486       | 12 out of 22                    |
| FCFP_12                                       | 1618154665        | <p>AND Enantiomer</p>  <p><chem>[*][c](:[*]):[cH]:[cH]:[*]</chem></p>        | -0.0845      | 412 out of 490                  |

|         |    |                                                                                                                                                                                  |         |                |
|---------|----|----------------------------------------------------------------------------------------------------------------------------------------------------------------------------------|---------|----------------|
| FCFP_12 | 16 | <p>AND Enantiomer</p> 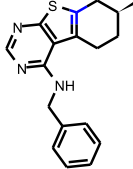 <p><chem>C1CCN(C1)c2ncnc2NCc3ccccc3</chem></p> <p>[*][c](:[*]):[*]</p> | -0.0843 | 423 out of 503 |
|---------|----|----------------------------------------------------------------------------------------------------------------------------------------------------------------------------------|---------|----------------|

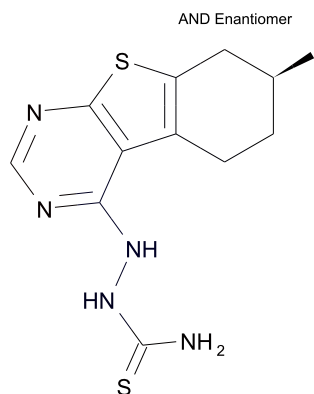

$C_{12}H_{15}N_5S_2$

Molecular Weight: 293.411

ALogP: 3.209

Rotatable Bonds: 3

Acceptors: 4

Donors: 3

## Model Prediction

Prediction: Non-Irritant

Probability: 0.966

Enrichment: 1.05

Bayesian Score: -1.27

Mahalanobis Distance: 8.34

Mahalanobis Distance p-value: 0.763

Prediction: Positive if the Bayesian score is above the estimated best cutoff value from minimizing the false positive and false negative rate.

Probability: The estimated probability that the sample is in the positive category. This assumes that the Bayesian score follows a normal distribution and is different from the prediction using a cutoff.

Enrichment: An estimate of enrichment, that is, the increased likelihood (versus random) of this sample being in the category.

Bayesian Score: The standard Laplacian-modified Bayesian score.

Mahalanobis Distance: The Mahalanobis distance (MD) is the distance to the center of the training data. The larger the MD, the less trustworthy the prediction.

Mahalanobis Distance p-value: The p-value gives the fraction of training data with an MD greater than or equal to the one for the given sample, assuming normally distributed data. The smaller the p-value, the less trustworthy the prediction. For highly non-normal X properties (e.g., fingerprints), the MD p-value is wildly inaccurate.

## Structural Similar Compounds

| Name               | Benzenesulfonic acid, 2-anilino-5-nitro-                                                                                                           | 8-Methylamino-4-hydroxy-2-naphthalene sulfonic acid | Aniline, 2,2-dithiobis- |
|--------------------|----------------------------------------------------------------------------------------------------------------------------------------------------|-----------------------------------------------------|-------------------------|
| Structure          |                                                                                                                                                    |                                                     |                         |
| Actual Endpoint    | Irritant                                                                                                                                           | Non-Irritant                                        | Non-Irritant            |
| Predicted Endpoint | Non-Irritant                                                                                                                                       | Non-Irritant                                        | Non-Irritant            |
| Distance           | 0.770                                                                                                                                              | 0.772                                               | 0.781                   |
| Reference          | 85JCAE "Prehled Prumyslove Toxikologie; Organicke Latky," Marhold, J., Prague, Czechoslovakia, Avicenum, 1986 Volume(issue)/page/year: -,1061,1986 | 28ZPAK -,190,72                                     | 28ZPAK -,512,72         |

## Model Applicability

Unknown features are fingerprint features in the query molecule, but not found or appearing too infrequently in the training set.

1. All properties and OPS components are within expected ranges.

## Feature Contribution

### Top features for positive contribution

| Fingerprint | Bit/Smiles | Feature Structure | Score | Irritant in training set |
|-------------|------------|-------------------|-------|--------------------------|
|             |            |                   |       |                          |

|                                               |                   |                                                                                                                                                                |              |                                 |
|-----------------------------------------------|-------------------|----------------------------------------------------------------------------------------------------------------------------------------------------------------|--------------|---------------------------------|
| FCFP_12                                       | -1539132615       | <p>AND Enantiomer</p> 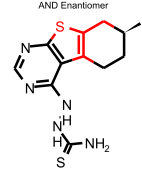 <p><chem>[*]C[c]1:s:[*]:[*]:[c]:1[*]</chem></p>      | 0.0795       | 9 out of 9                      |
| FCFP_12                                       | -124685461        | <p>AND Enantiomer</p>  <p><chem>[*]:n:[cH]:n:[*]</chem></p>                 | 0.0734       | 5 out of 5                      |
| FCFP_12                                       | -475316933        | <p>AND Enantiomer</p>  <p><chem>[*][c]1:[*]:[c](:[*]):n:[cH]:n:1</chem></p> | 0.0703       | 4 out of 4                      |
| <b>Top Features for negative contribution</b> |                   |                                                                                                                                                                |              |                                 |
| <b>Fingerprint</b>                            | <b>Bit/Smiles</b> | <b>Feature Structure</b>                                                                                                                                       | <b>Score</b> | <b>Irritant in training set</b> |
| FCFP_12                                       | 1294344583        | <p>AND Enantiomer</p>  <p><chem>[*]NN[c](:[*]):[*]</chem></p>              | -0.65        | 0 out of 1                      |
| FCFP_12                                       | 16                | <p>AND Enantiomer</p>  <p><chem>[*][c](:[*]):[*]</chem></p>               | -0.0843      | 423 out of 503                  |

|         |   |                                                                                                                          |         |                |
|---------|---|--------------------------------------------------------------------------------------------------------------------------|---------|----------------|
| FCFP_12 | 3 | <p>AND Enantiomer</p> 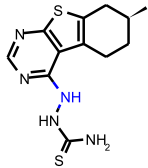 <p>[*]N[*]</p> | -0.0812 | 291 out of 345 |
|---------|---|--------------------------------------------------------------------------------------------------------------------------|---------|----------------|

9a

TOPKAT\_Skin\_Irritancy\_None\_vs\_Irritant

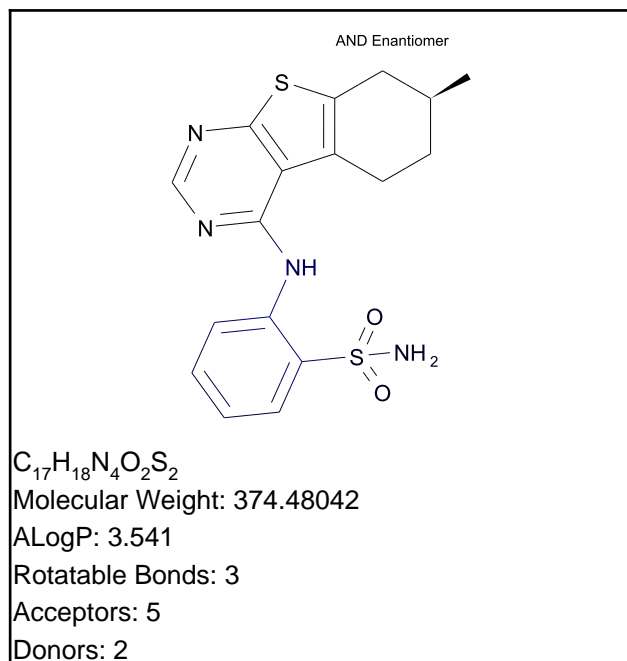**Model Prediction**

Prediction: Non-Irritant

Probability: 0.866

Enrichment: 0.94

Bayesian Score: -3.08

Mahalanobis Distance: 7.74

Mahalanobis Distance p-value: 0.942

Prediction: Positive if the Bayesian score is above the estimated best cutoff value from minimizing the false positive and false negative rate.

Probability: The estimated probability that the sample is in the positive category. This assumes that the Bayesian score follows a normal distribution and is different from the prediction using a cutoff.

Enrichment: An estimate of enrichment, that is, the increased likelihood (versus random) of this sample being in the category.

Bayesian Score: The standard Laplacian-modified Bayesian score.

Mahalanobis Distance: The Mahalanobis distance (MD) is the distance to the center of the training data. The larger the MD, the less trustworthy the prediction.

Mahalanobis Distance p-value: The p-value gives the fraction of training data with an MD greater than or equal to the one for the given sample, assuming normally distributed data. The smaller the p-value, the less trustworthy the prediction. For highly non-normal X properties (e.g., fingerprints), the MD p-value is wildly inaccurate.

**Structural Similar Compounds**

| Name               | Benzenesulfonic acid, 2-anilino-5-nitro-                                                                                                           | 2-Anthracenesulfonic acid, 1-amino-9,10-dihydro-9,10-dioxo-4-(2,4,6-trimethylanilino)-, monosodium salt                                            | Urea, 1,3-bis(2-benzothiazolythiomethyl)-                                                                                                                                      |
|--------------------|----------------------------------------------------------------------------------------------------------------------------------------------------|----------------------------------------------------------------------------------------------------------------------------------------------------|--------------------------------------------------------------------------------------------------------------------------------------------------------------------------------|
| Structure          |                                                                                                                                                    |                                                                                                                                                    |                                                                                                                                                                                |
| Actual Endpoint    | Irritant                                                                                                                                           | Irritant                                                                                                                                           | Irritant                                                                                                                                                                       |
| Predicted Endpoint | Non-Irritant                                                                                                                                       | Non-Irritant                                                                                                                                       | Irritant                                                                                                                                                                       |
| Distance           | 0.657                                                                                                                                              | 0.728                                                                                                                                              | 0.769                                                                                                                                                                          |
| Reference          | 85JCAE "Prehled Prumyslove Toxikologie; Organicke Latky," Marhold, J., Prague, Czechoslovakia, Avicenum, 1986 Volume(issue)/page/year: -,1061,1986 | 85JCAE "Prehled Prumyslove Toxikologie; Organicke Latky," Marhold, J., Prague, Czechoslovakia, Avicenum, 1986 Volume(issue)/page/year: -,1327,1986 | AMIHBC AMA Archives of Industrial Hygiene and Occupational Medicine. (Chicago, IL) V.2-10, 1950-54. For publisher information, see AEHLAU. Volume(issue)/page/year: 5,311,1952 |

**Model Applicability**

Unknown features are fingerprint features in the query molecule, but not found or appearing too infrequently in the training set.

- All properties and OPS components are within expected ranges.

**Feature Contribution****Top features for positive contribution**

| Fingerprint | Bit/Smiles | Feature Structure | Score | Irritant in training set |
|-------------|------------|-------------------|-------|--------------------------|
|-------------|------------|-------------------|-------|--------------------------|

|                                               |                   |                                                                                                                                                                              |              |                                 |
|-----------------------------------------------|-------------------|------------------------------------------------------------------------------------------------------------------------------------------------------------------------------|--------------|---------------------------------|
| FCFP_12                                       | -1539132615       | <p>AND Enantiomer</p> 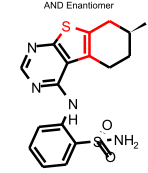 <p>[*]C[c]1:s:[*]:[*]:[c]:1[*]</p>                                 | 0.0795       | 9 out of 9                      |
| FCFP_12                                       | -605671248        | <p>AND Enantiomer</p>  <p>[*]S(=[*])(=[*])[c]1:[cH]:[*]:[cH]:[cH]:[c]:1N[c](:[*]):[*]</p> | 0.0772       | 7 out of 7                      |
| FCFP_12                                       | -124685461        | <p>AND Enantiomer</p>  <p>[*]:n:[cH]:n:[*]</p>                                            | 0.0734       | 5 out of 5                      |
| <b>Top Features for negative contribution</b> |                   |                                                                                                                                                                              |              |                                 |
| <b>Fingerprint</b>                            | <b>Bit/Smiles</b> | <b>Feature Structure</b>                                                                                                                                                     | <b>Score</b> | <b>Irritant in training set</b> |
| FCFP_12                                       | -1724769936       | <p>AND Enantiomer</p>  <p>[*]N[c]1:[cH]:[cH]:[cH]:[cH]:[c]:1[*]</p>                      | -0.475       | 11 out of 20                    |
| FCFP_12                                       | -773983804        | <p>AND Enantiomer</p>  <p>[*]N[c]1:[cH]:[*]:[c]([*]):[cH]:[cH]:1</p>                    | -0.444       | 46 out of 79                    |

|         |           |                                                                                                                                                                                                        |        |              |
|---------|-----------|--------------------------------------------------------------------------------------------------------------------------------------------------------------------------------------------------------|--------|--------------|
| FCFP_12 | 590925877 | <p>AND Enantiomer</p> 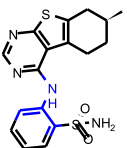 <p><chem>Nc1ccc(cc1)Nc2nc3c(ncn3)C4CCCCC4</chem></p> <p>[*]N[c](:[cH];[*]):[c<br/>H]:[*]</p> | -0.434 | 56 out of 95 |
|---------|-----------|--------------------------------------------------------------------------------------------------------------------------------------------------------------------------------------------------------|--------|--------------|



9b

TOPKAT\_Skin\_Irritancy\_None\_vs\_Irritant

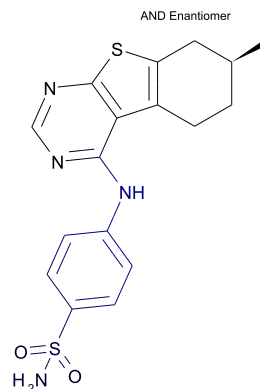
 $C_{17}H_{18}N_4O_2S_2$ 

Molecular Weight: 374.48042

ALogP: 3.541

Rotatable Bonds: 3

Acceptors: 5

Donors: 2

## Model Prediction

Prediction: Non-Irritant

Probability: 0.663

Enrichment: 0.719

Bayesian Score: -4.07

Mahalanobis Distance: 7.74

Mahalanobis Distance p-value: 0.942

Prediction: Positive if the Bayesian score is above the estimated best cutoff value from minimizing the false positive and false negative rate.

Probability: The estimated probability that the sample is in the positive category. This assumes that the Bayesian score follows a normal distribution and is different from the prediction using a cutoff.

Enrichment: An estimate of enrichment, that is, the increased likelihood (versus random) of this sample being in the category.

Bayesian Score: The standard Laplacian-modified Bayesian score.

Mahalanobis Distance: The Mahalanobis distance (MD) is the distance to the center of the training data. The larger the MD, the less trustworthy the prediction.

Mahalanobis Distance p-value: The p-value gives the fraction of training data with an MD greater than or equal to the one for the given sample, assuming normally distributed data. The smaller the p-value, the less trustworthy the prediction. For highly non-normal X properties (e.g., fingerprints), the MD p-value is wildly inaccurate.

## Structural Similar Compounds

| Name               | Benzenesulfonic acid, 2-anilino-5-nitro-                                                                                                           | 2-Anthracenesulfonic acid, 1-amino-9,10-dihydro-9,10-dioxo-4-(2,4,6-trimethylanilino)-, monosodium salt                                            | Urea, 1,3-bis(2-benzothiazolythiomethyl)-                                                                                                                                      |
|--------------------|----------------------------------------------------------------------------------------------------------------------------------------------------|----------------------------------------------------------------------------------------------------------------------------------------------------|--------------------------------------------------------------------------------------------------------------------------------------------------------------------------------|
| Structure          |                                                                                                                                                    |                                                                                                                                                    |                                                                                                                                                                                |
| Actual Endpoint    | Irritant                                                                                                                                           | Irritant                                                                                                                                           | Irritant                                                                                                                                                                       |
| Predicted Endpoint | Non-Irritant                                                                                                                                       | Non-Irritant                                                                                                                                       | Irritant                                                                                                                                                                       |
| Distance           | 0.676                                                                                                                                              | 0.741                                                                                                                                              | 0.774                                                                                                                                                                          |
| Reference          | 85JCAE "Prehled Prumyslove Toxikologie; Organicke Latky," Marhold, J., Prague, Czechoslovakia, Avicenum, 1986 Volume(issue)/page/year: -,1061,1986 | 85JCAE "Prehled Prumyslove Toxikologie; Organicke Latky," Marhold, J., Prague, Czechoslovakia, Avicenum, 1986 Volume(issue)/page/year: -,1327,1986 | AMIHBC AMA Archives of Industrial Hygiene and Occupational Medicine. (Chicago, IL) V.2-10, 1950-54. For publisher information, see AEHLAU. Volume(issue)/page/year: 5,311,1952 |

## Model Applicability

Unknown features are fingerprint features in the query molecule, but not found or appearing too infrequently in the training set.

- All properties and OPS components are within expected ranges.

## Feature Contribution

### Top features for positive contribution

| Fingerprint | Bit/Smiles | Feature Structure | Score | Irritant in training set |
|-------------|------------|-------------------|-------|--------------------------|
|             |            |                   |       |                          |

|                                               |                   |                                                                                                                                                                |              |                                 |
|-----------------------------------------------|-------------------|----------------------------------------------------------------------------------------------------------------------------------------------------------------|--------------|---------------------------------|
| FCFP_12                                       | -1539132615       | <p>AND Enantiomer</p> 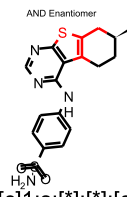 <p>[*]C[c]1:s:[*]:[*]:[c]:1[*]</p>                    | 0.0795       | 9 out of 9                      |
| FCFP_12                                       | -124685461        | <p>AND Enantiomer</p>  <p>[*]:n:[cH]:n:[*]</p>                              | 0.0734       | 5 out of 5                      |
| FCFP_12                                       | -475316933        | <p>AND Enantiomer</p>  <p>[*][c]1:[*]:[c](:[*]):n:[cH]:n:1</p>              | 0.0703       | 4 out of 4                      |
| <b>Top Features for negative contribution</b> |                   |                                                                                                                                                                |              |                                 |
| <b>Fingerprint</b>                            | <b>Bit/Smiles</b> | <b>Feature Structure</b>                                                                                                                                       | <b>Score</b> | <b>Irritant in training set</b> |
| FCFP_12                                       | 839741273         | <p>AND Enantiomer</p>  <p>[*]:[c](:[*])N[c]1:[cH]:[cH]:[*]:[cH]:[cH]:1</p> | -0.708       | 4 out of 10                     |
| FCFP_12                                       | -773983804        | <p>AND Enantiomer</p>  <p>[*]N[c]1:[cH]:[*]:[c]([*]):[cH]:[cH]:1</p>      | -0.444       | 46 out of 79                    |

|         |           |                                                                                                                                                          |        |              |
|---------|-----------|----------------------------------------------------------------------------------------------------------------------------------------------------------|--------|--------------|
| FCFP_12 | 590925877 | <p>AND Enantiomer</p> 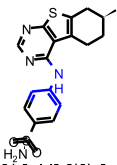 <p><chem>[*]N[C]([cH];[*]):[cH]:[*]</chem></p> | -0.434 | 56 out of 95 |
|---------|-----------|----------------------------------------------------------------------------------------------------------------------------------------------------------|--------|--------------|

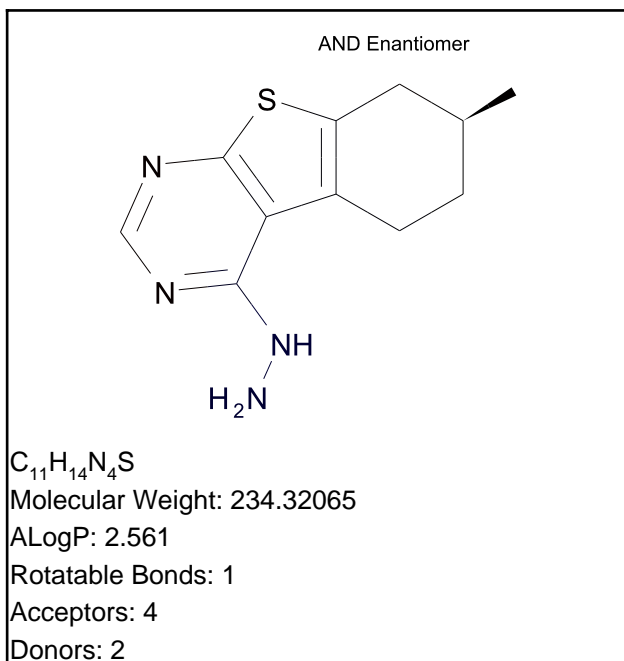

### Model Prediction

Prediction: Non-Irritant

Probability: 0.95

Enrichment: 1.03

Bayesian Score: -1.89

Mahalanobis Distance: 8.12

Mahalanobis Distance p-value: 0.846

Prediction: Positive if the Bayesian score is above the estimated best cutoff value from minimizing the false positive and false negative rate.

Probability: The estimated probability that the sample is in the positive category. This assumes that the Bayesian score follows a normal distribution and is different from the prediction using a cutoff.

Enrichment: An estimate of enrichment, that is, the increased likelihood (versus random) of this sample being in the category.

Bayesian Score: The standard Laplacian-modified Bayesian score.

Mahalanobis Distance: The Mahalanobis distance (MD) is the distance to the center of the training data. The larger the MD, the less trustworthy the prediction.

Mahalanobis Distance p-value: The p-value gives the fraction of training data with an MD greater than or equal to the one for the given sample, assuming normally distributed data. The smaller the p-value, the less trustworthy the prediction. For highly non-normal X properties (e.g., fingerprints), the MD p-value is wildly inaccurate.

### Structural Similar Compounds

| Name               | 1-Naphthalenesulfonic acid, 2-hydroxy-                                                                                                             | Phenol, 4,4'-sulfonyldi-                                                                                                                              | m-Toluene sulfonic acid, 6-amino-4-chloro- |
|--------------------|----------------------------------------------------------------------------------------------------------------------------------------------------|-------------------------------------------------------------------------------------------------------------------------------------------------------|--------------------------------------------|
| Structure          |                                                                                                                                                    |                                                                                                                                                       |                                            |
| Actual Endpoint    | Irritant                                                                                                                                           | Irritant                                                                                                                                              | Non-Irritant                               |
| Predicted Endpoint | Non-Irritant                                                                                                                                       | Non-Irritant                                                                                                                                          | Non-Irritant                               |
| Distance           | 0.559                                                                                                                                              | 0.566                                                                                                                                                 | 0.585                                      |
| Reference          | 85JCAE "Prehled Prumyslove Toxikologie; Organicke Latky," Marhold, J., Prague, Czechoslovakia, Avicenum, 1986 Volume(issue)/page/year: -,1059,1986 | BIOFX* BIOFAX Industrial Bio-Test Laboratories, Inc., Data Sheets. (1810 Fro ntage Rd., Northbrook, IL 60062) Volume(issue)/page/year: 601-05501,1974 | 28ZPAK -,526,72                            |

### Model Applicability

Unknown features are fingerprint features in the query molecule, but not found or appearing too infrequently in the training set.

- All properties and OPS components are within expected ranges.

### Feature Contribution

#### Top features for positive contribution

| Fingerprint | Bit/Smiles  | Feature Structure                                        | Score  | Irritant in training set |
|-------------|-------------|----------------------------------------------------------|--------|--------------------------|
| FCFP_12     | -1539132615 | <p>AND Enantiomer</p> <p>[*]C[c]1:s:[*]:[*]:[c]:1[*]</p> | 0.0795 | 9 out of 9               |

|                                               |                   |                                                                                                                                                        |              |                                 |
|-----------------------------------------------|-------------------|--------------------------------------------------------------------------------------------------------------------------------------------------------|--------------|---------------------------------|
| FCFP_12                                       | -124685461        | <p>AND Enantiomer</p> 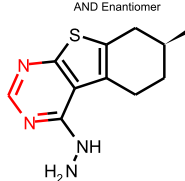 <p>[*]:n:[cH]:n:[*]</p>                      | 0.0734       | 5 out of 5                      |
| FCFP_12                                       | -475316933        | <p>AND Enantiomer</p>  <p>[*][c]1:[*]:[c](:[*])<br/>:n:[cH]:n:1</p> | 0.0703       | 4 out of 4                      |
| <b>Top Features for negative contribution</b> |                   |                                                                                                                                                        |              |                                 |
| <b>Fingerprint</b>                            | <b>Bit/Smiles</b> | <b>Feature Structure</b>                                                                                                                               | <b>Score</b> | <b>Irritant in training set</b> |
| FCFP_12                                       | 1294344583        | <p>AND Enantiomer</p>  <p>[*]NN[c](:[*]):[*]</p>                    | -0.65        | 0 out of 1                      |
| FCFP_12                                       | 1070150408        | <p>AND Enantiomer</p>  <p>[*]NN</p>                                | -0.347       | 1 out of 2                      |
| FCFP_12                                       | 16                | <p>AND Enantiomer</p>  <p>[*][c](:[*]):[*]</p>                    | -0.0843      | 423 out of 503                  |

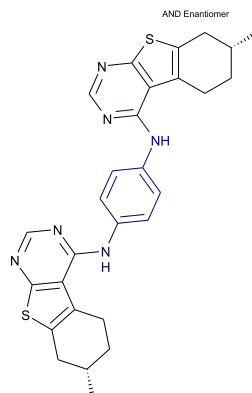
 $C_{28}H_{28}N_6S_2$ 

Molecular Weight: 512.69212

ALogP: 7.842

Rotatable Bonds: 4

Acceptors: 6

Donors: 2

## Model Prediction

Prediction: Non-Irritant

Probability: 0.844

Enrichment: 0.916

Bayesian Score: -3.25

Mahalanobis Distance: 10

Mahalanobis Distance p-value: 0.0563

Prediction: Positive if the Bayesian score is above the estimated best cutoff value from minimizing the false positive and false negative rate.

Probability: The estimated probability that the sample is in the positive category. This assumes that the Bayesian score follows a normal distribution and is different from the prediction using a cutoff.

Enrichment: An estimate of enrichment, that is, the increased likelihood (versus random) of this sample being in the category.

Bayesian Score: The standard Laplacian-modified Bayesian score.

Mahalanobis Distance: The Mahalanobis distance (MD) is the distance to the center of the training data. The larger the MD, the less trustworthy the prediction.

Mahalanobis Distance p-value: The p-value gives the fraction of training data with an MD greater than or equal to the one for the given sample, assuming normally distributed data. The smaller the p-value, the less trustworthy the prediction. For highly non-normal X properties (e.g., fingerprints), the MD p-value is wildly inaccurate.

## Structural Similar Compounds

| Name               | Benzenesulfonic acid, 2,2'-(4,4'-biphenylylene)d i-, disod ium salt                                       | Anthraquinone, 1,1'-iminodi-                                                                                                                       | Urea, 1,3-bis(2-benzothiazolythiomethyl)-                                                                                                                                        |
|--------------------|-----------------------------------------------------------------------------------------------------------|----------------------------------------------------------------------------------------------------------------------------------------------------|----------------------------------------------------------------------------------------------------------------------------------------------------------------------------------|
| Structure          |                                                                                                           |                                                                                                                                                    |                                                                                                                                                                                  |
| Actual Endpoint    | Irritant                                                                                                  | Irritant                                                                                                                                           | Irritant                                                                                                                                                                         |
| Predicted Endpoint | Non-Irritant                                                                                              | Non-Irritant                                                                                                                                       | Irritant                                                                                                                                                                         |
| Distance           | 0.699                                                                                                     | 0.938                                                                                                                                              | 0.953                                                                                                                                                                            |
| Reference          | MVCRB3 MVC-Report. (Stockholm, Sweden) No.1-2, 1972-73. Discontinued. Volume(issue)/page/year: 2,193,1973 | 85JCAE "Prehled Prumyslove Toxikologie; Organicke Latky," Marhold, J., Prague , Czechoslovakia, Avicenum, 1986 Volume(issue)/page/year: -,735,1986 | AMIHBC AMA Archives of Industrial Hygiene and Occupational Medicine. (Chicago , IL) V.2-10, 1950-54. For publisher information, see AEHLAU. Volume(issue)/pag e/year: 5,311,1952 |

## Model Applicability

Unknown features are fingerprint features in the query molecule, but not found or appearing too infrequently in the training set.

1. All properties and OPS components are within expected ranges.

## Feature Contribution

### Top features for positive contribution

| Fingerprint | Bit/Smiles | Feature Structure | Score | Irritant in training set |
|-------------|------------|-------------------|-------|--------------------------|
|             |            |                   |       |                          |

|                                               |                   |                                                                                                                                                                    |              |                                 |
|-----------------------------------------------|-------------------|--------------------------------------------------------------------------------------------------------------------------------------------------------------------|--------------|---------------------------------|
| FCFP_12                                       | -1539132615       | <p>AND Enantiomer</p> 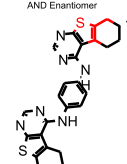 <p>[*]C[c]1:s:[*]:[*]:[c]:1[*]</p>                       | 0.0795       | 9 out of 9                      |
| FCFP_12                                       | -124685461        | <p>AND Enantiomer</p>  <p>[*]:n:[cH]:n:[*]</p>                                  | 0.0734       | 5 out of 5                      |
| FCFP_12                                       | -475316933        | <p>AND Enantiomer</p>  <p>[*][c]1:[*]:[c](:[*])<br/>:n:[cH]:n:1</p>             | 0.0703       | 4 out of 4                      |
| <b>Top Features for negative contribution</b> |                   |                                                                                                                                                                    |              |                                 |
| <b>Fingerprint</b>                            | <b>Bit/Smiles</b> | <b>Feature Structure</b>                                                                                                                                           | <b>Score</b> | <b>Irritant in training set</b> |
| FCFP_12                                       | -200702388        | <p>AND Enantiomer</p>  <p>[*]:[c](:[*])N[c]1:[c]H]:[cH]:[c](N):[cH]:[cH]:1</p> | -0.846       | 1 out of 4                      |
| FCFP_12                                       | 839741273         | <p>AND Enantiomer</p>  <p>[*]:[c](:[*])N[c]1:[c]H]:[cH]:[*]:[cH]:[cH]:1</p>   | -0.708       | 4 out of 10                     |

|         |            |                                                                                                                                                              |        |              |
|---------|------------|--------------------------------------------------------------------------------------------------------------------------------------------------------------|--------|--------------|
| FCFP_12 | -773983804 | <p>AND Enantiomer</p> 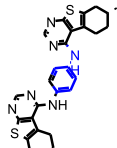 <p>[*]N[c]1:[cH]:[*]:[c]<br/>([*]):[cH]:[cH]:1</p> | -0.444 | 46 out of 79 |
|---------|------------|--------------------------------------------------------------------------------------------------------------------------------------------------------------|--------|--------------|



# Erlotinib

# TOPKAT\_Skin\_Irritancy\_None\_vs\_Irritant

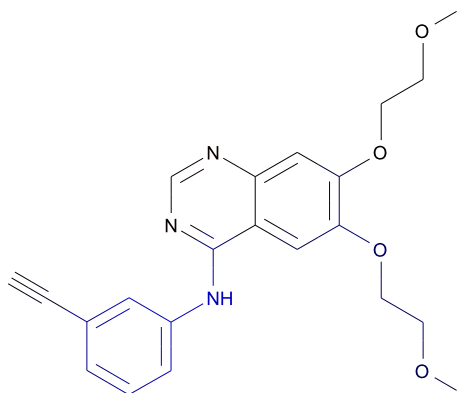

$C_{22}H_{23}N_3O_4$

Molecular Weight: 393.43572

ALogP: 4.309

Rotatable Bonds: 10

Acceptors: 7

Donors: 1

## Model Prediction

Prediction: Non-Irritant

Probability: 0.119

Enrichment: 0.13

Bayesian Score: -5.76

Mahalanobis Distance: 10.2

Mahalanobis Distance p-value: 0.0333

Prediction: Positive if the Bayesian score is above the estimated best cutoff value from minimizing the false positive and false negative rate.

Probability: The estimated probability that the sample is in the positive category. This assumes that the Bayesian score follows a normal distribution and is different from the prediction using a cutoff.

Enrichment: An estimate of enrichment, that is, the increased likelihood (versus random) of this sample being in the category.

Bayesian Score: The standard Laplacian-modified Bayesian score.

Mahalanobis Distance: The Mahalanobis distance (MD) is the distance to the center of the training data. The larger the MD, the less trustworthy the prediction.

Mahalanobis Distance p-value: The p-value gives the fraction of training data with an MD greater than or equal to the one for the given sample, assuming normally distributed data. The smaller the p-value, the less trustworthy the prediction. For highly non-normal X properties (e.g., fingerprints), the MD p-value is wildly inaccurate.

## Structural Similar Compounds

| Name               | Propanoic acid, 2-(4-((5-(trifluoromethyl)-2-pyridinyl)oxy)phenoxy)-, butyl ester                                                                                                                      | Carbamic acid, ((dibutylamino)thio)methyl-, 2,2-dimethyl-2,3-dihydro-7-benzofuranyl ester                                                                                      | 1,4-Pentadien-3-one, 1,5-bis(p-azidophenyl)-                                                                                                      |
|--------------------|--------------------------------------------------------------------------------------------------------------------------------------------------------------------------------------------------------|--------------------------------------------------------------------------------------------------------------------------------------------------------------------------------|---------------------------------------------------------------------------------------------------------------------------------------------------|
| Structure          |                                                                                                                                                                                                        |                                                                                                                                                                                |                                                                                                                                                   |
| Actual Endpoint    | Irritant                                                                                                                                                                                               | Irritant                                                                                                                                                                       | Irritant                                                                                                                                          |
| Predicted Endpoint | Irritant                                                                                                                                                                                               | Irritant                                                                                                                                                                       | Irritant                                                                                                                                          |
| Distance           | 0.776                                                                                                                                                                                                  | 0.777                                                                                                                                                                          | 0.803                                                                                                                                             |
| Reference          | NNGADV Nippon Noyaku Gakkai. Journal of the Pesticide Science Society of Japan. (Nippon Noyaku Gakkai, 1-43-11, Komagome, Toshima-ku, Tokyo 170, Japan) V.1-1976- Volume(issue)/page/year: 15,305,1990 | NTIS** National Technical Information Service. (Springfield, VA 22161) Formerly U.S. Clearinghouse for Scientific & Technical Information. Volume(issue)/page/year: OTS0539690 | 85JCAE "Prehled Prumyslove Toxikologie; Organické Latky," Marhold, J., Prague, Czechoslovakia, Avicenum, 1986 Volume(issue)/page/year: -,733,1986 |

## Model Applicability

Unknown features are fingerprint features in the query molecule, but not found or appearing too infrequently in the training set.

1. All properties and OPS components are within expected ranges.
2. Unknown FCFP\_2 feature: 902193919: [\*]:[c](:[\*])C#C

## Feature Contribution

### Top features for positive contribution

| Fingerprint | Bit/Smiles | Feature Structure | Score | Irritant in training set |
|-------------|------------|-------------------|-------|--------------------------|
|             |            |                   |       |                          |

|                                               |                   |                                                                                                                                                     |              |                                 |
|-----------------------------------------------|-------------------|-----------------------------------------------------------------------------------------------------------------------------------------------------|--------------|---------------------------------|
| FCFP_12                                       | -124685461        | 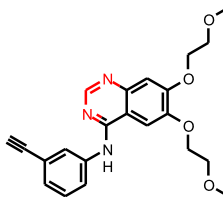<br>[*]:n:[cH]:n:[*]                                              | 0.0734       | 5 out of 5                      |
| FCFP_12                                       | -475316933        | <br>[*][c]1:[*]:[c](:[*])<br>:n:[cH]:n:1                         | 0.0703       | 4 out of 4                      |
| FCFP_12                                       | -1385265413       | <br>[*]:[cH]:[c]1:n:[cH]:<br>n:[*]:[c]:1:[*]                     | 0.0658       | 3 out of 3                      |
| <b>Top Features for negative contribution</b> |                   |                                                                                                                                                     |              |                                 |
| <b>Fingerprint</b>                            | <b>Bit/Smiles</b> | <b>Feature Structure</b>                                                                                                                            | <b>Score</b> | <b>Irritant in training set</b> |
| FCFP_12                                       | 411414971         | <br>[*][c]1:[cH]:[cH]:[cH]<br>]:[c](N[c](:[*]):[*])<br>):[cH]:1 | -1.31        | 1 out of 7                      |
| FCFP_12                                       | -1059904848       | <br>[*][c](:[*]):[c](OCCO<br>C):[cH]:[*]                       | -1.04        | 0 out of 2                      |

|         |           |                                                                                                                                                   |        |             |
|---------|-----------|---------------------------------------------------------------------------------------------------------------------------------------------------|--------|-------------|
| FCFP_12 | 839741273 | 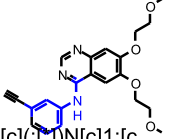<br><chem>[*]:[c](:[*])N[c]1:[c]H]:[cH]:[*]:[cH]:[cH]:1</chem> | -0.708 | 4 out of 10 |
|---------|-----------|---------------------------------------------------------------------------------------------------------------------------------------------------|--------|-------------|

5a

TOPKAT\_Carcinogenic\_Potency\_TD50\_Mouse

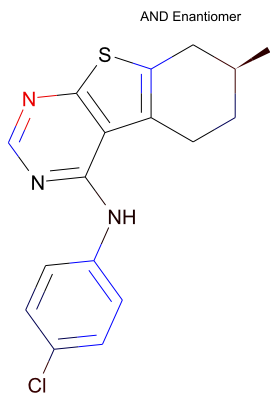C<sub>17</sub>H<sub>16</sub>ClN<sub>3</sub>S

Molecular Weight: 329.84704

ALogP: 5.5

Rotatable Bonds: 2

Acceptors: 3

Donors: 1

**Model Prediction**

Prediction: 3.09

Unit: mg/kg\_body\_weight/day

Mahalanobis Distance: 11.8

Mahalanobis Distance p-value: 4.72e-005

Mahalanobis Distance: The Mahalanobis distance (MD) is a generalization of the Euclidean distance that accounts for correlations among the X properties. It is calculated as the distance to the center of the training data. The larger the MD, the less trustworthy the prediction.

Mahalanobis Distance p-value: The p-value gives the fraction of training data with an MD greater than or equal to the one for the given sample, assuming normally distributed data. The smaller the p-value, the less trustworthy the prediction. For highly non-normal X properties (e.g., fingerprints), the MD p-value is wildly inaccurate.

**Structural Similar Compounds**

| Name                        | Phenolphthalein | 646      | 1-Amino-2,4-dibromoanthra-qui-none |
|-----------------------------|-----------------|----------|------------------------------------|
| Structure                   |                 |          |                                    |
| Actual Endpoint (-log C)    | 2.43468         | 0.937339 | 2.90243                            |
| Predicted Endpoint (-log C) | 3.66084         | 3.26294  | 3.50402                            |
| Distance                    | 0.663           | 0.701    | 0.750                              |
| Reference                   | CPDB            | CPDB     | CPDB                               |

**Model Applicability**

Unknown features are fingerprint features in the query molecule, but not found or appearing too infrequently in the training set.

1. All properties and OPS components are within expected ranges.
2. Unknown ECFP\_2 feature: 292958156: [\*]CC(C)C[\*]
3. Unknown ECFP\_2 feature: -1672647522: [\*]C[c]1:s:[\*]:[\*]:[c]:1[\*]
4. Unknown ECFP\_2 feature: -1597579789: [\*]:n:[c]1:s:[\*]:[\*]:[c]:1[\*]

**Feature Contribution****Top features for positive contribution**

| Fingerprint | Bit/Smiles | Feature Structure | Score |
|-------------|------------|-------------------|-------|
| ECFP_6      | 655739385  | <br>[*]:n:[*]     | 0.229 |

|                                               |                   |                                                                                                                                                  |              |
|-----------------------------------------------|-------------------|--------------------------------------------------------------------------------------------------------------------------------------------------|--------------|
| ECFP_6                                        | -817402818        | <p>AND Enantiomer</p> 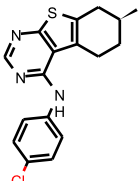 <p>[*]Cl</p>                           | 0.129        |
| ECFP_6                                        | -167460056        | <p>AND Enantiomer</p>  <p>[*]C([*])[*]</p>                    | 0.0596       |
| <b>Top Features for negative contribution</b> |                   |                                                                                                                                                  |              |
| <b>Fingerprint</b>                            | <b>Bit/Smiles</b> | <b>Feature Structure</b>                                                                                                                         | <b>Score</b> |
| ECFP_6                                        | 1996767644        | <p>AND Enantiomer</p>  <p>[*][c](:[*]):[cH]:[cH];[cH];[*]</p> | -0.251       |
| ECFP_6                                        | 642810091         | <p>AND Enantiomer</p>  <p>[*][c](:[*]):[*]</p>              | -0.247       |
| ECFP_6                                        | -182236392        | <p>AND Enantiomer</p>  <p>[*]:[cH]:[*]</p>                  | -0.232       |



5b

TOPKAT\_Carcinogenic\_Potency\_TD50\_Mouse

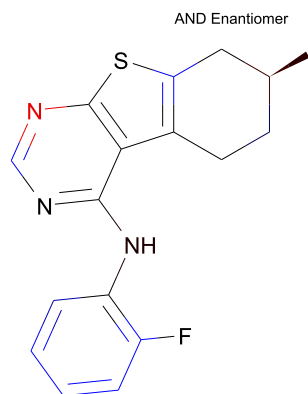

$C_{17}H_{16}FN_3S$   
 Molecular Weight: 313.39244  
 ALogP: 5.041  
 Rotatable Bonds: 2  
 Acceptors: 3  
 Donors: 1

### Model Prediction

Prediction: 9.29  
 Unit: mg/kg\_body\_weight/day  
 Mahalanobis Distance: 10.9  
 Mahalanobis Distance p-value: 0.00248

Mahalanobis Distance: The Mahalanobis distance (MD) is a generalization of the Euclidean distance that accounts for correlations among the X properties. It is calculated as the distance to the center of the training data. The larger the MD, the less trustworthy the prediction.

Mahalanobis Distance p-value: The p-value gives the fraction of training data with an MD greater than or equal to the one for the given sample, assuming normally distributed data. The smaller the p-value, the less trustworthy the prediction. For highly non-normal X properties (e.g., fingerprints), the MD p-value is wildly inaccurate.

### Structural Similar Compounds

| Name                        | Phenolphthalein | 646      | 1-Amino-2,4-dibromoanthra-qui-none |
|-----------------------------|-----------------|----------|------------------------------------|
| Structure                   |                 |          |                                    |
| Actual Endpoint (-log C)    | 2.43468         | 0.937339 | 2.90243                            |
| Predicted Endpoint (-log C) | 3.66084         | 3.26294  | 3.50402                            |
| Distance                    | 0.636           | 0.691    | 0.731                              |
| Reference                   | CPDB            | CPDB     | CPDB                               |

### Model Applicability

Unknown features are fingerprint features in the query molecule, but not found or appearing too infrequently in the training set.

1. All properties and OPS components are within expected ranges.
2. Unknown ECFP\_2 feature: 292958156: [\*]CC(C)C[\*]
3. Unknown ECFP\_2 feature: -1672647522: [\*]C[c]1:s:[\*]:[\*]:[c]:1[\*]
4. Unknown ECFP\_2 feature: -1597579789: [\*]:n:[c]1:s:[\*]:[\*]:[c]:1[\*]
5. Unknown ECFP\_2 feature: -1311285389: [\*][c](:[\*]):[c](F):c:[\*]

### Feature Contribution

#### Top features for positive contribution

| Fingerprint | Bit/Smiles | Feature Structure                      | Score |
|-------------|------------|----------------------------------------|-------|
| ECFP_6      | 655739385  | <p>AND Enantiomer</p> <p>[*]:n:[*]</p> | 0.229 |

|                                               |                   |                                                                                                                                                  |              |
|-----------------------------------------------|-------------------|--------------------------------------------------------------------------------------------------------------------------------------------------|--------------|
| ECFP_6                                        | -167460056        | <p>AND Enantiomer</p> 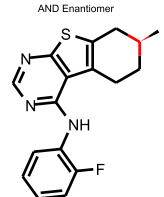 <p>[*]C([*])[*]</p>                    | 0.0596       |
| ECFP_6                                        | 734603939         | <p>AND Enantiomer</p>  <p>[*]C</p>                            | 0.0424       |
| <b>Top Features for negative contribution</b> |                   |                                                                                                                                                  |              |
| <b>Fingerprint</b>                            | <b>Bit/Smiles</b> | <b>Feature Structure</b>                                                                                                                         | <b>Score</b> |
| ECFP_6                                        | 1996767644        | <p>AND Enantiomer</p>  <p>[*][c](:[*]):[cH]:[cH]:[cH]:[*]</p> | -0.251       |
| ECFP_6                                        | 642810091         | <p>AND Enantiomer</p>  <p>[*][c](:[*]):[*]</p>              | -0.247       |
| ECFP_6                                        | -182236392        | <p>AND Enantiomer</p>  <p>[*]:[cH]:[*]</p>                  | -0.232       |





5c

TOPKAT\_Carcinogenic\_Potency\_TD50\_Mouse

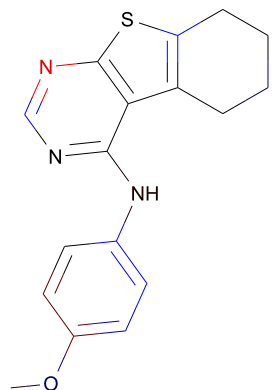C<sub>17</sub>H<sub>17</sub>N<sub>3</sub>OS

Molecular Weight: 311.40138

ALogP: 4.568

Rotatable Bonds: 3

Acceptors: 4

Donors: 1

### Model Prediction

Prediction: 7.19

Unit: mg/kg\_body\_weight/day

Mahalanobis Distance: 12.3

Mahalanobis Distance p-value: 4.73e-006

Mahalanobis Distance: The Mahalanobis distance (MD) is a generalization of the Euclidean distance that accounts for correlations among the X properties. It is calculated as the distance to the center of the training data. The larger the MD, the less trustworthy the prediction.

Mahalanobis Distance p-value: The p-value gives the fraction of training data with an MD greater than or equal to the one for the given sample, assuming normally distributed data. The smaller the p-value, the less trustworthy the prediction. For highly non-normal X properties (e.g., fingerprints), the MD p-value is wildly inaccurate.

### Structural Similar Compounds

| Name                        | Phenolphthalein | 646      | C.I. pigment red 3 |
|-----------------------------|-----------------|----------|--------------------|
| Structure                   |                 |          |                    |
| Actual Endpoint (-log C)    | 2.43468         | 0.937339 | 0.937339           |
| Predicted Endpoint (-log C) | 3.66084         | 3.26294  | 3.17837            |
| Distance                    | 0.626           | 0.648    | 0.702              |
| Reference                   | CPDB            | CPDB     | CPDB               |

### Model Applicability

Unknown features are fingerprint features in the query molecule, but not found or appearing too infrequently in the training set.

1. All properties and OPS components are within expected ranges.
2. Unknown ECFP\_2 feature: -1672647522: [\*]C[c]1:s:[\*]:[\*]:[c]:1[\*]
3. Unknown ECFP\_2 feature: -1597579789: [\*]:n:[c]1:s:[\*]:[\*]:[c]:1[\*]

### Feature Contribution

#### Top features for positive contribution

| Fingerprint | Bit/Smiles | Feature Structure | Score |
|-------------|------------|-------------------|-------|
| ECFP_6      | 655739385  | <br>[*]:n:[*]     | 0.229 |

| ECFP_6                                 | -176455838 | 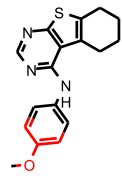<br><chem>[*]O[c](:[cH]:[*]):[cH]:[*]</chem> | 0.0818 |
|----------------------------------------|------------|---------------------------------------------------------------------------------------------------------------------------------|--------|
| ECFP_6                                 | 734603939  | <br><chem>[*]C</chem>                        | 0.0424 |
| Top Features for negative contribution |            |                                                                                                                                 |        |
| Fingerprint                            | Bit/Smiles | Feature Structure                                                                                                               | Score  |
| ECFP_6                                 | 1996767644 | <br><chem>[*][c](:[*]):[cH]:[cH]:[*]</chem>  | -0.251 |
| ECFP_6                                 | 642810091  | <br><chem>[*][c](:[*]):[*]</chem>           | -0.247 |
| ECFP_6                                 | -182236392 | <br><chem>[*]:[cH]:[*]</chem>              | -0.232 |



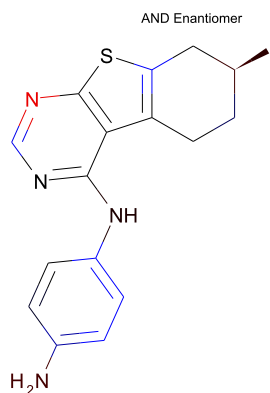

$C_{17}H_{18}N_4S$

Molecular Weight: 310.41662

ALogP: 4.089

Rotatable Bonds: 2

Acceptors: 4

Donors: 2

### Model Prediction

Prediction: 3.25

Unit: mg/kg\_body\_weight/day

Mahalanobis Distance: 11.4

Mahalanobis Distance p-value: 0.000343

Mahalanobis Distance: The Mahalanobis distance (MD) is a generalization of the Euclidean distance that accounts for correlations among the X properties. It is calculated as the distance to the center of the training data. The larger the MD, the less trustworthy the prediction.

Mahalanobis Distance p-value: The p-value gives the fraction of training data with an MD greater than or equal to the one for the given sample, assuming normally distributed data. The smaller the p-value, the less trustworthy the prediction. For highly non-normal X properties (e.g., fingerprints), the MD p-value is wildly inaccurate.

### Structural Similar Compounds

| Name                        | Phenolphthalein | 646      | C.I. pigment red 3 |
|-----------------------------|-----------------|----------|--------------------|
| Structure                   |                 |          |                    |
| Actual Endpoint (-log C)    | 2.43468         | 0.937339 | 0.937339           |
| Predicted Endpoint (-log C) | 3.66084         | 3.26294  | 3.17837            |
| Distance                    | 0.596           | 0.686    | 0.725              |
| Reference                   | CPDB            | CPDB     | CPDB               |

### Model Applicability

Unknown features are fingerprint features in the query molecule, but not found or appearing too infrequently in the training set.

1. All properties and OPS components are within expected ranges.
2. Unknown ECFP\_2 feature: 292958156: [\*]CC(C)C[\*]
3. Unknown ECFP\_2 feature: -1672647522: [\*]C[c]1:s:[\*]:[\*]:[c]:1[\*]
4. Unknown ECFP\_2 feature: -1597579789: [\*]:n:[c]1:s:[\*]:[\*]:[c]:1[\*]

### Feature Contribution

#### Top features for positive contribution

| Fingerprint | Bit/Smiles | Feature Structure | Score |
|-------------|------------|-------------------|-------|
| ECFP_6      | 655739385  | <br>[*]:n:[*]     | 0.229 |

|                                               |                   |                                                                                                                                                               |              |
|-----------------------------------------------|-------------------|---------------------------------------------------------------------------------------------------------------------------------------------------------------|--------------|
| ECFP_6                                        | 1572579716        | <p>AND Enantiomer</p> 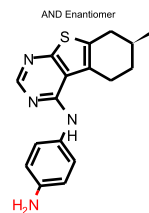 <p><chem>[*]N</chem></p>                             | 0.225        |
| ECFP_6                                        | -167460056        | <p>AND Enantiomer</p>  <p><chem>[*]C([*])[*]</chem></p>                    | 0.0596       |
| <b>Top Features for negative contribution</b> |                   |                                                                                                                                                               |              |
| <b>Fingerprint</b>                            | <b>Bit/Smiles</b> | <b>Feature Structure</b>                                                                                                                                      | <b>Score</b> |
| ECFP_6                                        | 1996767644        | <p>AND Enantiomer</p>  <p><chem>[*][c](:[*]):[cH]:[cH]:[cH]:[*]</chem></p> | -0.251       |
| ECFP_6                                        | 642810091         | <p>AND Enantiomer</p>  <p><chem>[*][c](:[*]):[*]</chem></p>              | -0.247       |
| ECFP_6                                        | -182236392        | <p>AND Enantiomer</p>  <p><chem>[*]:[cH]:[*]</chem></p>                  | -0.232       |



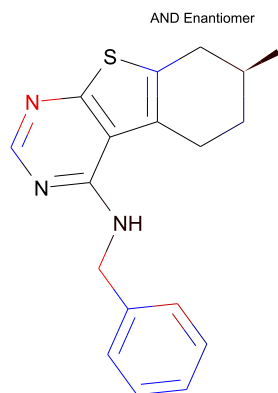

$C_{18}H_{19}N_3S$

Molecular Weight: 309.42856

ALogP: 4.678

Rotatable Bonds: 3

Acceptors: 3

Donors: 1

### Model Prediction

Prediction: 4.81

Unit: mg/kg\_body\_weight/day

Mahalanobis Distance: 10.6

Mahalanobis Distance p-value: 0.00592

Mahalanobis Distance: The Mahalanobis distance (MD) is a generalization of the Euclidean distance that accounts for correlations among the X properties. It is calculated as the distance to the center of the training data. The larger the MD, the less trustworthy the prediction.

Mahalanobis Distance p-value: The p-value gives the fraction of training data with an MD greater than or equal to the one for the given sample, assuming normally distributed data. The smaller the p-value, the less trustworthy the prediction. For highly non-normal X properties (e.g., fingerprints), the MD p-value is wildly inaccurate.

### Structural Similar Compounds

| Name                        | Phenolphthalein | 646      | 1077    |
|-----------------------------|-----------------|----------|---------|
| Structure                   |                 |          |         |
| Actual Endpoint (-log C)    | 2.43468         | 0.937339 | 3.82962 |
| Predicted Endpoint (-log C) | 3.66084         | 3.26294  | 3.933   |
| Distance                    | 0.634           | 0.689    | 0.715   |
| Reference                   | CPDB            | CPDB     | CPDB    |

### Model Applicability

Unknown features are fingerprint features in the query molecule, but not found or appearing too infrequently in the training set.

1. All properties and OPS components are within expected ranges.
2. Unknown ECFP\_2 feature: 292958156: [\*]CC(C)C[\*]
3. Unknown ECFP\_2 feature: -1672647522: [\*]C[c]1:s:[\*]:[\*]:[c]:1[\*]
4. Unknown ECFP\_2 feature: -1597579789: [\*]:n:[c]1:s:[\*]:[\*]:[c]:1[\*]

### Feature Contribution

#### Top features for positive contribution

| Fingerprint | Bit/Smiles | Feature Structure | Score |
|-------------|------------|-------------------|-------|
| ECFP_6      | 655739385  | <br>[*]:n:[*]     | 0.229 |



|                                               |                   |                                                                                                                                              |              |
|-----------------------------------------------|-------------------|----------------------------------------------------------------------------------------------------------------------------------------------|--------------|
| ECFP_6                                        | 1559650422        | <p>AND Enantiomer</p> 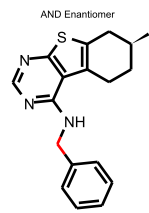 <p>[*]C[*]</p>                      | 0.203        |
| ECFP_6                                        | -2024255407       | <p>AND Enantiomer</p>  <p>[*]C[c](:[cH]:[*]):[cH]:[*]</p> | 0.172        |
| <b>Top Features for negative contribution</b> |                   |                                                                                                                                              |              |
| <b>Fingerprint</b>                            | <b>Bit/Smiles</b> | <b>Feature Structure</b>                                                                                                                     | <b>Score</b> |
| ECFP_6                                        | 1996767644        | <p>AND Enantiomer</p>  <p>[*][c](:[*]):[cH]:[cH]:[*]</p>  | -0.251       |
| ECFP_6                                        | 642810091         | <p>AND Enantiomer</p>  <p>[*][c](:[*]):[*]</p>          | -0.247       |
| ECFP_6                                        | -182236392        | <p>AND Enantiomer</p>  <p>[*]:[cH]:[*]</p>              | -0.232       |



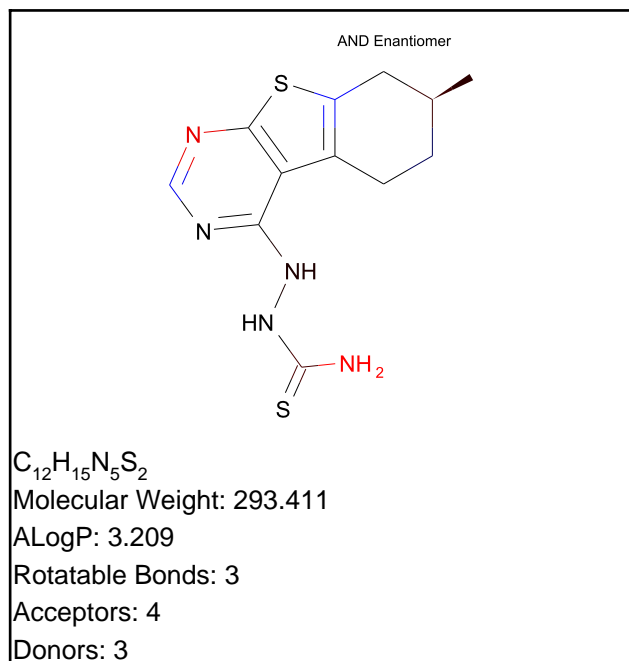

### Model Prediction

Prediction: 2.92

Unit: mg/kg\_body\_weight/day

Mahalanobis Distance: 12.9

Mahalanobis Distance p-value: 1.8e-007

Mahalanobis Distance: The Mahalanobis distance (MD) is a generalization of the Euclidean distance that accounts for correlations among the X properties. It is calculated as the distance to the center of the training data. The larger the MD, the less trustworthy the prediction.

Mahalanobis Distance p-value: The p-value gives the fraction of training data with an MD greater than or equal to the one for the given sample, assuming normally distributed data. The smaller the p-value, the less trustworthy the prediction. For highly non-normal X properties (e.g., fingerprints), the MD p-value is wildly inaccurate.

### Structural Similar Compounds

| Name                        | 2-Hydrazino-4-(p-nitrophenyl) thiazole                                              | Furoseimide                                                                         | 2-Hydrazino-4-(5-nitro-2-furyl) thi-azole                                           |
|-----------------------------|-------------------------------------------------------------------------------------|-------------------------------------------------------------------------------------|-------------------------------------------------------------------------------------|
| Structure                   | 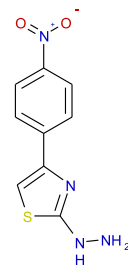 |  |  |
| Actual Endpoint (-log C)    | 4.34807                                                                             | 2.65498                                                                             | 4.13967                                                                             |
| Predicted Endpoint (-log C) | 4.37858                                                                             | 3.60472                                                                             | 4.34552                                                                             |
| Distance                    | 0.685                                                                               | 0.687                                                                               | 0.699                                                                               |
| Reference                   | CPDB                                                                                | CPDB                                                                                | CPDB                                                                                |

### Model Applicability

Unknown features are fingerprint features in the query molecule, but not found or appearing too infrequently in the training set.

1. All properties and OPS components are within expected ranges.
2. Unknown ECFP\_2 feature: 292958156: [\*]CC(C)C[\*]
3. Unknown ECFP\_2 feature: -1672647522: [\*]C[c]1:s:[\*]:[\*]:[c]:1[\*]
4. Unknown ECFP\_2 feature: -1597579789: [\*]:n:[c]1:s:[\*]:[\*]:[c]:1[\*]
5. Unknown ECFP\_2 feature: -571028867: [\*]NC(=S)N

### Feature Contribution

#### Top features for positive contribution

| Fingerprint | Bit/Smiles | Feature Structure                                                                                  | Score |
|-------------|------------|----------------------------------------------------------------------------------------------------|-------|
| ECFP_6      | 655739385  | 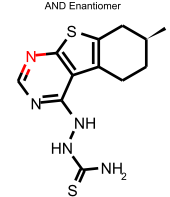<br>[*]:n:[*] | 0.229 |

|                                               |                   |                                                                                                                                   |              |
|-----------------------------------------------|-------------------|-----------------------------------------------------------------------------------------------------------------------------------|--------------|
| ECFP_6                                        | 1572579716        | <p>AND Enantiomer</p> 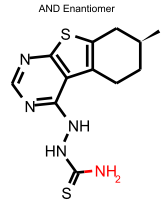 <p>[*]N</p>             | 0.225        |
| ECFP_6                                        | -932108170        | <p>AND Enantiomer</p>  <p>[*]C(=[*])N</p>      | 0.0784       |
| <b>Top Features for negative contribution</b> |                   |                                                                                                                                   |              |
| <b>Fingerprint</b>                            | <b>Bit/Smiles</b> | <b>Feature Structure</b>                                                                                                          | <b>Score</b> |
| ECFP_6                                        | 642810091         | <p>AND Enantiomer</p>  <p>[*][c](:[*]):[*]</p> | -0.247       |
| ECFP_6                                        | -182236392        | <p>AND Enantiomer</p>  <p>[*]:[cH]:[*]</p>   | -0.232       |
| ECFP_6                                        | -992506539        | <p>AND Enantiomer</p>  <p>[*]C[*]</p>        | -0.0852      |



9a

TOPKAT\_Carcinogenic\_Potency\_TD50\_Mouse

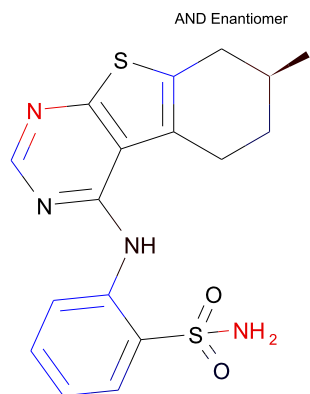
 $C_{17}H_{18}N_4O_2S_2$ 

Molecular Weight: 374.48042

ALogP: 3.541

Rotatable Bonds: 3

Acceptors: 5

Donors: 2

### Model Prediction

Prediction: 8.21

Unit: mg/kg\_body\_weight/day

Mahalanobis Distance: 13.1

Mahalanobis Distance p-value: 8.8e-008

Mahalanobis Distance: The Mahalanobis distance (MD) is a generalization of the Euclidean distance that accounts for correlations among the X properties. It is calculated as the distance to the center of the training data. The larger the MD, the less trustworthy the prediction.

Mahalanobis Distance p-value: The p-value gives the fraction of training data with an MD greater than or equal to the one for the given sample, assuming normally distributed data. The smaller the p-value, the less trustworthy the prediction. For highly non-normal X properties (e.g., fingerprints), the MD p-value is wildly inaccurate.

### Structural Similar Compounds

| Name                        | 542     | Ochratoxin A | 470     |
|-----------------------------|---------|--------------|---------|
| Structure                   |         |              |         |
| Actual Endpoint (-log C)    | 4.79932 | 4.79932      | 4.62839 |
| Predicted Endpoint (-log C) | 3.6353  | 3.6353       | 3.93264 |
| Distance                    | 0.728   | 0.728        | 0.764   |
| Reference                   | CPDB    | CPDB         | CPDB    |

### Model Applicability

Unknown features are fingerprint features in the query molecule, but not found or appearing too infrequently in the training set.

1. All properties and OPS components are within expected ranges.
2. Unknown ECFP\_2 feature: 292958156: [\*]CC(C)C[\*]
3. Unknown ECFP\_2 feature: -1672647522: [\*]C[c]1:s:[\*]:[\*]:[c]:1[\*]
4. Unknown ECFP\_2 feature: -1597579789: [\*]:n:[c]1:s:[\*]:[\*]:[c]:1[\*]

### Feature Contribution

#### Top features for positive contribution

| Fingerprint | Bit/Smiles | Feature Structure | Score |
|-------------|------------|-------------------|-------|
| ECFP_6      | 655739385  | <br>[*]:n:[*]     | 0.229 |

|                                               |                   |                                                                                                                                                  |              |
|-----------------------------------------------|-------------------|--------------------------------------------------------------------------------------------------------------------------------------------------|--------------|
| ECFP_6                                        | 1572579716        | <p>AND Enantiomer</p> 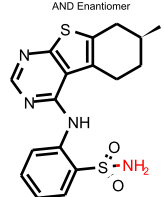 <p>[*]N</p>                            | 0.225        |
| ECFP_6                                        | 167460056         | <p>AND Enantiomer</p>  <p>[*]C([*])[*]</p>                    | 0.0596       |
| <b>Top Features for negative contribution</b> |                   |                                                                                                                                                  |              |
| <b>Fingerprint</b>                            | <b>Bit/Smiles</b> | <b>Feature Structure</b>                                                                                                                         | <b>Score</b> |
| ECFP_6                                        | 1996767644        | <p>AND Enantiomer</p>  <p>[*][c](:[*]):[cH]:[cH]:[cH]:[*]</p> | -0.251       |
| ECFP_6                                        | 642810091         | <p>AND Enantiomer</p>  <p>[*][c](:[*]):[*]</p>              | -0.247       |
| ECFP_6                                        | 182236392         | <p>AND Enantiomer</p>  <p>[*]:[cH]:[*]</p>                  | -0.232       |





9b

TOPKAT\_Carcinogenic\_Potency\_TD50\_Mouse

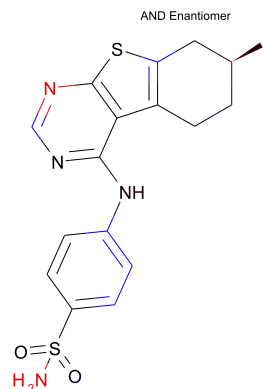
 $C_{17}H_{18}N_4O_2S_2$ 

Molecular Weight: 374.48042

ALogP: 3.541

Rotatable Bonds: 3

Acceptors: 5

Donors: 2

### Model Prediction

Prediction: 3.51

Unit: mg/kg\_body\_weight/day

Mahalanobis Distance: 12.9

Mahalanobis Distance p-value: 1.99e-007

Mahalanobis Distance: The Mahalanobis distance (MD) is a generalization of the Euclidean distance that accounts for correlations among the X properties. It is calculated as the distance to the center of the training data. The larger the MD, the less trustworthy the prediction.

Mahalanobis Distance p-value: The p-value gives the fraction of training data with an MD greater than or equal to the one for the given sample, assuming normally distributed data. The smaller the p-value, the less trustworthy the prediction. For highly non-normal X properties (e.g., fingerprints), the MD p-value is wildly inaccurate.

### Structural Similar Compounds

| Name                        | 542     | Ochratoxin A | 470     |
|-----------------------------|---------|--------------|---------|
| Structure                   |         |              |         |
| Actual Endpoint (-log C)    | 4.79932 | 4.79932      | 4.62839 |
| Predicted Endpoint (-log C) | 3.6353  | 3.6353       | 3.93264 |
| Distance                    | 0.735   | 0.735        | 0.763   |
| Reference                   | CPDB    | CPDB         | CPDB    |

### Model Applicability

Unknown features are fingerprint features in the query molecule, but not found or appearing too infrequently in the training set.

1. All properties and OPS components are within expected ranges.
2. Unknown ECFP\_2 feature: 292958156: [\*]CC(C)C[\*]
3. Unknown ECFP\_2 feature: -1672647522: [\*]C[c]1:s:[\*]:[\*]:[c]:1[\*]
4. Unknown ECFP\_2 feature: -1597579789: [\*]:n:[c]1:s:[\*]:[\*]:[c]:1[\*]

### Feature Contribution

#### Top features for positive contribution

| Fingerprint | Bit/Smiles | Feature Structure | Score |
|-------------|------------|-------------------|-------|
| ECFP_6      | 655739385  | <br>[*]:n:[*]     | 0.229 |





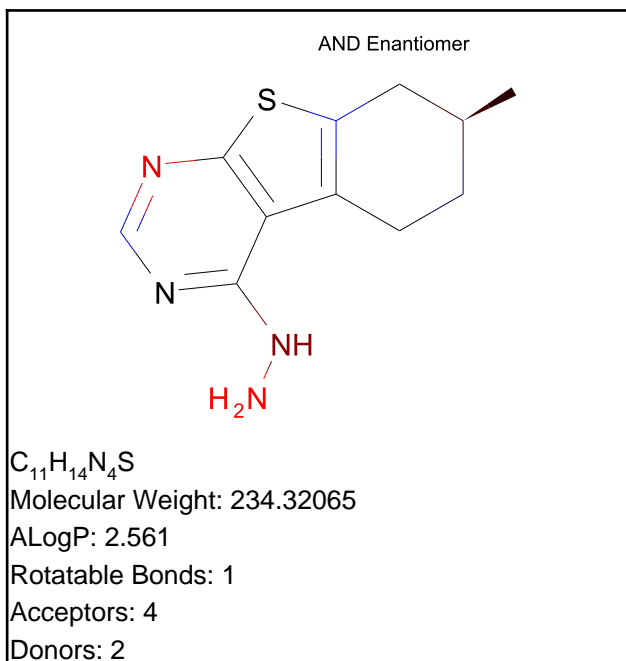

### Model Prediction

Prediction: 2.64

Unit: mg/kg\_body\_weight/day

Mahalanobis Distance: 10.6

Mahalanobis Distance p-value: 0.00657

Mahalanobis Distance: The Mahalanobis distance (MD) is a generalization of the Euclidean distance that accounts for correlations among the X properties. It is calculated as the distance to the center of the training data. The larger the MD, the less trustworthy the prediction.

Mahalanobis Distance p-value: The p-value gives the fraction of training data with an MD greater than or equal to the one for the given sample, assuming normally distributed data. The smaller the p-value, the less trustworthy the prediction. For highly non-normal X properties (e.g., fingerprints), the MD p-value is wildly inaccurate.

### Structural Similar Compounds

| Name                        | Chrysazin                                                                           | 215                                                                                 | 4,4'-Thiodianiline                                                                  |
|-----------------------------|-------------------------------------------------------------------------------------|-------------------------------------------------------------------------------------|-------------------------------------------------------------------------------------|
| Structure                   | 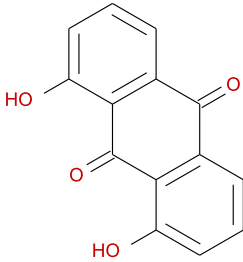 |  |  |
| Actual Endpoint (-log C)    | 3.0774                                                                              | 3.477                                                                               | 3.81392                                                                             |
| Predicted Endpoint (-log C) | 3.07832                                                                             | 3.97642                                                                             | 3.72747                                                                             |
| Distance                    | 0.568                                                                               | 0.618                                                                               | 0.626                                                                               |
| Reference                   | CPDB                                                                                | CPDB                                                                                | CPDB                                                                                |

### Model Applicability

Unknown features are fingerprint features in the query molecule, but not found or appearing too infrequently in the training set.

1. All properties and OPS components are within expected ranges.
2. Unknown ECFP\_2 feature: 292958156: [\*]CC(C)C[\*]
3. Unknown ECFP\_2 feature: -1672647522: [\*]C[c]1:s:[\*]:[\*]:[c]:1[\*]
4. Unknown ECFP\_2 feature: -1597579789: [\*]:n:[c]1:s:[\*]:[\*]:[c]:1[\*]

### Feature Contribution

#### Top features for positive contribution

| Fingerprint | Bit/Smiles | Feature Structure                                                                                                            | Score |
|-------------|------------|------------------------------------------------------------------------------------------------------------------------------|-------|
| ECFP_6      | 655739385  | <p>AND Enantiomer</p> 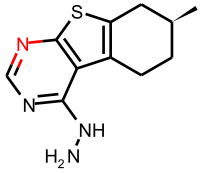 <p>[*]:n:[*]</p> | 0.229 |

|                                               |                   |                                                                                                                                   |              |
|-----------------------------------------------|-------------------|-----------------------------------------------------------------------------------------------------------------------------------|--------------|
| ECFP_6                                        | 1572579716        | <p>AND Enantiomer</p> 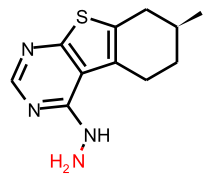 <p>[*]N</p>             | 0.225        |
| ECFP_6                                        | -934039951        | <p>AND Enantiomer</p>  <p>[*]NN</p>            | 0.108        |
| <b>Top Features for negative contribution</b> |                   |                                                                                                                                   |              |
| <b>Fingerprint</b>                            | <b>Bit/Smiles</b> | <b>Feature Structure</b>                                                                                                          | <b>Score</b> |
| ECFP_6                                        | 642810091         | <p>AND Enantiomer</p>  <p>[*][c](:[*]):[*]</p> | -0.247       |
| ECFP_6                                        | -182236392        | <p>AND Enantiomer</p>  <p>[*]:[cH]:[*]</p>   | -0.232       |
| ECFP_6                                        | -992506539        | <p>AND Enantiomer</p>  <p>[*]C[*]</p>        | -0.0852      |



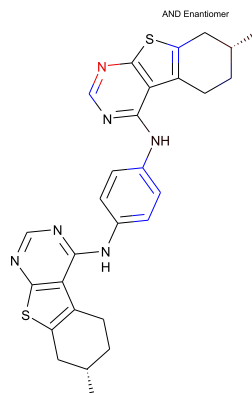
 $C_{28}H_{28}N_6S_2$ 

Molecular Weight: 512.69212

ALogP: 7.842

Rotatable Bonds: 4

Acceptors: 6

Donors: 2

### Model Prediction

Prediction: 0.169

Unit: mg/kg\_body\_weight/day

Mahalanobis Distance: 13.8

Mahalanobis Distance p-value: 1.09e-009

Mahalanobis Distance: The Mahalanobis distance (MD) is a generalization of the Euclidean distance that accounts for correlations among the X properties. It is calculated as the distance to the center of the training data. The larger the MD, the less trustworthy the prediction.

Mahalanobis Distance p-value: The p-value gives the fraction of training data with an MD greater than or equal to the one for the given sample, assuming normally distributed data. The smaller the p-value, the less trustworthy the prediction. For highly non-normal X properties (e.g., fingerprints), the MD p-value is wildly inaccurate.

### Structural Similar Compounds

| Name                        | 223     | Phenolphthalein | 646      |
|-----------------------------|---------|-----------------|----------|
| Structure                   |         |                 |          |
| Actual Endpoint (-log C)    | 5.08368 | 2.43468         | 0.937339 |
| Predicted Endpoint (-log C) | 5.08273 | 3.66084         | 3.26294  |
| Distance                    | 1.084   | 1.139           | 1.147    |
| Reference                   | CPDB    | CPDB            | CPDB     |

### Model Applicability

Unknown features are fingerprint features in the query molecule, but not found or appearing too infrequently in the training set.

1. All properties and OPS components are within expected ranges.
2. Unknown ECFP\_2 feature: 292958156: [\*]CC(C)C[\*]
3. Unknown ECFP\_2 feature: -1672647522: [\*]C[c]1:s:[\*]:[\*]:[c]:1[\*]
4. Unknown ECFP\_2 feature: -1597579789: [\*]:n:[c]1:s:[\*]:[\*]:[c]:1[\*]

### Feature Contribution

#### Top features for positive contribution

| Fingerprint | Bit/Smiles | Feature Structure | Score |
|-------------|------------|-------------------|-------|
| ECFP_6      | 655739385  | <br>[*]:n:[*]     | 0.229 |

|                                               |                   |                                                                                                                                                  |              |
|-----------------------------------------------|-------------------|--------------------------------------------------------------------------------------------------------------------------------------------------|--------------|
| ECFP_6                                        | -167460056        | <p>AND Enantiomer</p> 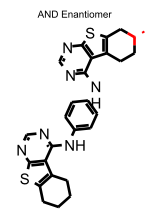 <p>[*]C([*])([*])</p>                   | 0.0596       |
| ECFP_6                                        | 734603939         | <p>AND Enantiomer</p>  <p>[*]C</p>                            | 0.0424       |
| <b>Top Features for negative contribution</b> |                   |                                                                                                                                                  |              |
| <b>Fingerprint</b>                            | <b>Bit/Smiles</b> | <b>Feature Structure</b>                                                                                                                         | <b>Score</b> |
| ECFP_6                                        | 1996767644        | <p>AND Enantiomer</p>  <p>[*][c](:[*]);[cH];[cH];[cH];[*]</p> | -0.251       |
| ECFP_6                                        | 642810091         | <p>AND Enantiomer</p>  <p>[*][c](:[*]);[*]</p>              | -0.247       |
| ECFP_6                                        | -182236392        | <p>AND Enantiomer</p>  <p>[*]:[cH];[*]</p>                  | -0.232       |





# Erlotinib

# TOPKAT\_Carcinogenic\_Potency\_TD50\_Mouse

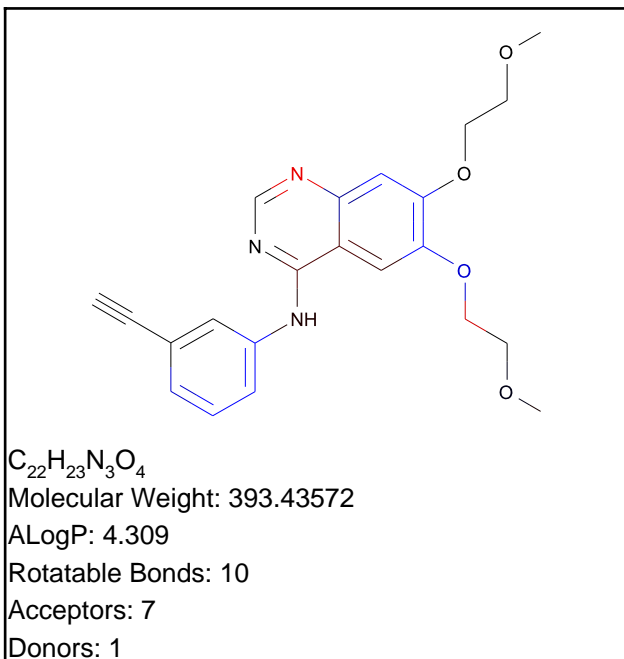

## Model Prediction

Prediction: 39.8

Unit: mg/kg\_body\_weight/day

Mahalanobis Distance: 16.1

Mahalanobis Distance p-value: 1.15e-016

Mahalanobis Distance: The Mahalanobis distance (MD) is a generalization of the Euclidean distance that accounts for correlations among the X properties. It is calculated as the distance to the center of the training data. The larger the MD, the less trustworthy the prediction.

Mahalanobis Distance p-value: The p-value gives the fraction of training data with an MD greater than or equal to the one for the given sample, assuming normally distributed data. The smaller the p-value, the less trustworthy the prediction. For highly non-normal X properties (e.g., fingerprints), the MD p-value is wildly inaccurate.

## Structural Similar Compounds

| Name                        | Compound LY171883                                                                   | 832                                                                                 | 5,5'-(1,1'-Biphenyl)-2,5-dyl-bis (oxy)(2,2-dimethylpentanoic acid)                  |
|-----------------------------|-------------------------------------------------------------------------------------|-------------------------------------------------------------------------------------|-------------------------------------------------------------------------------------|
| Structure                   | 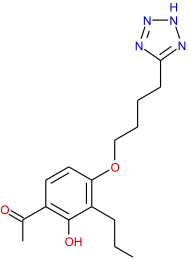 |  |  |
| Actual Endpoint (-log C)    | 3.45372                                                                             | 3.45372                                                                             | 3.90166                                                                             |
| Predicted Endpoint (-log C) | 2.84749                                                                             | 2.80429                                                                             | 2.75893                                                                             |
| Distance                    | 0.772                                                                               | 0.782                                                                               | 0.796                                                                               |
| Reference                   | CPDB                                                                                | CPDB                                                                                | CPDB                                                                                |

## Model Applicability

Unknown features are fingerprint features in the query molecule, but not found or appearing too infrequently in the training set.

1. OPS PC13 out of range. Value: -3.2209. Training min, max, SD, explained variance: -3.068, 3.6909, 1.329, 0.0220.
2. Unknown ECFP\_2 feature: -182178874: [\*]#C[c](:c:[\*]):c:[\*]
3. Unknown ECFP\_2 feature: 1139738044: [\*]:[c](:[\*])C#C
4. Unknown ECFP\_2 feature: -1253653003: [\*]COC

## Feature Contribution

### Top features for positive contribution

| Fingerprint | Bit/Smiles | Feature Structure                                                                                  | Score |
|-------------|------------|----------------------------------------------------------------------------------------------------|-------|
| ECFP_6      | 655739385  | 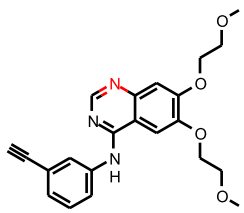<br>[*]:n:[*] | 0.229 |

|                                               |                   |                                                                                                                                      |              |
|-----------------------------------------------|-------------------|--------------------------------------------------------------------------------------------------------------------------------------|--------------|
| ECFP_6                                        | 1559650422        | 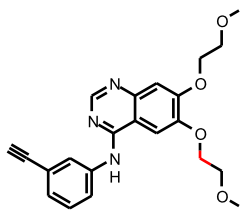<br>[*]C[*]                                        | 0.203        |
| ECFP_6                                        | 1333660716        | <br>[*][c](:[*]):[c](:[cH<br>]:[*]):[c](:[*]):[*] | 0.0746       |
| <b>Top Features for negative contribution</b> |                   |                                                                                                                                      |              |
| <b>Fingerprint</b>                            | <b>Bit/Smiles</b> | <b>Feature Structure</b>                                                                                                             | <b>Score</b> |
| ECFP_6                                        | 1996767644        | <br>[*][c](:[*]):[cH]:[cH<br>]:[*]                | -0.251       |
| ECFP_6                                        | 642810091         | <br>[*][c](:[*]):[*]                             | -0.247       |
| ECFP_6                                        | 182236392         | <br>[*]:[cH]:[*]                                | -0.232       |



5a

TOPKAT\_Carcinogenic\_Potency\_TD50\_Rat

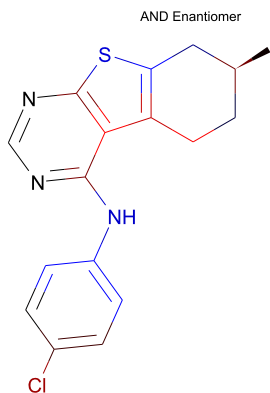C<sub>17</sub>H<sub>16</sub>ClN<sub>3</sub>S

Molecular Weight: 329.84704

ALogP: 5.5

Rotatable Bonds: 2

Acceptors: 3

Donors: 1

**Model Prediction**

Prediction: 3.75

Unit: mg/kg\_body\_weight/day

Mahalanobis Distance: 18.1

Mahalanobis Distance p-value: 1.65e-021

Mahalanobis Distance: The Mahalanobis distance (MD) is a generalization of the Euclidean distance that accounts for correlations among the X properties. It is calculated as the distance to the center of the training data. The larger the MD, the less trustworthy the prediction.

Mahalanobis Distance p-value: The p-value gives the fraction of training data with an MD greater than or equal to the one for the given sample, assuming normally distributed data. The smaller the p-value, the less trustworthy the prediction. For highly non-normal X properties (e.g., fingerprints), the MD p-value is wildly inaccurate.

**Structural Similar Compounds**

| Name                        | Indomethacin | 45      | Phenolphthalein |
|-----------------------------|--------------|---------|-----------------|
| Structure                   |              |         |                 |
| Actual Endpoint (-log C)    | 5.49293      | 3.92659 | 2.54766         |
| Predicted Endpoint (-log C) | 4.9569       | 3.28325 | 3.7508          |
| Distance                    | 0.621        | 0.646   | 0.651           |
| Reference                   | CPDB         | CPDB    | CPDB            |

**Model Applicability**

Unknown features are fingerprint features in the query molecule, but not found or appearing too infrequently in the training set.

1. All properties and OPS components are within expected ranges.

**Feature Contribution****Top features for positive contribution**

| Fingerprint | Bit/Smiles | Feature Structure | Score |
|-------------|------------|-------------------|-------|
| FCFP_6      | 32         | <br>[*]Cl         | 0.154 |

|                                               |                   |                                                                                                                                                                            |              |
|-----------------------------------------------|-------------------|----------------------------------------------------------------------------------------------------------------------------------------------------------------------------|--------------|
| FCFP_6                                        | 203677720         | <p>AND Enantiomer</p> 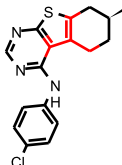 <p><chem>[*]C[c]1:[c]([*]):[*]:[*]:[c]:1:[*]</chem></p>          | 0.137        |
| FCFP_6                                        | 307419094         | <p>AND Enantiomer</p>  <p><chem>[*][c](:[*]):[c]1:[c]([*]):[*]:[*]:[c]:1:[*]</chem></p> | 0.121        |
| <b>Top Features for negative contribution</b> |                   |                                                                                                                                                                            |              |
| <b>Fingerprint</b>                            | <b>Bit/Smiles</b> | <b>Feature Structure</b>                                                                                                                                                   | <b>Score</b> |
| FCFP_6                                        | 16                | <p>AND Enantiomer</p>  <p><chem>[*][c](:[*]):[*]</chem></p>                             | -0.354       |
| FCFP_6                                        | 590925877         | <p>AND Enantiomer</p>  <p><chem>[*]N[c](:[cH]:[*]):[c]H:[*]</chem></p>                | -0.323       |
| FCFP_6                                        | 17                | <p>AND Enantiomer</p>  <p><chem>[*]:s:[*]</chem></p>                                  | -0.149       |



5b

TOPKAT\_Carcinogenic\_Potency\_TD50\_Rat

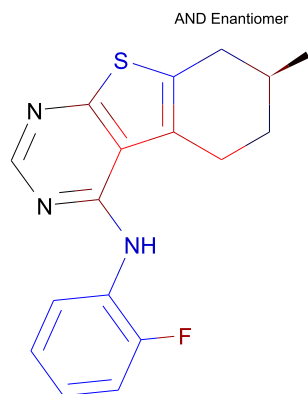

$C_{17}H_{16}FN_3S$   
 Molecular Weight: 313.39244  
 ALogP: 5.041  
 Rotatable Bonds: 2  
 Acceptors: 3  
 Donors: 1

### Model Prediction

Prediction: 10.5  
 Unit: mg/kg\_body\_weight/day  
 Mahalanobis Distance: 18.6  
 Mahalanobis Distance p-value: 1.03e-023

Mahalanobis Distance: The Mahalanobis distance (MD) is a generalization of the Euclidean distance that accounts for correlations among the X properties. It is calculated as the distance to the center of the training data. The larger the MD, the less trustworthy the prediction.

Mahalanobis Distance p-value: The p-value gives the fraction of training data with an MD greater than or equal to the one for the given sample, assuming normally distributed data. The smaller the p-value, the less trustworthy the prediction. For highly non-normal X properties (e.g., fingerprints), the MD p-value is wildly inaccurate.

### Structural Similar Compounds

| Name                        | Indomethacin | 45      | Phenolphthalein |
|-----------------------------|--------------|---------|-----------------|
| Structure                   |              |         |                 |
| Actual Endpoint (-log C)    | 5.49293      | 3.92659 | 2.54766         |
| Predicted Endpoint (-log C) | 4.9569       | 3.28325 | 3.7508          |
| Distance                    | 0.627        | 0.628   | 0.630           |
| Reference                   | CPDB         | CPDB    | CPDB            |

### Model Applicability

Unknown features are fingerprint features in the query molecule, but not found or appearing too infrequently in the training set.

1. All properties and OPS components are within expected ranges.

### Feature Contribution

#### Top features for positive contribution

| Fingerprint | Bit/Smiles | Feature Structure                  | Score |
|-------------|------------|------------------------------------|-------|
| FCFP_6      | 32         | <p>AND Enantiomer</p> <p>[*]Cl</p> | 0.154 |



|                                               |                   |                                                                                                                                                                            |              |
|-----------------------------------------------|-------------------|----------------------------------------------------------------------------------------------------------------------------------------------------------------------------|--------------|
| FCFP_6                                        | 203677720         | <p>AND Enantiomer</p> 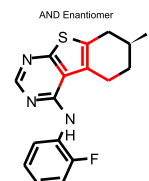 <p><chem>[*]C[c]1:[c]([*]):[*]:[*]:[c]:1:[*]</chem></p>           | 0.137        |
| FCFP_6                                        | 307419094         | <p>AND Enantiomer</p>  <p><chem>[*][c](:[*]):[c]1:[c]([*]):[*]:[*]:[c]:1:[*]</chem></p> | 0.121        |
| <b>Top Features for negative contribution</b> |                   |                                                                                                                                                                            |              |
| <b>Fingerprint</b>                            | <b>Bit/Smiles</b> | <b>Feature Structure</b>                                                                                                                                                   | <b>Score</b> |
| FCFP_6                                        | 991735244         | <p>AND Enantiomer</p>  <p><chem>[*][c]1:[*]:[cH]:[cH]:[cH]:[cH]:1</chem></p>            | -0.422       |
| FCFP_6                                        | 16                | <p>AND Enantiomer</p>  <p><chem>[*][c](:[*]):[*]</chem></p>                           | -0.354       |
| FCFP_6                                        | 590925877         | <p>AND Enantiomer</p>  <p><chem>[*]N[c](:[cH]:[*]):[cH]:[*]</chem></p>                | -0.323       |



5c

TOPKAT\_Carcinogenic\_Potency\_TD50\_Rat

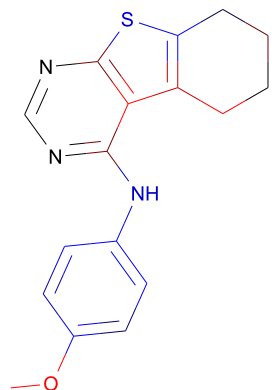C<sub>17</sub>H<sub>17</sub>N<sub>3</sub>OS

Molecular Weight: 311.40138

ALogP: 4.568

Rotatable Bonds: 3

Acceptors: 4

Donors: 1

### Model Prediction

Prediction: 1.42

Unit: mg/kg\_body\_weight/day

Mahalanobis Distance: 16.7

Mahalanobis Distance p-value: 1.26e-016

Mahalanobis Distance: The Mahalanobis distance (MD) is a generalization of the Euclidean distance that accounts for correlations among the X properties. It is calculated as the distance to the center of the training data. The larger the MD, the less trustworthy the prediction.

Mahalanobis Distance p-value: The p-value gives the fraction of training data with an MD greater than or equal to the one for the given sample, assuming normally distributed data. The smaller the p-value, the less trustworthy the predictor. For highly non-normal X properties (e.g., fingerprints), the MD p-value is wildly inaccurate.

### Structural Similar Compounds

| Name                        | Indomethacin | Phenolphthalein | 646     |
|-----------------------------|--------------|-----------------|---------|
| Structure                   |              |                 |         |
| Actual Endpoint (-log C)    | 5.49293      | 2.54766         | 2.41938 |
| Predicted Endpoint (-log C) | 4.9569       | 3.7508          | 3.77987 |
| Distance                    | 0.556        | 0.608           | 0.627   |
| Reference                   | CPDB         | CPDB            | CPDB    |

### Model Applicability

Unknown features are fingerprint features in the query molecule, but not found or appearing too infrequently in the training set.

1. All properties and OPS components are within expected ranges.

### Feature Contribution

#### Top features for positive contribution

| Fingerprint | Bit/Smiles | Feature Structure | Score |
|-------------|------------|-------------------|-------|
| FCFP_6      | 136627117  | <br>[*]OC         | 0.69  |

|                                               |                   |                                                                                                                                     |              |
|-----------------------------------------------|-------------------|-------------------------------------------------------------------------------------------------------------------------------------|--------------|
| FCFP_6                                        | 1                 | 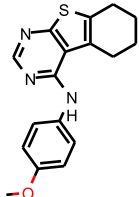<br>[*]O[*]                                      | 0.234        |
| FCFP_6                                        | 203677720         | <br>[*]C[c]1:[c]([*]):[*]<br>:[*]:[c]:1:[*]      | 0.137        |
| <b>Top Features for negative contribution</b> |                   |                                                                                                                                     |              |
| <b>Fingerprint</b>                            | <b>Bit/Smiles</b> | <b>Feature Structure</b>                                                                                                            | <b>Score</b> |
| FCFP_6                                        | 16                | <br>[*][c](:[*]):[*]                             | -0.354       |
| FCFP_6                                        | 590925877         | <br>[*]N[c](:[cH]:[*]):[c<br>H]:[*]            | -0.323       |
| FCFP_6                                        | 1674451008        | <br>[*]O[c]1:[cH]:[*]:[c]<br>([*]):[cH]:[cH]:1 | -0.233       |



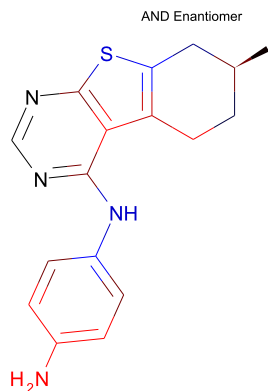

$C_{17}H_{18}N_4S$

Molecular Weight: 310.41662

ALogP: 4.089

Rotatable Bonds: 2

Acceptors: 4

Donors: 2

### Model Prediction

Prediction: 2.42

Unit: mg/kg\_body\_weight/day

Mahalanobis Distance: 16.1

Mahalanobis Distance p-value: 1.25e-014

Mahalanobis Distance: The Mahalanobis distance (MD) is a generalization of the Euclidean distance that accounts for correlations among the X properties. It is calculated as the distance to the center of the training data. The larger the MD, the less trustworthy the prediction.

Mahalanobis Distance p-value: The p-value gives the fraction of training data with an MD greater than or equal to the one for the given sample, assuming normally distributed data. The smaller the p-value, the less trustworthy the prediction. For highly non-normal X properties (e.g., fingerprints), the MD p-value is wildly inaccurate.

### Structural Similar Compounds

| Name                        | Phenolphthalein | Indomethacin | 646     |
|-----------------------------|-----------------|--------------|---------|
| Structure                   |                 |              |         |
| Actual Endpoint (-log C)    | 2.54766         | 5.49293      | 2.41938 |
| Predicted Endpoint (-log C) | 3.7508          | 4.9569       | 3.77987 |
| Distance                    | 0.570           | 0.664        | 0.682   |
| Reference                   | CPDB            | CPDB         | CPDB    |

### Model Applicability

Unknown features are fingerprint features in the query molecule, but not found or appearing too infrequently in the training set.

1. All properties and OPS components are within expected ranges.

### Feature Contribution

#### Top features for positive contribution

| Fingerprint | Bit/Smiles  | Feature Structure                                | Score |
|-------------|-------------|--------------------------------------------------|-------|
| FCFP_6      | -1247245120 | <br><chem>N[c]1:[cH]:[cH]:[*]:[cH]:[cH]:1</chem> | 0.375 |

|                                               |                   |                                                                                                                                                                       |              |
|-----------------------------------------------|-------------------|-----------------------------------------------------------------------------------------------------------------------------------------------------------------------|--------------|
| FCFP_6                                        | 203677720         | <p>AND Enantiomer</p> 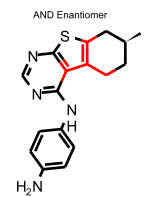 <p><chem>[*]C[c]1:[c]([*]):[*]:[*]:[c]:1:[*]</chem></p>      | 0.137        |
| FCFP_6                                        | 307419094         | <p>AND Enantiomer</p>  <p><chem>[*][c]([*]):[c]1:[c]([*]):[*]:[c]:1:[*]</chem></p> | 0.121        |
| <b>Top Features for negative contribution</b> |                   |                                                                                                                                                                       |              |
| <b>Fingerprint</b>                            | <b>Bit/Smiles</b> | <b>Feature Structure</b>                                                                                                                                              | <b>Score</b> |
| FCFP_6                                        | 16                | <p>AND Enantiomer</p>  <p><chem>[*][c]([*]):[*]:[*]</chem></p>                     | -0.354       |
| FCFP_6                                        | 590925877         | <p>AND Enantiomer</p>  <p><chem>[*]N[c]([*]):[c]H:[*]:[c]H:[*]</chem></p>        | -0.323       |
| FCFP_6                                        | 17                | <p>AND Enantiomer</p>  <p><chem>[*]:s:[*]</chem></p>                             | -0.149       |





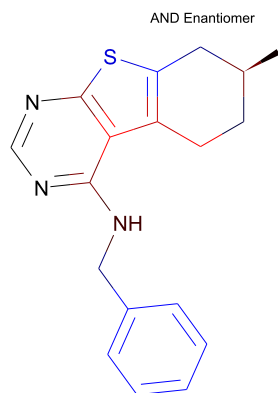

$C_{18}H_{19}N_3S$

Molecular Weight: 309.42856

ALogP: 4.678

Rotatable Bonds: 3

Acceptors: 3

Donors: 1

### Model Prediction

Prediction: 29.9

Unit: mg/kg\_body\_weight/day

Mahalanobis Distance: 17.2

Mahalanobis Distance p-value: 3.34e-018

Mahalanobis Distance: The Mahalanobis distance (MD) is a generalization of the Euclidean distance that accounts for correlations among the X properties. It is calculated as the distance to the center of the training data. The larger the MD, the less trustworthy the prediction.

Mahalanobis Distance p-value: The p-value gives the fraction of training data with an MD greater than or equal to the one for the given sample, assuming normally distributed data. The smaller the p-value, the less trustworthy the prediction. For highly non-normal X properties (e.g., fingerprints), the MD p-value is wildly inaccurate.

### Structural Similar Compounds

| Name                        | Phenolphthalein | Nafenopin s | Indomethacin |
|-----------------------------|-----------------|-------------|--------------|
| Structure                   |                 |             |              |
| Actual Endpoint (-log C)    | 2.54766         | 4.45051     | 5.49293      |
| Predicted Endpoint (-log C) | 3.7508          | 3.8403      | 4.9569       |
| Distance                    | 0.613           | 0.617       | 0.622        |
| Reference                   | CPDB            | CPDB        | CPDB         |

### Model Applicability

Unknown features are fingerprint features in the query molecule, but not found or appearing too infrequently in the training set.

1. All properties and OPS components are within expected ranges.

### Feature Contribution

#### Top features for positive contribution

| Fingerprint | Bit/Smiles | Feature Structure                                    | Score |
|-------------|------------|------------------------------------------------------|-------|
| FCFP_6      | 203677720  | <br><chem>[*]C[c]1:[c]([*]):[*]:[*]:[c]:1:[*]</chem> | 0.137 |

|                                               |                   |                                                                                                                                                                            |              |
|-----------------------------------------------|-------------------|----------------------------------------------------------------------------------------------------------------------------------------------------------------------------|--------------|
| FCFP_6                                        | 307419094         | <p>AND Enantiomer</p> 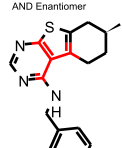 <p><chem>[*][c](:[*]):[c]1:[c]([*]):[*]:[*]:[c]:1:[*]</chem></p> | 0.121        |
| FCFP_6                                        | -1272798659       | <p>AND Enantiomer</p>  <p><chem>[*]CCC([*])[*]</chem></p>                               | 0.11         |
| <b>Top Features for negative contribution</b> |                   |                                                                                                                                                                            |              |
| <b>Fingerprint</b>                            | <b>Bit/Smiles</b> | <b>Feature Structure</b>                                                                                                                                                   | <b>Score</b> |
| FCFP_6                                        | 991735244         | <p>AND Enantiomer</p>  <p><chem>[*][c]1:[*]:[cH]:[cH]:[cH]:[cH]:1</chem></p>            | -0.422       |
| FCFP_6                                        | -2093839777       | <p>AND Enantiomer</p>  <p><chem>[*][c]1:[cH]:[cH]:[cH]:[cH]:[cH]:[cH]:1</chem></p>    | -0.378       |
| FCFP_6                                        | 16                | <p>AND Enantiomer</p>  <p><chem>[*][c](:[*]):[*]</chem></p>                           | -0.354       |



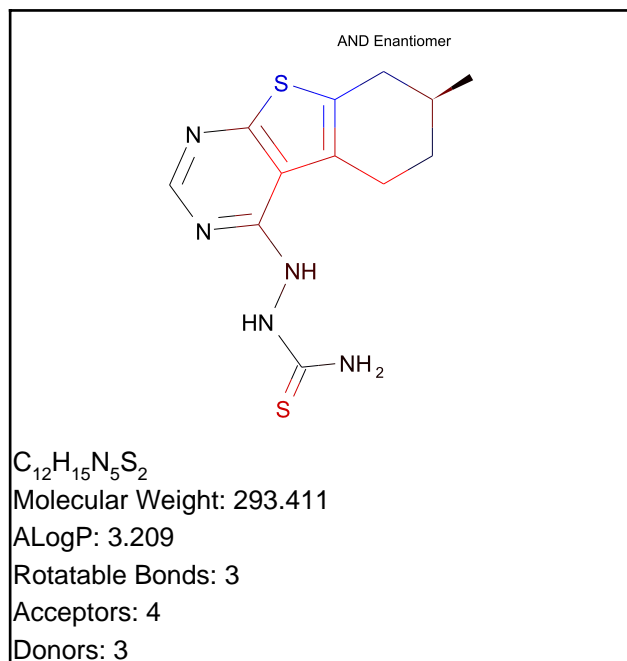

### Model Prediction

Prediction: 10

Unit: mg/kg\_body\_weight/day

Mahalanobis Distance: 15.5

Mahalanobis Distance p-value: 1.05e-012

Mahalanobis Distance: The Mahalanobis distance (MD) is a generalization of the Euclidean distance that accounts for correlations among the X properties. It is calculated as the distance to the center of the training data. The larger the MD, the less trustworthy the prediction.

Mahalanobis Distance p-value: The p-value gives the fraction of training data with an MD greater than or equal to the one for the given sample, assuming normally distributed data. The smaller the p-value, the less trustworthy the prediction. For highly non-normal X properties (e.g., fingerprints), the MD p-value is wildly inaccurate.

### Structural Similar Compounds

| Name                        | 1,2-Dihydro-2-(5-nitro-2-thi-enyl) quinazolin-4(3H)-one                             | 2-Hydrazino-4-(p-nitrophenyl) thiazole                                              | Purpurin                                                                            |
|-----------------------------|-------------------------------------------------------------------------------------|-------------------------------------------------------------------------------------|-------------------------------------------------------------------------------------|
| Structure                   | 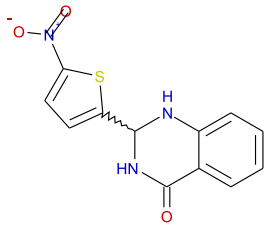 |  |  |
| Actual Endpoint (-log C)    | 5.25509                                                                             | 4.86687                                                                             | 2.57737                                                                             |
| Predicted Endpoint (-log C) | 3.89291                                                                             | 5.14723                                                                             | 3.49183                                                                             |
| Distance                    | 0.622                                                                               | 0.670                                                                               | 0.681                                                                               |
| Reference                   | CPDB                                                                                | CPDB                                                                                | CPDB                                                                                |

### Model Applicability

Unknown features are fingerprint features in the query molecule, but not found or appearing too infrequently in the training set.

- All properties and OPS components are within expected ranges.

### Feature Contribution

#### Top features for positive contribution

| Fingerprint | Bit/Smiles | Feature Structure                                                                                                          | Score |
|-------------|------------|----------------------------------------------------------------------------------------------------------------------------|-------|
| FCFP_6      | 1          | <p>AND Enantiomer</p> 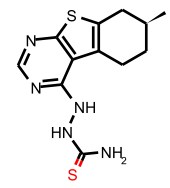 <p>[*]O[*]</p> | 0.234 |

|                                               |                   |                                                                                                                                                                            |              |
|-----------------------------------------------|-------------------|----------------------------------------------------------------------------------------------------------------------------------------------------------------------------|--------------|
| FCFP_6                                        | 203677720         | <p>AND Enantiomer</p>  <p><chem>[*]C[c]1:[c]([*]):[*]:[*]:[c]:1[*]</chem></p>            | 0.137        |
| FCFP_6                                        | 307419094         | <p>AND Enantiomer</p>  <p><chem>[*][c](:[*]):[c]1:[c]([*]):[*]:[*]:[c]:1:[*]</chem></p> | 0.121        |
| <b>Top Features for negative contribution</b> |                   |                                                                                                                                                                            |              |
| <b>Fingerprint</b>                            | <b>Bit/Smiles</b> | <b>Feature Structure</b>                                                                                                                                                   | <b>Score</b> |
| FCFP_6                                        | 16                | <p>AND Enantiomer</p>  <p><chem>[*][c](:[*]):[*]</chem></p>                             | -0.354       |
| FCFP_6                                        | 17                | <p>AND Enantiomer</p>  <p><chem>[*]:s:[*]</chem></p>                                  | -0.149       |
| FCFP_6                                        | 0                 | <p>AND Enantiomer</p>  <p><chem>[*]C[*]</chem></p>                                    | -0.115       |



9a

TOPKAT\_Carcinogenic\_Potency\_TD50\_Rat

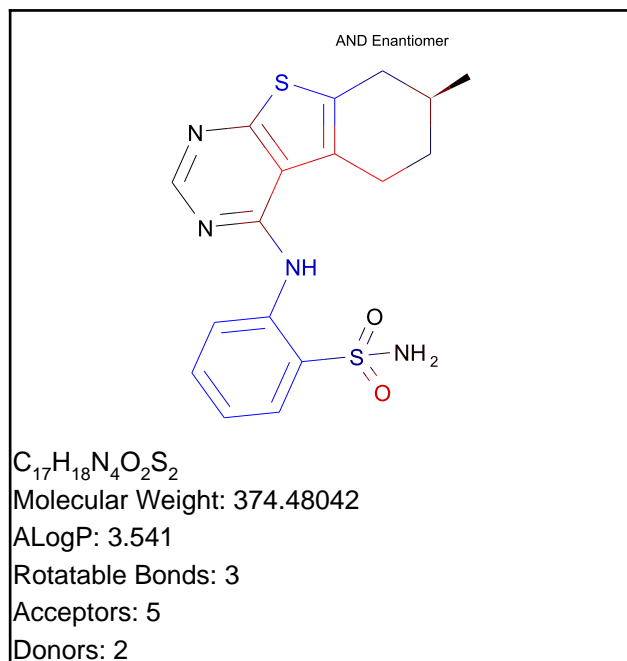**Model Prediction**

Prediction: 29.3

Unit: mg/kg\_body\_weight/day

Mahalanobis Distance: 17

Mahalanobis Distance p-value: 1.11e-017

Mahalanobis Distance: The Mahalanobis distance (MD) is a generalization of the Euclidean distance that accounts for correlations among the X properties. It is calculated as the distance to the center of the training data. The larger the MD, the less trustworthy the prediction.

Mahalanobis Distance p-value: The p-value gives the fraction of training data with an MD greater than or equal to the one for the given sample, assuming normally distributed data. The smaller the p-value, the less trustworthy the prediction. For highly non-normal X properties (e.g., fingerprints), the MD p-value is wildly inaccurate.

**Structural Similar Compounds**

| Name                        | 4-(2-Hydroxyethylamino)-2-(5-nitro-2-thienyl)quinazoline                            | 1,2-Dihydro-2-(5-nitro-2-thienyl)quinazolin-4(3H)-one                               | 542                                                                                 |
|-----------------------------|-------------------------------------------------------------------------------------|-------------------------------------------------------------------------------------|-------------------------------------------------------------------------------------|
| Structure                   | 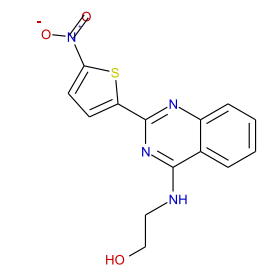 |  |  |
| Actual Endpoint (-log C)    | 5.22831                                                                             | 5.25509                                                                             | 6.59334                                                                             |
| Predicted Endpoint (-log C) | 4.31976                                                                             | 3.89291                                                                             | 5.06501                                                                             |
| Distance                    | 0.622                                                                               | 0.662                                                                               | 0.693                                                                               |
| Reference                   | CPDB                                                                                | CPDB                                                                                | CPDB                                                                                |

**Model Applicability**

Unknown features are fingerprint features in the query molecule, but not found or appearing too infrequently in the training set.

- All properties and OPS components are within expected ranges.

**Feature Contribution****Top features for positive contribution**

| Fingerprint | Bit/Smiles | Feature Structure                                                                                                          | Score |
|-------------|------------|----------------------------------------------------------------------------------------------------------------------------|-------|
| FCFP_6      | 1          | <p>AND Enantiomer</p> 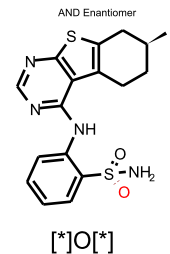 <p>[*]O[*]</p> | 0.234 |

|                                               |                   |                                                                                                                                                                            |              |
|-----------------------------------------------|-------------------|----------------------------------------------------------------------------------------------------------------------------------------------------------------------------|--------------|
| FCFP_6                                        | 203677720         | <p>AND Enantiomer</p> 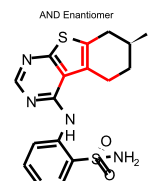 <p><chem>[*]C[c]1:[c]([*]):[*]:[*]:[c]:1:[*]</chem></p>           | 0.137        |
| FCFP_6                                        | 307419094         | <p>AND Enantiomer</p>  <p><chem>[*][c](:[*]):[c]1:[c]([*]):[*]:[*]:[c]:1:[*]</chem></p> | 0.121        |
| <b>Top Features for negative contribution</b> |                   |                                                                                                                                                                            |              |
| <b>Fingerprint</b>                            | <b>Bit/Smiles</b> | <b>Feature Structure</b>                                                                                                                                                   | <b>Score</b> |
| FCFP_6                                        | 991735244         | <p>AND Enantiomer</p>  <p><chem>[*][c]1:[*]:[cH]:[cH]:[cH]:[cH]:1</chem></p>            | -0.422       |
| FCFP_6                                        | 16                | <p>AND Enantiomer</p>  <p><chem>[*][c](:[*]):[*]</chem></p>                           | -0.354       |
| FCFP_6                                        | 590925877         | <p>AND Enantiomer</p>  <p><chem>[*]N[c](:[cH]:[*]):[cH]:[*]</chem></p>                | -0.323       |





9b

TOPKAT\_Carcinogenic\_Potency\_TD50\_Rat

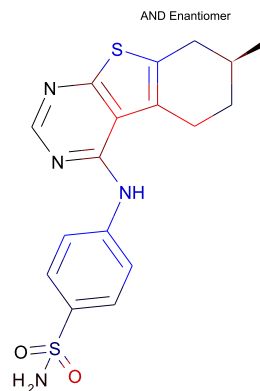C<sub>17</sub>H<sub>18</sub>N<sub>4</sub>O<sub>2</sub>S<sub>2</sub>

Molecular Weight: 374.48042

ALogP: 3.541

Rotatable Bonds: 3

Acceptors: 5

Donors: 2

**Model Prediction**

Prediction: 10.7

Unit: mg/kg\_body\_weight/day

Mahalanobis Distance: 16.8

Mahalanobis Distance p-value: 4.07e-017

Mahalanobis Distance: The Mahalanobis distance (MD) is a generalization of the Euclidean distance that accounts for correlations among the X properties. It is calculated as the distance to the center of the training data. The larger the MD, the less trustworthy the prediction.

Mahalanobis Distance p-value: The p-value gives the fraction of training data with an MD greater than or equal to the one for the given sample, assuming normally distributed data. The smaller the p-value, the less trustworthy the prediction. For highly non-normal X properties (e.g., fingerprints), the MD p-value is wildly inaccurate.

**Structural Similar Compounds**

| Name                        | 4-(2-Hydroxyethylamino)-2-(5-nitro-2-thienyl)quinazoline | 1,2-Dihydro-2-(5-nitro-2-thienyl)quinazolin-4(3H)-one | Omeprazole |
|-----------------------------|----------------------------------------------------------|-------------------------------------------------------|------------|
| Structure                   |                                                          |                                                       |            |
| Actual Endpoint (-log C)    | 5.22831                                                  | 5.25509                                               | 3.4628     |
| Predicted Endpoint (-log C) | 4.31976                                                  | 3.89291                                               | 4.7324     |
| Distance                    | 0.626                                                    | 0.678                                                 | 0.701      |
| Reference                   | CPDB                                                     | CPDB                                                  | CPDB       |

**Model Applicability**

Unknown features are fingerprint features in the query molecule, but not found or appearing too infrequently in the training set.

- All properties and OPS components are within expected ranges.

**Feature Contribution****Top features for positive contribution**

| Fingerprint | Bit/Smiles | Feature Structure | Score |
|-------------|------------|-------------------|-------|
| FCFP_6      | 1          | <br>[*]O[*]       | 0.234 |

|                                               |                   |                                                                                                                                                                        |              |
|-----------------------------------------------|-------------------|------------------------------------------------------------------------------------------------------------------------------------------------------------------------|--------------|
| FCFP_6                                        | 203677720         | <p>AND Enantiomer</p> 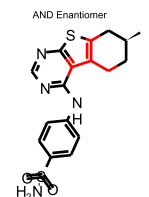 <p>[*]C[c]1:[c]([*]):[*]<br/>:[*]:[c]:1:[*]</p>               | 0.137        |
| FCFP_6                                        | 307419094         | <p>AND Enantiomer</p>  <p>[*][c]([*]):[c]1:[c]<br/>([*]):[*]:[*]:[c]:1:<br/>[*]</p> | 0.121        |
| <b>Top Features for negative contribution</b> |                   |                                                                                                                                                                        |              |
| <b>Fingerprint</b>                            | <b>Bit/Smiles</b> | <b>Feature Structure</b>                                                                                                                                               | <b>Score</b> |
| FCFP_6                                        | 16                | <p>AND Enantiomer</p>  <p>[*][c](:[*]):[*]</p>                                      | -0.354       |
| FCFP_6                                        | 590925877         | <p>AND Enantiomer</p>  <p>[*]N[c](:[cH]:[*]):[c]<br/>H]:[*]</p>                   | -0.323       |
| FCFP_6                                        | 17                | <p>AND Enantiomer</p>  <p>[*]:s:[*]</p>                                           | -0.149       |



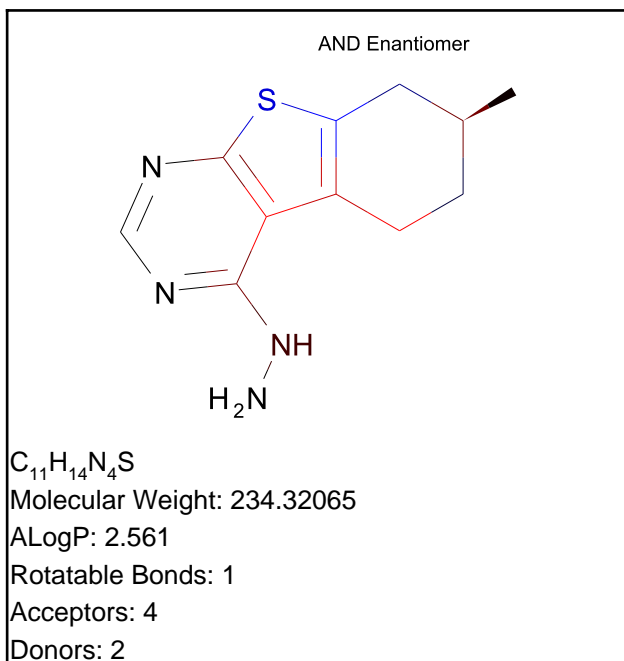

### Model Prediction

Prediction: 9.15

Unit: mg/kg\_body\_weight/day

Mahalanobis Distance: 16

Mahalanobis Distance p-value: 2.28e-014

Mahalanobis Distance: The Mahalanobis distance (MD) is a generalization of the Euclidean distance that accounts for correlations among the X properties. It is calculated as the distance to the center of the training data. The larger the MD, the less trustworthy the prediction.

Mahalanobis Distance p-value: The p-value gives the fraction of training data with an MD greater than or equal to the one for the given sample, assuming normally distributed data. The smaller the p-value, the less trustworthy the prediction. For highly non-normal X properties (e.g., fingerprints), the MD p-value is wildly inaccurate.

### Structural Similar Compounds

| Name                        | Chrysazin                                                                           | 215                                                                                 | 1,2-Dihydro-2-(5-nitro-2-thi-enyl) quinazolin-4(3H)-one                             |
|-----------------------------|-------------------------------------------------------------------------------------|-------------------------------------------------------------------------------------|-------------------------------------------------------------------------------------|
| Structure                   | 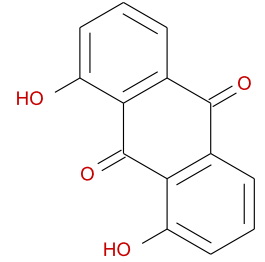 |  |  |
| Actual Endpoint (-log C)    | 2.99143                                                                             | 2.84742                                                                             | 5.25509                                                                             |
| Predicted Endpoint (-log C) | 3.29868                                                                             | 3.32496                                                                             | 3.89291                                                                             |
| Distance                    | 0.552                                                                               | 0.594                                                                               | 0.604                                                                               |
| Reference                   | CPDB                                                                                | CPDB                                                                                | CPDB                                                                                |

### Model Applicability

Unknown features are fingerprint features in the query molecule, but not found or appearing too infrequently in the training set.

- All properties and OPS components are within expected ranges.

### Feature Contribution

#### Top features for positive contribution

| Fingerprint | Bit/Smiles | Feature Structure                                                                                                                                                                                                   | Score |
|-------------|------------|---------------------------------------------------------------------------------------------------------------------------------------------------------------------------------------------------------------------|-------|
| FCFP_6      | 203677720  | <p style="text-align: center;">AND Enantiomer</p> 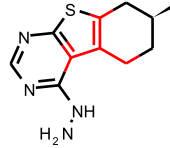 <p style="text-align: center;">[*]C[c]1:[c]([*]):[*]<br/>:[*]:[c]:1:[*]</p> | 0.137 |

|                                               |                   |                                                                                                                                                                        |              |
|-----------------------------------------------|-------------------|------------------------------------------------------------------------------------------------------------------------------------------------------------------------|--------------|
| FCFP_6                                        | 307419094         | <p>AND Enantiomer</p> 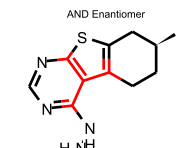 <p>[*][c](:[*]):[c]1:[c]<br/>([*]):[*]:[*]:[c]:1:<br/>[*]</p> | 0.121        |
| FCFP_6                                        | -1272798659       | <p>AND Enantiomer</p>  <p>[*]CCC([*])[*]</p>                                        | 0.11         |
| <b>Top Features for negative contribution</b> |                   |                                                                                                                                                                        |              |
| <b>Fingerprint</b>                            | <b>Bit/Smiles</b> | <b>Feature Structure</b>                                                                                                                                               | <b>Score</b> |
| FCFP_6                                        | 16                | <p>AND Enantiomer</p>  <p>[*][c](:[*]):[*]</p>                                      | -0.354       |
| FCFP_6                                        | 17                | <p>AND Enantiomer</p>  <p>[*]:s:[*]</p>                                           | -0.149       |
| FCFP_6                                        | 0                 | <p>AND Enantiomer</p>  <p>[*]C[*]</p>                                             | -0.115       |



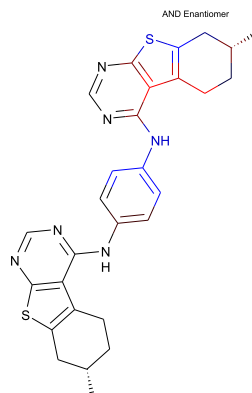
 $C_{28}H_{28}N_6S_2$ 

Molecular Weight: 512.69212

ALogP: 7.842

Rotatable Bonds: 4

Acceptors: 6

Donors: 2

### Model Prediction

Prediction: 0.347

Unit: mg/kg\_body\_weight/day

Mahalanobis Distance: 18.2

Mahalanobis Distance p-value: 4.61e-022

Mahalanobis Distance: The Mahalanobis distance (MD) is a generalization of the Euclidean distance that accounts for correlations among the X properties. It is calculated as the distance to the center of the training data. The larger the MD, the less trustworthy the prediction.

Mahalanobis Distance p-value: The p-value gives the fraction of training data with an MD greater than or equal to the one for the given sample, assuming normally distributed data. The smaller the p-value, the less trustworthy the prediction. For highly non-normal X properties (e.g., fingerprints), the MD p-value is wildly inaccurate.

### Structural Similar Compounds

| Name                        | 223     | 411     | Fluvastatin |
|-----------------------------|---------|---------|-------------|
| Structure                   |         |         |             |
| Actual Endpoint (-log C)    | 6.29867 | 3.06566 | 3.51742     |
| Predicted Endpoint (-log C) | 7.5657  | 4.8672  | 5.41573     |
| Distance                    | 1.050   | 1.054   | 1.066       |
| Reference                   | CPDB    | CPDB    | CPDB        |

### Model Applicability

Unknown features are fingerprint features in the query molecule, but not found or appearing too infrequently in the training set.

1. All properties and OPS components are within expected ranges.

### Feature Contribution

#### Top features for positive contribution

| Fingerprint | Bit/Smiles | Feature Structure                                   | Score |
|-------------|------------|-----------------------------------------------------|-------|
| FCFP_6      | 203677720  | <br><chem>[*]C[c]1:[c]([*]):[*]:[*]:[c]:1[*]</chem> | 0.137 |



|                                               |                   |                                                                                                                                                                        |              |
|-----------------------------------------------|-------------------|------------------------------------------------------------------------------------------------------------------------------------------------------------------------|--------------|
| FCFP_6                                        | 307419094         | <p>AND Enantiomer</p> 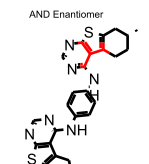 <p>[*][c](:[*]):[c]1:[c]<br/>([*]):[*]:[*]:[c]:1:<br/>[*]</p> | 0.121        |
| FCFP_6                                        | -1272798659       | <p>AND Enantiomer</p>  <p>[*]CCC([*])[*]</p>                                        | 0.11         |
| <b>Top Features for negative contribution</b> |                   |                                                                                                                                                                        |              |
| <b>Fingerprint</b>                            | <b>Bit/Smiles</b> | <b>Feature Structure</b>                                                                                                                                               | <b>Score</b> |
| FCFP_6                                        | 16                | <p>AND Enantiomer</p>  <p>[*][c](:[*]):[*]</p>                                      | -0.354       |
| FCFP_6                                        | 590925877         | <p>AND Enantiomer</p>  <p>[*]N[c](:[cH]:[*]):[c<br/>H]:[*]</p>                    | -0.323       |
| FCFP_6                                        | 17                | <p>AND Enantiomer</p>  <p>[*]:s:[*]</p>                                           | -0.149       |



# Erlotinib

# TOPKAT\_Carcinogenic\_Potency\_TD50\_Rat

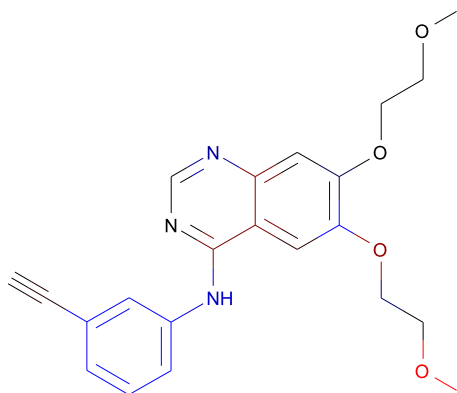

$C_{22}H_{23}N_3O_4$   
 Molecular Weight: 393.43572  
 ALogP: 4.309  
 Rotatable Bonds: 10  
 Acceptors: 7  
 Donors: 1

## Model Prediction

Prediction: 8.06  
 Unit: mg/kg\_body\_weight/day  
 Mahalanobis Distance: 17.7  
 Mahalanobis Distance p-value: 3.99e-020

Mahalanobis Distance: The Mahalanobis distance (MD) is a generalization of the Euclidean distance that accounts for correlations among the X properties. It is calculated as the distance to the center of the training data. The larger the MD, the less trustworthy the prediction.  
 Mahalanobis Distance p-value: The p-value gives the fraction of training data with an MD greater than or equal to the one for the given sample, assuming normally distributed data. The smaller the p-value, the less trustworthy the prediction. For highly non-normal X properties (e.g., fingerprints), the MD p-value is wildly inaccurate.

## Structural Similar Compounds

| Name                        | Loxidine                                                                            | C.I. direct brown 95                                                                | Omeprazole                                                                          |
|-----------------------------|-------------------------------------------------------------------------------------|-------------------------------------------------------------------------------------|-------------------------------------------------------------------------------------|
| Structure                   | 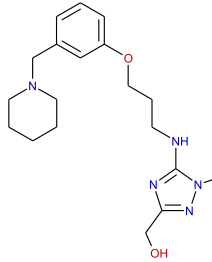 |  |  |
| Actual Endpoint (-log C)    | 2.87532                                                                             | 5.31387                                                                             | 3.4628                                                                              |
| Predicted Endpoint (-log C) | 3.63996                                                                             | 4.30266                                                                             | 4.7324                                                                              |
| Distance                    | 0.685                                                                               | 0.715                                                                               | 0.741                                                                               |
| Reference                   | CPDB                                                                                | CPDB                                                                                | CPDB                                                                                |

## Model Applicability

Unknown features are fingerprint features in the query molecule, but not found or appearing too infrequently in the training set.

- All properties and OPS components are within expected ranges.
- Unknown FCFP\_2 feature: 902193919: [\*]:[c](:[\*])C#C

## Feature Contribution

### Top features for positive contribution

| Fingerprint | Bit/Smiles | Feature Structure                                                                              | Score |
|-------------|------------|------------------------------------------------------------------------------------------------|-------|
| FCFP_6      | 136627117  | 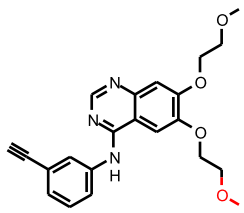<br>[*]OC | 0.69  |

|                                               |                   |                                                                                                                                              |              |
|-----------------------------------------------|-------------------|----------------------------------------------------------------------------------------------------------------------------------------------|--------------|
| FCFP_6                                        | 1                 | 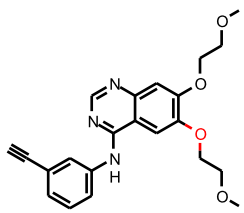<br><chem>[*]O[*]</chem>                                   | 0.234        |
| FCFP_6                                        | 203677720         | <br><chem>[*]C[c]1:[c]([*]):[*]<br/>:[*]:[c]:1:[*]</chem> | 0.137        |
| <b>Top Features for negative contribution</b> |                   |                                                                                                                                              |              |
| <b>Fingerprint</b>                            | <b>Bit/Smiles</b> | <b>Feature Structure</b>                                                                                                                     | <b>Score</b> |
| FCFP_6                                        | 991735244         | <br><chem>[*][c]1:[*]:[cH]:[cH]<br/>:[cH]:[cH]:1</chem>   | -0.422       |
| FCFP_6                                        | 16                | <br><chem>[*][c](:[*]):[*]</chem>                        | -0.354       |
| FCFP_6                                        | 590925877         | <br><chem>[*]N[c](:[cH]:[*]):[c<br/>H]:[*]</chem>       | -0.323       |



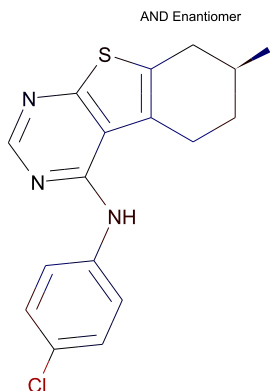

$C_{17}H_{16}ClN_3S$

Molecular Weight: 329.84704

ALogP: 5.5

Rotatable Bonds: 2

Acceptors: 3

Donors: 1

### Model Prediction

Prediction: 0.0375

Unit: g/kg\_body\_weight

Mahalanobis Distance: 33.7

Mahalanobis Distance p-value: 2.01e-031

Mahalanobis Distance: The Mahalanobis distance (MD) is a generalization of the Euclidean distance that accounts for correlations among the X properties. It is calculated as the distance to the center of the training data. The larger the MD, the less trustworthy the prediction.

Mahalanobis Distance p-value: The p-value gives the fraction of training data with an MD greater than or equal to the one for the given sample, assuming normally distributed data. The smaller the p-value, the less trustworthy the prediction. For highly non-normal X properties (e.g., fingerprints), the MD p-value is wildly inaccurate.

### Structural Similar Compounds

| Name                        | BROTIZOLAM                | TRIAZOLAM | C.I. SOLVENT YELLOW 14 |
|-----------------------------|---------------------------|-----------|------------------------|
| Structure                   |                           |           |                        |
| Actual Endpoint (-log C)    | 2.99309                   | 3.83659   | 4.298                  |
| Predicted Endpoint (-log C) | 3.70649                   | 3.85527   | 3.36361                |
| Distance                    | 0.589                     | 0.593     | 0.615                  |
| Reference                   | ARZNEI.FORSCH.36.592.1986 | UPJ-33030 | NTP REPORT # 226       |

### Model Applicability

Unknown features are fingerprint features in the query molecule, but not found or appearing too infrequently in the training set.

1. All properties and OPS components are within expected ranges.
2. Unknown ECFP\_6 feature: 914325265: [\*]:s:[\*]
3. Unknown ECFP\_6 feature: 292958156: [\*]CC(C)C[\*]
4. Unknown ECFP\_6 feature: 53207596: [\*]C[\*]C[c](:[\*]):[\*]
5. Unknown ECFP\_6 feature: -1672647522: [\*]C[c]1:s:[\*]:[\*]:[c]:1[\*]
6. Unknown ECFP\_6 feature: -1660340418: [\*]C[c]1:[c]([\*]):[\*]:[\*]:[c]:1:[\*]
7. Unknown ECFP\_6 feature: 51876938: [\*]CC[c](:[\*]):[\*]
8. Unknown ECFP\_6 feature: 85262808: [\*][c]1:[\*]:[\*]:[c](:[\*]):s:1
9. Unknown ECFP\_6 feature: -1597579789: [\*]:n:[c]1:s:[\*]:[\*]:[c]:1:[\*]
10. Unknown ECFP\_6 feature: -1661653144: [\*][c](:[\*]):[c]1:[c]([\*]):[\*]:[\*]:[c]:1:[\*]
11. Unknown ECFP\_6 feature: 865482986: [\*]C[\*]C
12. Unknown ECFP\_6 feature: -677309799: [\*]:[cH]:n:[c](:[\*]):[\*]
13. Unknown ECFP\_6 feature: -710237522: [\*]:n:[cH]:n:[\*]
14. Unknown ECFP\_6 feature: 1049768340: [\*]N[c](:n:[\*]):[c](:[\*]):[\*]
15. Unknown ECFP\_6 feature: -1242906247: [\*]:[c](:[\*])N[c](:[\*]):[\*]
16. Unknown ECFP\_6 feature: -177077903: [\*]N[c](:[cH]:[\*]):[cH]:[\*]
17. Unknown ECFP\_6 feature: -176494269: [\*]:[cH]:[c](Cl):[cH]:[\*]
18. Unknown ECFP\_6 feature: 99947387: [\*]:[c](:[\*])Cl

## Feature Contribution

| Top features for positive contribution |            |                                                                                                                               |         |
|----------------------------------------|------------|-------------------------------------------------------------------------------------------------------------------------------|---------|
| Fingerprint                            | Bit/Smiles | Feature Structure                                                                                                             | Score   |
| ECFP_6                                 | 167460056  | <p>AND Enantiomer</p> 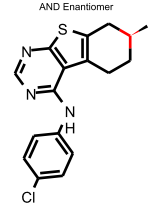 <p>[*]C([*])*</p>   | 0.136   |
| FCFP_6                                 | 32         | <p>AND Enantiomer</p>  <p>[*]Cl</p>        | 0.101   |
| FCFP_6                                 | 3          | <p>AND Enantiomer</p>  <p>[*]N[*]</p>     | 0.0924  |
| Top Features for negative contribution |            |                                                                                                                               |         |
| Fingerprint                            | Bit/Smiles | Feature Structure                                                                                                             | Score   |
| FCFP_6                                 | 136597326  | <p>AND Enantiomer</p>  <p>[*]C([*])C</p> | -0.0815 |

|        |            |                                                                                                                                                              |         |
|--------|------------|--------------------------------------------------------------------------------------------------------------------------------------------------------------|---------|
| FCFP_6 | 203677720  | <p>AND Enantiomer</p> 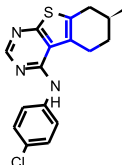 <p>[*]C[c]1:[c]([*]):[*]<br/>:[*]:[c]:1:[*]</p>    | -0.0713 |
| FCFP_6 | -773983804 | <p>AND Enantiomer</p>  <p>[*]N[c]1:[cH]:[*]:[c]<br/>([*]):[cH]:[cH]:1</p> | -0.0589 |



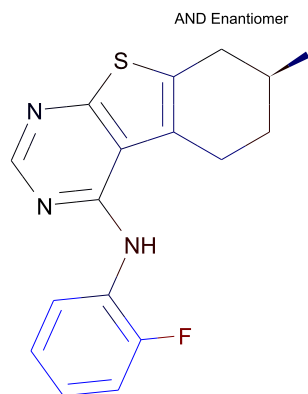

$C_{17}H_{16}FN_3S$   
 Molecular Weight: 313.39244  
 ALogP: 5.041  
 Rotatable Bonds: 2  
 Acceptors: 3  
 Donors: 1

### Model Prediction

Prediction: 0.0746  
 Unit: g/kg\_body\_weight  
 Mahalanobis Distance: 33.4  
 Mahalanobis Distance p-value: 9.75e-031

Mahalanobis Distance: The Mahalanobis distance (MD) is a generalization of the Euclidean distance that accounts for correlations among the X properties. It is calculated as the distance to the center of the training data. The larger the MD, the less trustworthy the prediction.

Mahalanobis Distance p-value: The p-value gives the fraction of training data with an MD greater than or equal to the one for the given sample, assuming normally distributed data. The smaller the p-value, the less trustworthy the prediction. For highly non-normal X properties (e.g., fingerprints), the MD p-value is wildly inaccurate.

### Structural Similar Compounds

| Name                        | BROTIZOLAM                | TRIAZOLAM | C.I. SOLVENT YELLOW 14 |
|-----------------------------|---------------------------|-----------|------------------------|
| Structure                   |                           |           |                        |
| Actual Endpoint (-log C)    | 2.99309                   | 3.83659   | 4.298                  |
| Predicted Endpoint (-log C) | 3.70649                   | 3.85527   | 3.36361                |
| Distance                    | 0.577                     | 0.582     | 0.586                  |
| Reference                   | ARZNEI.FORSCH.36.592.1986 | UPJ-33030 | NTP REPORT # 226       |

### Model Applicability

Unknown features are fingerprint features in the query molecule, but not found or appearing too infrequently in the training set.

1. All properties and OPS components are within expected ranges.
2. Unknown ECFP\_6 feature: 914325265: [\*]:s:[\*]
3. Unknown ECFP\_6 feature: -1046436026: [\*]F
4. Unknown ECFP\_6 feature: 292958156: [\*]CC(C)C[\*]
5. Unknown ECFP\_6 feature: 53207596: [\*]C[\*]C[c](:[\*]):[\*]
6. Unknown ECFP\_6 feature: -1672647522: [\*]C[c]1:s:[\*]:[\*]:[c]:1[\*]
7. Unknown ECFP\_6 feature: -1660340418: [\*]C[c]1:[c]([\*]):[\*]:[\*]:[c]:1[\*]
8. Unknown ECFP\_6 feature: 51876938: [\*]CC[c](:[\*]):[\*]
9. Unknown ECFP\_6 feature: 85262808: [\*][c]1:[\*]:[\*]:[c](:[\*]):s:1
10. Unknown ECFP\_6 feature: -1597579789: [\*]:n:[c]1:s:[\*]:[\*]:[c]:1[\*]
11. Unknown ECFP\_6 feature: -1661653144: [\*][c](:[\*]):[c]1:[c]([\*]):[\*]:[\*]:[c]:1[\*]
12. Unknown ECFP\_6 feature: 865482986: [\*]C[\*]C
13. Unknown ECFP\_6 feature: -677309799: [\*]:[cH]:n:[c](:[\*]):[\*]
14. Unknown ECFP\_6 feature: -710237522: [\*]:n:[cH]:n:[\*]
15. Unknown ECFP\_6 feature: 1049768340: [\*]N[c](:n:[\*]):[c](:[\*]):[\*]
16. Unknown ECFP\_6 feature: -1242906247: [\*]:[c](:[\*])N[c](:[\*]):[\*]
17. Unknown ECFP\_6 feature: 1335108269: [\*]N[c](:[cH]:[\*]):[c]([\*]):[\*]
18. Unknown ECFP\_6 feature: -1311285389: [\*][c](:[\*]):[c](F):[cH]:[\*]
19. Unknown ECFP\_6 feature: 1997021792: [\*]:[cH]:[cH]:[cH]:[\*]

20. Unknown ECFP\_6 feature: 220735655: [\*]:[c](:[\*])F

## Feature Contribution

### Top features for positive contribution

| Fingerprint | Bit/Smiles | Feature Structure                                                                                                             | Score  |
|-------------|------------|-------------------------------------------------------------------------------------------------------------------------------|--------|
| ECFP_6      | -167460056 | <p>AND Enantiomer</p> 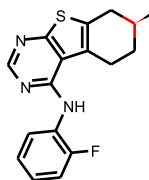 <p>[*]C([*])[*]</p> | 0.136  |
| FCFP_6      | 32         | <p>AND Enantiomer</p>  <p>[*]Cl</p>        | 0.101  |
| FCFP_6      | 3          | <p>AND Enantiomer</p>  <p>[*]N[*]</p>     | 0.0924 |

### Top Features for negative contribution

| Fingerprint | Bit/Smiles | Feature Structure                                                                                                                                         | Score  |
|-------------|------------|-----------------------------------------------------------------------------------------------------------------------------------------------------------|--------|
| FCFP_6      | 991735244  | <p>AND Enantiomer</p> 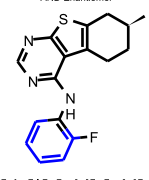 <p>[*][c]1:[*]:[cH]:[cH]<br/>:[cH]:[cH]:1</p> | -0.134 |

|               |                   |                                                                                                                                                                 |                |
|---------------|-------------------|-----------------------------------------------------------------------------------------------------------------------------------------------------------------|----------------|
| <p>ECFP_6</p> | <p>1564392544</p> | <p>AND Enantiomer</p> 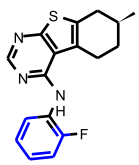 <p><chem>[*][c]1:[*]:[cH]:[cH]:[cH]:[cH]:1</chem></p> | <p>-0.133</p>  |
| <p>FCFP_6</p> | <p>136597326</p>  | <p>AND Enantiomer</p>  <p><chem>[*]C([*])C</chem></p>                        | <p>-0.0815</p> |

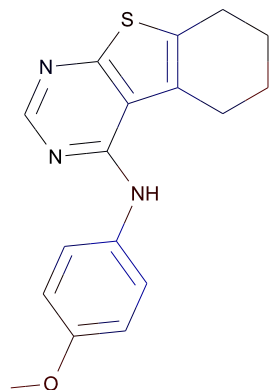

$C_{17}H_{17}N_3OS$   
 Molecular Weight: 311.40138  
 ALogP: 4.568  
 Rotatable Bonds: 3  
 Acceptors: 4  
 Donors: 1

### Model Prediction

Prediction: 0.0486  
 Unit: g/kg\_body\_weight  
 Mahalanobis Distance: 31.8  
 Mahalanobis Distance p-value: 7.04e-028

Mahalanobis Distance: The Mahalanobis distance (MD) is a generalization of the Euclidean distance that accounts for correlations among the X properties. It is calculated as the distance to the center of the training data. The larger the MD, the less trustworthy the prediction.

Mahalanobis Distance p-value: The p-value gives the fraction of training data with an MD greater than or equal to the one for the given sample, assuming normally distributed data. The smaller the p-value, the less trustworthy the prediction. For highly non-normal X properties (e.g., fingerprints), the MD p-value is wildly inaccurate.

### Structural Similar Compounds

| Name                        | C.I. PIGMENT RED 3 | C.I. SOLVENT YELLOW 14 | BROTIZOLAM                |
|-----------------------------|--------------------|------------------------|---------------------------|
| Structure                   |                    |                        |                           |
| Actual Endpoint (-log C)    | 3.0252             | 4.298                  | 2.99309                   |
| Predicted Endpoint (-log C) | 3.34768            | 3.36361                | 3.70649                   |
| Distance                    | 0.548              | 0.614                  | 0.619                     |
| Reference                   | NTP REPORT # 407   | NTP REPORT # 226       | ARZNEI.FORSCH.36.592.1986 |

### Model Applicability

Unknown features are fingerprint features in the query molecule, but not found or appearing too infrequently in the training set.

1. All properties and OPS components are within expected ranges.
2. Unknown ECFP\_6 feature: 914325265: [\*]:s:[\*]
3. Unknown ECFP\_6 feature: -1332781180: [\*]CCC[\*]
4. Unknown ECFP\_6 feature: 51876938: [\*]CC[c](:[\*]):[\*]
5. Unknown ECFP\_6 feature: -1672647522: [\*]C[c]1:s:[\*]:[\*]:[c]:1[\*]
6. Unknown ECFP\_6 feature: -1660340418: [\*]C[c]1:[c]([\*]):[\*]:[\*]:[c]:1:[\*]
7. Unknown ECFP\_6 feature: 85262808: [\*][c]1:[\*]:[\*]:[c](:[\*]):s:1
8. Unknown ECFP\_6 feature: -1597579789: [\*]:n:[c]1:s:[\*]:[\*]:[c]:1:[\*]
9. Unknown ECFP\_6 feature: -1661653144: [\*][c](:[\*]):[c]1:[c]([\*]):[\*]:[\*]:[c]:1:[\*]
10. Unknown ECFP\_6 feature: -677309799: [\*]:[cH]:n:[c](:[\*]):[\*]
11. Unknown ECFP\_6 feature: -710237522: [\*]:n:[cH]:n:[\*]
12. Unknown ECFP\_6 feature: 1049768340: [\*]N[c](:n:[\*]):[c](:[\*]):[\*]
13. Unknown ECFP\_6 feature: -1242906247: [\*]:[c](:[\*])N[c](:[\*]):[\*]
14. Unknown ECFP\_6 feature: -177077903: [\*]N[c](:[cH]):[\*]:[cH]:[\*]
15. Unknown ECFP\_6 feature: 1307307440: [\*]:[c](:[\*])OC

### Feature Contribution

Top features for positive contribution

| Fingerprint                                   | Bit/Smiles | Feature Structure                                                                                                      | Score  |
|-----------------------------------------------|------------|------------------------------------------------------------------------------------------------------------------------|--------|
| ECFP_6                                        | -176455838 | 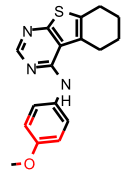<br>[*]O[c](:[cH]:[*]):[c<br>H]:[*] | 0.106  |
| FCFP_6                                        | 3          | <br>[*]N[*]                         | 0.0924 |
| FCFP_6                                        | 1036089772 | <br>[*]:[c](:[*])OC                 | 0.073  |
| <b>Top Features for negative contribution</b> |            |                                                                                                                        |        |
| Fingerprint                                   | Bit/Smiles | Feature Structure                                                                                                      | Score  |
| FCFP_6                                        | 1          | <br>[*]O[*]                       | -0.102 |

|        |            |                                                                                                                                                                            |         |
|--------|------------|----------------------------------------------------------------------------------------------------------------------------------------------------------------------------|---------|
| FCFP_6 | 203677720  | 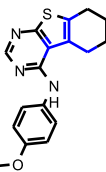<br><chem>Cc1ccc(O)cc1N2C=NC(=S)N2</chem><br>[*]C[c]1:[c]([*]):[*]<br>:[*]:[c]:1:[*]    | -0.0713 |
| FCFP_6 | -773983804 | <br><chem>Cc1ccc(O)cc1N2C=NC(=S)N2</chem><br>[*]N[c]1:[cH]:[*]:[c]<br>([*]):[cH]:[cH]:1 | -0.0589 |

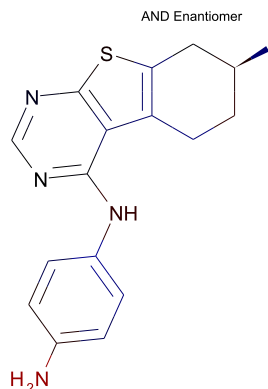

C<sub>17</sub>H<sub>18</sub>N<sub>4</sub>S

Molecular Weight: 310.41662

ALogP: 4.089

Rotatable Bonds: 2

Acceptors: 4

Donors: 2

### Model Prediction

Prediction: 0.063

Unit: g/kg\_body\_weight

Mahalanobis Distance: 33.1

Mahalanobis Distance p-value: 3.04e-030

Mahalanobis Distance: The Mahalanobis distance (MD) is a generalization of the Euclidean distance that accounts for correlations among the X properties. It is calculated as the distance to the center of the training data. The larger the MD, the less trustworthy the prediction.

Mahalanobis Distance p-value: The p-value gives the fraction of training data with an MD greater than or equal to the one for the given sample, assuming normally distributed data. The smaller the p-value, the less trustworthy the prediction. For highly non-normal X properties (e.g., fingerprints), the MD p-value is wildly inaccurate.

### Structural Similar Compounds

| Name                        | PYRIMETHAMINE | C.I. PIGMENT RED 3 | HC BLUE 1        |
|-----------------------------|---------------|--------------------|------------------|
| Structure                   |               |                    |                  |
| Actual Endpoint (-log C)    | 3.99776       | 3.0252             | 3.0323           |
| Predicted Endpoint (-log C) | 4.25218       | 3.34768            | 2.7171           |
| Distance                    | 0.619         | 0.621              | 0.653            |
| Reference                   | NTP 77 55     | NTP REPORT # 407   | NTP REPORT # 222 |

### Model Applicability

Unknown features are fingerprint features in the query molecule, but not found or appearing too infrequently in the training set.

1. All properties and OPS components are within expected ranges.
2. Unknown ECFP\_6 feature: 914325265: [\*]:s:[\*]
3. Unknown ECFP\_6 feature: 292958156: [\*]CC(C)C[\*]
4. Unknown ECFP\_6 feature: 53207596: [\*]C(\*)C[c](:[\*]):[\*]
5. Unknown ECFP\_6 feature: -1672647522: [\*]C[c]1:s:[\*]:[\*]:[c]:1[\*]
6. Unknown ECFP\_6 feature: -1660340418: [\*]C[c]1:[c]([\*]):[\*]:[\*]:[c]:1[\*]
7. Unknown ECFP\_6 feature: 51876938: [\*]CC[c](:[\*]):[\*]
8. Unknown ECFP\_6 feature: 85262808: [\*][c]1:[\*]:[\*]:[c](:[\*]):s:1
9. Unknown ECFP\_6 feature: -1597579789: [\*]:n:[c]1:s:[\*]:[\*]:[c]:1[\*]
10. Unknown ECFP\_6 feature: -1661653144: [\*][c](:[\*]):[c]1:[c]([\*]):[\*]:[\*]:[c]:1[\*]
11. Unknown ECFP\_6 feature: 865482986: [\*]C(\*)C
12. Unknown ECFP\_6 feature: -677309799: [\*]:[cH]:n:[c](:[\*]):[\*]
13. Unknown ECFP\_6 feature: -710237522: [\*]:n:[cH]:n:[\*]
14. Unknown ECFP\_6 feature: 1049768340: [\*]N[c](:n:[\*]):[c](:[\*]):[\*]
15. Unknown ECFP\_6 feature: -1242906247: [\*]:[c](:[\*])N[c](:[\*]):[\*]
16. Unknown ECFP\_6 feature: -177077903: [\*]N[c](:[cH]):[\*]:[cH]:[\*]
17. Unknown ECFP\_6 feature: 971820502: [\*]:[cH]:[c](N):[cH]:[\*]
18. Unknown ECFP\_6 feature: -938530932: [\*]:[c](:[\*])N

### Feature Contribution

| Top features for positive contribution |            |                                                                                                                                 |         |
|----------------------------------------|------------|---------------------------------------------------------------------------------------------------------------------------------|---------|
| Fingerprint                            | Bit/Smiles | Feature Structure                                                                                                               | Score   |
| ECFP_6                                 | 167460056  | <p>AND Enantiomer</p> 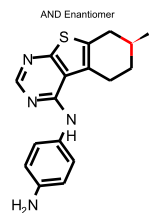 <p>[*]C([*])[*]</p>   | 0.136   |
| FCFP_6                                 | 3          | <p>AND Enantiomer</p>  <p>[*]N[*]</p>        | 0.0924  |
| FCFP_6                                 | 1069584379 | <p>AND Enantiomer</p>  <p>[*]:[c](:[*])N</p> | 0.0717  |
| Top Features for negative contribution |            |                                                                                                                                 |         |
| Fingerprint                            | Bit/Smiles | Feature Structure                                                                                                               | Score   |
| FCFP_6                                 | 136597326  | <p>AND Enantiomer</p>  <p>[*]C([*])C</p>   | -0.0815 |
|                                        |            |                                                                                                                                 |         |



|        |            |                                                                                                                                                                      |         |
|--------|------------|----------------------------------------------------------------------------------------------------------------------------------------------------------------------|---------|
| FCFP_6 | 203677720  | <p>AND Enantiomer</p> 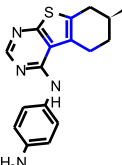 <p><chem>[*]C[c]1:[c]([*]):[*]:[*]:[c]:1:[*]</chem></p>    | -0.0713 |
| FCFP_6 | -773983804 | <p>AND Enantiomer</p>  <p><chem>[*]N[c]1:[cH]:[*]:[c]([*]):[cH]:[cH]:1</chem></p> | -0.0589 |

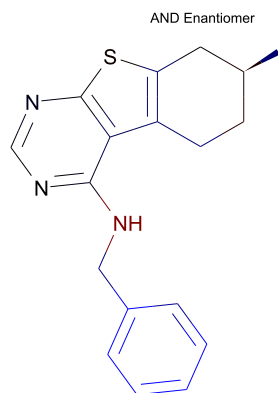

$C_{18}H_{19}N_3S$

Molecular Weight: 309.42856

ALogP: 4.678

Rotatable Bonds: 3

Acceptors: 3

Donors: 1

### Model Prediction

Prediction: 0.0709

Unit: g/kg\_body\_weight

Mahalanobis Distance: 34.6

Mahalanobis Distance p-value: 5.26e-033

Mahalanobis Distance: The Mahalanobis distance (MD) is a generalization of the Euclidean distance that accounts for correlations among the X properties. It is calculated as the distance to the center of the training data. The larger the MD, the less trustworthy the prediction.

Mahalanobis Distance p-value: The p-value gives the fraction of training data with an MD greater than or equal to the one for the given sample, assuming normally distributed data. The smaller the p-value, the less trustworthy the prediction. For highly non-normal X properties (e.g., fingerprints), the MD p-value is wildly inaccurate.

### Structural Similar Compounds

| Name                        | C.I. SOLVENT YELLOW 14 | BROTIZOLAM                | TRIAZOLAM |
|-----------------------------|------------------------|---------------------------|-----------|
| Structure                   |                        |                           |           |
| Actual Endpoint (-log C)    | 4.298                  | 2.99309                   | 3.83659   |
| Predicted Endpoint (-log C) | 3.36361                | 3.70649                   | 3.85527   |
| Distance                    | 0.589                  | 0.597                     | 0.605     |
| Reference                   | NTP REPORT # 226       | ARZNEI.FORSCH.36.592.1986 | UPJ-33030 |

### Model Applicability

Unknown features are fingerprint features in the query molecule, but not found or appearing too infrequently in the training set.

1. All properties and OPS components are within expected ranges.
2. Unknown ECFP\_6 feature: 914325265: [\*]:s:[\*]
3. Unknown ECFP\_6 feature: 292958156: [\*]CC(C)C[\*]
4. Unknown ECFP\_6 feature: 53207596: [\*]C[\*]C[c](:[\*]):[\*]
5. Unknown ECFP\_6 feature: -1672647522: [\*]C[c]1:s:[\*]:[\*]:[c]:1[\*]
6. Unknown ECFP\_6 feature: -1660340418: [\*]C[c]1:[c]([\*]):[\*]:[\*]:[c]:1:[\*]
7. Unknown ECFP\_6 feature: 51876938: [\*]CC[c](:[\*]):[\*]
8. Unknown ECFP\_6 feature: 85262808: [\*][c]1:[\*]:[\*]:[c](:[\*]):s:1
9. Unknown ECFP\_6 feature: -1597579789: [\*]:n:[c]1:s:[\*]:[\*]:[c]:1:[\*]
10. Unknown ECFP\_6 feature: -1661653144: [\*][c](:[\*]):[c]1:[c]([\*]):[\*]:[\*]:[c]:1:[\*]
11. Unknown ECFP\_6 feature: 865482986: [\*]C[\*]C
12. Unknown ECFP\_6 feature: -677309799: [\*]:[cH]:n:[c](:[\*]):[\*]
13. Unknown ECFP\_6 feature: -710237522: [\*]:n:[cH]:n:[\*]
14. Unknown ECFP\_6 feature: 1049768340: [\*]N[c](:n:[\*]):[c](:[\*]):[\*]
15. Unknown ECFP\_6 feature: 491100606: [\*]CN[c](:[\*]):[\*]
16. Unknown ECFP\_6 feature: 769925792: [\*]NC[c](:[\*]):[\*]
17. Unknown ECFP\_6 feature: 1997021792: [\*]:[cH]:[cH]:[cH]:[\*]

### Feature Contribution

| Top features for positive contribution |            |                                                                                                                                                           |        |
|----------------------------------------|------------|-----------------------------------------------------------------------------------------------------------------------------------------------------------|--------|
| Fingerprint                            | Bit/Smiles | Feature Structure                                                                                                                                         | Score  |
| ECFP_6                                 | 167460056  | <p>AND Enantiomer</p> 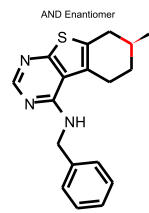 <p>[*]C([*])[*]</p>                             | 0.136  |
| ECFP_6                                 | 1559650422 | <p>AND Enantiomer</p>  <p>[*]C[*]</p>                                  | 0.129  |
| FCFP_6                                 | 3          | <p>AND Enantiomer</p>  <p>[*]N[*]</p>                                  | 0.0924 |
| Top Features for negative contribution |            |                                                                                                                                                           |        |
| Fingerprint                            | Bit/Smiles | Feature Structure                                                                                                                                         | Score  |
| FCFP_6                                 | 991735244  | <p>AND Enantiomer</p>  <p>[*][c]1:[*]:[cH]:[cH]<br/>:[cH]:[cH]:1</p> | -0.134 |

|        |             |                                                                                                                                                           |         |
|--------|-------------|-----------------------------------------------------------------------------------------------------------------------------------------------------------|---------|
| ECFP_6 | 1564392544  | <p>AND Enantiomer</p> 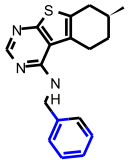 <p>[*][c]1:[*]:[cH]:[cH]<br/>:[cH]:[cH]:1</p>   | -0.133  |
| FCFP_6 | -1698724694 | <p>AND Enantiomer</p>  <p>[*]C[c]1:[cH]:[cH]:[c<br/>H]:[cH]:[cH]:1</p> | -0.0944 |

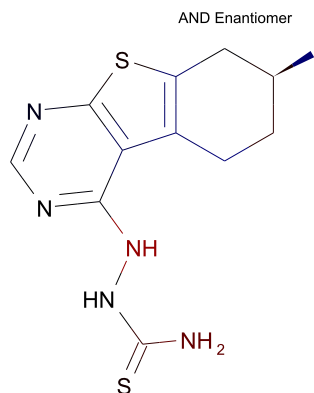

$C_{12}H_{15}N_5S_2$   
 Molecular Weight: 293.411  
 ALogP: 3.209  
 Rotatable Bonds: 3  
 Acceptors: 4  
 Donors: 3

### Model Prediction

Prediction: 0.122  
 Unit: g/kg\_body\_weight  
 Mahalanobis Distance: 31.9  
 Mahalanobis Distance p-value: 5.05e-028

Mahalanobis Distance: The Mahalanobis distance (MD) is a generalization of the Euclidean distance that accounts for correlations among the X properties. It is calculated as the distance to the center of the training data. The larger the MD, the less trustworthy the prediction.

Mahalanobis Distance p-value: The p-value gives the fraction of training data with an MD greater than or equal to the one for the given sample, assuming normally distributed data. The smaller the p-value, the less trustworthy the prediction. For highly non-normal X properties (e.g., fingerprints), the MD p-value is wildly inaccurate.

### Structural Similar Compounds

| Name                        | FUROSEMIDE       | DAPSONE   | PYRIMETHAMINE |
|-----------------------------|------------------|-----------|---------------|
| Structure                   |                  |           |               |
| Actual Endpoint (-log C)    | 4.27645          | 3.6168    | 3.99776       |
| Predicted Endpoint (-log C) | 4.40005          | 3.43657   | 4.25218       |
| Distance                    | 0.623            | 0.702     | 0.707         |
| Reference                   | NTP REPORT # 356 | NTP 20 47 | NTP 77 55     |

### Model Applicability

Unknown features are fingerprint features in the query molecule, but not found or appearing too infrequently in the training set.

1. OPS PC31 out of range. Value: 5.3583. Training min, max, SD, explained variance: -4.0208, 4.2529, 1.246, 0.0068.
2. Unknown FCFP\_2 feature: 1294344583: [\*]NN[c](:[\*]):[\*]
3. Unknown ECFP\_6 feature: 914325265: [\*]:s:[\*]
4. Unknown ECFP\_6 feature: 292958156: [\*]CC(C)C[\*]
5. Unknown ECFP\_6 feature: 53207596: [\*]C(\*)C[c](:[\*]):[\*]
6. Unknown ECFP\_6 feature: -1672647522: [\*]C[c]1:s:[\*]:[\*]:[c]:1[\*]
7. Unknown ECFP\_6 feature: -1660340418: [\*]C[c]1:[c]([\*]):[\*]:[\*]:[c]:1[\*]
8. Unknown ECFP\_6 feature: 51876938: [\*]CC[c](:[\*]):[\*]
9. Unknown ECFP\_6 feature: 85262808: [\*][c]1:[\*]:[\*]:[c](:[\*]):s:1
10. Unknown ECFP\_6 feature: -1597579789: [\*]:n:[c]1:s:[\*]:[\*]:[c]:1[\*]
11. Unknown ECFP\_6 feature: -1661653144: [\*][c](:[\*]):[c]1:[c]([\*]):[\*]:[\*]:[c]:1[\*]
12. Unknown ECFP\_6 feature: 865482986: [\*]C(\*)C
13. Unknown ECFP\_6 feature: -677309799: [\*]:[cH]:n:[c](:[\*]):[\*]
14. Unknown ECFP\_6 feature: -710237522: [\*]:n:[cH]:n:[\*]
15. Unknown ECFP\_6 feature: 1049768340: [\*]N[c](:n:[\*]):[c](:[\*]):[\*]
16. Unknown ECFP\_6 feature: -1238415266: [\*]NN[c](:[\*]):[\*]
17. Unknown ECFP\_6 feature: 1635339976: [\*]NNC(=[\*])[\*]
18. Unknown ECFP\_6 feature: -571028867: [\*]NC(=S)N
19. Unknown ECFP\_6 feature: -932108170: [\*]C(=[\*])N

20. Unknown ECFP\_6 feature: 1979182050: [\*]C(=S)[\*]

## Feature Contribution

### Top features for positive contribution

| Fingerprint | Bit/Smiles | Feature Structure                                                                                                             | Score  |
|-------------|------------|-------------------------------------------------------------------------------------------------------------------------------|--------|
| ECFP_6      | -167460056 | <p>AND Enantiomer</p> 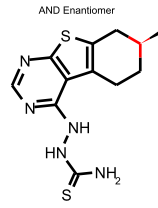 <p>[*]C([*])[*]</p> | 0.136  |
| ECFP_6      | -845108448 | <p>AND Enantiomer</p>  <p>[*]=S</p>        | 0.105  |
| FCFP_6      | 3          | <p>AND Enantiomer</p>  <p>[*]N[*]</p>     | 0.0924 |

### Top Features for negative contribution

| Fingerprint | Bit/Smiles | Feature Structure                                                                                                          | Score  |
|-------------|------------|----------------------------------------------------------------------------------------------------------------------------|--------|
| FCFP_6      | 1          | <p>AND Enantiomer</p> 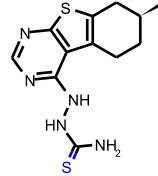 <p>[*]O[*]</p> | -0.102 |

|        |           |                                                                                                                                                           |         |
|--------|-----------|-----------------------------------------------------------------------------------------------------------------------------------------------------------|---------|
| FCFP_6 | 136597326 | <p>AND Enantiomer</p> 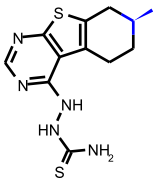 <p>[*]C[*]C</p>                                 | -0.0815 |
| FCFP_6 | 203677720 | <p>AND Enantiomer</p>  <p>[*]C[c]1:[c]([*]):[*]<br/>:[*]:[c]:1:[*]</p> | -0.0713 |

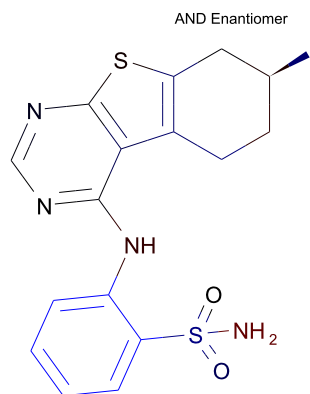

$C_{17}H_{18}N_4O_2S_2$   
 Molecular Weight: 374.48042  
 ALogP: 3.541  
 Rotatable Bonds: 3  
 Acceptors: 5  
 Donors: 2

### Model Prediction

Prediction: 0.323  
 Unit: g/kg\_body\_weight  
 Mahalanobis Distance: 35.3  
 Mahalanobis Distance p-value: 3.24e-034

Mahalanobis Distance: The Mahalanobis distance (MD) is a generalization of the Euclidean distance that accounts for correlations among the X properties. It is calculated as the distance to the center of the training data. The larger the MD, the less trustworthy the prediction.

Mahalanobis Distance p-value: The p-value gives the fraction of training data with an MD greater than or equal to the one for the given sample, assuming normally distributed data. The smaller the p-value, the less trustworthy the prediction. For highly non-normal X properties (e.g., fingerprints), the MD p-value is wildly inaccurate.

### Structural Similar Compounds

| Name                        | D & C RED 9      | CHLORSULFURON                   | FUROSEMIDE       |
|-----------------------------|------------------|---------------------------------|------------------|
| Structure                   |                  |                                 |                  |
| Actual Endpoint (-log C)    | 3.87715          | 4.15566                         | 4.27645          |
| Predicted Endpoint (-log C) | 3.6546           | 3.79771                         | 4.40005          |
| Distance                    | 0.600            | 0.628                           | 0.669            |
| Reference                   | NTP REPORT # 225 | EPA COVER SHEET 0027;880301;(1) | NTP REPORT # 356 |

### Model Applicability

Unknown features are fingerprint features in the query molecule, but not found or appearing too infrequently in the training set.

1. All properties and OPS components are within expected ranges.
2. Unknown ECFP\_6 feature: 914325265: [\*]:s:[\*]
3. Unknown ECFP\_6 feature: -797085356: [\*]S(=[\*])(=[\*])[\*]
4. Unknown ECFP\_6 feature: 292958156: [\*]CC(C)C[\*]
5. Unknown ECFP\_6 feature: 53207596: [\*]C([\*])C[c](:[\*]):[\*]
6. Unknown ECFP\_6 feature: -1672647522: [\*]C[c]1:s:[\*]:[\*]:[c]:1[\*]
7. Unknown ECFP\_6 feature: -1660340418: [\*]C[c]1:[c]([\*]):[\*]:[\*]:[c]:1[\*]
8. Unknown ECFP\_6 feature: 51876938: [\*]CC[c](:[\*]):[\*]
9. Unknown ECFP\_6 feature: 85262808: [\*][c]1:[\*]:[\*]:[c](:[\*]):s:1
10. Unknown ECFP\_6 feature: -1597579789: [\*]:n:[c]1:s:[\*]:[\*]:[c]:1:[\*]
11. Unknown ECFP\_6 feature: -1661653144: [\*][c](:[\*]):[c]1:[c]([\*]):[\*]:[\*]:[c]:1:[\*]
12. Unknown ECFP\_6 feature: 865482986: [\*]C([\*])C
13. Unknown ECFP\_6 feature: -677309799: [\*]:[cH]:n:[c](:[\*]):[\*]
14. Unknown ECFP\_6 feature: -710237522: [\*]:n:[cH]:n:[\*]
15. Unknown ECFP\_6 feature: 1049768340: [\*]N[c](:n:[\*]):[c](:[\*]):[\*]
16. Unknown ECFP\_6 feature: -1242906247: [\*]:[c](:[\*])N[c](:[\*]):[\*]
17. Unknown ECFP\_6 feature: 1335108269: [\*]N[c](:[cH]:[\*]):[c]([\*]):[\*]
18. Unknown ECFP\_6 feature: 1997021792: [\*]:[cH]:[cH]:[cH]:[\*]
19. Unknown ECFP\_6 feature: 1755253401: [\*][c](:[\*]):[c](:[cH]:[\*])S(=[\*])(=[\*])[\*]



20. Unknown ECFP\_6 feature: -2121766239: [\*];[c](:[\*])S(=O)(=O)N  
 21. Unknown ECFP\_6 feature: 2102150379: [\*]S(=[\*])(=O)[\*]  
 22. Unknown ECFP\_6 feature: -934226723: [\*]S(=[\*])(=[\*])N

## Feature Contribution

### Top features for positive contribution

| Fingerprint | Bit/Smiles | Feature Structure                                                                                                             | Score  |
|-------------|------------|-------------------------------------------------------------------------------------------------------------------------------|--------|
| ECFP_6      | -167460056 | <p>AND Enantiomer</p> 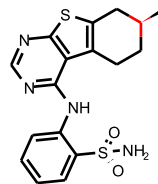 <p>[*]C([*])[*]</p> | 0.136  |
| FCFP_6      | 3          | <p>AND Enantiomer</p>  <p>[*]N[*]</p>      | 0.0924 |
| ECFP_6      | 1572579716 | <p>AND Enantiomer</p>  <p>[*]N</p>        | 0.0576 |

### Top Features for negative contribution

| Fingerprint | Bit/Smiles | Feature Structure | Score |
|-------------|------------|-------------------|-------|
|             |            |                   |       |

|        |            |                                                                                                                                                                 |        |
|--------|------------|-----------------------------------------------------------------------------------------------------------------------------------------------------------------|--------|
| FCFP_6 | 991735244  | <p>AND Enantiomer</p> 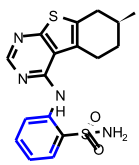 <p><chem>[*][c]1:[*]:[cH]:[cH]:[cH]:[cH]:1</chem></p> | -0.134 |
| ECFP_6 | 1564392544 | <p>AND Enantiomer</p>  <p><chem>[*][c]1:[*]:[cH]:[cH]:[cH]:[cH]:1</chem></p> | -0.133 |
| FCFP_6 | 1          | <p>AND Enantiomer</p>  <p><chem>[*]O[*]</chem></p>                           | -0.102 |

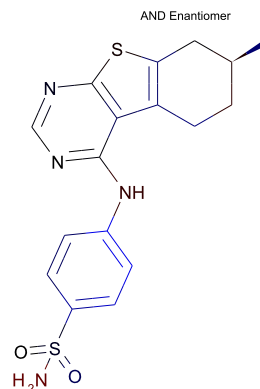

$C_{17}H_{18}N_4O_2S_2$

Molecular Weight: 374.48042

ALogP: 3.541

Rotatable Bonds: 3

Acceptors: 5

Donors: 2

### Model Prediction

Prediction: 0.177

Unit: g/kg\_body\_weight

Mahalanobis Distance: 35.6

Mahalanobis Distance p-value: 1.1e-034

Mahalanobis Distance: The Mahalanobis distance (MD) is a generalization of the Euclidean distance that accounts for correlations among the X properties. It is calculated as the distance to the center of the training data. The larger the MD, the less trustworthy the prediction.

Mahalanobis Distance p-value: The p-value gives the fraction of training data with an MD greater than or equal to the one for the given sample, assuming normally distributed data. The smaller the p-value, the less trustworthy the prediction. For highly non-normal X properties (e.g., fingerprints), the MD p-value is wildly inaccurate.

### Structural Similar Compounds

| Name                        | D & C RED 9      | CHLORSULFURON                   | FUROSEMIDE       |
|-----------------------------|------------------|---------------------------------|------------------|
| Structure                   |                  |                                 |                  |
| Actual Endpoint (-log C)    | 3.87715          | 4.15566                         | 4.27645          |
| Predicted Endpoint (-log C) | 3.6546           | 3.79771                         | 4.40005          |
| Distance                    | 0.609            | 0.641                           | 0.680            |
| Reference                   | NTP REPORT # 225 | EPA COVER SHEET 0027;880301;(1) | NTP REPORT # 356 |

### Model Applicability

Unknown features are fingerprint features in the query molecule, but not found or appearing too infrequently in the training set.

1. OPS PC8 out of range. Value: -5.7967. Training min, max, SD, explained variance: -5.7428, 7.3359, 2.68, 0.0314.
2. Unknown ECFP\_6 feature: 914325265: [\*]:s:[\*]
3. Unknown ECFP\_6 feature: -797085356: [\*]S(=[\*])(=[\*])[\*]
4. Unknown ECFP\_6 feature: 292958156: [\*]CC(C)C[\*]
5. Unknown ECFP\_6 feature: 53207596: [\*]C([\*])C[c](:[\*]):[\*]
6. Unknown ECFP\_6 feature: -1672647522: [\*]C[c]1:s:[\*]:[\*]:[c]:1[\*]
7. Unknown ECFP\_6 feature: -1660340418: [\*]C[c]1:[c]([\*]):[\*]:[\*]:[c]:1[\*]
8. Unknown ECFP\_6 feature: 51876938: [\*]CC[c](:[\*]):[\*]
9. Unknown ECFP\_6 feature: 85262808: [\*][c]1:[\*]:[\*]:[c](:[\*]):s:1
10. Unknown ECFP\_6 feature: -1597579789: [\*]:n:[c]1:s:[\*]:[\*]:[c]:1[\*]
11. Unknown ECFP\_6 feature: -1661653144: [\*][c](:[\*]):[c]1:[c]([\*]):[\*]:[\*]:[c]:1[\*]
12. Unknown ECFP\_6 feature: 865482986: [\*]C([\*])C
13. Unknown ECFP\_6 feature: -677309799: [\*]:[cH]:n:[c](:[\*]):[\*]
14. Unknown ECFP\_6 feature: -710237522: [\*]:n:[cH]:n:[\*]
15. Unknown ECFP\_6 feature: 1049768340: [\*]N[c](:n:[\*]):[c](:[\*]):[\*]
16. Unknown ECFP\_6 feature: -1242906247: [\*]:[c](:[\*])N[c](:[\*]):[\*]
17. Unknown ECFP\_6 feature: -177077903: [\*]N[c](:[cH]):[\*]:[cH]:[\*]
18. Unknown ECFP\_6 feature: -177264675: [\*]S(=[\*])(=[\*])[c](:[cH]):[\*]:[cH]:[\*]

19. Unknown ECFP\_6 feature: -2121766239: [\*];[c](:[\*])S(=O)(=O)N
20. Unknown ECFP\_6 feature: 2102150379: [\*]S(=[\*])(=O)[\*]
21. Unknown ECFP\_6 feature: -934226723: [\*]S(=[\*])(=[\*])N

## Feature Contribution

### Top features for positive contribution

| Fingerprint | Bit/Smiles | Feature Structure                                                                                                             | Score  |
|-------------|------------|-------------------------------------------------------------------------------------------------------------------------------|--------|
| ECFP_6      | -167460056 | <p>AND Enantiomer</p> 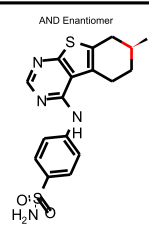 <p>[*]C([*])[*]</p> | 0.136  |
| FCFP_6      | 3          | <p>AND Enantiomer</p>  <p>[*]N[*]</p>      | 0.0924 |
| ECFP_6      | 1572579716 | <p>AND Enantiomer</p>  <p>[*]N</p>        | 0.0576 |

### Top Features for negative contribution

| Fingerprint | Bit/Smiles | Feature Structure | Score |
|-------------|------------|-------------------|-------|
|             |            |                   |       |

|        |            |                                                                                                                                                           |         |
|--------|------------|-----------------------------------------------------------------------------------------------------------------------------------------------------------|---------|
| FCFP_6 | 1          | <p>AND Enantiomer</p> 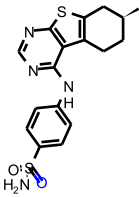 <p>[*]O[*]</p>                                  | -0.102  |
| FCFP_6 | -453677277 | <p>AND Enantiomer</p>  <p>[*]C[c]1:[cH]:[*]:[cH]<br/>]:[cH]:[cH]:1</p> | -0.0906 |
| FCFP_6 | 136597326  | <p>AND Enantiomer</p>  <p>[*]C([*])C</p>                               | -0.0815 |

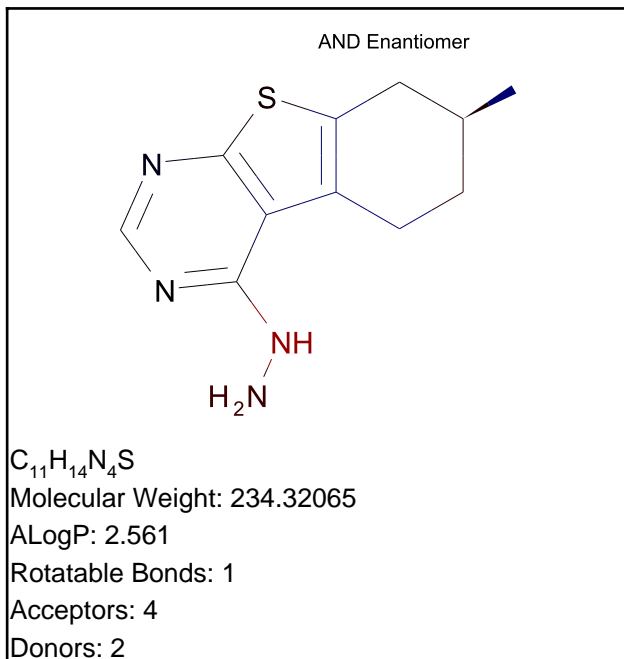

### Model Prediction

Prediction: 0.129

Unit: g/kg\_body\_weight

Mahalanobis Distance: 36.4

Mahalanobis Distance p-value: 4.74e-036

Mahalanobis Distance: The Mahalanobis distance (MD) is a generalization of the Euclidean distance that accounts for correlations among the X properties. It is calculated as the distance to the center of the training data. The larger the MD, the less trustworthy the prediction.

Mahalanobis Distance p-value: The p-value gives the fraction of training data with an MD greater than or equal to the one for the given sample, assuming normally distributed data. The smaller the p-value, the less trustworthy the prediction. For highly non-normal X properties (e.g., fingerprints), the MD p-value is wildly inaccurate.

### Structural Similar Compounds

| Name                        | PYRIMETHAMINE                                                                       | 4;4'-THIODIANILINE                                                                  | DAPSONE                                                                             |
|-----------------------------|-------------------------------------------------------------------------------------|-------------------------------------------------------------------------------------|-------------------------------------------------------------------------------------|
| Structure                   | 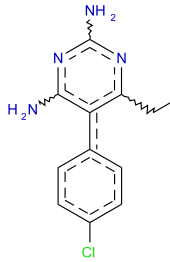 |  |  |
| Actual Endpoint (-log C)    | 3.99776                                                                             | 3.46                                                                                | 3.6168                                                                              |
| Predicted Endpoint (-log C) | 4.25218                                                                             | 3.46805                                                                             | 3.43657                                                                             |
| Distance                    | 0.465                                                                               | 0.532                                                                               | 0.559                                                                               |
| Reference                   | NTP 77 55                                                                           | NTP 47 VIII                                                                         | NTP 20 47                                                                           |

### Model Applicability

Unknown features are fingerprint features in the query molecule, but not found or appearing too infrequently in the training set.

1. OPS PC31 out of range. Value: 4.3094. Training min, max, SD, explained variance: -4.0208, 4.2529, 1.246, 0.0068.
2. Unknown FCFP\_2 feature: 1294344583: [\*]NN[c](:[\*]):[\*]
3. Unknown FCFP\_2 feature: 1070150408: [\*]NN
4. Unknown ECFP\_6 feature: 914325265: [\*]:s:[\*]
5. Unknown ECFP\_6 feature: 292958156: [\*]CC(C)C[\*]
6. Unknown ECFP\_6 feature: 53207596: [\*]C(\*)C[c](:[\*]):[\*]
7. Unknown ECFP\_6 feature: -1672647522: [\*]C[c]1:s:[\*]:[\*]:[c]:1[\*]
8. Unknown ECFP\_6 feature: -1660340418: [\*]C[c]1:[c]([\*]):[\*]:[\*]:[c]:1[\*]
9. Unknown ECFP\_6 feature: 51876938: [\*]CC[c](:[\*]):[\*]
10. Unknown ECFP\_6 feature: 85262808: [\*][c]1:[\*]:[\*]:[c](:[\*]):s:1
11. Unknown ECFP\_6 feature: -1597579789: [\*]:n:[c]1:s:[\*]:[\*]:[c]:1[\*]
12. Unknown ECFP\_6 feature: -1661653144: [\*][c](:[\*]):[c]1:[c]([\*]):[\*]:[\*]:[c]:1[\*]
13. Unknown ECFP\_6 feature: 865482986: [\*]C(\*)C
14. Unknown ECFP\_6 feature: -677309799: [\*]:[cH]:n:[c](:[\*]):[\*]
15. Unknown ECFP\_6 feature: -710237522: [\*]:n:[cH]:n:[\*]
16. Unknown ECFP\_6 feature: 1049768340: [\*]N[c](:n:[\*]):[c](:[\*]):[\*]
17. Unknown ECFP\_6 feature: -136863293: [\*]:[c](:[\*])NN
18. Unknown ECFP\_6 feature: -934039951: [\*]NN

## Feature Contribution

| Top features for positive contribution |            |                                                                                                                               |         |
|----------------------------------------|------------|-------------------------------------------------------------------------------------------------------------------------------|---------|
| Fingerprint                            | Bit/Smiles | Feature Structure                                                                                                             | Score   |
| ECFP_6                                 | 167460056  | <p>AND Enantiomer</p> 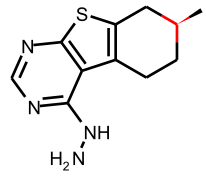 <p>[*]C([*])[*]</p> | 0.136   |
| FCFP_6                                 | 3          | <p>AND Enantiomer</p>  <p>[*]N[*]</p>      | 0.0924  |
| ECFP_6                                 | 1572579716 | <p>AND Enantiomer</p>  <p>[*]N</p>         | 0.0576  |
| Top Features for negative contribution |            |                                                                                                                               |         |
| Fingerprint                            | Bit/Smiles | Feature Structure                                                                                                             | Score   |
| FCFP_6                                 | 136597326  | <p>AND Enantiomer</p>  <p>[*]C([*])C</p> | -0.0815 |

|        |             |                                                                                                                                                           |         |
|--------|-------------|-----------------------------------------------------------------------------------------------------------------------------------------------------------|---------|
| FCFP_6 | 203677720   | <p>AND Enantiomer</p> 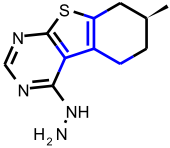 <p>[*]C[c]1:[c]([*]):[*]<br/>:[*]:[c]:1:[*]</p> | -0.0713 |
| ECFP_6 | -1331450522 | <p>AND Enantiomer</p>  <p>[*]CCC([*])[*]</p>                           | -0.0538 |



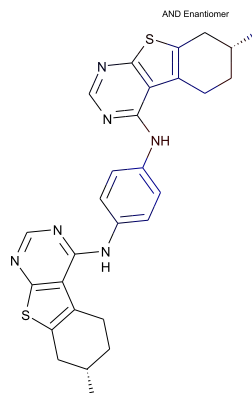
 $C_{28}H_{28}N_6S_2$ 

Molecular Weight: 512.69212

ALogP: 7.842

Rotatable Bonds: 4

Acceptors: 6

Donors: 2

### Model Prediction

Prediction: 0.0719

Unit: g/kg\_body\_weight

Mahalanobis Distance: 33.8

Mahalanobis Distance p-value: 1.77e-031

Mahalanobis Distance: The Mahalanobis distance (MD) is a generalization of the Euclidean distance that accounts for correlations among the X properties. It is calculated as the distance to the center of the training data. The larger the MD, the less trustworthy the prediction.

Mahalanobis Distance p-value: The p-value gives the fraction of training data with an MD greater than or equal to the one for the given sample, assuming normally distributed data. The smaller the p-value, the less trustworthy the prediction. For highly non-normal X properties (e.g., fingerprints), the MD p-value is wildly inaccurate.

### Structural Similar Compounds

| Name                        | C.I.PIGMENT RED 23 | DIARYLANILIDE YELLOW | C.I. ACID RED 14 |
|-----------------------------|--------------------|----------------------|------------------|
| Structure                   |                    |                      |                  |
| Actual Endpoint (-log C)    | 2.28997            | 2.70208              | 2.8654           |
| Predicted Endpoint (-log C) | 3.52921            | 3.76154              | 3.29295          |
| Distance                    | 0.862              | 0.898                | 0.923            |
| Reference                   | NTP 411 146        | NTP 30 C-4           | NTP REPORT # 220 |

### Model Applicability

Unknown features are fingerprint features in the query molecule, but not found or appearing too infrequently in the training set.

1. All properties and OPS components are within expected ranges.
2. Unknown ECFP\_6 feature: 914325265: [\*]:s:[\*]
3. Unknown ECFP\_6 feature: 292958156: [\*]CC(C)C[\*]
4. Unknown ECFP\_6 feature: 53207596: [\*]C(\*)C[c](:[\*]):[\*]
5. Unknown ECFP\_6 feature: -1672647522: [\*]C[c]1:s:[\*]:[\*]:[c]:1[\*]
6. Unknown ECFP\_6 feature: -1660340418: [\*]C[c]1:[c]([\*]):[\*]:[\*]:[c]:1:[\*]
7. Unknown ECFP\_6 feature: 51876938: [\*]CC[c](:[\*]):[\*]
8. Unknown ECFP\_6 feature: 85262808: [\*][c]1:[\*]:[\*]:[c](:[\*]):s:1
9. Unknown ECFP\_6 feature: -1597579789: [\*]:n:[c]1:s:[\*]:[\*]:[c]:1:[\*]
10. Unknown ECFP\_6 feature: -1661653144: [\*][c](:[\*]):[c]1:[c]([\*]):[\*]:[\*]:[c]:1:[\*]
11. Unknown ECFP\_6 feature: 865482986: [\*]C(\*)C
12. Unknown ECFP\_6 feature: -677309799: [\*]:[cH]:n:[c](:[\*]):[\*]
13. Unknown ECFP\_6 feature: -710237522: [\*]:n:[cH]:n:[\*]
14. Unknown ECFP\_6 feature: 1049768340: [\*]N[c](:n:[\*]):[c](:[\*]):[\*]
15. Unknown ECFP\_6 feature: -1242906247: [\*]:[c](:[\*])N[c](:[\*]):[\*]
16. Unknown ECFP\_6 feature: -177077903: [\*]N[c](:[cH]):[\*]:[cH]:[\*]

### Feature Contribution

Top features for positive contribution

| Fingerprint                                   | Bit/Smiles | Feature Structure                                                                                                             | Score   |
|-----------------------------------------------|------------|-------------------------------------------------------------------------------------------------------------------------------|---------|
| ECFP_6                                        | -167460056 | <p>AND Enantiomer</p> 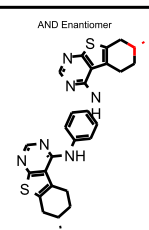 <p>[*]C([*])[*]</p> | 0.136   |
| FCFP_6                                        | 3          | <p>AND Enantiomer</p>  <p>[*]N[*]</p>      | 0.0924  |
| ECFP_6                                        | -992506539 | <p>AND Enantiomer</p>  <p>[*]C[*]</p>      | 0.0554  |
| <b>Top Features for negative contribution</b> |            |                                                                                                                               |         |
| Fingerprint                                   | Bit/Smiles | Feature Structure                                                                                                             | Score   |
| FCFP_6                                        | 136597326  | <p>AND Enantiomer</p>  <p>[*]C([*])C</p> | -0.0815 |
|                                               |            |                                                                                                                               |         |

|        |            |                                                                                                                                                              |         |
|--------|------------|--------------------------------------------------------------------------------------------------------------------------------------------------------------|---------|
| FCFP_6 | 203677720  | <p>AND Enantiomer</p> 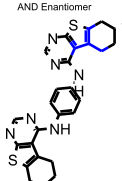 <p>[*]C[c]1:[c]([*]):[*]<br/>:[*]:[c]:1:[*]</p>    | -0.0713 |
| FCFP_6 | -773983804 | <p>AND Enantiomer</p>  <p>[*]N[c]1:[cH]:[*]:[c]<br/>([*]):[cH]:[cH]:1</p> | -0.0589 |

# Erlotinib

# TOPKAT\_Chronic\_LOAEL

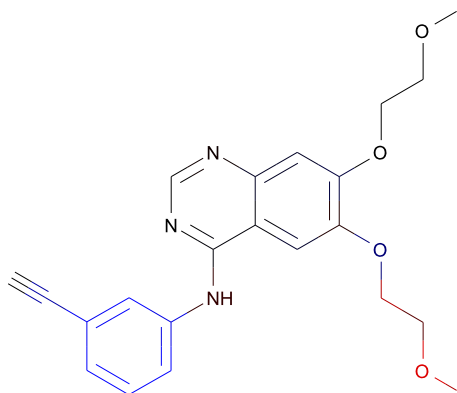

$C_{22}H_{23}N_3O_4$   
Molecular Weight: 393.43572  
ALogP: 4.309  
Rotatable Bonds: 10  
Acceptors: 7  
Donors: 1

## Model Prediction

Prediction: 0.0359  
Unit: g/kg\_body\_weight  
Mahalanobis Distance: 34.8  
Mahalanobis Distance p-value: 2.91e-033

Mahalanobis Distance: The Mahalanobis distance (MD) is a generalization of the Euclidean distance that accounts for correlations among the X properties. It is calculated as the distance to the center of the training data. The larger the MD, the less trustworthy the prediction.

Mahalanobis Distance p-value: The p-value gives the fraction of training data with an MD greater than or equal to the one for the given sample, assuming normally distributed data. The smaller the p-value, the less trustworthy the prediction. For highly non-normal X properties (e.g., fingerprints), the MD p-value is wildly inaccurate.

## Structural Similar Compounds

| Name                        | ASSURE                                                                              | DILTIAZEM                                                                           | RHODAMINE 6G                                                                        |
|-----------------------------|-------------------------------------------------------------------------------------|-------------------------------------------------------------------------------------|-------------------------------------------------------------------------------------|
| Structure                   | 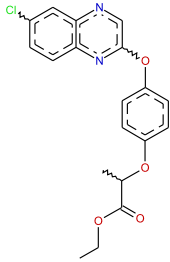 |  |  |
| Actual Endpoint (-log C)    | 5.00328                                                                             | 4.21961                                                                             | 4.54906                                                                             |
| Predicted Endpoint (-log C) | 4.27671                                                                             | 4.005                                                                               | 4.6787                                                                              |
| Distance                    | 0.611                                                                               | 0.676                                                                               | 0.689                                                                               |
| Reference                   | EPA COVER SHEET 0335;891001;(1)                                                     | NDA-18602                                                                           | NTP 364 39                                                                          |

## Model Applicability

Unknown features are fingerprint features in the query molecule, but not found or appearing too infrequently in the training set.

1. All properties and OPS components are within expected ranges.
2. Unknown FCFP\_2 feature: 902193919: [\*]:[c](:[\*])C#C
3. Unknown FCFP\_2 feature: 131784192: [\*]C#C
4. Unknown ECFP\_6 feature: -1114776580: [\*]C#[\*]
5. Unknown ECFP\_6 feature: -1939823063: [\*]#C
6. Unknown ECFP\_6 feature: 1410041175: [\*]:[cH]:[c](:n:[\*]):[c](:[\*]):[\*]
7. Unknown ECFP\_6 feature: 1333660716: [\*][c](:[\*]):[c](:[cH]:[\*]):[c](:[\*]):[\*]
8. Unknown ECFP\_6 feature: -677309799: [\*]:[cH]:n:[c](:[\*]):[\*]
9. Unknown ECFP\_6 feature: -710237522: [\*]:n:[cH]:n:[\*]
10. Unknown ECFP\_6 feature: 1049768340: [\*]N[c](:n:[\*]):[c](:[\*]):[\*]
11. Unknown ECFP\_6 feature: -1255706725: [\*]CO[c](:[\*]):[\*]
12. Unknown ECFP\_6 feature: -1790412586: [\*]CCO[\*]
13. Unknown ECFP\_6 feature: -1242906247: [\*]:[c](:[\*])N[c](:[\*]):[\*]
14. Unknown ECFP\_6 feature: -177077903: [\*]N[c](:[cH]:[\*]):[cH]:[\*]
15. Unknown ECFP\_6 feature: 1997021792: [\*]:[cH]:[cH]:[cH]:[\*]
16. Unknown ECFP\_6 feature: -182178874: [\*]#C[c](:[cH]:[\*]):[cH]:[\*]
17. Unknown ECFP\_6 feature: 1139738044: [\*]:[c](:[\*])C#C
18. Unknown ECFP\_6 feature: -1545539812: [\*]C#C
19. Unknown ECFP\_6 feature: -1253653003: [\*]COC

## Feature Contribution

| Top features for positive contribution |            |                                                                                                                                |        |
|----------------------------------------|------------|--------------------------------------------------------------------------------------------------------------------------------|--------|
| Fingerprint                            | Bit/Smiles | Feature Structure                                                                                                              | Score  |
| FCFP_6                                 | 1143715940 | 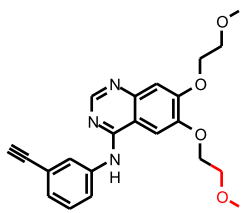<br>[*]COC                                  | 0.13   |
| ECFP_6                                 | 1559650422 | <br>[*]C[*]                                 | 0.129  |
| FCFP_6                                 | 3          | <br>[*]N[*]                                 | 0.0924 |
| Top Features for negative contribution |            |                                                                                                                                |        |
| Fingerprint                            | Bit/Smiles | Feature Structure                                                                                                              | Score  |
| FCFP_6                                 | 991735244  | <br>[*][c]1:[*]:[cH]:[cH]<br>:[cH]:[cH]:1 | -0.134 |

|        |            |                                                                                                                                                                   |         |
|--------|------------|-------------------------------------------------------------------------------------------------------------------------------------------------------------------|---------|
| FCFP_6 | 1          | 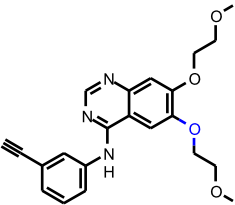 <p data-bbox="1461 326 1535 354">[*]O[*]</p>                                  | -0.102  |
| FCFP_6 | -453677277 |  <p data-bbox="1383 558 1556 607">[*]C[c]1:[cH]:[*]:[cH]<br/>]:[cH]:[cH]:1</p> | -0.0906 |

5a

TOPKAT\_Rat\_Maximum\_Tolerated\_Dose\_Feed

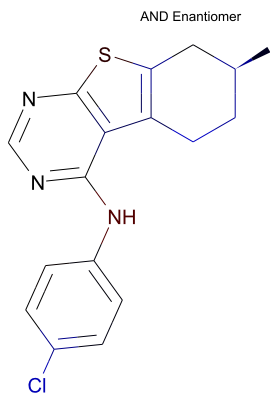C<sub>17</sub>H<sub>16</sub>ClN<sub>3</sub>S

Molecular Weight: 329.84704

ALogP: 5.5

Rotatable Bonds: 2

Acceptors: 3

Donors: 1

**Model Prediction**

Prediction: 0.13

Unit: g/kg\_body\_weight

Mahalanobis Distance: 11.4

Mahalanobis Distance p-value: 1.36e-007

Mahalanobis Distance: The Mahalanobis distance (MD) is a generalization of the Euclidean distance that accounts for correlations among the X properties. It is calculated as the distance to the center of the training data. The larger the MD, the less trustworthy the prediction.

Mahalanobis Distance p-value: The p-value gives the fraction of training data with an MD greater than or equal to the one for the given sample, assuming normally distributed data. The smaller the p-value, the less trustworthy the prediction. For highly non-normal X properties (e.g., fingerprints), the MD p-value is wildly inaccurate.

**Structural Similar Compounds**

| Name                        | ANILAZINE      | D&C YELLOW NO. 11 | 1-AMINO-2,4-DIBROMOANTHRAQUINO NE |
|-----------------------------|----------------|-------------------|-----------------------------------|
| Structure                   |                |                   |                                   |
| Actual Endpoint (-log C)    | 3.78694        | 4.03869           | 2.82966                           |
| Predicted Endpoint (-log C) | 3.42114        | 3.54593           | 3.92444                           |
| Distance                    | 0.563          | 0.623             | 0.632                             |
| Reference                   | NCI/NTP TR-104 | NCI/NTP TR-463    | NCI/NTP TR-383                    |

**Model Applicability**

Unknown features are fingerprint features in the query molecule, but not found or appearing too infrequently in the training set.

1. All properties and OPS components are within expected ranges.
2. Unknown FCFP\_2 feature: -124685461: [\*]:n:c:n:[\*]

**Feature Contribution****Top features for positive contribution**

| Fingerprint | Bit/Smiles | Feature Structure | Score  |
|-------------|------------|-------------------|--------|
| FCFP_2      | 3          | <p>[*]N[*]</p>    | 0.0737 |

|                                               |                   |                                                                                                                                                             |              |
|-----------------------------------------------|-------------------|-------------------------------------------------------------------------------------------------------------------------------------------------------------|--------------|
| FCFP_2                                        | 17                | <p>AND Enantiomer</p> 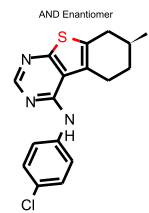 <p>[*]:s:[*]</p>                                   | 0.0441       |
| FCFP_2                                        | 590925877         | <p>AND Enantiomer</p>  <p>[*]N[c](:[cH]:[*]):[c<br/>H]:[*]</p>           | 0.00762      |
| <b>Top Features for negative contribution</b> |                   |                                                                                                                                                             |              |
| <b>Fingerprint</b>                            | <b>Bit/Smiles</b> | <b>Feature Structure</b>                                                                                                                                    | <b>Score</b> |
| FCFP_2                                        | 71476542          | <p>AND Enantiomer</p>  <p>[*]:[c](:[*])Cl</p>                            | -0.134       |
| FCFP_2                                        | -1272798659       | <p>AND Enantiomer</p>  <p>[*]CCC([*])[*]</p>                           | -0.111       |
| FCFP_2                                        | 203677720         | <p>AND Enantiomer</p>  <p>[*]C[c]1:[c]([*]):[*]<br/>:[*]:[c]:1:[*]</p> | -0.0829      |





5b

TOPKAT\_Rat\_Maximum\_Tolerated\_Dose\_Feed

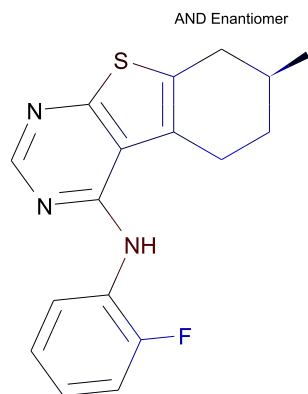

$C_{17}H_{16}FN_3S$   
 Molecular Weight: 313.39244  
 ALogP: 5.041  
 Rotatable Bonds: 2  
 Acceptors: 3  
 Donors: 1

### Model Prediction

Prediction: 0.138  
 Unit: g/kg\_body\_weight  
 Mahalanobis Distance: 11.6  
 Mahalanobis Distance p-value: 6.73e-008

Mahalanobis Distance: The Mahalanobis distance (MD) is a generalization of the Euclidean distance that accounts for correlations among the X properties. It is calculated as the distance to the center of the training data. The larger the MD, the less trustworthy the prediction.  
 Mahalanobis Distance p-value: The p-value gives the fraction of training data with an MD greater than or equal to the one for the given sample, assuming normally distributed data. The smaller the p-value, the less trustworthy the prediction. For highly non-normal X properties (e.g., fingerprints), the MD p-value is wildly inaccurate.

### Structural Similar Compounds

| Name                        | ANILAZINE      | D&C YELLOW NO. 11 | C.I. SOLVENT YELLOW 14 |
|-----------------------------|----------------|-------------------|------------------------|
| Structure                   |                |                   |                        |
| Actual Endpoint (-log C)    | 3.78694        | 4.03869           | 4.04277                |
| Predicted Endpoint (-log C) | 3.42114        | 3.54593           | 2.8989                 |
| Distance                    | 0.544          | 0.589             | 0.612                  |
| Reference                   | NCI/NTP TR-104 | NCI/NTP TR-463    | NCI/NTP TR-226         |

### Model Applicability

Unknown features are fingerprint features in the query molecule, but not found or appearing too infrequently in the training set.

1. All properties and OPS components are within expected ranges.
2. Unknown FCFP\_2 feature: -124685461: [\*]:n:c:n:[\*]

### Feature Contribution

#### Top features for positive contribution

| Fingerprint | Bit/Smiles | Feature Structure                    | Score  |
|-------------|------------|--------------------------------------|--------|
| FCFP_2      | 3          | <p>AND Enantiomer</p> <p>[*]N[*]</p> | 0.0737 |

|                                               |                   |                                                                                                                                                        |              |
|-----------------------------------------------|-------------------|--------------------------------------------------------------------------------------------------------------------------------------------------------|--------------|
| FCFP_2                                        | 17                | <p>AND Enantiomer</p> 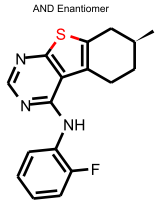 <p>[*]:s:[*]</p>                             | 0.0441       |
| FCFP_2                                        | 590925877         | <p>AND Enantiomer</p>  <p>[*]N[c](:[cH]:[*]):[cH]:[*]</p>           | 0.00762      |
| <b>Top Features for negative contribution</b> |                   |                                                                                                                                                        |              |
| <b>Fingerprint</b>                            | <b>Bit/Smiles</b> | <b>Feature Structure</b>                                                                                                                               | <b>Score</b> |
| FCFP_2                                        | 71476542          | <p>AND Enantiomer</p>  <p>[*]:[c](:[*])Cl</p>                       | -0.134       |
| FCFP_2                                        | -1272798659       | <p>AND Enantiomer</p>  <p>[*]CCC([*])[*]</p>                      | -0.111       |
| FCFP_2                                        | 203677720         | <p>AND Enantiomer</p>  <p>[*]C[c]1:[c]([*]):[*]:[*]:[c]:1:[*]</p> | -0.0829      |



5c

TOPKAT\_Rat\_Maximum\_Tolerated\_Dose\_Feed

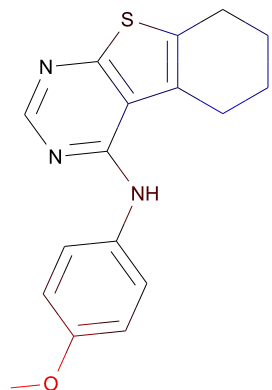C<sub>17</sub>H<sub>17</sub>N<sub>3</sub>OS

Molecular Weight: 311.40138

ALogP: 4.568

Rotatable Bonds: 3

Acceptors: 4

Donors: 1

### Model Prediction

Prediction: 0.0607

Unit: g/kg\_body\_weight

Mahalanobis Distance: 10.2

Mahalanobis Distance p-value: 2.32e-005

Mahalanobis Distance: The Mahalanobis distance (MD) is a generalization of the Euclidean distance that accounts for correlations among the X properties. It is calculated as the distance to the center of the training data. The larger the MD, the less trustworthy the prediction.

Mahalanobis Distance p-value: The p-value gives the fraction of training data with an MD greater than or equal to the one for the given sample, assuming normally distributed data. The smaller the p-value, the less trustworthy the prediction. For highly non-normal X properties (e.g., fingerprints), the MD p-value is wildly inaccurate.

### Structural Similar Compounds

| Name                        | C.I.PIGMENT RED 3 | PHENOLPHTHALEIN | D&C YELLOW NO. 11 |
|-----------------------------|-------------------|-----------------|-------------------|
| Structure                   |                   |                 |                   |
| Actual Endpoint (-log C)    | 2.65635           | 2.20184         | 4.03869           |
| Predicted Endpoint (-log C) | 2.97957           | 2.8857          | 3.54593           |
| Distance                    | 0.524             | 0.579           | 0.584             |
| Reference                   | NCI/NTP TR-407    | NCI/NTP TR-465  | NCI/NTP TR-463    |

### Model Applicability

Unknown features are fingerprint features in the query molecule, but not found or appearing too infrequently in the training set.

- OPS PC9 out of range. Value: 3.507. Training min, max, SD, explained variance: -2.8548, 3.3954, 1.263, 0.0360.
- Unknown FCFP\_2 feature: -124685461: [\*]:n:c:n:[\*]

### Feature Contribution

#### Top features for positive contribution

| Fingerprint | Bit/Smiles | Feature Structure | Score |
|-------------|------------|-------------------|-------|
| FCFP_2      | 136627117  | <br>[*]OC         | 0.173 |

|                                               |                   |                                                                                                                                 |              |
|-----------------------------------------------|-------------------|---------------------------------------------------------------------------------------------------------------------------------|--------------|
| FCFP_2                                        | 1036089772        | 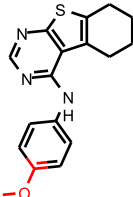<br>[*]:[c](:[*])OC                          | 0.0749       |
| FCFP_2                                        | 3                 | <br>[*]N[*]                                  | 0.0737       |
| <b>Top Features for negative contribution</b> |                   |                                                                                                                                 |              |
| <b>Fingerprint</b>                            | <b>Bit/Smiles</b> | <b>Feature Structure</b>                                                                                                        | <b>Score</b> |
| FCFP_2                                        | -1272798659       | <br>[*]CCC([*])[*]                           | -0.111       |
| FCFP_2                                        | 203677720         | <br>[*]C[c]1:[c]([*]):[*]<br>:[*]:[c]:1[*] | -0.0829      |
| FCFP_2                                        | 1                 | <br>[*]O[*]                                | -0.0796      |







|                                               |                   |                                                                                                                                                             |              |
|-----------------------------------------------|-------------------|-------------------------------------------------------------------------------------------------------------------------------------------------------------|--------------|
| FCFP_2                                        | 17                | <p>AND Enantiomer</p> 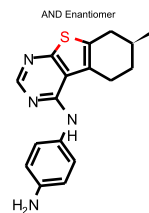 <p>[*]:s:[*]</p>                                   | 0.0441       |
| FCFP_2                                        | 590925877         | <p>AND Enantiomer</p>  <p>[*]N[c](:[cH]:[*]):[c<br/>H]:[*]</p>           | 0.00762      |
| <b>Top Features for negative contribution</b> |                   |                                                                                                                                                             |              |
| <b>Fingerprint</b>                            | <b>Bit/Smiles</b> | <b>Feature Structure</b>                                                                                                                                    | <b>Score</b> |
| FCFP_2                                        | -1272798659       | <p>AND Enantiomer</p>  <p>[*]CCC([*])[*]</p>                             | -0.111       |
| FCFP_2                                        | 203677720         | <p>AND Enantiomer</p>  <p>[*]C[c]1:[c]([*]):[*]<br/>:[*]:[c]:1:[*]</p> | -0.0829      |
| FCFP_2                                        | 16                | <p>AND Enantiomer</p>  <p>[*][c](:[*]):[*]</p>                         | -0.0512      |



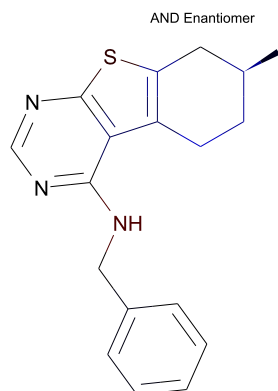

$C_{18}H_{19}N_3S$

Molecular Weight: 309.42856

ALogP: 4.678

Rotatable Bonds: 3

Acceptors: 3

Donors: 1

### Model Prediction

Prediction: 0.1

Unit: g/kg\_body\_weight

Mahalanobis Distance: 10.6

Mahalanobis Distance p-value: 3.79e-006

Mahalanobis Distance: The Mahalanobis distance (MD) is a generalization of the Euclidean distance that accounts for correlations among the X properties. It is calculated as the distance to the center of the training data. The larger the MD, the less trustworthy the prediction.

Mahalanobis Distance p-value: The p-value gives the fraction of training data with an MD greater than or equal to the one for the given sample, assuming normally distributed data. The smaller the p-value, the less trustworthy the prediction. For highly non-normal X properties (e.g., fingerprints), the MD p-value is wildly inaccurate.

### Structural Similar Compounds

| Name                        | D&C YELLOW NO. 11 | C.I. SOLVENT YELLOW 14 | PHENOLPHTHALEIN |
|-----------------------------|-------------------|------------------------|-----------------|
| Structure                   |                   |                        |                 |
| Actual Endpoint (-log C)    | 4.03869           | 4.04277                | 2.20184         |
| Predicted Endpoint (-log C) | 3.54593           | 2.8989                 | 2.8857          |
| Distance                    | 0.569             | 0.610                  | 0.615           |
| Reference                   | NCI/NTP TR-463    | NCI/NTP TR-226         | NCI/NTP TR-465  |

### Model Applicability

Unknown features are fingerprint features in the query molecule, but not found or appearing too infrequently in the training set.

- OPS PC9 out of range. Value: 3.5628. Training min, max, SD, explained variance: -2.8548, 3.3954, 1.263, 0.0360.
- Unknown FCFP\_2 feature: -124685461: [\*]:n:c:n:[\*]

### Feature Contribution

#### Top features for positive contribution

| Fingerprint | Bit/Smiles | Feature Structure | Score  |
|-------------|------------|-------------------|--------|
| FCFP_2      | 3          | <br>[*]N[*]       | 0.0737 |

|                                               |                   |                                                                                                                                                            |              |
|-----------------------------------------------|-------------------|------------------------------------------------------------------------------------------------------------------------------------------------------------|--------------|
| FCFP_2                                        | 17                | <p>AND Enantiomer</p> 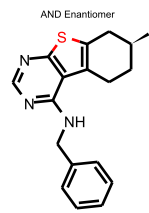 <p>[*]:s:[*]</p>                                  | 0.0441       |
| FCFP_2                                        | 1294255210        | <p>AND Enantiomer</p>  <p>[*]CN[c](:[*]):[*]</p>                        | 0.00319      |
| <b>Top Features for negative contribution</b> |                   |                                                                                                                                                            |              |
| <b>Fingerprint</b>                            | <b>Bit/Smiles</b> | <b>Feature Structure</b>                                                                                                                                   | <b>Score</b> |
| FCFP_2                                        | -1272798659       | <p>AND Enantiomer</p>  <p>[*]CCC([*])[*]</p>                            | -0.111       |
| FCFP_2                                        | 203677720         | <p>AND Enantiomer</p>  <p>[*]C[c]1:[c]([*]):[*]<br/>:[*]:[c]:1[*]</p> | -0.0829      |
| FCFP_2                                        | 16                | <p>AND Enantiomer</p>  <p>[*][c](:[*]):[*]</p>                        | -0.0512      |



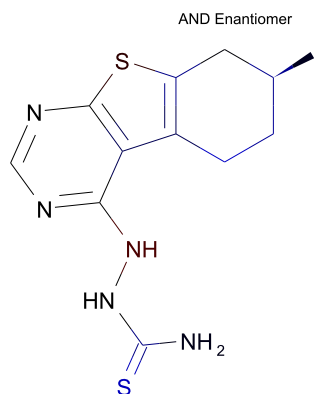

$C_{12}H_{15}N_5S_2$

Molecular Weight: 293.411

ALogP: 3.209

Rotatable Bonds: 3

Acceptors: 4

Donors: 3

### Model Prediction

Prediction: 0.222

Unit: g/kg\_body\_weight

Mahalanobis Distance: 10.6

Mahalanobis Distance p-value: 3.68e-006

Mahalanobis Distance: The Mahalanobis distance (MD) is a generalization of the Euclidean distance that accounts for correlations among the X properties. It is calculated as the distance to the center of the training data. The larger the MD, the less trustworthy the prediction.

Mahalanobis Distance p-value: The p-value gives the fraction of training data with an MD greater than or equal to the one for the given sample, assuming normally distributed data. The smaller the p-value, the less trustworthy the prediction. For highly non-normal X properties (e.g., fingerprints), the MD p-value is wildly inaccurate.

### Structural Similar Compounds

| Name                        | FUROSEMIDE     | ACETOHEXAMIDE  | DAPSONE       |
|-----------------------------|----------------|----------------|---------------|
| Structure                   |                |                |               |
| Actual Endpoint (-log C)    | 4.04236        | 2.55683        | 3.66258       |
| Predicted Endpoint (-log C) | 2.8614         | 3.62413        | 3.26993       |
| Distance                    | 0.571          | 0.696          | 0.700         |
| Reference                   | NCI/NTP TR-356 | NCI/NTP TR-050 | NCI/NTP TR-20 |

### Model Applicability

Unknown features are fingerprint features in the query molecule, but not found or appearing too infrequently in the training set.

1. OPS PC10 out of range. Value: 3.9942. Training min, max, SD, explained variance: -4.0578, 3.2378, 1.25, 0.0353.
2. Unknown FCFP\_2 feature: -124685461: [\*]:n:c:n:[\*]
3. Unknown FCFP\_2 feature: -885461129: [\*]NNC(=[\*])[\*]

### Feature Contribution

#### Top features for positive contribution

| Fingerprint | Bit/Smiles | Feature Structure                    | Score  |
|-------------|------------|--------------------------------------|--------|
| FCFP_2      | 3          | <p>AND Enantiomer</p> <p>[*]N[*]</p> | 0.0737 |

|                                               |                   |                                                                                                                                                             |              |
|-----------------------------------------------|-------------------|-------------------------------------------------------------------------------------------------------------------------------------------------------------|--------------|
| FCFP_2                                        | 17                | <p>AND Enantiomer</p> 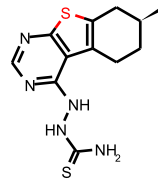 <p>[*]:s:[*]</p>                                  | 0.0441       |
| <b>Top Features for negative contribution</b> |                   |                                                                                                                                                             |              |
| <b>Fingerprint</b>                            | <b>Bit/Smiles</b> | <b>Feature Structure</b>                                                                                                                                    | <b>Score</b> |
| FCFP_2                                        | -1272798659       | <p>AND Enantiomer</p>  <p>[*]CCC([*])[*]</p>                             | -0.111       |
| FCFP_2                                        | 1872154524        | <p>AND Enantiomer</p>  <p>[*]C(=S)[*]</p>                                | -0.105       |
| FCFP_2                                        | 203677720         | <p>AND Enantiomer</p>  <p>[*]C[c]1:[c]([*]):[*]<br/>:[*]:[c]:1:[*]</p> | -0.0829      |

9a

TOPKAT\_Rat\_Maximum\_Tolerated\_Dose\_Feed

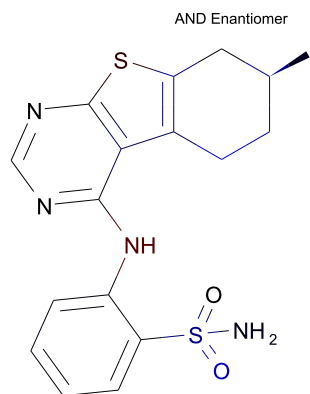C<sub>17</sub>H<sub>18</sub>N<sub>4</sub>O<sub>2</sub>S<sub>2</sub>

Molecular Weight: 374.48042

ALogP: 3.541

Rotatable Bonds: 3

Acceptors: 5

Donors: 2

**Model Prediction**

Prediction: 0.109

Unit: g/kg\_body\_weight

Mahalanobis Distance: 11.1

Mahalanobis Distance p-value: 5.29e-007

Mahalanobis Distance: The Mahalanobis distance (MD) is a generalization of the Euclidean distance that accounts for correlations among the X properties. It is calculated as the distance to the center of the training data. The larger the MD, the less trustworthy the prediction.

Mahalanobis Distance p-value: The p-value gives the fraction of training data with an MD greater than or equal to the one for the given sample, assuming normally distributed data. The smaller the p-value, the less trustworthy the prediction. For highly non-normal X properties (e.g., fingerprints), the MD p-value is wildly inaccurate.

**Structural Similar Compounds**

| Name                        | FUROSEMIDE     | SALICYLAZOSULFAPYRIDINE | DAPSONE       |
|-----------------------------|----------------|-------------------------|---------------|
| Structure                   |                |                         |               |
| Actual Endpoint (-log C)    | 4.04236        | 3.375                   | 3.66258       |
| Predicted Endpoint (-log C) | 2.8614         | 2.80292                 | 3.26993       |
| Distance                    | 0.637          | 0.660                   | 0.748         |
| Reference                   | NCI/NTP TR-356 | NCI/NTP TR-457          | NCI/NTP TR-20 |

**Model Applicability**

Unknown features are fingerprint features in the query molecule, but not found or appearing too infrequently in the training set.

- OPS PC10 out of range. Value: 3.8932. Training min, max, SD, explained variance: -4.0578, 3.2378, 1.25, 0.0353.
- Unknown FCFP\_2 feature: -124685461: [\*]:n:c:n:[\*]

**Feature Contribution****Top features for positive contribution**

| Fingerprint | Bit/Smiles | Feature Structure                    | Score  |
|-------------|------------|--------------------------------------|--------|
| FCFP_2      | 3          | <p>AND Enantiomer</p> <p>[*]N[*]</p> | 0.0737 |



|                                               |                   |                                                                                                                                                             |              |
|-----------------------------------------------|-------------------|-------------------------------------------------------------------------------------------------------------------------------------------------------------|--------------|
| FCFP_2                                        | 17                | <p>AND Enantiomer</p> 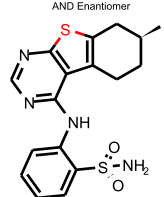 <p>[*]:s:[*]</p>                                  | 0.0441       |
| FCFP_2                                        | 590925877         | <p>AND Enantiomer</p>  <p>[*]N[c](:[cH]:[*]):[c<br/>H]:[*]</p>           | 0.00762      |
| <b>Top Features for negative contribution</b> |                   |                                                                                                                                                             |              |
| <b>Fingerprint</b>                            | <b>Bit/Smiles</b> | <b>Feature Structure</b>                                                                                                                                    | <b>Score</b> |
| FCFP_2                                        | -1272798659       | <p>AND Enantiomer</p>  <p>[*]CCC([*])[*]</p>                             | -0.111       |
| FCFP_2                                        | 1872154524        | <p>AND Enantiomer</p>  <p>[*]C(=S)[*]</p>                              | -0.105       |
| FCFP_2                                        | 203677720         | <p>AND Enantiomer</p>  <p>[*]C[c]1:[c]([*]):[*]<br/>:[*]:[c]:1:[*]</p> | -0.0829      |



9b

TOPKAT\_Rat\_Maximum\_Tolerated\_Dose\_Feed

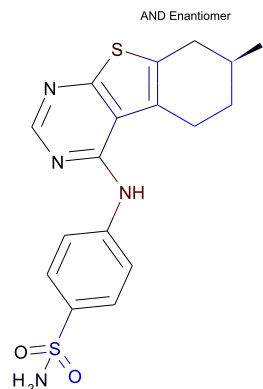C<sub>17</sub>H<sub>18</sub>N<sub>4</sub>O<sub>2</sub>S<sub>2</sub>

Molecular Weight: 374.48042

ALogP: 3.541

Rotatable Bonds: 3

Acceptors: 5

Donors: 2

**Model Prediction**

Prediction: 0.109

Unit: g/kg\_body\_weight

Mahalanobis Distance: 11.1

Mahalanobis Distance p-value: 5.29e-007

Mahalanobis Distance: The Mahalanobis distance (MD) is a generalization of the Euclidean distance that accounts for correlations among the X properties. It is calculated as the distance to the center of the training data. The larger the MD, the less trustworthy the prediction.

Mahalanobis Distance p-value: The p-value gives the fraction of training data with an MD greater than or equal to the one for the given sample, assuming normally distributed data. The smaller the p-value, the less trustworthy the prediction. For highly non-normal X properties (e.g., fingerprints), the MD p-value is wildly inaccurate.

**Structural Similar Compounds**

| Name                        | FUROSEMIDE     | SALICYLAZOSULFAPYRIDINE | DAPSONE       |
|-----------------------------|----------------|-------------------------|---------------|
| Structure                   |                |                         |               |
| Actual Endpoint (-log C)    | 4.04236        | 3.375                   | 3.66258       |
| Predicted Endpoint (-log C) | 2.8614         | 2.80292                 | 3.26993       |
| Distance                    | 0.637          | 0.660                   | 0.748         |
| Reference                   | NCI/NTP TR-356 | NCI/NTP TR-457          | NCI/NTP TR-20 |

**Model Applicability**

Unknown features are fingerprint features in the query molecule, but not found or appearing too infrequently in the training set.

- OPS PC10 out of range. Value: 3.8932. Training min, max, SD, explained variance: -4.0578, 3.2378, 1.25, 0.0353.
- Unknown FCFP\_2 feature: -124685461: [\*]:n:c:n:[\*]

**Feature Contribution****Top features for positive contribution**

| Fingerprint | Bit/Smiles | Feature Structure | Score  |
|-------------|------------|-------------------|--------|
| FCFP_2      | 3          |                   | 0.0737 |

|                                               |                   |                                                                                                                                                             |              |
|-----------------------------------------------|-------------------|-------------------------------------------------------------------------------------------------------------------------------------------------------------|--------------|
| FCFP_2                                        | 17                | <p>AND Enantiomer</p> 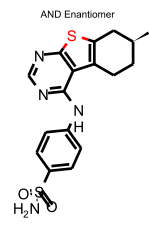 <p>[*]:s:[*]</p>                                   | 0.0441       |
| FCFP_2                                        | 590925877         | <p>AND Enantiomer</p>  <p>[*]N[c](:[cH]:[*]):[c<br/>H]:[*]</p>           | 0.00762      |
| <b>Top Features for negative contribution</b> |                   |                                                                                                                                                             |              |
| <b>Fingerprint</b>                            | <b>Bit/Smiles</b> | <b>Feature Structure</b>                                                                                                                                    | <b>Score</b> |
| FCFP_2                                        | -1272798659       | <p>AND Enantiomer</p>  <p>[*]CCC([*])[*]</p>                             | -0.111       |
| FCFP_2                                        | 1872154524        | <p>AND Enantiomer</p>  <p>[*]C(=S)[*]</p>                              | -0.105       |
| FCFP_2                                        | 203677720         | <p>AND Enantiomer</p>  <p>[*]C[c]1:[c]([*]):[*]<br/>:[*]:[c]:1:[*]</p> | -0.0829      |



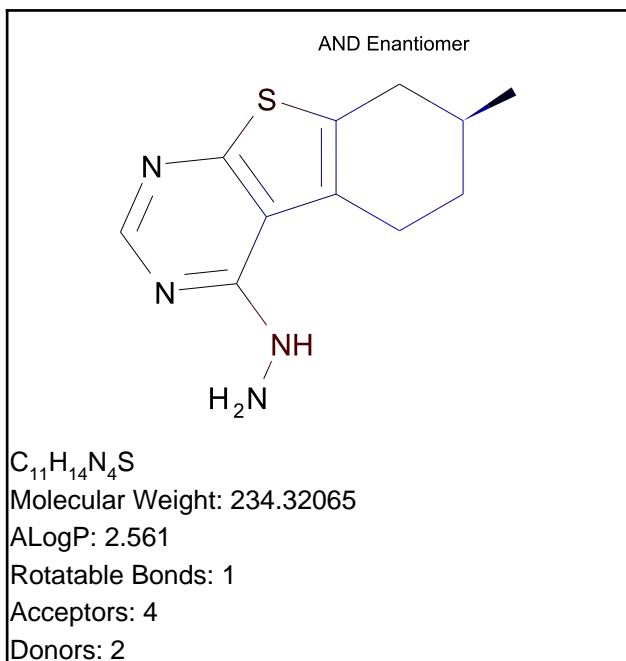

### Model Prediction

Prediction: 0.133

Unit: g/kg\_body\_weight

Mahalanobis Distance: 10.7

Mahalanobis Distance p-value: 2.76e-006

Mahalanobis Distance: The Mahalanobis distance (MD) is a generalization of the Euclidean distance that accounts for correlations among the X properties. It is calculated as the distance to the center of the training data. The larger the MD, the less trustworthy the prediction.

Mahalanobis Distance p-value: The p-value gives the fraction of training data with an MD greater than or equal to the one for the given sample, assuming normally distributed data. The smaller the p-value, the less trustworthy the prediction. For highly non-normal X properties (e.g., fingerprints), the MD p-value is wildly inaccurate.

### Structural Similar Compounds

| Name                        | DAPSONE                                                                             | 4,4'-THIODIANILINE                                                                  | BENZIDINE,3,3'-DIMETHOXY-                                                           |
|-----------------------------|-------------------------------------------------------------------------------------|-------------------------------------------------------------------------------------|-------------------------------------------------------------------------------------|
| Structure                   | 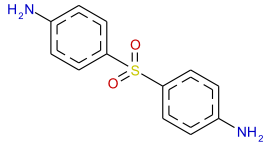 |  |  |
| Actual Endpoint (-log C)    | 3.66258                                                                             | 3.20473                                                                             | 4.06569                                                                             |
| Predicted Endpoint (-log C) | 3.26993                                                                             | 3.3362                                                                              | 3.57405                                                                             |
| Distance                    | 0.560                                                                               | 0.578                                                                               | 0.611                                                                               |
| Reference                   | NCI/NTP TR-20                                                                       | NCI/NTP TR-47                                                                       | NCI/NTP Report 10, Nov. 1987                                                        |

### Model Applicability

Unknown features are fingerprint features in the query molecule, but not found or appearing too infrequently in the training set.

1. All properties and OPS components are within expected ranges.
2. Unknown FCFP\_2 feature: -124685461: [\*]:n:c:n:[\*]
3. Unknown FCFP\_2 feature: 1070150408: [\*]NN

### Feature Contribution

#### Top features for positive contribution

| Fingerprint | Bit/Smiles | Feature Structure                                                                                                                                                                  | Score  |
|-------------|------------|------------------------------------------------------------------------------------------------------------------------------------------------------------------------------------|--------|
| FCFP_2      | 3          | <p style="text-align: center;">AND Enantiomer</p> 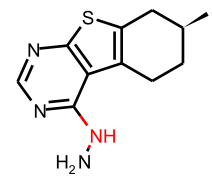 <p style="text-align: center;">[*]N[*]</p> | 0.0737 |

|                                               |                   |                                                                                                                                                           |              |
|-----------------------------------------------|-------------------|-----------------------------------------------------------------------------------------------------------------------------------------------------------|--------------|
| FCFP_2                                        | 17                | <p>AND Enantiomer</p> 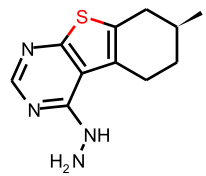 <p>[*]:s:[*]</p>                                | 0.0441       |
| <b>Top Features for negative contribution</b> |                   |                                                                                                                                                           |              |
| <b>Fingerprint</b>                            | <b>Bit/Smiles</b> | <b>Feature Structure</b>                                                                                                                                  | <b>Score</b> |
| FCFP_2                                        | -1272798659       | <p>AND Enantiomer</p>  <p>[*]CCC([*])[*]</p>                           | -0.111       |
| FCFP_2                                        | 203677720         | <p>AND Enantiomer</p>  <p>[*]C[c]1:[c]([*]):[*]<br/>:[*]:[c]:1:[*]</p> | -0.0829      |
| FCFP_2                                        | 16                | <p>AND Enantiomer</p>  <p>[*][c](:[*]):[*]</p>                       | -0.0512      |

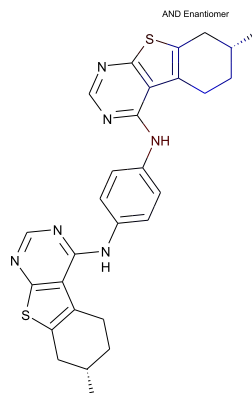
 $C_{28}H_{28}N_6S_2$ 

Molecular Weight: 512.69212

ALogP: 7.842

Rotatable Bonds: 4

Acceptors: 6

Donors: 2

### Model Prediction

Prediction: 0.0912

Unit: g/kg\_body\_weight

Mahalanobis Distance: 13.2

Mahalanobis Distance p-value: 6.77e-011

Mahalanobis Distance: The Mahalanobis distance (MD) is a generalization of the Euclidean distance that accounts for correlations among the X properties. It is calculated as the distance to the center of the training data. The larger the MD, the less trustworthy the prediction.

Mahalanobis Distance p-value: The p-value gives the fraction of training data with an MD greater than or equal to the one for the given sample, assuming normally distributed data. The smaller the p-value, the less trustworthy the prediction. For highly non-normal X properties (e.g., fingerprints), the MD p-value is wildly inaccurate.

### Structural Similar Compounds

| Name                        | C.I.PIGMENT RED 23 | SALICYLAZOSULFAPYRIDINE | C.I.PIGMENT RED 3 |
|-----------------------------|--------------------|-------------------------|-------------------|
| Structure                   |                    |                         |                   |
| Actual Endpoint (-log C)    | 2.30052            | 3.375                   | 2.65635           |
| Predicted Endpoint (-log C) | 3.55333            | 2.80292                 | 2.97957           |
| Distance                    | 0.888              | 1.031                   | 1.059             |
| Reference                   | NCI/NTP TR-411     | NCI/NTP TR-457          | NCI/NTP TR-407    |

### Model Applicability

Unknown features are fingerprint features in the query molecule, but not found or appearing too infrequently in the training set.

1. ALogP out of range. Value: 7.842. Training min, max, mean, SD: -4.271, 7.574, 2.3494, 1.981.
2. Num\_AromaticRings out of range. Value: 5. Training min, max, mean, SD: 0, 4, 1.1685, 0.8469.
3. OPS PC8 out of range. Value: 4.5344. Training min, max, SD, explained variance: -3.8548, 3.9137, 1.331, 0.0400.
4. OPS PC9 out of range. Value: 3.4665. Training min, max, SD, explained variance: -2.8548, 3.3954, 1.263, 0.0360.
5. OPS PC10 out of range. Value: 3.814. Training min, max, SD, explained variance: -4.0578, 3.2378, 1.25, 0.0353.
6. Unknown FCFP\_2 feature: -124685461: [\*]:n:c:n:[\*]

### Feature Contribution

#### Top features for positive contribution

| Fingerprint | Bit/Smiles | Feature Structure | Score |
|-------------|------------|-------------------|-------|
|             |            |                   |       |



|                                               |                   |                                                                                                                                                        |              |
|-----------------------------------------------|-------------------|--------------------------------------------------------------------------------------------------------------------------------------------------------|--------------|
| FCFP_2                                        | 3                 | <p>AND Enantiomer</p> 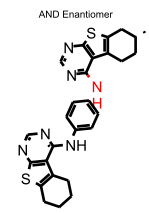 <p>[*]N[*]</p>                                | 0.0737       |
| FCFP_2                                        | 17                | <p>AND Enantiomer</p>  <p>[*]:s[*]</p>                              | 0.0441       |
| FCFP_2                                        | 590925877         | <p>AND Enantiomer</p>  <p>[*]N[c](:[cH]:[*]):[cH]:[*]</p>           | 0.00762      |
| <b>Top Features for negative contribution</b> |                   |                                                                                                                                                        |              |
| <b>Fingerprint</b>                            | <b>Bit/Smiles</b> | <b>Feature Structure</b>                                                                                                                               | <b>Score</b> |
| FCFP_2                                        | -1272798659       | <p>AND Enantiomer</p>  <p>[*]CCC([*])[*]</p>                       | -0.111       |
| FCFP_2                                        | 203677720         | <p>AND Enantiomer</p>  <p>[*]C[c]1:[c]([*]):[*]:[*]:[c]:1:[*]</p> | -0.0829      |

|        |    |                                                                                                                                  |         |
|--------|----|----------------------------------------------------------------------------------------------------------------------------------|---------|
| FCFP_2 | 16 | <p>AND Enantiomer</p> 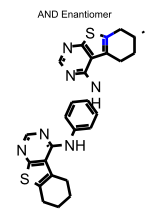 <p>[*][c](:[*]):[*]</p> | -0.0512 |
|--------|----|----------------------------------------------------------------------------------------------------------------------------------|---------|

# Erlotinib

# TOPKAT\_Rat\_Maximum\_Tolerated\_Dose\_Feed

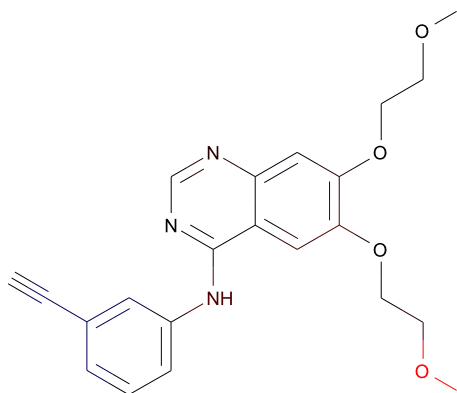

$C_{22}H_{23}N_3O_4$

Molecular Weight: 393.43572

ALogP: 4.309

Rotatable Bonds: 10

Acceptors: 7

Donors: 1

## Structural Similar Compounds

| Name                        | BUTYL BENZYL PHTHALATE | 3,3'-DIMETHOXYBENZIDINE-4,4'-DIISOCYANATE | PYRILAMINE                   |
|-----------------------------|------------------------|-------------------------------------------|------------------------------|
| Structure                   |                        |                                           |                              |
| Actual Endpoint (-log C)    | 2.79569                | 2.17504                                   | 3.32511                      |
| Predicted Endpoint (-log C) | 3.18498                | 3.78717                                   | 3.65163                      |
| Distance                    | 0.758                  | 0.795                                     | 0.820                        |
| Reference                   | NCI/NTP TR-458         | NCI/NTP TR-128                            | NCI/NTP Report 10, Nov. 1987 |

## Model Prediction

Prediction: 0.0828

Unit: g/kg\_body\_weight

Mahalanobis Distance: 9.37

Mahalanobis Distance p-value: 0.000417

Mahalanobis Distance: The Mahalanobis distance (MD) is a generalization of the Euclidean distance that accounts for correlations among the X properties. It is calculated as the distance to the center of the training data. The larger the MD, the less trustworthy the prediction.

Mahalanobis Distance p-value: The p-value gives the fraction of training data with an MD greater than or equal to the one for the given sample, assuming normally distributed data. The smaller the p-value, the less trustworthy the prediction. For highly non-normal X properties (e.g., fingerprints), the MD p-value is wildly inaccurate.

## Model Applicability

Unknown features are fingerprint features in the query molecule, but not found or appearing too infrequently in the training set.

1. All properties and OPS components are within expected ranges.
2. Unknown FCFP\_2 feature: -124685461: [\*]:n:c:n:[\*]
3. Unknown FCFP\_2 feature: 902193919: [\*]:c[:[\*])C#C
4. Unknown FCFP\_2 feature: 131784192: [\*]C#C

## Feature Contribution

### Top features for positive contribution

| Fingerprint | Bit/Smiles | Feature Structure | Score |
|-------------|------------|-------------------|-------|
| FCFP_2      | 136627117  | <br>[*]OC         | 0.173 |

|                                               |                   |                                                                                                                               |              |
|-----------------------------------------------|-------------------|-------------------------------------------------------------------------------------------------------------------------------|--------------|
| FCFP_2                                        | -1143715940       | 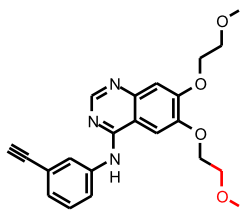<br>[*]COC                                  | 0.095        |
| FCFP_2                                        | 1036089772        | <br>[*]:[c](:[*])OC                        | 0.0749       |
| <b>Top Features for negative contribution</b> |                   |                                                                                                                               |              |
| <b>Fingerprint</b>                            | <b>Bit/Smiles</b> | <b>Feature Structure</b>                                                                                                      | <b>Score</b> |
| FCFP_2                                        | 203677720         | <br>[*]C[c]1:[c]([*]):[*]<br>:[*]:[c]:1[*] | -0.0829      |
| FCFP_2                                        | 1                 | <br>[*]O[*]                               | -0.0796      |
| FCFP_2                                        | 16                | <br>[*][c](:[*]):[*]                     | -0.0512      |



5a

TOPKAT\_Rat\_Maximum\_Tolerated\_Dose\_Gavage

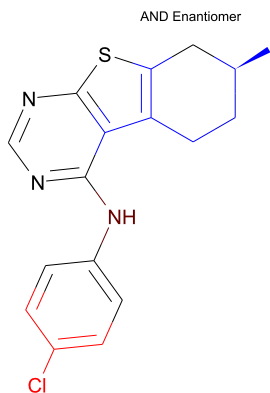C<sub>17</sub>H<sub>16</sub>ClN<sub>3</sub>S

Molecular Weight: 329.84704

ALogP: 5.5

Rotatable Bonds: 2

Acceptors: 3

Donors: 1

**Model Prediction**

Prediction: 0.00765

Unit: g/kg\_body\_weight

Mahalanobis Distance: 9.61

Mahalanobis Distance p-value: 1.91e-005

Mahalanobis Distance: The Mahalanobis distance (MD) is a generalization of the Euclidean distance that accounts for correlations among the X properties. It is calculated as the distance to the center of the training data. The larger the MD, the less trustworthy the prediction.

Mahalanobis Distance p-value: The p-value gives the fraction of training data with an MD greater than or equal to the one for the given sample, assuming normally distributed data. The smaller the p-value, the less trustworthy the prediction. For highly non-normal X properties (e.g., fingerprints), the MD p-value is wildly inaccurate.

**Structural Similar Compounds**

| Name                        | PHENYLBUTAZONE | o-BENZYL-p-CHLOROPHENOL | CHLORPHENIRAMINE MALEATE |
|-----------------------------|----------------|-------------------------|--------------------------|
| Structure                   |                |                         |                          |
| Actual Endpoint (-log C)    | 3.48909        | 3.26063                 | 3.96188                  |
| Predicted Endpoint (-log C) | 3.17333        | 3.64448                 | 3.83117                  |
| Distance                    | 0.862          | 0.886                   | 0.887                    |
| Reference                   | NCI/NTP TR-367 | NCI/NTP TR-424          | NCI/NTP TR-317           |

**Model Applicability**

Unknown features are fingerprint features in the query molecule, but not found or appearing too infrequently in the training set.

1. Num\_AromaticRings out of range. Value: 3. Training min, max, mean, SD: 0, 2, 0.5625, 0.693.
2. OPS PC7 out of range. Value: -2.8755. Training min, max, SD, explained variance: -2.8003, 2.9332, 1.16, 0.0416.
3. Unknown FCFP\_2 feature: -1564473960: [\*]:n:[c]1:s:[\*]:[\*]:[c]:1:[\*]
4. Unknown FCFP\_2 feature: -124685461: [\*]:n:c:n:[\*]
5. Unknown FCFP\_2 feature: 1293778554: [\*]:[c](:[\*])N[c](:[\*]):[\*]

**Feature Contribution****Top features for positive contribution**

| Fingerprint | Bit/Smiles | Feature Structure | Score |
|-------------|------------|-------------------|-------|
| FCFP_2      | 32         | <br>[*]Cl         | 0.526 |

|                                               |                   |                                                                                                                                                             |              |
|-----------------------------------------------|-------------------|-------------------------------------------------------------------------------------------------------------------------------------------------------------|--------------|
| FCFP_2                                        | 367998008         | <p>AND Enantiomer</p> 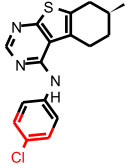 <p>[*].[cH]:[c](Cl):[cH]<br/>:[*]</p>             | 0.413        |
| FCFP_2                                        | 3                 | <p>AND Enantiomer</p>  <p>[*]N[*]</p>                                    | 0.104        |
| <b>Top Features for negative contribution</b> |                   |                                                                                                                                                             |              |
| <b>Fingerprint</b>                            | <b>Bit/Smiles</b> | <b>Feature Structure</b>                                                                                                                                    | <b>Score</b> |
| FCFP_2                                        | 136597326         | <p>AND Enantiomer</p>  <p>[*]C([*])C</p>                                 | -0.489       |
| FCFP_2                                        | 203677720         | <p>AND Enantiomer</p>  <p>[*]C[c]1:[c]([*]):[*]<br/>:[*]:[c]:1:[*]</p> | -0.406       |
| FCFP_2                                        | 0                 | <p>AND Enantiomer</p>  <p>[*]C[*]</p>                                  | -0.29        |





5b

TOPKAT\_Rat\_Maximum\_Tolerated\_Dose\_Gavage

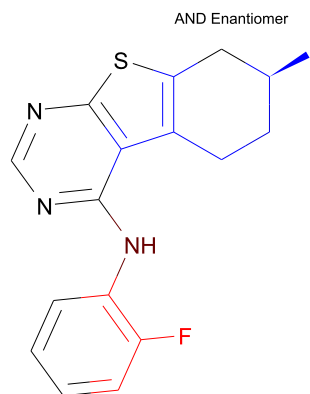

$C_{17}H_{16}FN_3S$   
 Molecular Weight: 313.39244  
 ALogP: 5.041  
 Rotatable Bonds: 2  
 Acceptors: 3  
 Donors: 1

### Model Prediction

Prediction: 0.00972  
 Unit: g/kg\_body\_weight  
 Mahalanobis Distance: 9.46  
 Mahalanobis Distance p-value: 3.06e-005

Mahalanobis Distance: The Mahalanobis distance (MD) is a generalization of the Euclidean distance that accounts for correlations among the X properties. It is calculated as the distance to the center of the training data. The larger the MD, the less trustworthy the prediction.  
 Mahalanobis Distance p-value: The p-value gives the fraction of training data with an MD greater than or equal to the one for the given sample, assuming normally distributed data. The smaller the p-value, the less trustworthy the prediction. For highly non-normal X properties (e.g., fingerprints), the MD p-value is wildly inaccurate.

### Structural Similar Compounds

| Name                        | PHENYLBUTAZONE | o-BENZYL-p-CHLOROPHENOL | CHLORPHENIRAMINE MALEATE |
|-----------------------------|----------------|-------------------------|--------------------------|
| Structure                   |                |                         |                          |
| Actual Endpoint (-log C)    | 3.48909        | 3.26063                 | 3.96188                  |
| Predicted Endpoint (-log C) | 3.17333        | 3.64448                 | 3.83117                  |
| Distance                    | 0.845          | 0.861                   | 0.867                    |
| Reference                   | NCI/NTP TR-367 | NCI/NTP TR-424          | NCI/NTP TR-317           |

### Model Applicability

Unknown features are fingerprint features in the query molecule, but not found or appearing too infrequently in the training set.

1. Num\_AromaticRings out of range. Value: 3. Training min, max, mean, SD: 0, 2, 0.5625, 0.693.
2. OPS PC7 out of range. Value: -2.8344. Training min, max, SD, explained variance: -2.8003, 2.9332, 1.16, 0.0416.
3. Unknown FCFP\_2 feature: -1564473960: [\*]:n:[c]1:s:[\*]:[\*]:[c]:1:[\*]
4. Unknown FCFP\_2 feature: -124685461: [\*]:n:c:n:[\*]
5. Unknown FCFP\_2 feature: 1293778554: [\*]:[c](:[\*])N[c](:[\*]):[\*]

### Feature Contribution

#### Top features for positive contribution

| Fingerprint | Bit/Smiles | Feature Structure                  | Score |
|-------------|------------|------------------------------------|-------|
| FCFP_2      | 32         | <p>AND Enantiomer</p> <p>[*]Cl</p> | 0.526 |

|                                               |                   |                                                                                                                                                             |              |
|-----------------------------------------------|-------------------|-------------------------------------------------------------------------------------------------------------------------------------------------------------|--------------|
| FCFP_2                                        | 367998008         | <p>AND Enantiomer</p> 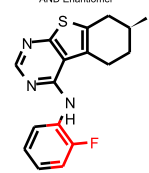 <p>[*]:[cH]:[c](Cl):[cH]<br/>:[*]</p>             | 0.413        |
| FCFP_2                                        | 3                 | <p>AND Enantiomer</p>  <p>[*]N[*]</p>                                    | 0.104        |
| <b>Top Features for negative contribution</b> |                   |                                                                                                                                                             |              |
| <b>Fingerprint</b>                            | <b>Bit/Smiles</b> | <b>Feature Structure</b>                                                                                                                                    | <b>Score</b> |
| FCFP_2                                        | 136597326         | <p>AND Enantiomer</p>  <p>[*]C([*])C</p>                                 | -0.489       |
| FCFP_2                                        | 203677720         | <p>AND Enantiomer</p>  <p>[*]C[c]1:[c]([*]):[*]<br/>:[*]:[c]:1:[*]</p> | -0.406       |
| FCFP_2                                        | 0                 | <p>AND Enantiomer</p>  <p>[*]C[*]</p>                                  | -0.29        |



5c

TOPKAT\_Rat\_Maximum\_Tolerated\_Dose\_Gavage

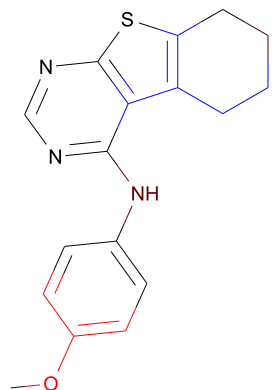C<sub>17</sub>H<sub>17</sub>N<sub>3</sub>OS

Molecular Weight: 311.40138

ALogP: 4.568

Rotatable Bonds: 3

Acceptors: 4

Donors: 1

**Model Prediction**

Prediction: 0.00084

Unit: g/kg\_body\_weight

Mahalanobis Distance: 9.84

Mahalanobis Distance p-value: 9.32e-006

Mahalanobis Distance: The Mahalanobis distance (MD) is a generalization of the Euclidean distance that accounts for correlations among the X properties. It is calculated as the distance to the center of the training data. The larger the MD, the less trustworthy the prediction.

Mahalanobis Distance p-value: The p-value gives the fraction of training data with an MD greater than or equal to the one for the given sample, assuming normally distributed data. The smaller the p-value, the less trustworthy the prediction. For highly non-normal X properties (e.g., fingerprints), the MD p-value is wildly inaccurate.

**Structural Similar Compounds**

| Name                        | 8-METHOXYPSORALEN | PHENYLBUTAZONE | PROMETHAZINE.HCL |
|-----------------------------|-------------------|----------------|------------------|
| Structure                   |                   |                |                  |
| Actual Endpoint (-log C)    | 3.45978           | 3.48909        | 3.93152          |
| Predicted Endpoint (-log C) | 4.14745           | 3.17333        | 4.72433          |
| Distance                    | 0.819             | 0.870          | 0.902            |
| Reference                   | NCI/NTP TR-359    | NCI/NTP TR-367 | NCI/NTP TR-425   |

**Model Applicability**

Unknown features are fingerprint features in the query molecule, but not found or appearing too infrequently in the training set.

1. Num\_AromaticRings out of range. Value: 3. Training min, max, mean, SD: 0, 2, 0.5625, 0.693.
2. OPS\_PC6 out of range. Value: -3.1044. Training min, max, SD, explained variance: -2.4321, 2.9885, 1.256, 0.0488.
3. Unknown FCFP\_2 feature: -1564473960: [\*]:n:[c]1:s:[\*]:[\*]:[c]:1:[\*]
4. Unknown FCFP\_2 feature: -124685461: [\*]:n:c:n:[\*]
5. Unknown FCFP\_2 feature: 1293778554: [\*]:[c]:([\*])N[c]:([\*]):[\*]

**Feature Contribution****Top features for positive contribution**

| Fingerprint | Bit/Smiles | Feature Structure              | Score |
|-------------|------------|--------------------------------|-------|
| FCFP_2      | 332760439  | <br>[*]O[e]([cH]:[*]):[cH]:[*] | 0.672 |

|                                               |                   |                                                                                                                                |              |
|-----------------------------------------------|-------------------|--------------------------------------------------------------------------------------------------------------------------------|--------------|
| FCFP_2                                        | 1                 | 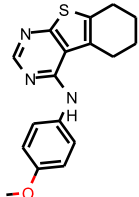<br>[*]O[*]                                 | 0.511        |
| FCFP_2                                        | 3                 | <br>[*]N[*]                                 | 0.104        |
| <b>Top Features for negative contribution</b> |                   |                                                                                                                                |              |
| <b>Fingerprint</b>                            | <b>Bit/Smiles</b> | <b>Feature Structure</b>                                                                                                       | <b>Score</b> |
| FCFP_2                                        | 203677720         | <br>[*]C[c]1:[c]([*]):[*]<br>:[*]:[c]:1:[*] | -0.406       |
| FCFP_2                                        | 0                 | <br>[*]C[*]                               | -0.29        |

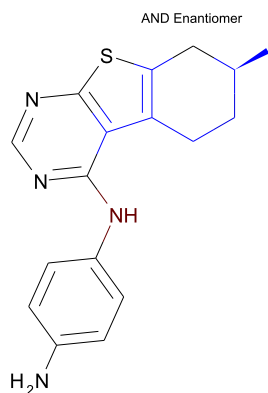

$C_{17}H_{18}N_4S$

Molecular Weight: 310.41662

ALogP: 4.089

Rotatable Bonds: 2

Acceptors: 4

Donors: 2

### Model Prediction

Prediction: 0.067

Unit: g/kg\_body\_weight

Mahalanobis Distance: 10.5

Mahalanobis Distance p-value: 1.12e-006

Mahalanobis Distance: The Mahalanobis distance (MD) is a generalization of the Euclidean distance that accounts for correlations among the X properties. It is calculated as the distance to the center of the training data. The larger the MD, the less trustworthy the prediction.

Mahalanobis Distance p-value: The p-value gives the fraction of training data with an MD greater than or equal to the one for the given sample, assuming normally distributed data. The smaller the p-value, the less trustworthy the prediction. For highly non-normal X properties (e.g., fingerprints), the MD p-value is wildly inaccurate.

### Structural Similar Compounds

| Name                        | SULFISOOXAZOLE | OCHRATOXIN     | 2-MERCAPTOBENZOTHIASOLE |
|-----------------------------|----------------|----------------|-------------------------|
| Structure                   |                |                |                         |
| Actual Endpoint (-log C)    | 2.82494        | 6.28396        | 2.34829                 |
| Predicted Endpoint (-log C) | 3.0705         | 5.12358        | 3.82125                 |
| Distance                    | 0.758          | 0.915          | 0.951                   |
| Reference                   | NCI/NTP TR-138 | NCI/NTP TR-358 | NCI/NTP TR-332          |

### Model Applicability

Unknown features are fingerprint features in the query molecule, but not found or appearing too infrequently in the training set.

1. Num\_AromaticRings out of range. Value: 3. Training min, max, mean, SD: 0, 2, 0.5625, 0.693.
2. OPS\_PC9 out of range. Value: -2.7349. Training min, max, SD, explained variance: -2.7086, 2.9267, 1.019, 0.0321.
3. Unknown FCFP\_2 feature: -1564473960: [\*]:n:[c]1:s:[\*]:[\*]:[c]:1:[\*]
4. Unknown FCFP\_2 feature: -124685461: [\*]:n:c:n:[\*]
5. Unknown FCFP\_2 feature: 1293778554: [\*]:[c](:[\*])N[c](:[\*]):[\*]

### Feature Contribution

#### Top features for positive contribution

| Fingerprint | Bit/Smiles | Feature Structure | Score |
|-------------|------------|-------------------|-------|
|             |            |                   |       |

|                                               |                   |                                                                                                                                                             |              |
|-----------------------------------------------|-------------------|-------------------------------------------------------------------------------------------------------------------------------------------------------------|--------------|
| FCFP_2                                        | 3                 | <p>AND Enantiomer</p> 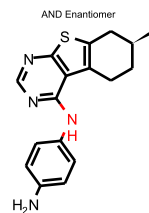 <p>[*]N[*]</p>                                     | 0.104        |
| FCFP_2                                        | -1272798659       | <p>AND Enantiomer</p>  <p>[*]CCC([*])[*]</p>                             | 0.0703       |
| <b>Top Features for negative contribution</b> |                   |                                                                                                                                                             |              |
| <b>Fingerprint</b>                            | <b>Bit/Smiles</b> | <b>Feature Structure</b>                                                                                                                                    | <b>Score</b> |
| FCFP_2                                        | 136597326         | <p>AND Enantiomer</p>  <p>[*]C([*])C</p>                                 | -0.489       |
| FCFP_2                                        | 203677720         | <p>AND Enantiomer</p>  <p>[*]C[c]1:[c]([*]):[*]<br/>:[*]:[c]:1:[*]</p> | -0.406       |
| FCFP_2                                        | 0                 | <p>AND Enantiomer</p>  <p>[*]C[*]</p>                                  | -0.29        |





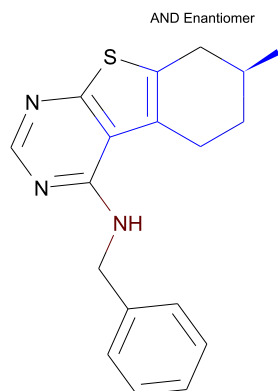

$C_{18}H_{19}N_3S$

Molecular Weight: 309.42856

ALogP: 4.678

Rotatable Bonds: 3

Acceptors: 3

Donors: 1

### Model Prediction

Prediction: 0.152

Unit: g/kg\_body\_weight

Mahalanobis Distance: 10.1

Mahalanobis Distance p-value: 4.04e-006

Mahalanobis Distance: The Mahalanobis distance (MD) is a generalization of the Euclidean distance that accounts for correlations among the X properties. It is calculated as the distance to the center of the training data. The larger the MD, the less trustworthy the prediction.

Mahalanobis Distance p-value: The p-value gives the fraction of training data with an MD greater than or equal to the one for the given sample, assuming normally distributed data. The smaller the p-value, the less trustworthy the prediction. For highly non-normal X properties (e.g., fingerprints), the MD p-value is wildly inaccurate.

### Structural Similar Compounds

| Name                        | PHENYLBUTAZONE | PROMETHAZINE.HCL | 8-METHOXYPBORALEN |
|-----------------------------|----------------|------------------|-------------------|
| Structure                   |                |                  |                   |
| Actual Endpoint (-log C)    | 3.48909        | 3.93152          | 3.45978           |
| Predicted Endpoint (-log C) | 3.17333        | 4.72433          | 4.14745           |
| Distance                    | 0.799          | 0.872            | 0.883             |
| Reference                   | NCI/NTP TR-367 | NCI/NTP TR-425   | NCI/NTP TR-359    |

### Model Applicability

Unknown features are fingerprint features in the query molecule, but not found or appearing too infrequently in the training set.

1. Num\_AromaticRings out of range. Value: 3. Training min, max, mean, SD: 0, 2, 0.5625, 0.693.
2. Unknown FCFP\_2 feature: -1564473960: [\*]:n:[c]1s:[\*]:[\*]:[c]:1:[\*]
3. Unknown FCFP\_2 feature: -124685461: [\*]:n:c:n:[\*]

### Feature Contribution

#### Top features for positive contribution

| Fingerprint | Bit/Smiles | Feature Structure | Score |
|-------------|------------|-------------------|-------|
| FCFP_2      | 3          | <p>[*]N[*]</p>    | 0.104 |

|                                               |                   |                                                                                                                                                           |              |
|-----------------------------------------------|-------------------|-----------------------------------------------------------------------------------------------------------------------------------------------------------|--------------|
| FCFP_2                                        | -1272798659       | <p>AND Enantiomer</p> 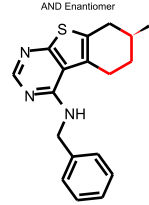 <p>[*]CCC([*])[*]</p>                           | 0.0703       |
| <b>Top Features for negative contribution</b> |                   |                                                                                                                                                           |              |
| <b>Fingerprint</b>                            | <b>Bit/Smiles</b> | <b>Feature Structure</b>                                                                                                                                  | <b>Score</b> |
| FCFP_2                                        | 136597326         | <p>AND Enantiomer</p>  <p>[*]C([*])C</p>                               | -0.489       |
| FCFP_2                                        | 203677720         | <p>AND Enantiomer</p>  <p>[*]C[c]1:[c]([*]):[*]<br/>:[*]:[c]:1:[*]</p> | -0.406       |
| FCFP_2                                        | 0                 | <p>AND Enantiomer</p>  <p>[*]C[*]</p>                                | -0.29        |

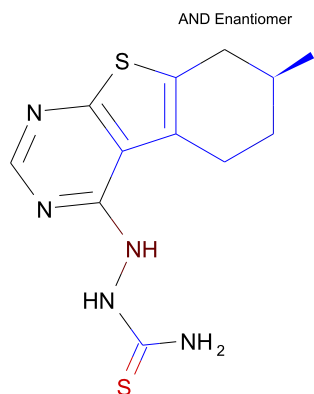

$C_{12}H_{15}N_5S_2$   
 Molecular Weight: 293.411  
 ALogP: 3.209  
 Rotatable Bonds: 3  
 Acceptors: 4  
 Donors: 3

### Model Prediction

Prediction: 0.32  
 Unit: g/kg\_body\_weight  
 Mahalanobis Distance: 10.7  
 Mahalanobis Distance p-value: 5.71e-007

Mahalanobis Distance: The Mahalanobis distance (MD) is a generalization of the Euclidean distance that accounts for correlations among the X properties. It is calculated as the distance to the center of the training data. The larger the MD, the less trustworthy the prediction.  
 Mahalanobis Distance p-value: The p-value gives the fraction of training data with an MD greater than or equal to the one for the given sample, assuming normally distributed data. The smaller the p-value, the less trustworthy the prediction. For highly non-normal X properties (e.g., fingerprints), the MD p-value is wildly inaccurate.

### Structural Similar Compounds

| Name                        | SULFISOOXAZOLE | OCHRATOXIN     | HC RED 3       |
|-----------------------------|----------------|----------------|----------------|
| Structure                   |                |                |                |
| Actual Endpoint (-log C)    | 2.82494        | 6.28396        | 2.59592        |
| Predicted Endpoint (-log C) | 3.0705         | 5.12358        | 3.285          |
| Distance                    | 0.745          | 0.779          | 0.893          |
| Reference                   | NCI/NTP TR-138 | NCI/NTP TR-358 | NCI/NTP TR-281 |

### Model Applicability

Unknown features are fingerprint features in the query molecule, but not found or appearing too infrequently in the training set.

1. Molecular\_PolarSASA out of range. Value: 232.59. Training min, max, mean, SD: 0, 223.97, 50.816, 55.15.
2. OPS PC9 out of range. Value: -2.8528. Training min, max, SD, explained variance: -2.7086, 2.9267, 1.019, 0.0321.
3. Unknown FCFP\_2 feature: -1564473960: [\*]:n:[c]1:s:[\*]:[\*]:[c]:1:[\*]
4. Unknown FCFP\_2 feature: -124685461: [\*]:n:c:n:[\*]
5. Unknown FCFP\_2 feature: 1294344583: [\*]NN[c](:[\*]):[\*]
6. Unknown FCFP\_2 feature: -885461129: [\*]NNC(=[\*])[\*]
7. Unknown FCFP\_2 feature: 1499521844: [\*]NC(=S)N

### Feature Contribution

#### Top features for positive contribution

| Fingerprint | Bit/Smiles | Feature Structure | Score |
|-------------|------------|-------------------|-------|
|             |            |                   |       |

|        |             |                                                                                                                                 |        |
|--------|-------------|---------------------------------------------------------------------------------------------------------------------------------|--------|
| FCFP_2 | 1           | <p>AND Enantiomer</p> 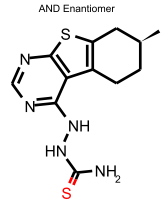 <p>[*]O[*]</p>        | 0.511  |
| FCFP_2 | 3           | <p>AND Enantiomer</p>  <p>[*]N[*]</p>        | 0.104  |
| FCFP_2 | -1272798659 | <p>AND Enantiomer</p>  <p>[*]CCC([*])[*]</p> | 0.0703 |

**Top Features for negative contribution**

| Fingerprint | Bit/Smiles | Feature Structure                                                                                                                                           | Score  |
|-------------|------------|-------------------------------------------------------------------------------------------------------------------------------------------------------------|--------|
| FCFP_2      | 136597326  | <p>AND Enantiomer</p> 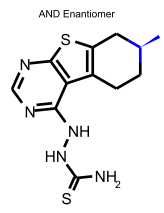 <p>[*]C([*])C</p>                                | -0.489 |
| FCFP_2      | 203677720  | <p>AND Enantiomer</p>  <p>[*]C[c]1:[c]([*]):[*]<br/>:[*]:[c]:1:[*]</p> | -0.406 |

|        |            |                                                                                                                              |        |
|--------|------------|------------------------------------------------------------------------------------------------------------------------------|--------|
| FCFP_2 | 1872154524 | <p>AND Enantiomer</p> 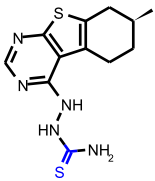 <p>[*]C(=S)[*]</p> | -0.307 |
|--------|------------|------------------------------------------------------------------------------------------------------------------------------|--------|

9a

TOPKAT\_Rat\_Maximum\_Tolerated\_Dose\_Gavage

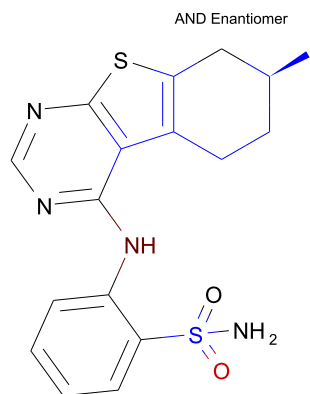C<sub>17</sub>H<sub>18</sub>N<sub>4</sub>O<sub>2</sub>S<sub>2</sub>

Molecular Weight: 374.48042

ALogP: 3.541

Rotatable Bonds: 3

Acceptors: 5

Donors: 2

**Model Prediction**

Prediction: 0.0657

Unit: g/kg\_body\_weight

Mahalanobis Distance: 9.78

Mahalanobis Distance p-value: 1.14e-005

Mahalanobis Distance: The Mahalanobis distance (MD) is a generalization of the Euclidean distance that accounts for correlations among the X properties. It is calculated as the distance to the center of the training data. The larger the MD, the less trustworthy the prediction.

Mahalanobis Distance p-value: The p-value gives the fraction of training data with an MD greater than or equal to the one for the given sample, assuming normally distributed data. The smaller the p-value, the less trustworthy the prediction. For highly non-normal X properties (e.g., fingerprints), the MD p-value is wildly inaccurate.

**Structural Similar Compounds**

| Name                        | SULFISOOXAZOLE | OCHRATOXIN     | PENICILLIN VK  |
|-----------------------------|----------------|----------------|----------------|
| Structure                   |                |                |                |
| Actual Endpoint (-log C)    | 2.82494        | 6.28396        | 2.54455        |
| Predicted Endpoint (-log C) | 3.0705         | 5.12358        | 3.9702         |
| Distance                    | 0.769          | 0.786          | 1.038          |
| Reference                   | NCI/NTP TR-138 | NCI/NTP TR-358 | NCI/NTP TR-336 |

**Model Applicability**

Unknown features are fingerprint features in the query molecule, but not found or appearing too infrequently in the training set.

1. Num\_AromaticRings out of range. Value: 3. Training min, max, mean, SD: 0, 2, 0.5625, 0.693.
2. OPS\_PC9 out of range. Value: -2.8441. Training min, max, SD, explained variance: -2.7086, 2.9267, 1.019, 0.0321.
3. Unknown FCFP\_2 feature: -1564473960: [\*]:n:[c]1:s:[\*]:[\*]:[c]:1:[\*]
4. Unknown FCFP\_2 feature: -124685461: [\*]:n:c:n:[\*]
5. Unknown FCFP\_2 feature: 1293778554: [\*]:[c]:([\*])N[c]:([\*]):[\*]

**Feature Contribution****Top features for positive contribution**

| Fingerprint | Bit/Smiles | Feature Structure                    | Score |
|-------------|------------|--------------------------------------|-------|
| FCFP_2      | 1          | <p>AND Enantiomer</p> <p>[*]O[*]</p> | 0.511 |

|                                               |                   |                                                                                                                                                             |              |
|-----------------------------------------------|-------------------|-------------------------------------------------------------------------------------------------------------------------------------------------------------|--------------|
| FCFP_2                                        | 3                 | <p>AND Enantiomer</p> 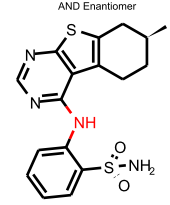 <p>[*]N[*]</p>                                    | 0.104        |
| FCFP_2                                        | -1272798659       | <p>AND Enantiomer</p>  <p>[*]CCC([*])[*]</p>                             | 0.0703       |
| <b>Top Features for negative contribution</b> |                   |                                                                                                                                                             |              |
| <b>Fingerprint</b>                            | <b>Bit/Smiles</b> | <b>Feature Structure</b>                                                                                                                                    | <b>Score</b> |
| FCFP_2                                        | 136597326         | <p>AND Enantiomer</p>  <p>[*]C([*])C</p>                                 | -0.489       |
| FCFP_2                                        | 203677720         | <p>AND Enantiomer</p>  <p>[*]C[c]1:[c]([*]):[*]<br/>:[*]:[c]:1:[*]</p> | -0.406       |
| FCFP_2                                        | 1872154524        | <p>AND Enantiomer</p>  <p>[*]C(=S)[*]</p>                              | -0.307       |





9b

TOPKAT\_Rat\_Maximum\_Tolerated\_Dose\_Gavage

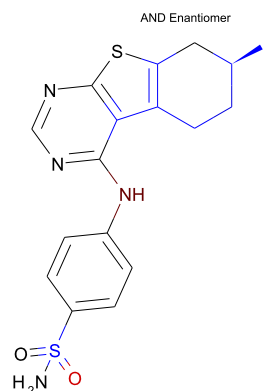C<sub>17</sub>H<sub>18</sub>N<sub>4</sub>O<sub>2</sub>S<sub>2</sub>

Molecular Weight: 374.48042

ALogP: 3.541

Rotatable Bonds: 3

Acceptors: 5

Donors: 2

**Model Prediction**

Prediction: 0.0657

Unit: g/kg\_body\_weight

Mahalanobis Distance: 9.78

Mahalanobis Distance p-value: 1.14e-005

Mahalanobis Distance: The Mahalanobis distance (MD) is a generalization of the Euclidean distance that accounts for correlations among the X properties. It is calculated as the distance to the center of the training data. The larger the MD, the less trustworthy the prediction.

Mahalanobis Distance p-value: The p-value gives the fraction of training data with an MD greater than or equal to the one for the given sample, assuming normally distributed data. The smaller the p-value, the less trustworthy the prediction. For highly non-normal X properties (e.g., fingerprints), the MD p-value is wildly inaccurate.

**Structural Similar Compounds**

| Name                        | SULFISOOXAZOLE | OCHRATOXIN     | PENICILLIN VK  |
|-----------------------------|----------------|----------------|----------------|
| Structure                   |                |                |                |
| Actual Endpoint (-log C)    | 2.82494        | 6.28396        | 2.54455        |
| Predicted Endpoint (-log C) | 3.0705         | 5.12358        | 3.9702         |
| Distance                    | 0.769          | 0.786          | 1.038          |
| Reference                   | NCI/NTP TR-138 | NCI/NTP TR-358 | NCI/NTP TR-336 |

**Model Applicability**

Unknown features are fingerprint features in the query molecule, but not found or appearing too infrequently in the training set.

1. Num\_AromaticRings out of range. Value: 3. Training min, max, mean, SD: 0, 2, 0.5625, 0.693.
2. OPS\_PC9 out of range. Value: -2.8441. Training min, max, SD, explained variance: -2.7086, 2.9267, 1.019, 0.0321.
3. Unknown FCFP\_2 feature: -1564473960: [\*]:n:[c]1:s:[\*]:[\*]:[c]:1:[\*]
4. Unknown FCFP\_2 feature: -124685461: [\*]:n:c:n:[\*]
5. Unknown FCFP\_2 feature: 1293778554: [\*]:[c]:([\*])N[c]:([\*]):[\*]

**Feature Contribution****Top features for positive contribution**

| Fingerprint | Bit/Smiles | Feature Structure | Score |
|-------------|------------|-------------------|-------|
| FCFP_2      | 1          | <br>[*]O[*]       | 0.511 |

|                                               |                   |                                                                                                                                                             |              |
|-----------------------------------------------|-------------------|-------------------------------------------------------------------------------------------------------------------------------------------------------------|--------------|
| FCFP_2                                        | 3                 | <p>AND Enantiomer</p> 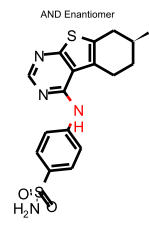 <p>[*]N[*]</p>                                     | 0.104        |
| FCFP_2                                        | -1272798659       | <p>AND Enantiomer</p>  <p>[*]CCC([*])[*]</p>                             | 0.0703       |
| <b>Top Features for negative contribution</b> |                   |                                                                                                                                                             |              |
| <b>Fingerprint</b>                            | <b>Bit/Smiles</b> | <b>Feature Structure</b>                                                                                                                                    | <b>Score</b> |
| FCFP_2                                        | 136597326         | <p>AND Enantiomer</p>  <p>[*]C([*])C</p>                                 | -0.489       |
| FCFP_2                                        | 203677720         | <p>AND Enantiomer</p>  <p>[*]C[c]1:[c]([*]):[*]<br/>:[*]:[c]:1:[*]</p> | -0.406       |
| FCFP_2                                        | 1872154524        | <p>AND Enantiomer</p>  <p>[*]C(=S)[*]</p>                              | -0.307       |



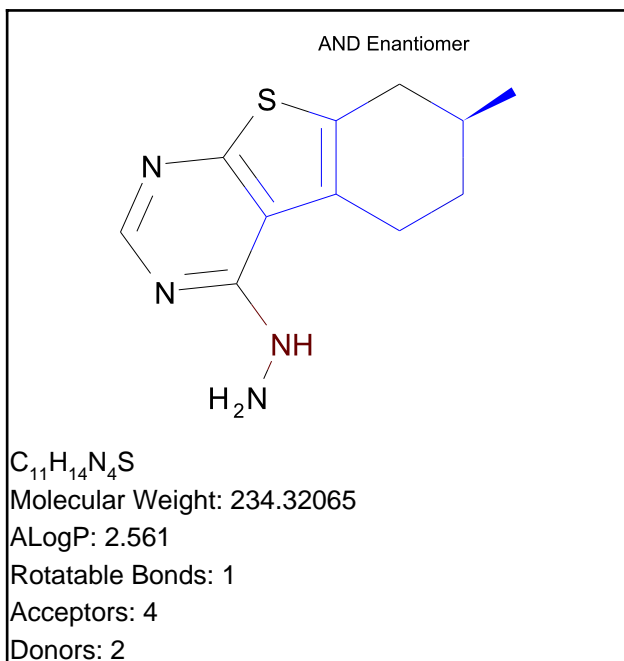

### Model Prediction

Prediction: 0.102

Unit: g/kg\_body\_weight

Mahalanobis Distance: 8.95

Mahalanobis Distance p-value: 0.00014

Mahalanobis Distance: The Mahalanobis distance (MD) is a generalization of the Euclidean distance that accounts for correlations among the X properties. It is calculated as the distance to the center of the training data. The larger the MD, the less trustworthy the prediction.

Mahalanobis Distance p-value: The p-value gives the fraction of training data with an MD greater than or equal to the one for the given sample, assuming normally distributed data. The smaller the p-value, the less trustworthy the prediction. For highly non-normal X properties (e.g., fingerprints), the MD p-value is wildly inaccurate.

### Structural Similar Compounds

| Name                        | SULFISOOXAZOLE                                                                      | 2-MERCAPTOBENZOTHIASOLE                                                             | 2-AMINO-5-NITROPHENOL                                                               |
|-----------------------------|-------------------------------------------------------------------------------------|-------------------------------------------------------------------------------------|-------------------------------------------------------------------------------------|
| Structure                   | 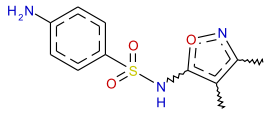 |  |  |
| Actual Endpoint (-log C)    | 2.82494                                                                             | 2.34829                                                                             | 2.88684                                                                             |
| Predicted Endpoint (-log C) | 3.0705                                                                              | 3.82125                                                                             | 3.28491                                                                             |
| Distance                    | 0.623                                                                               | 0.783                                                                               | 0.795                                                                               |
| Reference                   | NCI/NTP TR-138                                                                      | NCI/NTP TR-332                                                                      | NCI/NTP TR-334                                                                      |

### Model Applicability

Unknown features are fingerprint features in the query molecule, but not found or appearing too infrequently in the training set.

1. All properties and OPS components are within expected ranges.
2. Unknown FCFP\_2 feature: -1564473960: [\*]:n:[c]1:s:[\*]:[\*]:[c]:1:[\*]
3. Unknown FCFP\_2 feature: -124685461: [\*]:n:c:n:[\*]
4. Unknown FCFP\_2 feature: 1294344583: [\*]NN[c](:[\*]):[\*]
5. Unknown FCFP\_2 feature: 1070150408: [\*]NN

### Feature Contribution

#### Top features for positive contribution

| Fingerprint | Bit/Smiles | Feature Structure                                                                                                          | Score |
|-------------|------------|----------------------------------------------------------------------------------------------------------------------------|-------|
| FCFP_2      | 3          | <p>AND Enantiomer</p> 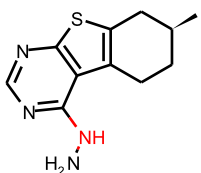 <p>[*]N[*]</p> | 0.104 |

|                                               |                   |                                                                                                                                                           |              |
|-----------------------------------------------|-------------------|-----------------------------------------------------------------------------------------------------------------------------------------------------------|--------------|
| FCFP_2                                        | -1272798659       | <p>AND Enantiomer</p> 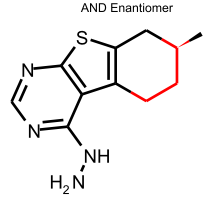 <p>[*]CCC([*])*</p>                             | 0.0703       |
| <b>Top Features for negative contribution</b> |                   |                                                                                                                                                           |              |
| <b>Fingerprint</b>                            | <b>Bit/Smiles</b> | <b>Feature Structure</b>                                                                                                                                  | <b>Score</b> |
| FCFP_2                                        | 136597326         | <p>AND Enantiomer</p>  <p>[*]C([*])C</p>                               | -0.489       |
| FCFP_2                                        | 203677720         | <p>AND Enantiomer</p>  <p>[*]C[c]1:[c]([*]):[*]<br/>:[*]:[c]:1:[*]</p> | -0.406       |
| FCFP_2                                        | 0                 | <p>AND Enantiomer</p>  <p>[*]C[*]</p>                                | -0.29        |

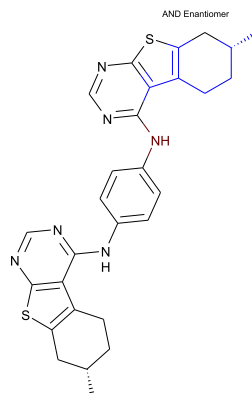
 $C_{28}H_{28}N_6S_2$ 

Molecular Weight: 512.69212

ALogP: 7.842

Rotatable Bonds: 4

Acceptors: 6

Donors: 2

### Model Prediction

Prediction: 0.00163

Unit: g/kg\_body\_weight

Mahalanobis Distance: 17.8

Mahalanobis Distance p-value: 9.44e-017

Mahalanobis Distance: The Mahalanobis distance (MD) is a generalization of the Euclidean distance that accounts for correlations among the X properties. It is calculated as the distance to the center of the training data. The larger the MD, the less trustworthy the prediction.

Mahalanobis Distance p-value: The p-value gives the fraction of training data with an MD greater than or equal to the one for the given sample, assuming normally distributed data. The smaller the p-value, the less trustworthy the prediction. For highly non-normal X properties (e.g., fingerprints), the MD p-value is wildly inaccurate.

### Structural Similar Compounds

| Name                        | OCHRATOXIN     | SULFISOOXAZOLE | PHENYLBUTAZONE |
|-----------------------------|----------------|----------------|----------------|
| Structure                   |                |                |                |
| Actual Endpoint (-log C)    | 6.28396        | 2.82494        | 3.48909        |
| Predicted Endpoint (-log C) | 5.12358        | 3.0705         | 3.17333        |
| Distance                    | 1.371          | 1.541          | 1.694          |
| Reference                   | NCI/NTP TR-358 | NCI/NTP TR-138 | NCI/NTP TR-367 |

### Model Applicability

Unknown features are fingerprint features in the query molecule, but not found or appearing too infrequently in the training set.

1. Molecular\_Weight out of range. Value: 512.69. Training min, max, mean, SD: 68.074, 434.63, 171.13, 85.06.
2. Num\_AromaticRings out of range. Value: 5. Training min, max, mean, SD: 0, 2, 0.5625, 0.693.
3. OPS\_PC6 out of range. Value: -3.2739. Training min, max, SD, explained variance: -2.4321, 2.9885, 1.256, 0.0488.
4. OPS\_PC9 out of range. Value: -2.9987. Training min, max, SD, explained variance: -2.7086, 2.9267, 1.019, 0.0321.
5. Unknown FCFP\_2 feature: -1564473960: [\*]:n:[c]1:s:[\*]:[\*]:[c]:1:[\*]
6. Unknown FCFP\_2 feature: -124685461: [\*]:n:c:n:[\*]
7. Unknown FCFP\_2 feature: 1293778554: [\*]:[c]:[\*]N[c]([\*]):[\*]

### Feature Contribution

#### Top features for positive contribution

| Fingerprint | Bit/Smiles | Feature Structure | Score |
|-------------|------------|-------------------|-------|
|             |            |                   |       |

|                                               |                   |                                                                                                                                                             |              |
|-----------------------------------------------|-------------------|-------------------------------------------------------------------------------------------------------------------------------------------------------------|--------------|
| FCFP_2                                        | 3                 | <p>AND Enantiomer</p> 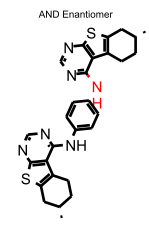 <p>[*]N[*]</p>                                     | 0.104        |
| FCFP_2                                        | -1272798659       | <p>AND Enantiomer</p>  <p>[*]CCC([*])[*]</p>                             | 0.0703       |
| <b>Top Features for negative contribution</b> |                   |                                                                                                                                                             |              |
| <b>Fingerprint</b>                            | <b>Bit/Smiles</b> | <b>Feature Structure</b>                                                                                                                                    | <b>Score</b> |
| FCFP_2                                        | 136597326         | <p>AND Enantiomer</p>  <p>[*]C([*])C</p>                                 | -0.489       |
| FCFP_2                                        | 203677720         | <p>AND Enantiomer</p>  <p>[*]C[c]1:[c]([*]):[*]<br/>:[*]:[c]:1:[*]</p> | -0.406       |
| FCFP_2                                        | 0                 | <p>AND Enantiomer</p>  <p>[*]C[*]</p>                                  | -0.29        |





# Erlotinib

# TOPKAT\_Rat\_Maximum\_Tolerated\_Dose\_Gavage

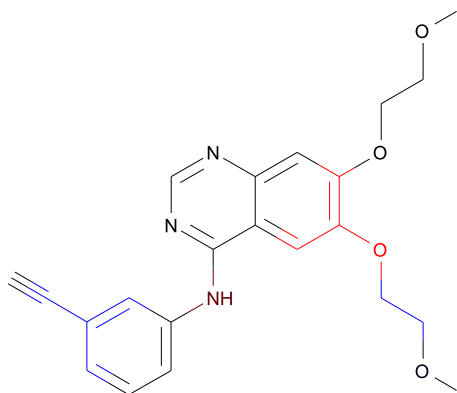

$C_{22}H_{23}N_3O_4$

Molecular Weight: 393.43572

ALogP: 4.309

Rotatable Bonds: 10

Acceptors: 7

Donors: 1

## Model Prediction

Prediction: 0.000344

Unit: g/kg\_body\_weight

Mahalanobis Distance: 11.7

Mahalanobis Distance p-value: 2.74e-008

Mahalanobis Distance: The Mahalanobis distance (MD) is a generalization of the Euclidean distance that accounts for correlations among the X properties. It is calculated as the distance to the center of the training data. The larger the MD, the less trustworthy the prediction.

Mahalanobis Distance p-value: The p-value gives the fraction of training data with an MD greater than or equal to the one for the given sample, assuming normally distributed data. The smaller the p-value, the less trustworthy the prediction. For highly non-normal X properties (e.g., fingerprints), the MD p-value is wildly inaccurate.

## Structural Similar Compounds

| Name                        | DIALLYL PHTHALATE                                                                   | OCHRATOXIN                                                                          | PROBENECID                                                                          |
|-----------------------------|-------------------------------------------------------------------------------------|-------------------------------------------------------------------------------------|-------------------------------------------------------------------------------------|
| Structure                   | 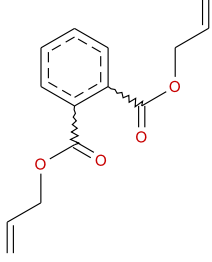 |  |  |
| Actual Endpoint (-log C)    | 3.3914                                                                              | 6.28396                                                                             | 2.85333                                                                             |
| Predicted Endpoint (-log C) | 3.50093                                                                             | 5.12358                                                                             | 2.4258                                                                              |
| Distance                    | 1.113                                                                               | 1.136                                                                               | 1.152                                                                               |
| Reference                   | NCI/NTP TR-284                                                                      | NCI/NTP TR-358                                                                      | NCI/NTP TR-395                                                                      |

## Model Applicability

Unknown features are fingerprint features in the query molecule, but not found or appearing too infrequently in the training set.

1. Num\_H\_Acceptors out of range. Value: 7. Training min, max, mean, SD: 0, 6, 1.6146, 1.644.
2. Num\_AromaticRings out of range. Value: 3. Training min, max, mean, SD: 0, 2, 0.5625, 0.693.
3. OPS\_PC6 out of range. Value: -3.0997. Training min, max, SD, explained variance: -2.4321, 2.9885, 1.256, 0.0488.
4. Unknown FCFP\_2 feature: -124685461: [\*]:n:c:n:[\*]
5. Unknown FCFP\_2 feature: 1293778554: [\*]:[c](:[\*])N[c](:[\*]):[\*]
6. Unknown FCFP\_2 feature: 902193919: [\*]:[c](:[\*])C#C
7. Unknown FCFP\_2 feature: 131784192: [\*]C#C

## Feature Contribution

### Top features for positive contribution

| Fingerprint | Bit/Smiles | Feature Structure | Score |
|-------------|------------|-------------------|-------|
|             |            |                   |       |

|                                               |                   |                                                                                                                                          |              |
|-----------------------------------------------|-------------------|------------------------------------------------------------------------------------------------------------------------------------------|--------------|
| FCFP_2                                        | 332760439         | 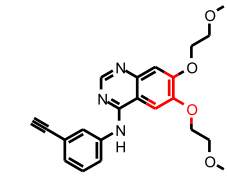<br><chem>[*]O[c](:[cH]:[*]):[cH]:[*]</chem>          | 0.672        |
| FCFP_2                                        | 1                 | <br><chem>[*]O[*]</chem>                              | 0.511        |
| FCFP_2                                        | 3                 | <br><chem>[*]N[*]</chem>                              | 0.104        |
| <b>Top Features for negative contribution</b> |                   |                                                                                                                                          |              |
| <b>Fingerprint</b>                            | <b>Bit/Smiles</b> | <b>Feature Structure</b>                                                                                                                 | <b>Score</b> |
| FCFP_2                                        | 203677720         | <br><chem>[*]C[c]1:[c]([*]):[*]:[*]:[c]:1[*]</chem> | -0.406       |
| FCFP_2                                        | 0                 | <br><chem>[*]C[*]</chem>                            | -0.29        |

|        |            |                                                                                                                                    |       |
|--------|------------|------------------------------------------------------------------------------------------------------------------------------------|-------|
| FCFP_2 | 1272768868 | 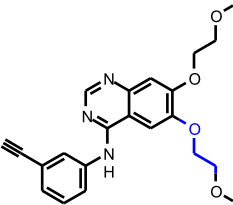 <p data-bbox="1444 321 1549 345">[*]CCO[*]</p> | 0.271 |
|--------|------------|------------------------------------------------------------------------------------------------------------------------------------|-------|

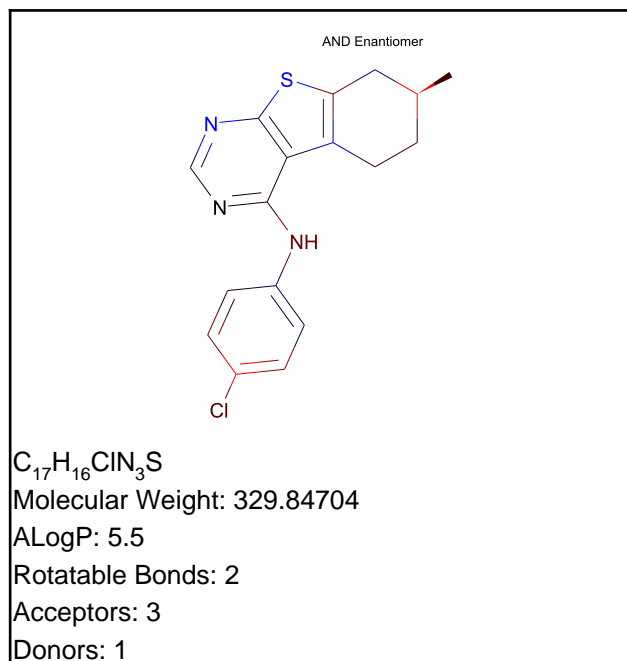

### Model Prediction

Prediction: 0.483

Unit: g/kg\_body\_weight

Mahalanobis Distance: 19.6

Mahalanobis Distance p-value: 1.23e-007

Mahalanobis Distance: The Mahalanobis distance (MD) is a generalization of the Euclidean distance that accounts for correlations among the X properties. It is calculated as the distance to the center of the training data. The larger the MD, the less trustworthy the prediction.

Mahalanobis Distance p-value: The p-value gives the fraction of training data with an MD greater than or equal to the one for the given sample, assuming normally distributed data. The smaller the p-value, the less trustworthy the prediction. For highly non-normal X properties (e.g., fingerprints), the MD p-value is wildly inaccurate.

### Structural Similar Compounds

| Name                        | FENTIAZAC                                                                           | BENOXAPROFEN                                                                        | .alpha.-(2-CHLOROPHENYL)-.alpha.-(4-CHLOROPHENYL)-5-PYRIMIDINE METHANOL             |
|-----------------------------|-------------------------------------------------------------------------------------|-------------------------------------------------------------------------------------|-------------------------------------------------------------------------------------|
| Structure                   | 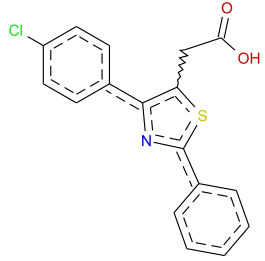 |  |  |
| Actual Endpoint (-log C)    | 2.907                                                                               | 3.408                                                                               | 2.122                                                                               |
| Predicted Endpoint (-log C) | 2.69613                                                                             | 2.85166                                                                             | 2.72534                                                                             |
| Distance                    | 0.554                                                                               | 0.558                                                                               | 0.592                                                                               |
| Reference                   | NIIRDN 6;APP-17;82                                                                  | YACHDS 9;4445;81                                                                    | FMCHA2 -;C254;89                                                                    |

### Model Applicability

Unknown features are fingerprint features in the query molecule, but not found or appearing too infrequently in the training set.

1. All properties and OPS components are within expected ranges.
2. Unknown ECFP\_2 feature: -1597579789: [\*]:n:[c]1:s:[\*]:[\*]:[c]:1:[\*]
3. Unknown FCFP\_6 feature: 16: [\*][c](:[\*]):[\*]
4. Unknown FCFP\_6 feature: 1747237384: [\*][c]1:[\*]:[\*]:[c](:[\*]):s:1
5. Unknown FCFP\_6 feature: -1564473960: [\*]:n:[c]1:s:[\*]:[\*]:[c]:1:[\*]
6. Unknown FCFP\_6 feature: -124685461: [\*]:n:[cH]:n:[\*]
7. Unknown FCFP\_6 feature: -1151884458: [\*]N[c](:n:[\*]):[c](:[\*]):[\*]
8. Unknown FCFP\_6 feature: 1293778554: [\*]:[c](:[\*])N[c](:[\*]):[\*]
9. Unknown FCFP\_6 feature: 1618154665: [\*][c](:[\*]):[cH]:[cH]:[\*]
10. Unknown FCFP\_6 feature: 71476542: [\*]:[c](:[\*])Cl

### Feature Contribution

#### Top features for positive contribution

| Fingerprint | Bit/Smiles | Feature Structure | Score |
|-------------|------------|-------------------|-------|
|             |            |                   |       |

|                                               |                   |                                                                                                                                  |              |
|-----------------------------------------------|-------------------|----------------------------------------------------------------------------------------------------------------------------------|--------------|
| ECFP_6                                        | 642810091         | <p>AND Enantiomer</p> 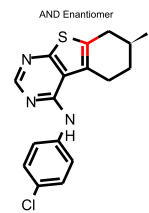 <p>[*][c](:[*]):[*]</p> | 0.281        |
| ECFP_6                                        | -1897341097       | <p>AND Enantiomer</p>  <p>[*]N[*]</p>         | 0.216        |
| ECFP_6                                        | 99947387          | <p>AND Enantiomer</p>  <p>[*]:[c](:[*])Cl</p> | 0.181        |
| <b>Top Features for negative contribution</b> |                   |                                                                                                                                  |              |
| <b>Fingerprint</b>                            | <b>Bit/Smiles</b> | <b>Feature Structure</b>                                                                                                         | <b>Score</b> |
| ECFP_6                                        | -817402818        | <p>AND Enantiomer</p>  <p>[*]Cl</p>          | -0.263       |
| ECFP_6                                        | 655739385         | <p>AND Enantiomer</p>  <p>[*]:n:[*]</p>     | -0.239       |

|        |           |                                                                                                                       |        |
|--------|-----------|-----------------------------------------------------------------------------------------------------------------------|--------|
| ECFP_6 | 734603939 | <p>AND Enantiomer</p> 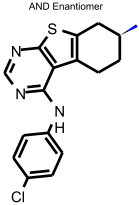 <p>[*]C</p> | -0.201 |
|--------|-----------|-----------------------------------------------------------------------------------------------------------------------|--------|

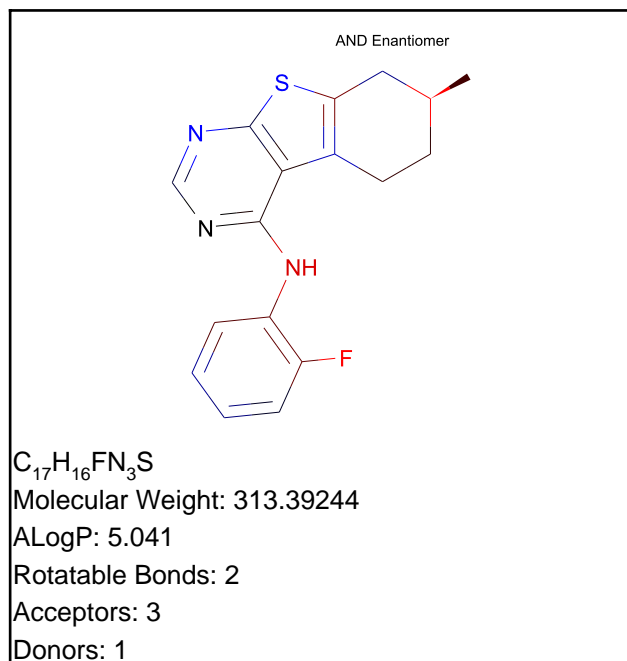

### Model Prediction

Prediction: 0.212

Unit: g/kg\_body\_weight

Mahalanobis Distance: 20.3

Mahalanobis Distance p-value: 6.1e-010

Mahalanobis Distance: The Mahalanobis distance (MD) is a generalization of the Euclidean distance that accounts for correlations among the X properties. It is calculated as the distance to the center of the training data. The larger the MD, the less trustworthy the prediction.

Mahalanobis Distance p-value: The p-value gives the fraction of training data with an MD greater than or equal to the one for the given sample, assuming normally distributed data. The smaller the p-value, the less trustworthy the prediction. For highly non-normal X properties (e.g., fingerprints), the MD p-value is wildly inaccurate.

### Structural Similar Compounds

| Name                        | BENOXAPROFEN                                                                        | FENTIAZAC                                                                           | .alpha.-(2-CHLOROPHENYL)-.alpha.-(4-CHLOROPHENYL)-5-PYRIDINE METHANOL               |
|-----------------------------|-------------------------------------------------------------------------------------|-------------------------------------------------------------------------------------|-------------------------------------------------------------------------------------|
| Structure                   | 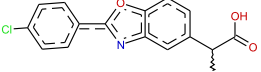 |  |  |
| Actual Endpoint (-log C)    | 3.408                                                                               | 2.907                                                                               | 2.122                                                                               |
| Predicted Endpoint (-log C) | 2.85166                                                                             | 2.69613                                                                             | 2.72534                                                                             |
| Distance                    | 0.530                                                                               | 0.554                                                                               | 0.570                                                                               |
| Reference                   | YACHDS 9;4445;81                                                                    | NIIRDN 6;APP-17;82                                                                  | FMCHA2 -;C254;89                                                                    |

### Model Applicability

Unknown features are fingerprint features in the query molecule, but not found or appearing too infrequently in the training set.

1. All properties and OPS components are within expected ranges.
2. Unknown ECFP\_2 feature: -1597579789: [\*]:n:[c]1:s:[\*]:[\*]:[c]:1:[\*]
3. Unknown FCFP\_6 feature: 16: [\*][c](:[\*]):[\*]
4. Unknown FCFP\_6 feature: 1747237384: [\*][c]1:[\*]:[\*]:[c](:[\*]):s:1
5. Unknown FCFP\_6 feature: -1564473960: [\*]:n:[c]1:s:[\*]:[\*]:[c]:1:[\*]
6. Unknown FCFP\_6 feature: -124685461: [\*]:n:[cH]:n:[\*]
7. Unknown FCFP\_6 feature: -1151884458: [\*]N[c](:n:[\*]):[c](:[\*]):[\*]
8. Unknown FCFP\_6 feature: 1293778554: [\*]:[c](:[\*])N[c](:[\*]):[\*]
9. Unknown FCFP\_6 feature: 1618154665: [\*][c](:[\*]):[cH]:[cH]:[\*]
10. Unknown FCFP\_6 feature: 71476542: [\*]:[c](:[\*])Cl

### Feature Contribution

#### Top features for positive contribution

| Fingerprint | Bit/Smiles | Feature Structure | Score |
|-------------|------------|-------------------|-------|
|             |            |                   |       |

|                                               |                   |                                                                                                                                   |              |
|-----------------------------------------------|-------------------|-----------------------------------------------------------------------------------------------------------------------------------|--------------|
| ECFP_6                                        | -1046436026       | <p>AND Enantiomer</p> 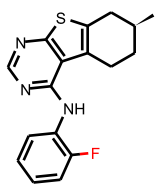 <p>[*]F</p>             | 0.349        |
| ECFP_6                                        | 642810091         | <p>AND Enantiomer</p>  <p>[*][c](:[*]):[*]</p> | 0.281        |
| ECFP_6                                        | -1897341097       | <p>AND Enantiomer</p>  <p>[*]N[*]</p>          | 0.216        |
| <b>Top Features for negative contribution</b> |                   |                                                                                                                                   |              |
| <b>Fingerprint</b>                            | <b>Bit/Smiles</b> | <b>Feature Structure</b>                                                                                                          | <b>Score</b> |
| ECFP_6                                        | 655739385         | <p>AND Enantiomer</p>  <p>[*]:n:[*]</p>      | -0.239       |
| ECFP_6                                        | 734603939         | <p>AND Enantiomer</p>  <p>[*]C</p>           | -0.201       |



|        |            |                                                                                                                                                                                                      |     |
|--------|------------|------------------------------------------------------------------------------------------------------------------------------------------------------------------------------------------------------|-----|
| FCFP_6 | 1539132615 | <p>AND Enantiomer</p> 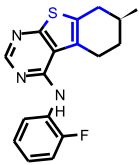 <p><chem>C1CN2C(S1)=NC(=N2)C3=CC=CC=C3F</chem></p> <p>[*]C[c]1:s:[*]:[*]:[c<br/>]:1[*]</p> | 0.2 |
|--------|------------|------------------------------------------------------------------------------------------------------------------------------------------------------------------------------------------------------|-----|

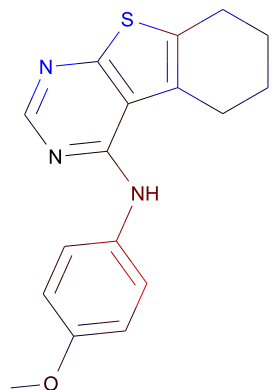

$C_{17}H_{17}N_3OS$

Molecular Weight: 311.40138

ALogP: 4.568

Rotatable Bonds: 3

Acceptors: 4

Donors: 1

### Model Prediction

Prediction: 0.45

Unit: g/kg\_body\_weight

Mahalanobis Distance: 18.2

Mahalanobis Distance p-value: 0.000275

Mahalanobis Distance: The Mahalanobis distance (MD) is a generalization of the Euclidean distance that accounts for correlations among the X properties. It is calculated as the distance to the center of the training data. The larger the MD, the less trustworthy the prediction.

Mahalanobis Distance p-value: The p-value gives the fraction of training data with an MD greater than or equal to the one for the given sample, assuming normally distributed data. The smaller the p-value, the less trustworthy the prediction. For highly non-normal X properties (e.g., fingerprints), the MD p-value is wildly inaccurate.

### Structural Similar Compounds

| Name                        | INDOMETHAZINE     | BENOXAPROFEN     | FENTIAZAC          |
|-----------------------------|-------------------|------------------|--------------------|
| Structure                   |                   |                  |                    |
| Actual Endpoint (-log C)    | 5.17              | 3.408            | 2.907              |
| Predicted Endpoint (-log C) | 3.33605           | 2.85166          | 2.69613            |
| Distance                    | 0.516             | 0.541            | 0.552              |
| Reference                   | ARZNAD 25;1526;75 | YACHDS 9;4445;81 | NIIRDN 6;APP-17;82 |

### Model Applicability

Unknown features are fingerprint features in the query molecule, but not found or appearing too infrequently in the training set.

1. All properties and OPS components are within expected ranges.
2. Unknown ECFP\_2 feature: -1597579789: [\*]:n:[c]1:s:[\*]:[\*]:[c]:1:[\*]
3. Unknown FCFP\_6 feature: 16: [\*][c](:[\*]):[\*]
4. Unknown FCFP\_6 feature: 1747237384: [\*][c]1:[\*]:[\*]:[c](:[\*]):s:1
5. Unknown FCFP\_6 feature: -1564473960: [\*]:n:[c]1:s:[\*]:[\*]:[c]:1:[\*]
6. Unknown FCFP\_6 feature: -124685461: [\*]:n:[cH]:n:[\*]
7. Unknown FCFP\_6 feature: -1151884458: [\*]N[c](:n:[\*]):[c](:[\*]):[\*]
8. Unknown FCFP\_6 feature: 1293778554: [\*]:[c](:[\*])N[c](:[\*]):[\*]
9. Unknown FCFP\_6 feature: 1618154665: [\*][c](:[\*]):[cH]:[cH]:[\*]

### Feature Contribution

#### Top features for positive contribution

| Fingerprint | Bit/Smiles | Feature Structure | Score |
|-------------|------------|-------------------|-------|
|             |            |                   |       |

| ECFP_6                                 | 642810091   | 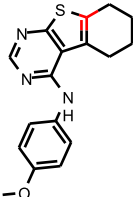<br>[*][c](:[*]):[*]                  | 0.281  |
|----------------------------------------|-------------|--------------------------------------------------------------------------------------------------------------------------|--------|
| ECFP_6                                 | -1897341097 | <br>[*]N[*]                           | 0.216  |
| FCFP_6                                 | 136627117   | <br>[*]OC                             | 0.17   |
| Top Features for negative contribution |             |                                                                                                                          |        |
| Fingerprint                            | Bit/Smiles  | Feature Structure                                                                                                        | Score  |
| ECFP_6                                 | -176455838  | <br>[*]O[c](:[cH]:[*]):[c<br>H]:[*] | -0.257 |
| ECFP_6                                 | 655739385   | <br>[*]:n:[*]                       | -0.239 |

|        |           |                                                                                             |        |
|--------|-----------|---------------------------------------------------------------------------------------------|--------|
| ECFP_6 | 734603939 | 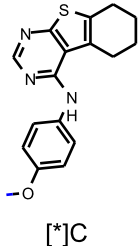<br>[*]C | -0.201 |
|--------|-----------|---------------------------------------------------------------------------------------------|--------|

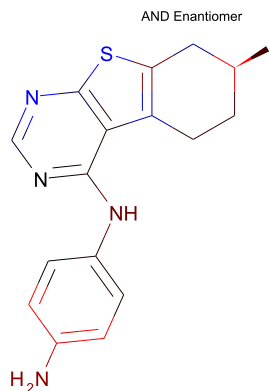

$C_{17}H_{18}N_4S$

Molecular Weight: 310.41662

ALogP: 4.089

Rotatable Bonds: 2

Acceptors: 4

Donors: 2

### Model Prediction

Prediction: 0.611

Unit: g/kg\_body\_weight

Mahalanobis Distance: 20.4

Mahalanobis Distance p-value: 2.67e-010

Mahalanobis Distance: The Mahalanobis distance (MD) is a generalization of the Euclidean distance that accounts for correlations among the X properties. It is calculated as the distance to the center of the training data. The larger the MD, the less trustworthy the prediction.

Mahalanobis Distance p-value: The p-value gives the fraction of training data with an MD greater than or equal to the one for the given sample, assuming normally distributed data. The smaller the p-value, the less trustworthy the prediction. For highly non-normal X properties (e.g., fingerprints), the MD p-value is wildly inaccurate.

### Structural Similar Compounds

| Name                        | FLUBENDAZOLE   | CARBAMIC ACID; N-(5-BENZOYL-BENZIMIDAZOL-2-YL)-; METHYL ESTER | NAPTALAM         |
|-----------------------------|----------------|---------------------------------------------------------------|------------------|
| Structure                   |                |                                                               |                  |
| Actual Endpoint (-log C)    | 2.088          | 2.617                                                         | 1.551            |
| Predicted Endpoint (-log C) | 2.69288        | 2.2368                                                        | 1.89036          |
| Distance                    | 0.574          | 0.582                                                         | 0.644            |
| Reference                   | YRTMA6 9;11;78 | IYKEDH 19;735;88                                              | FMCHA2 -;C206;89 |

### Model Applicability

Unknown features are fingerprint features in the query molecule, but not found or appearing too infrequently in the training set.

1. All properties and OPS components are within expected ranges.
2. Unknown ECFP\_2 feature: -1597579789: [\*]:n[c]1:s[\*]:[\*]:[c]:1:[\*]
3. Unknown FCFP\_6 feature: 16: [\*][c](:[\*]):[\*]
4. Unknown FCFP\_6 feature: 1747237384: [\*][c]1:[\*]:[\*]:[c](:[\*]):s:1
5. Unknown FCFP\_6 feature: -1564473960: [\*]:n[c]1:s[\*]:[\*]:[c]:1:[\*]
6. Unknown FCFP\_6 feature: -124685461: [\*]:n[cH]:n:[\*]
7. Unknown FCFP\_6 feature: -1151884458: [\*]N[c](:n[\*]):[c](:[\*]):[\*]
8. Unknown FCFP\_6 feature: 1293778554: [\*]:[c](:[\*])N[c](:[\*]):[\*]
9. Unknown FCFP\_6 feature: 1618154665: [\*][c](:[\*]):[cH]:[cH]:[\*]
10. Unknown FCFP\_6 feature: 1069584379: [\*]:[c](:[\*])N

### Feature Contribution

#### Top features for positive contribution

| Fingerprint | Bit/Smiles | Feature Structure | Score |
|-------------|------------|-------------------|-------|
|             |            |                   |       |

|                                               |                   |                                                                                                                                                |              |
|-----------------------------------------------|-------------------|------------------------------------------------------------------------------------------------------------------------------------------------|--------------|
| ECFP_6                                        | 642810091         | <p>AND Enantiomer</p> 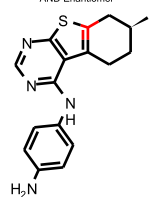 <p>[*][c](:[*]):[*]</p>              | 0.281        |
| ECFP_6                                        | 971820502         | <p>AND Enantiomer</p>  <p>[*]:[cH]:[c](N):[cH]:<br/>[*]</p> | 0.276        |
| ECFP_6                                        | -1897341097       | <p>AND Enantiomer</p>  <p>[*]N[*]</p>                       | 0.216        |
| <b>Top Features for negative contribution</b> |                   |                                                                                                                                                |              |
| <b>Fingerprint</b>                            | <b>Bit/Smiles</b> | <b>Feature Structure</b>                                                                                                                       | <b>Score</b> |
| ECFP_6                                        | 655739385         | <p>AND Enantiomer</p>  <p>[*]:n:[*]</p>                   | -0.239       |
| ECFP_6                                        | 734603939         | <p>AND Enantiomer</p>  <p>[*]C</p>                        | -0.201       |

|        |             |                                                                                                                                                            |      |
|--------|-------------|------------------------------------------------------------------------------------------------------------------------------------------------------------|------|
| FCFP_6 | -1539132615 | <p>AND Enantiomer</p> 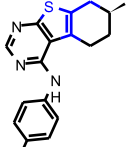 <p><chem>Nc1ccc(cc1)N2C=NC=C2C3CCCCC3</chem></p> | -0.2 |
|--------|-------------|------------------------------------------------------------------------------------------------------------------------------------------------------------|------|

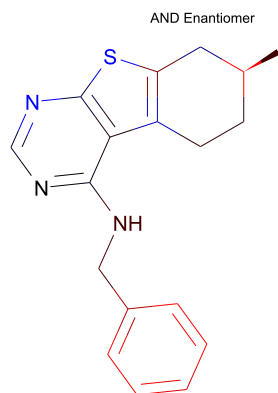

$C_{18}H_{19}N_3S$

Molecular Weight: 309.42856

ALogP: 4.678

Rotatable Bonds: 3

Acceptors: 3

Donors: 1

### Model Prediction

Prediction: 0.36

Unit: g/kg\_body\_weight

Mahalanobis Distance: 19.8

Mahalanobis Distance p-value: 2.15e-008

Mahalanobis Distance: The Mahalanobis distance (MD) is a generalization of the Euclidean distance that accounts for correlations among the X properties. It is calculated as the distance to the center of the training data. The larger the MD, the less trustworthy the prediction.

Mahalanobis Distance p-value: The p-value gives the fraction of training data with an MD greater than or equal to the one for the given sample, assuming normally distributed data. The smaller the p-value, the less trustworthy the prediction. For highly non-normal X properties (e.g., fingerprints), the MD p-value is wildly inaccurate.

### Structural Similar Compounds

| Name                        | BENOXAPROFEN     | FENTIAZAC          | TRIAMIMOL        |
|-----------------------------|------------------|--------------------|------------------|
| Structure                   |                  |                    |                  |
| Actual Endpoint (-log C)    | 3.408            | 2.907              | 2.742            |
| Predicted Endpoint (-log C) | 2.85166          | 2.69613            | 2.87257          |
| Distance                    | 0.497            | 0.539              | 0.557            |
| Reference                   | YACHDS 9;4445;81 | NIIRDN 6;APP-17;82 | FMCHA2 -;C293;89 |

### Model Applicability

Unknown features are fingerprint features in the query molecule, but not found or appearing too infrequently in the training set.

1. All properties and OPS components are within expected ranges.
2. Unknown ECFP\_2 feature: -1597579789: [\*]:n:[c]1:s:[\*]:[\*]:[c]:1:[\*]
3. Unknown FCFP\_6 feature: 16: [\*][c](:[\*]):[\*]
4. Unknown FCFP\_6 feature: 1747237384: [\*][c]1:[\*]:[\*]:[c](:[\*]):s:1
5. Unknown FCFP\_6 feature: -1564473960: [\*]:n:[c]1:s:[\*]:[\*]:[c]:1:[\*]
6. Unknown FCFP\_6 feature: -124685461: [\*]:n:[cH]:n:[\*]
7. Unknown FCFP\_6 feature: -1151884458: [\*]N[c](:n:[\*]):[c](:[\*]):[\*]
8. Unknown FCFP\_6 feature: 907096426: [\*]NC[c](:[\*]):[\*]
9. Unknown FCFP\_6 feature: 1618154665: [\*][c](:[\*]):[cH]:[cH]:[\*]

### Feature Contribution

#### Top features for positive contribution

| Fingerprint | Bit/Smiles | Feature Structure | Score |
|-------------|------------|-------------------|-------|
|             |            |                   |       |



|                                               |                   |                                                                                                                                                       |              |
|-----------------------------------------------|-------------------|-------------------------------------------------------------------------------------------------------------------------------------------------------|--------------|
| ECFP_6                                        | 642810091         | <p>AND Enantiomer</p> 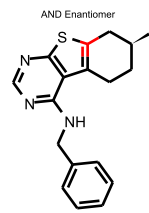 <p>[*][c](:[*]):[*]</p>                      | 0.281        |
| ECFP_6                                        | -1897341097       | <p>AND Enantiomer</p>  <p>[*]N[*]</p>                              | 0.216        |
| ECFP_6                                        | 1571214559        | <p>AND Enantiomer</p>  <p>[*]1:[cH]:[cH]:[cH]:[cH]:[cH]:[cH]:1</p> | 0.19         |
| <b>Top Features for negative contribution</b> |                   |                                                                                                                                                       |              |
| <b>Fingerprint</b>                            | <b>Bit/Smiles</b> | <b>Feature Structure</b>                                                                                                                              | <b>Score</b> |
| ECFP_6                                        | 655739385         | <p>AND Enantiomer</p>  <p>[*]:n:[*]</p>                          | -0.239       |
| ECFP_6                                        | 734603939         | <p>AND Enantiomer</p>  <p>[*]C</p>                               | -0.201       |

|        |            |                                                                                                                                                           |     |
|--------|------------|-----------------------------------------------------------------------------------------------------------------------------------------------------------|-----|
| FCFP_6 | 1539132615 | <p>AND Enantiomer</p> 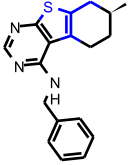 <p><chem>[*]C[c]1:s:[*]:[*]:[c]:1[*]</chem></p> | 0.2 |
|--------|------------|-----------------------------------------------------------------------------------------------------------------------------------------------------------|-----|

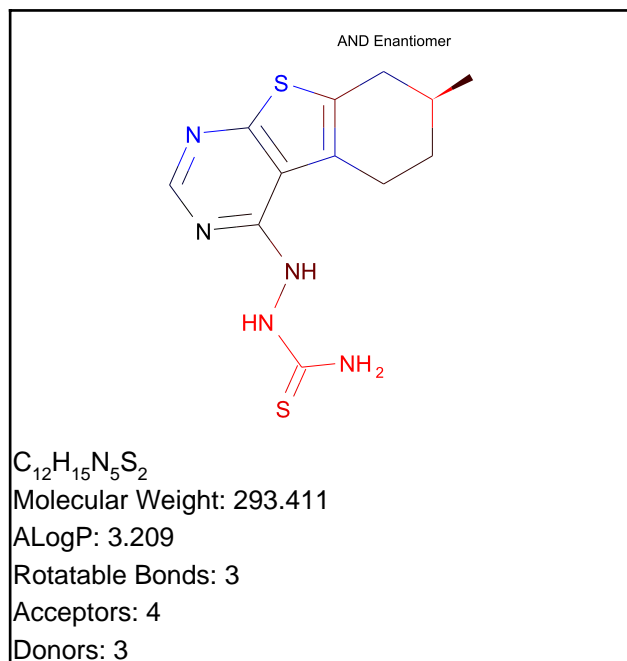

### Model Prediction

Prediction: 0.169

Unit: g/kg\_body\_weight

Mahalanobis Distance: 23.1

Mahalanobis Distance p-value: 4.71e-021

Mahalanobis Distance: The Mahalanobis distance (MD) is a generalization of the Euclidean distance that accounts for correlations among the X properties. It is calculated as the distance to the center of the training data. The larger the MD, the less trustworthy the prediction.

Mahalanobis Distance p-value: The p-value gives the fraction of training data with an MD greater than or equal to the one for the given sample, assuming normally distributed data. The smaller the p-value, the less trustworthy the prediction. For highly non-normal X properties (e.g., fingerprints), the MD p-value is wildly inaccurate.

### Structural Similar Compounds

| Name                        | 3-CYCLOPENTYLMETHYL HYDROCHLOROTHIAZIDE                                             | 2-ANILINO-5-NITROBENZENESULFONIC ACID; SODIUM SALT (Na STRIPPED)                    | SULFAMETHIZOLE                                                                      |
|-----------------------------|-------------------------------------------------------------------------------------|-------------------------------------------------------------------------------------|-------------------------------------------------------------------------------------|
| Structure                   | 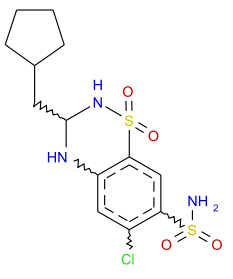 |  |  |
| Actual Endpoint (-log C)    | 2.58                                                                                | 2.126                                                                               | 1.687                                                                               |
| Predicted Endpoint (-log C) | 1.91133                                                                             | 2.19141                                                                             | 1.85826                                                                             |
| Distance                    | 0.709                                                                               | 0.714                                                                               | 0.735                                                                               |
| Reference                   | YAKUD5 21;775;79                                                                    | 85JCAE -;1061;86                                                                    | NIIRDN 6;388;82                                                                     |

### Model Applicability

Unknown features are fingerprint features in the query molecule, but not found or appearing too infrequently in the training set.

1. All properties and OPS components are within expected ranges.
2. Unknown ECFP\_2 feature: -1597579789: [\*]:n:[c]1:s:[\*]:[\*]:[c]:1:[\*]
3. Unknown FCFP\_6 feature: 16: [\*][c](:[\*]):[\*]
4. Unknown FCFP\_6 feature: 1747237384: [\*][c]1:[\*]:[\*]:[c](:[\*]):s:1
5. Unknown FCFP\_6 feature: -1564473960: [\*]:n:[c]1:s:[\*]:[\*]:[c]:1:[\*]
6. Unknown FCFP\_6 feature: -124685461: [\*]:n:[cH]:n:[\*]
7. Unknown FCFP\_6 feature: -1151884458: [\*]N[c](:n:[\*]):[c](:[\*]):[\*]
8. Unknown FCFP\_6 feature: 1294344583: [\*]NN[c](:[\*]):[\*]
9. Unknown FCFP\_6 feature: -885461129: [\*]NNC(=[\*])[\*]

### Feature Contribution

#### Top features for positive contribution

| Fingerprint | Bit/Smiles | Feature Structure | Score |
|-------------|------------|-------------------|-------|
|             |            |                   |       |

|                                               |                   |                                                                                                                                   |              |
|-----------------------------------------------|-------------------|-----------------------------------------------------------------------------------------------------------------------------------|--------------|
| ECFP_6                                        | 642810091         | <p>AND Enantiomer</p> 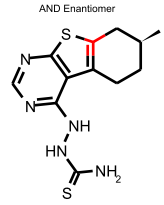 <p>[*][c](:[*]):[*]</p> | 0.281        |
| FCFP_6                                        | 1499521844        | <p>AND Enantiomer</p>  <p>[*]NC(=S)N</p>       | 0.258        |
| ECFP_6                                        | -1897341097       | <p>AND Enantiomer</p>  <p>[*]N[*]</p>          | 0.216        |
| <b>Top Features for negative contribution</b> |                   |                                                                                                                                   |              |
| <b>Fingerprint</b>                            | <b>Bit/Smiles</b> | <b>Feature Structure</b>                                                                                                          | <b>Score</b> |
| ECFP_6                                        | 655739385         | <p>AND Enantiomer</p>  <p>[*]:n:[*]</p>      | -0.239       |
| ECFP_6                                        | 734603939         | <p>AND Enantiomer</p>  <p>[*]C</p>           | -0.201       |

|        |            |                                                                                                                                                   |     |
|--------|------------|---------------------------------------------------------------------------------------------------------------------------------------------------|-----|
| FCFP_6 | 1539132615 | <p>AND Enantiomer</p> 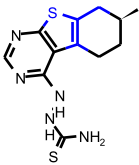 <p>[*]C[c]1:s:[*]:[*]:[c<br/>]:1[*]</p> | 0.2 |
|--------|------------|---------------------------------------------------------------------------------------------------------------------------------------------------|-----|

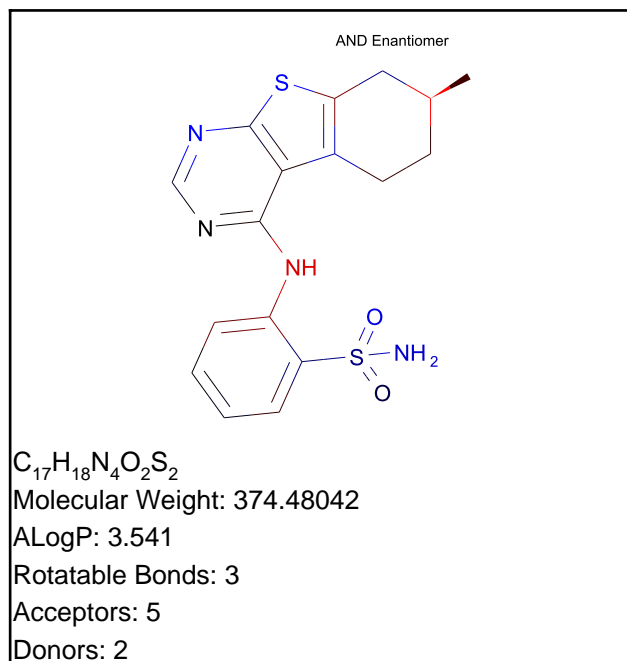

### Model Prediction

Prediction: 2.95

Unit: g/kg\_body\_weight

Mahalanobis Distance: 20.8

Mahalanobis Distance p-value: 1.37e-011

Mahalanobis Distance: The Mahalanobis distance (MD) is a generalization of the Euclidean distance that accounts for correlations among the X properties. It is calculated as the distance to the center of the training data. The larger the MD, the less trustworthy the prediction.

Mahalanobis Distance p-value: The p-value gives the fraction of training data with an MD greater than or equal to the one for the given sample, assuming normally distributed data. The smaller the p-value, the less trustworthy the prediction. For highly non-normal X properties (e.g., fingerprints), the MD p-value is wildly inaccurate.

### Structural Similar Compounds

| Name                        | SULFAQUINOXALINE                                                                    | 2-ANILINO-5-NITROBENZENESULFONIC ACID; SODIUM SALT (Na STRIPPED)                    | PIRETANIDE                                                                          |
|-----------------------------|-------------------------------------------------------------------------------------|-------------------------------------------------------------------------------------|-------------------------------------------------------------------------------------|
| Structure                   | 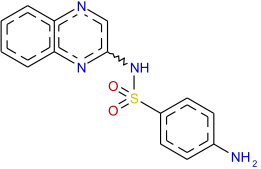 |  |  |
| Actual Endpoint (-log C)    | 2.341                                                                               | 2.126                                                                               | 1.811                                                                               |
| Predicted Endpoint (-log C) | 2.42674                                                                             | 2.19141                                                                             | 1.83976                                                                             |
| Distance                    | 0.631                                                                               | 0.658                                                                               | 0.662                                                                               |
| Reference                   | MahWM# 16NOV82                                                                      | 85JCAE -;1061;86                                                                    | DRFUD4 2;393;77                                                                     |

### Model Applicability

Unknown features are fingerprint features in the query molecule, but not found or appearing too infrequently in the training set.

1. All properties and OPS components are within expected ranges.
2. Unknown ECFP\_2 feature: -1597579789: [\*]:n:[c]1:s:[\*]:[\*]:[c]:1:[\*]
3. Unknown FCFP\_6 feature: 16: [\*][c](:[\*]):[\*]
4. Unknown FCFP\_6 feature: 1747237384: [\*][c]1:[\*]:[\*]:[c](:[\*]):s:1
5. Unknown FCFP\_6 feature: -1564473960: [\*]:n:[c]1:s:[\*]:[\*]:[c]:1:[\*]
6. Unknown FCFP\_6 feature: -124685461: [\*]:n:[cH]:n:[\*]
7. Unknown FCFP\_6 feature: -1151884458: [\*]N[c](:n:[\*]):[c](:[\*]):[\*]
8. Unknown FCFP\_6 feature: 1293778554: [\*]:[c](:[\*])N[c](:[\*]):[\*]
9. Unknown FCFP\_6 feature: 1618154665: [\*][c](:[\*]):[cH]:[cH]:[\*]

### Feature Contribution

#### Top features for positive contribution

| Fingerprint | Bit/Smiles | Feature Structure | Score |
|-------------|------------|-------------------|-------|
|             |            |                   |       |

|                                               |                   |                                                                                                                                                 |              |
|-----------------------------------------------|-------------------|-------------------------------------------------------------------------------------------------------------------------------------------------|--------------|
| ECFP_6                                        | 642810091         | <p>AND Enantiomer</p> 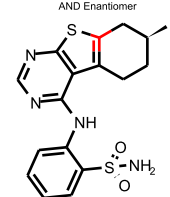 <p>[*][c](:[*]):[*]</p>               | 0.281        |
| ECFP_6                                        | -1897341097       | <p>AND Enantiomer</p>  <p>[*]N[*]</p>                        | 0.216        |
| ECFP_6                                        | -1074141656       | <p>AND Enantiomer</p>  <p>[*]=O</p>                          | 0.142        |
| <b>Top Features for negative contribution</b> |                   |                                                                                                                                                 |              |
| <b>Fingerprint</b>                            | <b>Bit/Smiles</b> | <b>Feature Structure</b>                                                                                                                        | <b>Score</b> |
| ECFP_6                                        | 655739385         | <p>AND Enantiomer</p>  <p>[*]:n:[*]</p>                    | -0.239       |
| FCFP_6                                        | -1096219292       | <p>AND Enantiomer</p>  <p>[*]:c](:[*])S(=O)(=O)<br/>]N</p> | -0.225       |

|        |           |                                                                                                                       |        |
|--------|-----------|-----------------------------------------------------------------------------------------------------------------------|--------|
| ECFP_6 | 734603939 | <p>AND Enantiomer</p> 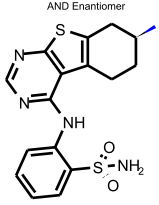 <p>[*]C</p> | -0.201 |
|--------|-----------|-----------------------------------------------------------------------------------------------------------------------|--------|



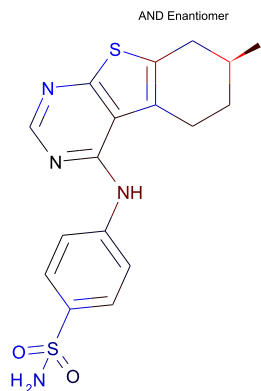
 $C_{17}H_{18}N_4O_2S_2$ 

Molecular Weight: 374.48042

ALogP: 3.541

Rotatable Bonds: 3

Acceptors: 5

Donors: 2

### Model Prediction

Prediction: 2.61

Unit: g/kg\_body\_weight

Mahalanobis Distance: 20.8

Mahalanobis Distance p-value: 9.44e-012

Mahalanobis Distance: The Mahalanobis distance (MD) is a generalization of the Euclidean distance that accounts for correlations among the X properties. It is calculated as the distance to the center of the training data. The larger the MD, the less trustworthy the prediction.

Mahalanobis Distance p-value: The p-value gives the fraction of training data with an MD greater than or equal to the one for the given sample, assuming normally distributed data. The smaller the p-value, the less trustworthy the prediction. For highly non-normal X properties (e.g., fingerprints), the MD p-value is wildly inaccurate.

### Structural Similar Compounds

| Name                        | SULFAQUINOXALINE | BENZOTHAZOLE; 6-NITRO-2-(p-NITROBENZOYLAMINO)- | PIRETANIDE      |
|-----------------------------|------------------|------------------------------------------------|-----------------|
| Structure                   |                  |                                                |                 |
| Actual Endpoint (-log C)    | 2.341            | 2.361                                          | 1.811           |
| Predicted Endpoint (-log C) | 2.42674          | 2.96257                                        | 1.83976         |
| Distance                    | 0.626            | 0.667                                          | 0.672           |
| Reference                   | MahWM# 16NOV82   | JPETAB 90;260;47                               | DRFUD4 2;393;77 |

### Model Applicability

Unknown features are fingerprint features in the query molecule, but not found or appearing too infrequently in the training set.

1. All properties and OPS components are within expected ranges.
2. Unknown ECFP\_2 feature: -1597579789: [\*]:n:[c]1:s:[\*]:[\*]:[c]:1:[\*]
3. Unknown FCFP\_6 feature: 16: [\*][c](:[\*]):[\*]
4. Unknown FCFP\_6 feature: 1747237384: [\*][c]1:[\*]:[\*]:[c](:[\*]):s:1
5. Unknown FCFP\_6 feature: -1564473960: [\*]:n:[c]1:s:[\*]:[\*]:[c]:1:[\*]
6. Unknown FCFP\_6 feature: -124685461: [\*]:n:[cH]:n:[\*]
7. Unknown FCFP\_6 feature: -1151884458: [\*]N[c](:n:[\*]):[c](:[\*]):[\*]
8. Unknown FCFP\_6 feature: 1293778554: [\*]:[c](:[\*])N[c](:[\*]):[\*]
9. Unknown FCFP\_6 feature: 1618154665: [\*][c](:[\*]):[cH]:[cH]:[\*]

### Feature Contribution

#### Top features for positive contribution

| Fingerprint | Bit/Smiles | Feature Structure | Score |
|-------------|------------|-------------------|-------|
|             |            |                   |       |

|                                               |                   |                                                      |              |
|-----------------------------------------------|-------------------|------------------------------------------------------|--------------|
| ECFP_6                                        | 642810091         | <p>AND Enantiomer</p> <p>[*][c](:[*]):[*]</p>        | 0.281        |
| ECFP_6                                        | -1897341097       | <p>AND Enantiomer</p> <p>[*]N[*]</p>                 | 0.216        |
| ECFP_6                                        | -1074141656       | <p>AND Enantiomer</p> <p>[*]=O</p>                   | 0.142        |
| <b>Top Features for negative contribution</b> |                   |                                                      |              |
| <b>Fingerprint</b>                            | <b>Bit/Smiles</b> | <b>Feature Structure</b>                             | <b>Score</b> |
| ECFP_6                                        | 655739385         | <p>AND Enantiomer</p> <p>[*]:n:[*]</p>               | -0.239       |
| FCFP_6                                        | -1096219292       | <p>AND Enantiomer</p> <p>[*]:[c](:[*])S(=O)(=O)N</p> | -0.225       |

|        |           |                                                                                                                       |        |
|--------|-----------|-----------------------------------------------------------------------------------------------------------------------|--------|
| ECFP_6 | 734603939 | <p>AND Enantiomer</p> 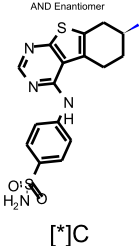 <p>[*]C</p> | -0.201 |
|--------|-----------|-----------------------------------------------------------------------------------------------------------------------|--------|

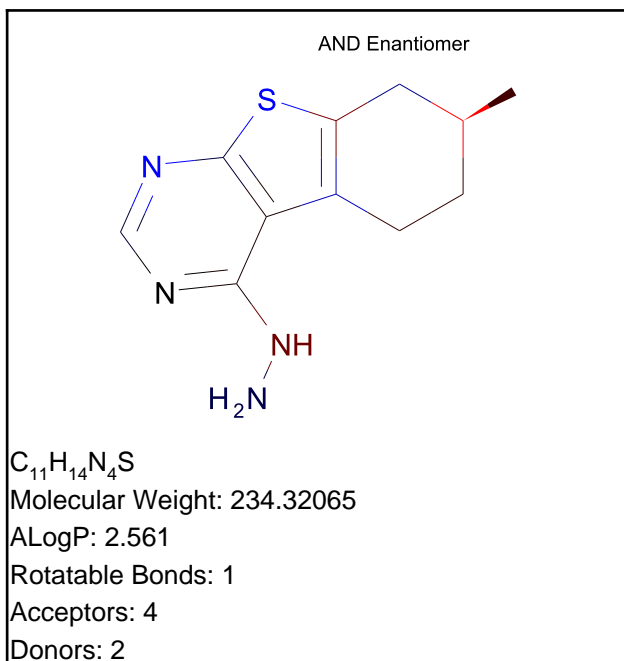

### Model Prediction

Prediction: 0.467

Unit: g/kg\_body\_weight

Mahalanobis Distance: 20.5

Mahalanobis Distance p-value: 1.49e-010

Mahalanobis Distance: The Mahalanobis distance (MD) is a generalization of the Euclidean distance that accounts for correlations among the X properties. It is calculated as the distance to the center of the training data. The larger the MD, the less trustworthy the prediction.

Mahalanobis Distance p-value: The p-value gives the fraction of training data with an MD greater than or equal to the one for the given sample, assuming normally distributed data. The smaller the p-value, the less trustworthy the prediction. For highly non-normal X properties (e.g., fingerprints), the MD p-value is wildly inaccurate.

### Structural Similar Compounds

| Name                        | PHENAZOPYRIDINE .HCI (HCI STRIPPED)                                                 | m-PHENYLENEDIAMINE; 4-(PHENYLAZO)-                                                  | 4;4'-SULFONYLDIPHENOL                                                               |
|-----------------------------|-------------------------------------------------------------------------------------|-------------------------------------------------------------------------------------|-------------------------------------------------------------------------------------|
| Structure                   | 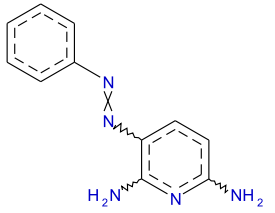 |  |  |
| Actual Endpoint (-log C)    | 2.724                                                                               | 2.109                                                                               | 1.74                                                                                |
| Predicted Endpoint (-log C) | 2.95034                                                                             | 2.69628                                                                             | 2.31209                                                                             |
| Distance                    | 0.497                                                                               | 0.527                                                                               | 0.530                                                                               |
| Reference                   | TXAPA9 1;42;59                                                                      | 85JCAE -;1308;86                                                                    | BIOFX* 601-05501;74                                                                 |

### Model Applicability

Unknown features are fingerprint features in the query molecule, but not found or appearing too infrequently in the training set.

1. All properties and OPS components are within expected ranges.
2. Unknown ECFP\_2 feature: -1597579789: [\*]:n:[c]1:s:[\*]:[\*]:[c]:1:[\*]
3. Unknown FCFP\_6 feature: 16: [\*][c](:[\*]):[\*]
4. Unknown FCFP\_6 feature: 1747237384: [\*][c]1:[\*]:[\*]:[c](:[\*]):s:1
5. Unknown FCFP\_6 feature: -1564473960: [\*]:n:[c]1:s:[\*]:[\*]:[c]:1:[\*]
6. Unknown FCFP\_6 feature: -124685461: [\*]:n:[cH]:n:[\*]
7. Unknown FCFP\_6 feature: -1151884458: [\*]N[c](:n:[\*]):[c](:[\*]):[\*]
8. Unknown FCFP\_6 feature: 1294344583: [\*]NN[c](:[\*]):[\*]
9. Unknown FCFP\_6 feature: 1070150408: [\*]NN

### Feature Contribution

#### Top features for positive contribution

| Fingerprint | Bit/Smiles | Feature Structure | Score |
|-------------|------------|-------------------|-------|
|             |            |                   |       |

|                                               |                   |                                                                                                                                   |              |
|-----------------------------------------------|-------------------|-----------------------------------------------------------------------------------------------------------------------------------|--------------|
| ECFP_6                                        | 642810091         | <p>AND Enantiomer</p> 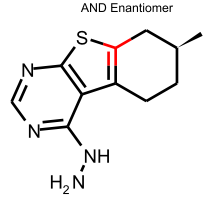 <p>[*][c](:[*]):[*]</p> | 0.281        |
| ECFP_6                                        | -1897341097       | <p>AND Enantiomer</p>  <p>[*]N[*]</p>          | 0.216        |
| ECFP_6                                        | 865482986         | <p>AND Enantiomer</p>  <p>[*]C([*])C</p>       | 0.132        |
| <b>Top Features for negative contribution</b> |                   |                                                                                                                                   |              |
| <b>Fingerprint</b>                            | <b>Bit/Smiles</b> | <b>Feature Structure</b>                                                                                                          | <b>Score</b> |
| ECFP_6                                        | 655739385         | <p>AND Enantiomer</p>  <p>[*]:n:[*]</p>       | -0.239       |
| ECFP_6                                        | 734603939         | <p>AND Enantiomer</p>  <p>[*]C</p>           | -0.201       |

|        |            |                                                                                                                                                    |     |
|--------|------------|----------------------------------------------------------------------------------------------------------------------------------------------------|-----|
| FCFP_6 | 1539132615 | <p>AND Enantiomer</p> 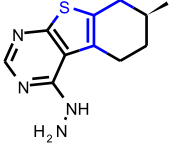 <p>[*]C[c]1:s:[*]:[*]:[c]<br/>]:1[*]</p> | 0.2 |
|--------|------------|----------------------------------------------------------------------------------------------------------------------------------------------------|-----|

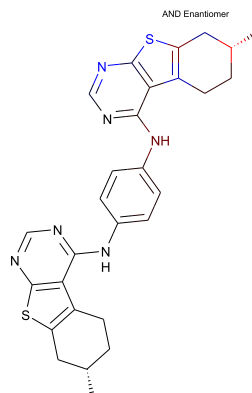
 $C_{28}H_{28}N_6S_2$ 

Molecular Weight: 512.69212

ALogP: 7.842

Rotatable Bonds: 4

Acceptors: 6

Donors: 2

### Model Prediction

Prediction: 0.705

Unit: g/kg\_body\_weight

Mahalanobis Distance: 25.3

Mahalanobis Distance p-value: 7.16e-033

Mahalanobis Distance: The Mahalanobis distance (MD) is a generalization of the Euclidean distance that accounts for correlations among the X properties. It is calculated as the distance to the center of the training data. The larger the MD, the less trustworthy the prediction.

Mahalanobis Distance p-value: The p-value gives the fraction of training data with an MD greater than or equal to the one for the given sample, assuming normally distributed data. The smaller the p-value, the less trustworthy the prediction. For highly non-normal X properties (e.g., fingerprints), the MD p-value is wildly inaccurate.

### Structural Similar Compounds

| Name                        | BENZENESULFONIC ACID; 2;2'-(4;4'-BIPHENYLYLENE)DI-; DISODIUM SALT (Na STRIPPED) | ANTHRAQUINONE; 1;4-bis-(p-TOLYLAMINO)- | FENDOSAL        |
|-----------------------------|---------------------------------------------------------------------------------|----------------------------------------|-----------------|
| Structure                   |                                                                                 |                                        |                 |
| Actual Endpoint (-log C)    | 1.968                                                                           | 2.058                                  | 2.928           |
| Predicted Endpoint (-log C) | 1.72109                                                                         | 1.57464                                | 2.59            |
| Distance                    | 0.793                                                                           | 0.960                                  | 1.025           |
| Reference                   | MVCRB3 2;193;73                                                                 | 85JCAE -,1330;86                       | AGACBH 8;209;78 |

### Model Applicability

Unknown features are fingerprint features in the query molecule, but not found or appearing too infrequently in the training set.

1. All properties and OPS components are within expected ranges.
2. Unknown ECFP\_2 feature: -1597579789: [\*]:n:[c]1:s:[\*]:[\*]:[c]:1:[\*]
3. Unknown FCFP\_6 feature: 16: [\*][c](:[\*]):[\*]
4. Unknown FCFP\_6 feature: 1747237384: [\*][c]1:[\*]:[\*]:[c](:[\*]):s:1
5. Unknown FCFP\_6 feature: -1564473960: [\*]:n:[c]1:s:[\*]:[\*]:[c]:1:[\*]
6. Unknown FCFP\_6 feature: -124685461: [\*]:n:[cH]:n:[\*]
7. Unknown FCFP\_6 feature: -1151884458: [\*]N[c](:n:[\*]):[c](:[\*]):[\*]
8. Unknown FCFP\_6 feature: 1293778554: [\*]:[c](:[\*])N[c](:[\*]):[\*]
9. Unknown FCFP\_6 feature: 1618154665: [\*][c](:[\*]):[cH]:[cH]:[\*]

### Feature Contribution

#### Top features for positive contribution

| Fingerprint | Bit/Smiles | Feature Structure | Score |
|-------------|------------|-------------------|-------|
|             |            |                   |       |

|                                               |                   |                                                                                                                                   |              |
|-----------------------------------------------|-------------------|-----------------------------------------------------------------------------------------------------------------------------------|--------------|
| ECFP_6                                        | 642810091         | <p>AND Enantiomer</p> 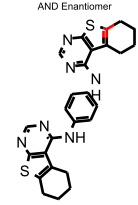 <p>[*][c](:[*]):[*]</p> | 0.281        |
| ECFP_6                                        | -1897341097       | <p>AND Enantiomer</p>  <p>[*]N[*]</p>          | 0.216        |
| ECFP_6                                        | 865482986         | <p>AND Enantiomer</p>  <p>[*]C([*])C</p>       | 0.132        |
| <b>Top Features for negative contribution</b> |                   |                                                                                                                                   |              |
| <b>Fingerprint</b>                            | <b>Bit/Smiles</b> | <b>Feature Structure</b>                                                                                                          | <b>Score</b> |
| ECFP_6                                        | 655739385         | <p>AND Enantiomer</p>  <p>[*]:n:[*]</p>      | -0.239       |
| ECFP_6                                        | 734603939         | <p>AND Enantiomer</p>  <p>[*]C</p>           | -0.201       |



|        |            |                                                                                                                                                   |     |
|--------|------------|---------------------------------------------------------------------------------------------------------------------------------------------------|-----|
| FCFP_6 | 1539132615 | <p>AND Enantiomer</p> 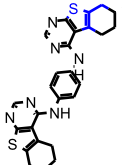 <p>[*]C[c]1:s:[*]:[*]:[c<br/>]:1[*]</p> | 0.2 |
|--------|------------|---------------------------------------------------------------------------------------------------------------------------------------------------|-----|

# Erlotinib

TOPKAT\_Rat\_Oral\_LD50

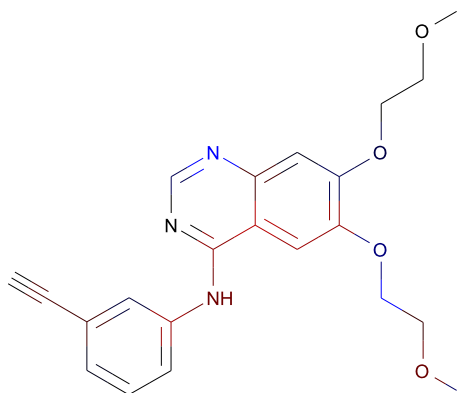

$C_{22}H_{23}N_3O_4$

Molecular Weight: 393.43572

ALogP: 4.309

Rotatable Bonds: 10

Acceptors: 7

Donors: 1

## Model Prediction

Prediction: 0.662

Unit: g/kg\_body\_weight

Mahalanobis Distance: 20.8

Mahalanobis Distance p-value: 9.57e-012

Mahalanobis Distance: The Mahalanobis distance (MD) is a generalization of the Euclidean distance that accounts for correlations among the X properties. It is calculated as the distance to the center of the training data. The larger the MD, the less trustworthy the prediction.

Mahalanobis Distance p-value: The p-value gives the fraction of training data with an MD greater than or equal to the one for the given sample, assuming normally distributed data. The smaller the p-value, the less trustworthy the prediction. For highly non-normal X properties (e.g., fingerprints), the MD p-value is wildly inaccurate.

## Structural Similar Compounds

| Name                        | TALNIFLUMATE     | 3-QUINOLINECARBOXYLIC ACID; 6;7-bis-(CYCLOPROPYLMETHOXY)-4-HYDROXY-; ETHYL ESTER | DIXYRAZINE .HCI (HCI STRIPPED) |
|-----------------------------|------------------|----------------------------------------------------------------------------------|--------------------------------|
| Structure                   |                  |                                                                                  |                                |
| Actual Endpoint (-log C)    | 1.538            | 2.076                                                                            | 3.029                          |
| Predicted Endpoint (-log C) | 2.82541          | 2.50101                                                                          | 2.47585                        |
| Distance                    | 0.615            | 0.615                                                                            | 0.654                          |
| Reference                   | FRPSAX 36;372;81 | TXAPA9 18;185;71                                                                 | ANPBAZ 61;669;61               |

## Model Applicability

Unknown features are fingerprint features in the query molecule, but not found or appearing too infrequently in the training set.

1. All properties and OPS components are within expected ranges.
2. Unknown ECFP\_2 feature: 1139738044: [\*]:c(:[\*])C#C
3. Unknown FCFP\_6 feature: 16: [\*][c](:[\*]):[\*]
4. Unknown FCFP\_6 feature: 1618154665: [\*][c](:[\*]):[cH]:[cH]:[\*]
5. Unknown FCFP\_6 feature: 1747237384: [\*][c]1:[\*]:[\*]:[c](:[\*]):s:1
6. Unknown FCFP\_6 feature: -124685461: [\*]:n:[cH]:n:[\*]
7. Unknown FCFP\_6 feature: -1151884458: [\*]N[c](:n:[\*]):[c](:[\*]):[\*]
8. Unknown FCFP\_6 feature: 1293778554: [\*]:[c](:[\*])N[c](:[\*]):[\*]
9. Unknown FCFP\_6 feature: 902193919: [\*]:[c](:[\*])C#C
10. Unknown FCFP\_6 feature: 131784192: [\*]C#C

## Feature Contribution

### Top features for positive contribution

| Fingerprint | Bit/Smiles | Feature Structure | Score |
|-------------|------------|-------------------|-------|
|             |            |                   |       |

|                                               |                   |                                                                                                        |              |
|-----------------------------------------------|-------------------|--------------------------------------------------------------------------------------------------------|--------------|
| ECFP_6                                        | 642810091         | 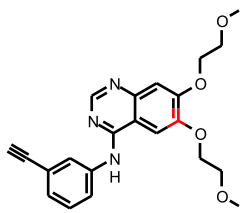<br>[*][c](:[*]):[*] | 0.281        |
| ECFP_6                                        | -1897341097       | <br>[*]N[*]         | 0.216        |
| FCFP_6                                        | 136627117         | <br>[*]OC           | 0.17         |
| <b>Top Features for negative contribution</b> |                   |                                                                                                        |              |
| <b>Fingerprint</b>                            | <b>Bit/Smiles</b> | <b>Feature Structure</b>                                                                               | <b>Score</b> |
| ECFP_6                                        | 655739385         | <br>[*]:n:[*]      | -0.239       |
| ECFP_6                                        | 734603939         | <br>[*]C          | -0.201       |

|        |            |                                                                                                                                          |        |
|--------|------------|------------------------------------------------------------------------------------------------------------------------------------------|--------|
| FCFP_6 | 1036089772 | 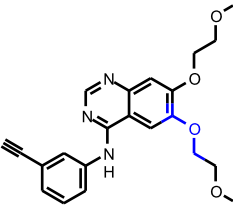 <p data-bbox="1402 321 1560 352">[*]:[c](:[*])OC</p> | -0.136 |
|--------|------------|------------------------------------------------------------------------------------------------------------------------------------------|--------|
